# Supplementary material for: PDZ-directed substrate recruitment is the primary determinant of specific 4E-BP1 dephosphorylation by PP1-Neurabin
Source: eLife journal article supplement (doi:10.7554/elife.103403), 2024-11-20
Supplement: fig1-figsupp1-data1 [file elife-103403-fig1-figsupp1-data1-v1.zip]

## Sheet: Sheet1
Date	IRSp53-wt transfection										IRSp53-L460A transfection
	PP1-Phactr1	PP1-Phactr2	PP1-Phactr3	PP1-Phactr4	PP1-Spinophilin	PP1-R15A	PP1-R15B	PP1-PNUTS	Vector		PP1-Phactr1	PP1-Phactr2	PP1-Phactr3	PP1-Phactr4	PP1-Spinophilin	PP1-R15A	PP1-R15B	PP1-PNUTS	Vector
200620	0.045897	0.072251	0.05365	0.073329	0.948038	0.951081	1.12094		1		0.1856	0.308626	0.261849	0.389269	0.854271	1.04217	0.777125		1
120620	0.085	0.098	0.098	0.14	0.916	0.749	0.979		1
180820	0.01056	0.048979	0.023809	0.044448	1.19805	0.985471	1.22169	2.38712	1		0.104353	0.221467	0.128159	0.193216	0.799052	1.06559	0.594089	1.008	1
130820	0.089357	0.099835	0.082782	0.098325	1.10595	0.923749	1.08012	1.94415	1		0.137934	0.264271	0.164229	0.24146	0.802253	1.00928		0.965176	1
p-value WT-vs-L460A	0.0345048	0.000765513	0.0265402	0.019587
