# Supplementary material for: PDZ-directed substrate recruitment is the primary determinant of specific 4E-BP1 dephosphorylation by PP1-Neurabin
Source: eLife journal article supplement (doi:10.7554/elife.103403), 2024-11-20
Supplement: fig3-data1 [file western_blot_band_quantification.xlsx]

## Sheet: tet titration 37-65-70
TET1 and TET2		2024-02-16
S65										GAPDH
Image Name	Channel	Name	Signal	Total	Area	Bkgnd.	Type			Image Name	Channel	Name	Signal	Total	Area	Bkgnd.	Type					S65
0001166_05	800	2	845000	1240000	1040	382	Signal			0001166_03	700	1	11000000	12300000	1037	1250	Signal		76.8182	1		1	1	1	1	1	1		1	1	1
0001166_05	800	4	734000	1170000	1040	418	Signal			0001166_03	700	2	10400000	11500000	986	1070	Signal		70.5769	0.918753		0.918753	1.09349	0.945839	0.838754	1.00475	0.862324
0001166_05	800	6	571000	882000	1040	299	Signal			0001166_03	700	3	10100000	11200000	1008	1060	Signal		56.5347	0.735954		0.735954	0.788291	0.852245	0.748718	0.752615	0.602565
0001166_05	800	8	321000	592000	1040	261	Signal			0001166_03	700	4	10300000	11400000	986	1100	Signal		31.165	0.405699		0.405699	0.44665	0.445772	0.336923	0.421348	0.309135
0001166_05	800	10	324000	513000	1040	182	Signal			0001166_03	700	5	10500000	11600000	1026	1040	Signal		30.8571	0.401691		0.401691	0.387193	0.335444	0.304835	0.404033	0.269379
0001166_05	800	12	318000	553000	1040	226	Signal			0001166_03	700	6	10000000	11100000	990	1100	Signal		31.8	0.413964		0.413964	0.301737	0.362731	0.284598	0.415197	0.199267		1.1457	0.811636	1.11765
0001166_05	800	14	758000	1110000	1040	342	Signal			0001166_03	700	7	8750000	9610000	944	912	Signal		86.6286	1
0001166_05	800	16	656000	1030000	1040	361	Signal			0001166_03	700	8	9330000	10300000	969	951	Signal		70.3108	0.811636
0001166_05	800	18	806000	1240000	1040	418	Signal			0001166_03	700	9	11200000	12700000	1140	1300	Signal		71.9643	1
0001166_05	800	20	746000	1120000	1040	355	Signal			0001166_03	700	10	9480000	10800000	986	1330	Signal		78.692	1.09349
0001166_05	800	22	548000	867000	1040	306	Signal			0001166_03	700	11	9660000	10700000	969	1070	Signal		56.7288	0.788291
0001166_05	800	24	360000	578000	1040	209	Signal			0001166_03	700	12	11200000	12300000	986	1160	Signal		32.1429	0.44665
0001166_05	800	26	287000	460000	1040	167	Signal			0001166_03	700	13	10300000	11400000	969	1150	Signal		27.8641	0.387193
0001166_05	800	28	228000	398000	1040	163	Signal			0001166_03	700	14	10500000	11600000	918	1190	Signal		21.7143	0.301737
pT70
Image Name	Channel	Name	Signal	Total	Area	Bkgnd.	Type															pT70
0001166_04	800	1	309000	488000	1380	130	Signal												28.0909	1		1	1	1	1	1	1		1	1	1
0001166_04	800	2	336000	527000	1488	128	Signal												32.3077	1.15011		1.15011	1.07588	1.56222	0.801347	0.838989	0.899756
0001166_04	800	3	245000	409000	1380	119	Signal												24.2574	0.863533		0.863533	0.804821	1.33282	1.03053	0.851927	0.881061
0001166_04	800	4	136000	289000	1380	111	Signal												13.2039	0.470041		0.470041	0.457045	0.846271	0.643018	0.569631	0.647595
0001166_04	800	5	124000	268000	1380	104	Signal												11.8095	0.420404		0.420404	0.444667	1.15882	0.490079	0.614424	0.603816
0001166_04	800	6	135000	276000	1380	102	Signal												13.5	0.480583		0.480583	0.324399	0.991839	0.469186	0.72456	0.616073		1.269	1.16653	1.11765
0001166_04	800	7	118000	259000	1380	102	Signal												13.4857
0001166_04	800	8	126000	270000	1380	104	Signal												13.5048	1.00142
0001166_04	800	9	291000	456000	1380	119	Signal												25.9821	1
0001166_04	800	10	265000	438000	1380	125	Signal												27.9536	1.07588
0001166_04	800	11	202000	367000	1380	119	Signal												20.911	0.804821
0001166_04	800	12	133000	287000	1380	111	Signal												11.875	0.457045
0001166_04	800	13	119000	275000	1380	113	Signal												11.5534	0.444667
0001166_04	800	14	88500	239000	1380	109	Signal												8.42857	0.324399
pT37
Image Name	Channel	Name	Signal	Total	Area	Bkgnd.	Type															pT37
0001166_06	800	1	2970000	3720000	2704	280	Signal												270	1		1	1	1	1	1	1		1	1	1
0001166_06	800	2	2940000	3750000	2704	300	Signal												282.692	1.04701		1.04701	1.28132	1.06628	0.828159	0.966971	0.878979
0001166_06	800	3	2830000	3570000	2704	275	Signal												280.198	1.03777		1.03777	1.1628	1.1459	0.92257	1.04228	0.848658
0001166_06	800	4	2560000	3180000	2704	232	Signal												248.544	0.920532		0.920532	0.848397	1.04938	0.718254	0.811721	0.621474
0001166_06	800	5	2670000	3250000	2704	215	Signal												254.286	0.941799		0.941799	0.903507	0.907384	0.631289	0.930656	0.634974
0001166_06	800	6	2400000	3030000	2704	234	Signal												240	0.888889		0.888889	0.628183	0.956047	0.626072	0.96705	0.547328		0.947405	1.01923	1.16088
0001166_06	800	7	1960000	2540000	2704	212	Signal												224	1
0001166_06	800	8	1980000	2540000	2704	209	Signal												212.219	0.947405
0001166_06	800	9	3430000	4220000	2704	290	Signal												306.25	1
0001166_06	800	10	3720000	4480000	2704	281	Signal												392.405	1.28132
0001166_06	800	11	3440000	4100000	2704	246	Signal												356.108	1.1628
0001166_06	800	12	2910000	3550000	2704	237	Signal												259.821	0.848397
0001166_06	800	13	2850000	3450000	2704	222	Signal												276.699	0.903507
0001166_06	800	14	2020000	2480000	2704	172	Signal												192.381	0.628183
pT37	TET3 and TET4		2024-03-14
Image Name	Channel	Name	Signal	Total	Area	Bkgnd.	Type			Image Name	Channel	Name	Signal	Total	Area	Bkgnd.	Type
0001207_02	700	1	2010000	3390000	2600	532	Signal			0001210_02	800	1	16200000	16800000	1008	575	Signal		124.074	1
0001207_02	700	2	2130000	3560000	2597	554	Signal			0001210_02	800	2	16100000	16800000	1037	645	Signal		132.298	1.06628
0001207_02	700	3	2090000	3550000	2208	659	Signal			0001210_02	800	3	14700000	15500000	880	1010	Signal		142.177	1.1459
0001207_02	700	4	1940000	3220000	2303	556	Signal			0001210_02	800	4	14900000	15700000	912	832	Signal		130.201	1.04938
0001207_02	700	5	1700000	2890000	2162	549	Signal			0001210_02	800	5	15100000	15700000	912	680	Signal		112.583	0.907384
0001207_02	700	6	1720000	2900000	2115	559	Signal			0001210_02	800	6	14500000	15100000	855	727	Signal		118.621	0.956047
0001207_02	700	7	2960000	4540000	2021	782	Signal			0001210_02	800	7	15900000	16600000	896	811	Signal		186.164	1
0001207_02	700	8	2960000	4650000	1880	898	Signal			0001210_02	800	8	15600000	16300000	918	723	Signal		189.744	1.01923
0001207_02	700	9	2120000	3630000	2021	745	Signal			0001210_02	800	9	14600000	15200000	864	700	Signal		145.205	1
0001207_02	700	10	1900000	3400000	1968	762	Signal			0001210_02	800	10	15800000	16500000	896	800	Signal		120.253	0.828159
0001207_02	700	11	2130000	3630000	2256	665	Signal			0001210_02	800	11	15900000	16800000	825	1150	Signal		133.962	0.92257
0001207_02	700	12	1700000	2880000	2112	558	Signal			0001210_02	800	12	16300000	16900000	896	621	Signal		104.294	0.718254
0001207_02	700	13	1540000	2760000	2585	470	Signal			0001210_02	800	22	16800000	18100000	832	1540	Signal		91.6667	0.631289
0001207_02	700	14	1600000	2750000	2601	443	Signal			0001210_02	800	23	17600000	18700000	850	1320	Signal		90.9091	0.626072
pS65
Image Name	Channel	Name	Signal	Total	Area	Bkgnd.	Type
0001215_02	700	1	1500000	2190000	1870	367	Signal												92.5926	1
0001215_02	700	2	1410000	2050000	1870	342	Signal												87.5776	0.945839
0001215_02	700	3	1160000	1800000	1870	344	Signal												78.9116	0.852245
0001215_02	700	4	615000	1140000	1870	281	Signal												41.2752	0.445772
0001215_02	700	5	469000	1010000	1870	289	Signal												31.0596	0.335444
0001215_02	700	6	487000	1030000	1870	293	Signal												33.5862	0.362731
0001215_02	700	7	1370000	2030000	1870	352	Signal												86.1635	1
0001215_02	700	8	1540000	2280000	1870	396	Signal												98.7179	1.1457
0001215_02	700	9	1300000	1920000	1870	333	Signal												89.0411	1
0001215_02	700	10	1180000	1840000	1870	351	Signal												74.6835	0.838754
0001215_02	700	11	1060000	1620000	1870	300	Signal												66.6667	0.748718
0001215_02	700	12	489000	1040000	1870	292	Signal												30	0.336923
0001215_02	700	13	456000	982000	1870	281	Signal												27.1429	0.304835
0001215_02	700	14	446000	996000	1870	294	Signal												25.3409	0.284598
pT70																					REPEAT - see below
0001215_02	700	15	113000	674000	1870	300	Signal												6.97531	1	1
0001215_02	700	16	107000	637000	1870	283	Signal												6.64596	0.952784	1.56222
0001215_02	700	17	134000	667000	1870	285	Signal												9.11565	1.30684	1.33282
0001215_02	700	18	100000	654000	1870	296	Signal												6.71141	0.962167	0.846271
0001215_02	700	19	107000	694000	1870	314	Signal												7.08609	1.01588	1.15882
0001215_02	700	20	109000	710000	1870	321	Signal												7.51724	1.07769	0.991839
0001215_02	700	21	253000	857000	1870	323	Signal												15.9119	1	1
0001215_02	700	22	315000	919000	1870	323	Signal												20.1923	1.269	1.16653
0001215_02	700	23	175000	732000	1870	298	Signal												11.9863	1	1
0001215_02	700	24	147000	716000	1870	304	Signal												9.3038	0.776203	0.801347
0001215_02	700	25	167000	728000	1870	300	Signal												10.5031	0.876262	1.03053
0001215_02	700	26	70800	624000	1870	296	Signal												4.34356	0.362377	0.643018
0001215_02	700	27	74300	611000	1870	287	Signal												4.42262	0.368973	0.490079
0001215_02	700	28	42700	576000	1870	285	Signal												2.42614	0.202409	0.469186
pT37	TET5 and TET6		2024-03-22
Image Name	Channel	Name	Signal	Total	Area	Bkgnd.	Type			Image Name	Channel	Name	Signal	Total	Area	Bkgnd.	Type
0001236_02	700	1	5310000	8670000	1960	1710	Signal			0001240_02	800	1	15000000	16800000	728	2520	Signal		354	1
0001236_02	700	2	5340000	9030000	1960	1880	Signal			0001240_02	800	3	15600000	16900000	832	1650	Signal		342.308	0.966971
0001236_02	700	3	5350000	8750000	1960	1740	Signal			0001240_02	800	5	14500000	15600000	816	1420	Signal		368.966	1.04228
0001236_02	700	4	4770000	7690000	1960	1490	Signal			0001240_02	800	6	16600000	17900000	880	1580	Signal		287.349	0.811721
0001236_02	700	5	4810000	7520000	1960	1380	Signal			0001240_02	800	7	14600000	15800000	780	1500	Signal		329.452	0.930656
0001236_02	700	6	4690000	7400000	1960	1380	Signal			0001240_02	800	8	13700000	14900000	750	1640	Signal		342.336	0.96705
0001236_02	700	7	5170000	8810000	1960	1860	Signal			0001240_02	800	11	15200000	16000000	867	1000	Signal		340.132	1
0001236_02	700	8	5370000	9140000	1960	1920	Signal			0001240_02	800	12	13600000	14600000	780	1330	Signal		394.853	1.16088
0001236_02	700	9	6250000	10000000	1960	1940	Signal			0001240_02	800	13	15100000	16000000	901	1090	Signal		413.907	1
0001236_02	700	10	5530000	9030000	1960	1780	Signal			0001240_02	800	14	15200000	16400000	816	1490	Signal		363.816	0.878979
0001236_02	700	11	5550000	8730000	1960	1620	Signal			0001240_02	800	15	15800000	17000000	864	1370	Signal		351.266	0.848658
0001236_02	700	12	4090000	6730000	1960	1340	Signal			0001240_02	800	16	15900000	17000000	832	1350	Signal		257.233	0.621474
0001236_02	700	13	4100000	6550000	1960	1250	Signal			0001240_02	800	17	15600000	17000000	784	1840	Signal		262.821	0.634974
0001236_02	700	14	3670000	6110000	1960	1240	Signal			0001240_02	800	18	16200000	17400000	880	1420	Signal		226.543	0.547328
pS65
Image Name	Channel	Name	Signal	Total	Area	Bkgnd.	Type
0001236_02	700	15	3560000	5150000	1320	1210	Signal												237.333	1
0001236_02	700	16	3720000	5570000	1320	1400	Signal												238.462	1.00475
0001236_02	700	17	2590000	4110000	1200	1270	Signal												178.621	0.752615
0001236_02	700	18	1660000	3010000	1200	1120	Signal												100	0.421348
0001236_02	700	19	1400000	2650000	1200	1040	Signal												95.8904	0.404033
0001236_02	700	20	1350000	2630000	1200	1070	Signal												98.5401	0.415197
0001236_02	700	21	3660000	5520000	1200	1550	Signal												240.789	1
0001236_02	700	22	3660000	5350000	1200	1410	Signal												269.118	1.11765
0001236_02	700	23	3410000	5060000	1200	1380	Signal												225.828	1
0001236_02	700	24	2960000	4480000	1200	1270	Signal												194.737	0.862324
0001236_02	700	25	2150000	3410000	1200	1050	Signal												136.076	0.602565
0001236_02	700	26	1110000	2240000	1200	938	Signal												69.8113	0.309135
0001236_02	700	27	949000	1980000	1200	858	Signal												60.8333	0.269379
0001236_02	700	28	729000	1690000	1200	803	Signal												45	0.199267
pT70
0001236_02	700	29	1020000	4280000	1600	2040	Signal												68	1
0001236_02	700	30	890000	3860000	1600	1860	Signal												57.0513	0.838989
0001236_02	700	31	840000	3870000	1600	1890	Signal												57.931	0.851927
0001236_02	700	32	643000	3540000	1600	1810	Signal												38.7349	0.569631
0001236_02	700	33	610000	3470000	1600	1790	Signal												41.7808	0.614424
0001236_02	700	34	675000	3560000	1600	1800	Signal												49.2701	0.72456
0001236_02	700	35	1010000	3970000	1600	1860	Signal												66.4474	1
0001236_02	700	36	1010000	4040000	1600	1890	Signal												74.2647	1.11765
0001236_02	700	37	1050000	4070000	1600	1890	Signal												69.5364	1
0001236_02	700	38	951000	3820000	1600	1800	Signal												62.5658	0.899756
0001236_02	700	39	968000	3950000	1600	1860	Signal												61.2658	0.881061
0001236_02	700	40	716000	3680000	1600	1850	Signal												45.0314	0.647595
0001236_02	700	41	655000	3810000	1600	1970	Signal												41.9872	0.603816
0001236_02	700	42	694000	3750000	1600	1910	Signal												42.8395	0.616073
tet3-tet4 - repeat
pT70										GAPDH
Image Name	Channel	Name	Signal	Total	Area	Bkgnd.	Type			Image Name	Channel	Name	Signal	Total	Area	Bkgnd.	Type
0001243_03	700	1	740000	2060000	1518	872	Signal			0001243_04	800	2	4800000	5040000	900	269	Signal		154.167	1
0001243_03	700	2	973000	2270000	1485	876	Signal			0001243_04	800	4	4040000	4130000	624	568	Signal		240.842	1.56222
0001243_03	700	3	863000	2180000	1440	917	Signal			0001243_04	800	5	4200000	4480000	770	360	Signal		205.476	1.33282
0001243_03	700	4	531000	1650000	1316	849	Signal			0001243_04	800	6	4070000	4290000	855	250	Signal		130.467	0.846271
0001243_03	700	5	636000	1760000	1350	833	Signal			0001243_04	800	7	3560000	3660000	676	335	Signal		178.652	1.15882
0001243_03	700	6	552000	1710000	1350	859	Signal			0001243_04	800	8	3610000	3680000	648	323	Signal		152.909	0.991839
0001243_03	700	7	1510000	2880000	1350	1010	Signal			0001243_04	800	9	3700000	3710000	624	431	Signal		408.108	1
0001243_03	700	8	1890000	3400000	1350	1120	Signal			0001243_04	800	10	3970000	3830000	588	645	Signal		476.071	1.16653
0001243_03	700	9	1010000	2350000	1350	993	Signal			0001243_04	800	11	3870000	3840000	596	243	Signal		260.982	1
0001243_03	700	10	824000	2250000	1350	1060	Signal			0001243_04	800	12	3940000	4000000	648	481	Signal		209.137	0.801347
0001243_03	700	11	1100000	2490000	1350	1030	Signal			0001243_04	800	13	4090000	4050000	582	258	Signal		268.949	1.03053
0001243_03	700	12	730000	1990000	1350	936	Signal			0001243_04	800	14	4350000	4410000	754	293	Signal		167.816	0.643018
0001243_03	700	13	573000	1880000	1350	969	Signal			0001243_04	800	15	4480000	4620000	944	224	Signal		127.902	0.490079
0001243_03	700	14	660000	1800000	1350	846	Signal			0001243_04	800	16	5390000	6530000	1037	403	Signal		122.449	0.469186

## Sheet: tet titration S6K
2024-02-16	TET1-TET2
421									GAPDH
0001168_02	800	1	88000	149000	752	81	Signal		0001168_02	700	84	20200000	23100000	1281	2280	Signal		4.35644	1	1	1
0001168_02	800	2	105000	168000	768	81	Signal		0001168_02	700	85	19500000	22300000	1134	2430	Signal		5.38462	1.23601	1.18283	0.994429
0001168_02	800	3	104000	163000	720	81	Signal		0001168_02	700	86	19100000	21700000	1134	2270	Signal		5.44503	1.24988	1.16869	0.919434
0001168_02	800	4	97800	159000	752	81	Signal		0001168_02	700	87	15700000	17800000	1045	2020	Signal		6.2293	1.42991	1.00171	0.943078
0001168_02	800	5	99200	161000	768	81	Signal		0001168_02	700	88	19800000	22400000	1134	2340	Signal		5.0101	1.15005	1.04622	0.828664
0001168_02	800	6	99700	159000	752	79	Signal		0001168_02	700	89	19300000	22100000	1134	2420	Signal		5.1658	1.18579	0.927531	0.908081
0001168_02	800	7	87800	150000	784	79	Signal		0001168_02	700	90	18800000	20700000	1134	1650	Signal		4.67021	1	1	1
0001168_02	800	8	86200	148000	768	81	Signal		0001168_02	700	91	18700000	20500000	1134	1580	Signal		4.60963	0.987027	1.04844	1.11539
0001168_02	800	9	102000	166000	768	83	Signal		0001168_02	700	92	19600000	22000000	1134	2080	Signal		5.20408	1	1	1
0001168_02	800	10	109000	176000	850	79	Signal		0001168_02	700	93	21900000	24000000	1134	1780	Signal		4.97717	0.956397	1.02822	0.985289
0001168_02	800	11	97200	163000	833	79	Signal		0001168_02	700	94	22400000	25000000	1134	2360	Signal		4.33929	0.833824	1.02434	0.974839
0001168_02	800	12	92100	157000	816	79	Signal		0001168_02	700	95	21900000	25000000	1134	2780	Signal		4.20548	0.808112	0.827262	0.846415				421						389						371
0001168_02	800	13	91500	155000	784	81	Signal		0001168_02	700	96	22100000	25300000	1134	2830	Signal		4.14027	0.795582	0.829504	0.776094				1	1	1	1	1	1	1	1	1	1	1	1	1		1	1		1	1	1	1				1
0001168_02	800	14	82900	152000	900	77	Signal		0001168_02	700	97	25300000	28200000	1260	2250	Signal		3.27668	0.629637	0.625178	0.751723				1.23601	1.18283	0.994429	0.956397	1.02822	0.985289	1.00658	0.972509	1.03429	0.920522	0.980203	0.913733	1.00079		0.977168	0.9888		0.915845
																									1.24988	1.16869	0.919434	0.833824	1.02434	0.974839	0.897928	1.03349	0.892857	0.843373	0.93515	0.715924	1.13846		0.902028	0.949784		0.767106
																									1.42991	1.00171	0.943078	0.808112	0.827262	0.846415	0.76389	0.952942	0.924287	0.719696	0.790272	0.705972	1.02761		0.861827	0.916881		0.738483
389									GAPDH																1.15005	1.04622	0.828664	0.795582	0.829504	0.776094	0.680466	0.948362	0.853642	0.672776	0.740023	0.616265	0.981247		0.817007	0.841294		0.657475
0001168_02	800	15	51100	102000	624	81	Signal		0001168_02	700	98	21300000	23400000	1134	1800	Signal		2.39906	1	1	1				1.18579	0.927531	0.908081	0.629637	0.625178	0.751723	0.626147	0.967716	0.955887	0.661378	0.631159	0.614603	1.05035		0.984594	0.666959		0.651054	0.987027	1.04844	1.11539				0.859944
0001168_02	800	16	55300	109000	686	79	Signal		0001168_02	700	99	22900000	25300000	1134	2060	Signal		2.41485	1.00658	0.972509	1.03429
0001168_02	800	17	48900	102000	672	79	Signal		0001168_02	700	100	22700000	24800000	1134	1800	Signal		2.15419	0.897928	1.03349	0.892857
0001168_02	800	18	42700	100000	750	77	Signal		0001168_02	700	101	23300000	25500000	1134	1940	Signal		1.83262	0.76389	0.952942	0.924287
0001168_02	800	19	38200	92400	686	79	Signal		0001168_02	700	102	23400000	26000000	1134	2310	Signal		1.63248	0.680466	0.948362	0.853642
0001168_02	800	20	34700	90200	720	77	Signal		0001168_02	700	103	23100000	25500000	1092	2220	Signal		1.50216	0.626147	0.967716	0.955887
0001168_02	800	21	85200	150000	750	86	Signal		0001168_02	700	104	23900000	26200000	1134	1970	Signal		3.56485	1	1	1
0001168_02	800	22	74800	133000	672	86	Signal		0001168_02	700	105	24400000	26500000	1134	1880	Signal		3.06557	0.859944	1.20033	1.03321
0001168_02	800	23	53000	111000	720	81	Signal		0001168_02	700	106	23400000	26800000	1000	3460	Signal		2.26496	1	1	1
0001168_02	800	24	54000	109000	700	79	Signal		0001168_02	700	107	25900000	29300000	1134	2980	Signal		2.08494	0.920522	0.980203	0.913733
0001168_02	800	25	46800	99900	672	79	Signal		0001168_02	700	108	24500000	28000000	1134	3080	Signal		1.9102	0.843373	0.93515	0.715924
0001168_02	800	26	40100	95400	700	79	Signal		0001168_02	700	109	24600000	27800000	1134	2870	Signal		1.63008	0.719696	0.790272	0.705972
0001168_02	800	27	38400	97200	784	75	Signal		0001168_02	700	110	25200000	28300000	1134	2790	Signal		1.52381	0.672776	0.740023	0.616265
0001168_02	800	28	37300	95200	752	77	Signal		0001168_02	700	111	24900000	26900000	1134	1790	Signal		1.49799	0.661378	0.631159	0.614603
371									GAPDH
0001168_02	800	29	60200	121000	705	86	Signal		0001168_02	700	112	21400000	24100000	1134	2330	Signal		2.81308	1
0001168_02	800	31	62500	123000	672	90	Signal		0001168_02	700	113	22200000	25500000	1134	2900	Signal		2.81532	1.00079
0001168_02	800	32	74300	132000	690	83	Signal		0001168_02	700	114	23200000	25500000	1134	2080	Signal		3.20259	1.13846
0001168_02	800	33	68800	133000	768	83	Signal		0001168_02	700	115	23800000	25900000	1134	1840	Signal		2.89076	1.02761
0001168_02	800	34	66800	125000	672	86	Signal		0001168_02	700	116	24200000	26400000	1134	1980	Signal		2.76033	0.981247
0001168_02	800	35	71800	130000	705	83	Signal		0001168_02	700	117	24300000	26500000	1134	1900	Signal		2.95473	1.05035
0001168_02	800	36	32500	91800	750	79	Signal		0001168_02	700	118	22400000	23600000	1134	1070	Signal		1.45089	1
0001168_02	800	37	38500	102000	799	79	Signal		0001168_02	700	119	22400000	23700000	1134	1100	Signal		1.71875	1.18462
0001168_02	800	38	67000	131000	768	83	Signal		0001168_02	700	120	24700000	27100000	1134	2110	Signal		2.71255	1
0001168_02	800	39	69200	134000	784	83	Signal		0001168_02	700	121	25800000	28600000	1134	2380	Signal		2.68217	0.9888
0001168_02	800	40	67500	127000	720	83	Signal		0001168_02	700	122	26200000	28300000	1113	1880	Signal		2.57634	0.949784
0001168_02	800	41	67400	132000	784	83	Signal		0001168_02	700	123	27100000	29200000	1134	1870	Signal		2.48708	0.916881
0001168_02	800	42	62300	125000	750	83	Signal		0001168_02	700	124	27300000	29600000	1134	2020	Signal		2.28205	0.841294
0001168_02	800	43	47400	105000	672	86	Signal		0001168_02	700	125	26200000	28200000	1134	1750	Signal		1.80916	0.666959
2024-03-14	TET3-TET4
421									Image Name	Channel	Name	Signal	Total	Area	Bkgnd.	Type						Image Name	Channel	Name	Signal	Total	Area	Bkgnd.					Type
0001210_02	700	24	228000	465000	850	279	Signal		0001210_02	800	38	5040000	5260000	702	325	Signal		45.2381	1	1		0001210_02	800	38	5040000	5260000	702	325					Signal
0001210_02	700	25	265000	504000	900	266	Signal		0001210_02	800	39	5070000	5280000	756	280	Signal		52.2682	1.1554	0.994429		0001210_02	800	39	5070000	5280000	756	280					Signal
0001210_02	700	26	250000	478000	850	268	Signal		0001210_02	800	40	4650000	4910000	636	412	Signal		53.7634	1.18846	0.919434		0001210_02	800	40	4650000	4910000	636	412					Signal
0001210_02	700	27	194000	429000	867	271	Signal		0001210_02	800	41	4380000	4540000	756	219	Signal		44.2922	0.979092	0.943078		0001210_02	800	41	4380000	4540000	756	219					Signal
0001210_02	700	28	204000	431000	918	248	Signal		0001210_02	800	42	4410000	4550000	756	194	Signal		46.2585	1.02256	0.828664		0001210_02	800	42	4410000	4550000	756	194					Signal
0001210_02	700	29	178000	418000	901	266	Signal		0001210_02	800	43	4260000	4470000	702	298	Signal		41.784	0.923647	0.908081		0001210_02	800	43	4260000	4470000	702	298					Signal
0001210_02	700	30	184000	423000	950	251	Signal		0001210_02	800	44	4710000	4860000	728	209	Signal		39.0658	1	1		0001210_02	800	44	4710000	4860000	728	209					Signal
0001210_02	700	31	197000	455000	912	283	Signal		0001210_02	800	45	4810000	4960000	742	201	Signal		40.9563	1.04839	1.11539		0001210_02	800	45	4810000	4960000	742	201					Signal
0001210_02	700	32	207000	445000	867	275	Signal		0001210_02	800	46	4380000	4540000	728	221	Signal		47.2603	1	1		0001210_02	800	46	4380000	4540000	728	221					Signal
0001210_02	700	33	223000	487000	912	290	Signal		0001210_02	800	47	4580000	4750000	728	236	Signal		48.69	1.03025	0.985289		0001210_02	800	47	4580000	4750000	728	236					Signal
0001210_02	700	34	253000	494000	900	268	Signal		0001210_02	800	49	5080000	5310000	663	350	Signal		49.8031	1.05381	0.974839		0001210_02	800	49	5080000	5310000	663	350					Signal
0001210_02	700	35	216000	488000	1071	254	Signal		0001210_02	800	50	5550000	5760000	798	266	Signal		38.9189	0.823502	0.846415		0001210_02	800	50	5550000	5760000	798	266					Signal
0001210_02	700	36	224000	528000	1196	254	Signal		0001210_02	800	51	5740000	5970000	798	283	Signal		39.0244	0.825733	0.776094		0001210_02	800	51	5740000	5970000	798	283					Signal
0001210_02	700	37	160000	399000	1050	228	Signal		0001210_02	800	52	5440000	5510000	900	77	Signal		29.4118	0.622336	0.751723		0001210_02	800	52	5440000	5510000	900	77					Signal
389									Image Name	Channel	Name	Signal	Total	Area	Bkgnd.	Type
0001210_02	700	84	291000	634000	1113	308	Signal		0001210_02	800	1	15800000	16500000	900	825	Signal		18.4177	1	1
0001210_02	700	69	283000	622000	1040	326	Signal		0001210_02	800	2	15800000	16600000	944	858	Signal		17.9114	0.972509	1.03429
0001210_02	700	70	276000	617000	1040	328	Signal		0001210_02	800	3	14500000	15400000	832	1070	Signal		19.0345	1.03349	0.892857
0001210_02	700	71	258000	576000	1040	306	Signal		0001210_02	800	4	14700000	15500000	848	860	Signal		17.551	0.952942	0.924287
0001210_02	700	72	262000	593000	1040	318	Signal		0001210_02	800	5	15000000	15600000	880	694	Signal		17.4667	0.948362	0.853642
0001210_02	700	73	262000	578000	1040	304	Signal		0001210_02	800	6	14700000	15200000	864	612	Signal		17.8231	0.967716	0.955887
0001210_02	700	74	276000	592000	1040	304	Signal		0001210_02	800	7	15800000	16500000	880	811	Signal		17.4684	1	1
0001210_02	700	75	325000	659000	1040	321	Signal		0001210_02	800	8	15500000	16200000	884	748	Signal		20.9677	1.20033	1.03321
0001210_02	700	76	333000	649000	1040	304	Signal		0001210_02	800	9	14600000	15200000	848	705	Signal		22.8082	1	1
0001210_02	700	77	351000	670000	1040	306	Signal		0001210_02	800	10	15700000	16400000	848	818	Signal		22.3567	0.980203	0.913733
0001210_02	700	78	337000	653000	1040	304	Signal		0001210_02	800	11	15800000	16700000	795	1190	Signal		21.3291	0.93515	0.715924
0001210_02	700	79	292000	590000	1040	287	Signal		0001210_02	800	12	16200000	16800000	864	646	Signal		18.0247	0.790272	0.705972
0001210_02	700	80	292000	586000	1040	283	Signal		0001210_02	800	22	17300000	18500000	880	1340	Signal		16.8786	0.740023	0.616265
0001210_02	700	81	262000	565000	1040	291	Signal		0001210_02	800	23	18200000	19200000	918	1110	Signal		14.3956	0.631159	0.614603
250324
371									gapdh
0001240_02	700	19	264000	725000	900	512	Signal		0001240_02	800	61	14800000	15300000	1140	494	Signal		17.8378	1
0001240_02	700	20	251000	686000	816	533	Signal		0001240_02	800	62	14400000	15000000	1064	552	Signal		17.4306	0.977168
0001240_02	700	21	214000	676000	900	514	Signal		0001240_02	800	63	13300000	13700000	1100	383	Signal		16.0902	0.902028
0001240_02	700	22	206000	633000	833	512	Signal		0001240_02	800	64	13400000	14100000	1026	645	Signal		15.3731	0.861827
0001240_02	700	23	188000	576000	735	528	Signal		0001240_02	800	65	12900000	13500000	1026	619	Signal		14.5736	0.817007
0001240_02	700	24	209000	666000	882	518	Signal		0001240_02	800	66	11900000	12500000	935	704	Signal		17.563	0.984594
0001240_02	700	25	237000	649000	768	536	Signal		0001240_02	800	67	11200000	11900000	850	718	Signal		21.1607	1
0001240_02	700	26	240000	629000	705	552	Signal		0001240_02	800	68	12000000	12500000	918	539	Signal		20	0.945148
0001240_02	700	27	284000	703000	784	534	Signal		0001240_02	800	69	12600000	13300000	884	796	Signal		22.5397	1
0001240_02	700	28	289000	738000	816	550	Signal		0001240_02	800	70	14000000	14800000	884	884	Signal		20.6429	0.915845
0001240_02	700	29	268000	658000	720	542	Signal		0001240_02	800	71	15500000	16400000	954	962	Signal		17.2903	0.767106
0001240_02	700	30	258000	633000	705	531	Signal		0001240_02	800	72	15500000	16400000	884	942	Signal		16.6452	0.738483
0001240_02	700	31	246000	630000	735	522	Signal		0001240_02	800	73	16600000	17600000	935	1080	Signal		14.8193	0.657475
0001240_02	700	32	248000	619000	720	516	Signal		0001240_02	800	74	16900000	17800000	1044	859	Signal		14.6746	0.651054
389									gapdh
0001240_02	700	33	392000	844000	735	615	Signal		0001240_02	800	75	23300000	24300000	1098	917	Signal		16.824	1
0001240_02	700	34	395000	836000	784	562	Signal		0001240_02	800	76	22700000	23700000	1083	889	Signal		17.4009	1.03429
0001240_02	700	35	350000	755000	658	615	Signal		0001240_02	800	77	23300000	24300000	1026	968	Signal		15.0215	0.892857
0001240_02	700	36	325000	758000	750	577	Signal		0001240_02	800	78	20900000	22000000	896	1240	Signal		15.5502	0.924287
0001240_02	700	37	270000	653000	637	602	Signal		0001240_02	800	79	18800000	19700000	880	1050	Signal		14.3617	0.853642
0001240_02	700	38	275000	615000	517	657	Signal		0001240_02	800	80	17100000	18000000	832	1100	Signal		16.0819	0.955887
0001240_02	700	39	438000	880000	714	619	Signal		0001240_02	800	81	19000000	20100000	864	1320	Signal		23.0526	1
0001240_02	700	40	524000	955000	672	641	Signal		0001240_02	800	82	22000000	23300000	901	1480	Signal		23.8182	1.03321
0001240_02	700	41	413000	851000	686	639	Signal		0001240_02	800	83	24200000	25500000	918	1400	Signal		17.0661	1
0001240_02	700	42	407000	845000	735	596	Signal		0001240_02	800	84	26100000	27400000	972	1330	Signal		15.5939	0.913733
0001240_02	700	43	325000	773000	705	636	Signal		0001240_02	800	85	26600000	28100000	972	1530	Signal		12.218	0.715924
0001240_02	700	44	300000	747000	768	583	Signal		0001240_02	800	86	24900000	27000000	952	2190	Signal		12.0482	0.705972
0001240_02	700	45	244000	714000	833	564	Signal		0001240_02	800	87	23200000	24800000	969	1720	Signal		10.5172	0.616265
0001240_02	700	46	236000	645000	705	579	Signal		0001240_02	800	88	22500000	23900000	990	1380	Signal		10.4889	0.614603
421									gapdh
0001240_02	700	47	632000	1070000	816	533	Signal		0001240_02	800	89	7480000	7720000	954	245	Signal		84.492	1
0001240_02	700	48	631000	1050000	833	506	Signal		0001240_02	800	90	7510000	7760000	825	309	Signal		84.0213	0.994429
0001240_02	700	49	557000	957000	752	532	Signal		0001240_02	800	91	7170000	7460000	795	368	Signal		77.6848	0.919434
0001240_02	700	50	502000	915000	867	477	Signal		0001240_02	800	92	6300000	6570000	756	349	Signal		79.6825	0.943078
0001240_02	700	51	453000	891000	900	487	Signal		0001240_02	800	93	6470000	6730000	810	319	Signal		70.0155	0.828664
0001240_02	700	52	478000	899000	850	495	Signal		0001240_02	800	94	6230000	6470000	780	305	Signal		76.7255	0.908081
0001240_02	700	53	472000	919000	884	506	Signal		0001240_02	800	95	6100000	6350000	810	313	Signal		77.377	1
0001240_02	700	54	542000	991000	833	539	Signal		0001240_02	800	96	6280000	6540000	810	326	Signal		86.3057	1.11539
0001240_02	700	55	467000	934000	936	499	Signal		0001240_02	800	97	6070000	6300000	795	288	Signal		76.9357	1
0001240_02	700	56	495000	939000	850	522	Signal		0001240_02	800	98	6530000	6810000	728	382	Signal		75.804	0.985289
0001240_02	700	57	519000	948000	816	526	Signal		0001240_02	800	99	6920000	7190000	728	372	Signal		75	0.974839
0001240_02	700	58	463000	853000	784	497	Signal		0001240_02	800	100	7110000	7370000	810	320	Signal		65.1195	0.846415
0001240_02	700	59	452000	896000	882	503	Signal		0001240_02	800	101	7570000	7850000	741	382	Signal		59.7094	0.776094
0001240_02	700	60	454000	879000	816	520	Signal		0001240_02	800	102	7850000	8190000	756	447	Signal		57.8344	0.751723
[truncated: 4 more columns]
