# Supplementary material for: PDZ-directed substrate recruitment is the primary determinant of specific 4E-BP1 dephosphorylation by PP1-Neurabin
Source: eLife journal article supplement (doi:10.7554/elife.103403), 2024-11-20
Supplement: fig3-data3 [file elife-103403-fig3-data3-v1.zip]

## Sheet: Sheet1
2024-06-28
	Area-under-the-curve	normalized -to-noOPP-control	as % of empty vector expression
noOPP	653
Empty (+tet)	5413	4760	100
Neurabin (+tet)	4394	3741	78.5924
No neurabin (-tet)	5333	4680	98.3193
PP1 (+tet)	5560	4907	103.088
2024-07-19
		norm	%
noOPP	94.8
Empty (+tet)	1828	1733.2	100
Neurabin (+tet)	1625	1530.2	88.2876
PP1 (+tet)	1800	1705.2	98.3845
No neurabin (-tet)	1767	1672.2	96.4805
empty-tet+rapa	1293	1198.2	69.1322
2024-07-23
		norm	%
noOPP	211
Empty (+tet)	2831	2620	100
Neurabin (+tet)	2114	1903	72.6336
PP1 (+tet)	2671	2460	93.8931
No neurabin (-tet)	2763	2552	97.4046
empty-tet+rapa	2226	2015	76.9084
2024-07-26
		norm	%
noOPP	337
Empty (+tet)	5416	5079	100
Neurabin (+tet)	5020	4683	92.2032
PP1 (+tet)	6067	5730	112.817
No neurabin (-tet)	5884	5547	109.214
empty-tet+rapa	4489	4152	81.7484
