# Supplementary material for: PDZ-directed substrate recruitment is the primary determinant of specific 4E-BP1 dephosphorylation by PP1-Neurabin
Source: eLife journal article supplement (doi:10.7554/elife.103403), 2024-11-20
Supplement: fig4-data1 [file westerns-bands_quantification.xlsx]

## Sheet: same band quant
Image Name	Channel	Name	Signal	Total	Area	Bkgnd.	Type		Image Name	Channel	Name	Signal	Total	Area	Bkgnd.	Type		Condition	PP1-Neurabin concentration	phospho/total ratio	normalized ratio
0001163_02	700	1	128000	452000	1323	245	Signal		0001163_02	800	2	129000	262000	1323	100	Signal		WT-37	beads	1.00781
0001163_02	700	3	138000	490000	1323	266	Signal		0001163_02	800	4	225000	452000	1323	172	Signal			SN	1.63043
0001163_02	700	5	1540000	2220000	1323	513	Signal		0001163_02	800	6	1960000	3040000	1323	821	Signal			total	1.27273	1.00179
0001163_02	700	7	721000	1200000	1323	363	Signal		0001163_02	800	8	916000	1360000	1323	338	Signal			0	1.27046	1
0001163_02	700	9	558000	1030000	1323	360	Signal		0001163_02	800	10	765000	1090000	1323	247	Signal			0.000152416	1.37097	1.07911
0001163_02	700	11	646000	1120000	1323	362	Signal		0001163_02	800	12	892000	1230000	1323	257	Signal			0.000457247	1.3808	1.08686
0001163_02	700	13	686000	1160000	1323	361	Signal		0001163_02	800	14	888000	1280000	1323	297	Signal			0.00137174	1.29446	1.01889
0001163_02	700	15	767000	1230000	1323	352	Signal		0001163_02	800	16	950000	1330000	1323	289	Signal			0.00411523	1.23859	0.974918
0001163_02	700	17	814000	1290000	1323	361	Signal		0001163_02	800	18	900000	1210000	1323	233	Signal			0.0123457	1.10565	0.870278
0001163_02	700	19	1000000	1470000	1323	352	Signal		0001163_02	800	20	693000	934000	1323	182	Signal			0.037037	0.693	0.545473
0001163_02	700	21	1080000	1500000	1323	314	Signal		0001163_02	800	22	153000	286000	1323	100	Signal			0.111111	0.141667	0.111508
0001163_02	700	23	1330000	1730000	1323	298	Signal		0001163_02	800	24	14500	114000	1323	75	Signal			0.333333	0.0109023	0.00858136
0001163_02	700	25	1720000	2140000	1323	319	Signal		0001163_02	800	26	16600	113000	1323	73	Signal			1	0.00965116	0.0075966
0001163_02	700	27	2390000	2940000	1323	417	Signal		0001163_02	800	28	29000	126000	1323	73	Signal			3	0.0121339	0.0095508
0001163_02	700	29	91300	410000	1323	241	Signal		0001163_02	800	30	225000	440000	1323	162	Signal		118A-37	SN	2.4644
0001163_02	700	31	1160000	1710000	1323	416	Signal		0001163_02	800	32	1380000	2130000	1323	564	Signal			total	1.18966	0.980925
0001163_02	700	33	907000	1350000	1323	336	Signal		0001163_02	800	34	1100000	1550000	1323	338	Signal			0	1.21279	1
0001163_02	700	35	932000	1370000	1323	331	Signal		0001163_02	800	36	1130000	1620000	1323	369	Signal			0.000152416	1.21245	0.999717
0001163_02	700	37	1090000	1550000	1323	353	Signal		0001163_02	800	38	1380000	1910000	1323	398	Signal			0.000457247	1.26606	1.04392
0001163_02	700	39	862000	1330000	1323	352	Signal		0001163_02	800	40	1060000	1510000	1323	340	Signal			0.00137174	1.2297	1.01394
0001163_02	700	41	859000	1330000	1323	356	Signal		0001163_02	800	42	999000	1450000	1323	344	Signal			0.00411523	1.16298	0.95893
0001163_02	700	43	932000	1420000	1323	366	Signal		0001163_02	800	44	1040000	1470000	1323	327	Signal			0.0123457	1.11588	0.920094
0001163_02	700	45	876000	1310000	1323	331	Signal		0001163_02	800	46	887000	1260000	1323	283	Signal			0.037037	1.01256	0.834899
0001163_02	700	47	987000	1440000	1323	346	Signal		0001163_02	800	48	934000	1330000	1323	298	Signal			0.111111	0.946302	0.780269
0001163_02	700	49	957000	1390000	1323	325	Signal		0001163_02	800	50	759000	1060000	1323	226	Signal			0.333333	0.793103	0.65395
0001163_02	700	51	973000	1360000	1323	293	Signal		0001163_02	800	52	446000	654000	1323	157	Signal			1	0.458376	0.377952
0001163_02	700	53	999000	1410000	1323	313	Signal		0001163_02	800	54	95000	223000	1323	97	Signal			3	0.0950951	0.0784102
0001163_02	700	55	123000	445000	1323	243	Signal		0001163_02	800	56	21300	118000	1323	73	Signal		WT-65	beads	0.173171
0001163_02	700	57	177000	536000	1323	272	Signal		0001163_02	800	58	27600	155000	1323	96	Signal			SN	0.155932
0001163_02	700	59	1530000	2210000	1323	512	Signal		0001163_02	800	60	210000	463000	1323	191	Signal			total	0.137255	0.951272
0001163_02	700	61	700000	1130000	1323	327	Signal		0001163_02	800	62	101000	231000	1323	98	Signal			0	0.144286	1
0001163_02	700	63	603000	1010000	1323	310	Signal		0001163_02	800	64	83900	216000	1323	100	Signal			0.000152416	0.139138	0.96432
0001163_02	700	65	682000	1120000	1323	329	Signal		0001163_02	800	66	99000	231000	1323	100	Signal			0.000457247	0.145161	1.00607
0001163_02	700	67	814000	1260000	1323	335	Signal		0001163_02	800	68	116000	258000	1323	107	Signal			0.00137174	0.142506	0.987666
0001163_02	700	69	714000	1140000	1323	325	Signal		0001163_02	800	70	104000	238000	1323	102	Signal			0.00411523	0.145658	1.00951
0001163_02	700	71	721000	1150000	1323	327	Signal		0001163_02	800	72	121000	249000	1323	97	Signal			0.0123457	0.167822	1.16313
0001163_02	700	73	941000	1370000	1323	322	Signal		0001163_02	800	74	73100	190000	1323	88	Signal			0.037037	0.0776833	0.538399
0001163_02	700	75	1030000	1420000	1323	298	Signal		0001163_02	800	76	23500	120000	1323	73	Signal			0.111111	0.0228155	0.158127
0001163_02	700	77	1240000	1670000	1323	321	Signal		0001163_02	800	78	5750	97000	1323	69	Signal			0.333333	0.0046371	0.0321383
0001163_02	700	79	1330000	1800000	1323	354	Signal		0001163_02	800	80	2440	91100	1323	67	Signal			1	0.00183459	0.012715
0001163_02	700	81	1930000	2480000	1323	419	Signal		0001163_02	800	82	3030	91700	1323	67	Signal			3	0.00156995	0.0108808
0001163_02	700	83	229000	579000	1323	264	Signal		0001163_02	800	84	21200	128000	1323	81	Signal		118A-65	SN	0.0925764
0001163_02	700	85	1790000	2520000	1323	550	Signal		0001163_02	800	86	204000	381000	1323	134	Signal			total	0.113966	1.16596
0001163_02	700	87	1330000	1900000	1323	432	Signal		0001163_02	800	88	130000	260000	1323	98	Signal			0	0.0977444	1
0001163_02	700	89	1260000	1830000	1323	435	Signal		0001163_02	800	90	130000	257000	1323	96	Signal			0.000152416	0.103175	1.05556
0001163_02	700	91	1330000	1890000	1323	428	Signal		0001163_02	800	92	145000	274000	1323	98	Signal			0.000457247	0.109023	1.11538
0001163_02	700	93	1220000	1770000	1323	415	Signal		0001163_02	800	94	129000	256000	1323	96	Signal			0.00137174	0.105738	1.08178
0001163_02	700	95	1280000	1860000	1323	438	Signal		0001163_02	800	96	127000	257000	1323	98	Signal			0.00411523	0.0992187	1.01508
0001163_02	700	97	1250000	1820000	1323	430	Signal		0001163_02	800	98	125000	253000	1323	97	Signal			0.0123457	0.1	1.02308
0001163_02	700	99	1260000	1850000	1323	447	Signal		0001163_02	800	100	121000	251000	1323	98	Signal			0.037037	0.0960317	0.982479
0001163_02	700	101	1360000	1970000	1323	459	Signal		0001163_02	800	102	121000	256000	1323	102	Signal			0.111111	0.0889706	0.910238
0001163_02	700	103	1460000	2010000	1323	419	Signal		0001163_02	800	104	116000	238000	1323	92	Signal			0.333333	0.0794521	0.812856
0001163_02	700	105	1900000	2490000	1323	448	Signal		0001163_02	800	106	101000	213000	1323	84.5	Signal			1	0.0531579	0.543846
0001163_02	700	107	2480000	3260000	1323	594	Signal		0001163_02	800	108	62200	159000	1323	73	Signal			3	0.0250806	0.256594
0001163_02	700	109	160000	519000	1323	271	Signal		0001163_02	800	110	30500	147000	1323	88	Signal		WT-70	SN	0.190625
0001163_02	700	111	1760000	2500000	1323	558	Signal		0001163_02	800	112	259000	452000	1323	146	Signal			total	0.147159	1.22055
0001163_02	700	113	846000	1330000	1323	365	Signal		0001163_02	800	114	102000	229000	1323	96	Signal			0	0.120567	1
0001163_02	700	115	708000	1170000	1323	350	Signal		0001163_02	800	116	75000	202000	1323	96	Signal			0.000152416	0.105932	0.878614
0001163_02	700	117	822000	1310000	1323	365	Signal		0001163_02	800	118	83800	211000	1323	96	Signal			0.000457247	0.101946	0.845556
0001163_02	700	119	784000	1260000	1323	361	Signal		0001163_02	800	120	70300	189000	1323	90	Signal			0.00137174	0.0896684	0.74372
0001163_02	700	121	930000	1450000	1323	393	Signal		0001163_02	800	122	58700	173000	1323	86	Signal			0.00411523	0.0631183	0.52351
0001163_02	700	123	1000000	1500000	1323	375	Signal		0001163_02	800	124	20800	125000	1323	79	Signal			0.0123457	0.0208	0.172518
0001163_02	700	125	1160000	1620000	1323	348	Signal		0001163_02	800	126	4360	101000	1323	73	Signal			0.037037	0.00375862	0.0311744
0001163_02	700	127	1570000	2030000	1323	343	Signal		0001163_02	800	128	-649	98600	1323	75	Signal			0.111111	-0.000413376	-0.00342859
0001163_02	700	129	1500000	1980000	1323	363	Signal		0001163_02	800	130	1920	98500	1323	73	Signal			0.333333	0.00128	0.0106165
0001163_02	700	131	1730000	2250000	1323	396	Signal		0001163_02	800	132	-732	98500	1323	75	Signal			1	-0.000423121	-0.00350942
0001163_02	700	133	2150000	2760000	1323	459	Signal		0001163_02	800	134	1080	100000	1323	75	Signal			3	0.000502326	0.00416635
0001163_02	700	135	83500	352000	1323	203	Signal		0001163_02	800	136	6780	117000	1323	83	Signal		118A-70	SN	0.0811976
0001163_02	700	137	667000	1070000	1323	304	Signal		0001163_02	800	138	55600	200000	1323	109	Signal			total	0.0833583	1.09369
0001163_02	700	139	534000	891000	1323	270	Signal		0001163_02	800	140	40700	168000	1323	96	Signal			0	0.0762172	1
0001163_02	700	141	540000	892000	1323	266	Signal		0001163_02	800	142	41300	166000	1323	94	Signal			0.152416	0.0764815	1.00347
0001163_02	700	143	565000	907000	1323	258	Signal		0001163_02	800	144	44700	169000	1323	94	Signal			0.457247	0.079115	1.03802
0001163_02	700	145	525000	867000	1323	258	Signal		0001163_02	800	146	36400	161000	1323	94	Signal			1.37174	0.0693333	0.909681
0001163_02	700	147	489000	813000	1323	245	Signal		0001163_02	800	148	31600	153000	1323	92	Signal			4.11523	0.0646217	0.847862
0001163_02	700	149	416000	730000	1323	237	Signal		0001163_02	800	150	24500	141000	1323	88	Signal			12.3457	0.0588942	0.772715
0001163_02	700	151	493000	832000	1323	256	Signal		0001163_02	800	152	26700	140000	1323	86	Signal			37.037	0.0541582	0.710577
0001163_02	700	153	538000	864000	1323	247	Signal		0001163_02	800	154	19000	129000	1323	83	Signal			111.111	0.035316	0.46336
0001163_02	700	155	648000	992000	1323	260	Signal		0001163_02	800	156	6530	114000	1323	81	Signal			333.333	0.0100772	0.132216
0001163_02	700	157	772000	1120000	1323	266	Signal		0001163_02	800	158	-613	104000	1323	79	Signal			1000	-0.000794041	-0.0104181
0001163_02	700	159	816000	1200000	1323	290	Signal		0001163_02	800	160	-1250	103000	1323	79	Signal			3000	-0.00153186	-0.0200986

## Sheet: top phospho band
Image Name	Channel	Name	Signal	Total	Area	Bkgnd.	Type		Image Name	Channel	Name	Signal	Total	Area	Bkgnd.	Type								Image Name	Channel	Name	Signal	Total	Area	Bkgnd.	Type
0001163_02	700	1	128000	452000	1323	245	Signal		0001163_02	800	161	371000	469000	882	111	Signal		WT-37	beads	2.89844				0001163_02	800	161	371000	469000	882	111	Signal
0001163_02	700	3	138000	490000	1323	266	Signal		0001163_02	800	162	166000	261000	882	107	Signal			SN	1.2029				0001163_02	800	162	166000	261000	882	107	Signal
0001163_02	700	5	1540000	2220000	1323	513	Signal		0001163_02	800	163	1250000	1420000	882	197	Signal			total	0.811688	0.157319			0001163_02	800	163	1250000	1420000	882	197	Signal
0001163_02	700	7	721000	1200000	1323	363	Signal		0001163_02	800	164	3720000	3990000	882	305	Signal			0	5.1595	1			0001163_02	800	164	3720000	3990000	882	305	Signal
0001163_02	700	9	558000	1030000	1323	360	Signal		0001163_02	800	165	3840000	4250000	882	465	Signal			0.000152416	6.88172	1.3338			0001163_02	800	165	3840000	4250000	882	465	Signal
0001163_02	700	11	646000	1120000	1323	362	Signal		0001163_02	800	166	3640000	3970000	882	374	Signal			0.000457247	5.63467	1.0921			0001163_02	800	166	3640000	3970000	882	374	Signal
0001163_02	700	13	686000	1160000	1323	361	Signal		0001163_02	800	167	2900000	3220000	882	362	Signal			0.00137174	4.22741	0.819344			0001163_02	800	167	2900000	3220000	882	362	Signal
0001163_02	700	15	767000	1230000	1323	352	Signal		0001163_02	800	168	2990000	3250000	882	300	Signal			0.00411523	3.89831	0.755559			0001163_02	800	168	2990000	3250000	882	300	Signal
0001163_02	700	17	814000	1290000	1323	361	Signal		0001163_02	800	169	1930000	2140000	882	237	Signal			0.0123457	2.37101	0.459542			0001163_02	800	169	1930000	2140000	882	237	Signal
0001163_02	700	19	1000000	1470000	1323	352	Signal		0001163_02	800	170	1610000	1780000	882	192	Signal			0.037037	1.61	0.312046			0001163_02	800	170	1610000	1780000	882	192	Signal
0001163_02	700	21	1080000	1500000	1323	314	Signal		0001163_02	800	171	613000	714000	882	115	Signal			0.111111	0.567593	0.110009			0001163_02	800	171	613000	714000	882	115	Signal
0001163_02	700	23	1330000	1730000	1323	298	Signal		0001163_02	800	172	294000	374000	882	90	Signal			0.333333	0.221053	0.0428438			0001163_02	800	172	294000	374000	882	90	Signal
0001163_02	700	25	1720000	2140000	1323	319	Signal		0001163_02	800	173	282000	358000	882	86	Signal			1	0.163953	0.031777			0001163_02	800	173	282000	358000	882	86	Signal
0001163_02	700	27	2390000	2940000	1323	417	Signal		0001163_02	800	174	134000	202000	882	77	Signal			3	0.0560669	0.0108667			0001163_02	800	174	134000	202000	882	77	Signal
																								0001163_02	800	175	76600	160000	882	95	Signal
0001163_02	700	29	91300	410000	1323	241	Signal		0001163_02	800	175	76600	160000	882	95	Signal		118A-37	SN	0.838992				0001163_02	800	176	754000	932000	882	202	Signal
0001163_02	700	31	1160000	1710000	1323	416	Signal		0001163_02	800	176	754000	932000	882	202	Signal			total	0.65	0.320408			0001163_02	800	177	1840000	2100000	882	289	Signal
0001163_02	700	33	907000	1350000	1323	336	Signal		0001163_02	800	177	1840000	2100000	882	289	Signal			0	2.02867	1			0001163_02	800	178	2290000	2610000	882	368	Signal
0001163_02	700	35	932000	1370000	1323	331	Signal		0001163_02	800	178	2290000	2610000	882	368	Signal			0.000152416	2.45708	1.21118			0001163_02	800	179	2480000	2800000	882	364	Signal
0001163_02	700	37	1090000	1550000	1323	353	Signal		0001163_02	800	179	2480000	2800000	882	364	Signal			0.000457247	2.27523	1.12154			0001163_02	800	180	2240000	2560000	882	366	Signal
0001163_02	700	39	862000	1330000	1323	352	Signal		0001163_02	800	180	2240000	2560000	882	366	Signal			0.00137174	2.59861	1.28094			0001163_02	800	181	1960000	2280000	882	354	Signal
0001163_02	700	41	859000	1330000	1323	356	Signal		0001163_02	800	181	1960000	2280000	882	354	Signal			0.00411523	2.28172	1.12474			0001163_02	800	182	2010000	2250000	882	275	Signal
0001163_02	700	43	932000	1420000	1323	366	Signal		0001163_02	800	182	2010000	2250000	882	275	Signal			0.0123457	2.15665	1.06309			0001163_02	800	183	1290000	1550000	882	301	Signal
0001163_02	700	45	876000	1310000	1323	331	Signal		0001163_02	800	183	1290000	1550000	882	301	Signal			0.037037	1.4726	0.725897			0001163_02	800	184	1280000	1520000	882	275	Signal
0001163_02	700	47	987000	1440000	1323	346	Signal		0001163_02	800	184	1280000	1520000	882	275	Signal			0.111111	1.29686	0.639267			0001163_02	800	185	757000	902000	882	164	Signal
0001163_02	700	49	957000	1390000	1323	325	Signal		0001163_02	800	185	757000	902000	882	164	Signal			0.333333	0.791014	0.389918			0001163_02	800	186	414000	529000	882	130	Signal
0001163_02	700	51	973000	1360000	1323	293	Signal		0001163_02	800	186	414000	529000	882	130	Signal			1	0.425488	0.209738			0001163_02	800	187	226000	307000	882	92	Signal
0001163_02	700	53	999000	1410000	1323	313	Signal		0001163_02	800	187	226000	307000	882	92	Signal			3	0.226226	0.111515			0001163_02	800	188	45800	110000	882	73	Signal
																								0001163_02	800	189	25500	89800	882	73	Signal
0001163_02	700	55	123000	445000	1323	243	Signal		0001163_02	800	188	45800	110000	882	73	Signal		WT-65	beads	0.372358				0001163_02	800	190	132000	209000	882	88	Signal
0001163_02	700	57	177000	536000	1323	272	Signal		0001163_02	800	189	25500	89800	882	73	Signal			SN	0.144068				0001163_02	800	191	279000	366000	882	98	Signal
0001163_02	700	59	1530000	2210000	1323	512	Signal		0001163_02	800	190	132000	209000	882	88	Signal			total	0.0862745	0.216459			0001163_02	800	192	467000	561000	882	107	Signal
0001163_02	700	61	700000	1130000	1323	327	Signal		0001163_02	800	191	279000	366000	882	98	Signal			0	0.398571	1			0001163_02	800	193	415000	513000	882	111	Signal
0001163_02	700	63	603000	1010000	1323	310	Signal		0001163_02	800	192	467000	561000	882	107	Signal			0.000152416	0.774461	1.94309			0001163_02	800	194	345000	441000	882	109	Signal
0001163_02	700	65	682000	1120000	1323	329	Signal		0001163_02	800	193	415000	513000	882	111	Signal			0.000457247	0.608504	1.52671			0001163_02	800	195	298000	389000	882	104	Signal
0001163_02	700	67	814000	1260000	1323	335	Signal		0001163_02	800	194	345000	441000	882	109	Signal			0.00137174	0.423833	1.06338			0001163_02	800	196	163000	247000	882	96	Signal
0001163_02	700	69	714000	1140000	1323	325	Signal		0001163_02	800	195	298000	389000	882	104	Signal			0.00411523	0.417367	1.04716			0001163_02	800	197	111000	184000	882	83	Signal
0001163_02	700	71	721000	1150000	1323	327	Signal		0001163_02	800	196	163000	247000	882	96	Signal			0.0123457	0.226075	0.567213			0001163_02	800	198	42900	109000	882	75	Signal
0001163_02	700	73	941000	1370000	1323	322	Signal		0001163_02	800	197	111000	184000	882	83	Signal			0.037037	0.11796	0.295956			0001163_02	800	199	31300	93900	882	71	Signal
0001163_02	700	75	1030000	1420000	1323	298	Signal		0001163_02	800	198	42900	109000	882	75	Signal			0.111111	0.0416505	0.104499			0001163_02	800	200	14000	75700	882	70	Signal
0001163_02	700	77	1240000	1670000	1323	321	Signal		0001163_02	800	199	31300	93900	882	71	Signal			0.333333	0.0252419	0.063331			0001163_02	800	201	34100	95000	882	69	Signal
0001163_02	700	79	1330000	1800000	1323	354	Signal		0001163_02	800	200	14000	75700	882	70	Signal			1	0.0105263	0.0264101			0001163_02	800	202	18900	81600	882	71	Signal
0001163_02	700	81	1930000	2480000	1323	419	Signal		0001163_02	800	201	34100	95000	882	69	Signal			3	0.0176684	0.0443293			0001163_02	800	203	101000	184000	882	94	Signal
																								0001163_02	800	204	217000	303000	882	98	Signal
0001163_02	700	83	229000	579000	1323	264	Signal		0001163_02	800	202	18900	81600	882	71	Signal		118A-65	SN	0.0825328				0001163_02	800	205	245000	335000	882	102	Signal
0001163_02	700	85	1790000	2520000	1323	550	Signal		0001163_02	800	203	101000	184000	882	94	Signal			total	0.0564246	0.345828			0001163_02	800	206	174000	258000	882	95	Signal
0001163_02	700	87	1330000	1900000	1323	432	Signal		0001163_02	800	204	217000	303000	882	98	Signal			0	0.163158	1			0001163_02	800	207	230000	319000	882	100	Signal
0001163_02	700	89	1260000	1830000	1323	435	Signal		0001163_02	800	205	245000	335000	882	102	Signal			0.000152416	0.194444	1.19176			0001163_02	800	208	192000	279000	882	98	Signal
0001163_02	700	91	1330000	1890000	1323	428	Signal		0001163_02	800	206	174000	258000	882	95	Signal			0.000457247	0.130827	0.801843			0001163_02	800	209	147000	228000	882	92	Signal
0001163_02	700	93	1220000	1770000	1323	415	Signal		0001163_02	800	207	230000	319000	882	100	Signal			0.00137174	0.188525	1.15547			0001163_02	800	210	169000	246000	882	88	Signal
0001163_02	700	95	1280000	1860000	1323	438	Signal		0001163_02	800	208	192000	279000	882	98	Signal			0.00411523	0.15	0.919355			0001163_02	800	211	123000	199000	882	86	Signal
0001163_02	700	97	1250000	1820000	1323	430	Signal		0001163_02	800	209	147000	228000	882	92	Signal			0.0123457	0.1176	0.720774			0001163_02	800	212	87300	157000	882	79	Signal
0001163_02	700	99	1260000	1850000	1323	447	Signal		0001163_02	800	210	169000	246000	882	88	Signal			0.037037	0.134127	0.822069			0001163_02	800	213	61100	125000	882	73	Signal
0001163_02	700	101	1360000	1970000	1323	459	Signal		0001163_02	800	211	123000	199000	882	86	Signal			0.111111	0.0904412	0.554317			0001163_02	800	214	35900	96800	882	69	Signal
0001163_02	700	103	1460000	2010000	1323	419	Signal		0001163_02	800	212	87300	157000	882	79	Signal			0.333333	0.0597945	0.366483			0001163_02	800	215	7830	81000	882	83	Signal
0001163_02	700	105	1900000	2490000	1323	448	Signal		0001163_02	800	213	61100	125000	882	73	Signal			1	0.0321579	0.197097			0001163_02	800	216	94500	183000	882	100	Signal
0001163_02	700	107	2480000	3260000	1323	594	Signal		0001163_02	800	214	35900	96800	882	69	Signal			3	0.0144758	0.0887227			0001163_02	800	217	498000	595000	882	110	Signal
																								0001163_02	800	218	658000	754000	882	109	Signal
0001163_02	700	109	160000	519000	1323	271	Signal		0001163_02	800	215	7830	81000	882	83	Signal		WT-70	SN	0.0489375				0001163_02	800	219	637000	733000	882	109	Signal
0001163_02	700	111	1760000	2500000	1323	558	Signal		0001163_02	800	216	94500	183000	882	100	Signal			total	0.0536932	0.0912137			0001163_02	800	220	390000	476000	882	98	Signal
0001163_02	700	113	846000	1330000	1323	365	Signal		0001163_02	800	217	498000	595000	882	110	Signal			0	0.588652	1			0001163_02	800	221	395000	480000	882	96	Signal
0001163_02	700	115	708000	1170000	1323	350	Signal		0001163_02	800	218	658000	754000	882	109	Signal			0.000152416	0.929379	1.57882			0001163_02	800	222	170000	243000	882	83	Signal
0001163_02	700	117	822000	1310000	1323	365	Signal		0001163_02	800	219	637000	733000	882	109	Signal			0.000457247	0.774939	1.31646			0001163_02	800	223	11900	78100	882	75	Signal
0001163_02	700	119	784000	1260000	1323	361	Signal		0001163_02	800	220	390000	476000	882	98	Signal			0.00137174	0.497449	0.845064			0001163_02	800	224	4940	71100	882	75	Signal
0001163_02	700	121	930000	1450000	1323	393	Signal		0001163_02	800	221	395000	480000	882	96	Signal			0.00411523	0.424731	0.721531			0001163_02	800	225	2370	68500	882	75	Signal
0001163_02	700	123	1000000	1500000	1323	375	Signal		0001163_02	800	222	170000	243000	882	83	Signal			0.0123457	0.17	0.288795			0001163_02	800	226	80	66200	882	75	Signal
0001163_02	700	125	1160000	1620000	1323	348	Signal		0001163_02	800	223	11900	78100	882	75	Signal			0.037037	0.0102586	0.0174273			0001163_02	800	227	3040	67400	882	73	Signal
0001163_02	700	127	1570000	2030000	1323	343	Signal		0001163_02	800	224	4940	71100	882	75	Signal			0.111111	0.0031465	0.00534525			0001163_02	800	228	3140	76300	882	83	Signal
0001163_02	700	129	1500000	1980000	1323	363	Signal		0001163_02	800	225	2370	68500	882	75	Signal			0.333333	0.00158	0.0026841			0001163_02	800	229	33100	112000	882	89	Signal
0001163_02	700	131	1730000	2250000	1323	396	Signal		0001163_02	800	226	80	66200	882	75	Signal			1	4.62428e-05	7.8557e-05			0001163_02	800	230	90800	175000	882	96	Signal
0001163_02	700	133	2150000	2760000	1323	459	Signal		0001163_02	800	227	3040	67400	882	73	Signal			3	0.00141395	0.00240202			0001163_02	800	231	111000	198000	882	98	Signal
																								0001163_02	800	232	94700	179000	882	96	Signal
0001163_02	700	135	83500	352000	1323	203	Signal		0001163_02	800	228	3140	76300	882	83	Signal		118A-70	SN	0.0376048				0001163_02	800	233	62300	147000	882	96	Signal
0001163_02	700	137	667000	1070000	1323	304	Signal		0001163_02	800	229	33100	112000	882	89	Signal			total	0.0496252	0.291849			0001163_02	800	234	79800	166000	882	98	Signal
0001163_02	700	139	534000	891000	1323	270	Signal		0001163_02	800	230	90800	175000	882	96	Signal			0	0.170037	1			0001163_02	800	235	48400	133000	882	96	Signal
0001163_02	700	141	540000	892000	1323	266	Signal		0001163_02	800	231	111000	198000	882	98	Signal			0.152416	0.205556	1.20888			0001163_02	800	236	31200	114000	882	94	Signal
0001163_02	700	143	565000	907000	1323	258	Signal		0001163_02	800	232	94700	179000	882	96	Signal			0.457247	0.167611	0.985728			0001163_02	800	237	19900	99200	882	90	Signal
0001163_02	700	145	525000	867000	1323	258	Signal		0001163_02	800	233	62300	147000	882	96	Signal			1.37174	0.118667	0.697885			0001163_02	800	238	6400	82200	882	86	Signal
0001163_02	700	147	489000	813000	1323	245	Signal		0001163_02	800	234	79800	166000	882	98	Signal			4.11523	0.16319	0.959731			0001163_02	800	239	1310	72700	882	81	Signal
0001163_02	700	149	416000	730000	1323	237	Signal		0001163_02	800	235	48400	133000	882	96	Signal			12.3457	0.116346	0.684238			0001163_02	800	240	1170	70800	882	79	Signal
0001163_02	700	151	493000	832000	1323	256	Signal		0001163_02	800	236	31200	114000	882	94	Signal			37.037	0.063286	0.372189
0001163_02	700	153	538000	864000	1323	247	Signal		0001163_02	800	237	19900	99200	882	90	Signal			111.111	0.0369888	0.217534
0001163_02	700	155	648000	992000	1323	260	Signal		0001163_02	800	238	6400	82200	882	86	Signal			333.333	0.00987654	0.0580845
0001163_02	700	157	772000	1120000	1323	266	Signal		0001163_02	800	239	1310	72700	882	81	Signal			1000	0.00169689	0.00997951
0001163_02	700	159	816000	1200000	1323	290	Signal		0001163_02	800	240	1170	70800	882	79	Signal			3000	0.00143382	0.0084324
