# Supplementary material for: PDZ-directed substrate recruitment is the primary determinant of specific 4E-BP1 dephosphorylation by PP1-Neurabin
Source: eLife journal article supplement (doi:10.7554/elife.103403), 2024-11-20
Supplement: fig4-data3 [file 231205-assay1-rep3.xlsx]

## Sheet: End point
Well Row	Well Col	Content	Raw Data (parallel)	Raw Data (perpendicular)	Polarization based on Raw Data (F: 482-16 / F: 530-40)
A	1	Sample X1	25930	20919	107	73.9435		73.9435	75.5232
A	2	Sample X2	28272	22707	109.2	75.5232		71.6093	70.6937
A	3	Sample X3	29375	23855	103.7	71.6093		70.3306	66.8691
A	4	Sample X4	34320	27943	102.4	70.6937		67.5229	59.2264
A	5	Sample X5	33540	27336	101.9	70.3306		64.6828	51.7788
A	6	Sample X6	34593	28472	97.1	66.8691		60.6239	38.9398
A	7	Sample X7	32639	26814	98	67.5229		52.9964	27.1889
A	8	Sample X8	33696	28343	86.3	59.2264		43.1828	20.4777
A	9	Sample X9	35118	29084	94	64.6828		33.2555	14.9394
A	10	Sample X10	35827	30784	75.7	51.7788		23.4195	11.9634
A	11	Sample X11	40640	34048	88.3	60.6239		17.3852	11.3702
A	12	Sample X12	46605	41554	57.3	38.9398		9.45418	9.97637
A	13	Sample X13	17391	14891	77.4	52.9964
A	14	Sample X14	17425	16077	40.2	27.1889
A	15	Sample X15	15824	13937	63.4	43.1828
A	16	Sample X16	17402	16375	30.4	20.4777
A	17	Sample X17	19937	18072	49.1	33.2555
A	18	Sample X18	20796	19891	22.2	14.9394
A	19	Sample X19	22305	20808	34.7	23.4195
A	20	Sample X20	23822	22987	17.8	11.9634
A	21	Sample X21	26427	25095	25.9	17.3852
A	22	Sample X22	26565	25679	17	11.3702
A	23	Sample X23	26620	25879	14.1	9.45418
A	24	Sample X24	38850	37710	14.9	9.97637
B	1	Sample X25	25167	24383	15.8	10.6042		10.6042	8.42779
B	2	Sample X26	25418	24786	12.6	8.42779		9.84406	7.95676
B	3	Sample X27	22167	21525	14.7	9.84406		7.55348	7.16383
B	4	Sample X28	27068	26432	11.9	7.95676		6.4715	6.5008
B	5	Sample X29	27729	27110	11.3	7.55348		6.94183	6.76979
B	6	Sample X30	28790	28180	10.7	7.16383		7.14667	6.6038
B	7	Sample X31	28696	28146	9.7	6.4715		6.42395	8.22935
B	8	Sample X32	30646	30056	9.7	6.5008		6.68977	7.60568
B	9	Sample X33	32278	31615	10.4	6.94183		7.94393	6.68206
B	10	Sample X34	28895	28316	10.1	6.76979		8.18744	7.67623
B	11	Sample X35	30372	29730	10.7	7.14667		6.62272	7.80446
B	12	Sample X36	39789	39011	9.9	6.6038		7.93626	7.06621
B	13	Sample X37	24491	24025	9.6	6.42395
B	14	Sample X38	25362	24746	12.3	8.22935
B	15	Sample X39	25348	24846	10	6.68977
B	16	Sample X40	27764	27140	11.4	7.60568
B	17	Sample X41	28262	27599	11.9	7.94393
B	18	Sample X42	31898	31267	10	6.68206
B	19	Sample X43	31407	30648	12.2	8.18744
B	20	Sample X44	31084	30379	11.5	7.67623
B	21	Sample X45	32945	32299	9.9	6.62272
B	22	Sample X46	33227	32461	11.7	7.80446
B	23	Sample X47	33025	32251	11.9	7.93626
B	24	Sample X48	45304	44357	10.6	7.06621
C	1	Sample X49	18231	14300	120.8	83.9401		83.9401	61.6301
C	2	Sample X50	19854	16586	89.7	61.6301		72.5381	45.342
C	3	Sample X51	22237	18011	105	72.5381		59.7151	33.5592
C	4	Sample X52	26436	23139	66.5	45.342		43.5849	24.7226
C	5	Sample X53	28338	23803	87	59.7151		33.6117	20.1335
C	6	Sample X54	27198	24632	49.5	33.5592		24.9335	17.655
C	7	Sample X55	27039	23787	64	43.5849		20.7362	13.6075
C	8	Sample X56	27903	25931	36.6	24.7226		17.048	14.3719
C	9	Sample X57	27772	25148	49.6	33.6117		15.8994	14.4642
C	10	Sample X58	27901	26281	29.9	20.1335		14.7901	14.0426
C	11	Sample X59	28815	26762	36.9	24.9335		14.0904	11.92
C	12	Sample X60	34481	32717	26.3	17.655		12.9433	12.3357
C	13	Sample X61	9007	8469	30.8	20.7362
C	14	Sample X62	11273	10825	20.3	13.6075
C	15	Sample X63	12172	11570	25.4	17.048
C	16	Sample X64	14841	14219	21.4	14.3719
C	17	Sample X65	16743	15969	23.7	15.8994
C	18	Sample X66	18614	17829	21.5	14.4642
C	19	Sample X67	18749	17941	22	14.7901
C	20	Sample X68	19572	18770	20.9	14.0426
C	21	Sample X69	20310	19475	21	14.0904
C	22	Sample X70	20328	19618	17.8	11.92
C	23	Sample X71	20634	19853	19.3	12.9433
C	24	Sample X72	31565	30425	18.4	12.3357
D	1	Sample X73	16932	13590	109.5	75.7617		75.7617	78.5557
D	2	Sample X74	16846	13415	113.4	78.5557		64.6112	61.4397
D	3	Sample X75	15578	12904	93.9	64.6112		50.3418	42.9407
D	4	Sample X76	18599	15546	89.4	61.4397		39.0779	31.7374
D	5	Sample X77	19051	16437	73.7	50.3418		28.4528	21.8809
D	6	Sample X78	21461	18915	63.1	42.9407		21.9473	18.5664
D	7	Sample X79	21327	19008	57.5	39.0779		17.9646	15.6962
D	8	Sample X80	23389	21295	46.9	31.7374		17.2387	14.3404
D	9	Sample X81	23922	21990	42.1	28.4528		14.6928	13.7327
D	10	Sample X82	25934	24303	32.5	21.8809		14.714	13.2178
D	11	Sample X83	29220	27377	32.6	21.9473		13.9962	12.3901
D	12	Sample X84	38637	36562	27.6	18.5664		14.012	11.8451
D	13	Sample X85	18818	17839	26.7	17.9646
D	14	Sample X86	20370	19440	23.4	15.6962
D	15	Sample X87	20183	19174	25.6	17.2387
D	16	Sample X88	20946	20070	21.4	14.3404
D	17	Sample X89	25105	24030	21.9	14.6928
D	18	Sample X90	28057	26932	20.5	13.7327
D	19	Sample X91	26609	25468	21.9	14.714
D	20	Sample X92	27257	26204	19.7	13.2178
D	21	Sample X93	26735	25643	20.8	13.9962
D	22	Sample X94	26853	25879	18.5	12.3901
D	23	Sample X95	27146	26036	20.9	14.012
D	24	Sample X96	36269	35010	17.7	11.8451
E	1	Sample X97	30784	27059	64.4	43.8741		43.8741	23.9548
E	2	Sample X98	30403	28318	35.5	23.9548		28.5785	15.7018
E	3	Sample X99	31344	28802	42.3	28.5785		21.7194	9.68264
E	4	Sample X100	37989	36254	23.4	15.7018		14.4929	7.98722
E	5	Sample X101	39186	36739	32.2	21.7194		10.8416	7.27839
E	6	Sample X102	34882	33888	14.5	9.68264		9.48642	7.2323
E	7	Sample X103	41014	39281	21.6	14.4929		8.01547	8.12328
E	8	Sample X104	35404	34569	11.9	7.98722		7.90802	7.37608
E	9	Sample X105	40679	39384	16.2	10.8416		6.88949	6.49712
E	10	Sample X106	40424	39554	10.9	7.27839		6.57342	7.49005
E	11	Sample X107	41784	40617	14.2	9.48642		7.26172	6.25999
E	12	Sample X108	54845	53672	10.8	7.2323		6.40196	6.68539
E	13	Sample X109	14366	14026	12	8.01547
E	14	Sample X110	17014	16606	12.1	8.12328
E	15	Sample X111	16699	16309	11.8	7.90802
E	16	Sample X112	19673	19244	11	7.37608
E	17	Sample X113	22759	22295	10.3	6.88949
E	18	Sample X114	27285	26760	9.7	6.49712
E	19	Sample X115	28154	27606	9.8	6.57342
E	20	Sample X116	30264	29594	11.2	7.49005
E	21	Sample X117	30503	29848	10.9	7.26172
E	22	Sample X118	30408	29844	9.4	6.25999
E	23	Sample X119	30533	29954	9.6	6.40196
E	24	Sample X120	43655	42791	10	6.68539
F	1	Sample X121	27792	25518	42.7	28.8476		28.8476	14.4115
F	2	Sample X122	27342	26193	21.5	14.4115		18.1336	10.7578
F	3	Sample X123	30097	28517	27	18.1336		12.3938	8.47313
F	4	Sample X124	35545	34422	16.1	10.7578		9.88086	5.70155
F	5	Sample X125	34342	33096	18.5	12.3938		8.70463	7.04467
F	6	Sample X126	35766	34872	12.7	8.47313		6.85403	5.14039
F	7	Sample X127	35950	34905	14.7	9.88086		6.8075	5.583
F	8	Sample X128	34946	34355	8.5	5.70155		6.69676	7.06357
F	9	Sample X129	37441	36480	13	8.70463		6.7009	6.62869
F	10	Sample X130	35460	34721	10.5	7.04467		6.66984	5.61831
F	11	Sample X131	36827	36080	10.2	6.85403		6.93068	6.18823
F	12	Sample X132	46645	45933	7.7	5.14039		6.37745	6.40022
F	13	Sample X133	25511	24997	10.2	6.8075
F	14	Sample X134	25175	24758	8.4	5.583
F	15	Sample X135	24767	24276	10	6.69676
F	16	Sample X136	28475	27880	10.6	7.06357
F	17	Sample X137	29541	28955	10	6.7009
F	18	Sample X138	32610	31970	9.9	6.62869
F	19	Sample X139	32614	31970	10	6.66984
F	20	Sample X140	33898	33333	8.4	5.61831
F	21	Sample X141	33597	32908	10.4	6.93068
F	22	Sample X142	35337	34689	9.3	6.18823
F	23	Sample X143	32978	32355	9.5	6.37745
F	24	Sample X144	43359	42537	9.6	6.40022
G	1	Sample X145	27588	25992	29.8	20.0573		20.0573	12.3067
G	2	Sample X146	34163	32932	18.3	12.3067		13.0234	7.85306
G	3	Sample X147	35243	33901	19.4	13.0234		9.95669	7.73591
G	4	Sample X148	40828	39881	11.7	7.85306		7.25101	6.8742
G	5	Sample X149	40974	39774	14.9	9.95669		6.8502	6.2165
G	6	Sample X150	41743	40789	11.6	7.73591		6.8331	6.81576
G	7	Sample X151	41274	40389	10.8	7.25101		8.02798	7.26912
G	8	Sample X152	42226	41367	10.3	6.8742		6.90941	7.6801
G	9	Sample X153	41780	40933	10.2	6.8502		7.03667	0
G	10	Sample X154	41747	40978	9.3	6.2165		6.18528	6.57447
G	11	Sample X155	43960	43071	10.2	6.8331		6.58646	6.89989
G	12	Sample X156	51655	50613	10.2	6.81576		6.60141	6.25152
G	13	Sample X157	13458	13139	12	8.02798
G	14	Sample X158	14329	14021	10.9	7.26912
G	15	Sample X159	14135	13846	10.3	6.90941
G	16	Sample X160	15997	15634	11.5	7.6801
G	17	Sample X161	28150	27564	10.5	7.03667
G	18	Sample X162	40	31	126.8
G	19	Sample X163	21605	21209	9.2	6.18528
G	20	Sample X164	23321	22867	9.8	6.57447
G	21	Sample X165	25125	24635	9.8	6.58646
G	22	Sample X166	25125	24612	10.3	6.89989
G	23	Sample X167	26706	26184	9.9	6.60141
G	24	Sample X168	41732	40959	9.3	6.25152
H	1	Sample X169	18998	16705	64.2	43.7529		43.7529	19.8731
H	2	Sample X170	21137	19925	29.5	19.8731		28.3509	14.3818
H	3	Sample X171	23407	21523	41.9	28.3509		19.6816	10.7493
H	4	Sample X172	29209	27984	21.4	14.3818		14.1858	9.66294
H	5	Sample X173	31386	29603	29.2	19.6816		10.5112	10.203
H	6	Sample X174	29966	29020	16	10.7493		9.19681	9.41969
H	7	Sample X175	27644	26500	21.1	14.1858		10.0756	8.6761
H	8	Sample X176	29818	28970	14.4	9.66294		9.57165	9.6123
H	9	Sample X177	32379	31379	15.7	10.5112		10.5067	10.2078
H	10	Sample X178	35437	34374	15.2	10.203		9.60426	9.08157
H	11	Sample X179	43186	42016	13.7	9.19681		9.2332	8.63117
H	12	Sample X180	53864	52370	14.1	9.41969		7.9373	8.34752
H	13	Sample X181	14310	13886	15	10.0756
H	14	Sample X182	14931	14549	13	8.6761
H	15	Sample X183	15013	14590	14.3	9.57165
H	16	Sample X184	16930	16451	14.3	9.6123
H	17	Sample X185	18075	17517	15.7	10.5067
H	18	Sample X186	20326	19716	15.2	10.2078
H	19	Sample X187	20269	19696	14.3	9.60426
H	20	Sample X188	22460	21859	13.6	9.08157
H	21	Sample X189	23164	22534	13.8	9.2332
H	22	Sample X190	24829	24197	12.9	8.63117
H	23	Sample X191	27304	26664	11.9	7.9373
H	24	Sample X192	37026	36114	12.5	8.34752
