# Supplementary material for: PDZ-directed substrate recruitment is the primary determinant of specific 4E-BP1 dephosphorylation by PP1-Neurabin
Source: eLife journal article supplement (doi:10.7554/elife.103403), 2024-11-20
Supplement: fig4-data3 [file 231205-assay2-repAB.xlsx]

## Sheet: End point
Well Row	Well Col	Content	Raw Data (parallel)	Raw Data (perpendicular)	Polarization based on Raw Data (F: 482-16 / F: 530-40)			4ebp				sgs				s6k				kalirin-7				nr1-1				nr2a/b				glur1				glur2				4ebp				sgs				s6k
A	1	Sample X1	52609	41848	113.9	78.9479		78.9479	92.3077	82.3277	84.2684	18.451	17.8274	13.2103	14.2709	76.6658	90.2893	91.0128	91.8528	81.1422	82.0532	82.9523	81.8592	47.9775	49.2128	48.7419	48.4731	35.348	36.4631	33.872	30.7251	26.2172	26.3269	24.8004	23.7905	51.5403	51.1642	49.7946	49.7784	81.322	83.0158	85.5552	86.6917	15.933	15.3954	16.0349	16.0182	70.0589	69.6771
A	2	Sample X2	46741	36933	117.2	81.322		79.6619	80.0282	82.0187	81.7493	15.5839	16.9209	13.9851	15.471	66.5113	79.4003	80.9855	78.5951	69.811	71.6395	70.8055	71.4918	36.7979	36.4299	36.1394	36.8807	24.7628	24.892	21.1162	24.4046	20.3801	19.4365	19.4013	18.7485	36.2566	36.4054	36.2963	36.1591	79.8823	82.3154	81.7642	83.1502	15.0397	14.4334	56.9527	14.5252	55.1217	55.0143
A	3	Sample X3	60206	47795	114.9	79.6619		77.5526	78.2868	77.604	78.1328	15.2781	15.948	13.3596	14.3853	68.6893	68.5942	67.3209	66.5612	60.236	60.0984	59.3076	58.2794	28.9745	30.0952	28.0278	26.7699	21.5689	21.701	20.2667	19.7088	18.8668	17.6939	16.9594	16.8452	29.5108	27.9501	27.9485	27.3607	73.1025	74.7646	72.6437	73.6791	14.8729	15.148	14.5714	15.1488	40.6873	41.2237
A	4	Sample X4	71087	56398	115.2	79.8823		74.5014	75.8591	73.7622	74.3735	15.3467	16.3001	14.2469	15.4793	52.527	52.8832	53.2094	52.0928	46.029	46.5341	47.6985	47.5759	22.2048	22.4347	20.8663	20.8068	17.4611	17.9714	16.2492	17.3335	16.6213	16.7269	15.8952	14.5834	23.4347	23.5722	82.3529	22.5474	65.2505	66.1391	66.0039	66.1378	15.0634	14.4102	13.6209	14.5047	32.3906	32.4418
A	5	Sample X5	26110	20851	112	77.5526		71.4718	72.0866	71.4083	71.3946	15.1584	17.0395	14.0256	14.6294	41.1232	40.875	41.7004	41.144	35.8224	37.1923	36.051	36.6413	18.5585	17.3144	18.7442	17.6925	16.2185	16.6669	14.3459	15.4098	15.5872	15.5443	14.6939	94.6746	20.4345	19.1765	19.4838	85.3659	57.2647	56.7074	55.8896	57.4564	14.204	15.1626	14.5847	13.868	26.2495	27.2742
A	6	Sample X6	18716	15135	105.8	73.1025		67.9915	66.5614	65.5826	67.1775	14.6564	15.0009	13.901	13.9478	31.1598	31.3855	34.5395	32.5439	29.1691	29.3677	29.6147	29.3844	16.9826	16.6016	15.7673	15.4185	15.8763	16.3332	13.5829	12.8895	15.5116	15.2396	14.8287	98.1595	18.3892	17.9547	18.5324	85.3659	47.3077	44.7093	43.9836	45.5411	15.5211	15.1131	14.7779	14.5606	24.91	24.248
A	7	Sample X7	30074	24224	107.7	74.5014		62.0832	61.495	59.9703	61.2429	14.3524	14.6452	14.2898	13.9265	27.6657	26.9731	28.0477	26.7761	24.1893	24.7286	26.2957	24.7743	15.9723	15.8048	14.5958	14.7873	14.5118	14.5518	13.1977	13.8159	14.6734	15.0559	14.1514	15.9621	18.0048	17.5835	16.6247	16.974	35.5042	34.372	34.5302	36.3713	14.8482	14.6981	14.2364	14.7562	22.7581	21.9745
A	8	Sample X8	20808	17205	94.8	65.2505		53.0774	52.713	50.2247	53.6585	15.2615	14.0263	13.9454	14.4893	24.2807	23.6636	24.7111	23.3897	21.9293	22.8616	21.9221	23.8735	15.2436	16.0636	14.4447	13.6544	15.1957	15.0642	13.8042	13.6631	14.9429	15.3791	15.0169	14.2787	17.7543	16.6243	16.843	16.3197	27.5422	26.1486	25.4237	27.2421	14.9416	14.7879	14.2017	14.7969	21.5391	20.0616
A	9	Sample X9	26466	21501	103.5	71.4718		42.5774	42.7858	41.2063	42.1777	14.8386	15.1089	13.632	14.5818	19.5115	21.7711	22.4801	22.5133	21.6613	21.8009	19.9923	19.8314	15.1476	14.7958	13.9863	15.2971	14.1936	14.0935	14.913	13.8414	15.1697	15.0189	15.0085	14.1631	17.3347	16.8903	15.9862	15.5966	22.0833	22.5482	21.2814	22.1399	15.1713	16.3865	14.9565	14.3834	21.2216	21.2575
A	10	Sample X10	21169	17906	83.5	57.2647		34.2821	33.5938	31.8242	32.029	14.9031	15.0298	13.7289	15.5472	20.7429	22.1966	21.753	22.0486	19.323	20.5868	19.9795	19.5422	14.6931	14.5745	13.9058	13.7243	14.2558	14.2286	13.5375	13.1997	14.6004	15.6342	14.46	15.0234	16.7985	16.9469	15.9833	15.8492	19.0081	18.795	18.7909	18.7106	15.4544	14.9153	14.1078	13.566	20.9082	20.3062
A	11	Sample X11	27306	22403	98.6	67.9915		25.152	24.2907	24.9395	25.2106	15.0808	14.5662	14.8159	14.211	20.2302	20.41	21.2486	20.6224	19.4326	19.6487	19.8206	20.5444	15.1674	14.294	13.551	14.0295	13.8062	14.0648	13.2338	13.1401	15.4081	14.6221	14.2133	15.3918	16.6432	17.2849	17.493	15.5671	18.1638	17.7198	18.3035	17.2917	13.6741	16.0811	13.835	14.2037	19.5977	20.694
A	12	Sample X12	19814	17245	69.3	47.3077		16.9237	16.5477	17.6117	17.1648	16.2319	14.8045	14.2981	15.3866	20.3518	20.6006	20.5768	19.7267	20.3498	19.1843	19.9498	18.9699	13.9571	14.1454	13.8579	13.8778	13.3819	13.7301	13.7154	13.6076	13.8166	14.3816	13.6235	14.6417	16.3775	15.6211	16.3216	15.8362	16.3278	16.1003	15.6754	15.0891	15.4001	14.3825	14.1983	13.7767	19.5431	19.6216
A	13	Sample X13	28827	24051	90.3	62.0832
A	14	Sample X14	20030	18038	52.3	35.5042
A	15	Sample X15	29510	25262	77.6	53.0774
A	16	Sample X16	22142	20408	40.8	27.5422
A	17	Sample X17	30465	26879	62.5	42.5774
A	18	Sample X18	25328	23721	32.8	22.0833
A	19	Sample X19	30110	27212	50.6	34.2821
A	20	Sample X20	23937	22622	28.2	19.0081
A	21	Sample X21	31263	29017	37.3	25.152
A	22	Sample X22	33529	31766	27	18.1638
A	23	Sample X23	31644	30090	25.2	16.9237
A	24	Sample X24	45157	43015	24.3	16.3278
B	1	Sample X25	77	59	132.4	92.3077		92.3077																																83.0158
B	2	Sample X26	43856	34489	119.6	83.0158		80.0282																																82.3154
B	3	Sample X27	53252	42231	115.4	80.0282		78.2868																																74.7646
B	4	Sample X28	61305	48306	118.6	82.3154		75.8591																																66.1391
B	5	Sample X29	25312	20172	113	78.2868		72.0866																																56.7074
B	6	Sample X30	30766	24763	108.1	74.7646		66.5614																																44.7093
B	7	Sample X31	30810	24722	109.6	75.8591		61.495																																34.372
B	8	Sample X32	26136	21556	96	66.1391		52.713																																26.1486
B	9	Sample X33	28152	22831	104.4	72.0866		42.7858																																22.5482
B	10	Sample X34	26081	22096	82.7	56.7074		33.5938																																18.795
B	11	Sample X35	27499	22653	96.6	66.5614		24.2907																																17.7198
B	12	Sample X36	28241	24764	65.6	44.7093		16.5477																																16.1003
B	13	Sample X37	31568	26382	89.5	61.495
B	14	Sample X38	30171	27260	50.7	34.372
B	15	Sample X39	31428	26932	77	52.713
B	16	Sample X40	29364	27175	38.7	26.1486
B	17	Sample X41	31377	27667	62.8	42.7858
B	18	Sample X42	29262	27368	33.4	22.5482
B	19	Sample X43	30179	27329	49.6	33.5938
B	20	Sample X44	29351	27756	27.9	18.795
B	21	Sample X45	28865	26859	36	24.2907
B	22	Sample X46	30970	29380	26.3	17.7198
B	23	Sample X47	30737	29260	24.6	16.5477
B	24	Sample X48	40689	38785	24	16.1003
C	1	Sample X49	37540	35536	27.4	18.451		18.451																																15.933
C	2	Sample X50	43348	41340	23.7	15.933		15.5839																																15.0397
C	3	Sample X51	40804	38954	23.2	15.5839		15.2781																																14.8729
C	4	Sample X52	44359	42416	22.4	15.0397		15.3467																																15.0634
C	5	Sample X53	27386	26168	22.7	15.2781		15.1584																																14.204
C	6	Sample X54	28710	27466	22.1	14.8729		14.6564																																15.5211
C	7	Sample X55	31946	30519	22.8	15.3467		14.3524																																14.8482
C	8	Sample X56	28745	27484	22.4	15.0634		15.2615																																14.9416
C	9	Sample X57	29567	28262	22.6	15.1584		14.8386																																15.1713
C	10	Sample X58	28237	27067	21.2	14.204		14.9031																																15.4544
C	11	Sample X59	31018	29693	21.8	14.6564		15.0808																																13.6741
C	12	Sample X60	31487	30065	23.1	15.5211		16.2319																																15.4001
C	13	Sample X61	35503	34017	21.4	14.3524
C	14	Sample X62	34443	32953	22.1	14.8482
C	15	Sample X63	36058	34456	22.7	15.2615
C	16	Sample X64	35038	33513	22.2	14.9416
C	17	Sample X65	37009	35409	22.1	14.8386
C	18	Sample X66	35700	34123	22.6	15.1713
C	19	Sample X67	37222	35606	22.2	14.9031
C	20	Sample X68	35599	33998	23	15.4544
C	21	Sample X69	37593	35942	22.5	15.0808
C	22	Sample X70	39018	37460	20.4	13.6741
C	23	Sample X71	39182	37334	24.2	16.2319
C	24	Sample X72	51205	48910	22.9	15.4001
D	1	Sample X73	38090	36123	26.5	17.8274		17.8274																																15.3954
D	2	Sample X74	45663	43617	22.9	15.3954		16.9209																																14.4334
D	3	Sample X75	39042	37125	25.2	16.9209		15.948																																15.148
D	4	Sample X76	39420	37761	21.5	14.4334		16.3001																																14.4102
D	5	Sample X77	22064	21041	23.7	15.948		17.0395																																15.1626
D	6	Sample X78	29904	28585	22.6	15.148		15.0009																																15.1131
D	7	Sample X79	30640	29189	24.3	16.3001		14.6452																																14.6981
D	8	Sample X80	28582	27381	21.5	14.4102		14.0263																																14.7879
D	9	Sample X81	30020	28536	25.3	17.0395		15.1089																																16.3865
D	10	Sample X82	27747	26522	22.6	15.1626		15.0298																																14.9153
D	11	Sample X83	29296	28016	22.3	15.0009		14.5662																																16.0811
D	12	Sample X84	29494	28196	22.5	15.1131		14.8045																																14.3825
D	13	Sample X85	33337	31914	21.8	14.6452
D	14	Sample X86	33127	31708	21.9	14.6981
D	15	Sample X87	33398	32031	20.9	14.0263
D	16	Sample X88	34092	32623	22	14.7879
D	17	Sample X89	35616	34049	22.5	15.1089
D	18	Sample X90	34118	32494	24.4	16.3865
D	19	Sample X91	33719	32243	22.4	15.0298
D	20	Sample X92	33579	32120	22.2	14.9153
D	21	Sample X93	34855	33375	21.7	14.5662
D	22	Sample X94	36671	34957	23.9	16.0811
D	23	Sample X95	36860	35270	22	14.8045
D	24	Sample X96	51906	49729	21.4	14.3825
E	1	Sample X97	19311	15460	110.8	76.6658		76.6658																																70.0589
E	2	Sample X98	32721	26689	101.5	70.0589		66.5113																																55.1217
E	3	Sample X99	21714	17890	96.6	66.5113		68.6893																																40.6873
E	4	Sample X100	50522	42997	80.5	55.1217		52.527																																32.3906
E	5	Sample X101	19881	16279	99.6	68.6893		41.1232																																26.2495
E	6	Sample X102	20075	17809	59.8	40.6873		31.1598																																24.91
E	7	Sample X103	23366	20034	76.8	52.527		27.6657																																22.7581
E	8	Sample X104	20732	18840	47.8	32.3906		24.2807																																21.5391
E	9	Sample X105	22238	19703	60.4	41.1232		19.5115																																21.2216
E	10	Sample X106	21438	19834	38.9	26.2495		20.7429																																20.9082
E	11	Sample X107	23933	21827	46	31.1598		20.2302																																19.5977
E	12	Sample X108	24795	23030	36.9	24.91		20.3518																																19.5431
E	13	Sample X109	27376	25223	40.9	27.6657
E	14	Sample X110	27258	25478	33.8	22.7581
E	15	Sample X111	27624	25705	36	24.2807
E	16	Sample X112	27200	25515	32	21.5391
E	17	Sample X113	28614	27002	29	19.5115
E	18	Sample X114	27541	25859	31.5	21.2216
E	19	Sample X115	28887	27161	30.8	20.7429
E	20	Sample X116	27555	25896	31	20.9082
E	21	Sample X117	28750	27073	30	20.2302
E	22	Sample X118	28210	26614	29.1	19.5977
E	23	Sample X119	29403	27678	30.2	20.3518
E	24	Sample X120	37679	35553	29	19.5431
F	1	Sample X121	31342	24151	129.6	90.2893		90.2893																																69.6771
F	2	Sample X122	32077	26192	101	69.6771		79.4003																																55.0143
F	3	Sample X123	34832	27672	114.6	79.4003		68.5942																																41.2237
F	4	Sample X124	37906	32270	80.3	55.0143		52.8832																																32.4418
F	5	Sample X125	15628	12800	99.5	68.5942		40.875																																27.2742
F	6	Sample X126	18328	16234	60.6	41.2237		31.3855																																24.248
F	7	Sample X127	20122	17235	77.3	52.8832		26.9731																																21.9745
F	8	Sample X128	18699	16990	47.9	32.4418		23.6636																																20.0616
F	9	Sample X129	19187	17012	60.1	40.875		21.7711																																21.2575
F	10	Sample X130	19139	17654	40.4	27.2742		22.1966																																20.3062
F	11	Sample X131	20351	18548	46.4	31.3855		20.41																																20.694
F	12	Sample X132	22586	21019	35.9	24.248		20.6006																																19.6216
F	13	Sample X133	23223	21440	39.9	26.9731
F	14	Sample X134	23627	22135	32.6	21.9745
F	15	Sample X135	21923	20437	35.1	23.6636
F	16	Sample X136	22726	21411	29.8	20.0616
F	17	Sample X137	21314	19980	32.3	21.7711
F	18	Sample X138	23573	22131	31.6	21.2575
F	19	Sample X139	23526	22026	32.9	22.1966
F	20	Sample X140	23744	22354	30.2	20.3062
F	21	Sample X141	22625	21294	30.3	20.41
F	22	Sample X142	25128	23630	30.7	20.694
F	23	Sample X143	25945	24405	30.6	20.6006
F	24	Sample X144	35998	33959	29.1	19.6216
G	1	Sample X145	38694	30590	117	81.1422		81.1422																																85.1591
G	2	Sample X146	40793	31888	122.5	85.1591		69.811																																66.8276
G	3	Sample X147	35277	28794	101.2	69.811		60.236																																51.9826
G	4	Sample X148	55585	45755	97	66.8276		46.029																																38.8579
G	5	Sample X149	19023	15955	87.7	60.236		35.8224																																30.9715
G	6	Sample X150	21039	18067	76	51.9826		29.1691																																25.8256
G	7	Sample X151	22120	19323	67.5	46.029		24.1893																																22.5212
G	8	Sample X152	20043	17875	57.2	38.8579		21.9293																																21.1249
G	9	Sample X153	16284	14651	52.8	35.8224		21.6613																																19.7332
G	10	Sample X154	18824	17177	45.7	30.9715		19.323																																19.375
G	11	Sample X155	17827	16353	43.1	29.1691		19.4326																																20.3226
G	12	Sample X156	20700	19175	38.2	25.8256		20.3498																																18.8349
G	13	Sample X157	21468	19982	35.9	24.1893
G	14	Sample X158	23325	21817	33.4	22.5212
G	15	Sample X159	20167	18896	32.5	21.9293
G	16	Sample X160	22761	21377	31.4	21.1249
G	17	Sample X161	20101	18849	32.1	21.6613
G	18	Sample X162	21843	20599	29.3	19.7332
G	19	Sample X163	17541	16562	28.7	19.323
G	20	Sample X164	23679	22354	28.8	19.375
G	21	Sample X165	23861	22522	28.9	19.4326
G	22	Sample X166	25330	23846	30.2	20.3226
G	23	Sample X167	24036	22626	30.2	20.3498
G	24	Sample X168	34433	32558	28	18.8349
H	1	Sample X169	34858	27487	118.2	82.0532		82.0532																																85.5714
H	2	Sample X170	46063	35966	123.1	85.5714		71.6395																																67.2863
H	3	Sample X171	37817	30708	103.7	71.6395		60.0984																																52.4358
H	4	Sample X172	54610	44894	97.6	67.2863		46.5341																																38.8736
H	5	Sample X173	16850	14138	87.5	60.0984		37.1923																																29.6639
H	6	Sample X174	20797	17836	76.6	52.4358		29.3677																																26.6394
H	7	Sample X175	20710	18065	68.2	46.5341		24.7286																																22.3533
H	8	Sample X176	19518	17406	57.2	38.8736		22.8616																																20.2857
H	9	Sample X177	19056	17077	54.8	37.1923		21.8009																																20.2647
H	10	Sample X178	17796	16301	43.8	29.6639		20.5868																																20.581
H	11	Sample X179	19792	18145	43.4	29.3677		19.6487																																19.1027
H	12	Sample X180	21153	19548	39.4	26.6394		19.1843																																20.7679
H	13	Sample X181	22719	21113	36.6	24.7286
H	14	Sample X182	22262	20833	33.2	22.3533
H	15	Sample X183	22703	21214	33.9	22.8616
H	16	Sample X184	21681	20413	30.1	20.2857
H	17	Sample X185	22786	21358	32.3	21.8009
H	18	Sample X186	20864	19645	30.1	20.2647
H	19	Sample X187	19387	18237	30.6	20.5868
H	20	Sample X188	22495	21161	30.6	20.581
H	21	Sample X189	22286	21022	29.2	19.6487
H	22	Sample X190	23080	21806	28.4	19.1027
H	23	Sample X191	24519	23160	28.5	19.1843
H	24	Sample X192	33501	31497	30.8	20.7679
I	1	Sample X193	36450	31663	70.3	47.9775
I	2	Sample X194	44732	40869	45.1	30.5448
I	3	Sample X195	49044	44001	54.2	36.7979
I	4	Sample X196	58442	54708	33	22.245
I	5	Sample X197	21348	19594	42.8	28.9745
I	6	Sample X198	23991	22686	28	18.8141
I	7	Sample X199	27108	25379	32.9	22.2048
I	8	Sample X200	23806	22612	25.7	17.2968
I	9	Sample X201	24328	23022	27.6	18.5585
I	10	Sample X202	23534	22423	24.2	16.2474
I	11	Sample X203	26180	24890	25.3	16.9826
I	12	Sample X204	26750	25533	23.3	15.6395
I	13	Sample X205	30129	28730	23.8	15.9723
I	14	Sample X206	29562	28214	23.3	15.6762
I	15	Sample X207	30015	28683	22.7	15.2436
I	16	Sample X208	30017	28771	21.2	14.2304
I	17	Sample X209	31968	30558	22.6	15.1476
I	18	Sample X210	30398	29063	22.5	15.0807
I	19	Sample X211	32344	30959	21.9	14.6931
I	20	Sample X212	31666	30334	21.5	14.4259
I	21	Sample X213	31701	30301	22.6	15.1674
I	22	Sample X214	31995	30678	21	14.108
I	23	Sample X215	31276	30002	20.8	13.9571
I	24	Sample X216	43310	41566	20.5	13.7929
J	1	Sample X217	35258	30519	72	49.2128
J	2	Sample X218	43640	39912	44.6	30.195
J	3	Sample X219	47277	42461	53.7	36.4299
J	4	Sample X220	52168	48679	34.6	23.3337
J	5	Sample X221	15512	14191	44.5	30.0952
J	6	Sample X222	21019	19846	28.7	19.321
J	7	Sample X223	23349	21845	33.3	22.4347
J	8	Sample X224	21114	20077	25.2	16.9256
J	9	Sample X225	22488	21359	25.7	17.3144
J	10	Sample X226	21053	20069	23.9	16.0808
J	11	Sample X227	22944	21838	24.7	16.6016
J	12	Sample X228	24016	22908	23.6	15.8667
J	13	Sample X229	26631	25407	23.5	15.8048
J	14	Sample X230	26133	24975	22.7	15.2202
J	15	Sample X231	27136	25869	23.9	16.0636
J	16	Sample X232	25870	24758	22	14.7507
J	17	Sample X233	27278	26102	22	14.7958
J	18	Sample X234	25836	24711	22.3	14.9486
J	19	Sample X235	26527	25400	21.7	14.5745
J	20	Sample X236	26344	25196	22.3	14.9604
J	21	Sample X237	26721	25607	21.3	14.294
J	22	Sample X238	27509	26372	21.1	14.1677
J	23	Sample X239	28375	27204	21.1	14.1454
J	24	Sample X240	39949	38301	21.1	14.1397
K	1	Sample X241	42073	37906	52.1	35.348
K	2	Sample X242	51711	48396	33.1	22.3228
K	3	Sample X243	57641	53561	36.7	24.7628
K	4	Sample X244	66301	62938	26	17.4995
K	5	Sample X245	33435	31361	32	21.5689
K	6	Sample X246	35595	33879	24.7	16.6033
K	7	Sample X247	38980	37007	26	17.4611
K	8	Sample X248	33341	31736	24.7	16.5784
K	9	Sample X249	33484	31906	24.1	16.2185
K	10	Sample X250	30777	29440	22.2	14.9124
K	11	Sample X251	33165	31634	23.6	15.8763
K	12	Sample X252	31778	30469	21	14.1184
K	13	Sample X253	35171	33683	21.6	14.5118
K	14	Sample X254	35313	33906	20.3	13.6436
K	15	Sample X255	35780	34197	22.6	15.1957
K	16	Sample X256	35057	33594	21.3	14.3088
K	17	Sample X257	37314	35769	21.1	14.1936
K	18	Sample X258	35581	34134	20.8	13.9337
K	19	Sample X259	37276	35726	21.2	14.2558
K	20	Sample X260	37451	35802	22.5	15.1208
K	21	Sample X261	37935	36406	20.6	13.8062
K	22	Sample X262	36991	35452	21.2	14.2639
K	23	Sample X263	38415	36913	19.9	13.3819
K	24	Sample X264	55893	53651	20.5	13.7382
L	1	Sample X265	42421	38096	53.7	36.4631
L	2	Sample X266	49261	45979	34.5	23.2405
L	3	Sample X267	54896	50991	36.9	24.892
L	4	Sample X268	61526	58432	25.8	17.344
L	5	Sample X269	26156	24524	32.2	21.701
L	6	Sample X270	33907	32274	24.7	16.5863
L	7	Sample X271	33472	31730	26.7	17.9714
L	8	Sample X272	29690	28309	23.8	16.0008
L	9	Sample X273	31165	29657	24.8	16.6669
L	10	Sample X274	28109	26897	22	14.798
L	11	Sample X275	30896	29430	24.3	16.3332
L	12	Sample X276	32351	30927	22.5	15.116
L	13	Sample X277	34582	33115	21.7	14.5518
L	14	Sample X278	33147	31706	22.2	14.9235
L	15	Sample X279	34784	33258	22.4	15.0642
L	16	Sample X280	34029	32578	21.8	14.6292
L	17	Sample X281	35383	33928	21	14.0935
L	18	Sample X282	34402	32977	21.1	14.1994
L	19	Sample X283	35249	33786	21.2	14.2286
L	20	Sample X284	35441	34006	20.7	13.871
L	21	Sample X285	34576	33157	20.9	14.0648
L	22	Sample X286	37606	36031	21.4	14.3615
L	23	Sample X287	37167	35677	20.5	13.7301
L	24	Sample X288	53815	51739	19.7	13.1983
M	1	Sample X289	34630	32042	38.8	26.2172
M	2	Sample X290	56453	53412	27.7	18.6248
M	3	Sample X291	57536	54156	30.3	20.3801
M	4	Sample X292	79420	75580	24.8	16.6537
M	5	Sample X293	23523	22240	28	18.8668
M	6	Sample X294	22816	21757	23.8	15.9656
M	7	Sample X295	23643	22502	24.7	16.6213
M	8	Sample X296	21500	20478	24.3	16.3635
M	9	Sample X297	22184	21178	23.2	15.5872
M	10	Sample X298	21531	20543	23.5	15.7785
M	11	Sample X299	23862	22785	23.1	15.5116
M	12	Sample X300	23793	22721	23	15.4835
M	13	Sample X301	27312	26144	21.8	14.6734
M	14	Sample X302	26628	25514	21.4	14.3453
M	15	Sample X303	28051	26830	22.2	14.9429
M	16	Sample X304	27252	26040	22.7	15.2776
M	17	Sample X305	29455	28154	22.6	15.1697
M	18	Sample X306	27650	26425	22.7	15.2174
M	19	Sample X307	28925	27694	21.7	14.6004
M	20	Sample X308	29550	28288	21.8	14.653
M	21	Sample X309	29927	28585	22.9	15.4081
M	22	Sample X310	29361	28153	21	14.1011
M	23	Sample X311	30420	29193	20.6	13.8166
M	24	Sample X312	44440	42563	21.6	14.4868
N	1	Sample X313	38078	35221	39	26.3269
N	2	Sample X314	52007	49223	27.5	18.5041
N	3	Sample X315	53788	50769	28.9	19.4365
N	4	Sample X316	56393	53776	23.8	15.9627
N	5	Sample X317	15819	15008	26.3	17.6939
N	6	Sample X318	19068	18098	26.1	17.5521
N	7	Sample X319	20018	19046	24.9	16.7269
N	8	Sample X320	19168	18249	24.6	16.5092
N	9	Sample X321	20165	19253	23.1	15.5443
N	10	Sample X322	19649	18758	23.2	15.5865
N	11	Sample X323	21976	21001	22.7	15.2396
N	12	Sample X324	23963	22874	23.3	15.6216
N	13	Sample X325	25908	24772	22.4	15.0559
N	14	Sample X326	25253	24153	22.3	14.954
N	15	Sample X327	25871	24713	22.9	15.3791
N	16	Sample X328	24656	23581	22.3	14.9684
N	17	Sample X329	25650	24528	22.4	15.0189
N	18	Sample X330	24260	23201	22.3	14.9868
N	19	Sample X331	24582	23464	23.3	15.6342
N	20	Sample X332	24373	23375	20.9	14.032
N	21	Sample X333	24918	23856	21.8	14.6221
N	22	Sample X334	25843	24836	19.9	13.3351
N	23	Sample X335	27731	26568	21.4	14.3816
N	24	Sample X336	42659	40696	23.5	15.8241
O	1	Sample X337	31975	27493	75.4	51.5403
O	2	Sample X338	45886	42059	43.5	29.4376
O	3	Sample X339	50505	45383	53.4	36.2566
O	4	Sample X340	67354	62683	35.9	24.2372
O	5	Sample X341	28948	26528	43.6	29.5108
O	6	Sample X342	28045	26375	30.7	20.6696
O	7	Sample X343	25999	24253	34.7	23.4347
O	8	Sample X344	22983	21763	27.3	18.3434
O	9	Sample X345	22599	21268	30.3	20.4345
O	10	Sample X346	21857	20697	27.3	18.3396
O	11	Sample X347	23999	22722	27.3	18.3892
O	12	Sample X348	23231	22035	26.4	17.7709
O	13	Sample X349	26392	25016	26.8	18.0048
O	14	Sample X350	27288	25855	27	18.1397
O	15	Sample X351	27218	25818	26.4	17.7543
O	16	Sample X352	27022	25686	25.3	17.0421
O	17	Sample X353	29068	27607	25.8	17.3347
O	18	Sample X354	26678	25376	25	16.8152
O	19	Sample X355	28652	27255	25	16.7985
O	20	Sample X356	28585	27133	26.1	17.5254
O	21	Sample X357	29635	28203	24.8	16.6432
O	22	Sample X358	29523	28166	23.5	15.8057
O	23	Sample X359	30878	29409	24.4	16.3775
O	24	Sample X360	46266	44111	23.8	16.0237
P	1	Sample X361	32303	27805	74.8	51.1642
P	2	Sample X362	46239	42505	42.1	28.4497
P	3	Sample X363	45126	40532	53.6	36.4054
P	4	Sample X364	57788	54015	33.7	22.7539
P	5	Sample X365	33975	31277	41.3	27.9501
P	6	Sample X366	18744	17645	30.2	20.339
P	7	Sample X367	28016	26124	34.9	23.5722
P	8	Sample X368	77	64	92.2	63.4146
P	9	Sample X369	36044	34047	28.5	19.1765
P	10	Sample X370	71	57	109.4	75.6757
P	11	Sample X371	38887	36865	26.7	17.9547
P	12	Sample X372	65	52	111.1	76.9231
P	13	Sample X373	46371	44008	26.1	17.5835
P	14	Sample X374	64	50	122.8	85.3659
P	15	Sample X375	44170	42038	24.7	16.6243
P	16	Sample X376	64	50	122.8	85.3659
P	17	Sample X377	24115	22933	25.1	16.8903
P	18	Sample X378	23119	21969	25.5	17.1496
P	19	Sample X379	22939	21811	25.2	16.9469
P	20	Sample X380	22883	21697	26.6	17.8946
P	21	Sample X381	22944	21794	25.7	17.2849
P	22	Sample X382	26375	25143	23.9	16.0708
P	23	Sample X383	28959	27643	23.3	15.6211
P	24	Sample X384	51846	49511	23	15.4771
[truncated: 22 more columns]
