# Supplementary material for: PDZ-directed substrate recruitment is the primary determinant of specific 4E-BP1 dephosphorylation by PP1-Neurabin
Source: eLife journal article supplement (doi:10.7554/elife.103403), 2024-11-20
Supplement: fig4-data3 [file 231205-assay2-repCD.xlsx]

## Sheet: End point
Well Row	Well Col	Content	Raw Data (parallel)	Raw Data (perpendicular)	Polarization based on Raw Data (F: 482-16 / F: 530-40)
A	1	Sample X1	39120	30824	118.6	82.3277		82.3277	84.2684		13.2103	14.2709		91.0128	91.8528		82.9523	81.8592		48.7419	48.4731		33.872	30.7251		24.8004	23.7905		49.7946	49.7784			85.5552	86.6917		16.0349	16.0182		70.3425	69.1839		85.9266	82.6512		29.5215	29.5417		22.3362	21.88
A	2	Sample X2	42840	33451	123.1	85.5552		82.0187	81.7493		13.9851	15.471		80.9855	78.5951		70.8055	71.4918		36.1394	36.8807		21.1162	24.4046		19.4013	18.7485		36.2963	36.1591			81.7642	83.1502		56.9527	14.5252		53.3762	53.831		67.037	66.0576		20.4988	21.4958		17.2642	15.4686
A	3	Sample X3	59201	46687	118.2	82.0187		77.604	78.1328		13.3596	14.3853		67.3209	66.5612		59.3076	58.2794		28.0278	26.7699		20.2667	19.7088		16.9594	16.8452		27.9485	27.3607			72.6437	73.6791		14.5714	15.1488		41.0031	42.3379		52.5064	50.7048		18.6191	17.488		15.5298	16.3087
A	4	Sample X4	76706	60535	117.8	81.7642		73.7622	74.3735		14.2469	15.4793		53.2094	52.0928		47.6985	47.5759		20.8663	20.8068		16.2492	17.3335		15.8952	14.5834		82.3529	22.5474			66.0039	66.1378		13.6209	14.5047		33.3807	31.4654		38.8844	38.7093		16.7034	15.1085		14.6476	13.6528
A	5	Sample X5	29231	23340	112.1	77.604		71.4083	71.3946		14.0256	14.6294		41.7004	41.144		36.051	36.6413		18.7442	17.6925		14.3459	15.4098		14.6939	94.6746		19.4838	85.3659			55.8896	57.4564		14.5847	13.868		27.7005	28.1185		31.1988	30.3828		13.9459	14.3051		12.5872	14.2331
A	6	Sample X6	27154	21987	105.1	72.6437		65.5826	67.1775		13.901	13.9478		34.5395	32.5439		29.6147	29.3844		15.7673	15.4185		13.5829	12.8895		14.8287	98.1595		18.5324	85.3659			43.9836	45.5411		14.7779	14.5606		24.3993	23.3545		25.2443	26.4149		15.2397	13.7513		14.4367	14.0028
A	7	Sample X7	25441	20535	106.7	73.7622		59.9703	61.2429		14.2898	13.9265		28.0477	26.7761		26.2957	24.7743		14.5958	14.7873		13.1977	13.8159		14.1514	15.9621		16.6247	16.974			34.5302	36.3713		14.2364	14.7562		22.026	22.1605		23.0346	22.5396		14.5198	14.7733		13.1858	13.4166
A	8	Sample X8	23988	19792	95.8	66.0039		50.2247	53.6585		13.9454	14.4893		24.7111	23.3897		21.9221	23.8735		14.4447	13.6544		13.8042	13.6631		15.0169	14.2787		16.843	16.3197			25.4237	27.2421		14.2017	14.7969		21.2745	21.6288		21.7545	21.1235		14.2205	14.2605		13.0316	13.957
A	9	Sample X9	24102	19584	103.4	71.4083		41.2063	42.1777		13.632	14.5818		22.4801	22.5133		19.9923	19.8314		13.9863	15.2971		14.913	13.8414		15.0085	14.1631		15.9862	15.5966			21.2814	22.1399		14.9565	14.3834		20.5482	21.1523		21.2365	20.0885		13.2879	14.3121		14.1536	12.7857
A	10	Sample X10	23851	20254	81.6	55.8896		31.8242	32.029		13.7289	15.5472		21.753	22.0486		19.9795	19.5422		13.9058	13.7243		13.5375	13.1997		14.46	15.0234		15.9833	15.8492			18.7909	18.7106		14.1078	13.566		21.7647	20.9924		19.483	19.5435		13.9894	14.1031		13.228	13.1441
A	11	Sample X11	25067	20707	95.3	65.5826		24.9395	25.2106		14.8159	14.211		21.2486	20.6224		19.8206	20.5444		13.551	14.0295		13.2338	13.1401		14.2133	15.3918		17.493	15.5671			18.3035	17.2917		13.835	14.2037		21.3033	20.8601		20.222	19.6306		14.0915	14.8324		13.7047	13.2661
A	12	Sample X12	25148	22098	64.6	43.9836		17.6117	17.1648		14.2981	15.3866		20.5768	19.7267		19.9498	18.9699		13.8579	13.8778		13.7154	13.6076		13.6235	14.6417		16.3216	15.8362			15.6754	15.0891		14.1983	13.7767		19.396	20.0261		18.7439	19.4349		13.7305	14.3481		13.0415	13.5519
A	13	Sample X13	27172	22807	87.3	59.9703
A	14	Sample X14	26925	24316	50.9	34.5302
A	15	Sample X15	25796	22264	73.5	50.2247
A	16	Sample X16	26040	24150	37.7	25.4237
A	17	Sample X17	28606	25339	60.6	41.2063
A	18	Sample X18	26438	24819	31.6	21.2814
A	19	Sample X19	28231	25697	47	31.8242
A	20	Sample X20	26946	25482	27.9	18.7909
A	21	Sample X21	26914	24996	36.9	24.9395
A	22	Sample X22	26807	25387	27.2	18.3035
A	23	Sample X23	28097	26663	26.2	17.6117
A	24	Sample X24	43841	41842	23.3	15.6754
B	1	Sample X25	37385	29297	121.3	84.2684		84.2684																									86.6917
B	2	Sample X26	42004	32694	124.6	86.6917		81.7493																									83.1502
B	3	Sample X27	59454	46922	117.8	81.7493		78.1328																									73.6791
B	4	Sample X28	52716	41441	119.7	83.1502		74.3735																									66.1378
B	5	Sample X29	32498	25910	112.8	78.1328		71.3946																									57.4564
B	6	Sample X30	24350	19659	106.6	73.6791		67.1775																									45.5411
B	7	Sample X31	28940	23319	107.6	74.3735		61.2429																									36.3713
B	8	Sample X32	25931	21387	96	66.1378		53.6585																									27.2421
B	9	Sample X33	27206	22107	103.4	71.3946		42.1777																									22.1399
B	10	Sample X34	25601	21643	83.8	57.4564		32.029																									18.7106
B	11	Sample X35	29511	24268	97.5	67.1775		25.2106																									17.2917
B	12	Sample X36	29221	25562	66.8	45.5411		17.1648																									15.0891
B	13	Sample X37	33205	27770	89.1	61.2429
B	14	Sample X38	33063	29700	53.6	36.3713
B	15	Sample X39	35185	30070	78.4	53.6585
B	16	Sample X40	34721	32030	40.3	27.2421
B	17	Sample X41	36130	31914	62	42.1777
B	18	Sample X42	33253	31138	32.8	22.1399
B	19	Sample X43	34008	30937	47.3	32.029
B	20	Sample X44	32214	30471	27.8	18.7106
B	21	Sample X45	32041	29734	37.3	25.2106
B	22	Sample X46	30514	28984	25.7	17.2917
B	23	Sample X47	31676	30099	25.5	17.1648
B	24	Sample X48	37095	35465	22.5	15.0891
C	1	Sample X49	36337	34934	19.7	13.2103		13.2103																									16.0349
C	2	Sample X50	40249	38373	23.9	16.0349		13.9851																									56.9527
C	3	Sample X51	49003	47003	20.8	13.9851		13.3596																									14.5714
C	4	Sample X52	502	425	83.1	56.9527		14.2469																									13.6209
C	5	Sample X53	26796	25750	19.9	13.3596		14.0256																									14.5847
C	6	Sample X54	30464	29170	21.7	14.5714		13.901																									14.7779
C	7	Sample X55	30681	29406	21.2	14.2469		14.2898																									14.2364
C	8	Sample X56	28055	26939	20.3	13.6209		13.9454																									14.2017
C	9	Sample X57	27438	26315	20.9	14.0256		13.632																									14.9565
C	10	Sample X58	27779	26598	21.7	14.5847		13.7289																									14.1078
C	11	Sample X59	27135	26034	20.7	13.901		14.8159																									13.835
C	12	Sample X60	31258	29912	22	14.7779		14.2981																									14.1983
C	13	Sample X61	32391	31041	21.3	14.2898
C	14	Sample X62	31305	30005	21.2	14.2364
C	15	Sample X63	30294	29061	20.8	13.9454
C	16	Sample X64	31838	30519	21.2	14.2017
C	17	Sample X65	30218	29015	20.3	13.632
C	18	Sample X66	32640	31218	22.3	14.9565
C	19	Sample X67	29312	28137	20.5	13.7289
C	20	Sample X68	31874	30562	21	14.1078
C	21	Sample X69	33682	32228	22.1	14.8159
C	22	Sample X70	29836	28631	20.6	13.835
C	23	Sample X71	35490	34010	21.3	14.2981
C	24	Sample X72	45559	43672	21.1	14.1983
D	1	Sample X73	35820	34329	21.3	14.2709		14.2709																									16.0182
D	2	Sample X74	39409	37574	23.8	16.0182		15.471																									14.5252
D	3	Sample X75	45402	43358	23	15.471		14.3853																									15.1488
D	4	Sample X76	42602	40798	21.6	14.5252		15.4793																									14.5047
D	5	Sample X77	31443	30124	21.4	14.3853		14.6294																									13.868
D	6	Sample X78	32555	31119	22.6	15.1488		13.9478																									14.5606
D	7	Sample X79	36143	34515	23	15.4793		13.9265																									14.7562
D	8	Sample X80	35850	34334	21.6	14.5047		14.4893																									14.7969
D	9	Sample X81	33067	31657	21.8	14.6294		14.5818																									14.3834
D	10	Sample X82	35572	34132	20.7	13.868		15.5472																									13.566
D	11	Sample X83	39452	37846	20.8	13.9478		14.211																									14.2037
D	12	Sample X84	42360	40562	21.7	14.5606		15.3866																									13.7767
D	13	Sample X85	38920	37338	20.7	13.9265
D	14	Sample X86	42326	40506	22	14.7562
D	15	Sample X87	40432	38724	21.6	14.4893
D	16	Sample X88	42097	40282	22	14.7969
D	17	Sample X89	42300	40502	21.7	14.5818
D	18	Sample X90	40912	39196	21.4	14.3834
D	19	Sample X91	41627	39744	23.1	15.5472
D	20	Sample X92	40204	38611	20.2	13.566
D	21	Sample X93	39730	38083	21.2	14.211
D	22	Sample X94	42260	40509	21.2	14.2037
D	23	Sample X95	45130	43109	22.9	15.3866
D	24	Sample X96	44006	42236	20.5	13.7767
E	1	Sample X97	31776	24436	130.6	91.0128		91.0128																									70.3425
E	2	Sample X98	31935	26027	101.9	70.3425		80.9855																									53.3762
E	3	Sample X99	37998	30053	116.8	80.9855		67.3209																									41.0031
E	4	Sample X100	40834	34926	78	53.3762		53.2094																									33.3807
E	5	Sample X101	16843	13845	97.7	67.3209		41.7004																									27.7005
E	6	Sample X102	16396	14532	60.3	41.0031		34.5395																									24.3993
E	7	Sample X103	18846	16127	77.7	53.2094		28.0477																									22.026
E	8	Sample X104	16767	15193	49.2	33.3807		24.7111																									21.2745
E	9	Sample X105	17866	15803	61.3	41.7004		22.4801																									20.5482
E	10	Sample X106	17450	16076	41	27.7005		21.753																									21.7647
E	11	Sample X107	20346	18374	50.9	34.5395		21.2486																									21.3033
E	12	Sample X108	21736	20219	36.2	24.3993		20.5768																									19.396
E	13	Sample X109	23295	21439	41.5	28.0477
E	14	Sample X110	20888	19566	32.7	22.026
E	15	Sample X111	20342	18905	36.6	24.7111
E	16	Sample X112	20778	19506	31.6	21.2745
E	17	Sample X113	23056	21568	33.3	22.4801
E	18	Sample X114	21854	20560	30.5	20.5482
E	19	Sample X115	22978	21541	32.3	21.753
E	20	Sample X116	22215	20825	32.3	21.7647
E	21	Sample X117	19821	18609	31.5	21.2486
E	22	Sample X118	18565	17427	31.6	21.3033
E	23	Sample X119	20037	18849	30.6	20.5768
E	24	Sample X120	27689	26138	28.8	19.396
F	1	Sample X121	30787	23620	131.7	91.8528		91.8528																									69.1839
F	2	Sample X122	32360	26460	100.3	69.1839		78.5951																									53.831
F	3	Sample X123	40779	32470	113.4	78.5951		66.5612																									42.3379
F	4	Sample X124	38204	32634	78.6	53.831		52.0928																									31.4654
F	5	Sample X125	28895	23803	96.6	66.5612		41.144																									28.1185
F	6	Sample X126	25406	22431	62.2	42.3379		32.5439																									23.3545
F	7	Sample X127	29555	25372	76.2	52.0928		26.7761																									22.1605
F	8	Sample X128	23489	21403	46.5	31.4654		23.3897																									21.6288
F	9	Sample X129	23841	21122	60.5	41.144		22.5133																									21.1523
F	10	Sample X130	22100	20335	41.6	28.1185		22.0486																									20.9924
F	11	Sample X131	23924	21731	48	32.5439		20.6224																									20.8601
F	12	Sample X132	23440	21871	34.6	23.3545		19.7267																									20.0261
F	13	Sample X133	24854	22959	39.6	26.7761
F	14	Sample X134	25055	23460	32.9	22.1605
F	15	Sample X135	26539	24760	34.7	23.3897
F	16	Sample X136	26513	24864	32.1	21.6288
F	17	Sample X137	28083	26268	33.4	22.5133
F	18	Sample X138	26872	25236	31.4	21.1523
F	19	Sample X139	28681	26864	32.7	22.0486
F	20	Sample X140	28210	26505	31.2	20.9924
F	21	Sample X141	27871	26215	30.6	20.6224
F	22	Sample X142	26767	25159	31	20.8601
F	23	Sample X143	27892	26304	29.3	19.7267
F	24	Sample X144	31559	29736	29.7	20.0261
G	1	Sample X145	38839	30549	119.5	82.9523		82.9523																									85.9266
G	2	Sample X146	43832	34190	123.6	85.9266		70.8055																									67.037
G	3	Sample X147	42533	34619	102.6	70.8055		59.3076																									52.5064
G	4	Sample X148	50836	41821	97.3	67.037		47.6985																									38.8844
G	5	Sample X149	21703	18251	86.4	59.3076		36.051																									31.1988
G	6	Sample X150	20449	17534	76.7	52.5064		29.6147																									25.2443
G	7	Sample X151	19903	17303	69.9	47.6985		26.2957																									23.0346
G	8	Sample X152	17970	16025	57.2	38.8844		21.9221																									21.7545
G	9	Sample X153	16604	14929	53.1	36.051		19.9923																									21.2365
G	10	Sample X154	15982	14574	46.1	31.1988		19.9795																									19.483
G	11	Sample X155	18420	16875	43.8	29.6147		19.8206																									20.222
G	12	Sample X156	20321	18856	37.4	25.2443		19.9498																									18.7439
G	13	Sample X157	21589	19971	38.9	26.2957
G	14	Sample X158	19134	17870	34.2	23.0346
G	15	Sample X159	19348	18129	32.5	21.9221
G	16	Sample X160	19139	17942	32.3	21.7545
G	17	Sample X161	20617	19428	29.7	19.9923
G	18	Sample X162	20290	19050	31.5	21.2365
G	19	Sample X163	21688	20438	29.7	19.9795
G	20	Sample X164	21153	19963	28.9	19.483
G	21	Sample X165	18813	17737	29.4	19.8206
G	22	Sample X166	17219	16215	30	20.222
G	23	Sample X167	18105	17063	29.6	19.9498
G	24	Sample X168	26513	25076	27.9	18.7439
H	1	Sample X169	37957	29947	118	81.8592		81.8592																									82.6512
H	2	Sample X170	41329	32535	119.1	82.6512		71.4918																									66.0576
H	3	Sample X171	45213	36729	103.5	71.4918		58.2794																									50.7048
H	4	Sample X172	45228	37311	95.9	66.0576		47.5759																									38.7093
H	5	Sample X173	35565	29996	84.9	58.2794		36.6413																									30.3828
H	6	Sample X174	30056	25905	74.2	50.7048		29.3844																									26.4149
H	7	Sample X175	32641	28387	69.7	47.5759		24.7743																									22.5396
H	8	Sample X176	24809	22135	57	38.7093		23.8735																									21.1235
H	9	Sample X177	23941	21489	54	36.6413		19.8314																									20.0885
H	10	Sample X178	21623	19765	44.9	30.3828		19.5422																									19.5435
H	11	Sample X179	22760	20865	43.4	29.3844		20.5444																									19.6306
H	12	Sample X180	21988	20333	39.1	26.4149		18.9699																									19.4349
H	13	Sample X181	22665	21060	36.7	24.7743
H	14	Sample X182	22024	20599	33.4	22.5396
H	15	Sample X183	23670	22052	35.4	23.8735
H	16	Sample X184	24144	22676	31.4	21.1235
H	17	Sample X185	27331	25767	29.5	19.8314
H	18	Sample X186	29152	27463	29.8	20.0885
H	19	Sample X187	32080	30270	29	19.5422
H	20	Sample X188	31050	29298	29	19.5435
H	21	Sample X189	29476	27731	30.5	20.5444
H	22	Sample X190	29488	27817	29.2	19.6306
H	23	Sample X191	32136	30374	28.2	18.9699
H	24	Sample X192	32001	30205	28.9	19.4349
I	1	Sample X193	38848	33672	71.4	48.7419
I	2	Sample X194	40322	36950	43.6	29.5215
I	3	Sample X195	52695	47367	53.2	36.1394
I	4	Sample X196	57893	54473	30.4	20.4988
I	5	Sample X197	22758	20946	41.5	28.0278
I	6	Sample X198	22599	21382	27.7	18.6191
I	7	Sample X199	23714	22289	31	20.8663
I	8	Sample X200	23778	22625	24.8	16.7034
I	9	Sample X201	24686	23348	27.9	18.7442
I	10	Sample X202	23635	22673	20.8	13.9459
I	11	Sample X203	26954	25718	23.5	15.7673
I	12	Sample X204	27160	25955	22.7	15.2397
I	13	Sample X205	30344	29053	21.7	14.5958
I	14	Sample X206	26506	25384	21.6	14.5198
I	15	Sample X207	25975	24881	21.5	14.4447
I	16	Sample X208	27024	25903	21.2	14.2205
I	17	Sample X209	29032	27847	20.8	13.9863
I	18	Sample X210	26808	25767	19.8	13.2879
I	19	Sample X211	28949	27774	20.7	13.9058
I	20	Sample X212	27213	26102	20.8	13.9894
I	21	Sample X213	23825	22882	20.2	13.551
I	22	Sample X214	22911	21969	21	14.0915
I	23	Sample X215	24572	23578	20.6	13.8579
I	24	Sample X216	32277	30983	20.5	13.7305
J	1	Sample X217	38041	32998	71	48.4731
J	2	Sample X218	40523	37132	43.7	29.5417
J	3	Sample X219	52736	47302	54.3	36.8807
J	4	Sample X220	53955	50619	31.9	21.4958
J	5	Sample X221	40759	37652	39.6	26.7699
J	6	Sample X222	37699	35788	26	17.488
J	7	Sample X223	49594	46622	30.9	20.8068
J	8	Sample X224	37526	35875	22.5	15.1085
J	9	Sample X225	31738	30111	26.3	17.6925
J	10	Sample X226	28786	27585	21.3	14.3051
J	11	Sample X227	30264	28906	23	15.4185
J	12	Sample X228	31806	30529	20.5	13.7513
J	13	Sample X229	34047	32580	22	14.7873
J	14	Sample X230	33544	32100	22	14.7733
J	15	Sample X231	35286	33879	20.3	13.6544
J	16	Sample X232	36134	34631	21.2	14.2605
J	17	Sample X233	38110	36413	22.8	15.2971
J	18	Sample X234	37301	35744	21.3	14.3121
J	19	Sample X235	37282	35788	20.4	13.7243
J	20	Sample X236	36283	34790	21	14.1031
J	21	Sample X237	34563	33148	20.9	14.0295
J	22	Sample X238	34386	32900	22.1	14.8324
J	23	Sample X239	33943	32568	20.7	13.8778
J	24	Sample X240	39074	37439	21.4	14.3481
K	1	Sample X241	50815	45979	50	33.872
K	2	Sample X242	44806	41932	33.1	22.3362
K	3	Sample X243	43862	41196	31.3	21.1162
K	4	Sample X244	61721	58631	25.7	17.2642
K	5	Sample X245	37668	35467	30.1	20.2667
K	6	Sample X246	35520	33915	23.1	15.5298
K	7	Sample X247	35795	34105	24.2	16.2492
K	8	Sample X248	32465	31079	21.8	14.6476
K	9	Sample X249	33463	32063	21.4	14.3459
K	10	Sample X250	31601	30437	18.8	12.5872
K	11	Sample X251	34660	33285	20.2	13.5829
K	12	Sample X252	35040	33565	21.5	14.4367
K	13	Sample X253	36941	35516	19.7	13.1977
K	14	Sample X254	32433	31183	19.6	13.1858
K	15	Sample X255	34392	33006	20.6	13.8042
K	16	Sample X256	32807	31557	19.4	13.0316
K	17	Sample X257	37290	35670	22.2	14.913
K	18	Sample X258	33905	32505	21.1	14.1536
K	19	Sample X259	36240	34807	20.2	13.5375
K	20	Sample X260	32358	31107	19.7	13.228
K	21	Sample X261	33275	31988	19.7	13.2338
K	22	Sample X262	34510	33129	20.4	13.7047
K	23	Sample X263	36057	34613	20.4	13.7154
K	24	Sample X264	48964	47097	19.4	13.0415
L	1	Sample X265	12955	11830	45.4	30.7251
L	2	Sample X266	48308	45270	32.5	21.88
L	3	Sample X267	57115	53128	36.2	24.4046
L	4	Sample X268	56339	53803	23	15.4686
L	5	Sample X269	47166	44483	29.3	19.7088
L	6	Sample X270	37737	35949	24.3	16.3087
L	7	Sample X271	41227	39155	25.8	17.3335
L	8	Sample X272	35014	33618	20.3	13.6528
L	9	Sample X273	33982	32458	22.9	15.4098
L	10	Sample X274	31288	29989	21.2	14.2331
L	11	Sample X275	32894	31654	19.2	12.8895
L	12	Sample X276	32914	31569	20.9	14.0028
L	13	Sample X277	33372	32026	20.6	13.8159
L	14	Sample X278	32272	31007	20	13.4166
L	15	Sample X279	35690	34266	20.4	13.6631
L	16	Sample X280	34394	32993	20.8	13.957
L	17	Sample X281	38757	37191	20.6	13.8414
L	18	Sample X282	38689	37242	19.1	12.7857
L	19	Sample X283	39450	37928	19.7	13.1997
L	20	Sample X284	36229	34837	19.6	13.1441
L	21	Sample X285	38765	37276	19.6	13.1401
L	22	Sample X286	41708	40091	19.8	13.2661
L	23	Sample X287	40512	38902	20.3	13.6076
L	24	Sample X288	47748	45858	20.2	13.5519
M	1	Sample X289	53255	49480	36.7	24.8004
M	2	Sample X290	47672	45230	26.3	17.6787
M	3	Sample X291	52722	49768	28.8	19.4013
M	4	Sample X292	68314	65560	20.6	13.8091
M	5	Sample X293	21175	20133	25.2	16.9594
M	6	Sample X294	21137	20220	22.2	14.8919
M	7	Sample X295	20945	19977	23.7	15.8952
M	8	Sample X296	21157	20245	22	14.7939
M	9	Sample X297	23165	22173	21.9	14.6939
M	10	Sample X298	22935	21932	22.4	15.0152
M	11	Sample X299	25113	24028	22.1	14.8287
M	12	Sample X300	25279	24230	21.2	14.2259
M	13	Sample X301	25917	24847	21.1	14.1514
M	14	Sample X302	22723	21819	20.3	13.6225
M	15	Sample X303	23527	22498	22.4	15.0169
M	16	Sample X304	24663	23635	21.3	14.2911
M	17	Sample X305	26262	25114	22.3	15.0085
M	18	Sample X306	24018	23013	21.4	14.3481
M	19	Sample X307	25047	23991	21.5	14.46
M	20	Sample X308	22849	21895	21.3	14.3159
M	21	Sample X309	21297	20414	21.2	14.2133
M	22	Sample X310	21490	20607	21	14.082
M	23	Sample X311	23978	23024	20.3	13.6235
M	24	Sample X312	42065	40431	19.8	13.2924
N	1	Sample X313	63423	59102	35.3	23.7905
N	2	Sample X314	53311	50647	25.6	17.231
N	3	Sample X315	56223	53175	27.9	18.7485
N	4	Sample X316	56803	54074	24.6	16.5443
N	5	Sample X317	28698	27295	25.1	16.8452
N	6	Sample X318	24220	23181	21.9	14.7205
N	7	Sample X319	26723	25587	21.7	14.5834
N	8	Sample X320	36363	34875	20.9	14.0228
N	9	Sample X321	67	51	135.6	94.6746
N	10	Sample X322	44993	43138	21	14.1313
N	11	Sample X323	65	49	140.4	98.1595
N	12	Sample X324	23428	22432	21.7	14.5844
N	13	Sample X325	27217	25954	23.8	15.9621
N	14	Sample X326	32359	31059	20.5	13.76
N	15	Sample X327	37626	36059	21.3	14.2787
N	16	Sample X328	37780	36230	20.9	14.0602
N	17	Sample X329	37634	36079	21.1	14.1631
N	18	Sample X330	35067	33608	21.2	14.2643
N	19	Sample X331	34030	32541	22.4	15.0234
N	20	Sample X332	31888	30588	20.8	13.9689
N	21	Sample X333	31007	29618	22.9	15.3918
N	22	Sample X334	31132	29792	22	14.7714
N	23	Sample X335	31517	30172	21.8	14.6417
N	24	Sample X336	37648	36146	20.4	13.662
O	1	Sample X337	37739	32612	72.9	49.7946
O	2	Sample X338	44144	40611	41.7	28.1815
O	3	Sample X339	44494	39977	53.5	36.2963
O	4	Sample X340	50474	47152	34	22.9455
O	5	Sample X341	36760	33841	41.3	27.9485
O	6	Sample X342	19998	18887	28.6	19.2308
O	7	Sample X343	66	52	118.6	82.3529
O	8	Sample X344	18222	17275	26.7	17.9451
O	9	Sample X345	19108	18033	28.9	19.4838
O	10	Sample X346	19270	18284	26.3	17.6582
O	11	Sample X347	22160	20972	27.5	18.5324
O	12	Sample X348	23477	22350	24.6	16.5305
O	13	Sample X349	35530	33815	24.7	16.6247
O	14	Sample X350	67	53	116.7	80.9249
O	15	Sample X351	22012	20936	25.1	16.843
O	16	Sample X352	34894	33312	23.2	15.5834
O	17	Sample X353	35354	33711	23.8	15.9862
O	18	Sample X354	65	53	101.7	70.1754
O	19	Sample X355	24664	23518	23.8	15.9833
O	20	Sample X356	24050	22975	22.9	15.3571
O	21	Sample X357	22128	21006	26	17.493
O	22	Sample X358	21917	20857	24.8	16.6585
O	23	Sample X359	24274	23123	24.3	16.3216
O	24	Sample X360	73462	70263	22.3	14.9494
P	1	Sample X361	40445	34952	72.9	49.7784
P	2	Sample X362	44611	41032	41.8	28.2534
P	3	Sample X363	43475	39077	53.3	36.1591
P	4	Sample X364	42130	39590	31.1	20.9381
P	5	Sample X365	34424	31745	40.5	27.3607
P	6	Sample X366	27256	25760	28.2	18.9906
P	7	Sample X367	40109	37513	33.4	22.5474
P	8	Sample X368	20938	19819	27.5	18.4727
P	9	Sample X369	64	50	122.8	85.3659
P	10	Sample X370	32265	30676	25.2	16.9734
P	11	Sample X371	64	50	122.8	85.3659
P	12	Sample X372	38862	37042	24	16.1139
P	13	Sample X373	43675	41524	25.2	16.974
P	14	Sample X374	67	53	116.7	80.9249
P	15	Sample X375	32123	30600	24.3	16.3197
P	16	Sample X376	33056	31571	23	15.4369
P	17	Sample X377	35130	33536	23.2	15.5966
P	18	Sample X378	32434	30965	23.2	15.5674
P	19	Sample X379	33220	31689	23.6	15.8492
P	20	Sample X380	32259	30730	24.3	16.3147
P	21	Sample X381	33119	31619	23.2	15.5671
P	22	Sample X382	34779	33204	23.2	15.5652
P	23	Sample X383	36634	34947	23.6	15.8362
P	24	Sample X384	46321	44276	22.6	15.1624
