# Supplementary material for: PDZ-directed substrate recruitment is the primary determinant of specific 4E-BP1 dephosphorylation by PP1-Neurabin
Source: eLife journal article supplement (doi:10.7554/elife.103403), 2024-11-20
Supplement: fig4-data3 [file 240415-rep1-2.xlsx]

## Sheet: End point
Well Row	Well Col	Content	Raw Data (parallel)	Raw Data (perpendicular)	Polarization based on Raw Data (F: 482-16 / F: 530-40)	Anisotropy based on Raw Data (F: 482-16 / F: 530-40)		Neb								Spino
A	1	Sample X1	33803	28074	92.6	63.7		63.7	67.9	69.8	67.4					71.1	71.2	74.2	72.6
A	2	Sample X2	32901	26757	103	71.1
A	3	Sample X3	32668	27092	93.3	64.2		64.2	66.1	66.2	66.2					65.4	67.7	68.4	69.3
A	4	Sample X4	29836	24658	95	65.4
A	5	Sample X5	30977	25945	88.4	60.7		60.7	63.1	65.4	62.7					60.2	61.4	62.5	61.9
A	6	Sample X6	29018	24341	87.7	60.2
A	7	Sample X7	30938	26099	84.8	58.2		58.2	58	59.7	60.1					49	50.5	51.4	51.3
A	8	Sample X8	29539	25582	71.8	49
A	9	Sample X9	30827	26555	74.4	50.9		50.9	51.5	53.4	53					34.4	34.7	36.3	35.6
A	10	Sample X10	29944	27049	50.8	34.4
A	11	Sample X11	30795	27392	58.5	39.8		39.8	41.7	42.5	42.2					18.2	18.7	21.4	21.5
A	12	Sample X12	29622	28062	27	18.2
A	13	Sample X13	31033	28749	38.2	25.8		25.8	27.4	28.8	28.3					9.3	9.3	10.7	10.2
A	14	Sample X14	29223	28419	13.9	9.3
A	15	Sample X15	32063	30790	20.3	13.6		13.6	15	15.7	14.1					4.2	3.2	5.3	5.9
A	16	Sample X16	29357	28988	6.3	4.2
A	17	Sample X17	31843	31159	10.9	7.3		7.3	7.1	8.3	6.6					2.5	3	2.6	4.1
A	18	Sample X18	31793	31552	3.8	2.5
A	19	Sample X19	31561	31386	2.8	1.9		1.9	4.2	3.9	3.6					2.4	2	2.8	2.3
A	20	Sample X20	30156	29938	3.6	2.4
A	21	Sample X21	31429	31258	2.7	1.8		1.8	1.3	2.7	2.5					2.1	2.4	3.2	2.1
A	22	Sample X22	30602	30414	3.1	2.1
A	23	Sample X23	30897	30773	2	1.3		1.3	1.8	1.4	1.7					0.6	1.1	1.4	0.9
A	24	Sample X24	30817	30762	0.9	0.6
B	1	Sample X25	33269	32977	4.4	2.9		2.9	3.7	4.8	4.6					1.2	3.1	2.9	2.8
B	2	Sample X26	33749	33626	1.8	1.2
B	3	Sample X27	36847	36780	0.9	0.6		0.6	0.9	1.7	1.5					-0.08476	1.2	3.2	0.6
B	4	Sample X28	35388	35397	-0.1	-0.08476
B	5	Sample X29	35601	35636	-0.5	-0.3		-0.3	0.8	1.7	0.7					-1.1	0.7	1.2	0.4
B	6	Sample X30	34482	34592	-1.6	-1.1
B	7	Sample X31	35381	35427	-0.6	-0.4		-0.4	0.7	1.8	1.5					-1.9	-0.6	1.7	-0.038241
B	8	Sample X32	34444	34636	-2.8	-1.9
B	9	Sample X33	35170	35292	-1.7	-1.2		-1.2	1	0.6	0					-0.4	-0.5	1.6	0.5
B	10	Sample X34	34812	34851	-0.6	-0.4
B	11	Sample X35	35380	35476	-1.4	-0.9		-0.9	0.8	0.4	1.1					-0.2	-0.057073	0.5	1
B	12	Sample X36	34775	34794	-0.3	-0.2
B	13	Sample X37	36161	36250	-1.2	-0.8		-0.8	0.1	0.6	1.3					-0.9	-0.2	-1.1	0.5
B	14	Sample X38	35727	35829	-1.4	-0.9
B	15	Sample X39	36003	36116	-1.6	-1		-1	0.3	-0.3	0.5					-0.6	-0.2	-0.011719	0.3
B	16	Sample X40	36215	36278	-0.9	-0.6
B	17	Sample X41	37171	37208	-0.5	-0.3		-0.3	0.4	-0.093504	0.3					-0.9	-0.3	0.4	-0.8
B	18	Sample X42	36363	36466	-1.4	-0.9
B	19	Sample X43	37472	37555	-1.1	-0.7		-0.7	-0.6	-0.1	-0.3					-0.2	-1.5	-0.5	-0.3
B	20	Sample X44	36719	36739	-0.3	-0.2
B	21	Sample X45	37965	37970	-0.065846	-0.043896		-0.043896	-0.8	0.9	-0.3					-1.9	-0.6	-1.3	0
B	22	Sample X46	37497	37712	-2.9	-1.9
B	23	Sample X47	37947	37959	-0.2	-0.1		-0.1	-1.2	0.6	-0.4					-2.2	0.4	-0.7	-0.4
B	24	Sample X48	36462	36708	-3.4	-2.2
C	1	Sample X49	27071	21941	104.7	72.3		72.3	73.3	74.9	73.7					60.9	65	63.2	62.1
C	2	Sample X50	28766	24084	88.6	60.9
C	3	Sample X51	28443	24058	83.5	57.3		57.3	58.9	60.3	58.8					40.7	40.8	41.8	41.1
C	4	Sample X52	28043	24875	59.9	40.7
C	5	Sample X53	27863	24710	60	40.8		40.8	43.3	43.8	42.3					25.2	25.4	26.4	24.4
C	6	Sample X54	28595	26536	37.3	25.2
C	7	Sample X55	29995	27955	35.2	23.7		23.7	26.3	26.1	27.9					13.9	15.8	14.2	15
C	8	Sample X56	30535	29292	20.8	13.9
C	9	Sample X57	31383	30067	21.4	14.4		14.4	15.9	16.7	16.1					8.9	10.2	9.7	9.3
C	10	Sample X58	31575	30748	13.3	8.9
C	11	Sample X59	30482	29646	13.9	9.3		9.3	11.5	10.3	10.8					6.3	6.3	8.5	8.4
C	12	Sample X60	29313	28767	9.4	6.3
C	13	Sample X61	26552	26053	9.5	6.3		6.3	8	7.3	7.7					5	7.8	7.6	7.2
C	14	Sample X62	26431	26042	7.4	5
C	15	Sample X63	29259	28724	9.2	6.2		6.2	6.6	7.2	6.6					6.6	4.8	6.9	6
C	16	Sample X64	27962	27415	9.9	6.6
C	17	Sample X65	29627	29021	10.3	6.9		6.9	6.5	6.2	6.1					5.7	5.4	7.5	5.9
C	18	Sample X66	29423	28926	8.5	5.7
C	19	Sample X67	30178	29702	7.9	5.3		5.3	5.6	6.2	6					5.6	5.1	7.5	6.3
C	20	Sample X68	29003	28519	8.4	5.6
C	21	Sample X69	27460	27038	7.7	5.2		5.2	5.2	6.6	5.3					5.1	4.7	6.2	5.6
C	22	Sample X70	26798	26395	7.6	5.1
C	23	Sample X71	27875	27464	7.4	5		5	4.7	6.4	5.7					4.8	4.5	5.8	5.4
C	24	Sample X72	28002	27604	7.2	4.8
D	1	Sample X73	22935	18863	97.4	67.1		67.1	66.8	68.7	68.3					75.5	80.2	81.4	79.7
D	2	Sample X74	26956	21651	109.1	75.5
D	3	Sample X75	25351	21826	74.7	51.1		51.1	52.7	53.4	54.1					55.2	58.1	60.4	59.9
D	4	Sample X76	27469	23370	80.6	55.2
D	5	Sample X77	25164	22732	50.8	34.4		34.4	36.3	37.7	37.1					35	38.8	39.7	38.5
D	6	Sample X78	27298	24616	51.7	35
D	7	Sample X79	22977	21600	30.9	20.8		20.8	21.8	22.7	22					18.6	21	22.3	21
D	8	Sample X80	26260	24845	27.7	18.6
D	9	Sample X81	21236	20490	17.9	12		12	14.4	13.9	14					10.6	12.7	13.1	13
D	10	Sample X82	25193	24409	15.8	10.6
D	11	Sample X83	22446	21908	12.1	8.1		8.1	8.3	8.4	9.2					6.1	7.7	9.3	8.5
D	12	Sample X84	25509	25047	9.1	6.1
D	13	Sample X85	23033	22661	8.1	5.4		5.4	6.7	7.7	7					4	7.7	7.5	6.8
D	14	Sample X86	27041	26717	6	4
D	15	Sample X87	25758	25369	7.6	5.1		5.1	4.9	6.3	6.7					4.5	6.5	6.5	6.3
D	16	Sample X88	28893	28510	6.7	4.5
D	17	Sample X89	26028	25632	7.7	5.1		5.1	4.2	6.4	5					4.4	6	6.1	6.1
D	18	Sample X90	29885	29491	6.6	4.4
D	19	Sample X91	26408	25983	8.1	5.4		5.4	5.2	6.6	3.9					3.5	4.9	5.4	5.4
D	20	Sample X92	30657	30334	5.3	3.5
D	21	Sample X93	25324	24992	6.6	4.4		4.4	4.3	5.9	6.5					5	3.3	5.6	5.8
D	22	Sample X94	28889	28461	7.5	5
D	23	Sample X95	26254	25980	5.2	3.5		3.5	5.2	4.1	4.8					4.4	4.3	5.5	4.4
D	24	Sample X96	29439	29058	6.5	4.4
E	1	Sample X97	26419	25581	16.1	10.8		10.8	12.3	12.6	11					6.3	8	8.6	8.5
E	2	Sample X98	29951	29391	9.4	6.3
E	3	Sample X99	28830	28558	4.7	3.2		3.2	4.4	4.8	4.9					1	2.6	3.7	3.2
E	4	Sample X100	31729	31635	1.5	1
E	5	Sample X101	30474	30441	0.5	0.4		0.4	1.3	2.5	1.9					0.3	1.7	2	1
E	6	Sample X102	32958	32931	0.4	0.3
E	7	Sample X103	30599	30700	-1.6	-1.1		-1.1	0.9	1.4	1					-1	1.8	1.5	1.8
E	8	Sample X104	35056	35159	-1.5	-1
E	9	Sample X105	30724	30896	-2.8	-1.9		-1.9	1.7	0.7	0.4					-1.3	-0.5	0.3	0.6
E	10	Sample X106	34669	34809	-2	-1.3
E	11	Sample X107	30681	30751	-1.1	-0.8		-0.8	0.9	0.8	0.7					-0.3	0.2	-0.3	0.7
E	12	Sample X108	34626	34662	-0.5	-0.3
E	13	Sample X109	30618	30744	-2.1	-1.4		-1.4	1	0.012354	1.2					0.2	-1	-0.01278	0.3
E	14	Sample X110	36785	36763	0.3	0.2
E	15	Sample X111	32099	32128	-0.5	-0.3		-0.3	0.7	0.4	1.3					-0.8	-0.2	-0.3	-0.08067
E	16	Sample X112	35438	35525	-1.2	-0.8
E	17	Sample X113	32004	32019	-0.2	-0.2		-0.2	0.2	-0.4	-0.4					-1.2	-0.5	0.8	0.015594
E	18	Sample X114	36484	36618	-1.8	-1.2
E	19	Sample X115	32201	32315	-1.8	-1.2		-1.2	-0.6	0.4	-0.4					-0.4	0.2	0.6	0.4
E	20	Sample X116	35525	35569	-0.6	-0.4
E	21	Sample X117	30942	31033	-1.5	-1		-1	0.6	-1.5	0.8					-0.6	0.3	-0.1	0.4
E	22	Sample X118	36004	36068	-0.9	-0.6
E	23	Sample X119	27302	27346	-0.8	-0.5		-0.5	-0.6	-0.8	-1.1					-2	-0.3	0.3	-1.7
E	24	Sample X120	34810	35016	-3	-2
F	1	Sample X121	31471	28584	48.1	32.6		32.6	37.1	85.2	32.7					17.8	20.1	20.5	20
F	2	Sample X122	33042	31341	26.4	17.8
F	3	Sample X123	10140	9585	28.1	18.9		18.9	19.4	20.1	18.4					8.9	9.6	9.1	10.2
F	4	Sample X124	32436	31581	13.4	8.9
F	5	Sample X125	33161	32404	11.5	7.7		7.7	10	10.1	9.6					3.8	6	6	5.5
F	6	Sample X126	34749	34353	5.7	3.8
F	7	Sample X127	31620	31341	4.4	3		3	6.4	4.6	6.3					2.8	3.8	3.2	2.8
F	8	Sample X128	36329	36027	4.2	2.8
F	9	Sample X129	33519	33283	3.5	2.4		2.4	4.3	3.7	3.4					1.5	2.4	3	3.4
F	10	Sample X130	32497	32347	2.3	1.5
F	11	Sample X131	34144	33967	2.6	1.7		1.7	3.1	3.2	3.5					1.6	1.8	2.6	3.6
F	12	Sample X132	34355	34186	2.5	1.6
F	13	Sample X133	33827	33706	1.8	1.2		1.2	2.3	2.7	2.8					0.1	2.8	3	2.8
F	14	Sample X134	33477	33465	0.2	0.1
F	15	Sample X135	35598	35483	1.6	1.1		1.1	1.7	1.4	2					2.2	2.9	2.5	2.3
F	16	Sample X136	33969	33741	3.4	2.2
F	17	Sample X137	34995	34814	2.6	1.7		1.7	2.2	2.4	2.2					1.3	1.6	2.3	2
F	18	Sample X138	34279	34142	2	1.3
F	19	Sample X139	34626	34583	0.6	0.4		0.4	0.7	2.6	1.4					1.1	2.7	1.7	2.4
F	20	Sample X140	34357	34246	1.6	1.1
F	21	Sample X141	35471	35340	1.8	1.2		1.2	1.3	3	1.6					0.9	1.5	3.1	2.4
F	22	Sample X142	33741	33650	1.4	0.9
F	23	Sample X143	35947	35776	2.4	1.6		1.6	0.7	2.2	1.9					0.2	1.6	1	2.4
F	24	Sample X144	33826	33803	0.3	0.2
G	1	Sample X145	33438	30203	50.8	34.5		34.5	36.3	36.4	-0.5					21.5	22.9	24.6	22
G	2	Sample X146	33033	30990	31.9	21.5
G	3	Sample X147	36321	34381	27.4	18.5		18.5	20.3	19.6	-1.2					9.8	10.2	11.3	10.7
G	4	Sample X148	32083	31161	14.6	9.8
G	5	Sample X149	37161	36228	12.7	8.5		8.5	9.5	8.6	-1.2					3.6	5	3.4	3.8
G	6	Sample X150	35295	34918	5.4	3.6
G	7	Sample X151	33526	33141	5.8	3.9		3.9	3.8	2.6	-0.9					2.3	2.5	1.8	1.7
G	8	Sample X152	35443	35199	3.5	2.3
G	9	Sample X153	34369	34400	-0.5	-0.3		-0.3	2.2	1.7	0.7					0.3	0.8	0.1	-1.6
G	10	Sample X154	34626	34600	0.4	0.3
G	11	Sample X155	35438	35372	0.9	0.6		0.6	-0.2	0.06512	0.8					-1	1.3	-0.2	0.8
G	12	Sample X156	35492	35594	-1.4	-1
G	13	Sample X157	35822	35899	-1.1	-0.7		-0.7	0.4	0.6	0.8					-0.2	-0.3	0.1	0.4
G	14	Sample X158	35372	35388	-0.2	-0.2
G	15	Sample X159	35907	35917	-0.1	-0.092815		-0.092815	-0.5	1	0.2					-0.6	0.6	0.2	-0.2
G	16	Sample X160	36642	36713	-1	-0.6
G	17	Sample X161	37516	37466	0.7	0.4		0.4	-0.091788	0.1	0.4					-1.3	0.6	0.036776	-0.7
G	18	Sample X162	36136	36277	-1.9	-1.3
G	19	Sample X163	34849	34995	-2.1	-1.4		-1.4	-0.4	-0.7	-0.2					-0.3	-0.5	0.6	0.2
G	20	Sample X164	35435	35464	-0.4	-0.3
G	21	Sample X165	36476	36585	-1.5	-1		-1	0.2	0.8	-0.5					-0.4	-0.7	0.1	0.6
G	22	Sample X166	35714	35757	-0.6	-0.4
G	23	Sample X167	36446	36592	-2	-1.3		-1.3	1.2	-0.4	-1.1					-1.9	-1.6	-1.1	-0.5
G	24	Sample X168	35762	35964	-2.8	-1.9
H	1	Sample X169	34500	32576	28.7	19.3		19.3	21	21.2	-0.8					11.4	11.8	13	-3.1
H	2	Sample X170	31935	30865	17	11.4
H	3	Sample X171	38932	38061	11.3	7.6		7.6	10.6	10	-1.2					3.5	4.8	4.6	-3.8
H	4	Sample X172	37580	37186	5.3	3.5
H	5	Sample X173	37341	36957	5.2	3.5		3.5	3.4	3	-1.8					1	2.3	1	-1.5
H	6	Sample X174	37333	37220	1.5	1
H	7	Sample X175	36232	36198	0.5	0.3		0.3	0.6	1.5	-0.6					1.1	0.6	1.5	-2.7
H	8	Sample X176	34781	34667	1.6	1.1
H	9	Sample X177	35418	35500	-1.2	-0.8		-0.8	-0.3	0.7	-0.5					-0.7	-0.4	0.0583	-0.8
H	10	Sample X178	35931	36011	-1.1	-0.7
H	11	Sample X179	36857	36796	0.8	0.6		0.6	-0.4	1	-0.5					-0.9	-0.7	-0.7	-1.1
H	12	Sample X180	37856	37962	-1.4	-0.9
H	13	Sample X181	36591	36656	-0.9	-0.6		-0.6	0.3	-1	0.5					-0.7	-0.6	-0.2	-1.5
H	14	Sample X182	36845	36922	-1	-0.7
H	15	Sample X183	38077	38247	-2.2	-1.5		-1.5	-1	-0.8	0.036335					-1.3	-0.2	0.4	-1.8
H	16	Sample X184	36547	36692	-2	-1.3
H	17	Sample X185	37177	37179	-0.026898	-0.017932		-0.017932	-1.1	-0.6	-0.7					-0.9	-0.6	-0.7	-1.1
H	18	Sample X186	36276	36373	-1.3	-0.9
H	19	Sample X187	36630	36712	-1.1	-0.7		-0.7	-0.7	-0.6	0.6					-0.8	-1	-0.9	0.08579
H	20	Sample X188	38361	38450	-1.2	-0.8
H	21	Sample X189	37484	37574	-1.2	-0.8		-0.8	-0.3	-1.5	-2					-1.6	-1.5	-0.5	0.1
H	22	Sample X190	37782	37961	-2.4	-1.6
H	23	Sample X191	37129	37332	-2.7	-1.8		-1.8	-0.4	-1.3	-1.7					-1.4	-0.8	-1.7	-2.3
H	24	Sample X192	37411	37572	-2.1	-1.4
I	1	Sample X193	25762	21139	98.6	67.9
I	2	Sample X194	29007	23586	103.1	71.2
I	3	Sample X195	28585	23579	96	66.1
I	4	Sample X196	26168	21489	98.2	67.7
I	5	Sample X197	27075	22526	91.7	63.1
I	6	Sample X198	25041	20931	89.4	61.4
I	7	Sample X199	26988	22781	84.5	58
I	8	Sample X200	25586	22063	73.9	50.5
I	9	Sample X201	26361	22666	75.4	51.5
I	10	Sample X202	25182	22728	51.2	34.7
I	11	Sample X203	26183	23162	61.2	41.7
I	12	Sample X204	25897	24494	27.8	18.7
I	13	Sample X205	26940	24843	40.5	27.4
I	14	Sample X206	25863	25158	13.8	9.3
I	15	Sample X207	27757	26541	22.4	15
I	16	Sample X208	25574	25333	4.7	3.2
I	17	Sample X209	27874	27286	10.7	7.1
I	18	Sample X210	26800	26559	4.5	3
I	19	Sample X211	27531	27187	6.3	4.2
I	20	Sample X212	26659	26496	3.1	2
I	21	Sample X213	26652	26548	2	1.3
I	22	Sample X214	26110	25922	3.6	2.4
I	23	Sample X215	26641	26497	2.7	1.8
I	24	Sample X216	25366	25283	1.6	1.1
J	1	Sample X217	27203	26901	5.6	3.7
J	2	Sample X218	31456	31164	4.7	3.1
J	3	Sample X219	29089	29011	1.3	0.9
J	4	Sample X220	28846	28745	1.8	1.2
J	5	Sample X221	29037	28971	1.1	0.8
J	6	Sample X222	29591	29526	1.1	0.7
J	7	Sample X223	28891	28830	1.1	0.7
J	8	Sample X224	29206	29256	-0.9	-0.6
J	9	Sample X225	28756	28671	1.5	1
J	10	Sample X226	29584	29630	-0.8	-0.5
J	11	Sample X227	29368	29294	1.3	0.8
J	12	Sample X228	29199	29204	-0.085612	-0.057073
J	13	Sample X229	29696	29686	0.2	0.1
J	14	Sample X230	30292	30308	-0.3	-0.2
J	15	Sample X231	30521	30493	0.5	0.3
J	16	Sample X232	31173	31191	-0.3	-0.2
J	17	Sample X233	30985	30951	0.5	0.4
J	18	Sample X234	31957	31984	-0.4	-0.3
J	19	Sample X235	30943	31001	-0.9	-0.6
J	20	Sample X236	32044	32187	-2.2	-1.5
J	21	Sample X237	31198	31273	-1.2	-0.8
J	22	Sample X238	31728	31788	-0.9	-0.6
J	23	Sample X239	31213	31322	-1.7	-1.2
J	24	Sample X240	31702	31668	0.5	0.4
K	1	Sample X241	24636	19910	106.1	73.3
K	2	Sample X242	22517	18631	94.4	65
K	3	Sample X243	23830	20061	85.9	58.9
K	4	Sample X244	21982	19494	60	40.8
K	5	Sample X245	21955	19330	63.6	43.3
K	6	Sample X246	22900	21242	37.6	25.4
K	7	Sample X247	24482	22645	39	26.3
K	8	Sample X248	24923	23777	23.5	15.8
K	9	Sample X249	25225	24057	23.7	15.9
K	10	Sample X250	25614	24847	15.2	10.2
K	11	Sample X251	24399	23575	17.2	11.5
K	12	Sample X252	24346	23889	9.5	6.3
K	13	Sample X253	20949	20454	12	8
K	14	Sample X254	21731	21228	11.7	7.8
K	15	Sample X255	22782	22335	9.9	6.6
K	16	Sample X256	23879	23536	7.2	4.8
K	17	Sample X257	23372	22919	9.8	6.5
K	18	Sample X258	24259	23873	8	5.4
K	19	Sample X259	24148	23747	8.4	5.6
K	20	Sample X260	24511	24137	7.7	5.1
K	21	Sample X261	21668	21331	7.8	5.2
K	22	Sample X262	22490	22175	7.1	4.7
K	23	Sample X263	22425	22109	7.1	4.7
K	24	Sample X264	22084	21787	6.8	4.5
L	1	Sample X265	20803	17123	97	66.8
L	2	Sample X266	24154	19147	115.6	80.2
L	3	Sample X267	18999	16280	77.1	52.7
L	4	Sample X268	21318	17987	84.7	58.1
L	5	Sample X269	16527	14851	53.4	36.3
L	6	Sample X270	21876	19513	57.1	38.8
L	7	Sample X271	20214	18946	32.4	21.8
L	8	Sample X272	20844	19586	31.1	21
L	9	Sample X273	18876	18084	21.4	14.4
L	10	Sample X274	20957	20180	18.9	12.7
L	11	Sample X275	18597	18142	12.4	8.3
L	12	Sample X276	21049	20572	11.5	7.7
L	13	Sample X277	19740	19347	10.1	6.7
L	14	Sample X278	21545	21057	11.5	7.7
L	15	Sample X279	21376	21064	7.4	4.9
L	16	Sample X280	22486	22053	9.7	6.5
L	17	Sample X281	21615	21343	6.3	4.2
L	18	Sample X282	23256	22842	9	6
L	19	Sample X283	21355	21024	7.8	5.2
L	20	Sample X284	23254	22918	7.3	4.9
L	21	Sample X285	20545	20285	6.4	4.3
L	22	Sample X286	22319	22097	5	3.3
L	23	Sample X287	22490	22143	7.8	5.2
L	24	Sample X288	22225	21942	6.4	4.3
M	1	Sample X289	25198	24293	18.3	12.3
M	2	Sample X290	28277	27613	11.9	8
M	3	Sample X291	24776	24455	6.5	4.4
M	4	Sample X292	27163	26956	3.8	2.6
M	5	Sample X293	25033	24938	1.9	1.3
M	6	Sample X294	27234	27099	2.5	1.7
M	7	Sample X295	25032	24963	1.4	0.9
M	8	Sample X296	28787	28631	2.7	1.8
M	9	Sample X297	25555	25428	2.5	1.7
M	10	Sample X298	28759	28799	-0.7	-0.5
M	11	Sample X299	25915	25845	1.4	0.9
M	12	Sample X300	28385	28364	0.4	0.2
M	13	Sample X301	25501	25426	1.5	1
M	14	Sample X302	29502	29590	-1.5	-1
M	15	Sample X303	25931	25876	1.1	0.7
M	16	Sample X304	29184	29201	-0.3	-0.2
M	17	Sample X305	26850	26830	0.4	0.2
M	18	Sample X306	30139	30187	-0.8	-0.5
M	19	Sample X307	25808	25855	-0.9	-0.6
M	20	Sample X308	29323	29302	0.4	0.2
M	21	Sample X309	24727	24684	0.9	0.6
M	22	Sample X310	29401	29373	0.5	0.3
M	23	Sample X311	19727	19765	-1	-0.6
M	24	Sample X312	28379	28402	-0.4	-0.3
N	1	Sample X313	27380	24543	54.6	37.1
N	2	Sample X314	27986	26362	29.9	20.1
N	3	Sample X315	26268	24793	28.9	19.4
N	4	Sample X316	27082	26315	14.4	9.6
N	5	Sample X317	24992	24257	14.9	10
N	6	Sample X318	26314	25848	8.9	6
N	7	Sample X319	24738	24267	9.6	6.4
N	8	Sample X320	26479	26176	5.8	3.8
N	9	Sample X321	25330	25008	6.4	4.3
N	10	Sample X322	25792	25608	3.6	2.4
N	11	Sample X323	24988	24760	4.6	3.1
N	12	Sample X324	27306	27162	2.6	1.8
N	13	Sample X325	24484	24315	3.5	2.3
N	14	Sample X326	26461	26238	4.2	2.8
N	15	Sample X327	25620	25491	2.5	1.7
N	16	Sample X328	27337	27098	4.4	2.9
N	17	Sample X329	25658	25491	3.3	2.2
N	18	Sample X330	28486	28350	2.4	1.6
N	19	Sample X331	25259	25206	1.1	0.7
N	20	Sample X332	28315	28090	4	2.7
N	21	Sample X333	25980	25878	2	1.3
N	22	Sample X334	27915	27793	2.2	1.5
N	23	Sample X335	26395	26342	1	0.7
N	24	Sample X336	27526	27391	2.5	1.6
O	1	Sample X337	29760	26738	53.5	36.3
O	2	Sample X338	28570	26693	34	22.9
O	3	Sample X339	28790	27109	30.1	20.3
O	4	Sample X340	27352	26530	15.3	10.2
O	5	Sample X341	27628	26858	14.1	9.5
O	6	Sample X342	27269	26862	7.5	5
O	7	Sample X343	27845	27530	5.7	3.8
O	8	Sample X344	27771	27567	3.7	2.5
O	9	Sample X345	27870	27683	3.4	2.2
O	10	Sample X346	27412	27346	1.2	0.8
O	11	Sample X347	28092	28112	-0.4	-0.2
O	12	Sample X348	28277	28170	1.9	1.3
O	13	Sample X349	28323	28291	0.6	0.4
O	14	Sample X350	28061	28085	-0.4	-0.3
O	15	Sample X351	28518	28561	-0.8	-0.5
O	16	Sample X352	28608	28556	0.9	0.6
O	17	Sample X353	29047	29055	-0.1	-0.091788
O	18	Sample X354	29277	29220	1	0.6
O	19	Sample X355	28915	28951	-0.6	-0.4
O	20	Sample X356	29362	29406	-0.7	-0.5
O	21	Sample X357	29414	29400	0.2	0.2
O	22	Sample X358	29264	29328	-1.1	-0.7
O	23	Sample X359	29607	29497	1.9	1.2
O	24	Sample X360	28972	29110	-2.4	-1.6
P	1	Sample X361	28472	26747	31.2	21
P	2	Sample X362	28251	27278	17.5	11.8
P	3	Sample X363	27555	26699	15.8	10.6
P	4	Sample X364	28674	28262	7.2	4.8
P	5	Sample X365	28200	27913	5.1	3.4
P	6	Sample X366	28420	28222	3.5	2.3
P	7	Sample X367	27963	27913	0.9	0.6
P	8	Sample X368	28683	28634	0.9	0.6
P	9	Sample X369	28229	28257	-0.5	-0.3
P	10	Sample X370	28465	28500	-0.6	-0.4
P	11	Sample X371	28516	28553	-0.6	-0.4
P	12	Sample X372	29288	29352	-1.1	-0.7
P	13	Sample X373	29096	29068	0.5	0.3
P	14	Sample X374	29840	29897	-1	-0.6
P	15	Sample X375	29411	29500	-1.5	-1
P	16	Sample X376	30299	30320	-0.3	-0.2
P	17	Sample X377	29734	29836	-1.7	-1.1
P	18	Sample X378	30562	30618	-0.9	-0.6
P	19	Sample X379	30492	30556	-1	-0.7
P	20	Sample X380	30420	30507	-1.4	-1
P	21	Sample X381	30535	30560	-0.4	-0.3
P	22	Sample X382	30756	30896	-2.3	-1.5
P	23	Sample X383	30748	30781	-0.5	-0.4
P	24	Sample X384	30558	30632	-1.2	-0.8

## Sheet: Sheet1
	4ebp				sgs				s6k				kali-7				glu1				glu2				nr1-1				nr2													4ebp				sgs
753.3	63.7	67.9	69.8	67.4	2.9	3.7	4.8	4.6	72.3	73.3	74.9	73.7	67.1	66.8	68.7	68.3	10.8	12.3	12.6	11	32.6	37.1	85.2	32.7	34.5	36.3	36.4	-0.5	19.3	21	21.2	-0.8									598.13	71.1	71.2	74.2	72.6	1.2	3.1	2.9	2.8
301.32	64.2	66.1	66.2	66.2	0.6	0.9	1.7	1.5	57.3	58.9	60.3	58.8	51.1	52.7	53.4	54.1	3.2	4.4	4.8	4.9	18.9	19.4	20.1	18.4	18.5	20.3	19.6	-1.2	7.6	10.6	10	-1.2									239.252	65.4	67.7	68.4	69.3	-0.08476	1.2	3.2	0.6
120.528	60.7	63.1	65.4	62.7	-0.3	0.8	1.7	0.7	40.8	43.3	43.8	42.3	34.4	36.3	37.7	37.1	0.4	1.3	2.5	1.9	7.7	10	10.1	9.6	8.5	9.5	8.6	-1.2	3.5	3.4	3	-1.8									95.7008	60.2	61.4	62.5	61.9	-1.1	0.7	1.2	0.4
48.2112	58.2	58	59.7	60.1	-0.4	0.7	1.8	1.5	23.7	26.3	26.1	27.9	20.8	21.8	22.7	22	-1.1	0.9	1.4	1	3	6.4	4.6	6.3	3.9	3.8	2.6	-0.9	0.3	0.6	1.5	-0.6									38.2803	49	50.5	51.4	51.3	-1.9	-0.6	1.7	-0.038241
19.2845	50.9	51.5	53.4	53	-1.2	1	0.6	0	14.4	15.9	16.7	16.1	12	14.4	13.9	14	-1.9	1.7	0.7	0.4	2.4	4.3	3.7	3.4	-0.3	2.2	1.7	0.7	-0.8	-0.3	0.7	-0.5									15.3121	34.4	34.7	36.3	35.6	-0.4	-0.5	1.6	0.5
7.71379	39.8	41.7	42.5	42.2	-0.9	0.8	0.4	1.1	9.3	11.5	10.3	10.8	8.1	8.3	8.4	9.2	-0.8	0.9	0.8	0.7	1.7	3.1	3.2	3.5	0.6	-0.2	0.06512	0.8	0.6	-0.4	1	-0.5									6.12485	18.2	18.7	21.4	21.5	-0.2	-0.057073	0.5	1
3.08552	25.8	27.4	28.8	28.3	-0.8	0.1	0.6	1.3	6.3	8	7.3	7.7	5.4	6.7	7.7	7	-1.4	1	0.012354	1.2	1.2	2.3	2.7	2.8	-0.7	0.4	0.6	0.8	-0.6	0.3	-1	0.5									2.44994	9.3	9.3	10.7	10.2	-0.9	-0.2	-1.1	0.5
1.23421	13.6	15	15.7	14.1	-1	0.3	-0.3	0.5	6.2	6.6	7.2	6.6	5.1	4.9	6.3	6.7	-0.3	0.7	0.4	1.3	1.1	1.7	1.4	2	-0.092815	-0.5	1	0.2	-1.5	-1	-0.8	0.036335									0.979976	4.2	3.2	5.3	5.9	-0.6	-0.2	-0.011719	0.3
0.493683	7.3	7.1	8.3	6.6	-0.3	0.4	-0.093504	0.3	6.9	6.5	6.2	6.1	5.1	4.2	6.4	5	-0.2	0.2	-0.4	-0.4	1.7	2.2	2.4	2.2	0.4	-0.091788	0.1	0.4	-0.017932	-1.1	-0.6	-0.7									0.39199	2.5	3	2.6	4.1	-0.9	-0.3	0.4	-0.8
0.197473	1.9	4.2	3.9	3.6	-0.7	-0.6	-0.1	-0.3	5.3	5.6	6.2	6	5.4	5.2	6.6	3.9	-1.2	-0.6	0.4	-0.4	0.4	0.7	2.6	1.4	-1.4	-0.4	-0.7	-0.2	-0.7	-0.7	-0.6	0.6									0.156796	2.4	2	2.8	2.3	-0.2	-1.5	-0.5	-0.3
0.0789892	1.8	1.3	2.7	2.5	-0.043896	-0.8	0.9	-0.3	5.2	5.2	6.6	5.3	4.4	4.3	5.9	6.5	-1	0.6	-1.5	0.8	1.2	1.3	3	1.6	-1	0.2	0.8	-0.5	-0.8	-0.3	-1.5	-2									0.0627185	2.1	2.4	3.2	2.1	-1.9	-0.6	-1.3	0
0	1.3	1.8	1.4	1.7	-0.1	-1.2	0.6	-0.4	5	4.7	6.4	5.7	3.5	5.2	4.1	4.8	-0.5	-0.6	-0.8	-1.1	1.6	0.7	2.2	1.9	-1.3	1.2	-0.4	-1.1	-1.8	-0.4	-1.3	-1.7									0	0.6	1.1	1.4	0.9	-2.2	0.4	-0.7	-0.4
753.3	73.7	77.9	79.8	77.4	12.9	13.7	14.8	14.6	82.3	83.3	84.9	83.7	77.1	76.8	78.7	78.3	20.8	22.3	22.6	21	42.6	47.1	95.2	42.7	44.5	46.3	46.4	9.5	29.3	31	31.2	9.2									753.3	81.1	81.2	84.2	82.6	11.2	13.1	12.9	12.8
376.65	74.2	76.1	76.2	76.2	10.6	10.9	11.7	11.5	67.3	68.9	70.3	68.8	61.1	62.7	63.4	64.1	13.2	14.4	14.8	14.9	28.9	29.4	30.1	28.4	28.5	30.3	29.6	8.8	17.6	20.6	20	8.8									376.65	75.4	77.7	78.4	79.3	9.91524	11.2	13.2	10.6
188.325	70.7	73.1	75.4	72.7	9.7	10.8	11.7	10.7	50.8	53.3	53.8	52.3	44.4	46.3	47.7	47.1	10.4	11.3	12.5	11.9	17.7	20	20.1	19.6	18.5	19.5	18.6	8.8	13.5	13.4	13	8.2									188.325	70.2	71.4	72.5	71.9	8.9	10.7	11.2	10.4
94.1625	68.2	68	69.7	70.1	9.6	10.7	11.8	11.5	33.7	36.3	36.1	37.9	30.8	31.8	32.7	32	8.9	10.9	11.4	11	13	16.4	14.6	16.3	13.9	13.8	12.6	9.1	10.3	10.6	11.5	9.4									94.1625	59	60.5	61.4	61.3	8.1	9.4	11.7	9.96176
47.0812	60.9	61.5	63.4	63	8.8	11	10.6	10	24.4	25.9	26.7	26.1	22	24.4	23.9	24	8.1	11.7	10.7	10.4	12.4	14.3	13.7	13.4	9.7	12.2	11.7	10.7	9.2	9.7	10.7	9.5									47.0812	44.4	44.7	46.3	45.6	9.6	9.5	11.6	10.5
23.5406	49.8	51.7	52.5	52.2	9.1	10.8	10.4	11.1	19.3	21.5	20.3	20.8	18.1	18.3	18.4	19.2	9.2	10.9	10.8	10.7	11.7	13.1	13.2	13.5	10.6	9.8	10.0651	10.8	10.6	9.6	11	9.5									23.5406	28.2	28.7	31.4	31.5	9.8	9.94293	10.5	11
11.7703	35.8	37.4	38.8	38.3	9.2	10.1	10.6	11.3	16.3	18	17.3	17.7	15.4	16.7	17.7	17	8.6	11	10.0124	11.2	11.2	12.3	12.7	12.8	9.3	10.4	10.6	10.8	9.4	10.3	9	10.5									11.7703	19.3	19.3	20.7	20.2	9.1	9.8	8.9	10.5
5.88516	23.6	25	25.7	24.1	9	10.3	9.7	10.5	16.2	16.6	17.2	16.6	15.1	14.9	16.3	16.7	9.7	10.7	10.4	11.3	11.1	11.7	11.4	12	9.90719	9.5	11	10.2	8.5	9	9.2	10.0363									5.88516	14.2	13.2	15.3	15.9	9.4	9.8	9.98828	10.3
2.94258	17.3	17.1	18.3	16.6	9.7	10.4	9.9065	10.3	16.9	16.5	16.2	16.1	15.1	14.2	16.4	15	9.8	10.2	9.6	9.6	11.7	12.2	12.4	12.2	10.4	9.90821	10.1	10.4	9.98207	8.9	9.4	9.3									2.94258	12.5	13	12.6	14.1	9.1	9.7	10.4	9.2
1.47129	11.9	14.2	13.9	13.6	9.3	9.4	9.9	9.7	15.3	15.6	16.2	16	15.4	15.2	16.6	13.9	8.8	9.4	10.4	9.6	10.4	10.7	12.6	11.4	8.6	9.6	9.3	9.8	9.3	9.3	9.4	10.6									1.47129	12.4	12	12.8	12.3	9.8	8.5	9.5	9.7
0.735645	11.8	11.3	12.7	12.5	9.9561	9.2	10.9	9.7	15.2	15.2	16.6	15.3	14.4	14.3	15.9	16.5	9	10.6	8.5	10.8	11.2	11.3	13	11.6	9	10.2	10.8	9.5	9.2	9.7	8.5	8									0.735645	12.1	12.4	13.2	12.1	8.1	9.4	8.7	10
0	11.3	11.8	11.4	11.7	9.9	8.8	10.6	9.6	15	14.7	16.4	15.7	13.5	15.2	14.1	14.8	9.5	9.4	9.2	8.9	11.6	10.7	12.2	11.9	8.7	11.2	9.6	8.9	8.2	9.6	8.7	8.3									0	10.6	11.1	11.4	10.9	7.8	10.4	9.3	9.6
753.3																																									753.3
376.65																																									376.65
188.325																																									188.325
94.1625																																									94.1625
47.0812																																									47.0812
23.5406																																									23.5406
11.7703																																									11.7703
5.88516																																									5.88516
2.94258																																									2.94258
1.47129																																									1.47129
0.735645																																									0.735645
0																																									0
753.3																																									753.3
376.65																																									376.65
188.325																																									188.325
94.1625																																									94.1625
47.0812																																									47.0812
23.5406																																									23.5406
11.7703																																									11.7703
5.88516																																									5.88516
2.94258																																									2.94258
1.47129																																									1.47129
0.735645																																									0.735645
0																																									0
753.3																																									753.3
376.65																																									376.65
188.325																																									188.325
94.1625																																									94.1625
47.0812																																									47.0812
23.5406																																									23.5406
11.7703																																									11.7703
5.88516																																									5.88516
2.94258																																									2.94258
1.47129																																									1.47129
0.735645																																									0.735645
0																																									0
753.3																																									753.3
376.65																																									376.65
188.325																																									188.325
94.1625																																									94.1625
47.0812																																									47.0812
23.5406																																									23.5406
11.7703																																									11.7703
5.88516																																									5.88516
2.94258																																									2.94258
1.47129																																									1.47129
0.735645																																									0.735645
0																																									0
753.3																																									753.3
376.65																																									376.65
188.325																																									188.325
94.1625																																									94.1625
47.0812																																									47.0812
23.5406																																									23.5406
11.7703																																									11.7703
5.88516																																									5.88516
2.94258																																									2.94258
1.47129																																									1.47129
0.735645																																									0.735645
0																																									0
753.3																																									753.3
376.65																																									376.65
188.325																																									188.325
94.1625																																									94.1625
47.0812																																									47.0812
23.5406																																									23.5406
11.7703																																									11.7703
5.88516																																									5.88516
2.94258																																									2.94258
1.47129																																									1.47129
0.735645																																									0.735645
0																																									0
[truncated: 24 more columns]
