# Supplementary material for: PDZ-directed substrate recruitment is the primary determinant of specific 4E-BP1 dephosphorylation by PP1-Neurabin
Source: eLife journal article supplement (doi:10.7554/elife.103403), 2024-11-20
Supplement: fig4-data3 [file 240415-rep3-4.xlsx]

## Sheet: End point
Well Row	Well Col	Content	Raw Data (parallel)	Raw Data (perpendicular)	Polarization based on Raw Data (F: 482-16 / F: 530-40)	Anisotropy based on Raw Data (F: 482-16 / F: 530-40)
A	1	Sample X1	27106	22123	101.2	69.8		69.8	67.4			74.2	72.6
A	2	Sample X2	24299	19591	107.3	74.2
A	3	Sample X3	27074	22324	96.2	66.2		66.2	66.2			68.4	69.3
A	4	Sample X4	24785	20309	99.3	68.4
A	5	Sample X5	26033	21515	95	65.4		65.4	62.7			62.5	61.9
A	6	Sample X6	25476	21229	90.9	62.5
A	7	Sample X7	26033	21870	86.9	59.7		59.7	60.1			51.4	51.3
A	8	Sample X8	25004	21507	75.2	51.4
A	9	Sample X9	25385	21709	78.1	53.4		53.4	53			36.3	35.6
A	10	Sample X10	24764	22251	53.5	36.3
A	11	Sample X11	25306	22334	62.4	42.5		42.5	42.2			21.4	21.5
A	12	Sample X12	24172	22684	31.8	21.4
A	13	Sample X13	25750	23647	42.6	28.8		28.8	28.3			10.7	10.2
A	14	Sample X14	24191	23434	15.9	10.7
A	15	Sample X15	26407	25203	23.3	15.7		15.7	14.1			5.3	5.9
A	16	Sample X16	24891	24496	8	5.3
A	17	Sample X17	26575	25925	12.4	8.3		8.3	6.6			2.6	4.1
A	18	Sample X18	25287	25091	3.9	2.6
A	19	Sample X19	25833	25535	5.8	3.9		3.9	3.6			2.8	2.3
A	20	Sample X20	25248	25038	4.2	2.8
A	21	Sample X21	25142	24942	4	2.7		2.7	2.5			3.2	2.1
A	22	Sample X22	24712	24478	4.8	3.2
A	23	Sample X23	25086	24978	2.2	1.4		1.4	1.7			1.4	0.9
A	24	Sample X24	24249	24151	2	1.4
B	1	Sample X25	26291	25913	7.2	4.8		4.8	4.6			2.9	2.8
B	2	Sample X26	27490	27249	4.4	2.9
B	3	Sample X27	26483	26349	2.5	1.7		1.7	1.5			3.2	0.6
B	4	Sample X28	27280	27019	4.8	3.2
B	5	Sample X29	26810	26676	2.5	1.7		1.7	0.7			1.2	0.4
B	6	Sample X30	27817	27716	1.8	1.2
B	7	Sample X31	27970	27816	2.8	1.8		1.8	1.5			1.7	-0.038241
B	8	Sample X32	27713	27576	2.5	1.7
B	9	Sample X33	27515	27469	0.8	0.6		0.6	0			1.6	0.5
B	10	Sample X34	27901	27770	2.4	1.6
B	11	Sample X35	26806	26774	0.6	0.4		0.4	1.1			0.5	1
B	12	Sample X36	28203	28157	0.8	0.5
B	13	Sample X37	27611	27560	0.9	0.6		0.6	1.3			-1.1	0.5
B	14	Sample X38	28141	28230	-1.6	-1.1
B	15	Sample X39	28229	28254	-0.4	-0.3		-0.3	0.5			-0.011719	0.3
B	16	Sample X40	28444	28445	-0.017578	-0.011719
B	17	Sample X41	28514	28522	-0.1	-0.093504		-0.093504	0.3			0.4	-0.8
B	18	Sample X42	28868	28834	0.6	0.4
B	19	Sample X43	28890	28899	-0.2	-0.1		-0.1	-0.3			-0.5	-0.3
B	20	Sample X44	29050	29092	-0.7	-0.5
B	21	Sample X45	28989	28915	1.3	0.9		0.9	-0.3			-1.3	0
B	22	Sample X46	29567	29679	-1.9	-1.3
B	23	Sample X47	29432	29383	0.8	0.6		0.6	-0.4			-0.7	-0.4
B	24	Sample X48	29579	29642	-1.1	-0.7
C	1	Sample X49	18346	14762	108.3	74.9		74.9	73.7			63.2	62.1
C	2	Sample X50	20158	16765	91.9	63.2
C	3	Sample X51	18284	15334	87.8	60.3		60.3	58.8			41.8	41.1
C	4	Sample X52	19266	17035	61.5	41.8
C	5	Sample X53	18533	16296	64.2	43.8		43.8	42.3			26.4	24.4
C	6	Sample X54	19779	18293	39	26.4
C	7	Sample X55	21084	19517	38.6	26.1		26.1	27.9			14.2	15
C	8	Sample X56	22332	21407	21.1	14.2
C	9	Sample X57	22600	21507	24.8	16.7		16.7	16.1			9.7	9.3
C	10	Sample X58	23472	22801	14.5	9.7
C	11	Sample X59	22012	21344	15.4	10.3		10.3	10.8			8.5	8.4
C	12	Sample X60	21523	20985	12.7	8.5
C	13	Sample X61	18463	18062	11	7.3		7.3	7.7			7.6	7.2
C	14	Sample X62	18469	18053	11.4	7.6
C	15	Sample X63	19822	19399	10.8	7.2		7.2	6.6			6.9	6
C	16	Sample X64	19898	19489	10.4	6.9
C	17	Sample X65	19345	18988	9.3	6.2		6.2	6.1			7.5	5.9
C	18	Sample X66	20746	20288	11.2	7.5
C	19	Sample X67	20350	19978	9.2	6.2		6.2	6			7.5	6.3
C	20	Sample X68	21134	20666	11.2	7.5
C	21	Sample X69	18340	17981	9.9	6.6		6.6	5.3			6.2	5.6
C	22	Sample X70	19575	19214	9.3	6.2
C	23	Sample X71	18603	18252	9.5	6.4		6.4	5.7			5.8	5.4
C	24	Sample X72	19425	19092	8.6	5.8
D	1	Sample X73	20631	16894	99.6	68.7		68.7	68.3			81.4	79.7
D	2	Sample X74	20336	16064	117.4	81.4
D	3	Sample X75	18379	15719	78	53.4		53.4	54.1			60.4	59.9
D	4	Sample X76	20012	16776	88	60.4
D	5	Sample X77	17248	15436	55.4	37.7		37.7	37.1			39.7	38.5
D	6	Sample X78	20950	18639	58.4	39.7
D	7	Sample X79	18494	17290	33.6	22.7		22.7	22			22.3	21
D	8	Sample X80	19465	18216	33.1	22.3
D	9	Sample X81	18360	17617	20.7	13.9		13.9	14			13.1	13
D	10	Sample X82	19737	18982	19.5	13.1
D	11	Sample X83	17803	17364	12.5	8.4		8.4	9.2			9.3	8.5
D	12	Sample X84	19918	19370	13.9	9.3
D	13	Sample X85	18293	17876	11.5	7.7		7.7	7			7.5	6.8
D	14	Sample X86	20443	19991	11.2	7.5
D	15	Sample X87	19757	19386	9.5	6.3		6.3	6.7			6.5	6.3
D	16	Sample X88	20932	20531	9.7	6.5
D	17	Sample X89	20009	19629	9.6	6.4		6.4	5			6.1	6.1
D	18	Sample X90	21958	21564	9.1	6.1
D	19	Sample X91	20093	19702	9.8	6.6		6.6	3.9			5.4	5.4
D	20	Sample X92	21593	21244	8.1	5.4
D	21	Sample X93	19363	19023	8.9	5.9		5.9	6.5			5.6	5.8
D	22	Sample X94	20386	20048	8.4	5.6
D	23	Sample X95	19955	19712	6.1	4.1		4.1	4.8			5.5	4.4
D	24	Sample X96	20119	19790	8.2	5.5
E	1	Sample X97	22701	21867	18.7	12.6		12.6	11			8.6	8.5
E	2	Sample X98	24214	23597	12.9	8.6
E	3	Sample X99	24076	23735	7.1	4.8		4.8	4.9			3.7	3.2
E	4	Sample X100	23984	23719	5.6	3.7
E	5	Sample X101	25229	25041	3.7	2.5		2.5	1.9			2	1
E	6	Sample X102	25643	25490	3	2
E	7	Sample X103	24720	24618	2.1	1.4		1.4	1			1.5	1.8
E	8	Sample X104	25680	25564	2.3	1.5
E	9	Sample X105	26893	26838	1	0.7		0.7	0.4			0.3	0.6
E	10	Sample X106	25514	25488	0.5	0.3
E	11	Sample X107	27723	27655	1.2	0.8		0.8	0.7			-0.3	0.7
E	12	Sample X108	25623	25645	-0.4	-0.3
E	13	Sample X109	26983	26982	0.018531	0.012354		0.012354	1.2			-0.01278	0.3
E	14	Sample X110	26081	26082	-0.019171	-0.01278
E	15	Sample X111	26277	26246	0.6	0.4		0.4	1.3			-0.3	-0.08067
E	16	Sample X112	25732	25753	-0.4	-0.3
E	17	Sample X113	27088	27117	-0.5	-0.4		-0.4	-0.4			0.8	0.015594
E	18	Sample X114	27063	26995	1.3	0.8
E	19	Sample X115	25700	25671	0.6	0.4		0.4	-0.4			0.6	0.4
E	20	Sample X116	25889	25843	0.9	0.6
E	21	Sample X117	25090	25204	-2.3	-1.5		-1.5	0.8			-0.1	0.4
E	22	Sample X118	25259	25268	-0.2	-0.1
E	23	Sample X119	27908	27972	-1.1	-0.8		-0.8	-1.1			0.3	-1.7
E	24	Sample X120	25329	25309	0.4	0.3
F	1	Sample X121	87	68	122.6	85.2		85.2	32.7			20.5	20
F	2	Sample X122	23852	22444	30.4	20.5
F	3	Sample X123	21746	20488	29.8	20.1		20.1	18.4			9.1	10.2
F	4	Sample X124	24448	23790	13.6	9.1
F	5	Sample X125	22969	22284	15.1	10.1		10.1	9.6			6	5.5
F	6	Sample X126	24969	24524	9	6
F	7	Sample X127	22698	22390	6.8	4.6		4.6	6.3			3.2	2.8
F	8	Sample X128	24114	23882	4.8	3.2
F	9	Sample X129	23279	23020	5.6	3.7		3.7	3.4			3	3.4
F	10	Sample X130	22629	22428	4.5	3
F	11	Sample X131	22766	22546	4.9	3.2		3.2	3.5			2.6	3.6
F	12	Sample X132	24594	24401	3.9	2.6
F	13	Sample X133	22804	22621	4	2.7		2.7	2.8			3	2.8
F	14	Sample X134	23291	23084	4.5	3
F	15	Sample X135	23349	23248	2.2	1.4		1.4	2			2.5	2.3
F	16	Sample X136	23242	23066	3.8	2.5
F	17	Sample X137	23781	23614	3.5	2.4		2.4	2.2			2.3	2
F	18	Sample X138	24680	24511	3.4	2.3
F	19	Sample X139	23380	23201	3.8	2.6		2.6	1.4			1.7	2.4
F	20	Sample X140	24392	24267	2.6	1.7
F	21	Sample X141	23854	23638	4.5	3		3	1.6			3.1	2.4
F	22	Sample X142	24802	24575	4.6	3.1
F	23	Sample X143	23935	23779	3.3	2.2		2.2	1.9			1	2.4
F	24	Sample X144	24385	24314	1.5	1
G	1	Sample X145	24073	21620	53.7	36.4		36.4	-0.5			24.6	22
G	2	Sample X146	25077	23312	36.5	24.6
G	3	Sample X147	26274	24785	29.2	19.6		19.6	-1.2			11.3	10.7
G	4	Sample X148	24739	23922	16.8	11.3
G	5	Sample X149	25062	24428	12.8	8.6		8.6	-1.2			3.4	3.8
G	6	Sample X150	25753	25492	5.1	3.4
G	7	Sample X151	25685	25485	3.9	2.6		2.6	-0.9			1.8	1.7
G	8	Sample X152	26448	26309	2.6	1.8
G	9	Sample X153	25359	25233	2.5	1.7		1.7	0.7			0.1	-1.6
G	10	Sample X154	26627	26617	0.2	0.1
G	11	Sample X155	25597	25592	0.097677	0.06512		0.06512	0.8			-0.2	0.8
G	12	Sample X156	25921	25939	-0.3	-0.2
G	13	Sample X157	26006	25960	0.9	0.6		0.6	0.8			0.1	0.4
G	14	Sample X158	25879	25871	0.2	0.1
G	15	Sample X159	26029	25950	1.5	1		1	0.2			0.2	-0.2
G	16	Sample X160	25544	25529	0.3	0.2
G	17	Sample X161	26321	26311	0.2	0.1		0.1	0.4			0.036776	-0.7
G	18	Sample X162	27194	27191	0.055162	0.036776
G	19	Sample X163	26258	26312	-1	-0.7		-0.7	-0.2			0.6	0.2
G	20	Sample X164	25407	25360	0.9	0.6
G	21	Sample X165	27015	26954	1.1	0.8		0.8	-0.5			0.1	0.6
G	22	Sample X166	24811	24803	0.2	0.1
G	23	Sample X167	27470	27504	-0.6	-0.4		-0.4	-1.1			-1.1	-0.5
G	24	Sample X168	26473	26564	-1.7	-1.1
H	1	Sample X169	27166	25509	31.5	21.2		21.2	-0.8			13	-3.1
H	2	Sample X170	27818	26757	19.4	13
H	3	Sample X171	28705	27860	14.9	10		10	-1.2			4.6	-3.8
H	4	Sample X172	27266	26891	6.9	4.6
H	5	Sample X173	29279	29018	4.5	3		3	-1.8			1	-1.5
H	6	Sample X174	29825	29732	1.6	1
H	7	Sample X175	28346	28223	2.2	1.5		1.5	-0.6			1.5	-2.7
H	8	Sample X176	28731	28606	2.2	1.5
H	9	Sample X177	29679	29614	1.1	0.7		0.7	-0.5			0.0583	-0.8
H	10	Sample X178	28591	28586	0.087448	0.0583
H	11	Sample X179	29704	29614	1.5	1		1	-0.5			-0.7	-1.1
H	12	Sample X180	28544	28602	-1	-0.7
H	13	Sample X181	30075	30161	-1.4	-1		-1	0.5			-0.2	-1.5
H	14	Sample X182	28297	28317	-0.4	-0.2
H	15	Sample X183	30190	30259	-1.1	-0.8		-0.8	0.036335			0.4	-1.8
H	16	Sample X184	28517	28486	0.5	0.4
H	17	Sample X185	29507	29559	-0.9	-0.6		-0.6	-0.7			-0.7	-1.1
H	18	Sample X186	28170	28230	-1.1	-0.7
H	19	Sample X187	29810	29866	-0.9	-0.6		-0.6	0.6			-0.9	0.08579
H	20	Sample X188	28757	28837	-1.4	-0.9
H	21	Sample X189	28416	28541	-2.2	-1.5		-1.5	-2			-0.5	0.1
H	22	Sample X190	29651	29692	-0.7	-0.5
H	23	Sample X191	30234	30355	-2	-1.3		-1.3	-1.7			-1.7	-2.3
H	24	Sample X192	30255	30413	-2.6	-1.7
I	1	Sample X193	26071	21423	97.9	67.4
I	2	Sample X194	27251	22068	105.1	72.6
I	3	Sample X195	29133	24026	96.1	66.2
I	4	Sample X196	26330	21520	100.5	69.3
I	5	Sample X197	27947	23275	91.2	62.7
I	6	Sample X198	25957	21669	90	61.9
I	7	Sample X199	26468	22206	87.6	60.1
I	8	Sample X200	25347	21808	75.1	51.3
I	9	Sample X201	25434	21779	77.4	53
I	10	Sample X202	25561	23014	52.4	35.6
I	11	Sample X203	25636	22641	62	42.2
I	12	Sample X204	25959	24354	31.9	21.5
I	13	Sample X205	26254	24143	41.9	28.3
I	14	Sample X206	25530	24762	15.3	10.2
I	15	Sample X207	27395	26271	20.9	14.1
I	16	Sample X208	26092	25635	8.8	5.9
I	17	Sample X209	27378	26845	9.8	6.6
I	18	Sample X210	27562	27222	6.2	4.1
I	19	Sample X211	26858	26568	5.4	3.6
I	20	Sample X212	26905	26722	3.4	2.3
I	21	Sample X213	25954	25758	3.8	2.5
I	22	Sample X214	26262	26096	3.2	2.1
I	23	Sample X215	25876	25741	2.6	1.7
I	24	Sample X216	25048	24982	1.3	0.9
J	1	Sample X217	23512	23190	6.9	4.6
J	2	Sample X218	25780	25563	4.2	2.8
J	3	Sample X219	26790	26671	2.2	1.5
J	4	Sample X220	26381	26337	0.8	0.6
J	5	Sample X221	26221	26169	1	0.7
J	6	Sample X222	26389	26356	0.6	0.4
J	7	Sample X223	25359	25242	2.3	1.5
J	8	Sample X224	26148	26151	-0.057362	-0.038241
J	9	Sample X225	24838	24838	0	0
J	10	Sample X226	25860	25819	0.8	0.5
J	11	Sample X227	25798	25711	1.7	1.1
J	12	Sample X228	25956	25876	1.5	1
J	13	Sample X229	23838	23745	2	1.3
J	14	Sample X230	26494	26452	0.8	0.5
J	15	Sample X231	26291	26251	0.8	0.5
J	16	Sample X232	26635	26612	0.4	0.3
J	17	Sample X233	26897	26870	0.5	0.3
J	18	Sample X234	28377	28444	-1.2	-0.8
J	19	Sample X235	26758	26781	-0.4	-0.3
J	20	Sample X236	27962	27987	-0.4	-0.3
J	21	Sample X237	27449	27476	-0.5	-0.3
J	22	Sample X238	28052	28052	0	0
J	23	Sample X239	27654	27685	-0.6	-0.4
J	24	Sample X240	28018	28051	-0.6	-0.4
K	1	Sample X241	16243	13113	106.6	73.7
K	2	Sample X242	15137	12630	90.3	62.1
K	3	Sample X243	16209	13652	85.6	58.8
K	4	Sample X244	14311	12682	60.3	41.1
K	5	Sample X245	14939	13190	62.2	42.3
K	6	Sample X246	13714	12755	36.2	24.4
K	7	Sample X247	16128	14850	41.3	27.9
K	8	Sample X248	15962	15265	22.3	15
K	9	Sample X249	17089	16291	23.9	16.1
K	10	Sample X250	16985	16521	13.8	9.3
K	11	Sample X251	15952	15445	16.1	10.8
K	12	Sample X252	15311	14932	12.5	8.4
K	13	Sample X253	13048	12752	11.5	7.7
K	14	Sample X254	12651	12380	10.8	7.2
K	15	Sample X255	14603	14316	9.9	6.6
K	16	Sample X256	13943	13693	9	6
K	17	Sample X257	13283	13043	9.1	6.1
K	18	Sample X258	13935	13692	8.8	5.9
K	19	Sample X259	15072	14803	9	6
K	20	Sample X260	14660	14387	9.4	6.3
K	21	Sample X261	13327	13117	7.9	5.3
K	22	Sample X262	13900	13669	8.4	5.6
K	23	Sample X263	13740	13506	8.6	5.7
K	24	Sample X264	13918	13696	8	5.4
L	1	Sample X265	17008	13942	99.1	68.3
L	2	Sample X266	18890	14995	114.9	79.7
L	3	Sample X267	17706	15111	79.1	54.1
L	4	Sample X268	18413	15460	87.2	59.9
L	5	Sample X269	14905	13361	54.6	37.1
L	6	Sample X270	17454	15584	56.6	38.5
L	7	Sample X271	15782	14784	32.7	22
L	8	Sample X272	16057	15087	31.1	21
L	9	Sample X273	15660	15020	20.9	14
L	10	Sample X274	16672	16039	19.4	13
L	11	Sample X275	15035	14627	13.8	9.2
L	12	Sample X276	16668	16249	12.7	8.5
L	13	Sample X277	15259	14945	10.4	7
L	14	Sample X278	17400	17052	10.1	6.8
L	15	Sample X279	16822	16489	10	6.7
L	16	Sample X280	17137	16818	9.4	6.3
L	17	Sample X281	17212	16954	7.6	5
L	18	Sample X282	18883	18539	9.2	6.1
L	19	Sample X283	17791	17584	5.9	3.9
L	20	Sample X284	18068	17780	8	5.4
L	21	Sample X285	17323	16988	9.8	6.5
L	22	Sample X286	17618	17317	8.6	5.8
L	23	Sample X287	18367	18105	7.2	4.8
L	24	Sample X288	16998	16778	6.5	4.4
M	1	Sample X289	22627	21896	16.4	11
M	2	Sample X290	19296	18811	12.7	8.5
M	3	Sample X291	20846	20541	7.4	4.9
M	4	Sample X292	20265	20074	4.7	3.2
M	5	Sample X293	26100	25950	2.9	1.9
M	6	Sample X294	19709	19650	1.5	1
M	7	Sample X295	19842	19783	1.5	1
M	8	Sample X296	19773	19669	2.6	1.8
M	9	Sample X297	22613	22588	0.6	0.4
M	10	Sample X298	20491	20454	0.9	0.6
M	11	Sample X299	22426	22379	1	0.7
M	12	Sample X300	19690	19647	1.1	0.7
M	13	Sample X301	23189	23104	1.8	1.2
M	14	Sample X302	20711	20692	0.5	0.3
M	15	Sample X303	22612	22524	1.9	1.3
M	16	Sample X304	20657	20662	-0.1	-0.08067
M	17	Sample X305	23532	23563	-0.7	-0.4
M	18	Sample X306	21377	21376	0.02339	0.015594
M	19	Sample X307	23804	23833	-0.6	-0.4
M	20	Sample X308	20854	20832	0.5	0.4
M	21	Sample X309	21171	21119	1.2	0.8
M	22	Sample X310	20684	20660	0.6	0.4
M	23	Sample X311	23146	23223	-1.7	-1.1
M	24	Sample X312	19470	19572	-2.6	-1.7
N	1	Sample X313	39716	36060	48.2	32.7
N	2	Sample X314	21486	20247	29.7	20
N	3	Sample X315	21807	20644	27.4	18.4
N	4	Sample X316	21788	21135	15.2	10.2
N	5	Sample X317	22593	21955	14.3	9.6
N	6	Sample X318	20616	20280	8.2	5.5
N	7	Sample X319	20754	20364	9.5	6.3
N	8	Sample X320	20379	20206	4.3	2.8
N	9	Sample X321	20917	20703	5.1	3.4
N	10	Sample X322	19545	19349	5	3.4
N	11	Sample X323	20630	20413	5.3	3.5
N	12	Sample X324	20524	20302	5.4	3.6
N	13	Sample X325	20361	20192	4.2	2.8
N	14	Sample X326	19544	19378	4.3	2.8
N	15	Sample X327	21106	20979	3	2
N	16	Sample X328	19640	19504	3.5	2.3
N	17	Sample X329	20688	20555	3.2	2.2
N	18	Sample X330	22454	22323	2.9	2
N	19	Sample X331	20395	20308	2.1	1.4
N	20	Sample X332	20951	20798	3.7	2.4
N	21	Sample X333	21185	21083	2.4	1.6
N	22	Sample X334	19907	19762	3.7	2.4
N	23	Sample X335	21928	21801	2.9	1.9
N	24	Sample X336	19596	19458	3.5	2.4
O	1	Sample X337	17733	17758	-0.7	-0.5
O	2	Sample X338	19803	18551	32.6	22
O	3	Sample X339	18576	18644	-1.8	-1.2
O	4	Sample X340	20111	19478	16	10.7
O	5	Sample X341	16870	16930	-1.8	-1.2
O	6	Sample X342	20034	19807	5.7	3.8
O	7	Sample X343	17650	17698	-1.4	-0.9
O	8	Sample X344	20395	20289	2.6	1.7
O	9	Sample X345	18336	18300	1	0.7
O	10	Sample X346	16359	16436	-2.3	-1.6
O	11	Sample X347	18659	18615	1.2	0.8
O	12	Sample X348	21627	21574	1.2	0.8
O	13	Sample X349	18191	18146	1.2	0.8
O	14	Sample X350	20979	20955	0.6	0.4
O	15	Sample X351	18478	18469	0.2	0.2
O	16	Sample X352	20699	20714	-0.4	-0.2
O	17	Sample X353	18808	18784	0.6	0.4
O	18	Sample X354	21390	21436	-1.1	-0.7
O	19	Sample X355	18968	18981	-0.3	-0.2
O	20	Sample X356	21010	20998	0.3	0.2
O	21	Sample X357	19071	19097	-0.7	-0.5
O	22	Sample X358	21222	21186	0.8	0.6
O	23	Sample X359	20724	20793	-1.7	-1.1
O	24	Sample X360	21150	21184	-0.8	-0.5
P	1	Sample X361	25458	25520	-1.2	-0.8
P	2	Sample X362	24180	24408	-4.7	-3.1
P	3	Sample X363	25641	25734	-1.8	-1.2
P	4	Sample X364	24537	24818	-5.7	-3.8
P	5	Sample X365	25453	25591	-2.7	-1.8
P	6	Sample X366	25555	25673	-2.3	-1.5
P	7	Sample X367	26635	26684	-0.9	-0.6
P	8	Sample X368	25515	25726	-4.1	-2.7
P	9	Sample X369	27205	27247	-0.8	-0.5
P	10	Sample X370	26149	26208	-1.1	-0.8
P	11	Sample X371	27149	27187	-0.7	-0.5
P	12	Sample X372	13606	13653	-1.7	-1.1
P	13	Sample X373	28448	28403	0.8	0.5
P	14	Sample X374	27820	27949	-2.3	-1.5
P	15	Sample X375	27524	27521	0.054501	0.036335
P	16	Sample X376	28818	28975	-2.7	-1.8
P	17	Sample X377	28175	28238	-1.1	-0.7
P	18	Sample X378	30641	30744	-1.7	-1.1
P	19	Sample X379	29525	29471	0.9	0.6
P	20	Sample X380	31089	31081	0.1	0.08579
P	21	Sample X381	30174	30352	-2.9	-2
P	22	Sample X382	31675	31662	0.2	0.1
P	23	Sample X383	30639	30794	-2.5	-1.7
P	24	Sample X384	32540	32770	-3.5	-2.3
