# Supplementary material for: PDZ-directed substrate recruitment is the primary determinant of specific 4E-BP1 dephosphorylation by PP1-Neurabin
Source: eLife journal article supplement (doi:10.7554/elife.103403), 2024-11-20
Supplement: fig4-data3 [file elife-103403-fig4-data3-v1.zip]

## Sheet: End point
Well Row	Well Col	Content	Raw Data (parallel)	Raw Data (perpendicular)	Polarization based on Raw Data (F: 482-16 / F: 530-40)				4ebp			sgs			s6k			kalirin			nr1-1			nr2A/B			glur1			glur2				4ebp			sgs			s6k			kalirin			nr1-1			nr2A/B
A	1	Sample X1	20471	16420	109.8	75.9881		753.3	75.9881	76.8381	73.9435	10.8652	11.3695	10.6042	67.6064	84.2195	83.9401	75.5886	76.3027	75.7617	42.9069	42.254	43.8741	27.92	26.5477	28.8476	18.2943	17.3843	20.0573	43.7145	43.3877	43.7529		77.394	79.3115	75.5232	9.59162	9.09637	8.42779	61.3503	63.4619	61.6301	78.1492	78.3613	78.5557	23.2753	22.8394	23.9548	14.2249
A	2	Sample X2	17353	13864	111.8	77.394		376.65	72.3035	74.4943	71.6093	9.88234	8.1988	9.84406	73.7714	74.7737	72.5381	65.1517	64.4008	64.6112	29.5888	27.8544	28.5785	17.6471	17.5588	18.1336	12.1495	11.8058	13.0234	29.8972	29.3487	28.3509		74.3729	73.5464	70.6937	7.46584	7.63168	7.95676	45.6538	46.1326	45.342	62.0173	60.7724	61.4397	15.1512	15.0541	15.7018	9.92202
A	3	Sample X3	20775	16838	104.7	72.3035		188.325	70.7123	71.724	70.3306	8.09099	7.38201	7.55348	59.5863	60.5239	59.7151	52.1638	51.9757	50.3418	19.5511	19.0961	21.7194	11.7703	11.0215	12.3938	10.9465	9.72755	9.95669	20.4796	21.4301	19.6816		69.5191	67.0356	66.8691	6.8952	7.72011	7.16383	29.8237	35.2555	33.5592	44.8884	43.184	42.9407	10.4412	11.5474	9.68264	8.17286
A	4	Sample X4	20167	16250	107.6	74.3729		94.1625	68.4316	68.7049	67.5229	7.45099	8.6608	6.4715	45.7397	46.6716	43.5849	38.6531	38.8612	39.0779	13.6116	14.8965	14.4929	9.55224	9.94824	9.88086	9.02551	9.14978	7.25101	15.3028	14.5513	14.1858		60.2257	61.0429	59.2264	7.99649	7.10069	6.5008	23.7571	24.1658	24.7226	32.4501	32.9007	31.7374	9.46372	8.93935	7.98722	7.40264
A	5	Sample X5	16201	13190	102.4	70.7123		47.0812	64.5235	65.2712	64.6828	7.57425	7.68848	6.94183	35.1835	34.3739	33.6117	28.7466	29.1493	28.4528	10.3337	10.989	10.8416	7.62712	8.03886	8.70463	7.80476	7.35895	6.8502	12.6457	12.7025	10.5112		51.7884	51.3229	51.7788	7.99719	7.0575	6.76979	17.3031	18.4275	20.1335	23.9908	22.9823	21.8809	7.47515	8.18622	7.27839	5.89647
A	6	Sample X6	17455	14259	100.8	69.5191		23.5406	61.0166	60.1	60.6239	8.26409	8.30664	7.14667	25.5141	25.0961	24.9335	22.159	20.4109	21.9473	7.80732	9.36107	9.48642	6.01921	7.63642	6.85403	8.27602	7.84681	6.8331	8.91322	10.1403	9.19681		39.8733	39.6966	38.9398	6.4918	6.71448	6.6038	13.5248	15.1879	17.655	17.4078	17.4951	18.5664	7.64384	7.10694	7.2323	7.26819
A	7	Sample X7	19310	15823	99.3	68.4316		11.7703	52.9366	53.4256	52.9964	7.8979	6.53033	6.42395	17.408	20.9777	20.7362	16.7342	17.6225	17.9646	8.46251	7.56522	8.01547	6.33035	7.64202	6.8075	5.80779	6.48692	8.02798	10.2661	9.82767	10.0756		28.1349	28.5208	27.1889	7.42126	8.43848	8.22935	15.6788	14.6409	13.6075	14.985	16.3317	15.6962	7.5215	7.19542	8.12328	6.20671
A	8	Sample X8	18598	15599	87.7	60.2257		5.88516	43.3775	45.9763	43.1828	6.64028	7.49642	6.68977	16.681	16.8518	17.048	15.3254	16.1105	17.2387	7.64184	7.08748	7.90802	6.80137	6.33499	6.69676	7.52802	6.53991	6.90941	10.6383	9.91695	9.57165		21.1447	21.8122	20.4777	7.38243	7.27476	7.60568	13.5976	13.7519	14.3719	14.3637	14.2534	14.3404	6.69571	7.95463	7.37608	4.77713
A	9	Sample X9	18099	14996	93.8	64.5235		2.94258	34.5014	35.047	33.2555	8.27197	7.27657	7.94393	14.3207	15.0195	15.8994	13.4926	13.9754	14.6928	6.65306	7.54448	6.88949	6.41836	5.7366	6.7009	7.13902	6.80062	7.03667	9.51326	9.2225	10.5067		15.7286	15.1435	14.9394	8.17103	7.17143	6.68206	13.5798	14.1213	14.4642	13.3263	12.8984	13.7327	6.5874	6.60136	6.49712	7.16176
A	10	Sample X10	18667	16039	75.7	51.7884		1.47129	24.3201	23.9336	23.4195	7.62869	7.19648	8.18744	13.1808	13.5845	14.7901	13.443	13.6629	14.714	7.63657	7.53982	6.57342	5.73963	6.27993	6.66984	7.17098	7.33219	6.18528	8.78264	9.28129	9.60426		12.1994	12.8055	11.9634	7.07551	8.4271	7.67623	13.4223	14.559	14.0426	12.4207	12.4366	13.2178	7.08747	7.34214	7.49005	5.93769
A	11	Sample X11	18248	15271	88.8	61.0166		0.735645	16.8618	16.4234	17.3852	7.50393	7.0802	6.62272	14.6784	13.2774	14.0904	12.6277	12.4665	13.9962	6.83471	7.53522	7.26172	5.78602	6.68573	6.93068	6.93538	6.73378	6.58646	9.34558	7.86134	9.2332		10.7882	11.5145	11.3702	7.24531	8.01637	7.80446	13.106	12.0869	11.92	13.5198	12.5575	12.3901	7.5536	5.95791	6.25999	6.43017
A	12	Sample X12	19434	17281	58.6	39.8733		0	8.52788	9.89965	9.45418	7.18791	7.35614	7.93626	12.5746	13.3265	12.9433	11.8719	11.2243	14.012	6.53073	6.20076	6.40196	6.67098	5.84086	6.37745	6.42287	7.75177	6.60141	8.76364	8.6544	7.9373		8.70765	9.1126	9.97637	7.25325	7.14043	7.06621	12.5311	13.0146	12.3357	11.3893	12.0559	11.8451	6.26599	6.57527	6.68539	6.01288
A	13	Sample X13	28432	24349	77.4	52.9366
A	14	Sample X14	15255	14036	41.6	28.1349		598.13
A	15	Sample X15	14222	12519	63.7	43.3775		299.065
A	16	Sample X16	14065	13209	31.4	21.1447		149.532
A	17	Sample X17	15141	13675	50.9	34.5014		74.7662
A	18	Sample X18	16482	15728	23.4	15.7286		37.3831
A	19	Sample X19	16155	15031	36	24.3201		18.6916
A	20	Sample X20	17438	16815	18.2	12.1994		9.34578
A	21	Sample X21	14509	13799	25.1	16.8618		4.67289
A	22	Sample X22	18844	18247	16.1	10.7882		2.33645
A	23	Sample X23	19241	18757	12.7	8.52788		1.16822
A	24	Sample X24	30223	29447	13	8.70765		0.584111
B	1	Sample X25	17757	14209	111	76.8381		0	76.8381																									79.3115
B	2	Sample X26	17725	14085	114.4	79.3115			74.4943																									73.5464
B	3	Sample X27	17249	13894	107.7	74.4943			71.724																									67.0356
B	4	Sample X28	17848	14415	106.4	73.5464			68.7049																									61.0429
B	5	Sample X29	17696	14366	103.9	71.724			65.2712																									51.3229
B	6	Sample X30	17487	14386	97.3	67.0356			60.1																									39.6966
B	7	Sample X31	18663	15281	99.6	68.7049			53.4256																									28.5208
B	8	Sample X32	17230	14418	88.9	61.0429			45.9763																									21.8122
B	9	Sample X33	16599	13724	94.8	65.2712			35.047																									15.1435
B	10	Sample X34	16851	14498	75.1	51.3229			23.9336																									12.8055
B	11	Sample X35	18670	15665	87.5	60.1			16.4234																									11.5145
B	12	Sample X36	22342	19877	58.4	39.6966			9.89965																									9.1126
B	13	Sample X37	13867	11859	78.1	53.4256
B	14	Sample X38	11934	10968	42.2	28.5208
B	15	Sample X39	11606	10140	67.4	45.9763
B	16	Sample X40	12727	11929	32.4	21.8122
B	17	Sample X41	12600	11362	51.7	35.047
B	18	Sample X42	14945	14286	22.5	15.1435
B	19	Sample X43	14346	13363	35.5	23.9336
B	20	Sample X44	15431	14853	19.1	12.8055
B	21	Sample X45	14716	14014	24.4	16.4234
B	22	Sample X46	17029	16454	17.2	11.5145
B	23	Sample X47	17581	17069	14.8	9.89965
B	24	Sample X48	28456	27692	13.6	9.1126
C	1	Sample X49	22036	21333	16.2	10.8652			10.8652																									9.59162
C	2	Sample X50	19516	18965	14.3	9.59162			9.88234																									7.46584
C	3	Sample X51	19675	19103	14.8	9.88234			8.09099																									6.8952
C	4	Sample X52	20029	19587	11.2	7.46584			7.45099																									7.99649
C	5	Sample X53	18881	18430	12.1	8.09099			7.57425																									7.99719
C	6	Sample X54	20682	20260	10.3	6.8952			8.26409																									6.4918
C	7	Sample X55	20931	20470	11.1	7.45099			7.8979																									7.42126
C	8	Sample X56	22404	21875	11.9	7.99649			6.64028																									7.38243
C	9	Sample X57	22159	21663	11.3	7.57425			8.27197																									8.17103
C	10	Sample X58	23122	22576	11.9	7.99719			7.62869																									7.07551
C	11	Sample X59	22838	22281	12.3	8.26409			7.50393																									7.24531
C	12	Sample X60	23094	22650	9.7	6.4918			7.18791																									7.25325
C	13	Sample X61	33826	33037	11.8	7.8979
C	14	Sample X62	17367	16986	11.1	7.42126
C	15	Sample X63	15107	14810	9.9	6.64028
C	16	Sample X64	16953	16583	11	7.38243
C	17	Sample X65	17901	17464	12.4	8.27197
C	18	Sample X66	19777	19300	12.2	8.17103
C	19	Sample X67	21604	21117	11.4	7.62869
C	20	Sample X68	21261	20816	10.6	7.07551
C	21	Sample X69	22589	22088	11.2	7.50393
C	22	Sample X70	23010	22517	10.8	7.24531
C	23	Sample X71	23050	22560	10.7	7.18791
C	24	Sample X72	36739	35951	10.8	7.25325
D	1	Sample X73	19790	19130	17	11.3695			11.3695																									9.09637
D	2	Sample X74	19775	19245	13.6	9.09637			8.1988																									7.63168
D	3	Sample X75	20083	19597	12.2	8.1988			7.38201																									7.72011
D	4	Sample X76	21640	21152	11.4	7.63168			8.6608																									7.10069
D	5	Sample X77	21307	20842	11	7.38201			7.68848																									7.0575
D	6	Sample X78	21352	20865	11.5	7.72011			8.30664																									6.71448
D	7	Sample X79	21065	20527	12.9	8.6608			6.53033																									8.43848
D	8	Sample X80	20901	20462	10.6	7.10069			7.49642																									7.27476
D	9	Sample X81	20426	19962	11.5	7.68848			7.27657																									7.17143
D	10	Sample X82	21075	20635	10.5	7.0575			7.19648																									8.4271
D	11	Sample X83	23906	23320	12.4	8.30664			7.0802																									8.01637
D	12	Sample X84	28828	28255	10	6.71448			7.35614																									7.14043
D	13	Sample X85	15720	15416	9.8	6.53033
D	14	Sample X86	16951	16529	12.6	8.43848
D	15	Sample X87	15345	15005	11.2	7.49642
D	16	Sample X88	18130	17740	10.9	7.27476
D	17	Sample X89	17289	16917	10.9	7.27657
D	18	Sample X90	20792	20351	10.7	7.17143
D	19	Sample X91	19593	19176	10.8	7.19648
D	20	Sample X92	20875	20356	12.6	8.4271
D	21	Sample X93	19576	19166	10.6	7.0802
D	22	Sample X94	23828	23264	12	8.01637
D	23	Sample X95	21013	20556	11	7.35614
D	24	Sample X96	32813	32120	10.7	7.14043
E	1	Sample X97	5530	4542	98.1	67.6064			67.6064																									61.3503
E	2	Sample X98	12145	10154	89.3	61.3503			73.7714																									45.6538
E	3	Sample X99	14228	11484	106.7	73.7714			59.5863																									29.8237
E	4	Sample X100	14191	12410	67	45.6538			45.7397																									23.7571
E	5	Sample X101	15220	12789	86.8	59.5863			35.1835																									17.3031
E	6	Sample X102	15207	13923	44.1	29.8237			25.5141																									13.5248
E	7	Sample X103	16179	14145	67.1	45.7397			17.408																									15.6788
E	8	Sample X104	16329	15218	35.2	23.7571			16.681																									13.5976
E	9	Sample X105	16925	15256	51.9	35.1835			14.3207																									13.5798
E	10	Sample X106	16483	15656	25.7	17.3031			13.1808																									13.4223
E	11	Sample X107	17274	16016	37.8	25.5141			14.6784																									13.106
E	12	Sample X108	18782	18040	20.2	13.5248			12.5746																									12.5311
E	13	Sample X109	26869	25513	25.9	17.408
E	14	Sample X110	7192	6864	23.3	15.6788
E	15	Sample X111	8012	7624	24.8	16.681
E	16	Sample X112	8360	8028	20.3	13.5976
E	17	Sample X113	10080	9659	21.3	14.3207
E	18	Sample X114	12556	12058	20.2	13.5798
E	19	Sample X115	14172	13626	19.6	13.1808
E	20	Sample X116	14102	13549	20	13.4223
E	21	Sample X117	14306	13694	21.9	14.6784
E	22	Sample X118	15869	15261	19.5	13.106
E	23	Sample X119	16142	15548	18.7	12.5746
E	24	Sample X120	26640	25663	18.7	12.5311
F	1	Sample X121	12380	9703	121.2	84.2195			84.2195																									63.4619
F	2	Sample X122	12448	10345	92.3	63.4619			74.7737																									46.1326
F	3	Sample X123	14687	11821	108.1	74.7737			60.5239																									35.2555
F	4	Sample X124	13472	11765	67.6	46.1326			46.6716																									24.1658
F	5	Sample X125	13651	11440	88.1	60.5239			34.3739																									18.4275
F	6	Sample X126	13168	11867	52	35.2555			25.0961																									15.1879
F	7	Sample X127	13353	11643	68.4	46.6716			20.9777																									14.6409
F	8	Sample X128	12190	11347	35.8	24.1658			16.8518																									13.7519
F	9	Sample X129	11846	10703	50.7	34.3739			15.0195																									14.1213
F	10	Sample X130	12585	11914	27.4	18.4275			13.5845																									14.559
F	11	Sample X131	14758	13700	37.2	25.0961			13.2774																									12.0869
F	12	Sample X132	17571	16794	22.6	15.1879			13.3265																									13.0146
F	13	Sample X133	7616	7156	31.1	20.9777
F	14	Sample X134	8155	7807	21.8	14.6409
F	15	Sample X135	8097	7701	25.1	16.8518
F	16	Sample X136	10037	9634	20.5	13.7519
F	17	Sample X137	10127	9684	22.4	15.0195
F	18	Sample X138	12063	11566	21	14.1213
F	19	Sample X139	11468	11013	20.2	13.5845
F	20	Sample X140	11781	11281	21.7	14.559
F	21	Sample X141	12654	12163	19.8	13.2774
F	22	Sample X142	13388	12914	18	12.0869
F	23	Sample X143	13302	12784	19.9	13.3265
F	24	Sample X144	20261	19490	19.4	13.0146
G	1	Sample X145	15793	12682	109.3	75.5886			75.5886																									78.1492
G	2	Sample X146	14436	11509	112.8	78.1492			65.1517																									62.0173
G	3	Sample X147	16198	13397	94.6	65.1517			52.1638																									44.8884
G	4	Sample X148	16010	13360	90.2	62.0173			38.6531																									32.4501
G	5	Sample X149	14290	12265	76.3	52.1638			28.7466																									23.9908
G	6	Sample X150	14437	12653	65.9	44.8884			22.159																									17.4078
G	7	Sample X151	14781	13190	56.9	38.6531			16.7342																									14.985
G	8	Sample X152	15380	13974	47.9	32.4501			15.3254																									14.3637
G	9	Sample X153	15524	14258	42.5	28.7466			13.4926																									13.3263
G	10	Sample X154	15784	14700	35.6	23.9908			13.443																									12.4207
G	11	Sample X155	15788	14783	32.9	22.159			12.6277																									13.5198
G	12	Sample X156	15971	15165	25.9	17.4078			11.8719																									11.3893
G	13	Sample X157	24312	23131	24.9	16.7342
G	14	Sample X158	8248	7888	22.3	14.985
G	15	Sample X159	9460	9038	22.8	15.3254
G	16	Sample X160	8475	8120	21.4	14.3637
G	17	Sample X161	9286	8920	20.1	13.4926
G	18	Sample X162	10991	10563	19.9	13.3263
G	19	Sample X163	12655	12158	20	13.443
G	20	Sample X164	11359	10946	18.5	12.4207
G	21	Sample X165	12774	12302	18.8	12.6277
G	22	Sample X166	13218	12696	20.1	13.5198
G	23	Sample X167	13826	13345	17.7	11.8719
G	24	Sample X168	22630	21874	17	11.3893
H	1	Sample X169	15005	12025	110.2	76.3027			76.3027																									78.3613
H	2	Sample X170	13920	11091	113.1	78.3613			64.4008																									60.7724
H	3	Sample X171	14735	12213	93.6	64.4008			51.9757																									43.184
H	4	Sample X172	14647	12266	88.5	60.7724			38.8612																									32.9007
H	5	Sample X173	13997	12020	76	51.9757			29.1493																									22.9823
H	6	Sample X174	14071	12393	63.4	43.184			20.4109																									17.4951
H	7	Sample X175	14347	12795	57.2	38.8612			17.6225																									16.3317
H	8	Sample X176	14070	12767	48.6	32.9007			16.1105																									14.2534
H	9	Sample X177	13518	12401	43.1	29.1493			13.9754																									12.8984
H	10	Sample X178	14321	13377	34.1	22.9823			13.6629																									12.4366
H	11	Sample X179	15740	14814	30.3	20.4109			12.4665																									12.5575
H	12	Sample X180	19621	18626	26	17.4951			11.2243																									12.0559
H	13	Sample X181	8851	8399	26.2	17.6225
H	14	Sample X182	9042	8613	24.3	16.3317
H	15	Sample X183	8372	7980	24	16.1105
H	16	Sample X184	9549	9152	21.2	14.2534
H	17	Sample X185	9513	9125	20.8	13.9754
H	18	Sample X186	11028	10612	19.2	12.8984
H	19	Sample X187	10627	10203	20.4	13.6629
H	20	Sample X188	11180	10773	18.5	12.4366
H	21	Sample X189	12250	11803	18.6	12.4665
H	22	Sample X190	13524	13027	18.7	12.5575
H	23	Sample X191	12844	12421	16.7	11.2243
H	24	Sample X192	20359	19640	18	12.0559
I	1	Sample X193	22531	19860	63	42.9069
I	2	Sample X194	17491	16324	34.5	23.2753
I	3	Sample X195	18650	17087	43.7	29.5888
I	4	Sample X196	17907	17117	22.6	15.1512
I	5	Sample X197	17964	16950	29	19.5511
I	6	Sample X198	19066	18481	15.6	10.4412
I	7	Sample X199	20049	19252	20.3	13.6116
I	8	Sample X200	20672	20096	14.1	9.46372
I	9	Sample X201	20643	20016	15.4	10.3337
I	10	Sample X202	21679	21200	11.2	7.47515
I	11	Sample X203	21464	20969	11.7	7.80732
I	12	Sample X204	21429	20945	11.4	7.64384
I	13	Sample X205	32846	32026	12.6	8.46251
I	14	Sample X206	11291	11040	11.2	7.5215
I	15	Sample X207	12843	12553	11.4	7.64184
I	16	Sample X208	11553	11324	10	6.69571
I	17	Sample X209	13403	13139	9.9	6.65306
I	18	Sample X210	14714	14427	9.8	6.5874
I	19	Sample X211	18214	17803	11.4	7.63657
I	20	Sample X212	16742	16391	10.6	7.08747
I	21	Sample X213	17748	17389	10.2	6.83471
I	22	Sample X214	18859	18438	11.3	7.5536
I	23	Sample X215	19442	19066	9.8	6.53073
I	24	Sample X216	32049	31454	9.4	6.26599
J	1	Sample X217	20362	17982	62.1	42.254
J	2	Sample X218	18161	16971	33.9	22.8394
J	3	Sample X219	20416	18800	41.2	27.8544
J	4	Sample X220	19228	18385	22.4	15.0541
J	5	Sample X221	20460	19331	28.4	19.0961
J	6	Sample X222	20496	19802	17.2	11.5474
J	7	Sample X223	20232	19354	22.2	14.8965
J	8	Sample X224	20230	19697	13.3	8.93935
J	9	Sample X225	19592	18960	16.4	10.989
J	10	Sample X226	21148	20637	12.2	8.18622
J	11	Sample X227	24522	23846	14	9.36107
J	12	Sample X228	30587	29944	10.6	7.10694
J	13	Sample X229	12166	11894	11.3	7.56522
J	14	Sample X230	12406	12142	10.8	7.19542
J	15	Sample X231	11686	11441	10.6	7.08748
J	16	Sample X232	14091	13760	11.9	7.95463
J	17	Sample X233	14262	13944	11.3	7.54448
J	18	Sample X234	15860	15550	9.9	6.60136
J	19	Sample X235	15976	15620	11.3	7.53982
J	20	Sample X236	16584	16224	11	7.34214
J	21	Sample X237	18590	18176	11.3	7.53522
J	22	Sample X238	19985	19632	8.9	5.95791
J	23	Sample X239	18504	18164	9.3	6.20076
J	24	Sample X240	28403	27850	9.8	6.57527
K	1	Sample X241	31829	29304	41.3	27.92
K	2	Sample X242	23666	22684	21.2	14.2249
K	3	Sample X243	23056	21877	26.2	17.6471
K	4	Sample X244	22887	22219	14.8	9.92202
K	5	Sample X245	21508	20766	17.6	11.7703
K	6	Sample X246	21182	20671	12.2	8.17286
K	7	Sample X247	23329	22673	14.3	9.55224
K	8	Sample X248	24173	23644	11.1	7.40264
K	9	Sample X249	23960	23420	11.4	7.62712
K	10	Sample X250	24023	23603	8.8	5.89647
K	11	Sample X251	24940	24495	9	6.01921
K	12	Sample X252	24381	23857	10.9	7.26819
K	13	Sample X253	38126	37411	9.5	6.33035
K	14	Sample X254	22510	22096	9.3	6.20671
K	15	Sample X255	23795	23316	10.2	6.80137
K	16	Sample X256	19372	19097	7.1	4.77713
K	17	Sample X257	20041	19660	9.6	6.41836
K	18	Sample X258	21339	20887	10.7	7.16176
K	19	Sample X259	23262	22866	8.6	5.73963
K	20	Sample X260	21870	21485	8.9	5.93769
K	21	Sample X261	23369	22968	8.7	5.78602
K	22	Sample X262	23365	22920	9.6	6.43017
K	23	Sample X263	22988	22534	10	6.67098
K	24	Sample X264	38038	37360	9	6.01288
L	1	Sample X265	26009	24042	39.3	26.5477
L	2	Sample X266	24503	23439	22.2	14.9059
L	3	Sample X267	27216	25831	26.1	17.5588
L	4	Sample X268	25413	24612	16	10.7319
L	5	Sample X269	26923	26052	16.4	11.0215
L	6	Sample X270	26586	25987	11.4	7.62475
L	7	Sample X271	27783	26970	14.8	9.94824
L	8	Sample X272	27682	27142	9.8	6.5881
L	9	Sample X273	25869	25255	12	8.03886
L	10	Sample X274	26976	26393	10.9	7.30925
L	11	Sample X275	29205	28546	11.4	7.63642
L	12	Sample X276	34506	33906	8.8	5.86407
L	13	Sample X277	22054	21556	11.4	7.64202
L	14	Sample X278	20901	20548	8.5	5.69382
L	15	Sample X279	18543	18195	9.5	6.33499
L	16	Sample X280	20644	20259	9.4	6.29476
L	17	Sample X281	19689	19354	8.6	5.7366
L	18	Sample X282	22922	22491	9.5	6.3472
L	19	Sample X283	22627	22206	9.4	6.27993
L	20	Sample X284	22974	22575	8.8	5.85697
L	21	Sample X285	24100	23623	10	6.68573
L	22	Sample X286	25361	24929	8.6	5.74323
L	23	Sample X287	24480	24056	8.7	5.84086
L	24	Sample X288	38285	37542	9.8	6.55382
M	1	Sample X289	18094	17136	27.2	18.2943
M	2	Sample X290	15289	14735	18.5	12.3774
M	3	Sample X291	12871	12413	18.1	12.1495
M	4	Sample X292	12682	12329	14.1	9.45367
M	5	Sample X293	12416	12017	16.3	10.9465
M	6	Sample X294	14568	14217	12.2	8.16241
M	7	Sample X295	15190	14786	13.5	9.02551
M	8	Sample X296	15835	15488	11.1	7.41279
M	9	Sample X297	16396	16018	11.7	7.80476
M	10	Sample X298	16968	16661	9.1	6.10459
M	11	Sample X299	17442	17016	12.4	8.27602
M	12	Sample X300	17947	17536	11.6	7.75194
M	13	Sample X301	25779	25335	8.7	5.80779
M	14	Sample X302	10466	10229	11.5	7.66395
M	15	Sample X303	9933	9712	11.2	7.52802
M	16	Sample X304	8875	8689	10.6	7.0849
M	17	Sample X305	10703	10477	10.7	7.13902
M	18	Sample X306	12956	12719	9.2	6.17284
M	19	Sample X307	14428	14122	10.7	7.17098
M	20	Sample X308	13770	13495	10.1	6.74681
M	21	Sample X309	14765	14462	10.4	6.93538
M	22	Sample X310	16054	15694	11.3	7.58821
M	23	Sample X311	16295	15985	9.6	6.42287
M	24	Sample X312	27745	27241	9.2	6.12937
N	1	Sample X313	15853	15054	25.9	17.3843
N	2	Sample X314	15665	15117	17.8	11.9393
N	3	Sample X315	17572	16964	17.6	11.8058
N	4	Sample X316	16240	15830	12.8	8.5595
N	5	Sample X317	16838	16356	14.5	9.72755
N	6	Sample X318	16929	16499	12.9	8.61257
N	7	Sample X319	17139	16677	13.7	9.14978
N	8	Sample X320	17086	16673	12.2	8.18924
N	9	Sample X321	16133	15782	11	7.35895
N	10	Sample X322	18068	17658	11.5	7.6802
N	11	Sample X323	22048	21537	11.7	7.84681
N	12	Sample X324	28793	28213	10.2	6.80599
N	13	Sample X325	9994	9802	9.7	6.48692
N	14	Sample X326	8564	8380	10.9	7.26583
N	15	Sample X327	8365	8203	9.8	6.53991
N	16	Sample X328	10223	9990	11.5	7.71447
N	17	Sample X329	10930	10710	10.2	6.80062
N	18	Sample X330	12433	12217	8.8	5.8589
N	19	Sample X331	12224	11959	11	7.33219
N	20	Sample X332	13673	13377	10.9	7.32184
N	21	Sample X333	14900	14603	10.1	6.73378
N	22	Sample X334	16725	16331	11.9	7.97781
N	23	Sample X335	15895	15531	11.6	7.75177
N	24	Sample X336	24511	24011	10.3	6.89341
O	1	Sample X337	17413	15313	64.2	43.7145
O	2	Sample X338	14045	13173	32	21.589
O	3	Sample X339	14640	13401	44.2	29.8972
O	4	Sample X340	13060	12476	22.9	15.3636
O	5	Sample X341	12487	11750	30.4	20.4796
O	6	Sample X342	14744	14255	16.9	11.3053
O	7	Sample X343	15243	14564	22.8	15.3028
O	8	Sample X344	16337	15778	17.4	11.6719
O	9	Sample X345	16540	15928	18.8	12.6457
O	10	Sample X346	17189	16706	14.2	9.54527
O	11	Sample X347	17167	16716	13.3	8.91322
O	12	Sample X348	18272	17721	15.3	10.258
O	13	Sample X349	26310	25516	15.3	10.2661
O	14	Sample X350	5871	5711	13.8	9.2523
O	15	Sample X351	10112	9796	15.9	10.6383
O	16	Sample X352	8729	8472	14.9	10.0105
O	17	Sample X353	10426	10134	14.2	9.51326
O	18	Sample X354	12974	12621	13.8	9.23697
O	19	Sample X355	14444	14070	13.1	8.78264
O	20	Sample X356	13914	13527	14.1	9.4464
O	21	Sample X357	14679	14275	14	9.34558
O	22	Sample X358	16286	15802	15.1	10.1065
O	23	Sample X359	25118	24469	13.1	8.76364
O	24	Sample X360	21894	21354	12.5	8.35887
P	1	Sample X361	14962	13170	63.7	43.3877
P	2	Sample X362	14214	13298	33.3	22.4455
P	3	Sample X363	16293	14938	43.4	29.3487
P	4	Sample X364	15515	14865	21.4	14.3662
P	5	Sample X365	15994	15008	31.8	21.4301
P	6	Sample X366	15678	15086	19.2	12.9117
P	7	Sample X367	16219	15531	21.7	14.5513
P	8	Sample X368	16157	15692	14.6	9.78103
P	9	Sample X369	15553	14975	18.9	12.7025
P	10	Sample X370	17515	17034	13.9	9.32478
P	11	Sample X371	23846	23135	15.1	10.1403
P	12	Sample X372	35176	34134	15	10.0731
P	13	Sample X373	9822	9538	14.7	9.82767
P	14	Sample X374	8789	8554	13.6	9.07441
P	15	Sample X375	8227	7987	14.8	9.91695
P	16	Sample X376	10086	9828	13	8.6746
P	17	Sample X377	10859	10564	13.8	9.2225
P	18	Sample X378	12406	12072	13.6	9.13817
P	19	Sample X379	12840	12489	13.9	9.28129
P	20	Sample X380	13687	13353	12.4	8.26876
P	21	Sample X381	14514	14177	11.7	7.86134
P	22	Sample X382	16116	15684	13.6	9.0978
P	23	Sample X383	15438	15044	12.9	8.6544
P	24	Sample X384	24836	24243	12.1	8.08761
[truncated: 8 more columns]

## Sheet: Sheet1
75.9881													77.394											73.9435	75.5232
72.3035													74.3729											71.6093	70.6937
70.7123													69.5191											70.3306	66.8691
68.4316													60.2257											67.5229	59.2264
64.5235													51.7884											64.6828	51.7788
61.0166													39.8733											60.6239	38.9398
52.9366													28.1349											52.9964	27.1889
43.3775													21.1447											43.1828	20.4777
34.5014													15.7286											33.2555	14.9394
24.3201													12.1994											23.4195	11.9634
16.8618													10.7882											17.3852	11.3702
8.52788													8.70765											9.45418	9.97637
76.8381													79.3115											10.6042	8.42779
74.4943													73.5464											9.84406	7.95676
71.724													67.0356											7.55348	7.16383
68.7049													61.0429											6.4715	6.5008
65.2712													51.3229											6.94183	6.76979
60.1													39.6966											7.14667	6.6038
53.4256													28.5208											6.42395	8.22935
45.9763													21.8122											6.68977	7.60568
35.047													15.1435											7.94393	6.68206
23.9336													12.8055											8.18744	7.67623
16.4234													11.5145											6.62272	7.80446
9.89965													9.1126											7.93626	7.06621
10.8652													9.59162											83.9401	61.6301
9.88234													7.46584											72.5381	45.342
8.09099													6.8952											59.7151	33.5592
7.45099													7.99649											43.5849	24.7226
7.57425													7.99719											33.6117	20.1335
8.26409													6.4918											24.9335	17.655
7.8979													7.42126											20.7362	13.6075
6.64028													7.38243											17.048	14.3719
8.27197													8.17103											15.8994	14.4642
7.62869													7.07551											14.7901	14.0426
7.50393													7.24531											14.0904	11.92
7.18791													7.25325											12.9433	12.3357
11.3695													9.09637											75.7617	78.5557
8.1988													7.63168											64.6112	61.4397
7.38201													7.72011											50.3418	42.9407
8.6608													7.10069											39.0779	31.7374
7.68848													7.0575											28.4528	21.8809
8.30664													6.71448											21.9473	18.5664
6.53033													8.43848											17.9646	15.6962
7.49642													7.27476											17.2387	14.3404
7.27657													7.17143											14.6928	13.7327
7.19648													8.4271											14.714	13.2178
7.0802													8.01637											13.9962	12.3901
7.35614													7.14043											14.012	11.8451
67.6064													61.3503											43.8741	23.9548
73.7714													45.6538											28.5785	15.7018
59.5863													29.8237											21.7194	9.68264
45.7397													23.7571											14.4929	7.98722
35.1835													17.3031											10.8416	7.27839
25.5141													13.5248											9.48642	7.2323
17.408													15.6788											8.01547	8.12328
16.681													13.5976											7.90802	7.37608
14.3207													13.5798											6.88949	6.49712
13.1808													13.4223											6.57342	7.49005
14.6784													13.106											7.26172	6.25999
12.5746													12.5311											6.40196	6.68539
84.2195													63.4619											28.8476	14.4115
74.7737													46.1326											18.1336	10.7578
60.5239													35.2555											12.3938	8.47313
46.6716													24.1658											9.88086	5.70155
34.3739													18.4275											8.70463	7.04467
25.0961													15.1879											6.85403	5.14039
20.9777													14.6409											6.8075	5.583
16.8518													13.7519											6.69676	7.06357
15.0195													14.1213											6.7009	6.62869
13.5845													14.559											6.66984	5.61831
13.2774													12.0869											6.93068	6.18823
13.3265													13.0146											6.37745	6.40022
75.5886													78.1492											20.0573	12.3067
65.1517													62.0173											13.0234	7.85306
52.1638													44.8884											9.95669	7.73591
38.6531													32.4501											7.25101	6.8742
28.7466													23.9908											6.8502	6.2165
22.159													17.4078											6.8331	6.81576
16.7342													14.985											8.02798	7.26912
15.3254													14.3637											6.90941	7.6801
13.4926													13.3263											7.03667	0
13.443													12.4207											6.18528	6.57447
12.6277													13.5198											6.58646	6.89989
11.8719													11.3893											6.60141	6.25152
76.3027													78.3613											43.7529	19.8731
64.4008													60.7724											28.3509	14.3818
51.9757													43.184											19.6816	10.7493
38.8612													32.9007											14.1858	9.66294
29.1493													22.9823											10.5112	10.203
20.4109													17.4951											9.19681	9.41969
17.6225													16.3317											10.0756	8.6761
16.1105													14.2534											9.57165	9.6123
13.9754													12.8984											10.5067	10.2078
13.6629													12.4366											9.60426	9.08157
12.4665													12.5575											9.2332	8.63117
11.2243													12.0559											7.9373	8.34752
42.9069													23.2753
29.5888													15.1512
19.5511													10.4412
13.6116													9.46372
10.3337													7.47515
7.80732													7.64384
8.46251													7.5215
7.64184													6.69571
6.65306													6.5874
7.63657													7.08747
6.83471													7.5536
6.53073													6.26599
42.254													22.8394
27.8544													15.0541
19.0961													11.5474
14.8965													8.93935
10.989													8.18622
9.36107													7.10694
7.56522													7.19542
7.08748													7.95463
7.54448													6.60136
7.53982													7.34214
7.53522													5.95791
6.20076													6.57527
27.92													14.2249
17.6471													9.92202
11.7703													8.17286
9.55224													7.40264
7.62712													5.89647
6.01921													7.26819
6.33035													6.20671
6.80137													4.77713
6.41836													7.16176
5.73963													5.93769
5.78602													6.43017
6.67098													6.01288
26.5477													14.9059
17.5588													10.7319
11.0215													7.62475
9.94824													6.5881
8.03886													7.30925
7.63642													5.86407
7.64202													5.69382
6.33499													6.29476
5.7366													6.3472
6.27993													5.85697
6.68573													5.74323
5.84086													6.55382
18.2943													12.3774
12.1495													9.45367
10.9465													8.16241
9.02551													7.41279
7.80476													6.10459
8.27602													7.75194
5.80779													7.66395
7.52802													7.0849
7.13902													6.17284
7.17098													6.74681
6.93538													7.58821
6.42287													6.12937
17.3843													11.9393
11.8058													8.5595
9.72755													8.61257
9.14978													8.18924
7.35895													7.6802
7.84681													6.80599
6.48692													7.26583
6.53991													7.71447
6.80062													5.8589
7.33219													7.32184
6.73378													7.97781
7.75177													6.89341
43.7145													21.589
29.8972													15.3636
20.4796													11.3053
15.3028													11.6719
12.6457													9.54527
8.91322													10.258
10.2661													9.2523
10.6383													10.0105
9.51326													9.23697
8.78264													9.4464
9.34558													10.1065
8.76364													8.35887
43.3877													22.4455
29.3487													14.3662
21.4301													12.9117
14.5513													9.78103
12.7025													9.32478
10.1403													10.0731
9.82767													9.07441
9.91695													8.6746
9.2225													9.13817
9.28129													8.26876
7.86134													9.0978
8.6544													8.08761
