# Supplementary material for: PDZ-directed substrate recruitment is the primary determinant of specific 4E-BP1 dephosphorylation by PP1-Neurabin
Source: eLife journal article supplement (doi:10.7554/elife.103403), 2024-11-20
Supplement: fig4-data3 [file summary-all-FPassays.xlsx]

## Sheet: Sheet1
Neurabin												Spinophilin
	4ebp	sgs	s6k	kalirin	nr1-1	nr2A/B	glur1	glur2					4ebp	sgs	s6k	kalirin	nr1-1	nr2A/B	glur1	glur2
average Kd	4.85533	95872	146.933	178.967	950.367	3900.33	66786	1431.33					23.4333	206.462	481.633	277.233	24928	49724	65216.3	18673
std.dev error	0.152622	95872	2.63987	11.0774	149.323	1568.34	3802	281.501					4.12764	291.214	89.5995	57.9345	16246.6	28774.3	47657.6	21217.9
Export of binding curve fit from Prizm
Assay on 05.12.2023 morning
	4ebp	sgs	s6k	kalirin	nr1-1	nr2A/B	glur1	glur2					4ebp	sgs	s6k	kalirin	nr1-1	nr2A/B	glur1	glur2
FP ligand binding (Kd1)												FP ligand binding (Kd1)
Best-fit values												Best-fit values
Ab	72.9	1295295	97.77	91.74	96.53	199.4	52707	124.9				Ab	78.68	7.552	110.6	114	999.9	999.7	999.7	1000
Af	9.615	7.331	13.46	13.04	7.011	6.353	6.882	8.974				Af	9.535	7.155	13.02	12.5	6.815	6.025	6.865	8.997
Kd	5.071	Unstable	150.4	193.9	1130	6042	Unstable	1768				Kd	25.08	8.703e-11	589.7	324.1	35400	69464	118676	48670
L	= 0.1000	= 0.1000	= 0.1000	= 0.1000	= 0.1000	= 0.1000	= 0.1000	= 0.1000				L	= 0.1000	= 0.1000	= 0.1000	= 0.1000	= 0.1000	= 0.1000	= 0.1000	= 0.1000
Std. Error												Std. Error
Ab	0.4609	2586736	0.9849	0.8909	5.846	90.9	30185897	13				Ab	0.5158	0.146	5.351	1.606	4413	18525	57540	10853
Af	0.7346	0.1298	0.2371	0.1951	0.1527	0.125	0.148	0.1646				Af	0.3676	0.4184	0.2593	0.1665	0.1221	0.1341	0.1458	0.1595
Kd	0.2549	Unstable	5.032	6.134	112.6	3163	Unstable	268.7				Kd	0.8829	0.5249	56.31	11.01	159749	1305289	6909427	539044
95% CI (profile likelihood)												95% CI (profile likelihood)
Ab	71.95 to 73.85	???	95.79 to 99.85	89.96 to 93.61	86.00 to 110.9	106.9 to ???	???	103.8 to 160.4				Ab	77.63 to 79.75	7.318 to ???	100.9 to 123.1	110.8 to 117.4	141.4 to ???	???	???	88.92 to ???
Af	8.083 to 11.12	7.206 to 7.710	12.98 to 13.95	12.65 to 13.44	6.698 to 7.322	6.098 to 6.607	6.585 to 7.155	8.638 to 9.308				Af	8.780 to 10.28	6.302 to 7.754	12.49 to 13.55	12.16 to 12.84	6.588 to 7.040	5.765 to 6.271	??? to 7.133	8.704 to 9.291
Kd	4.563 to 5.643	(Very wide)	140.4 to 161.2	181.7 to 207.0	928.9 to 1410	2833 to +infinity	(Very wide)	1335 to 2508				Kd	23.32 to 26.98	???	489.4 to 723.3	302.6 to 347.7	4337 to ???	???	???	3446 to ???
Goodness of Fit												Goodness of Fit
Degrees of Freedom	33	33	32	33	33	33	33	33				Degrees of Freedom	33	33	33	33	33	33	32	33
R squared	0.9954	0.7474	0.9985	0.9987	0.9963	0.9921	0.9618	0.9952				R squared	0.998	0.02599	0.9948	0.999	0.987	0.9431	0.8374	0.9593
Sum of Squares	83.65	13.5	27.36	20.25	15.63	11.17	16.11	18.64				Sum of Squares	44.1	17.33	43.47	16.7	10.81	13.05	14.32	18.46
Sy.x	1.592	0.6395	0.9247	0.7834	0.6882	0.5818	0.6987	0.7517				Sy.x	1.156	0.7247	1.148	0.7114	0.5724	0.6289	0.6691	0.748
Constraints												Constraints
Af	0 < Af < 15	0 < Af < 15	0 < Af < 15	0 < Af < 15	0 < Af < 15	0 < Af < 15	0 < Af < 15	0 < Af < 15				Ab	0 < Ab < 1000	0 < Ab < 1000	0 < Ab < 1000	0 < Ab < 1000	0 < Ab < 1000	0 < Ab < 1000	0 < Ab < 1000	0 < Ab < 1000
Kd	Kd > 0	Kd > 0	Kd > 0	Kd > 0	Kd > 0	Kd > 0	Kd > 0	Kd > 0				Af	0 < Af < 100	0 < Af < 100	0 < Af < 100	0 < Af < 100	0 < Af < 100	0 < Af < 100	0 < Af < 100	0 < Af < 100
L	L = 0.1	L = 0.1	L = 0.1	L = 0.1	L = 0.1	L = 0.1	L = 0.1	L = 0.1				Kd	Kd > 0	Kd > 0	Kd > 0	Kd > 0	Kd > 0	Kd > 0	Kd > 0	Kd > 0
												L	L = 0.1	L = 0.1	L = 0.1	L = 0.1	L = 0.1	L = 0.1	L = 0.1	L = 0.1
Number of points
# of X values	36	36	36	36	36	36	36	36				Number of points
# Y values analyzed	36	36	35	36	36	36	36	36				# of X values	36	36	36	36	36	36	36	36
												# Y values analyzed	36	36	36	36	36	36	35	36
Assay on 05.12.2023 afternoon
	4E-BP	4E-BP(SGS)	S6K	Kalirin-7	NR1-1	NR2A/B	GluR1	GluR2					4ebp	sgs	s6k	kalirin-7	nr1-1	nr2a/b	glur1	glur2
FP ligand binding (Kd1)												FP ligand binding (Kd1)
Best-fit values												Best-fit values
Ab	79.35	14.98	104	95.04	83.28	121.9	999.9	115.5				Ab	86.3	14.89	109.6	118.1	999.8	1000	34.4	90.3
Af	17.55	15.18	20.57	19.72	14.2	13.95	14.71	16.47				Af	16.39	14.4	20.5	19.72	14.38	13.79	14.51	16.28
Kd	4.755	5.046e-11	146.4	167.4	764.4	3329	70588	1447				Kd	27.46	1.085	484.9	312	37403	70671	2942	3018
L	= 0.1000	= 0.1000	= 0.1000	= 0.1000	= 0.1000	= 0.1000	= 0.1000	= 0.1000				L	= 0.1000	= 0.1000	= 0.1000	= 0.1000	= 0.1000	= 0.1000	= 0.1000	= 0.1000
Std. Error												Std. Error
Ab	0.4726	0.1926	0.8268	0.7092	3.035	52.96	11569	7.453				Ab	0.5537	0.1436	2.089	1.497	5366	21473	46.5	50.48
Af	0.7495	0.5505	0.2059	0.1758	0.1413	0.2207	0.131	0.1324				Af	0.3768	0.3244	0.1319	0.1621	0.1331	0.1502	0.1593	0.181
Kd	0.2482	1.763	4.185	4.629	57.92	1956	837052	155.1				Kd	1.004	2.528	21.15	10.34	206677	1550693	8107	2420
95% CI (profile likelihood)												95% CI (profile likelihood)
Ab	78.39 to 80.32	14.55 to 15.24	102.3 to 105.7	93.62 to 96.51	77.70 to 90.14	68.58 to ???	74.00 to ???	102.4 to 134.2				Ab	85.18 to 87.45	14.63 to ???	105.6 to 114.1	115.1 to 121.2	???	55.45 to ???	17.70 to ???	48.34 to ???
Af	15.99 to 19.08	13.85 to 15.24	20.15 to 20.98	19.36 to 20.08	13.92 to 14.49	13.49 to 14.39	14.47 to 14.95	16.21 to 16.74				Af	15.62 to 17.15	13.74 to 14.98	20.24 to 20.77	19.40 to 20.05	??? to 14.62	??? to 14.06	??? to 14.82	15.91 to 16.65
Kd	4.261 to 5.313	???	138.1 to 155.2	158.2 to 177.2	659.0 to 896.7	1377 to ???	3628 to ???	1176 to 1838				Kd	25.45 to 29.64	???	444.5 to 530.8	291.7 to 334.1	???	2496 to ???	148.6 to ???	1027 to ???
Goodness of Fit												Goodness of Fit
Degrees of Freedom	44	45	43	45	45	45	43	42				Degrees of Freedom	45	44	45	45	45	45	45	37
R squared	0.9932	0.0002564	0.9985	0.9986	0.9956	0.9634	0.954	0.9961				R squared	0.9971	0.05246	0.9982	0.9986	0.9764	0.9022	0.588	0.9548
Sum of Squares	150.5	54.56	36.82	29.05	23.53	62.49	20.76	19.48				Sum of Squares	86.96	19.99	20.04	28.62	23.37	29.77	32.66	27.88
Sy.x	1.85	1.101	0.9254	0.8034	0.7231	1.178	0.6949	0.6811				Sy.x	1.39	0.6741	0.6673	0.7975	0.7206	0.8134	0.8519	0.868
Constraints												Constraints
Ab	0 < Ab < 1000	0 < Ab < 1000	0 < Ab < 1000	0 < Ab < 1000	0 < Ab < 1000	0 < Ab < 1000	0 < Ab < 1000	0 < Ab < 1000				Ab	0 < Ab < 1000	0 < Ab < 1000	0 < Ab < 1000	0 < Ab < 1000	0 < Ab < 1000	0 < Ab < 1000	0 < Ab < 1000	0 < Ab < 1000
Af	0 < Af < 100	0 < Af < 100	0 < Af < 100	0 < Af < 100	0 < Af < 100	0 < Af < 100	0 < Af < 100	0 < Af < 100				Af	0 < Af < 100	0 < Af < 100	0 < Af < 100	0 < Af < 100	0 < Af < 100	0 < Af < 100	0 < Af < 100	0 < Af < 100
Kd	Kd > 0	Kd > 0	Kd > 0	Kd > 0	Kd > 0	Kd > 0	Kd > 0	Kd > 0				Kd	Kd > 0	Kd > 0	Kd > 0	Kd > 0	Kd > 0	Kd > 0	Kd > 0	Kd > 0
L	L = 0.1	L = 0.1	L = 0.1	L = 0.1	L = 0.1	L = 0.1	L = 0.1	L = 0.1				L	L = 0.1	L = 0.1	L = 0.1	L = 0.1	L = 0.1	L = 0.1	L = 0.1	L = 0.1
Number of points												Number of points
# of X values	48	48	48	48	48	48	48	48				# of X values	48	48	48	48	48	48	48	48
# Y values analyzed	47	48	46	48	48	48	46	45				# Y values analyzed	48	47	48	48	48	48	48	40
Assay on 15.04.2024
	4ebp	sgs	s6k	kali-7	nr1-1	nr2	glu1	glu2					4ebp	sgs	s6k	kali-7	nr1-1	nr2	glu1	glu2
FP ligand binding (Kd1)												FP ligand binding (Kd1)
Best-fit values												Best-fit values
Ab	76.08	999.5	95.76	91.78	91.54	96.36	999.8	90.6				Ab	83.37	15.47	107.7	113.2	109.2	215	999	157.1
Af	11.3	10.02	15.88	15.19	9.735	9.247	9.849	11.79				Af	11.48	9.608	15.86	15.07	9.677	9.256	9.828	11.98
Kd	4.74	191744	144	175.6	956.7	2330	62984	1079				Kd	17.76	618.3	370.3	195.6	1981	9037	74031	4331
L	= 0.1000	= 0.1000	= 0.1000	= 0.1000	= 0.1000	= 0.1000	= 0.1000	= 0.1000				L	= 0.1000	= 0.1000	= 0.1000	= 0.1000	= 0.1000	= 0.1000	= 0.1000	= 0.1000
Std. Error												Std. Error
Ab	0.3881	100173	0.8382	0.9624	5.342	21.67	13098	7.544				Ab	0.4223	4.047	2.33	1.815	23.13	350.6	27059	100.9
Af	0.3861	0.1288	0.1935	0.1917	0.1586	0.1488	0.1551	0.1763				Af	0.2514	0.162	0.181	0.2727	0.1406	0.122	0.1467	0.1448
Kd	0.1762	19483664	4.632	6.364	101.4	744.7	842688	158.3				Kd	0.4981	741.7	19.47	9.355	583.1	16351	2040596	3393
95% CI (profile likelihood)												95% CI (profile likelihood)
Ab	75.29 to 76.87	???	94.08 to 97.51	89.86 to 93.79	82.17 to 104.4	68.33 to 197.8	65.76 to ???	78.14 to 110.0				Ab	82.52 to 84.22	12.01 to ???	103.2 to 112.7	109.6 to 117.0	78.63 to 207.2	57.96 to ???	???	75.04 to ???
Af	10.51 to 12.08	9.780 to 10.26	15.49 to 16.28	14.80 to 15.58	9.412 to 10.06	8.944 to 9.549	9.559 to 10.14	11.43 to 12.14				Af	10.97 to 11.98	9.274 to 9.932	15.49 to 16.22	14.52 to 15.62	9.394 to 9.960	9.006 to 9.501	9.548 to 10.10	11.69 to 12.27
Kd	4.392 to 5.117	???	134.9 to 153.9	163.1 to 189.2	780.9 to 1203	1375 to 5844	2924 to ???	821.6 to 1492				Kd	16.78 to 18.79	83.44 to ???	333.1 to 413.2	177.7 to 215.7	1215 to 4467	1734 to ???	???	1585 to ???
Goodness of Fit												Goodness of Fit
Degrees of Freedom	45	45	45	45	33	33	45	44				Degrees of Freedom	45	45	45	45	45	33	45	45
R squared	0.9973	0.6994	0.9982	0.9978	0.9952	0.9871	0.9362	0.9882				R squared	0.9984	0.4912	0.997	0.9965	0.9866	0.9749	0.8827	0.975
Sum of Squares	87.97	24.73	44.49	44.83	19.52	17.73	35.85	43.12				Sum of Squares	54.81	36.64	44.18	94.35	28.84	12.15	32.06	30.94
Sy.x	1.398	0.7413	0.9943	0.9981	0.7692	0.733	0.8926	0.9899				Sy.x	1.104	0.9023	0.9909	1.448	0.8005	0.6068	0.8441	0.8292
Constraints												Constraints
Ab	0 < Ab < 1000	0 < Ab < 1000	0 < Ab < 1000	0 < Ab < 1000	0 < Ab < 1000	0 < Ab < 1000	0 < Ab < 1000	0 < Ab < 1000				Ab	0 < Ab < 1000	0 < Ab < 1000	0 < Ab < 1000	0 < Ab < 1000	0 < Ab < 1000	0 < Ab < 1000	0 < Ab < 1000	0 < Ab < 1000
Af	0 < Af < 100	0 < Af < 100	0 < Af < 100	0 < Af < 100	0 < Af < 100	0 < Af < 100	0 < Af < 100	0 < Af < 100				Af	0 < Af < 100	0 < Af < 100	0 < Af < 100	0 < Af < 100	0 < Af < 100	0 < Af < 100	0 < Af < 100	0 < Af < 100
Kd	Kd > 0	Kd > 0	Kd > 0	Kd > 0	Kd > 0	Kd > 0	Kd > 0	Kd > 0				Kd	Kd > 0	Kd > 0	Kd > 0	Kd > 0	Kd > 0	Kd > 0	Kd > 0	Kd > 0
L	L = 0.1	L = 0.1	L = 0.1	L = 0.1	L = 0.1	L = 0.1	L = 0.1	L = 0.1				L	L = 0.1	L = 0.1	L = 0.1	L = 0.1	L = 0.1	L = 0.1	L = 0.1	L = 0.1
Number of points												Number of points
# of X values	48	48	48	48	48	48	48	48				# of X values	48	48	48	48	48	48	48	48
# Y values analyzed	48	48	48	48	36	36	48	47				# Y values analyzed	48	48	48	48	48	36	48	48
