# Supplementary material for: PDZ-directed substrate recruitment is the primary determinant of specific 4E-BP1 dephosphorylation by PP1-Neurabin
Source: eLife journal article supplement (doi:10.7554/elife.103403), 2024-11-20
Supplement: fig5-data1 [file 030424 data analysis.xlsx]

## Sheet: Sheet1
	PP1-Neb 0.25 nM																PP1-Ph3 2.5 nM
	V1	V2	V3	V4	V5	V6	V7	V8	4ebp-pdz	4ebp-sgs	irsp53-pdz	irsp53-sgs	L5A-PDZ	L5A-SGS			V1	V2	V3	V4	V5	V6	V7	V8	4ebp-pdz	4ebp-sgs	irsp53-pdz	irsp53-sgs	L5A-PDZ	L5A-SGS
400	na	0.173826	0.160699	0.125635	0.128136	na	0.72245	na	0.252627	0.106161	na	0.366626	0.441482	0.291345			na	0.220231	0.287345	0.122088	0.579262	na	na	na	0.333304	0.0342847	0.377382	0.586451	0.878997	na
200	na	0.173149	0.161663	0.134387	0.121154	na	0.592879	na	0.248783	0.0810078	2.54823	0.339037	0.890039	0.279906			na	0.141504	0.247828	0.0972991	0.470169	na	na	na	0.30805	0.0241619	0.531594	0.76709	2.10664	na
100	na	0.153439	0.135613	0.119137	0.110361	na	0.466458	na	0.200666	0.0382924	0.767894	0.123519	1.19932	0.142086			na	0.110877	0.142054	0.0479868	0.407585	na	1.73666	na	0.173839	0.0231763	1.03672	0.659417	1.52347	1.08328
50	na	0.161954	0.126598	0.117747	0.110329	na	0.419706	na	0.165557	0.0417299	2.64189	0.228676	1.0814	0.14559			4.07994	0.053272	0.0822583	0.0268882	0.316954	1.05104	0.665638	0.976253	0.076601	0.00644107	0.791653	0.623558	0.687242	0.508818
25	1.9435	0.15586	0.109012	0.104722	0.110419	1.7317	0.439882	2.81978	0.139522	0.01735	1.50043	0.0865481	0.794812	0.0683379			0.824375	0.0246102	0.0533435	0.0189071	0.184708	0.614191	0.522269	1.06193	0.051996	0.0060333	0.681532	0.619332	0.326139	0.318393
12.5	1.42908	0.18253	0.108978	0.108246	0.112998	1.0307	0.410511	1.03576	0.114448	0.0143735	0.846638	0.0415662	0.484145	0.0402537			0.323795	0.00514433	0.0264892	0.0135301	0.101039	0.240236	0.289664	0.336615	0.0144443	0.00450144	0.422686	0.367857	0.168694	0.148739
6.25	0.437384	0.116531	0.11174	0.0816059	0.0696697	0.627832	0.295357	0.576339	0.0869295	0.00951116	0.501687	0.0135288	0.306897	0.0247558			0.142965	-0.00442226	0.0157465	0.00517075	0.0560981	0.100834	0.119369	0.181902	0.00502059	-0.00179098	0.351033	0.277034	0.0764111	0.059063
3.125	0.26948	0.0833248	0.0739418	0.0573629	0.0703508	0.253135	0.176931	0.293906	0.0489174	0.00849948	0.203205	0.00677543	0.169124	0.0108804			0.0849488	0.00629779	0.00858528	0.00541012	0.0375116	0.0379946	0.0547241	0.0925206	-0.00288715	-0.00519816	0.145923	0.175629	0.0354365	0.0292834
1.5625	0.113925	0.0481815	0.0395719	0.045047	0.0398056	0.11378	0.0931818	0.178059	0.0260431	0.00967204	0.109057	-0.00454559	0.0912232	0.00535065			0.0340214	-0.00439201	0.00255132	0.00301816	0.00386274	0.0168004	0.0197081	0.0390792	-0.00548143	-0.00397872	0.091041	0.110279	0.0159735	0.0159407
0.78125	0.0699526	0.022215	0.0254797	0.0283275	0.025205	0.0710237	0.0482496	0.0753333	0.00749305	0.00338852	0.051568	-0.00587007	0.0411851	0.00658228			0.0202449	-0.00182349	0.00285676	0.000952638	0.00836477	0.00676359	0.0110745	0.0230552	-0.0055836	0.000404182	0.0401454	0.0576587	0.00429007	0.000472505
0.390625	0.0358468	0.0195062	0.0107775	0.0199816	0.0170428	0.0710723	0.0277471	0.0362849	0.00159616	0.00426605	0.0212839	0.00282687	0.0239059	0.000785425			0.00971686	-0.00174574	0.00180141	-0.00111654	0.0147517	0.00700373	0.0101549	0.00973318	-0.00376345	-0.00369339	0.00418534	0.0361244	-0.00178136	0.00387133
0	0	0	0	0	0	0	0	0	0	0	0	0	0	0			0	0	0	0	0	0	0	0	0	0	0	0	0	0
	PP1-Neb 0.25 nM																PP1-Ph3 2.5 nM
	V1	V2	V3	V4	V5	V6	V7	V8	4ebp-pdz	4ebp-sgs	irsp53-pdz	irsp53-sgs	L5A-PDZ	L5A-SGS			V1	V2	V3	V4	V5	V6	V7	V8	4ebp-pdz	4ebp-sgs	irsp53-pdz	irsp53-sgs	L5A-PDZ	L5A-SGS
400	na	0.151947	0.144588	0.0838937	0.102435	na	0.604077	na	0.19224	0.0749312	0.429513	0.167085	0.423223	0.109856			na	0.303805	0.237452	0.0988147	0.471013	na	na	na	0.414723	0.0386627	0.394276	0.393296	0.576578	0.786372
200	na	0.155991	0.159108	0.094736	0.105142	na	0.514763	na	0.181803	0.05261	0.3924	0.0793724	0.389184	0.0658555			na	0.246146	0.196014	0.0748114	0.562153	na	na	na	0.295054	0.0218999	0.527972	0.400474	0.569651	1.07962
100	3.06381	0.167101	0.151223	0.085502	0.0969533	na	0.487249	1.48379	0.128999	0.0476347	0.433707	0.126539	0.420571	0.2363			na	0.136732	0.128991	0.0483897	0.411536	na	1.55827	na	0.14598	0.0155298	0.764828	0.463061	0.576458	0.513649
50	1.56626	0.162617	0.141246	0.0915733	0.0897731	na	0.336885	1.0639	0.127882	0.0206159	0.464751	0.0490116	0.51506	0.116587			3.1191	0.0683823	0.0729144	0.0255484	0.312539	1.18055	0.557894	1.08395	0.0696538	0.00811237	0.5324	0.454316	0.400957	0.625318
25	1.30773	0.147358	0.120306	0.0820039	0.0866498	2.58722	0.320197	0.835783	0.0990033	0.01658	0.432631	0.0449132	0.400953	0.0325306			1.62534	0.0397821	0.0453669	0.00938934	0.183325	0.483155	0.462191	0.557431	0.0323182	-0.000215675	0.506126	0.362424	0.257368	0.248312
12.5	0.911174	0.120605	0.0976887	0.0564647	0.0782718	0.83084	0.374408	0.589986	0.104545	0.00264669	0.425139	-0.00285879	0.41435	0.0282546			0.471962	0.0240835	0.0233511	0.00441919	0.0959949	0.227447	0.204471	0.249745	0.0210712	0.000961024	0.416867	0.365282	0.14319	0.13388
6.25	0.46772	0.0945765	0.0676972	0.0512868	0.0539739	0.58477	0.201177	0.325438	0.0615604	0.00460503	0.332272	0.00857516	0.275171	0.00252835			0.161728	0.0168138	0.0104154	0.00327549	0.0560449	0.0789994	0.126228	0.162264	0.0093619	0.00662495	0.339988	0.293281	0.0754313	0.0843347
3.125	0.331791	0.0695593	0.0527758	0.0266839	0.0410117	0.226984	0.18966	0.225916	0.0430168	0.00286035	0.173274	0.00297258	0.177789	0.00400826			0.0961376	0.0121741	0.00372917	-0.000192185	0.0276263	0.034796	0.0545167	0.0858713	0.0101005	-0.00369729	0.188463	0.189764	0.0279685	0.0356538
1.5625	0.135719	0.0353426	0.03124	0.0107837	0.0247154	0.0761463	0.0744061	0.134109	0.0185406	0.0011066	0.0881947	-0.000395993	0.0875134	0.00170932			0.0535793	0.000591474	0.000593378	-0.000542614	0.00405763	0.0161404	0.0210235	0.0407512	0.00184442	na	0.121831	0.0988097	-0.00372535	0.0116092
0.78125	0.0747557	0.016234	0.0180219	0.0079412	0.0117022	0.0669112	0.0582386	0.0761396	0.0109807	0.000234099	0.0399555	-0.00083117	0.0436109	0.00120027			0.0214925	0.00922079	0.00291501	na	na	0.0110393	0.0123623	0.0181834	0.00415765	na	0.0521446	0.0394451	-0.00864743	0.01183
0.390625	0.0272774	0.0141403	0.0132944	0.00668348	0.00959913	0.0422895	0.0278721	0.0414394	0.00554126	0.00131075	0.0241651	-0.00389643	0.0200599	-0.00361727			0.0086998	0.00180518	0.00559313	na	na	0.00432032	0.00315256	0.0109606	0.00133231	na	0.0264334	0.0280823	-0.0136962	0.00567929
0	0	0	0	0	na	0	0	0	0	0	0	0	0	0			0	0	0	0	na	0	0	0	0	na	0	0	0	0
	PP1-Neb 0.25 nM																PP1-Ph3 2.5 nM
	V1	V2	V3	V4	V5	V6	V7	V8	4ebp-pdz	4ebp-sgs	irsp53-pdz	irsp53-sgs	L5A-PDZ	L5A-SGS			V1	V2	V3	V4	V5	V6	V7	V8	4ebp-pdz	4ebp-sgs	irsp53-pdz	irsp53-sgs	L5A-PDZ	L5A-SGS
400	1.08241	0.0992185	0.0979389	0.066482	0.0750291	1.25178	0.311076	0.766972	0.125657	0.0539722	0.289717	0.210068	0.211871	0.163138			na	0.194356	0.235985	0.0954178	0.443346	na	na	na	0.246976	0.0375718	0.308205	0.30861	0.488265	0.70774
200	0.913219	0.0866246	0.100324	0.0572706	0.0657601	0.855998	0.255509	0.622879	0.0859227	0.0429015	0.213505	0.140073	0.189973	0.105271			na	0.161058	0.184635	0.0661584	0.41919	na	1.38308	na	0.210218	0.0250732	0.330939	0.386279	0.572625	1.08965
100	0.83729	0.0821954	0.088292	0.0575826	0.06471	1.29095	0.215568	0.527598	0.0699651	0.0375054	0.389149	0.109223	0.397818	0.132978			na	0.0909784	0.125909	0.035778	0.360276	1.05107	0.798124	na	0.104687	0.00813867	0.381837	0.35623	0.699337	0.705117
50	0.836436	0.0829819	0.0749117	0.0552607	0.0555144	0.6466	0.208408	0.362944	0.102681	0.014629	0.41537	0.0942013	0.268902	0.0893808			na	0.0830929	0.0730477	0.0228082	0.253254	0.89117	0.527199	0.986138	0.0832944	0.0147543	0.470255	0.363205	0.494329	0.334527
25	1.02661	0.068158	0.0844053	0.0404652	0.0652114	0.417153	0.139412	0.598611	0.0805759	0.0045773	0.433318	0.0602765	0.290541	0.0504475			1.42405	0.0470783	0.041815	0.00932911	0.194944	0.410673	0.397514	0.668954	0.0371243	0.0136965	0.401599	0.338963	0.263011	0.21807
12.5	0.612883	0.0834242	0.0701964	0.0289809	0.0586798	0.604232	0.195527	0.451558	0.0609412	0.000379855	0.347165	0.0410439	0.222605	0.0290427			0.44028	0.01456	0.0275003	0.00786394	0.102983	0.179088	0.213566	0.307506	0.0142792	0.00787785	0.334994	0.314214	0.133135	0.111902
6.25	0.288305	0.054786	0.0571766	0.035447	0.0499453	0.306112	0.167864	0.338372	0.0486599	-0.000664714	0.230561	0.0114015	0.179528	0.0163974			0.169955	0.0213779	0.023994	0.00461542	0.0543072	0.088606	0.0926506	0.130284	0.00442114	0.00636256	0.23979	0.235675	0.0665554	0.0656267
3.125	0.261301	0.0409646	0.0631994	0.0122747	0.0339522	0.159751	0.11947	0.223186	0.0367052	-0.00593175	0.130728	0.00118442	0.106192	0.00252741			0.0955865	0.0136991	0.01125	0.00102756	0.0253385	0.0361223	0.0434318	0.0738155	0.00441197	-0.00347593	0.153413	0.183229	0.0231341	0.0327996
1.5625	0.11537	0.0291378	0.0434969	0.0101507	0.0134317	0.067576	0.0692988	0.117315	0.026477	-0.00542373	0.0692819	0.000619457	0.0570339	0.00495629			0.0511142	0.0110959	0.0087596	-0.00748229	0.0106987	0.0254694	0.0234679	0.0383663	0.00247772	-0.00421131	0.0915025	0.0914345	0.0154534	0.00725534
0.78125	0.0633547	0.0109842	0.0324758	0.0058825	-0.000924023	0.0406969	0.0346985	0.0628286	0.0104583	-0.00707185	0.0375256	0.00101048	0.0332305	0.00400483			0.0212082	0.0219977	0.0141052	0.00591512	0.00275055	0.000182127	-0.00228671	0.0153842	0.00458352	0.00116009	0.0545153	0.0570758	0.00585875	0.00670096
0.390625	0.0393779	0.00105654	0.0243506	0.0152133	0.00834429	0.0529357	0.0314673	0.0460344	0.0110317	na	0.0397861	0.00275855	0.0164781	0.00261368			0.0064103	0.00707958	0.0147213	0.00315645	-0.00103284	0.00799801	0.0065564	0.00722614	-0.00970331	-0.00255311	0.0263298	0.0296276	0.00257656	0.00532733
0	0	0	0	0	na	0	0	0	0	0	0	0	0	0			0	0	0	0	0	0	0	0	0	0	0	0	0	0
	PP1-Neb 0.25 nM																PP1-Ph3 2.5 nM
	V1	V2	V3	V4	V5	V6	V7	V8	4ebp-pdz	4ebp-sgs	irsp53-pdz	irsp53-sgs	L5A-PDZ	L5A-SGS			V1	V2	V3	V4	V5	V6	V7	V8	4ebp-pdz	4ebp-sgs	irsp53-pdz	irsp53-sgs	L5A-PDZ	L5A-SGS
400	1.3857	0.0995833	0.0693166	0.0507359	0.0606554	1.48471	0.240112	0.738635	0.0985166	0.0198974	0.169911	0.111795	0.156769	0.0977117			na	0.156642	0.152496	0.0638201	0.330923	na	0.981657	na	0.242132	0.0233223	0.193188	0.266368	0.354726	0.410601
200	1.01613	0.092578	0.0713513	0.0478809	0.0575186	1.17356	0.262264	0.775749	0.106593	0.0415418	0.295942	0.125247	0.237991	0.106077			na	0.103583	0.138731	0.0584894	0.356715	1.35319	0.933504	na	0.213559	0.0207868	0.465686	0.371131	0.58283	0.503812
100	0.900462	0.0863291	0.0631444	0.031687	0.0490908	0.659706	0.186602	0.527166	0.0903389	0.0119631	0.275607	0.0937617	0.336529	0.0638358			na	0.0544827	0.0920266	0.0313495	0.274218	0.943669	0.684752	1.23409	0.122656	0.00841576	0.502965	0.349494	0.58225	0.411314
50	0.823869	0.0835502	0.0531594	0.0344255	0.0493496	0.567043	0.250676	0.569825	0.0807366	0.0103722	0.318131	0.0631533	0.253031	0.0383408			1.15497	0.0479639	0.0589432	0.0133198	0.163426	0.470727	0.457994	0.900374	0.0599728	0.00293756	0.489246	0.282072	0.419954	0.270284
25	0.574171	0.0818956	0.0714719	0.0486242	0.0386065	0.466869	0.170005	0.650299	0.0542805	0.00545921	0.40492	0.0263184	0.265452	0.017218			0.512398	0.0151225	0.0283111	0.00405936	0.153018	0.31019	0.189108	0.486053	0.0362126	0.00150137	0.473745	0.26726	0.229433	0.16563
12.5	0.392108	0.0756942	0.0554373	0.0195642	0.0382648	0.311124	0.160592	0.389346	0.0561783	0.00654919	0.248877	0.00999932	0.216714	0.00894458			0.262577	0.0129771	0.00481517	0.00480105	0.0642865	0.138144	0.168706	0.227555	0.0128734	0.000923005	0.300387	0.235729	0.110918	0.0870657
6.25	0.167799	0.0695659	0.0455943	0.0325212	0.0458158	0.248558	0.124221	0.260827	0.0380796	0.00501287	0.158571	-0.00625207	0.134371	0.00689349			0.110723	0.00953706	0.0100328	0.00212268	0.0454978	0.0658777	0.0834259	0.126426	0.00298149	-0.0051359	0.172065	0.186162	0.0573129	0.0476421
3.125	0.149785	0.0439991	0.0338088	0.0161273	0.0337083	0.117808	0.091579	0.16215	0.0267551	-0.000366711	0.100817	0.00502661	0.094774	0.00153245			0.0739655	0.00238381	-0.00409501	0.00338416	0.0273744	0.0311777	0.0410868	0.0803283	0.00128116	na	0.134872	0.139223	0.0284689	0.0261758
1.5625	0.0623325	0.0350182	0.0185382	0.00970757	0.0203369	0.0598496	0.05818	0.0956526	0.0106477	0.000312443	0.0587091	0.00701835	0.0588199	-0.000964655			0.0315497	-0.000887326	0.00457012	0.0040458	0.0149197	0.00391724	0.0152342	0.0258162	-0.00324207	-0.000339529	0.0683304	0.0769468	0.0123916	0.0148567
0.78125	0.0403279	0.026633	0.0150734	0.00723395	0.0163956	0.0437761	0.0327524	0.0473615	0.0040428	0.00233947	0.021066	-0.0181101	0.0268559	-0.00299487			0.0170521	-0.00038435	0.00135337	0.000967095	0.00952449	0.0132366	0.00421042	0.00950637	-0.0015475	na	0.0327973	0.043185	0.0131829	0.00594626
0.390625	0.00702993	0.00792509	0.00760926	0.00131185	0.00528752	0.0462867	0.0158608	0.0230638	-0.000255753	-0.00136408	0.00860375	0.00644303	0.0127169	0.000109938			0.0104397	0.00368749	-0.00166599	0.00155778	0.00282043	0.0167687	0.00903487	0.00488179	0.00408018	na	0.0169488	0.0241499	0.00527622	0.00510263
0	0	0	0	0	0	0	0	0	0	0	0	0	0	0			0	0	0	0	na	0	0	0	0	na	0	0	0	0
	2	18	34	50	2	18	34	50	2	18	34	50	2	18	34	50	2	18	34	50	2	18	34	50	2	18	34	50	2	18	34	50	2	18	34	50	2	18	34	50	2	18	34	50	2	18	34	50	2
	1	1	1	1	2	2	2	2	3	3	3	3	4	4	4	4	5	5	5	5	6	6	6	6	7	7	7	7	8	8	8	8	9	9	9	9	10	10	10	10	11	11	11	11	12	12	12	12	13
	PP1-Neurabin
	V1				V2				V3				V4				V5				V6				V7				V8				4EBP-FEMDI				4EBP-SGS				IRSP53-FEMDI				IRSP53-SGS				L5A-FEMDI
1	na	na	1.08241	1.3857	0.173826	0.151947	0.0992185	0.0995833	0.160699	0.144588	0.0979389	0.0693166	0.125635	0.0838937	0.066482	0.0507359	0.128136	0.102435	0.0750291	0.0606554	na	na	1.25178	1.48471	0.72245	0.604077	0.311076	0.240112	na	na	0.766972	0.738635	0.252627	0.19224	0.125657	0.0985166	0.106161	0.0749312	0.0539722	0.0198974	na	0.429513	0.289717	0.169911	0.366626	0.167085	0.210068	0.111795	0.441482
2	na	na	0.913219	1.01613	0.173149	0.155991	0.0866246	0.092578	0.161663	0.159108	0.100324	0.0713513	0.134387	0.094736	0.0572706	0.0478809	0.121154	0.105142	0.0657601	0.0575186	na	na	0.855998	1.17356	0.592879	0.514763	0.255509	0.262264	na	na	0.622879	0.775749	0.248783	0.181803	0.0859227	0.106593	0.0810078	0.05261	0.0429015	0.0415418	2.54823	0.3924	0.213505	0.295942	0.339037	0.0793724	0.140073	0.125247	0.890039
3	na	3.06381	0.83729	0.900462	0.153439	0.167101	0.0821954	0.0863291	0.135613	0.151223	0.088292	0.0631444	0.119137	0.085502	0.0575826	0.031687	0.110361	0.0969533	0.06471	0.0490908	na	na	1.29095	0.659706	0.466458	0.487249	0.215568	0.186602	na	1.48379	0.527598	0.527166	0.200666	0.128999	0.0699651	0.0903389	0.0382924	0.0476347	0.0375054	0.0119631	0.767894	0.433707	0.389149	0.275607	0.123519	0.126539	0.109223	0.0937617	1.19932
4	na	1.56626	0.836436	0.823869	0.161954	0.162617	0.0829819	0.0835502	0.126598	0.141246	0.0749117	0.0531594	0.117747	0.0915733	0.0552607	0.0344255	0.110329	0.0897731	0.0555144	0.0493496	na	na	0.6466	0.567043	0.419706	0.336885	0.208408	0.250676	na	1.0639	0.362944	0.569825	0.165557	0.127882	0.102681	0.0807366	0.0417299	0.0206159	0.014629	0.0103722	2.64189	0.464751	0.41537	0.318131	0.228676	0.0490116	0.0942013	0.0631533	1.0814
5	1.9435	1.30773	1.02661	0.574171	0.15586	0.147358	0.068158	0.0818956	0.109012	0.120306	0.0844053	0.0714719	0.104722	0.0820039	0.0404652	0.0486242	0.110419	0.0866498	0.0652114	0.0386065	1.7317	2.58722	0.417153	0.466869	0.439882	0.320197	0.139412	0.170005	2.81978	0.835783	0.598611	0.650299	0.139522	0.0990033	0.0805759	0.0542805	0.01735	0.01658	0.0045773	0.00545921	1.50043	0.432631	0.433318	0.40492	0.0865481	0.0449132	0.0602765	0.0263184	0.794812
6	1.42908	0.911174	0.612883	0.392108	0.18253	0.120605	0.0834242	0.0756942	0.108978	0.0976887	0.0701964	0.0554373	0.108246	0.0564647	0.0289809	0.0195642	0.112998	0.0782718	0.0586798	0.0382648	1.0307	0.83084	0.604232	0.311124	0.410511	0.374408	0.195527	0.160592	1.03576	0.589986	0.451558	0.389346	0.114448	0.104545	0.0609412	0.0561783	0.0143735	0.00264669	0.000379855	0.00654919	0.846638	0.425139	0.347165	0.248877	0.0415662	-0.00285879	0.0410439	0.00999932	0.484145
7	0.437384	0.46772	0.288305	0.167799	0.116531	0.0945765	0.054786	0.0695659	0.11174	0.0676972	0.0571766	0.0455943	0.0816059	0.0512868	0.035447	0.0325212	0.0696697	0.0539739	0.0499453	0.0458158	0.627832	0.58477	0.306112	0.248558	0.295357	0.201177	0.167864	0.124221	0.576339	0.325438	0.338372	0.260827	0.0869295	0.0615604	0.0486599	0.0380796	0.00951116	0.00460503	-0.000664714	0.00501287	0.501687	0.332272	0.230561	0.158571	0.0135288	0.00857516	0.0114015	-0.00625207	0.306897
8	0.26948	0.331791	0.261301	0.149785	0.0833248	0.0695593	0.0409646	0.0439991	0.0739418	0.0527758	0.0631994	0.0338088	0.0573629	0.0266839	0.0122747	0.0161273	0.0703508	0.0410117	0.0339522	0.0337083	0.253135	0.226984	0.159751	0.117808	0.176931	0.18966	0.11947	0.091579	0.293906	0.225916	0.223186	0.16215	0.0489174	0.0430168	0.0367052	0.0267551	0.00849948	0.00286035	-0.00593175	-0.000366711	0.203205	0.173274	0.130728	0.100817	0.00677543	0.00297258	0.00118442	0.00502661	0.169124
9	0.113925	0.135719	0.11537	0.0623325	0.0481815	0.0353426	0.0291378	0.0350182	0.0395719	0.03124	0.0434969	0.0185382	0.045047	0.0107837	0.0101507	0.00970757	0.0398056	0.0247154	0.0134317	0.0203369	0.11378	0.0761463	0.067576	0.0598496	0.0931818	0.0744061	0.0692988	0.05818	0.178059	0.134109	0.117315	0.0956526	0.0260431	0.0185406	0.026477	0.0106477	0.00967204	0.0011066	-0.00542373	0.000312443	0.109057	0.0881947	0.0692819	0.0587091	-0.00454559	-0.000395993	0.000619457	0.00701835	0.0912232
10	0.0699526	0.0747557	0.0633547	0.0403279	0.022215	0.016234	0.0109842	0.026633	0.0254797	0.0180219	0.0324758	0.0150734	0.0283275	0.0079412	0.0058825	0.00723395	0.025205	0.0117022	-0.000924023	0.0163956	0.0710237	0.0669112	0.0406969	0.0437761	0.0482496	0.0582386	0.0346985	0.0327524	0.0753333	0.0761396	0.0628286	0.0473615	0.00749305	0.0109807	0.0104583	0.0040428	0.00338852	0.000234099	-0.00707185	0.00233947	0.051568	0.0399555	0.0375256	0.021066	-0.00587007	-0.00083117	0.00101048	-0.0181101	0.0411851
11	0.0358468	0.0272774	0.0393779	0.00702993	0.0195062	0.0141403	0.00105654	0.00792509	0.0107775	0.0132944	0.0243506	0.00760926	0.0199816	0.00668348	0.0152133	0.00131185	0.0170428	0.00959913	0.00834429	0.00528752	0.0710723	0.0422895	0.0529357	0.0462867	0.0277471	0.0278721	0.0314673	0.0158608	0.0362849	0.0414394	0.0460344	0.0230638	0.00159616	0.00554126	0.0110317	-0.000255753	0.00426605	0.00131075	na	-0.00136408	0.0212839	0.0241651	0.0397861	0.00860375	0.00282687	-0.00389643	0.00275855	0.00644303	0.0239059
12	0	0	0	0	0	0	0	0	0	0	0	0	0	0	0	0	0	na	na	0	0	0	0	0	0	0	0	0	0	0	0	0	0	0	0	0	0	0	0	0	0	0	0	0	0	0	0	0	0
Normaalized to 1nM
	V1				V2				V3				V4				V5				V6				V7				V8				4EBP-FEMDI				4EBP-SGS				IRSP53-FEMDI				IRSP53-SGS				L5A-FEMDI
400	#VALUE!	#VALUE!	4.32962	5.54279	0.695304	0.607789	0.396874	0.398333	0.642798	0.578353	0.391756	0.277266	0.502541	0.335575	0.265928	0.202944	0.512542	0.409742	0.300116	0.242621	#VALUE!	#VALUE!	5.00711	5.93883	2.8898	2.41631	1.2443	0.960449	#VALUE!	#VALUE!	3.06789	2.95454	1.01051	0.76896	0.502626	0.394066	0.424643	0.299725	0.215889	0.0795895	#VALUE!	1.71805	1.15887	0.679646	1.4665	0.66834	0.840273	0.447179	1.76593
200	#VALUE!	#VALUE!	3.65288	4.06454	0.692596	0.623964	0.346499	0.370312	0.646654	0.636431	0.401294	0.285405	0.537547	0.378944	0.229082	0.191524	0.484617	0.420567	0.26304	0.230074	#VALUE!	#VALUE!	3.42399	4.69422	2.37152	2.05905	1.02204	1.04906	#VALUE!	#VALUE!	2.49151	3.103	0.995133	0.727213	0.343691	0.426374	0.324031	0.21044	0.171606	0.166167	na	1.5696	0.85402	1.18377	1.35615	0.31749	0.560293	0.500989	na
100	#VALUE!	na	3.34916	3.60185	0.613758	0.668403	0.328782	0.345316	0.542452	0.604891	0.353168	0.252578	0.476547	0.342008	0.23033	0.126748	0.441443	0.387813	0.25884	0.196363	#VALUE!	#VALUE!	5.16381	2.63883	1.86583	1.949	0.862271	0.746407	#VALUE!	na	2.11039	2.10866	0.802664	0.515998	0.27986	0.361355	0.15317	0.190539	0.150022	0.0478525	na	1.73483	1.5566	1.10243	0.494076	0.506157	0.436893	0.375047	na
50	#VALUE!	na	3.34574	3.29548	0.647814	0.650468	0.331928	0.334201	0.506392	0.564982	0.299647	0.212638	0.470987	0.366293	0.221043	0.137702	0.441318	0.359092	0.222057	0.197398	#VALUE!	#VALUE!	2.5864	2.26817	1.67882	1.34754	0.833631	1.00271	#VALUE!	na	1.45178	2.2793	0.662229	0.51153	0.410723	0.322947	0.166919	0.0824638	0.0585158	0.0414889	na	1.859	1.66148	1.27252	0.914703	0.196046	0.376805	0.252613	na
25	na	na	4.10645	2.29669	0.623439	0.589433	0.272632	0.327582	0.436049	0.481224	0.337621	0.285888	0.418889	0.328016	0.161861	0.194497	0.441678	0.346599	0.260846	0.154426	na	na	1.66861	1.86748	1.75953	1.28079	0.557646	0.68002	na	3.34313	2.39445	2.6012	0.558087	0.396013	0.322303	0.217122	0.0694	0.0663198	0.0183092	0.0218368	na	1.73052	1.73327	1.61968	0.346192	0.179653	0.241106	0.105274	na
12.5	na	3.6447	2.45153	1.56843	0.730122	0.482419	0.333697	0.302777	0.435914	0.390755	0.280786	0.221749	0.432983	0.225859	0.115924	0.078257	0.451991	0.313087	0.234719	0.153059	na	3.32336	2.41693	1.2445	1.64205	1.49763	0.782109	0.642368	na	2.35994	1.80623	1.55738	0.457793	0.418179	0.243765	0.224713	0.0574939	0.0105867	0.00151942	0.0261968	na	1.70056	1.38866	0.99551	0.166265	-0.0114352	0.164176	0.0399973	1.93658
6.25	1.74953	1.87088	1.15322	0.671196	0.466125	0.378306	0.219144	0.278264	0.446959	0.270789	0.228706	0.182377	0.326424	0.205147	0.141788	0.130085	0.278679	0.215896	0.199781	0.183263	2.51133	2.33908	1.22445	0.994231	1.18143	0.80471	0.671455	0.496885	2.30535	1.30175	1.35349	1.04331	0.347718	0.246241	0.19464	0.152318	0.0380446	0.0184201	-0.00265886	0.0200515	na	1.32909	0.922244	0.634283	0.0541154	0.0343006	0.0456062	-0.0250083	1.22759
3.125	1.07792	1.32716	1.0452	0.599139	0.333299	0.278237	0.163858	0.175996	0.295767	0.211103	0.252798	0.135235	0.229452	0.106736	0.0490988	0.0645091	0.281403	0.164047	0.135809	0.134833	1.01254	0.907937	0.639005	0.471233	0.707723	0.758638	0.47788	0.366316	1.17562	0.903665	0.892746	0.648599	0.19567	0.172067	0.146821	0.10702	0.0339979	0.0114414	-0.023727	-0.00146685	0.812819	0.693097	0.522914	0.40327	0.0271017	0.0118903	0.00473769	0.0201065	0.676497
1.5625	0.455702	0.542875	0.461479	0.24933	0.192726	0.14137	0.116551	0.140073	0.158288	0.12496	0.173988	0.0741526	0.180188	0.0431346	0.0406026	0.0388303	0.159223	0.0988615	0.053727	0.0813476	0.455121	0.304585	0.270304	0.239398	0.372727	0.297624	0.277195	0.23272	0.712236	0.536438	0.469259	0.38261	0.104172	0.0741626	0.105908	0.0425909	0.0386882	0.00442639	-0.0216949	0.00124977	0.43623	0.352779	0.277128	0.234836	-0.0181824	-0.00158397	0.00247783	0.0280734	0.364893
0.78125	0.279811	0.299023	0.253419	0.161312	0.0888601	0.0649361	0.0439369	0.106532	0.101919	0.0720877	0.129903	0.0602935	0.11331	0.0317648	0.02353	0.0289358	0.10082	0.0468089	na	0.0655825	0.284095	0.267645	0.162788	0.175104	0.192998	0.232954	0.138794	0.13101	0.301333	0.304559	0.251314	0.189446	0.0299722	0.0439228	0.041833	0.0161712	0.0135541	0.000936396	-0.0282874	0.00935787	0.206272	0.159822	0.150103	0.084264	-0.0234803	-0.00332468	0.00404193	na	0.16474
0.390625	0.143387	0.10911	0.157512	0.0281197	0.0780248	0.0565612	na	0.0317004	0.0431099	0.0531774	0.0974025	0.0304371	0.0799262	0.0267339	0.0608534	0.00524741	0.0681711	0.0383965	0.0333772	0.0211501	0.284289	0.169158	0.211743	0.185147	0.110989	0.111488	0.125869	0.0634431	0.145139	0.165758	0.184137	0.0922552	0.00638464	0.0221651	0.0441268	-0.00102301	0.0170642	0.005243	#VALUE!	-0.0054563	0.0851357	0.0966605	0.159144	0.034415	0.0113075	-0.0155857	0.0110342	0.0257721	0.0956234
0	0	0	0	0	0	0	0	0	0	0	0	0	0	0	0	0	0	0	0	0	0	0	0	0	0	0	0	0	0	0	0	0	0	0	0	0	0	0	0	0	0	0	0	0	0	0	0	0	0
PP1-Neurabin
	V1	V2	V3	V4	V5	V6	V7	V8	4EBP-FEMDI	4EBP-SGS	IRSP53-FEMDI	IRSP53-SGS	L5A-FEMDI	L5A-SGS
Catalytic efficiency - Michaelis-Menten
Best-fit values
CE	0.416	0.1488	0.1221	0.06504	0.108	0.3096	0.2673	0.4393	0.04675	0.002009	0.2572	0.01125	0.303	0.01124
Km	9.717	3.527	3.734	5.013	3.151	8.993	5.542	6.113	14.42	233.7	9.033	84.55	5.377	89.23
Std. Error
CE	0.05969	0.0398	0.03064	0.02337	0.02964	0.04139	0.07853	0.04916	0.01042	0.000432	0.03233	0.003587	0.06356	0.002904
Km	1.75	1.079	1.075	2.094	0.9846	1.617	1.903	0.8394	4.101	126.9	1.854	45.46	1.403	40.67
95% CI (profile likelihood)
CE	0.3145 to 0.5510	0.08963 to 0.2543	0.07228 to 0.2109	0.03156 to 0.1412	0.06311 to 0.1914	0.2342 to 0.4076	0.1461 to 0.4983	0.3526 to 0.5488	0.02835 to 0.07873	0.001285 to 0.003141	0.1994 to 0.3321	0.005907 to 0.02143	0.2045 to 0.4554	0.006954 to 0.01848
Km	6.830 to 13.78	1.913 to 6.301	1.996 to 6.843	2.041 to 11.72	1.644 to 5.817	6.228 to 13.15	2.684 to 11.31	4.651 to 7.994	7.470 to 27.84	92.08 to 1663	6.042 to 13.97	31.48 to 328.1	3.253 to 8.779	39.98 to 236.9
Goodness of Fit
Degrees of Freedom	33	41	42	42	41	27	42	31	40	41	27	41	35	41
R squared	0.9118	0.7232	0.7378	0.5863	0.7113	0.9324	0.6904	0.9448	0.7929	0.8068	0.9348	0.6727	0.8241	0.7436
Sum of Squares	5.99	0.5742	0.3936	0.403	0.25	1.358	5.505	1.574	0.5178	0.04703	0.6471	1.088	2.467	0.7333
Sy.x	0.426	0.1183	0.09681	0.09795	0.07808	0.2243	0.362	0.2253	0.1138	0.03387	0.1548	0.1629	0.2655	0.1337
Number of points
# of X values	44	44	44	44	44	44	44	44	44	44	44	44	44	44
# Y values analyzed	35	43	44	44	43	29	44	33	42	43	29	43	37	43
PP1-Phactr1
	V1	V2	V3	V4	V5	V6	V7	V8	4EBP-FEMDI	4EBP-SGS	IRSP53-FEMDI	IRSP53-SGS	L5A-FEMDI	L5A-SGS
Catalytic efficiency - Michaelis-Menten
Best-fit values
CE	0.02035	0.000557	0.0007056	0.0001871	0.003798	0.0102	0.00822	0.01388	0.0005933	7.655e-05	0.03247	0.03156	0.006146	0.004851
Km	Unstable	277.9	236.3	759.6	62.37	74.38	94.41	61.96	1282	295.3	7.63	6.205	96.87	119
Std. Error
CE	0.001638	9.737e-05	7.497e-05	2.261e-05	0.0003967	0.001243	0.001566	0.001452	5.731e-05	1.955e-05	0.007357	0.006903	0.001968	0.0008703
Km	Unstable	134.6	63.73	501	10.14	17.09	33.71	14.46	1038	216.3	2.057	1.596	54.46	41.46
95% CI (profile likelihood)
CE	0.01702 to 0.02368	0.0003876 to 0.0007987	0.0005676 to 0.0008773	0.0001473 to 0.0002389	0.003080 to 0.004698	0.008118 to 0.01287	0.005813 to 0.01185	0.01143 to 0.01695	0.0005018 to 0.0007198	4.538e-005 to 0.0001306	0.02137 to 0.05032	0.02041 to 0.04959	0.003357 to 0.01145	0.003418 to 0.006947
Km	(Very wide)	121.9 to 1416	144.0 to 456.0	294.9 to ???	45.22 to 87.43	48.98 to 116.4	50.15 to 193.5	40.99 to 98.95	451.1 to ???	91.47 to ???	4.546 to 12.56	3.655 to 10.39	36.28 to 366.8	62.91 to 260.2
Goodness of Fit
Degrees of Freedom	33	42	42	40	40	37	40	35	42	36	42	42	42	41
R squared	0.7797	0.8602	0.9434	0.9325	0.9492	0.915	0.8325	0.9424	0.957	0.7824	0.8016	0.8036	0.6659	0.8521
Sum of Squares	0.9592	0.002803	0.001464	0.0002446	0.008544	0.07852	0.2089	0.04759	0.001909	0.0001011	0.08807	0.05266	0.3992	0.09391
Sy.x	0.1705	0.008169	0.005904	0.002473	0.01461	0.04607	0.07226	0.03687	0.006742	0.001676	0.04579	0.03541	0.09749	0.04786
Number of points
# of X values	44	44	44	44	44	44	44	44	44	44	44	44	44	44
# Y values analyzed	35	44	44	42	42	39	42	37	44	38	44	44	44	43
PP1-Neurabin		Catalytic efficiency - Michaelis-Menten	Best-fit values	CE	Km	Std. Error	CE	Km	95% CI (profile likelihood)	CE	Km	Goodness of Fit	Degrees of Freedom	R squared	Sum of Squares	Sy.x		Number of points	# of X values	# Y values analyzed			PP1-Phactr1		Catalytic efficiency - Michaelis-Menten	Best-fit values	CE	Km	Std. Error	CE	Km	95% CI (profile likelihood)	CE	Km	Goodness of Fit	Degrees of Freedom	R squared	Sum of Squares	Sy.x		Number of points	# of X values	# Y values analyzed
	V1		500.7	0.5007	11.85		0.1806	5.464		0.2648 to 0.9919	5.013 to 26.88		38	0.6185	99.96	1.622			44	40				V1		20.35	0.02035	Unstable		0.001638	Unstable		0.01702 to 0.02368	(Very wide)		33	0.7797	0.9592	0.1705			44	35
	V2		147.3	0.1473	3.567		0.03875	1.075		0.08953 to 0.2482	1.965 to 6.309		42	0.7332	0.5764	0.1172			44	44				V2		0.557	0.000557	277.9		9.737e-05	134.6		0.0003876 to 0.0007987	121.9 to 1416		42	0.8602	0.002803	0.008169			44	44
	V3		122.1	0.1221	3.734		0.03064	1.075		0.07228 to 0.2109	1.996 to 6.843		42	0.7378	0.3936	0.09681			44	44				V3		0.7056	0.0007056	236.3		7.497e-05	63.73		0.0005676 to 0.0008773	144.0 to 456.0		42	0.9434	0.001464	0.005904			44	44
	V4		65.04	0.06504	5.013		0.02337	2.094		0.03156 to 0.1412	2.041 to 11.72		42	0.5863	0.403	0.09795			44	44				V4		0.1871	0.0001871	759.6		2.261e-05	501		0.0001473 to 0.0002389	294.9 to ???		40	0.9325	0.0002446	0.002473			44	42
	V5		103.5	0.1035	3.304		0.02845	1.037		0.06058 to 0.1813	1.743 to 6.093		40	0.6916	0.2549	0.07983			44	42				V5		3.798	0.003798	62.37		0.000407	10.4		0.003062 to 0.004726	44.82 to 88.28		38	0.9472	0.008544	0.01499			44	40
	V6		550.4	0.5504	8.405		0.2336	4.514		0.2676 to 1.209	3.137 to 20.73		36	0.5378	83.02	1.519			44	38				V6		10.2	0.0102	74.38		0.001243	17.09		0.008118 to 0.01287	48.98 to 116.4		37	0.915	0.07852	0.04607			44	39
	V7		267.3	0.2673	5.542		0.07853	1.903		0.1461 to 0.4983	2.684 to 11.31		42	0.6904	5.505	0.362			44	44				V7		8.22	0.00822	94.41		0.001566	33.71		0.005813 to 0.01185	50.15 to 193.5		40	0.8325	0.2089	0.07226			44	42
	V8		583.3	0.5833	6.594		0.297	4.098		0.2500 to 1.528	2.055 to 18.39		38	0.4512	92.61	1.561			44	40				V8		13.88	0.01388	61.96		0.001452	14.46		0.01143 to 0.01695	40.99 to 98.95		35	0.9424	0.04759	0.03687			44	37
	4EBP-FEMDI		56.03	0.05603	10.54		0.01493	3.414		0.03185 to 0.1004	5.213 to 21.24		42	0.7378	0.6577	0.1251			44	44				4EBP-FEMDI		0.5933	0.0005933	1282		5.731e-05	1038		0.0005018 to 0.0007198	451.1 to ???		42	0.957	0.001909	0.006742			44	44
	4EBP-SGS		2.009	0.002009	233.7		0.000432	126.9		0.001285 to 0.003141	92.08 to 1663		41	0.8068	0.04703	0.03387			44	43				4EBP-SGS		0.07655	7.655e-05	295.3		2.012e-05	222.6		4.495e-005 to 0.0001328	88.71 to ???		34	0.7781	0.0001011	0.001724			44	36
	IRSP53-FEMDI		355.2	0.3552	9.527		0.2497	8.084		0.1002 to 1.494	1.716 to 46.10		42	0.3041	153	1.909			44	44				IRSP53-FEMDI		32.47	0.03247	7.63		0.007357	2.057		0.02137 to 0.05032	4.546 to 12.56		42	0.8016	0.08807	0.04579			44	44
	IRSP53-SGS		11.22	0.01122	84.9		0.003545	45.28		0.005933 to 0.02121	31.94 to 323.9		42	0.6768	1.094	0.1614			44	44				IRSP53-SGS		31.56	0.03156	6.205		0.006903	1.596		0.02041 to 0.04959	3.655 to 10.39		42	0.8036	0.05266	0.03541			44	44
	L5A-FEMDI		267.9	0.2679	8.369		0.1152	4.309		0.1222 to 0.6322	3.022 to 21.59		42	0.5297	25.66	0.7817			44	44				L5A-FEMDI		6.146	0.006146	96.87		0.001968	54.46		0.003357 to 0.01145	36.28 to 366.8		42	0.6659	0.3992	0.09749			44	44
	L5A-SGS		12.62	0.01262	64.08		0.003859	30.69		0.007293 to 0.02231	27.84 to 165.9		42	0.6923	0.8828	0.145			44	44				L5A-SGS		4.851	0.004851	119		0.0008703	41.46		0.003418 to 0.006947	62.91 to 260.2		41	0.8521	0.09391	0.04786			44	43
[truncated: 75 more columns]
