# Supplementary material for: PDZ-directed substrate recruitment is the primary determinant of specific 4E-BP1 dephosphorylation by PP1-Neurabin
Source: eLife journal article supplement (doi:10.7554/elife.103403), 2024-11-20
Supplement: fig5-data1 [file 221020 data analysis.xlsx]

## Sheet: Sheet1
rep1	PP1-Neb 0.25 nM																PP1-Ph1 1.25 nM
	4EBP-70-PDZ	4EBP-70-SGS	IRSp53-PDZ	IRSp53-SGS	4EBP-101-PDZ	4EBP-101-SGS	L5A-PDZ	L5A-SGS	V1	V2	V3	V5	V6	V7	V8		4EBP-70-PDZ	4EBP-70-SGS	IRSp53-PDZ	IRSp53-SGS	4EBP-101-PDZ	4EBP-101-SGS	L5A-PDZ	L5A-SGS	V1	V2	V3	V5	V6	V7	V8
400	0.0314653	0.000651851	0.0386169	0.00401136	-0.000344788	-0.00344724	0.0219879	-0.00176759	0.195692	0.0156508	0.00752025	0.0184835	0.0525703	0.0275714	0.0239772		0.0164358	0.00240897	0.0372317	0.0462558	0.00815277	-0.0019135	0.239063	0.231235	0.425293	0.0128774	0.0239298	0.404549	0.174786	0.145482	0.154589
200	0.0148544	-0.00100829	0.0419501	0.00107576	0.000733928	-0.000118914	0.0180337	0.00107191	0.131509	0.0146956	0.00765603	0.0179139	0.0522159	0.0293524	0.023595		0.00756877	0.00294868	0.0342586	0.0357585	0.00228786	-0.000228248	0.0944347	0.0940501	0.137181	0.0088579	0.0129105	0.239658	0.0948251	0.0906634	0.0949218
100	0.0230074	-0.000670751	0.0338238	0.00324718	-0.00089288	0.00150522	0.02301	0.00237025	0.101239	0.0194358	0.00608821	0.0173488	0.0429793	0.0254661	0.0269088		0.00175006	0.0011773	0.0207852	0.0299248	na	0.00737373	0.0366911	0.0435011	0.0958717	0.00515275	0.00753169	0.128515	0.0424919	0.0473773	0.0495148
50	0.020953	-0.00482524	0.0325689	0.00101444	-0.00158843	0.00073308	0.0193494	0.00124648	0.0802163	0.0162782	0.00664394	0.0118875	0.033348	0.0248286	0.020663		-0.000666576	-0.00376484	0.0210461	0.0210429	0.00255342	-0.00237219	0.0193245	0.0210464	0.0475589	0.00282365	0.00498046	0.0657102	0.0228018	0.0276946	0.0312573
25	0.0262033	-0.00178952	0.0310209	0.000130089	0.00084989	0.000326027	0.0188208	0.000244738	0.0739073	0.0136788	0.00578062	0.0104551	0.0301037	0.0227468	0.0200017		-0.00322917	0.00252577	0.0235159	0.0191126	0.00270982	-0.00112724	0.00818894	0.0108106	0.0229944	0.000442304	0.00301445	0.0336664	0.0133281	0.0165539	0.0179079
12.5	0.0128492	-0.00156518	0.024093	-0.000287056	-0.00144298	0.00115335	0.0112338	-0.000215987	0.0399381	0.0109499	0.00421143	0.00746684	0.0211836	0.0171262	0.0156553		-0.00108185	-0.000650861	0.0162385	0.0167705	0.000355055	-0.00117746	0.000553324	0.00479203	0.0104193	0.00151626	0.00301807	0.0145053	0.00566518	0.00827542	0.00882791
6.25	0.0130702	-0.000819952	0.015643	-0.000490436	-5.86787e-05	-0.000194767	0.00750193	0.000493876	0.0258897	0.00728416	0.00269742	0.0060862	0.0186276	0.0127958	0.0120719		-7.08972e-05	0.00110256	0.0142852	0.0123244	-0.000347063	0.000424143	0.00160117	0.00279043	0.0043367	0.000611956	0.0034439	0.00853522	0.00334509	0.00536199	0.00598146
3.125	0.0102715	-0.0010727	0.00914305	-0.000618018	-0.00159035	-0.00101295	0.00357425	0.00010153	0.0161323	0.00431139	0.00124429	0.00442855	0.009775	0.00781217	0.00736978		-0.00053689	-0.00061865	0.0088445	0.00902498	0.000238269	0.000656445	0.00115666	0.00215198	0.00191151	0.00168543	0.0026665	0.0031399	0.00181466	0.00322022	0.00332621
1.5625	0.00407652	-0.0029414	0.00483663	-0.000889699	-0.00327521	0.000692592	0.00188792	-5.22112e-06	0.00739551	0.00287062	0.000142801	0.00250934	0.00491751	0.00480019	0.00462705		-0.000544154	-0.000482903	0.00485727	0.00479717	0.000440471	0.00114564	0.000610913	0.00158605	0.000595768	0.000952104	0.00271184	0.00128321	0.00202779	0.00312643	0.00363381
0.78125	0.00382928	-0.00175926	0.00196923	-0.00139976	-7.40028e-05	-0.000450851	0.00116225	0.00101523	0.00442489	0.00122128	-0.000480065	0.000583068	0.00287018	0.00209392	0.00282664		-0.00133028	0.00215915	0.0015036	0.00223444	-0.000281749	9.98775e-05	-0.000561779	0.00130969	1.40397e-05	5.75095e-05	0.00281256	0.00138545	0.000225625	0.00192414	0.00307937
0.390625	0.00231217	-0.000287583	na	-0.00126933	-0.000152793	0.000937098	0.000438908	0.000733319	0.00152249	0.000727756	-0.000556211	-0.00037308	0.000981864	0.00122078	0.0015681		-0.000706805	0.000811309	0.00142804	0.000211352	0.00070081	-0.000264796	-4.6931e-05	-0.000565901	-0.000159325	0.000309712	0.00152534	0.000704023	0.00124306	0.000840296	0.00173771
0	0	0	0	0	0	0	0	0	0	0	0	0	0	0	0		0	0	0	0	0	0	0	0	0	0	0	0	0	0	0
rep2	PP1-Neb 0.25 nM																PP1-Ph1 1.25 nM
	4EBP-70-PDZ	4EBP-70-SGS	IRSp53-PDZ	IRSp53-SGS	4EBP-101-PDZ	4EBP-101-SGS	L5A-PDZ	L5A-SGS	V1	V2	V3	V5	V6	V7	V8		4EBP-70-PDZ	4EBP-70-SGS	IRSp53-PDZ	IRSp53-SGS	4EBP-101-PDZ	4EBP-101-SGS	L5A-PDZ	L5A-SGS	V1	V2	V3	V5	V6	V7	V8
400	0.0144231	0.00186975	0.0336633	0.000993724	0.000148538	0.000931778	0.0324654	0.000967463	0.279669	0.0179906	0.0122169	0.0247311	0.199925	0.060729	0.341858		0.00887385	0.000810067	0.0274037	0.0385719	-0.000508021	-0.000242211	0.430692	0.0515605	0.158427	0.00239362	0.0172545	0.117649	0.0738076	0.112998	0.251052
200	0.0112237	0.00225364	0.0224471	0.00143608	0.000336509	0.00158242	0.0216	0.00336055	0.106775	0.0115493	0.00899161	0.0173413	0.0780363	0.0369103	0.110005		0.00408127	0.00331116	0.0278407	0.0211452	0.00117243	-0.000690457	0.0665009	0.028234	0.0539457	0.00195168	0.0126897	0.0568359	0.0327916	0.0528902	0.0844342
100	0.012932	0.00215841	0.0320685	-0.000401621	0.000173496	-0.000473216	0.024284	0.00153041	0.119077	0.014462	0.0103939	0.0209146	0.128372	0.0428123	0.186323		0.00201003	0.00125819	0.0229043	0.0296955	-0.000779345	-0.00122362	0.0484062	0.0231399	0.0397169	0.000935171	0.0108182	0.0639454	0.0276596	0.0362117	0.0716199
50	0.0115923	0.00195669	0.028899	0.00109965	0.000229428	-0.000822437	0.0228425	0.0016286	0.12891	0.0133263	0.0097047	0.0218631	0.109365	0.0527084	0.151816		0.00154296	0.00165757	0.0250852	0.026736	-0.000648466	-0.00142256	0.0190762	0.0134115	0.0237394	0.000419728	0.00824794	0.0337316	0.0127938	0.020526	0.0318458
25	0.00604944	-0.000805532	0.0176719	-0.00180362	0.000859708	9.14239e-06	0.0168098	0.000676352	0.057383	0.00893223	0.00626156	0.0132869	0.0626045	0.0295376	0.0714209		0.00100652	0.000587584	0.0182846	0.0169643	-0.000767944	-0.00113975	0.00409376	0.00500013	0.00729588	0.000121929	0.0077942	0.0118033	0.00552517	0.00592771	0.0110912
12.5	0.00498369	0.000976254	0.0137456	0.00120226	-0.000456196	-0.000142151	0.0116505	0.00182242	0.0467674	0.00835872	0.00614382	0.00984372	0.0455626	0.027005	0.0667194		-1.33364e-05	-0.000295133	0.0139064	0.016608	-0.000372122	-0.000933671	0.00118464	0.00304465	0.00462616	-0.000395581	0.00437712	0.00658099	0.00224095	0.00381875	0.00514568
6.25	0.00145235	0.000133722	0.00792327	-0.000169217	-0.00051886	-0.00117313	0.0069691	0.00087668	0.0255581	0.00256642	-0.00604333	0.00469373	0.0185041	0.0152007	0.0259994		0.000386702	-0.00324179	0.0057475	0.0065568	-0.000286643	-0.00407812	-0.00820119	-0.00122103	-0.000203027	-0.000600499	0.00187975	0.00233647	0.00100849	0.0013234	0.000211239
3.125	0.001165	0.000403246	0.00608251	-0.000104636	-0.000578917	-0.00151957	0.00253436	na	0.0141425	0.00363736	0.000251915	0.00295866	0.0142733	0.0107714	0.0213134		0.000598571	-0.000374019	0.00588917	0.00800055	-0.00110088	-0.00249077	-0.00430638	0.00120119	0.00049974	-0.000189316	0.00553556	0.00182033	-0.000170071	0.000201756	-0.000964363
1.5625	0.000728603	0.000172144	0.0037475	0.000978068	-0.000557574	0.000769561	0.00278594	na	0.00988182	0.00158399	0.000447914	0.00063629	0.0076178	0.0070051	0.011488		0.000390391	0.000944761	0.00250932	0.0050612	-0.000379534	-0.000158454	-0.00396682	0.000310717	0.000324595	-0.000319154	0.00686062	0.00153992	-0.000695282	-0.000568168	-0.00106629
0.78125	0.000500816	0.000113945	0.00100029	-0.000335672	-0.000700972	-0.000455889	0.00311982	na	0.00452874	0.000966109	0.000333173	-0.00201336	0.00294618	0.00639593	0.00387248		0.00239202	0.000379385	0.00270994	0.00236596	0.000485002	-0.00124717	-0.000812727	-0.000745883	-0.00690842	-0.00041949	0.00236044	-0.00254154	-0.000774837	0.000123963	-0.00266624
0.390625	-0.000501164	0.000227988	0.00104275	-0.000354395	-9.39761e-05	0.000206021	-5.96359e-05	0.000121962	-0.00219282	0.00808667	-0.000163516	0.000604374	0.00646503	-0.000252428	0.00238916		-0.00533994	-0.00375178	0.000446572	0.000266451	-3.36917e-05	-0.000471464	0.0019212	0.000333311	-0.00499354	-0.000585075	0.00932526	-0.000163078	-0.00207525	-0.00675918	-0.00144744
0	0	0	0	0	0	0	0	0	0	na	0	0	0	0	0		0	0	0	0	0	0	0	0	0	0	0	0	0	0	0
rep3	PP1-Neb 0.25 nM																PP1-Ph1 1.25 nM
	4EBP-70-PDZ	4EBP-70-SGS	IRSp53-PDZ	IRSp53-SGS	4EBP-101-PDZ	4EBP-101-SGS	L5A-PDZ	L5A-SGS	V1	V2	V3	V5	V6	V7	V8		4EBP-70-PDZ	4EBP-70-SGS	IRSp53-PDZ	IRSp53-SGS	4EBP-101-PDZ	4EBP-101-SGS	L5A-PDZ	L5A-SGS	V1	V2	V3	V5	V6	V7	V8
400	0.0088723	0.00332366	0.0267646	0.000165177	0.000382336	0.000134678	0.0211488	0.00200058	0.0629893	0.00334293	0.0107424	0.0213006	0.0964302	0.0251608	0.118229		0.0143923	0.0049498	0.0508331	0.0198101	-0.000894799	0.00141821	0.135551	0.200246	0.465461	0.0116136	0.0155024	1.1876	0.174192	0.161888	0.329192
200	0.00958186	0.000829354	0.0278253	0.00138051	-0.00111169	-0.00119604	0.0166041	-0.00327133	0.0365138	0.00311258	0.00819488	0.0147357	0.0513601	0.0366365	0.0984383		0.00792469	0.0006432	0.030307	0.0233	0.00285216	0.00139282	0.068106	0.0772968	0.196272	0.00485012	0.00963399	0.387862	0.0794939	0.108711	0.112578
100	0.00764956	0.00227272	0.0186826	0.00103086	-0.0014539	-0.00312322	0.0133682	0.000982451	0.0317639	0.00392698	0.00851226	0.0155056	0.0481567	0.0214842	0.0617376		0.00272723	-2.97544e-05	0.0278903	0.0180684	0.00134368	0.000979555	0.0277845	0.0407642	0.0962431	0.00353336	0.00663987	0.133549	0.0427749	0.0481941	0.0707266
50	0.00525155	0.00217858	0.0114471	-0.00047254	5.41168e-06	-0.0034856	0.0137289	0.000223643	0.0341616	-9.36416e-05	0.00123217	0.0160689	0.0424223	0.0308394	0.0565342		0.00125456	9.15939e-05	0.0281756	0.0186781	-0.0014397	0.00162752	0.00815801	0.0195112	0.0458335	0.00214584	0.00550191	0.0599138	0.0210065	0.030558	0.0337634
25	0.00417015	0.00197386	0.0151477	0.000605612	-0.000696867	-0.0024758	0.0127287	-0.000599907	0.0249574	0.00413321	0.00704242	0.0105744	0.0244369	0.0270573	0.0436563		-0.000194295	-0.0017672	0.0236638	0.0145282	0.000654842	0.00070437	0.00445432	0.0083114	0.0220181	0.000884877	0.00418765	0.0269732	0.010844	0.0129778	0.0176655
12.5	0.0034532	0.00285342	0.00970571	-0.00048617	-0.000521716	-0.00304504	0.00931928	-6.5799e-05	0.0182724	0.000704675	0.00478153	0.00816313	0.0194473	0.0163987	0.0301642		0.000500346	-0.00082232	0.0180343	0.0106504	-0.000914961	0.000657584	0.00102931	0.0031295	0.00380719	0.00096717	0.00267285	0.0122993	0.00408862	0.00854046	0.00829658
6.25	0.00265522	0.00249914	0.00637151	-0.000638329	-0.000164357	-0.00281577	0.00492851	-2.88227e-05	0.00797098	-0.00100525	0.0035002	0.00539927	0.00690149	0.0132711	0.0178521		0.000478491	0.00136392	0.0127359	0.00942986	-0.000705031	0.000275235	-0.00217983	-0.00068049	0.00391799	0.0010802	0.00253593	0.0025344	0.00207247	0.00583108	0.0033964
3.125	0.00106864	0.00185496	0.00420166	-0.00096598	-0.000196238	-0.00219629	0.00207677	-0.000548608	0.00296575	-0.00201232	0.00301481	0.00347168	0.00196959	0.00561177	0.0104395		-0.000434675	-0.000481578	0.00935849	0.00550361	-0.00100844	0.000774507	-0.00122115	0.000644963	0.00204696	0.00111612	0.00324707	0.00287084	0.000963357	0.0032724	0.00115046
1.5625	-0.000345175	0.00207464	0.000676983	-0.000976433	-0.000983264	-0.00266951	0.0011787	-0.00172569	0.000269435	-0.00385493	0.00286274	0.000898355	-0.00103819	0.00522301	0.00568899		9.75986e-05	-0.000151596	0.00459566	0.00378225	-0.000310614	0.000772238	-0.0026119	0.00506323	0.00120394	-0.00109663	0.00350302	-9.67014e-05	0.0036642	0.00318072	0.000660328
0.78125	-0.00124141	0.00354774	-0.000522366	-0.00286343	-0.0006084	-0.00212974	0.00115607	7.13028e-05	0.00293789	-0.00205075	5.69822e-05	-0.00167455	-0.00243642	0.00249018	0.0029519		0.000953713	-1.0627e-05	0.00349393	0.00354015	0.000755342	0.000987854	-0.0020024	0.0070952	-0.00224497	0.000957101	0.00210215	-0.00192222	9.01138e-05	0.00281589	-0.000532532
0.390625	-0.000711514	-0.00098639	0.000339987	0.00330005	-0.000206603	-0.00186496	4.11048e-05	0.000416148	0.00153579	-0.00401937	0.00451372	-0.00474231	-0.00326375	-0.000788376	0.000676247		0.000612349	-0.000345134	0.000721598	0.000830389	0.000206975	0.00627475	-0.00209446	-0.00219826	6.11934e-05	0.000761816	0.00233234	0.000278801	0.0007908	0.00021075	-0.000143671
0	0	0	0	0	0	0	0	0	0	0	0	0	0	0	0		0	0	0	0	0	0	0	0	0	0	0	0	0	0	0
rep4	PP1-Neb 0.25 nM																PP1-Ph1 1.25 nM
	4EBP-70-PDZ	4EBP-70-SGS	IRSp53-PDZ	IRSp53-SGS	4EBP-101-PDZ	4EBP-101-SGS	L5A-PDZ	L5A-SGS	V1	V2	V3	V5	V6	V7	V8		4EBP-70-PDZ	4EBP-70-SGS	IRSp53-PDZ	IRSp53-SGS	4EBP-101-PDZ	4EBP-101-SGS	L5A-PDZ	L5A-SGS	V1	V2	V3	V5	V6	V7	V8
400	0.0107759	0.00149376	0.0206358	0.00106082	-0.00148364	0.000193823	0.0296276	-4.00892e-05	0.0327294	0.0204599	0.00746348	0.0184605	0.0563598	0.0533386	0.0569464		0.0145258	0.00181427	0.0169486	0.0721811	0.00470259	0.0017984	0.198482	0.188685	0.232715	0.0206496	0.0221421	0.567299	0.210543	0.106084	0.231035
200	0.00861871	0.00544897	0.0286144	0.0012895	-0.00611217	0.000782225	0.0203592	0.00123619	0.0221951	0.0172206	0.0075895	0.0181742	0.0821204	0.0434013	0.0490915		0.00670241	0.000462395	0.0180296	0.0515889	0.00276539	-0.000861656	0.104428	0.114825	0.168129	0.0147602	0.0167808	0.266876	0.0918741	0.0773239	0.125731
100	0.00583173	-0.00150929	0.0173475	-0.000261049	-0.00327792	-0.000749117	0.0195249	0.000569139	0.0191508	0.0145888	0.00872297	0.0154159	0.0660864	0.0369177	0.0387377		0.00273854	0.00017314	0.0168833	0.0478868	0.000539016	0.00155368	0.0438554	0.0553435	0.073718	0.00524507	0.00633173	0.0938028	0.0456951	0.0431673	0.0618527
50	0.00713695	0.00134467	0.0174432	0.000885432	-0.00274169	4.30304e-05	0.0158783	-0.00162159	0.0140174	0.0119652	0.00718433	0.0136709	0.0579263	0.0344856	0.0329015		-0.00193496	0.00087967	0.0147125	0.0376546	-0.00306569	-5.89976e-06	0.0182351	0.0236473	0.0426089	0.0032056	0.00819978	0.0633634	0.0245234	0.0234991	0.029553
25	0.00390627	-0.000863412	0.0173208	0.000373	-0.00150552	-0.000408319	0.0150948	-0.000902201	0.0161539	0.00958902	0.00614113	0.0110877	0.0431365	0.0257437	0.0287066		0.00113418	-0.000371898	0.014207	0.0277446	0.0011164	0.00025166	0.00957254	0.0105543	0.0174554	0.000615462	-0.00230774	0.0283965	0.0110113	0.0106351	0.0147018
12.5	0.00286171	-2.81068e-05	0.0138994	-0.000317632	-0.00205751	-0.00143791	0.0101041	-0.000306802	0.0106385	0.00575404	0.00519038	0.00720736	0.0310491	0.0238105	0.0220988		0.00118983	-2.22323e-05	0.0119277	0.0230829	0.000725304	0.000401188	0.00458552	0.00637936	0.00797673	0.000952933	0.00186636	0.0153596	0.00409573	0.00512753	0.00710584
6.25	0.0014687	0.000195419	0.0091888	-0.000784215	-0.000102267	0.000382621	0.00490028	-5.03383e-05	0.00540579	0.00384538	0.00221872	0.0037707	0.0179949	0.0132776	0.0145963		0.000703434	-0.000218532	0.00988594	0.0202726	-0.000306045	0.000259208	0.00177468	0.00261611	0.00327554	0.00129665	0.00061741	0.00739025	0.00293235	0.00303014	0.00337197
3.125	-0.00026748	0.000146373	0.00525952	-0.00260748	-0.00152857	0.000626925	0.00255868	-0.000348509	0.0021397	0.00126744	0.00119344	0.00158086	0.00694242	0.00750123	0.00737931		0.000367967	0.001946	0.00719848	0.0113863	-0.000339893	-1.4669e-05	0.000666461	-0.00034226	0.000462624	0.00087722	-0.00019432	0.00233886	0.00130086	0.000979004	0.0016501
1.5625	-0.000225355	-0.000822548	0.00333614	-0.000621864	-0.00408976	-0.000242479	0.000717863	0.000322051	0.00159463	-0.000976959	0.000611346	0.00103748	0.00373045	0.00302201	0.00451645		-0.000574611	-0.00129764	0.00480159	0.0117244	-0.00255591	9.47129e-05	0.000695796	0.000945165	-0.00108569	0.00305382	0.000221989	0.00407654	-0.000108873	0.00165506	-0.000173565
0.78125	-0.000685799	-0.00101539	-0.000763109	-0.000622687	-0.0017049	0.00155213	0.00212097	0.00033854	0.000294076	-0.00186587	-0.000445576	0.000724197	0.00164811	0.00138789	0.00264749		-0.000260581	0.000238819	0.00287291	0.00443392	0.000178401	-0.0010073	-0.000153931	-0.000312115	-0.000302936	-0.000262158	-0.000147715	-0.00066594	0.000719557	0.000742011	-0.000203754
0.390625	-8.73782e-05	-0.000501151	-0.000123049	-0.00148209	-0.00209792	0.00153586	0.00186239	-0.00247028	-0.000895705	-0.000195538	6.22006e-05	0.000857647	0.000284531	0.00059362	0.00150862		-9.15618e-05	0.000334408	0.00193495	0.00214287	0.00197264	0.00059537	0.000169239	0.000231261	-0.0018902	-0.00254689	-0.0015531	0.00135693	9.16e-05	0.000644369	0.000223709
0	0	0	0	0	0	0	0	0	0	0	0	0	0	0	0		0	0	0	0	0	0	0	0	0	0	0	0	0	0	0
	2	18	34	50	2	18	34	50	2	18	34	50	2	18	34	50	2	18	34	50	2	18	34	50	2	18	34	50	2	18	34	50	2	18	34	50	2	18	34	50	2	18	34	50	2	18	34	50	2
	1	1	1	1	2	2	2	2	3	3	3	3	4	4	4	4	5	5	5	5	6	6	6	6	7	7	7	7	8	8	8	8	9	9	9	9	10	10	10	10	11	11	11	11	12	12	12	12	13
	4EBP-70-PDZ				4EBP-70-SGS				IRSp53-PDZ				IRSp53-SGS				4EBP-101-PDZ				4EBP-101-SGS				L5A-PDZ				L5A-SGS				V1				V2				V3				V5				V6
1	0.0314653	0.0144231	0.0088723	0.0107759	0.000651851	0.00186975	0.00332366	0.00149376	0.0386169	0.0336633	0.0267646	0.0206358	0.00401136	0.000993724	0.000165177	0.00106082	-0.000344788	0.000148538	0.000382336	-0.00148364	-0.00344724	0.000931778	0.000134678	0.000193823	0.0219879	0.0324654	0.0211488	0.0296276	-0.00176759	0.000967463	0.00200058	-4.00892e-05	0.195692	0.279669	0.0629893	0.0327294	0.0156508	0.0179906	0.00334293	0.0204599	0.00752025	0.0122169	0.0107424	0.00746348	0.0184835	0.0247311	0.0213006	0.0184605	0.0525703
2	0.0148544	0.0112237	0.00958186	0.00861871	-0.00100829	0.00225364	0.000829354	0.00544897	0.0419501	0.0224471	0.0278253	0.0286144	0.00107576	0.00143608	0.00138051	0.0012895	0.000733928	0.000336509	-0.00111169	-0.00611217	-0.000118914	0.00158242	-0.00119604	0.000782225	0.0180337	0.0216	0.0166041	0.0203592	0.00107191	0.00336055	-0.00327133	0.00123619	0.131509	0.106775	0.0365138	0.0221951	0.0146956	0.0115493	0.00311258	0.0172206	0.00765603	0.00899161	0.00819488	0.0075895	0.0179139	0.0173413	0.0147357	0.0181742	0.0522159
3	0.0230074	0.012932	0.00764956	0.00583173	-0.000670751	0.00215841	0.00227272	-0.00150929	0.0338238	0.0320685	0.0186826	0.0173475	0.00324718	-0.000401621	0.00103086	-0.000261049	-0.00089288	0.000173496	-0.0014539	-0.00327792	0.00150522	-0.000473216	-0.00312322	-0.000749117	0.02301	0.024284	0.0133682	0.0195249	0.00237025	0.00153041	0.000982451	0.000569139	0.101239	0.119077	0.0317639	0.0191508	0.0194358	0.014462	0.00392698	0.0145888	0.00608821	0.0103939	0.00851226	0.00872297	0.0173488	0.0209146	0.0155056	0.0154159	0.0429793
4	0.020953	0.0115923	0.00525155	0.00713695	-0.00482524	0.00195669	0.00217858	0.00134467	0.0325689	0.028899	0.0114471	0.0174432	0.00101444	0.00109965	-0.00047254	0.000885432	-0.00158843	0.000229428	5.41168e-06	-0.00274169	0.00073308	-0.000822437	-0.0034856	4.30304e-05	0.0193494	0.0228425	0.0137289	0.0158783	0.00124648	0.0016286	0.000223643	-0.00162159	0.0802163	0.12891	0.0341616	0.0140174	0.0162782	0.0133263	-9.36416e-05	0.0119652	0.00664394	0.0097047	0.00123217	0.00718433	0.0118875	0.0218631	0.0160689	0.0136709	0.033348
5	0.0262033	0.00604944	0.00417015	0.00390627	-0.00178952	-0.000805532	0.00197386	-0.000863412	0.0310209	0.0176719	0.0151477	0.0173208	0.000130089	-0.00180362	0.000605612	0.000373	0.00084989	0.000859708	-0.000696867	-0.00150552	0.000326027	9.14239e-06	-0.0024758	-0.000408319	0.0188208	0.0168098	0.0127287	0.0150948	0.000244738	0.000676352	-0.000599907	-0.000902201	0.0739073	0.057383	0.0249574	0.0161539	0.0136788	0.00893223	0.00413321	0.00958902	0.00578062	0.00626156	0.00704242	0.00614113	0.0104551	0.0132869	0.0105744	0.0110877	0.0301037
6	0.0128492	0.00498369	0.0034532	0.00286171	-0.00156518	0.000976254	0.00285342	-2.81068e-05	0.024093	0.0137456	0.00970571	0.0138994	-0.000287056	0.00120226	-0.00048617	-0.000317632	-0.00144298	-0.000456196	-0.000521716	-0.00205751	0.00115335	-0.000142151	-0.00304504	-0.00143791	0.0112338	0.0116505	0.00931928	0.0101041	-0.000215987	0.00182242	-6.5799e-05	-0.000306802	0.0399381	0.0467674	0.0182724	0.0106385	0.0109499	0.00835872	0.000704675	0.00575404	0.00421143	0.00614382	0.00478153	0.00519038	0.00746684	0.00984372	0.00816313	0.00720736	0.0211836
7	0.0130702	0.00145235	0.00265522	0.0014687	-0.000819952	0.000133722	0.00249914	0.000195419	0.015643	0.00792327	0.00637151	0.0091888	-0.000490436	-0.000169217	-0.000638329	-0.000784215	-5.86787e-05	-0.00051886	-0.000164357	-0.000102267	-0.000194767	-0.00117313	-0.00281577	0.000382621	0.00750193	0.0069691	0.00492851	0.00490028	0.000493876	0.00087668	-2.88227e-05	-5.03383e-05	0.0258897	0.0255581	0.00797098	0.00540579	0.00728416	0.00256642	-0.00100525	0.00384538	0.00269742	-0.00604333	0.0035002	0.00221872	0.0060862	0.00469373	0.00539927	0.0037707	0.0186276
8	0.0102715	0.001165	0.00106864	-0.00026748	-0.0010727	0.000403246	0.00185496	0.000146373	0.00914305	0.00608251	0.00420166	0.00525952	-0.000618018	-0.000104636	-0.00096598	-0.00260748	-0.00159035	-0.000578917	-0.000196238	-0.00152857	-0.00101295	-0.00151957	-0.00219629	0.000626925	0.00357425	0.00253436	0.00207677	0.00255868	0.00010153	na	-0.000548608	-0.000348509	0.0161323	0.0141425	0.00296575	0.0021397	0.00431139	0.00363736	-0.00201232	0.00126744	0.00124429	0.000251915	0.00301481	0.00119344	0.00442855	0.00295866	0.00347168	0.00158086	0.009775
9	0.00407652	0.000728603	-0.000345175	-0.000225355	-0.0029414	0.000172144	0.00207464	-0.000822548	0.00483663	0.0037475	0.000676983	0.00333614	-0.000889699	0.000978068	-0.000976433	-0.000621864	-0.00327521	-0.000557574	-0.000983264	-0.00408976	0.000692592	0.000769561	-0.00266951	-0.000242479	0.00188792	0.00278594	0.0011787	0.000717863	-5.22112e-06	na	-0.00172569	0.000322051	0.00739551	0.00988182	0.000269435	0.00159463	0.00287062	0.00158399	-0.00385493	-0.000976959	0.000142801	0.000447914	0.00286274	0.000611346	0.00250934	0.00063629	0.000898355	0.00103748	0.00491751
10	0.00382928	0.000500816	-0.00124141	-0.000685799	-0.00175926	0.000113945	0.00354774	-0.00101539	0.00196923	0.00100029	-0.000522366	-0.000763109	-0.00139976	-0.000335672	-0.00286343	-0.000622687	-7.40028e-05	-0.000700972	-0.0006084	-0.0017049	-0.000450851	-0.000455889	-0.00212974	0.00155213	0.00116225	0.00311982	0.00115607	0.00212097	0.00101523	na	7.13028e-05	0.00033854	0.00442489	0.00452874	0.00293789	0.000294076	0.00122128	0.000966109	-0.00205075	-0.00186587	-0.000480065	0.000333173	5.69822e-05	-0.000445576	0.000583068	-0.00201336	-0.00167455	0.000724197	0.00287018
11	0.00231217	-0.000501164	-0.000711514	-8.73782e-05	-0.000287583	0.000227988	-0.00098639	-0.000501151	na	0.00104275	0.000339987	-0.000123049	-0.00126933	-0.000354395	0.00330005	-0.00148209	-0.000152793	-9.39761e-05	-0.000206603	-0.00209792	0.000937098	0.000206021	-0.00186496	0.00153586	0.000438908	-5.96359e-05	4.11048e-05	0.00186239	0.000733319	0.000121962	0.000416148	-0.00247028	0.00152249	-0.00219282	0.00153579	-0.000895705	0.000727756	0.00808667	-0.00401937	-0.000195538	-0.000556211	-0.000163516	0.00451372	6.22006e-05	-0.00037308	0.000604374	-0.00474231	0.000857647	0.000981864
12	0	0	0	0	0	0	0	0	0	0	0	0	0	0	0	0	0	0	0	0	0	0	0	0	0	0	0	0	0	0	0	0	0	0	0	0	0	na	0	0	0	0	0	0	0	0	0	0	0
Normalize to 1 nM
	4EBP-70-PDZ				4EBP-70-SGS				IRSp53-PDZ				IRSp53-SGS				4EBP-101-PDZ				4EBP-101-SGS				L5A-PDZ				L5A-SGS				V1				V2				V3				V5				V6
400	1.11513	0.511155	0.314434	0.381897	0.0231016	0.0662638	0.11779	0.0529388	1.36858	1.19303	0.948537	0.731334	0.142162	0.0352176	0.00585389	0.0375954	-0.0122193	0.0052642	0.01355	-0.0525803	-0.12217	0.0330222	0.00477298	0.00686907	0.779252	1.15057	0.749513	1.05	-0.0626436	0.0342869	0.0709005	-0.00142076	6.93534	9.91148	2.23234	1.15993	0.554664	0.637585	0.118473	0.725098	0.266518	0.432967	0.38071	0.264506	0.655057	0.876471	0.754893	0.654239	1.86309
200	0.526441	0.397769	0.339581	0.305447	-0.0357339	0.0798689	0.0293923	0.193112	1.48671	0.795524	0.986128	1.0141	0.0381248	0.0508948	0.0489254	0.0456997	0.0260104	0.0119259	-0.0393985	-0.216615	-0.0042143	0.0560811	-0.0423875	0.0277221	0.639113	0.765504	0.58845	0.721532	0.0379884	0.119098	-0.115936	0.0438105	4.66067	3.7841	1.29405	0.786593	0.520812	0.409306	0.11031	0.610298	0.27133	0.318663	0.290427	0.268972	0.634869	0.614575	0.522233	0.644094	1.85053
100	0.815384	0.458312	0.2711	0.206677	-0.0237714	0.0764942	0.0805451	-0.0534893	1.19872	1.13651	0.662112	0.614794	0.11508	-0.0142334	0.0365337	-0.00925157	-0.0316437	0.00614869	-0.0515262	-0.11617	0.0533449	-0.0167708	-0.110687	-0.0265487	0.815476	0.860624	0.473769	0.691962	0.0840015	0.0542378	0.0348181	0.0201703	3.58791	4.2201	1.12571	0.678706	0.688806	0.512535	0.139172	0.517026	0.215766	0.368358	0.301674	0.309142	0.614841	0.741213	0.549518	0.546339	1.52319
50	0.742575	0.410832	0.186115	0.252933	-0.171007	0.0693449	0.0772089	0.0476552	1.15424	1.02418	0.405684	0.618188	0.0359517	0.0389717	-0.0167468	0.0313797	-0.0562941	0.00813095	0.00019179	-0.0971656	0.0259804	-0.0291472	-0.12353	0.001525	0.685742	0.80954	0.486552	0.562729	0.0441754	0.0577174	0.00792592	-0.0574691	2.84287	4.56856	1.21069	0.496777	0.576899	0.472283	-0.00331866	0.424045	0.235461	0.343935	0.0436683	0.254613	0.421292	0.774827	0.569481	0.484497	1.18185
25	0.928646	0.214392	0.14779	0.138438	-0.0634206	-0.028548	0.0699536	-0.0305993	1.09938	0.626293	0.536835	0.613849	0.00461037	-0.0639204	0.0214629	0.0132191	0.0301201	0.0304681	-0.024697	-0.0533555	0.0115544	0.000324006	-0.0877423	-0.0144708	0.667008	0.59574	0.451103	0.534959	0.0086735	0.0239699	-0.0212607	-0.031974	2.61927	2.03365	0.884491	0.572493	0.484776	0.316558	0.146481	0.339835	0.204865	0.22191	0.249583	0.217642	0.370527	0.470888	0.374758	0.392948	1.06688
12.5	0.455375	0.176622	0.122381	0.101419	-0.0554701	0.0345984	0.101125	-0.000996104	0.853857	0.487144	0.343971	0.492596	-0.0101733	0.042608	-0.0172299	-0.0112569	-0.0511392	-0.0161676	-0.0184896	-0.0729182	0.0408747	-0.00503782	-0.107916	-0.0509594	0.398126	0.412894	0.330275	0.358091	-0.0076546	0.0645865	-0.00233192	-0.0108731	1.41541	1.65744	0.647573	0.377027	0.388063	0.296233	0.0249737	0.203923	0.149253	0.217737	0.169458	0.183947	0.264625	0.348862	0.289301	0.255429	0.750747
6.25	0.463207	0.0514712	0.0941008	0.0520509	-0.0290591	0.00473911	0.0885696	0.00692564	0.554389	0.280801	0.225806	0.325651	-0.0173811	-0.00599706	-0.0226224	-0.0277926	-0.00207957	-0.0183884	-0.00582483	-0.00362433	-0.00690255	-0.0415758	-0.099791	0.0135601	0.265868	0.246985	0.174666	0.173666	0.0175029	0.0310695	-0.00102148	-0.00178399	0.917531	0.905778	0.282491	0.191581	0.258151	0.090954	-0.0356262	0.13628	0.0955967	-0.214176	0.124047	0.0786315	0.215695	0.166346	0.19135	0.133634	0.660161
3.125	0.364023	0.0412876	0.0378727	-0.0094795	-0.0380164	0.014291	0.0657396	0.00518745	0.32403	0.215564	0.148907	0.186397	-0.0219026	-0.00370829	-0.0342343	-0.092409	-0.0563621	-0.0205168	-0.00695469	-0.0541727	-0.0358991	-0.0538536	-0.0778364	0.0222182	0.126671	0.0898178	0.0736009	0.0906796	0.00359824	#VALUE!	-0.0194427	-0.0123512	0.571729	0.50121	0.105106	0.0758309	0.152795	0.128908	-0.0713167	0.0449181	0.0440976	0.00892788	0.106845	0.0422954	0.156948	0.104855	0.123036	0.0560255	0.346426
1.5625	0.144472	0.0258217	-0.012233	-0.00798659	-0.104243	0.00610079	0.0735252	-0.0291511	0.17141	0.132811	0.0239923	0.118233	-0.0315309	0.0346627	-0.0346048	-0.0220388	-0.116073	-0.0197604	-0.0348469	-0.144941	0.0245455	0.0272732	-0.0946074	-0.00859345	0.0669078	0.0987339	0.0417731	0.0254411	-0.000185036	#VALUE!	-0.0611584	0.0114135	0.262097	0.350212	0.00954878	0.0565137	0.101735	0.0561368	-0.136619	-0.0346234	0.00506087	0.0158741	0.101455	0.0216661	0.0889309	0.0225501	0.0318377	0.0367681	0.174276
0.78125	0.13571	0.0177489	-0.0439956	-0.0243047	-0.062348	0.00403822	0.125732	-0.0359855	0.0697894	0.0354503	-0.0185127	-0.0270446	-0.0496074	-0.0118962	-0.10148	-0.022068	-0.00262266	-0.0248424	-0.0215617	-0.0604217	-0.0159781	-0.0161567	-0.075478	0.0550075	0.0411901	0.110567	0.040971	0.0751671	0.0359798	#VALUE!	0.00252697	0.0119979	0.156818	0.160499	0.104119	0.010422	0.0432822	0.0342389	-0.0726785	-0.0661264	-0.0170135	0.0118077	0.00201945	-0.0157912	0.0206639	-0.0713535	-0.0593459	0.0256655	0.101719
0.390625	0.0819433	-0.0177612	-0.0252161	-0.00309668	-0.0101919	0.0080799	-0.0349577	-0.0177608	#VALUE!	0.036955	0.0120491	-0.00436086	-0.044985	-0.0125598	0.116954	-0.0525251	-0.00541499	-0.00333051	-0.007322	-0.0743501	0.0332107	0.00730138	-0.0660941	0.0544307	0.0155549	-0.0021135	0.00145676	0.066003	0.0259888	0.00432234	0.0147483	-0.0875468	0.053957	-0.0777136	0.0544284	-0.0317438	0.0257917	0.286592	-0.142446	-0.00692988	-0.0197121	-0.005795	0.159966	0.00220439	-0.0132219	0.021419	-0.168067	0.030395	0.0347973
0	0	0	0	0	0	0	0	0	0	0	0	0	0	0	0	0	0	0	0	0	0	0	0	0	0	0	0	0	0	0	0	0	0	0	0	0	0	#VALUE!	0	0	0	0	0	0	0	0	0	0	0
PP1-Neurabin
	4EBP-70-PDZ	4EBP-70-SGS	IRSp53-PDZ	IRSp53-SGS	4EBP-101-PDZ	4EBP-101-SGS	L5A-PDZ	L5A-SGS	V1	V2	V3	V5	V6	V7	V8
Catalytic efficiency - Michaelis-Menten
Best-fit values
CE	0.004761	3.315e-05	0.009131	3.101e-05	-0.05	-0.003724	0.006485	6.54e-05	0.0147	0.003363	0.002203	0.004524	0.01454	0.01442	0.01659
Km	10.92	Unstable	13.3	Unstable	0.08306	0.7262	13.63	77.43	23.14	16.58	16.73	17.44	22.12	10.65	20.61
Std. Error
CE	0.002231	1.533e-05	0.002009	3.863e-05	0.2107	0.009333	0.0008438	0.0001077	0.006103	0.001315	0.0006282	0.0005892	0.003987	0.002403	0.007669
Km	6.24	Unstable	3.625	Unstable	0.361	1.985	2.201	209.6	12.6	8.196	6.038	2.886	7.908	2.16	12.32
95% CI (profile likelihood)
CE	0.001991 to 0.01239	2.217e-006 to 6.409e-005	0.005839 to 0.01446	7.650e-006 to 4.768e-005	??? to 0.01071	??? to 0.0007684	0.005089 to 0.008306	2.919e-006 to ???	0.006665 to 0.03437	0.001637 to 0.007164	0.001289 to 0.003838	0.003532 to 0.005826	0.008728 to 0.02490	0.01044 to 0.02013	0.006940 to 0.04379
Km	3.454 to 32.37	(Very wide)	7.570 to 23.36	(Very wide)	-0.2349 to 2.809	-0.2649 to 30.77	10.05 to 18.42	-62.71 to ???	7.850 to 69.23	6.496 to 42.25	8.389 to 33.42	12.69 to 23.93	11.14 to 43.78	7.121 to 15.83	6.086 to 67.76
Goodness of Fit
Degrees of Freedom	42	42	41	42	42	42	42	39	42	41	42	42	42	42	42
R squared	0.4902	0.07837	0.8113	0.1547	0.04729	0.03285	0.9255	0.08515	0.55	0.5889	0.7182	0.9294	0.7397	0.8815	0.4916
Sum of Squares	0.01569	0.002105	0.01772	0.0008843	0.001224	0.001236	0.003348	0.0008252	0.4427	0.01125	0.002674	0.002529	0.175	0.01739	0.5731
Sy.x	0.01933	0.00708	0.02079	0.004589	0.005398	0.005424	0.008929	0.0046	0.1027	0.01657	0.007979	0.00776	0.06454	0.02035	0.1168
Number of points
# of X values	44	44	44	44	44	44	44	44	44	44	44	44	44	44	44
# Y values analyzed	44	44	43	44	44	44	44	41	44	43	44	44	44	44	44
PP1-Phactr1
	4EBP-70-PDZ	4EBP-70-SGS	IRSp53-PDZ	IRSp53-SGS	4EBP-101-PDZ	4EBP-101-SGS	L5A-PDZ	L5A-SGS	V1	V2	V3	V5	V6	V7	V8
Catalytic efficiency - Michaelis-Menten
Best-fit values
CE	2.314e-05	6.267e-06	0.002397	0.0022	7.347e-06	5.321e-06	0.0003236	0.0003173	0.0006453	3.123e-05	0.000171	0.000925	0.0003321	0.0004013	0.0005725
Km	Unstable	Unstable	8.847	12.29	Unstable	152.8	Unstable	Unstable	1269	Unstable	78.48	Unstable	1825	901.9	554.2
Std. Error
CE	2.528e-06	2.388e-06	0.0003846	0.0005276	2.018e-06	2.319e-05	1.152e-05	6.527e-05	0.0001255	1.13e-05	5.221e-05	6.605e-05	5.401e-05	4.911e-05	4.663e-05
Km	Unstable	Unstable	1.705	3.628	Unstable	1380	Unstable	Unstable	2048	Unstable	39.53	Unstable	3388	690.3	194.6
95% CI (profile likelihood)
CE	1.804e-005 to 2.824e-005	1.448e-006 to 1.109e-005	0.001722 to 0.003366	0.001306 to 0.003824	3.272e-006 to 1.142e-005	-4.073e-006 to 8.712e-006	0.0003004 to 0.0003468	0.0002782 to 0.0003531	0.0005086 to ???	2.408e-005 to 3.681e-005	8.363e-005 to 0.0003926	0.0007917 to 0.001058	0.0002763 to ???	0.0003210 to 0.0005142	0.0004869 to 0.0006716
Km	(Very wide)	(Very wide)	5.893 to 13.20	6.266 to 23.72	(Very wide)	???	(Very wide)	(Very wide)	-788.4 to ???	(Very wide)	22.76 to 367.1	(Very wide)	-857.2 to ???	318.2 to ???	314.1 to 1492
Goodness of Fit
Degrees of Freedom	42	42	42	42	41	42	42	42	42	42	42	42	42	42	42
R squared	0.6342	0.1324	0.8838	0.767	0.2261	0.009584	0.9368	0.8343	0.8483	0.6019	0.55	0.7774	0.887	0.9304	0.9683
Sum of Squares	5.724e-05	5.111e-05	0.0003167	0.001088	3.394e-05	9.35e-05	0.001188	0.003087	0.00913	8.926e-05	0.0002138	0.03909	0.001811	0.00128	0.0009641
Sy.x	0.001167	0.001103	0.002746	0.005089	0.0009098	0.001492	0.005319	0.008573	0.01474	0.001458	0.002256	0.03051	0.006567	0.005521	0.004791
Number of points
# of X values	44	44	44	44	44	44	44	44	44	44	44	44	44	44	44
# Y values analyzed	44	44	44	44	43	44	44	44	44	44	44	44	44	44	44
[truncated: 75 more columns]
