# Supplementary material for: PDZ-directed substrate recruitment is the primary determinant of specific 4E-BP1 dephosphorylation by PP1-Neurabin
Source: eLife journal article supplement (doi:10.7554/elife.103403), 2024-11-20
Supplement: fig5-data1 [file 231211 data analysis.xlsx]

## Sheet: Sheet1
rep1	PP1-Neb 1 nM																PP1-Ph1 2.5 nM
	V1	V2	V3	V4	V5	V6	V7	P1	P2	P3	P4	P5	P6	P7	P8		V1	V2	V3	V4	V5	V6	V7	P1	P2	P3	P4	P5	P6	P7	P8
400	0.213258	0.0342112	0.0236386	0.0319846	0.0447407	0.159105	0.0795772	0.055139	0.0215393	0.0256089	0.0247784	0.0462847	0.0566103	0.0102612	0.0119446		0.347869	0.0555471	0.0687263	0.0643524	0.409189	0.299781	na	0.0999742	0.0105313	na	0.396033	0.156237	na	0.016478	0.0136506
200	0.261596	0.0339574	0.0261571	0.0272783	0.0430854	0.195353	0.107309	0.0410639	-0.00521378	0.130573	0.0341868	0.086373	0.0269438	0.0128247	0.0169439		0.381909	0.0348244	0.051953	0.0408666	0.426451	0.219689	0.559866	0.0647145	-0.00702913	na	0.453281	0.319996	0.334414	0.0219123	na
100	0.192877	0.0351375	0.0229332	0.0268265	0.0364298	0.153597	0.073861	0.0395106	0.00471717	0.0546049	0.0299146	0.0947475	0.00470675	0.0126893	0.0076684		0.239196	0.032069	0.0461018	0.0250273	0.257569	0.124619	0.232451	0.0419923	-0.00536308	0.48134	0.544225	0.0761821	0.189771	0.00134161	na
50	0.236411	0.0352363	0.023736	0.0249894	0.0385815	0.148026	0.100448	0.0348641	0.00606194	0.108488	0.0113755	0.0851411	0.0163967	0.0096577	0.00846473		0.221809	0.0229323	0.0317911	0.0182799	0.186164	0.114001	0.175408	0.0207841	-0.0035502	0.435483	0.324051	0.114326	0.119453	na	na
25	0.165204	0.0338481	0.0223523	0.0242424	0.0343498	0.136294	0.0867677	0.0283022	-0.000207842	0.0865069	0.0111549	0.0585461	0.0151728	0.00867382	0.00605284		0.145571	0.0172209	0.0211661	0.0121274	0.131639	0.0755046	0.0386649	0.0140859	-0.00318405	0.409434	0.25186	0.058387	0.0217539	na	na
12.5	0.163229	0.0251377	0.019077	0.0256725	0.031866	0.127229	0.0999233	0.0286601	0.0037231	0.0759916	0.0101498	0.0556992	0.0085495	0.00471479	0.00313856		0.075793	0.0137938	0.0190668	0.010063	0.0800937	0.05314	0.0243225	0.00976778	0.00273192	0.336646	0.208652	0.0383029	0.00836681	na	na
6.25	0.117292	0.0210057	0.0154806	0.0205443	0.0255304	0.112839	0.0634573	0.0219684	-0.00294693	0.0456334	0.00494129	0.0398831	0.00220152	0.00440371	0.0042464		0.040924	0.0101787	0.0158033	0.0032993	0.0418733	0.0312218	0.0274519	0.00709322	0.00177667	0.200541	0.140426	0.0234963	na	na	na
3.125	0.0905733	0.0131055	0.0117271	0.016693	0.0188805	0.0868648	0.0464863	0.0141775	-0.0054279	0.0350226	0.0053248	0.0283065	0.00745403	0.00407214	0.00642908		0.0312916	0.00987999	0.0195806	0.00790647	0.0282354	0.0247046	0.0157191	0.00204953	-0.000497358	0.129019	0.0699333	0.0131166	na	na	na
1.5625	0.0879935	0.00580292	0.00762895	0.0163773	0.0137289	0.0533228	0.0280452	0.0109375	-0.00478825	0.0278913	0.00461655	0.0265452	0.00316041	0.000827879	-0.000136854		0.0265104	0.0089436	0.0109384	0.00398877	0.0185888	0.0197335	0.0177738	0.00262852	-0.00218787	0.0678546	0.038358	0.00385543	na	na	na
0.78125	0.0299348	0.00442927	0.00551678	0.0158115	0.0119395	0.0405054	0.0128066	0.00841715	-0.0010472	0.0139449	0.00887161	0.0141166	0.00416902	0.00252888	0.00172791		0.00987289	0.0118564	0.0124284	0.00196381	0.0164055	0.0189816	0.00919533	0.00269756	0.000498737	0.0343721	0.0191134	na	na	na	na
0.390625	0.0154042	0.00215588	0.00780558	0.015494	0.00521415	0.0294877	0.00594533	0.00670901	-0.000784218	0.00765963	0.00818284	0.00846429	-0.00270075	-0.00159946	0.00111882		0.00565665	0.00863499	0.00535007	0.00440649	0.00327453	0.0137004	-0.00200579	0.00237634	-0.00832685	0.0170258	na	na	na	na	na
0	0	0	0	0	0	0	0	0	0	0	0	0	0	0	0		0	0	0	0	0	0	0	0	0	0	0	0	na	na	na
rep2	PP1-Neb 1 nM																PP1-Ph1 2.5 nM
	V1	V2	V3	V4	V5	V6	V7	P1	P2	P3	P4	P5	P6	P7	P8		V1	V2	V3	V4	V5	V6	V7	P1	P2	P3	P4	P5	P6	P7	P8
400	0.228212	0.0241748	0.021921	0.0177977	0.0441697	0.290989	0.0808879	0.043401	0.00819205	0.109131	0.0261076	0.0720032	0.0550586	0.00917297	0.00393308		0.507755	0.0463767	0.0528382	0.0666354	0.445229	0.37425	0.451656	0.101878	0.00920222	0.23692	0.349458	0.282364	na	0.00257289	0.00584068
200	0.309336	0.0210946	0.0234912	0.0196786	0.0430565	0.251032	0.0604999	0.0528832	0.000748802	0.0955008	0.0133572	0.0237183	-0.00465928	0.00629528	0.00168025		0.416108	0.030376	0.035684	0.0333552	0.446836	0.350126	0.284374	0.0631291	-0.00282392	0.255055	na	0.121441	0.173512	0.00750166	0.00282088
100	0.226992	0.0250343	0.0183852	0.012402	0.0353039	0.208273	0.0652445	0.0379936	0.0029781	0.0803894	0.00726197	0.053154	0.00598982	0.00369263	0.00371204		0.286348	0.0206903	0.0183105	0.00930886	0.18663	0.112037	0.136611	0.0393886	0.00134994	0.353958	0.262221	0.167215	0.106773	0.00449995	0.00704833
50	0.215865	0.0234412	0.0268362	0.0178581	0.0347591	0.176909	0.0605892	0.0413372	0.00952193	0.0731495	0.0124505	0.0624845	0.00301799	0.00391261	0.00197071		0.257847	0.0196763	0.0118926	0.0054421	0.136139	0.0947523	0.0826563	0.0384021	-0.00111655	0.154673	0.343857	0.0831151	0.0683708	0.00766633	0.00619199
25	0.144853	0.0294472	0.0230126	0.015484	0.041702	0.182568	0.0624872	0.0306192	0.00815578	0.06696	0.00547257	0.0462223	6.27781e-05	0.00418785	0.000974092		0.107755	0.00850615	0.00996718	0.000898982	0.0863743	0.0512829	0.0678469	0.0289351	-0.000836685	0.265587	0.228434	0.0574928	0.0391803	0.00666602	0.00606755
12.5	0.131278	0.0218735	0.0181675	0.00721835	0.0276535	0.173496	0.062662	0.0307155	0.00686491	0.0513596	0.00138419	0.0358753	-0.00296779	0.00115897	-0.00232949		0.0712797	0.00708273	0.00262356	-0.000208835	0.0575783	0.0358565	0.0457472	0.0214557	-0.00119539	0.172315	0.12069	0.0250264	0.0160635	-0.000915685	0.00441527
6.25	0.088011	0.018912	0.0128984	0.00483477	0.0175192	0.0957046	0.041424	0.0172154	0.00173403	0.0340032	-0.000885999	0.0200333	0.00148124	0.00116638	0.00178393		0.0329498	0.0125156	0.0044329	-0.00115634	0.0390071	0.0221281	0.0285227	0.0193846	0.00480037	0.113504	0.0745125	0.0199674	0.0210343	0.00558302	0.00317109
3.125	0.0808557	0.0189056	0.011109	0.0100763	0.0208257	0.0741639	0.0407486	0.0146013	0.00749758	0.0229192	0.00344989	0.0173199	0.00298888	0.000175464	0.00171464		0.0200972	0.00479826	-0.00276847	-0.00624512	0.0178146	0.0094776	0.0256293	0.0169021	0.00537426	0.100194	0.0520953	0.00847981	0.0136919	0.00514941	0.00804384
1.5625	0.0687006	0.0127277	0.00180316	0.00254215	0.00649927	0.0433776	0.0331853	0.00915266	0.00690778	0.0159307	-0.0019823	0.00717293	-0.00173895	-0.00158978	0.00229473		0.0153458	0.00758513	0.00421599	-0.00268044	0.00907593	0.00741712	0.0163633	0.0201225	0.0072879	0.0462011	0.0333119	0.00493886	0.00309678	0.00135622	0.00330194
0.78125	0.028512	0.00692516	0.00629575	0.00385471	0.00601904	0.0255331	0.0101827	0.00427245	0.00566103	0.00874552	0.000631053	0.00603825	-0.00162771	0.000127025	0.000508821		0.00237068	0.01317	0.00750578	-0.00243765	0.00615384	0.00359066	-0.0074734	0.00528607	0.00267175	0.0220797	0.011062	0.00100055	-0.00100086	0.000932846	0.00412173
0.390625	0.0109942	0.00330754	0.00367456	0.00147584	na	0.0119408	na	0.005108	0.00340095	6.55328e-06	-0.00167215	0.0010971	-0.00182688	0.00068331	-0.00211279		0.0077809	0.00538266	0.00139715	-0.0057878	-0.00209665	-0.00660788	0.00123173	0.000165118	0.00863283	0.00593262	0.0057778	0.000299301	-0.000817596	-9.55048e-06	0.00400347
0	na	0	0	0	0	0	0	0	0	0	0	0	0	0	0		0	0	0	0	0	0	0	0	0	0	0	0	0	0	0
rep3	PP1-Neb 1 nM																PP1-Ph1 2.5 nM
	V1	V2	V3	V4	V5	V6	V7	P1	P2	P3	P4	P5	P6	P7	P8		V1	V2	V3	V4	V5	V6	V7	P1	P2	P3	P4	P5	P6	P7	P8
400	0.425363	0.0291293	0.0250641	0.0193156	0.0412897	0.21818	na	0.123582	0.00251059	0.0744323	0.0292101	0.0452474	-0.00354562	0.00215774	-0.00068541		na	0.0473073	0.0727273	0.043368	na	na	0.241222	0.0882491	0.0120794	0.223357	0.310359	0.100379	0.252014	0.00819101	0.00562718
200	0.377579	0.0373885	0.0240832	0.0184612	0.0412158	0.144252	0.0638597	0.0446246	-0.00222145	0.101597	0.00794897	0.0313368	-0.00748886	0.00165948	0.000722054		na	0.027731	0.0119867	0.00835521	0.528363	0.283378	0.288494	0.0456816	0.000229752	0.495492	0.44137	na	0.128766	0.00825031	0.00626228
100	0.345452	0.0307633	0.0219724	0.0182971	0.0370629	0.190259	0.0947714	0.0484502	-0.00127656	0.0909071	0.00497028	0.0637412	-0.002258	0.000905822	0.000900244		0.341424	0.0105967	0.0234033	0.0115048	0.266803	0.0900176	0.164944	0.0265453	0.000332151	0.33025	0.321589	0.240389	0.0801252	0.00807362	0.00377526
50	0.512187	0.0316571	0.0228798	0.0155823	0.0302608	0.0838635	0.067316	0.0254341	-0.00324146	0.12338	0.00601979	0.0441378	0.000805213	0.00166776	-0.0025405		0.353865	0.0119358	0.0143912	0.0082462	0.138597	0.0813387	0.0963722	0.0129833	-0.00418541	0.380032	0.252907	0.119623	0.0503461	0.0078559	0.00764286
25	0.204366	0.0287708	0.0181024	0.0112354	0.0278368	0.157327	0.054943	0.0260231	0.000621841	0.0641884	0.00728285	0.0286086	0.00268006	0.00251151	0.00134865		0.15757	0.00776879	0.0127991	0.00367745	0.0931014	0.0348208	0.073629	0.00685359	-0.00122114	0.204126	0.307995	0.0685759	0.0318228	0.00793846	0.00501029
12.5	0.221162	0.024148	0.0162927	0.00997488	0.0218172	0.135052	0.0469468	0.0184038	0.000959272	0.0520985	0.00437748	0.0260674	0.00246378	0.00156683	-0.000974342		0.0809873	0.00648911	0.013591	0.00787853	0.0648948	0.0265445	0.0402071	0.00301457	0.000717042	0.149619	0.171778	0.0329883	0.0225903	0.00680108	0.00460539
6.25	0.140977	0.0166576	0.0155237	0.00804709	0.0207544	0.0874546	0.0472766	0.0169727	-7.4248e-05	0.0381476	0.00563986	0.0229941	0.00396179	0.000960061	-3.14922e-05		0.0333805	0.000453673	0.00454452	0.00533624	0.0311224	-0.00103142	0.0256666	0.00353196	-0.00182106	0.0919465	0.0813914	0.0178122	0.0139513	0.00608796	0.00137837
3.125	0.103677	0.00857126	0.00761583	0.00744372	0.0120788	0.0526114	0.0328288	0.0100801	-0.00144126	0.0257034	0.00664223	0.0125592	0.00354008	0.00361737	0.000750713		0.013392	0.00234345	-0.000301532	0.00350323	0.0175393	-0.00103945	0.0161132	-0.00326747	-0.00221332	0.0453804	0.0404929	0.0110357	0.00616019	0.00685315	0.00240527
1.5625	0.0584559	0.00564778	0.00550875	0.00277082	0.00780022	0.0334009	0.0247046	0.00720834	0.000541748	0.0129166	0.00385925	0.0087299	0.00392611	0.00334424	0.000324693		0.00922277	0.00160512	0.00262274	0.00127872	0.00864205	0.00144827	0.0134385	-0.0026314	-0.00614658	0.035638	0.017008	0.00604475	0.0012905	0.00384895	0.00268287
0.78125	0.034465	-0.00456626	0.00355921	0.00105049	0.00540527	0.0169343	0.0185451	0.00729166	-0.00215648	0.0089073	0.00354984	0.00694285	0.00427342	0.00256434	0.000230146		0.00679087	0.00173583	-0.00322602	-0.00223911	0.00596276	-0.00366865	0.00960979	0.00137672	-0.00274789	0.0173595	0.0114374	0.00169758	-0.000218837	0.00352659	0.00185718
0.390625	0.0137951	0.00209234	0.0046242	0.00102682	0.00388731	0.0137682	0.00995888	0.00140545	-0.00289168	0.00244907	0.00118455	0.00123248	0.00381319	0.000568788	-0.000360871		0.00309795	0.0021648	0.00112673	0.000544317	0.00610857	na	0.0102346	-0.000227815	-0.00350938	0.0108262	0.0102506	0.00234524	0.000269345	0.00104905	0.00065719
0	0	0	0	0	0	0	0	0	0	0	0	0	0	0	0		0	0	0	na	na	0	0	0	0	0	0	0	0	0	0
rep4	PP1-Neb 1 nM																PP1-Ph1 2.5 nM
	V1	V2	V3	V4	V5	V6	V7	P1	P2	P3	P4	P5	P6	P7	P8		V1	V2	V3	V4	V5	V6	V7	P1	P2	P3	P4	P5	P6	P7	P8
400	0.2414	0.0197335	0.0185681	0.0180682	0.0342859	0.285822	0.0721986	0.0348519	0.00676416	0.0550459	0.0177165	0.0502015	-0.000254058	-0.00557076	0.00776649		0.342714	0.0663047	0.0714166	0.07412	na	0.277326	na	0.108725	0.00616797	na	0.408144	na	na	0.0168452	0.00841033
200	0.294823	0.0234527	0.0203061	0.0171207	0.0302887	0.170237	0.0819335	0.0385809	0.000734556	0.0997108	0.0104336	0.0832849	-0.0270556	-0.00281205	0.00751253		0.238334	0.0343072	0.053871	0.0428162	0.24439	0.236825	0.00302861	0.0672544	-0.0229308	na	0.417492	0.344822	0.0643006	0.0151486	0.00952756
100	0.186304	0.0211706	0.0162813	0.0151073	0.0266826	0.195878	0.0565331	0.0323914	0.00268	0.0706014	0.0154499	0.062693	0.0109621	-0.00237345	0.00267414		0.224406	0.0245655	0.0378567	0.0205953	0.203406	0.0920971	0.163394	0.0453571	-0.0166348	na	0.30125	0.227394	0.115965	0.00723284	0.0120123
50	0.231804	0.022613	0.0166164	0.0121932	0.0317367	0.155054	0.0849928	0.025809	-0.00164029	0.0837528	-0.000396889	0.0506417	-0.00324119	-0.00656496	0.00631142		0.160652	0.0163364	0.0228593	0.0104817	0.108176	0.0544531	0.0761888	0.0343164	-0.0120015	0.278002	0.266929	0.0932967	0.0528021	0.00722091	0.0115723
25	0.170488	0.0203927	0.0157437	0.00921112	0.0269871	0.133451	0.0648403	0.0263241	0.000495487	0.0604537	-0.00226298	0.0347453	0.00343046	-0.00351136	0.00207325		0.0876608	0.0119154	0.0163354	0.00678798	0.0808809	0.0368326	0.0586011	0.0223023	-0.0168439	0.248317	0.188839	0.0599557	0.0363603	0.00589838	0.00625499
12.5	0.143264	0.0153859	0.0124181	0.00841299	0.0235162	0.112053	0.0647525	0.0165605	0.000864747	0.0506962	-0.00927724	0.0288199	0.00436123	-0.00580315	0.00392141		0.0501956	0.0105815	0.0102435	0.00512239	0.0396253	0.0240614	0.034554	0.02236	-0.0168159	0.158989	0.1209	0.0322662	0.0232741	0.00274066	0.00630492
6.25	0.0993702	0.00858855	0.0113921	0.00615084	0.0180873	0.074633	0.0462403	0.0136733	-0.00145899	0.0345207	-0.00202777	0.022746	-0.000541474	-0.00336921	0.00243593		0.0274005	0.00695619	0.004849	0.00289986	0.0244603	0.0139531	0.0221945	0.0149284	-0.0175062	0.102376	0.0646694	0.0164153	0.00993786	0.00131211	0.00642874
3.125	0.0797467	-0.00451438	0.00672756	0.00219249	0.0114353	0.0523028	0.0327365	0.0104958	0.00021777	0.0198516	-0.00116838	0.013423	0.000336406	-0.00116482	0.00171144		0.0198721	0.00578595	0.00390532	0.000758374	0.0139039	0.00954021	0.0215804	0.0123863	-0.0192373	0.0541958	0.0338104	0.00958537	0.00388583	0.00141548	0.00328991
1.5625	0.0459688	-0.00070778	0.00361102	0.00167105	0.00809206	0.0299833	0.0264701	0.00706379	-0.000770809	0.0110332	-0.00256899	0.00736728	-0.00111518	-0.0047862	0.000380448		0.00618698	0.00675607	0.0035933	0.00262933	0.00830129	-0.00813598	0.0111032	0.0079306	-0.0233366	0.0288164	0.0176537	0.00339819	-0.00148138	-0.00229976	0.00363861
0.78125	0.0253274	-0.00261309	0.00271666	0.00105227	0.0028288	0.0192927	0.0153045	0.00185917	0.0001283	na	-0.00720442	0.00141954	-0.00120947	-0.00324533	0.000222499		-0.000739253	0.00493935	0.00313684	0.0016555	0.000329259	0.00319533	0.00899034	0.0118521	-0.0206477	0.0165987	0.0073308	0.000112114	-0.00260279	-0.00215132	0.00334019
0.390625	0.0170394	-0.00287069	0.00163556	0.000333529	-0.000176362	0.0109725	0.00799139	na	0.000493661	na	-0.00190509	0.00342948	-0.00145183	-0.00274026	0.00054062		0.00214918	0.00137831	0.00218332	0.00133189	0.00237684	0.00157656	0.00912301	0.00727114	-0.0231757	0.00815129	0.00562365	0.0011006	-0.00237536	0.00122046	0.00113112
0	0	0	0	0	0	0	0	na	0	na	0	0	0	0	0		0	0	0	0	0	0	0	0	0	0	0	0	0	0	0
	2	18	34	50	2	18	34	50	2	18	34	50	2	18	34	50	2	18	34	50	2	18	34	50	2	18	34	50	2	18	34	50	2	18	34	50	2	18	34	50	2	18	34	50	2	18	34	50	2
	1	1	1	1	2	2	2	2	3	3	3	3	4	4	4	4	5	5	5	5	6	6	6	6	7	7	7	7	8	8	8	8	9	9	9	9	10	10	10	10	11	11	11	11	12	12	12	12	13
	PP1-Neurabin
	V1				V2				V3				V4				V5				V6				V7				4EBP-FEMDI				4EBP-SGS				IRSP53-FEMDI				IRSP53-SGS				L5A-FEMDI				L5A-SGS
1	0.213258	0.228212	0.425363	0.2414	0.0342112	0.0241748	0.0291293	0.0197335	0.0236386	0.021921	0.0250641	0.0185681	0.0319846	0.0177977	0.0193156	0.0180682	0.0447407	0.0441697	0.0412897	0.0342859	0.159105	0.290989	0.21818	0.285822	0.0795772	0.0808879	na	0.0721986	0.055139	0.043401	0.123582	0.0348519	0.0215393	0.00819205	0.00251059	0.00676416	0.0256089	0.109131	0.0744323	0.0550459	0.0247784	0.0261076	0.0292101	0.0177165	0.0462847	0.0720032	0.0452474	0.0502015	0.0566103
2	0.261596	0.309336	0.377579	0.294823	0.0339574	0.0210946	0.0373885	0.0234527	0.0261571	0.0234912	0.0240832	0.0203061	0.0272783	0.0196786	0.0184612	0.0171207	0.0430854	0.0430565	0.0412158	0.0302887	0.195353	0.251032	0.144252	0.170237	0.107309	0.0604999	0.0638597	0.0819335	0.0410639	0.0528832	0.0446246	0.0385809	-0.00521378	0.000748802	-0.00222145	0.000734556	0.130573	0.0955008	0.101597	0.0997108	0.0341868	0.0133572	0.00794897	0.0104336	0.086373	0.0237183	0.0313368	0.0832849	0.0269438
3	0.192877	0.226992	0.345452	0.186304	0.0351375	0.0250343	0.0307633	0.0211706	0.0229332	0.0183852	0.0219724	0.0162813	0.0268265	0.012402	0.0182971	0.0151073	0.0364298	0.0353039	0.0370629	0.0266826	0.153597	0.208273	0.190259	0.195878	0.073861	0.0652445	0.0947714	0.0565331	0.0395106	0.0379936	0.0484502	0.0323914	0.00471717	0.0029781	-0.00127656	0.00268	0.0546049	0.0803894	0.0909071	0.0706014	0.0299146	0.00726197	0.00497028	0.0154499	0.0947475	0.053154	0.0637412	0.062693	0.00470675
4	0.236411	0.215865	0.512187	0.231804	0.0352363	0.0234412	0.0316571	0.022613	0.023736	0.0268362	0.0228798	0.0166164	0.0249894	0.0178581	0.0155823	0.0121932	0.0385815	0.0347591	0.0302608	0.0317367	0.148026	0.176909	0.0838635	0.155054	0.100448	0.0605892	0.067316	0.0849928	0.0348641	0.0413372	0.0254341	0.025809	0.00606194	0.00952193	-0.00324146	-0.00164029	0.108488	0.0731495	0.12338	0.0837528	0.0113755	0.0124505	0.00601979	-0.000396889	0.0851411	0.0624845	0.0441378	0.0506417	0.0163967
5	0.165204	0.144853	0.204366	0.170488	0.0338481	0.0294472	0.0287708	0.0203927	0.0223523	0.0230126	0.0181024	0.0157437	0.0242424	0.015484	0.0112354	0.00921112	0.0343498	0.041702	0.0278368	0.0269871	0.136294	0.182568	0.157327	0.133451	0.0867677	0.0624872	0.054943	0.0648403	0.0283022	0.0306192	0.0260231	0.0263241	-0.000207842	0.00815578	0.000621841	0.000495487	0.0865069	0.06696	0.0641884	0.0604537	0.0111549	0.00547257	0.00728285	-0.00226298	0.0585461	0.0462223	0.0286086	0.0347453	0.0151728
6	0.163229	0.131278	0.221162	0.143264	0.0251377	0.0218735	0.024148	0.0153859	0.019077	0.0181675	0.0162927	0.0124181	0.0256725	0.00721835	0.00997488	0.00841299	0.031866	0.0276535	0.0218172	0.0235162	0.127229	0.173496	0.135052	0.112053	0.0999233	0.062662	0.0469468	0.0647525	0.0286601	0.0307155	0.0184038	0.0165605	0.0037231	0.00686491	0.000959272	0.000864747	0.0759916	0.0513596	0.0520985	0.0506962	0.0101498	0.00138419	0.00437748	-0.00927724	0.0556992	0.0358753	0.0260674	0.0288199	0.0085495
7	0.117292	0.088011	0.140977	0.0993702	0.0210057	0.018912	0.0166576	0.00858855	0.0154806	0.0128984	0.0155237	0.0113921	0.0205443	0.00483477	0.00804709	0.00615084	0.0255304	0.0175192	0.0207544	0.0180873	0.112839	0.0957046	0.0874546	0.074633	0.0634573	0.041424	0.0472766	0.0462403	0.0219684	0.0172154	0.0169727	0.0136733	-0.00294693	0.00173403	-7.4248e-05	-0.00145899	0.0456334	0.0340032	0.0381476	0.0345207	0.00494129	-0.000885999	0.00563986	-0.00202777	0.0398831	0.0200333	0.0229941	0.022746	0.00220152
8	0.0905733	0.0808557	0.103677	0.0797467	0.0131055	0.0189056	0.00857126	-0.00451438	0.0117271	0.011109	0.00761583	0.00672756	0.016693	0.0100763	0.00744372	0.00219249	0.0188805	0.0208257	0.0120788	0.0114353	0.0868648	0.0741639	0.0526114	0.0523028	0.0464863	0.0407486	0.0328288	0.0327365	0.0141775	0.0146013	0.0100801	0.0104958	-0.0054279	0.00749758	-0.00144126	0.00021777	0.0350226	0.0229192	0.0257034	0.0198516	0.0053248	0.00344989	0.00664223	-0.00116838	0.0283065	0.0173199	0.0125592	0.013423	0.00745403
9	0.0879935	0.0687006	0.0584559	0.0459688	0.00580292	0.0127277	0.00564778	-0.00070778	0.00762895	0.00180316	0.00550875	0.00361102	0.0163773	0.00254215	0.00277082	0.00167105	0.0137289	0.00649927	0.00780022	0.00809206	0.0533228	0.0433776	0.0334009	0.0299833	0.0280452	0.0331853	0.0247046	0.0264701	0.0109375	0.00915266	0.00720834	0.00706379	-0.00478825	0.00690778	0.000541748	-0.000770809	0.0278913	0.0159307	0.0129166	0.0110332	0.00461655	-0.0019823	0.00385925	-0.00256899	0.0265452	0.00717293	0.0087299	0.00736728	0.00316041
10	0.0299348	0.028512	0.034465	0.0253274	0.00442927	0.00692516	-0.00456626	-0.00261309	0.00551678	0.00629575	0.00355921	0.00271666	0.0158115	0.00385471	0.00105049	0.00105227	0.0119395	0.00601904	0.00540527	0.0028288	0.0405054	0.0255331	0.0169343	0.0192927	0.0128066	0.0101827	0.0185451	0.0153045	0.00841715	0.00427245	0.00729166	0.00185917	-0.0010472	0.00566103	-0.00215648	0.0001283	0.0139449	0.00874552	0.0089073	na	0.00887161	0.000631053	0.00354984	-0.00720442	0.0141166	0.00603825	0.00694285	0.00141954	0.00416902
11	0.0154042	0.0109942	0.0137951	0.0170394	0.00215588	0.00330754	0.00209234	-0.00287069	0.00780558	0.00367456	0.0046242	0.00163556	0.015494	0.00147584	0.00102682	0.000333529	0.00521415	na	0.00388731	-0.000176362	0.0294877	0.0119408	0.0137682	0.0109725	0.00594533	na	0.00995888	0.00799139	0.00670901	0.005108	0.00140545	na	-0.000784218	0.00340095	-0.00289168	0.000493661	0.00765963	6.55328e-06	0.00244907	na	0.00818284	-0.00167215	0.00118455	-0.00190509	0.00846429	0.0010971	0.00123248	0.00342948	-0.00270075
12	0	na	0	0	0	0	0	0	0	0	0	0	0	0	0	0	0	0	0	0	0	0	0	0	0	0	0	0	0	0	0	na	0	0	0	0	0	0	0	na	0	0	0	0	0	0	0	0	0
Normaalized to 1nM
	V1				V2				V3				V4				V5				V6				V7				4EBP-FEMDI				4EBP-SGS				IRSP53-FEMDI				IRSP53-SGS				L5A-FEMDI				L5A-SGS
400	0.213258	0.228212	0.425363	0.2414	0.0342112	0.0241748	0.0291293	0.0197335	0.0236386	0.021921	0.0250641	0.0185681	0.0319846	0.0177977	0.0193156	0.0180682	0.0447407	0.0441697	0.0412897	0.0342859	0.159105	0.290989	0.21818	0.285822	0.0795772	0.0808879	na	0.0721986	0.055139	0.043401	0.123582	0.0348519	0.0215393	0.00819205	0.00251059	0.00676416	0.0256089	0.109131	0.0744323	0.0550459	0.0247784	0.0261076	0.0292101	0.0177165	0.0462847	0.0720032	0.0452474	0.0502015	0.0566103
200	0.261596	0.309336	0.377579	0.294823	0.0339574	0.0210946	0.0373885	0.0234527	0.0261571	0.0234912	0.0240832	0.0203061	0.0272783	0.0196786	0.0184612	0.0171207	0.0430854	0.0430565	0.0412158	0.0302887	0.195353	0.251032	0.144252	0.170237	0.107309	0.0604999	0.0638597	0.0819335	0.0410639	0.0528832	0.0446246	0.0385809	-0.00521378	0.000748802	-0.00222145	0.000734556	0.130573	0.0955008	0.101597	0.0997108	0.0341868	0.0133572	0.00794897	0.0104336	0.086373	0.0237183	0.0313368	0.0832849	0.0269438
100	0.192877	0.226992	0.345452	0.186304	0.0351375	0.0250343	0.0307633	0.0211706	0.0229332	0.0183852	0.0219724	0.0162813	0.0268265	0.012402	0.0182971	0.0151073	0.0364298	0.0353039	0.0370629	0.0266826	0.153597	0.208273	0.190259	0.195878	0.073861	0.0652445	0.0947714	0.0565331	0.0395106	0.0379936	0.0484502	0.0323914	0.00471717	0.0029781	-0.00127656	0.00268	0.0546049	0.0803894	0.0909071	0.0706014	0.0299146	0.00726197	0.00497028	0.0154499	0.0947475	0.053154	0.0637412	0.062693	0.00470675
50	0.236411	0.215865	0.512187	0.231804	0.0352363	0.0234412	0.0316571	0.022613	0.023736	0.0268362	0.0228798	0.0166164	0.0249894	0.0178581	0.0155823	0.0121932	0.0385815	0.0347591	0.0302608	0.0317367	0.148026	0.176909	0.0838635	0.155054	0.100448	0.0605892	0.067316	0.0849928	0.0348641	0.0413372	0.0254341	0.025809	0.00606194	0.00952193	-0.00324146	-0.00164029	0.108488	0.0731495	0.12338	0.0837528	0.0113755	0.0124505	0.00601979	-0.000396889	0.0851411	0.0624845	0.0441378	0.0506417	0.0163967
25	0.165204	0.144853	0.204366	0.170488	0.0338481	0.0294472	0.0287708	0.0203927	0.0223523	0.0230126	0.0181024	0.0157437	0.0242424	0.015484	0.0112354	0.00921112	0.0343498	0.041702	0.0278368	0.0269871	0.136294	0.182568	0.157327	0.133451	0.0867677	0.0624872	0.054943	0.0648403	0.0283022	0.0306192	0.0260231	0.0263241	-0.000207842	0.00815578	0.000621841	0.000495487	0.0865069	0.06696	0.0641884	0.0604537	0.0111549	0.00547257	0.00728285	-0.00226298	0.0585461	0.0462223	0.0286086	0.0347453	0.0151728
12.5	0.163229	0.131278	0.221162	0.143264	0.0251377	0.0218735	0.024148	0.0153859	0.019077	0.0181675	0.0162927	0.0124181	0.0256725	0.00721835	0.00997488	0.00841299	0.031866	0.0276535	0.0218172	0.0235162	0.127229	0.173496	0.135052	0.112053	0.0999233	0.062662	0.0469468	0.0647525	0.0286601	0.0307155	0.0184038	0.0165605	0.0037231	0.00686491	0.000959272	0.000864747	0.0759916	0.0513596	0.0520985	0.0506962	0.0101498	0.00138419	0.00437748	-0.00927724	0.0556992	0.0358753	0.0260674	0.0288199	0.0085495
6.25	0.117292	0.088011	0.140977	0.0993702	0.0210057	0.018912	0.0166576	0.00858855	0.0154806	0.0128984	0.0155237	0.0113921	0.0205443	0.00483477	0.00804709	0.00615084	0.0255304	0.0175192	0.0207544	0.0180873	0.112839	0.0957046	0.0874546	0.074633	0.0634573	0.041424	0.0472766	0.0462403	0.0219684	0.0172154	0.0169727	0.0136733	-0.00294693	0.00173403	-7.4248e-05	-0.00145899	0.0456334	0.0340032	0.0381476	0.0345207	0.00494129	-0.000885999	0.00563986	-0.00202777	0.0398831	0.0200333	0.0229941	0.022746	0.00220152
3.125	0.0905733	0.0808557	0.103677	0.0797467	0.0131055	0.0189056	0.00857126	-0.00451438	0.0117271	0.011109	0.00761583	0.00672756	0.016693	0.0100763	0.00744372	0.00219249	0.0188805	0.0208257	0.0120788	0.0114353	0.0868648	0.0741639	0.0526114	0.0523028	0.0464863	0.0407486	0.0328288	0.0327365	0.0141775	0.0146013	0.0100801	0.0104958	-0.0054279	0.00749758	-0.00144126	0.00021777	0.0350226	0.0229192	0.0257034	0.0198516	0.0053248	0.00344989	0.00664223	-0.00116838	0.0283065	0.0173199	0.0125592	0.013423	0.00745403
1.5625	0.0879935	0.0687006	0.0584559	0.0459688	0.00580292	0.0127277	0.00564778	-0.00070778	0.00762895	0.00180316	0.00550875	0.00361102	0.0163773	0.00254215	0.00277082	0.00167105	0.0137289	0.00649927	0.00780022	0.00809206	0.0533228	0.0433776	0.0334009	0.0299833	0.0280452	0.0331853	0.0247046	0.0264701	0.0109375	0.00915266	0.00720834	0.00706379	-0.00478825	0.00690778	0.000541748	-0.000770809	0.0278913	0.0159307	0.0129166	0.0110332	0.00461655	-0.0019823	0.00385925	-0.00256899	0.0265452	0.00717293	0.0087299	0.00736728	0.00316041
0.78125	0.0299348	0.028512	0.034465	0.0253274	0.00442927	0.00692516	-0.00456626	-0.00261309	0.00551678	0.00629575	0.00355921	0.00271666	0.0158115	0.00385471	0.00105049	0.00105227	0.0119395	0.00601904	0.00540527	0.0028288	0.0405054	0.0255331	0.0169343	0.0192927	0.0128066	0.0101827	0.0185451	0.0153045	0.00841715	0.00427245	0.00729166	0.00185917	-0.0010472	0.00566103	-0.00215648	0.0001283	0.0139449	0.00874552	0.0089073	na	0.00887161	0.000631053	0.00354984	-0.00720442	0.0141166	0.00603825	0.00694285	0.00141954	0.00416902
0.390625	0.0154042	0.0109942	0.0137951	0.0170394	0.00215588	0.00330754	0.00209234	-0.00287069	0.00780558	0.00367456	0.0046242	0.00163556	0.015494	0.00147584	0.00102682	0.000333529	0.00521415	na	0.00388731	-0.000176362	0.0294877	0.0119408	0.0137682	0.0109725	0.00594533	na	0.00995888	0.00799139	0.00670901	0.005108	0.00140545	na	-0.000784218	0.00340095	-0.00289168	0.000493661	0.00765963	6.55328e-06	0.00244907	na	0.00818284	-0.00167215	0.00118455	-0.00190509	0.00846429	0.0010971	0.00123248	0.00342948	-0.00270075
0	0	na	0	0	0	0	0	0	0	0	0	0	0	0	0	0	0	0	0	0	0	0	0	0	0	0	0	0	0	0	0	na	0	0	0	0	0	0	0	na	0	0	0	0	0	0	0	0	0
PP1-Neurabin
	V1	V2	V3	V4	V5	V6	V7	4EBP-FEMDI	4EBP-SGS	IRSP53-FEMDI	IRSP53-SGS	L5A-FEMDI	L5A-SGS	101Q-FEMDI	101Q-SGS
Catalytic efficiency - Michaelis-Menten
Best-fit values
CE	0.03015	0.005078	0.005272	0.004924	0.007814	0.03254	0.02487	0.004501	0.0004456	0.01058	0.0002652	0.007204	0.002557	0.000129	0.0001753
Km	9.363	6.154	4.362	3.818	4.836	5.736	3.182	9.417	nd	9.589	nd	9.17	nd	40.42	38.86
Std. Error
CE	0.004738	0.001073	0.0007429	0.00182	0.001018	0.004906	0.004523	0.0006395	0.001214	0.001729	0.0001269	0.001858	0.007769	0.0001501	0.0001174
Km	1.775	1.528	0.7101	1.621	0.7309	1.013	0.6596	1.614	10.74	1.892	78.72	2.847	3.842	66.93	36.82
95% CI (profile likelihood)
CE	0.02105 to 0.04363	0.003434 to 0.007604	0.003964 to 0.007077	0.002107 to 0.01272	0.005986 to 0.01027	0.02391 to 0.04461	0.01738 to 0.03609	0.003267 to 0.006259	-2.552e-006 to ???	0.007598 to 0.01492	0.0001027 to 0.0007602	0.004279 to 0.01257	-1.390e-006 to ???	1.415e-005 to ???	3.200e-005 to ???
Km	5.995 to 14.54	3.838 to 9.744	3.105 to 6.068	1.287 to 10.30	3.522 to 6.597	3.967 to 8.241	2.082 to 4.789	6.332 to 13.93	???	6.350 to 14.36	19.26 to 2353	4.712 to 17.31	???	0.4758 to ???	1.468 to ???
Goodness of Fit
Degrees of Freedom	40	42	42	42	41	42	41	40	42	39	42	42	42	42	42
R squared	0.8792	0.8238	0.8979	0.5286	0.9157	0.8924	0.8453	0.8963	0.02509	0.8783	0.4253	0.7427	0.02125	0.1325	0.2504
Sum of Squares	0.05081	0.001252	0.0003121	0.00145	0.0006918	0.02293	0.006059	0.0009336	0.0005288	0.006832	0.001608	0.007894	0.002339	0.0006688	0.000385
Sy.x	0.03564	0.005461	0.002726	0.005876	0.004108	0.02337	0.01216	0.004831	0.003548	0.01324	0.006188	0.01371	0.007463	0.00399	0.003028
Number of points
# of X values	44	44	44	44	44	44	44	44	44	44	44	44	44	44	44
# Y values analyzed	42	44	44	44	43	44	43	42	44	41	44	44	44	44	44
PP1-Phactr1
	V1	V2	V3	V4	V5	V6	V7	4EBP-FEMDI	4EBP-SGS	IRSP53-FEMDI	IRSP53-SGS	L5A-FEMDI	L5A-SGS	101Q-FEMDI	101Q-SGS
Catalytic efficiency - Michaelis-Menten									Interrupted
Best-fit values
CE	0.003223	0.0003645	0.0003923	9.282e-05	0.001183	0.0005333	0.001041	0.0003622	-197.8	0.01266	0.007204	0.001182	0.0007496	0.0004025	0.001576
Km	55.05	37.27	46.69	392.5	675.6	Unstable	234.4	91.49	1.065e-05	13.11	26.18	135.5	99.9	8.806	1.732
Std. Error
CE	0.0004582	8.709e-05	0.000112	2.511e-05	9.875e-05	2.103e-05	0.0003239	6.997e-05		0.002541	0.0009529	0.0002359	0.0001421	0.0001607	0.0006807
Km	12.15	12.5	19.5	362.1	290.6	Unstable	184.4	30.49		3.391	4.7	57.83	33.57	4.221	0.8354
95% CI (profile likelihood)
CE	0.002455 to 0.004254	0.0002035 to 0.0007114	0.0002108 to 0.0007823	5.714e-005 to 0.0001694	0.0009859 to 0.001421	0.0004908 to 0.0005757	0.0005522 to 0.002037	0.0002322 to 0.0005837		0.008510 to 0.01917	0.005496 to 0.009498	0.0008017 to 0.001781	0.0005147 to 0.001104	0.0001583 to 0.001106	0.0005633 to 0.005097
Km	36.32 to 85.42	15.10 to 91.19	17.92 to 128.6	94.54 to ???	324.7 to 4215	(Very wide)	62.69 to ???	42.68 to 224.2		7.735 to 22.05	18.09 to 38.10	62.24 to 375.9	52.90 to 211.8	2.654 to 28.26	0.4689 to 5.558
Goodness of Fit
Degrees of Freedom	41	42	42	41	40	41	42	42		39	40	38	31	31	31
R squared	0.9072	0.694	0.6693	0.717	0.9595	0.912	0.6524	0.8097		0.832	0.9203	0.8119	0.8817	0.6089	0.5122
Sum of Squares	0.009345	0.0001981	0.0004662	0.0002285	0.004371	0.003868	0.02715	0.0004696		0.02431	0.0122	0.006934	0.001197	3.033e-05	2.351e-05
Sy.x	0.0151	0.002172	0.003332	0.002361	0.01045	0.009713	0.02543	0.003344		0.02497	0.01747	0.01351	0.006214	0.0009892	0.0008708
Number of points
# of X values	44	44	44	44	44	44	44	44	44	44	44	44	44	44	44
# Y values analyzed	43	44	44	43	42	43	44	44	44	41	42	40	33	33	33
[truncated: 75 more columns]
