# Supplementary material for: PDZ-directed substrate recruitment is the primary determinant of specific 4E-BP1 dephosphorylation by PP1-Neurabin
Source: eLife journal article supplement (doi:10.7554/elife.103403), 2024-11-20
Supplement: fig5-data1 [file 240402 data analysis.xlsx]

## Sheet: Sheet1
rep1	PP1-Neb 1 nM																PP1-Ph1 2.5 nM
	4ebp-pdz	4ebp-sgs	irsp53-pdz	irsp53-sgs	L5A-PDZ	L5A-SGS	V1	V2	V3	V4	V5	V6	V7	V8			4ebp-pdz	4ebp-sgs	irsp53-pdz	irsp53-sgs	L5A-PDZ	L5A-SGS	V1	V2	V3	V4	V5	V6	V7	V8
600	na	0.0883195	na	0.232283		0.0503602	0.0808836	0.564187	0.21374	0.164693	0.260472	0.279583	0.383132	0.160383			0.770098	0.0487448	0.110904	0.289768	0.251942	0.120862	0.0917596	0.232402	0.266619	0.120295	0.344911	0.098524	0.164297	-0.0571152
300	na	0.0702707	na	0.481147	0.722809	0.125507	0.122851	0.916438	0.316537	0.288808	0.385723	na	0.440933	0.135006			0.793264	0.0300702	0.287483	0.501775	0.687358	0.316313	0.116658	0.269262	0.29009	0.0974266	0.448048	0.3966	0.377469	-0.018986
150	1.11958	0.0931864	na	0.37235	0.718169	0.228745	0.144661	0.974182	0.493743	0.351288	0.539378	na	0.763182	0.267107			0.379725	0.0242536	0.356081	0.552874	0.547516	0.436838	0.155584	0.225357	0.186807	0.0789975	0.552777	0.52708	0.481551	0.110322
75	0.972577	0.0664469	0.952196	0.1849	na	0.072537	0.178291	na	0.451658	0.314069	0.410942	na	0.3152	0.201147			0.194987	0.0103351	0.42187	0.71827	0.538025	0.354132	0.19114	0.216777	0.0990704	0.0368242	0.47836	0.642912	0.345679	0.130177
37.5	1.08995	0.0552097	na	0.147954	na	0.0671231	0.200989	1.4333	0.491133	0.29522	0.461364	na	0.709705	0.3116			0.148297	-0.0068636	0.674536	0.670283	0.491464	0.260379	0.181429	0.0428292	0.07632	-0.00183119	1.30235	0.485346	0.319884	0.218523
18.75	0.548503	0.0323067	na	0.0554553	na	0.018757	0.182435	0.662266	0.345922	0.17614	0.336904	na	0.613844	0.142288			0.109474	-0.0204383	0.5572	0.471356	0.225242	0.158119	0.1507	0.0134065	0.0346157	0.00553297	0.217828	0.292698	0.309286	0.234709
9.375	0.44531	0.0142278	1.05066	0.0319119	0.683049	0.00624232	0.159226	0.861432	0.248537	0.144307	0.305416	na	0.523566	0.198278			0.0667428	-0.012126	0.438746	0.53573	0.101851	0.087938	0.0839752	-0.00471378	0.0203919	0.0019275	0.14792	0.13866	0.134775	0.088932
4.6875	0.266485	0.0137985	0.689684	0.0190743	0.42007	0.00261619	0.118683	0.486955	0.180799	0.123269	0.215009	0.581826	0.331292	0.110421			0.0670358	0.00382424	0.341112	0.319055	0.0470237	0.0491677	0.053446	0.0098693	0.0162235	-0.00762246	0.0284563	0.065318	0.0734046	0.0379434
2.34375	0.126	0.0159731	0.383802	0.0107998	0.229101	0.00137141	0.0956329	0.235747	0.11576	0.0799319	0.0954684	0.307153	0.210016	0.0887857			0.0804281	0.00191182	0.207459	0.211191	0.0323109	0.0151081	0.0214055	-0.017494	0.0032016	-0.00465156	0.0191924	0.0336518	0.0335483	0.0297576
1.17188	0.0742934	0.0176102	0.203285	0.0169784	0.117336	-0.00371583	0.081224	0.067716	0.0662431	0.0774473	0.0562335	0.177533	0.123847	0.0437363			0.081381	-0.00147716	0.100295	0.109283	0.0191692	0.0230198	0.0147409	0.00246273	-0.00132505	-0.0125407	-6.95064e-05	0.0167486	0.0109251	0.00774804
0.585938	0.0147492	0.00144482	0.0737625	0.0217677	0.0480104	-0.00355336	0.0438269	0.0760992	0.0443027	0.0181942	0.0207275	0.078711	0.0677017	0.033156			0.0761741	-0.000650952	0.0450609	0.0465125	0.0081599	0.050876	0.00876474	-0.0011115	-0.00347897	-0.00296426	0.00259368	0.0092232	-0.00196218	0.00289219
0	0	0	0	0	0	0	0	0	0	0	0	0	0	0			0	0	0	0	0	0	0	0	0	0	0	0	0	0
rep2	PP1-Neb 1 nM																PP1-Ph1 2.5 nM
	4ebp-pdz	4ebp-sgs	irsp53-pdz	irsp53-sgs	L5A-PDZ	L5A-SGS	V1	V2	V3	V4	V5	V6	V7	V8			4ebp-pdz	4ebp-sgs	irsp53-pdz	irsp53-sgs	L5A-PDZ	L5A-SGS	V1	V2	V3	V4	V5	V6	V7	V8
600	0.328076	0.0777953	0.387595	0.453449	0.275083	0.0837079	0.214229	0.191872	0.141484	0.121252	0.258484	na	0.649477	0.267315			0.733521	0.0600036	0.121203	0.43088	0.313403	0.201929	0.240443	0.192685	0.386313	0.180103	na	na	na	0.111452
300	0.583848	0.0500679	0.928639	0.389104	0.590208	0.122716	0.325671	0.261022	0.172955	0.150704	0.297085	na	0.667349	0.275737			0.504747	0.0530262	0.287249	0.419465	0.634385	0.357608	0.309539	0.189561	0.372411	0.119769	na	na	na	0.303969
150	0.626487	0.042018	0.866164	0.286507	0.833181	0.189653	0.29425	0.298709	0.20266	0.179474	0.374282	na	0.702837	0.236835			0.307613	0.035386	0.59316	0.509052	0.724346	0.417999	0.360212	0.153055	0.244075	0.114413	na	na	na	0.152257
75	0.772235	0.034764	1.21868	0.177994	1.14609	0.0955964	0.366398	0.350682	0.219906	0.216264	0.44473	na	0.673548	0.415107			0.18165	0.0241357	0.421644	0.543164	0.550945	0.538263	0.278914	0.0773908	0.155073	0.0645009	na	na	na	0.406901
37.5	0.626583	0.0134865	na	0.0882525	1.0193	0.0743302	0.340241	0.194561	0.23631	0.229291	0.444464	na	0.644016	0.370153			0.118332	0.0133192	0.648891	0.447192	0.443285	0.248534	0.337129	0.0367565	0.0682004	0.0384943	1.09601	na	0.898042	0.305676
18.75	0.514025	0.00201145	0.96768	0.0415232	0.789152	0.0370557	0.351253	0.299614	0.240994	0.235546	0.439243	na	0.767078	0.325592			0.0703732	0.007087	0.397138	0.345871	0.244951	0.175353	0.232037	0.029372	0.0667738	0.0242636	0.410382	0.56529	0.399977	0.241035
9.375	0.266317	-1.05295e-05	0.783331	0.025571	0.518683	0.0171627	0.324035	0.388124	0.232667	0.191065	0.368181	na	0.513	0.316699			0.0406908	-0.00999191	0.346641	0.370194	0.122364	0.099656	0.176601	0.0158047	0.0175704	0.0166813	0.214454	0.255051	0.211039	0.130046
4.6875	0.250261	-0.00240402	0.455034	0.00454848	0.414303	0.00518273	0.233535	0.271942	0.15059	0.128172	0.248572	0.822716	0.348636	0.241552			0.0271124	0.0114623	0.322077	0.344335	0.0590156	0.0430914	0.114633	0.00647568	-0.0112458	0.0111556	0.113724	0.123751	0.116607	0.0640506
2.34375	0.125713	0.000351975	0.46423	0.00773883	0.236932	0.00402367	0.175919	0.173823	0.161531	0.0811208	0.137595	0.434234	0.255134	0.164147			0.0446386	0.0164961	0.250347	0.239502	0.031975	0.019655	0.0615425	0.00999933	0.00124355	-0.00076881	0.0580923	0.0734794	0.0596282	0.0254841
1.17188	0.0459655	-0.00829074	0.197112	-0.0015309	0.118801	0.000974746	0.0994625	0.108372	0.06641	0.056243	0.0674789	0.23682	0.139281	0.0917147			0.00722954	0.00363521	0.135691	0.135661	0.0146183	-0.00251753	0.0397619	0.00289976	0.00287524	0.00643104	0.0370894	0.0693443	0.0282661	0.0063175
0.585938	0.00238478	0.00026535	0.0964403	-0.000525627	0.0617815	-0.000299224	0.0653772	0.0644277	0.0411416	0.0315774	0.0712069	0.145535	0.077296	0.0494079			0.0341744	0.00732342	0.0858028	0.0888766	0.00877008	0.00155674	0.0243039	0.00132304	-0.003089	0.00355794	0.0279522	0.00240976	0.0149776	-0.00475202
0	0	0	0	0	0	0	0	0	0	0	0	0	0	0			0	0	0	0	0	0	0	0	0	0	0	0	0	0
rep3	PP1-Neb 1 nM																PP1-Ph1 2.5 nM
	4ebp-pdz	4ebp-sgs	irsp53-pdz	irsp53-sgs	L5A-PDZ	L5A-SGS	V1	V2	V3	V4	V5	V6	V7	V8			4ebp-pdz	4ebp-sgs	irsp53-pdz	irsp53-sgs	L5A-PDZ	L5A-SGS	V1	V2	V3	V4	V5	V6	V7	V8
600	0.365817	0.15339	0.255895	0.236962	0.120671	0.0282116	0.123681	0.43105	0.169245	0.187121	0.235599	-0.0441289	0.355902	-0.0552453			0.854567	0.0517736	0.330753	na	0.403935	0.214143	0.140417	0.218373	0.287598	0.15652	na	0.360508	0.289529	-0.0262577
300	0.714433	0.129214	na	0.552187	0.254557	0.09662	0.226589	1.13903	0.359509	0.330292	0.349305	na	0.387751	0.295656			0.933388	0.055681	0.697764	0.716052	1.0363	0.573398	0.239785	0.264801	0.33903	0.120575	na	na	na	-0.0381794
150	0.705783	0.130064	na	0.249027	1.10548	0.174526	0.317387	na	0.347506	0.325098	0.480421	na	0.606292	0.211052			0.338802	0.0129394	na	0.936081	na	1.06731	0.283564	0.238961	0.224314	0.0733627	na	na	0.81562	0.275317
75	0.705236	0.116866	na	0.136332	na	0.0918213	0.398401	1.31364	0.416262	0.447124	0.245773	na	0.449792	0.165724			0.236652	0.0031046	1.20718	1.17646	1.06019	0.846873	0.385601	0.0826034	0.151437	0.0414119	na	na	na	0.328912
37.5	0.904926	0.081946	na	0.0850356	na	0.0559324	0.413993	na	0.489138	0.33821	0.32844	na	0.441301	0.183799			0.133344	-0.0246458	0.956531	1.05335	0.551545	0.430786	0.355306	0.0476083	0.0819529	0.0152615	0.852954	0.947203	0.992277	0.347814
18.75	0.681313	0.0475361	na	0.0435948	na	0.0228032	0.491823	na	0.372199	0.28081	0.27958	na	0.737499	0.199546			0.0256138	-0.0153445	0.835234	0.623482	0.24467	0.229016	0.257619	0.00263438	0.0258597	-0.00527891	0.274234	0.587307	0.505538	0.257938
9.375	0.406694	0.0618072	0.904546	0.0258125	0.771263	0.0169896	0.297027	0.544832	0.323572	0.275097	0.314633	na	na	0.218196			0.021484	-0.00901032	0.46099	0.48705	0.137984	0.153085	0.182822	-0.0181999	0.0089475	-0.0254984	0.208267	0.236206	0.274613	0.170544
4.6875	0.230919	0.0518013	0.767706	-0.00367677	0.644168	0.0130668	0.223341	0.597726	0.238296	0.141399	0.32238	1.14836	0.377115	0.246279			0.0149706	0.00337033	0.470401	0.434396	0.0643533	0.0572577	0.0885037	0.00228829	0.0316059	-0.0217215	0.1465	0.119164	0.136395	0.0999173
2.34375	0.198177	0.0645608	0.455471	-0.00684479	0.411978	0.00694772	0.210516	0.341263	0.193157	0.078423	0.138402	0.456824	0.303341	0.162737			0.0119129	-0.00678209	0.40285	0.404851	0.018917	0.0431042	0.0732958	-0.012646	-0.00409128	-0.0345283	0.0532752	0.0689167	0.0578024	0.0585259
1.17188	0.069409	0.0465092	0.222187	-0.00105699	0.175882	0.00678598	0.0940059	0.286709	0.0854182	0.00354465	0.0501389	0.28515	0.144191	0.0723537			-0.0191327	-0.0320851	0.13915	0.138994	0.0172879	0.0182987	0.0392683	0.0163942	0.00702061	0.00241842	0.0303503	0.0296191	0.0193826	0.0348491
0.585938	0.0737345	0.0262849	0.173555	0.00408807	0.076575	0.0101792	0.0593414	0.089503	0.0701869	0.00321996	0.0133373	0.171564	0.090855	0.0639899			0.0181604	-0.0452178	0.0348656	0.0677009	-5.90916e-05	0.0106796	0.0195032	-0.0133918	0.0446421	0.0203696	0.0264708	0.0201196	0.0158612	0.0287994
0	0	0	0	0	0	0	0	0	0	0	0	0	0	0			0	0	0	0	0	0	0	0	0	0	0	0	0	0
rep4	PP1-Neb 1 nM																PP1-Ph1 2.5 nM
	4ebp-pdz	4ebp-sgs	irsp53-pdz	irsp53-sgs	L5A-PDZ	L5A-SGS	V1	V2	V3	V4	V5	V6	V7	V8			4ebp-pdz	4ebp-sgs	irsp53-pdz	irsp53-sgs	L5A-PDZ	L5A-SGS	V1	V2	V3	V4	V5	V6	V7	V8
600	0.417215	na	na	na	na	na	na	0.0857974	0.417456	0.19131	0.854637	na	0.164961	-0.00319279			0.366665	0.0993203	na	na	0.427761	na	0.217106	0.22959	0.10362	1.1095	na	na	0.10931	na
300	na	0.20644	0.484114	na	na	na	na	0.0862427	na	0.0742864	na	na	na	0.284108			0.155672	0.0619683	0.690068	na	0.108016	na	0.316336	0.0991953	0.488291	0.186803	na	na	na	-0.180905
150	1.14202	0.0459154	na	0.109048	na	0.11195	na	0.514666	na	0.318403	0.844358	na	na	0.0223594			0.25248	0.0409305	na	na	na	na	0.492705	0.238337	0.36164	0.153331	na	na	0.21951	na
75	1.15353	0.0527453	0.998249	0.0752673	na	0.0923953	0.721272	0.416748	na	0.367156	0.749398	na	na	0.238989			0.0819308	0.0204479	1.34145	1.09201	na	0.758835	0.448089	0.129374	0.185121	0.101014	na	na	0.122166	na
37.5	0.767897	na	na	0.131704	na	0.0474681	0.726519	0.491547	1.05561	0.56401	na	na	0.739872	0.280882			0.123946	0.0264859	1.32676	na	1.05733	0.678952	0.343521	0.065697	0.101378	0.0454776	na	na	na	0.405996
18.75	0.575793	0.00995435	na	0.0632162	na	0.0304438	0.490543	0.464212	0.983132	0.40179	1.29554	na	0.280368	0.410121			0.0747388	0.0206892	1.12724	0.634545	0.32805	0.200801	0.231338	0.03907	0.0670562	0.0401847	0.795392	0.794462	0.790788	0.313283
9.375	0.298777	-0.000275687	na	0.0222802	na	0.0195548	0.528291	na	na	0.363312	0.853513	na	0.620807	0.311633			0.0238522	0.00562134	0.897483	0.827729	0.16492	0.0847787	0.195442	0.0196764	0.0184066	0.0138091	0.362099	0.360804	0.359114	0.206758
4.6875	0.164194	-0.0168443	1.42261	0.0229398	0.938146	0.0105021	0.360213	0.337802	0.314224	0.209751	0.610018	na	0.274121	0.25573			-0.00180884	-0.00311593	0.94037	0.856088	0.107576	0.0822238	0.102234	0.00222125	0.0131993	0.00824352	0.120265	0.162648	0.139575	0.103903
2.34375	0.121651	-0.0192888	0.473091	0.0169219	0.386922	0.0145036	0.21693	0.171027	0.254587	0.177018	0.308752	0.729082	0.17247	0.147043			-0.00474668	0.00234089	0.331292	0.345908	0.0417524	0.027218	0.0454857	-0.0142651	-0.000948553	-0.00394068	0.0455714	0.0683024	0.0793763	0.044886
1.17188	0.0572477	-0.00490906	0.269074	0.0122059	0.180076	0.0162633	0.114423	0.136499	0.10561	0.0741615	0.0868558	0.241083	0.0738847	0.0805293			0.00608583	-0.011276	0.149881	0.194851	0.0349994	0.00018919	0.0318977	-0.00545498	-0.00946015	-0.0051692	0.0185773	0.0270998	0.0342082	0.0268444
0.585938	0.0385645	-0.0147385	0.130742	0.0232821	0.101199	0.0217282	0.073342	0.0754381	0.0468354	0.0360419	0.0438903	0.118443	0.0384987	0.0565316			0.00283521	-0.0125051	0.0709823	0.0835234	0.0209483	5.25205e-05	0.0198913	-0.010411	-0.00504067	0.0089578	0.0103772	0.0223296	0.0163286	0.0139656
0	0	0	0	0	0	0	0	0	0	0	0	0	0	0			0	0	0	0	0	0	0	0	0	0	0	0	0	0
	2	18	34	50	2	18	34	50	2	18	34	50	2	18	34	50	2	18	34	50	2	18	34	50	2	18	34	50	2	18	34	50	2	18	34	50	2	18	34	50	2	18	34	50	2	18	34	50	2
	1	1	1	1	2	2	2	2	3	3	3	3	4	4	4	4	5	5	5	5	6	6	6	6	7	7	7	7	8	8	8	8	9	9	9	9	10	10	10	10	11	11	11	11	12	12	12	12	13
	PP1-Neurabin
	V1				V2				V3				V4				V5				V6				V7				4EBP-FEMDI				4EBP-SGS				IRSP53-FEMDI				IRSP53-SGS				L5A-FEMDI				L5A-SGS
1	na	0.328076	0.365817	0.417215	0.0883195	0.0777953	0.15339	na	na	0.387595	0.255895	na	0.232283	0.453449	0.236962	na	0	0.275083	0.120671	na	0.0503602	0.0837079	0.0282116	na	0.0808836	0.214229	0.123681	na	0.564187	0.191872	0.43105	0.0857974	0.21374	0.141484	0.169245	0.417456	0.164693	0.121252	0.187121	0.19131	0.260472	0.258484	0.235599	0.854637	0.279583	na	-0.0441289	na	0.383132
2	na	0.583848	0.714433	na	0.0702707	0.0500679	0.129214	0.20644	na	0.928639	na	0.484114	0.481147	0.389104	0.552187	na	0.722809	0.590208	0.254557	na	0.125507	0.122716	0.09662	na	0.122851	0.325671	0.226589	na	0.916438	0.261022	1.13903	0.0862427	0.316537	0.172955	0.359509	na	0.288808	0.150704	0.330292	0.0742864	0.385723	0.297085	0.349305	na	na	na	na	na	0.440933
3	1.11958	0.626487	0.705783	1.14202	0.0931864	0.042018	0.130064	0.0459154	na	0.866164	na	na	0.37235	0.286507	0.249027	0.109048	0.718169	0.833181	1.10548	na	0.228745	0.189653	0.174526	0.11195	0.144661	0.29425	0.317387	na	0.974182	0.298709	na	0.514666	0.493743	0.20266	0.347506	na	0.351288	0.179474	0.325098	0.318403	0.539378	0.374282	0.480421	0.844358	na	na	na	na	0.763182
4	0.972577	0.772235	0.705236	1.15353	0.0664469	0.034764	0.116866	0.0527453	0.952196	1.21868	na	0.998249	0.1849	0.177994	0.136332	0.0752673	na	1.14609	na	na	0.072537	0.0955964	0.0918213	0.0923953	0.178291	0.366398	0.398401	0.721272	na	0.350682	1.31364	0.416748	0.451658	0.219906	0.416262	na	0.314069	0.216264	0.447124	0.367156	0.410942	0.44473	0.245773	0.749398	na	na	na	na	0.3152
5	1.08995	0.626583	0.904926	0.767897	0.0552097	0.0134865	0.081946	na	na	na	na	na	0.147954	0.0882525	0.0850356	0.131704	na	1.0193	na	na	0.0671231	0.0743302	0.0559324	0.0474681	0.200989	0.340241	0.413993	0.726519	1.4333	0.194561	na	0.491547	0.491133	0.23631	0.489138	1.05561	0.29522	0.229291	0.33821	0.56401	0.461364	0.444464	0.32844	na	na	na	na	na	0.709705
6	0.548503	0.514025	0.681313	0.575793	0.0323067	0.00201145	0.0475361	0.00995435	na	0.96768	na	na	0.0554553	0.0415232	0.0435948	0.0632162	na	0.789152	na	na	0.018757	0.0370557	0.0228032	0.0304438	0.182435	0.351253	0.491823	0.490543	0.662266	0.299614	na	0.464212	0.345922	0.240994	0.372199	0.983132	0.17614	0.235546	0.28081	0.40179	0.336904	0.439243	0.27958	1.29554	na	na	na	na	0.613844
7	0.44531	0.266317	0.406694	0.298777	0.0142278	-1.05295e-05	0.0618072	-0.000275687	1.05066	0.783331	0.904546	na	0.0319119	0.025571	0.0258125	0.0222802	0.683049	0.518683	0.771263	na	0.00624232	0.0171627	0.0169896	0.0195548	0.159226	0.324035	0.297027	0.528291	0.861432	0.388124	0.544832	na	0.248537	0.232667	0.323572	na	0.144307	0.191065	0.275097	0.363312	0.305416	0.368181	0.314633	0.853513	na	na	na	na	0.523566
8	0.266485	0.250261	0.230919	0.164194	0.0137985	-0.00240402	0.0518013	-0.0168443	0.689684	0.455034	0.767706	1.42261	0.0190743	0.00454848	-0.00367677	0.0229398	0.42007	0.414303	0.644168	0.938146	0.00261619	0.00518273	0.0130668	0.0105021	0.118683	0.233535	0.223341	0.360213	0.486955	0.271942	0.597726	0.337802	0.180799	0.15059	0.238296	0.314224	0.123269	0.128172	0.141399	0.209751	0.215009	0.248572	0.32238	0.610018	0.581826	0.822716	1.14836	na	0.331292
9	0.126	0.125713	0.198177	0.121651	0.0159731	0.000351975	0.0645608	-0.0192888	0.383802	0.46423	0.455471	0.473091	0.0107998	0.00773883	-0.00684479	0.0169219	0.229101	0.236932	0.411978	0.386922	0.00137141	0.00402367	0.00694772	0.0145036	0.0956329	0.175919	0.210516	0.21693	0.235747	0.173823	0.341263	0.171027	0.11576	0.161531	0.193157	0.254587	0.0799319	0.0811208	0.078423	0.177018	0.0954684	0.137595	0.138402	0.308752	0.307153	0.434234	0.456824	0.729082	0.210016
10	0.0742934	0.0459655	0.069409	0.0572477	0.0176102	-0.00829074	0.0465092	-0.00490906	0.203285	0.197112	0.222187	0.269074	0.0169784	-0.0015309	-0.00105699	0.0122059	0.117336	0.118801	0.175882	0.180076	-0.00371583	0.000974746	0.00678598	0.0162633	0.081224	0.0994625	0.0940059	0.114423	0.067716	0.108372	0.286709	0.136499	0.0662431	0.06641	0.0854182	0.10561	0.0774473	0.056243	0.00354465	0.0741615	0.0562335	0.0674789	0.0501389	0.0868558	0.177533	0.23682	0.28515	0.241083	0.123847
11	0.0147492	0.00238478	0.0737345	0.0385645	0.00144482	0.00026535	0.0262849	-0.0147385	0.0737625	0.0964403	0.173555	0.130742	0.0217677	-0.000525627	0.00408807	0.0232821	0.0480104	0.0617815	0.076575	0.101199	-0.00355336	-0.000299224	0.0101792	0.0217282	0.0438269	0.0653772	0.0593414	0.073342	0.0760992	0.0644277	0.089503	0.0754381	0.0443027	0.0411416	0.0701869	0.0468354	0.0181942	0.0315774	0.00321996	0.0360419	0.0207275	0.0712069	0.0133373	0.0438903	0.078711	0.145535	0.171564	0.118443	0.0677017
12	0	0	0	0	0	0	0	0	0	0	0	0	0	0	0	0	0	0	0	0	0	0	0	0	0	0	0	0	0	0	0	0	0	0	0	0	0	0	0	0	0	0	0	0	0	0	0	0	0
Normaalized to 1nM
	4EBP-FEMDI				4EBP-SGS				IRSP53-FEMDI				IRSP53-SGS				L5A-FEMDI				L5A-SGS				V1				V2				V3				V4				V5				V6				V7
600	#VALUE!	1.3123	1.46327	1.66886	0.353278	0.311181	0.61356	#VALUE!	#VALUE!	1.55038	1.02358	#VALUE!	0.929131	1.8138	0.947846	#VALUE!	0	1.10033	0.482683	#VALUE!	0.201441	0.334832	0.112846	#VALUE!	0.323534	0.856917	0.494724	#VALUE!	2.25675	0.767488	1.7242	0.343189	0.85496	0.565934	0.676979	1.66982	0.658772	0.485006	0.748484	0.76524	1.04189	1.03394	0.942395	3.41855	1.11833	#VALUE!	-0.176516	#VALUE!	1.53253
300	#VALUE!	2.33539	2.85773	#VALUE!	0.281083	0.200271	0.516857	0.82576	#VALUE!	3.71456	#VALUE!	1.93646	1.92459	1.55641	2.20875	#VALUE!	2.89123	2.36083	1.01823	#VALUE!	0.502029	0.490863	0.38648	#VALUE!	0.491402	1.30268	0.906355	#VALUE!	3.66575	1.04409	4.55613	0.344971	1.26615	0.691819	1.43804	#VALUE!	1.15523	0.602815	1.32117	0.297146	1.54289	1.18834	1.39722	#VALUE!	#VALUE!	#VALUE!	#VALUE!	#VALUE!	1.76373
150	4.47833	2.50595	2.82313	4.56808	0.372746	0.168072	0.520254	0.183662	#VALUE!	3.46466	#VALUE!	#VALUE!	1.4894	1.14603	0.996108	0.436193	2.87268	3.33273	4.42191	#VALUE!	0.914981	0.75861	0.698106	0.447799	0.578643	1.177	1.26955	#VALUE!	3.89673	1.19484	#VALUE!	2.05866	1.97497	0.810638	1.39002	#VALUE!	1.40515	0.717895	1.30039	1.27361	2.15751	1.49713	1.92169	3.37743	#VALUE!	#VALUE!	#VALUE!	#VALUE!	3.05273
75	3.89031	3.08894	2.82094	4.61412	0.265788	0.139056	0.467465	0.210981	3.80878	4.87473	#VALUE!	3.993	0.739598	0.711974	0.545327	0.301069	#VALUE!	4.58436	#VALUE!	#VALUE!	0.290148	0.382386	0.367285	0.369581	0.713164	1.46559	1.5936	2.88509	#VALUE!	1.40273	5.25457	1.66699	1.80663	0.879624	1.66505	#VALUE!	1.25628	0.865054	1.7885	1.46862	1.64377	1.77892	0.983092	2.99759	#VALUE!	#VALUE!	#VALUE!	#VALUE!	1.2608
37.5	4.3598	2.50633	3.6197	3.07159	0.220839	0.0539461	0.327784	#VALUE!	#VALUE!	#VALUE!	#VALUE!	#VALUE!	0.591817	0.35301	0.340142	0.526814	#VALUE!	4.07721	#VALUE!	#VALUE!	0.268492	0.297321	0.22373	0.189872	0.803955	1.36096	1.65597	2.90608	5.73319	0.778245	#VALUE!	1.96619	1.96453	0.94524	1.95655	4.22245	1.18088	0.917165	1.35284	2.25604	1.84546	1.77786	1.31376	#VALUE!	#VALUE!	#VALUE!	#VALUE!	#VALUE!	2.83882
18.75	2.19401	2.0561	2.72525	2.30317	0.129227	0.00804579	0.190144	0.0398174	#VALUE!	3.87072	#VALUE!	#VALUE!	0.221821	0.166093	0.174379	0.252865	#VALUE!	3.15661	#VALUE!	#VALUE!	0.075028	0.148223	0.0912127	0.121775	0.72974	1.40501	1.96729	1.96217	2.64907	1.19846	#VALUE!	1.85685	1.38369	0.963974	1.4888	3.93253	0.704561	0.942185	1.12324	1.60716	1.34761	1.75697	1.11832	5.18214	#VALUE!	#VALUE!	#VALUE!	#VALUE!	2.45537
9.375	1.78124	1.06527	1.62678	1.19511	0.0569114	-4.21182e-05	0.247229	-0.00110275	4.20264	3.13333	3.61818	#VALUE!	0.127647	0.102284	0.10325	0.0891207	2.7322	2.07473	3.08505	#VALUE!	0.0249693	0.0686507	0.0679584	0.0782193	0.636906	1.29614	1.18811	2.11316	3.44573	1.5525	2.17933	#VALUE!	0.994148	0.930666	1.29429	#VALUE!	0.577226	0.764261	1.10039	1.45325	1.22166	1.47272	1.25853	3.41405	#VALUE!	#VALUE!	#VALUE!	#VALUE!	2.09427
4.6875	1.06594	1.00104	0.923678	0.656776	0.0551941	-0.00961607	0.207205	-0.067377	2.75874	1.82014	3.07083	5.69045	0.076297	0.0181939	-0.0147071	0.0917592	1.68028	1.65721	2.57667	3.75258	0.0104648	0.0207309	0.052267	0.0420082	0.474731	0.934142	0.893363	1.44085	1.94782	1.08777	2.39091	1.35121	0.723198	0.602358	0.953184	1.2569	0.493074	0.512688	0.565596	0.839003	0.860034	0.994286	1.28952	2.44007	2.32731	3.29087	4.59345	#VALUE!	1.32517
2.34375	0.504001	0.502851	0.792708	0.486606	0.0638924	0.0014079	0.258243	-0.0771551	1.53521	1.85692	1.82189	1.89236	0.0431993	0.0309553	-0.0273791	0.0676874	0.916403	0.947727	1.64791	1.54769	0.00548565	0.0160947	0.0277909	0.0580144	0.382532	0.703677	0.842065	0.867721	0.942989	0.695293	1.36505	0.684109	0.463039	0.646123	0.772626	1.01835	0.319727	0.324483	0.313692	0.708073	0.381874	0.550378	0.553607	1.23501	1.22861	1.73694	1.8273	2.91633	0.840063
1.17188	0.297174	0.183862	0.277636	0.228991	0.0704407	-0.033163	0.186037	-0.0196362	0.813142	0.788448	0.888747	1.07629	0.0679137	-0.00612362	-0.00422798	0.0488238	0.469342	0.475206	0.703527	0.720305	-0.0148633	0.00389898	0.0271439	0.065053	0.324896	0.39785	0.376024	0.45769	0.270864	0.433488	1.14684	0.545997	0.264972	0.26564	0.341673	0.422441	0.309789	0.224972	0.0141786	0.296646	0.224934	0.269916	0.200555	0.347423	0.710134	0.947279	1.1406	0.964331	0.495386
0.585938	0.0589967	0.00953913	0.294938	0.154258	0.00577929	0.0010614	0.10514	-0.058954	0.29505	0.385761	0.694221	0.522966	0.0870706	-0.00210251	0.0163523	0.0931284	0.192041	0.247126	0.3063	0.404797	-0.0142135	-0.0011969	0.0407168	0.0869129	0.175307	0.261509	0.237365	0.293368	0.304397	0.257711	0.358012	0.301752	0.177211	0.164566	0.280748	0.187342	0.0727768	0.12631	0.0128798	0.144167	0.0829101	0.284827	0.0533493	0.175561	0.314844	0.582139	0.686255	0.47377	0.270807
0	0	0	0	0	0	0	0	0	0	0	0	0	0	0	0	0	0	0	0	0	0	0	0	0	0	0	0	0	0	0	0	0	0	0	0	0	0	0	0	0	0	0	0	0	0	0	0	0	0
PP1-Neurabin
Catalytic efficiency - Michaelis-Menten
Best-fit values
CE	0.317	0.003092	1.158	0.008833	1.088	0.005897	0.6489	0.815	0.5283	0.3187	0.6726	0.8971	0.7377	0.5527
Km	12.06	247.8	5.296	710.9	3.074	556.1	2.246	3.26	3.269	3.932	3.069	20.27	3.405	1.998
Std. Error
CE	0.05838	0.001257	0.2898	0.001125	0.2906	0.0007898	0.2728	0.4071	0.2504	0.1004	0.3023	0.1996	0.167	0.1534
Km	2.711	214.6	2.518	361.4	0.951	399	1.06	1.841	1.762	1.402	1.559	28.07	0.8782	0.6169
95% CI (profile likelihood)
CE	0.2276 to 0.4479	0.001340 to 0.007890	0.7243 to 1.907	0.006726 to 0.01162	0.6713 to 1.807	0.004555 to 0.007809	0.3142 to 1.506	0.3190 to 2.287	0.2343 to 1.348	0.1839 to 0.5771	0.3172 to 1.547	0.6547 to ???	0.4898 to 1.133	0.3385 to 0.9436
Km	7.934 to 18.07	50.94 to ???	2.271 to 15.54	304.2 to 8360	1.701 to 5.307	196.7 to ???	0.8745 to 5.035	1.009 to 9.318	1.126 to 8.149	2.011 to 7.296	1.197 to 7.102	-16.85 to ???	2.090 to 5.414	1.102 to 3.436
Goodness of Fit
Degrees of Freedom	40	30	21	41	30	38	40	37	38	42	40	17	38	41
R squared	0.8609	0.647	0.7967	0.9113	0.7455	0.9187	0.5025	0.4397	0.4672	0.6581	0.4946	0.8512	0.7938	0.6938
Sum of Squares	12.44	0.3317	10.4	1.115	16.21	0.1581	10.61	45.62	17.62	4.766	24.8	4.288	8.491	2.728
Sy.x	0.5577	0.1051	0.7036	0.1649	0.7352	0.06451	0.515	1.11	0.681	0.3369	0.7874	0.5022	0.4727	0.258
Number of points
# of X values	44	44	44	44	44	44	44	44	44	44	44	44	44	44
# Y values analyzed	42	32	23	43	32	40	42	39	40	44	42	19	40	43
PP1-Phactr1
	4EBP-FEMDI	4EBP-SGS	IRSP53-FEMDI	IRSP53-SGS	L5A-FEMDI	L5A-SGS	V1	V2	V3	V4	V5	V6	V7	V8
Catalytic efficiency - Michaelis-Menten
Best-fit values
CE	0.0008981	5.705e-05	0.05447	0.05795	0.006695	0.005651	0.01183	0.0008021	0.0008383	0.0003433	0.01864	0.02004	0.02094	0.01734
Km	809.3	Unstable	6.168	4.821	48.37	57.09	9.167	138.9	294.7	236	14.82	11.59	9.006	4.07
Std. Error
CE	0.0002164	2.418e-05	0.01547	0.01565	0.0005908	0.001368	0.003028	0.0001665	0.0001032	7.262e-05	0.006464	0.005235	0.008579	0.01084
Km	825.1	Unstable	2.409	1.618	8.875	23.27	2.755	49.94	84.04	104.7	7.039	4.062	4.577	2.909
95% CI (profile likelihood)
CE	0.0006046 to 0.001505	4.278e-005 to 7.048e-005	0.03023 to 0.1006	0.03245 to 0.1054	0.005677 to 0.007907	0.003638 to 0.008933	0.007480 to 0.01921	0.0005591 to 0.001154	0.0006548 to 0.001074	0.0002307 to 0.0005101	0.01081 to 0.03360	0.01306 to 0.03159	0.01077 to 0.04296	0.007003 to 0.05220
Km	195.0 to ???	(Very wide)	2.732 to 14.64	2.313 to 10.10	34.88 to 69.34	27.87 to 129.4	5.206 to 15.69	77.43 to 274.2	175.7 to 577.1	113.4 to 670.0	6.702 to 30.16	6.336 to 20.16	3.719 to 20.18	1.151 to 11.05
Goodness of Fit
Degrees of Freedom	42	42	30	33	31	37	42	42	42	42	32	31	35	40
R squared	0.756	0.5844	0.722	0.7258	0.9604	0.777	0.7576	0.8348	0.9278	0.8243	0.6277	0.7451	0.5697	0.3546
Sum of Squares	0.04617	0.0009497	0.1257	0.1112	0.004629	0.06689	0.02215	0.006075	0.005324	0.002126	0.1514	0.06149	0.1286	0.05579
Sy.x	0.03316	0.004755	0.06474	0.05804	0.01222	0.04252	0.02296	0.01203	0.01126	0.007115	0.06878	0.04454	0.06063	0.03735
Number of points
# of X values	44	44	44	44	44	44	44	44	44	44	44	44	44	44
# Y values analyzed	44	44	32	35	33	39	44	44	44	44	34	33	37	42
PP1-Neurabin		Catalytic efficiency - Michaelis-Menten	Best-fit values	CE	Km	Std. Error	CE	Km	95% CI (profile likelihood)	CE	Km	Goodness of Fit	Degrees of Freedom	R squared	Sum of Squares	Sy.x		Number of points	# of X values	# Y values analyzed			PP1-Phactr1		Catalytic efficiency - Michaelis-Menten	Best-fit values	CE	Km	Std. Error	CE	Km	95% CI (profile likelihood)	CE	Km	Goodness of Fit	Degrees of Freedom	R squared	Sum of Squares	Sy.x		Number of points	# of X values	# Y values analyzed
	4EBP-FEMDI		317	0.317	12.06		0.05838	2.711		0.2276 to 0.4479	7.934 to 18.07		40	0.8609	12.44	0.5577			44	42				4EBP-FEMDI			0.0008981	809.3		0.0002164	825.1		0.0006046 to 0.001505	195.0 to ???		42	0.756	0.04617	0.03316			44	44
	4EBP-SGS		7.306	0.007306	72.49		0.002885	41.85		0.003100 to 0.01832	20.71 to 329.3		41	0.5552	0.6604	0.1269			44	43				4EBP-SGS			5.705e-05	Unstable		2.418e-05	Unstable		4.278e-005 to 7.048e-005	(Very wide)		42	0.5844	0.0009497	0.004755			44	44
	IRSP53-FEMDI		1712	1.712	2.342		0.4298	0.6951		1.103 to 2.752	1.335 to 3.893		28	0.7664	18.37	0.81			44	30				IRSP53-FEMDI			0.0846	2.926		0.03508	1.373		0.04180 to 0.1863	1.199 to 6.447		40	0.5269	0.3014	0.0868			44	42
	IRSP53-SGS		8.833	0.008833	710.9		0.001125	361.4		0.006726 to 0.01162	304.2 to 8360		41	0.9113	1.115	0.1649			44	43				IRSP53-SGS			0.07343	3.301		0.02201	1.127		0.04168 to 0.1341	1.663 to 6.286		39	0.6738	0.1466	0.0613			44	41
	L5A-FEMDI		1088	1.088	3.074		0.2906	0.951		0.6713 to 1.807	1.701 to 5.307		30	0.7455	16.21	0.7352			44	32				L5A-FEMDI			0.0108	23.78		0.003189	8.945		0.006536 to 0.01821	12.33 to 44.83		39	0.7123	0.129	0.05752			44	41
	L5A-SGS		10.65	0.01065	70.98		0.002207	22.09		0.007473 to 0.01545	41.55 to 122.7		41	0.8238	0.3888	0.09738			44	43				L5A-SGS			0.007719	28.49		0.002325	11.27		0.004696 to 0.01311	14.42 to 54.70		40	0.7048	0.09418	0.04852			44	42
	V1		648.9	0.6489	2.246		0.2728	1.06		0.3142 to 1.506	0.8745 to 5.035		40	0.5025	10.61	0.515			44	42				V1			0.01183	9.167		0.003028	2.755		0.007480 to 0.01921	5.206 to 15.69		42	0.7576	0.02215	0.02296			44	44
	V2		815	0.815	3.26		0.4071	1.841		0.3190 to 2.287	1.009 to 9.318		37	0.4397	45.62	1.11			44	39				V2			0.0008021	138.9		0.0001665	49.94		0.0005591 to 0.001154	77.43 to 274.2		42	0.8348	0.006075	0.01203			44	44
	V3		528.3	0.5283	3.269		0.2504	1.762		0.2343 to 1.348	1.126 to 8.149		38	0.4672	17.62	0.681			44	40				V3			0.0008383	294.7		0.0001032	84.04		0.0006548 to 0.001074	175.7 to 577.1		42	0.9278	0.005324	0.01126			44	44
	V4		318.7	0.3187	3.932		0.1004	1.402		0.1839 to 0.5771	2.011 to 7.296		42	0.6581	4.766	0.3369			44	44				V4			0.0003433	236		7.262e-05	104.7		0.0002307 to 0.0005101	113.4 to 670.0		42	0.8243	0.002126	0.007115			44	44
	V5		672.6	0.6726	3.069		0.3023	1.559		0.3172 to 1.547	1.197 to 7.102		40	0.4946	24.8	0.7874			44	42				V5			0.01864	14.82		0.006464	7.039		0.01081 to 0.03360	6.702 to 30.16		32	0.6277	0.1514	0.06878			44	34
	V6		897.1	0.8971	20.27		0.1996	28.07		0.6547 to ???	-16.85 to ???		17	0.8512	4.288	0.5022			44	19				V6			0.02004	11.59		0.005235	4.062		0.01306 to 0.03159	6.336 to 20.16		31	0.7451	0.06149	0.04454			44	33
	V7		737.7	0.7377	3.405		0.167	0.8782		0.4898 to 1.133	2.090 to 5.414		38	0.7938	8.491	0.4727			44	40				V7			0.02094	9.006		0.008579	4.577		0.01077 to 0.04296	3.719 to 20.18		35	0.5697	0.1286	0.06063			44	37
	V8		552.7	0.5527	1.998		0.1534	0.6169		0.3385 to 0.9436	1.102 to 3.436		41	0.6938	2.728	0.258			44	43				V8			0.01734	4.07		0.01084	2.909		0.007003 to 0.05220	1.151 to 11.05		40	0.3546	0.05579	0.03735			44	42
[truncated: 75 more columns]
