# Supplementary material for: PDZ-directed substrate recruitment is the primary determinant of specific 4E-BP1 dephosphorylation by PP1-Neurabin
Source: eLife journal article supplement (doi:10.7554/elife.103403), 2024-11-20
Supplement: fig5-data1 [file Assay rep2.xlsx]

## Sheet: All Cycles
Well Row	Well Col	Content	Raw Data (425-10/460-20)	Raw Data (425-10/460-20)	Raw Data (425-10/460-20)	Raw Data (425-10/460-20)	Raw Data (425-10/460-20)	Raw Data (425-10/460-20)			Content	Raw Data (425-10/460-20)	Raw Data (425-10/460-20)	Raw Data (425-10/460-20)	Raw Data (425-10/460-20)	Raw Data (425-10/460-20)	Raw Data (425-10/460-20)	Content	Well Row	Well Col	Raw Data (425-10/460-20)	Raw Data (425-10/460-20)	Raw Data (425-10/460-20)	Raw Data (425-10/460-20)	Raw Data (425-10/460-20)						PP1-Neb 0.25nM																PP1-Ph1 1.25 nM
		Time [s]	0	180	360	540	720	900			Time [s]	0	180	360	540	720	900	Time [s]			0	4	8	12	16						4EBP-70-PDZ	4EBP-70-SGS	IRSp53-PDZ	IRSp53-SGS	4EBP-101-PDZ	4EBP-101-SGS	L5A-PDZ	L5A-SGS	V1	V2	V3	V5	V6	V7	V8		4EBP-70-PDZ	4EBP-70-SGS	IRSp53-PDZ
A	1	Sample X1	6159	6563	6889	7220	7596	7933				0.212757	0.268465	0.315734	0.366008	0.426118	0.482922		A	1	0.182589	0.249633	0.289324	0.336837	0.398936	0.0144231	0			400	0.0144231	0.00186975	0.0336633	0.000993724	0.000148538	0.000931778	0.0324654	0.000967463	0.279669	0.0179906	0.0122169	0.0247311	0.199925	0.060729	0.341858		0.00887385	0.000810067	0.0274037
A	2	Sample X2	4075	4698	4771	4879	5167	5410				-0.0324909	0.0342744	0.0424321	0.0546361	0.0879914	0.11709		A	2	0.0903719	0.165269	0.174897	0.190399	0.22348	0.00887385	0			200	0.0112237	0.00225364	0.0224471	0.00143608	0.000336509	0.00158242	0.0216	0.00336055	0.106775	0.0115493	0.00899161	0.0173413	0.0780363	0.0369103	0.110005		0.00408127	0.00331116	0.0278407
A	3	Sample X3	5365	5747	6196	6309	6623	6876				0.111634	0.158975	0.217733	0.233084	0.277004	0.313807		A	3	0.0814661	0.140143	0.191323	0.203913	0.249822	0.0112237	0			100	0.012932	0.00215841	0.0320685	-0.000401621	0.000173496	-0.000473216	0.024284	0.00153041	0.119077	0.014462	0.0103939	0.0209146	0.128372	0.0428123	0.186323		0.00201003	0.00125819	0.0229043
A	4	Sample X4	3685	3968	3920	4005	4164	4275				-0.0718482	-0.0434678	-0.0483474	-0.0396876	-0.0232546	-0.0115978		A	4	0.0510146	0.0875268	0.0841171	0.0960749	0.112234	0.00408127	0			50	0.0115923	0.00195669	0.028899	0.00109965	0.000229428	-0.000822437	0.0228425	0.0016286	0.12891	0.0133263	0.0097047	0.0218631	0.109365	0.0527084	0.151816		0.00154296	0.00165757	0.0250852
A	5	Sample X5	6766	7209	7438	7575	7966	8352				0.297646	0.364299	0.400455	0.422673	0.488641	0.557751		A	5	0.267478	0.345467	0.374045	0.393501	0.461459	0.012932	0			25	0.00604944	-0.000805532	0.0176719	-0.00180362	0.000859708	9.14239e-06	0.0168098	0.000676352	0.057383	0.00893223	0.00626156	0.0132869	0.0626045	0.0295376	0.0714209		0.00100652	0.000587584	0.0182846
A	6	Sample X6	3628	3749	3680	3725	3805	3863				-0.0774528	-0.0655112	-0.0723413	-0.0678931	-0.0599278	-0.0541066		A	6	0.0454099	0.0654834	0.0601233	0.0678695	0.0755604	0.00201003	0			12.5	0.00498369	0.000976254	0.0137456	0.00120226	-0.000456196	-0.000142151	0.0116505	0.00182242	0.0467674	0.00835872	0.00614382	0.00984372	0.0455626	0.027005	0.0667194		-1.33364e-05	-0.000295133	0.0139064
A	7	Sample X7	6342	6679	6991	7270	7488	7777				0.237612	0.285039	0.330974	0.373812	0.408511	0.456268		A	7	0.207444	0.266207	0.304564	0.344641	0.381329	0.0115923	0			6.25	0.00145235	0.000133722	0.00792327	-0.000169217	-0.00051886	-0.00117313	0.0069691	0.00087668	0.0255581	0.00256642	-0.00604333	0.00469373	0.0185041	0.0152007	0.0259994		0.000386702	-0.00324179	0.0057475
A	8	Sample X8	4099	4213	4130	4196	4200	4253				-0.0300097	-0.0181277	-0.0267945	-0.0199098	-0.0194908	-0.0139204		A	8	0.092853	0.112867	0.10567	0.115853	0.115997	0.00154296	0			3.125	0.001165	0.000403246	0.00608251	-0.000104636	-0.000578917	-0.00151957	0.00253436	0.00174597	0.0141425	0.00363736	0.000251915	0.00295866	0.0142733	0.0107714	0.0213134		0.000598571	-0.000374019	0.00588917
A	9	Sample X9	5524	5668	5932	6096	6204	6410				0.131056	0.148992	0.182762	0.204341	0.218812	0.247006		A	9	0.100888	0.13016	0.156352	0.17517	0.19163	0.00604944	0			1.5625	0.000728603	0.000172144	0.0037475	0.000978068	-0.000557574	0.000769561	0.00278594	0.001764	0.00988182	0.00158399	0.000447914	0.00063629	0.0076178	0.0070051	0.011488		0.000390391	0.000944761	0.00250932
A	10	Sample X10	3694	3750	3714	3735	3719	3734				-0.0709598	-0.0654118	-0.0689825	-0.0669014	-0.0684875	-0.0670006		A	10	0.0519029	0.0655828	0.0634821	0.0688611	0.0670007	0.00100652	0			0.78125	0.000500816	0.000113945	0.00100029	-0.000335672	-0.000700972	-0.000455889	0.00311982	0.00175048	0.00452874	0.000966109	0.000333173	-0.00201336	0.00294618	0.00639593	0.00387248		0.00239202	0.000379385	0.00270994
A	11	Sample X11	5589	5843	6026	6057	6145	6311				0.13911	0.171246	0.195073	0.199167	0.210881	0.233358		A	11	0.108943	0.152415	0.168663	0.169995	0.183698	0.00498369	0			0.390625	-0.000501164	0.000227988	0.00104275	-0.000354395	-9.39761e-05	0.000206021	-5.96359e-05	0.000121962	-0.00219282	0.00808667	-0.000163516	0.000604374	0.00646503	-0.000252428	0.00238916		-0.00533994	-0.00375178	0.000446572
A	12	Sample X12	3817	3700	3651	3639	3688	3655				-0.0587266	-0.0703671	-0.0751957	-0.0763741	-0.0715522	-0.0748025		A	12	0.0641361	0.0606275	0.0572689	0.0593885	0.063936	-1.33364e-05	0			0	0	0	0	0	0	0	0	0	0	0	0	0	0	0	0		0	0	0
A	13	Sample X13	4760	4848	4836	4847	4926	4967				0.0411982	0.0511165	0.0497576	0.0510031	0.0599981	0.0647013		A	13	0.0110307	0.0322848	0.0233478	0.0218319	0.032816	0.00145235	0
A	14	Sample X14	3371	3309	3275	3287	3299	3248				-0.102274	-0.108154	-0.111362	-0.110231	-0.109099	-0.1139		A	14	0.0205887	0.0228402	0.0211029	0.0255314	0.0263892	0.000386702	0				3	27	51	75	99	123	147	171	195	219	243	267	291	315	339		3	27	51
A	15	Sample X15	5560	5524	5621	5638	5676	5662				0.135508	0.131056	0.143101	0.145227	0.149998	0.148238		A	15	0.105341	0.112224	0.116691	0.116056	0.122816	0.001165	0				PP1-Neb 0.25nM																PP1-Ph1 1.25 nM
A	16	Sample X16	3696	3619	3639	3688	3659	3676				-0.0707623	-0.0783344	-0.0763741	-0.0715522	-0.0744092	-0.0727355		A	16	0.0521004	0.0526602	0.0560905	0.0642104	0.061079	0.000598571	0				4EBP-70-PDZ	4EBP-70-SGS	IRSp53-PDZ	IRSp53-SGS	4EBP-101-PDZ	4EBP-101-SGS	L5A-PDZ	L5A-SGS	V1	V2	V3	V5	V6	V7	V8		4EBP-70-PDZ	4EBP-70-SGS	IRSp53-PDZ
A	17	Sample X17	5296	5276	5322	5305	5362	5377				0.103327	0.100933	0.106449	0.104407	0.111271	0.113086		A	17	0.0731597	0.0821015	0.0800388	0.0752352	0.0840888	0.000728603	0		0	400	0.0144231	0.00186975	0.0336633	0.000993724	0.000148538	0.000931778	0.0324654	0.000967463	0.279669	0.0179906	0.0122169	0.0247311	0.199925	0.060729	0.341858		0.00887385	0.000810067	0.0274037
A	18	Sample X18	3925	3895	3859	3787	3858	3824				-0.0478404	-0.0508781	-0.0545094	-0.0617264	-0.05461	-0.0580252		A	18	0.0750223	0.0801165	0.0779552	0.0740361	0.0808782	0.000390391	0		2	200	0.0112237	0.00225364	0.0224471	0.00143608	0.000336509	0.00158242	0.0216	0.00336055	0.106775	0.0115493	0.00899161	0.0173413	0.0780363	0.0369103	0.110005		0.00408127	0.00331116	0.0278407
A	19	Sample X19	5022	4983	5007	5020	5061	5058				0.0710481	0.0665431	0.0693128	0.0708165	0.075575	0.075226		A	19	0.0408806	0.0477115	0.042903	0.0416453	0.0483929	0.000500816	0		4	100	0.012932	0.00215841	0.0320685	-0.000401621	0.000173496	-0.000473216	0.024284	0.00153041	0.119077	0.014462	0.0103939	0.0209146	0.128372	0.0428123	0.186323		0.00201003	0.00125819	0.0229043
A	20	Sample X20	3782	3737	3146	3352	4012	3961				-0.0622254	-0.066703	-0.12342	-0.10408	-0.0389706	-0.0441811		A	20	0.0606374	0.0642917	0.00904487	0.0316821	0.0965176	0.00239202	0		6	50	0.0115923	0.00195669	0.028899	0.00109965	0.000229428	-0.000822437	0.0228425	0.0016286	0.12891	0.0133263	0.0097047	0.0218631	0.109365	0.0527084	0.151816		0.00154296	0.00165757	0.0250852
A	21	Sample X21	5486	5369	5435	5436	5400	5431				0.126378	0.112117	0.120135	0.120257	0.115875	0.119648		A	21	0.0962103	0.0932858	0.0937256	0.0910862	0.0886928	-0.000501164	0		8	25	0.00604944	-0.000805532	0.0176719	-0.00180362	0.000859708	9.14239e-06	0.0168098	0.000676352	0.057383	0.00893223	0.00626156	0.0132869	0.0626045	0.0295376	0.0714209		0.00100652	0.000587584	0.0182846
A	22	Sample X22	4673	4370	4468	3815	3792	4302				0.0314974	-0.00149811	0.00904179	-0.058927	-0.0612272	-0.00873903		A	22	0.15436	0.129496	0.141506	0.0768356	0.074261	-0.00533994	0		10	12.5	0.00498369	0.000976254	0.0137456	0.00120226	-0.000456196	-0.000142151	0.0116505	0.00182242	0.0467674	0.00835872	0.00614382	0.00984372	0.0455626	0.027005	0.0667194		-1.33364e-05	-0.000295133	0.0139064
A	23	Sample X23	4661	4558	4627	4652	4634	4624				0.0301675	0.0188316	0.0264098	0.0291713	0.0271822	0.026079		A	23	0	0	0	0	0	0	0		12	6.25	0.00145235	0.000133722	0.00792327	-0.000169217	-0.00051886	-0.00117313	0.0069691	0.00087668	0.0255581	0.00256642	-0.00604333	0.00469373	0.0185041	0.0152007	0.0259994		0.000386702	-0.00324179	0.0057475
A	24	Sample X24	3152	3064	3048	3012	3015	3030				-0.122863	-0.130995	-0.132465	-0.135763	-0.135488	-0.134115		A	24	0	0	0	0	0	0	0		14	3.125	0.001165	0.000403246	0.00608251	-0.000104636	-0.000578917	-0.00151957	0.00253436	na	0.0141425	0.00363736	0.000251915	0.00295866	0.0142733	0.0107714	0.0213134		0.000598571	-0.000374019	0.00588917
B	1	Sample X25	4877	4885	4928	4892	5008	5063				0.0544086	0.0553189	0.060227	0.0561161	0.0694284	0.0758078		B	1	0.106297	0.122518	0.127426	0.119438	0.134343	0.00186975	0		16	1.5625	0.000728603	0.000172144	0.0037475	0.000978068	-0.000557574	0.000769561	0.00278594	na	0.00988182	0.00158399	0.000447914	0.00063629	0.0076178	0.0070051	0.011488		0.000390391	0.000944761	0.00250932
B	2	Sample X26	5319	5335	5272	5372	5353	5392				0.106088	0.108013	0.100455	0.11248	0.110184	0.114904		B	2	0.145366	0.148622	0.14004	0.164167	0.157517	0.000810067	0		18	0.78125	0.000500816	0.000113945	0.00100029	-0.000335672	-0.000700972	-0.000455889	0.00311982	na	0.00452874	0.000966109	0.000333173	-0.00201336	0.00294618	0.00639593	0.00387248		0.00239202	0.000379385	0.00270994
B	3	Sample X27	3943	4061	4281	4144	4145	4240				-0.0460127	-0.033935	-0.0109633	-0.0253386	-0.0252345	-0.01529		B	3	0.00587564	0.0332641	0.0562357	0.0379834	0.0396802	0.00225364	0		20	0.390625	-0.000501164	0.000227988	0.00104275	-0.000354395	-9.39761e-05	0.000206021	-5.96359e-05	0.000121962	-0.00219282	0.00808667	-0.000163516	0.000604374	0.00646503	-0.000252428	0.00238916		-0.00533994	-0.00375178	0.000446572
B	4	Sample X28	4355	4589	4649	4686	4736	4800				-0.00310044	0.0222285	0.0288395	0.0329404	0.0385118	0.0456932		B	4	0.0361775	0.0628371	0.0684247	0.0846268	0.0858449	0.00331116	0		22	0	0	0	0	0	0	0	0	0	0	na	0	0	0	0	0		0	0	0
B	5	Sample X29	4895	4970	5006	5017	5063	5051				0.056458	0.0650463	0.0691973	0.0704693	0.0758078	0.0744122		B	5	0.108346	0.132245	0.136396	0.133791	0.140723	0.00215841	0
B	6	Sample X30	4585	4621	4702	4716	4683	4702				0.0217894	0.0257483	0.0347196	0.0362792	0.0326072	0.0347196		B	6	0.0610674	0.0663569	0.0743048	0.0879655	0.0799403	0.00125819	0
B	7	Sample X31	5065	5156	5147	5043	5204	5250				0.0760406	0.0866952	0.085636	0.0734829	0.0923645	0.0978299		B	7	0.127929	0.153894	0.152835	0.136805	0.157279	0.00195669	0
B	8	Sample X32	5070	5187	5268	5238	5213	5215				0.0766229	0.0903527	0.0999772	0.0964011	0.0934313	0.0936685		B	8	0.115901	0.130961	0.139562	0.148087	0.140764	0.00165757	0
B	9	Sample X33	4587	4519	4553	4448	4355	4410				0.0220089	0.0145763	0.0182849	0.00688068	-0.00310044	0.00278889		B	9	0.0738973	0.0817753	0.085484	0.0702027	0.0618143	-0.000805532	0
B	10	Sample X34	4479	4579	4501	4452	4486	4466				0.0102326	0.0211313	0.012619	0.00731249	0.0109912	0.00882544		B	10	0.0495106	0.0617399	0.0522042	0.0589989	0.0583243	0.000587584	0
B	11	Sample X35	4433	4415	4464	4469	4448	4445				0.00526327	0.00332622	0.00860915	0.00914998	0.00688068	0.00655697		B	11	0.0571516	0.0705253	0.0758082	0.072472	0.0717954	0.000976254	0
B	12	Sample X36	4841	4714	4713	4773	4730	4734				0.0503236	0.0360562	0.0359447	0.0426567	0.0378414	0.0382883		B	12	0.0896015	0.0766648	0.0755299	0.094343	0.0851745	-0.000295133	0
B	13	Sample X37	3796	3775	3732	3716	3685	3597				-0.0608276	-0.0629234	-0.067199	-0.0687845	-0.0718482	-0.0804856		B	13	-0.00893926	0.00427561	0	-0.00546249	-0.00693343	0.000133722	0
B	14	Sample X38	4850	4370	5211	4230	4334	4180				0.0513431	-0.00149811	0.0931941	-0.0163421	-0.00533888	-0.0215838		B	14	0.0906211	0.0391105	0.132779	0.0353443	0.0419942	-0.00324179	0
B	15	Sample X39	4436	4379	4406	4396	4371	4271				0.00558652	-0.000535329	0.00235927	0.0012861	-0.00139119	-0.0120206		B	15	0.0574748	0.0666637	0.0695583	0.0646081	0.0635235	0.000403246	0
B	16	Sample X40	4881	4797	4803	4770	4760	4764				0.0548636	0.0453553	0.0460312	0.0423199	0.0411982	0.0416467		B	16	0.0941416	0.0859639	0.0856164	0.0940063	0.0885313	-0.000374019	0
B	17	Sample X41	4392	4432	4376	4289	4294	4316				0.000857194	0.00515554	-0.000856372	-0.0101166	-0.00958704	-0.00725306		B	17	0.0527455	0.0723546	0.0663427	0.0532054	0.0553277	0.000172144	0
B	18	Sample X42	5121	5175	5129	5154	5173	5181				0.0825829	0.0889352	0.0835212	0.0864597	0.0886991	0.0896437		B	18	0.121861	0.129544	0.123106	0.138146	0.136032	0.000944761	0
B	19	Sample X43	4101	4089	4125	4090	3991	4017				-0.0298027	-0.0310444	-0.0273139	-0.030941	-0.0411199	-0.0384581		B	19	0.0220857	0.0361546	0.0398851	0.0323811	0.0237948	0.000113945	0
B	20	Sample X44	4806	4565	4590	4599	4785	4599				0.0463693	0.0195975	0.0223383	0.023327	0.044005	0.023327		B	20	0.0856473	0.0602062	0.0619235	0.0750133	0.0913381	0.000379385	0
B	21	Sample X45	4401	4278	4273	4275	4311	4272				0.00182252	-0.0112806	-0.0118092	-0.0115978	-0.00778405	-0.0119149		B	21	0.0537108	0.0559184	0.0553898	0.0517242	0.0571307	0.000227988	0
B	22	Sample X46	5222	5413	4238	5589	4661	4876				0.0944993	0.117455	-0.0155005	0.13911	0.0301675	0.0542949		B	22	0.133777	0.158064	0.0240847	0.190797	0.0775006	-0.00375178	0
B	23	Sample X47	3885	3732	3732	3771	3755	3755				-0.0518883	-0.067199	-0.067199	-0.063322	-0.0649147	-0.0649147		B	23	0	0	0	0	0	0	0
B	24	Sample X48	4009	3996	4006	3887	3930	3927				-0.039278	-0.0406086	-0.0395852	-0.0516864	-0.0473331	-0.0476375		B	24	0	0	0	0	0	0	0
C	1	Sample X49	9032	10423	10227	10531	11036	11442				0.690297	1.01427	0.963577	1.043	1.1856	1.31112		C	1	0.714177	1.04521	0.998542	1.07508	1.21913	0.0336633	0
C	2	Sample X50	8778	9614	9533	10069	10559	11039				0.639069	0.816259	0.797965	0.924033	1.05055	1.18649		C	2	0.643662	0.820319	0.807446	0.92724	1.05472	0.0274037	0
C	3	Sample X51	6186	6786	7426	7777	8274	8687				0.216385	0.300566	0.39853	0.456268	0.543449	0.621227		C	3	0.240266	0.331507	0.433495	0.488346	0.576972	0.0224471	0
C	4	Sample X52	7289	7497	8247	8532	9519	9551				0.376793	0.409968	0.538539	0.591435	0.79483	0.802008		C	4	0.381386	0.414028	0.54802	0.594643	0.798997	0.0278407	0
C	5	Sample X53	6284	7116	8009	8481	9084	9587				0.229668	0.349955	0.496137	0.581794	0.701053	0.810132		C	5	0.253548	0.380896	0.531102	0.613871	0.734576	0.0320685	0
C	6	Sample X54	6316	6823	7478	7930	8461	8925				0.234043	0.305989	0.406895	0.482403	0.578034	0.668455		C	6	0.238636	0.31005	0.416376	0.48561	0.582201	0.0229043	0
C	7	Sample X55	6283	7085	7861	8283	8850	9412				0.229531	0.345216	0.470542	0.54509	0.653373	0.771113		C	7	0.253411	0.376157	0.505507	0.577168	0.686896	0.028899	0
C	8	Sample X56	5994	6620	7369	7834	8405	8906				0.190865	0.276575	0.389433	0.465934	0.56757	0.664617		C	8	0.195458	0.280636	0.398914	0.469141	0.571737	0.0250852	0
C	9	Sample X57	4856	5414	5990	6444	6833	7285				0.0520235	0.117577	0.19034	0.251735	0.30746	0.376165		C	9	0.0759038	0.148518	0.225305	0.283813	0.340983	0.0176719	0
C	10	Sample X58	4830	5382	5953	6458	6943	7357				0.049079	0.113691	0.185499	0.253689	0.323775	0.387528		C	10	0.0536723	0.117752	0.19498	0.256897	0.327942	0.0182846	0
C	11	Sample X59	4879	5287	5723	6079	6440	6748				0.0546361	0.102249	0.155931	0.202082	0.251178	0.295025		C	11	0.0785164	0.13319	0.190896	0.23416	0.2847	0.0137456	0
C	12	Sample X60	5223	5481	5948	6388	6807	7152				0.0946181	0.125764	0.184847	0.243957	0.30364	0.355485		C	12	0.0992114	0.129824	0.194328	0.247164	0.307808	0.0139064	0
C	13	Sample X61	3855	4144	4375	4691	4876	5117				-0.0549119	-0.0253386	-0.000963361	0.033496	0.0542949	0.082114		C	13	-0.0310316	0.00560237	0.0340016	0.0655739	0.0878175	0.00792327	0
C	14	Sample X62	4736	4689	4954	5483	5476	5713				0.0385118	0.0332737	0.0632074	0.126009	0.125151	0.154666		C	14	0.0431052	0.0373342	0.0726885	0.129217	0.129318	0.0057475	0
C	15	Sample X63	4379	4610	4808	5052	5108	5261				-0.000535329	0.0245368	0.0465948	0.0745284	0.08106	0.0991415		C	15	0.023345	0.0554778	0.0815598	0.106606	0.114583	0.00608251	0
C	16	Sample X64	5051	5253	5484	5636	5780	5906				0.0744122	0.0981874	0.126132	0.144977	0.163176	0.179384		C	16	0.0790055	0.102248	0.135613	0.148184	0.167343	0.00588917	0
C	17	Sample X65	4320	4548	4583	4648	4747	4844				-0.00682804	0.0177386	0.02157	0.0287289	0.0397421	0.0506633		C	17	0.0170523	0.0486796	0.056535	0.0608067	0.0732647	0.0037475	0
C	18	Sample X66	5101	5151	5242	5316	5420	5555				0.0802411	0.0861066	0.0968771	0.105727	0.118307	0.134889		C	18	0.0848344	0.0901671	0.106358	0.108935	0.122474	0.00250932	0
C	19	Sample X67	4538	4396	4508	4502	4587	4614				0.0166469	0.0012861	0.0133797	0.0127277	0.0220089	0.0249772		C	19	0.0405272	0.0322271	0.0483447	0.0448055	0.0555315	0.00100029	0
C	20	Sample X68	4472	4676	4754	4771	4843	4870				0.00947464	0.0318302	0.0405259	0.0424321	0.05055	0.0536129		C	20	0.014068	0.0358907	0.0500069	0.0456393	0.0547171	0.00270994	0
C	21	Sample X69	4358	4342	4347	4378	4414	4468				-0.00278021	-0.0044868	-0.00395384	-0.000642356	0.00321873	0.00904179		C	21	0.0211001	0.0264542	0.0310112	0.0314355	0.0367413	0.00104275	0
C	22	Sample X70	4930	4978	4886	4958	4992	5006				0.0604559	0.0659671	0.0554327	0.0636668	0.0675808	0.0691973		C	22	0.0650493	0.0700276	0.0649138	0.066874	0.0717479	0.000446572	0
C	23	Sample X71	4158	4090	4051	4079	4065	4052				-0.0238803	-0.030941	-0.034965	-0.0320778	-0.0335226	-0.0348621		C	23	0	0	0	0	0	0	0
C	24	Sample X72	4341	4346	4295	4354	4345	4340				-0.00459336	-0.00406046	-0.00948108	-0.00320716	-0.00416707	-0.0046999		C	24	0	0	0	0	0	0	0
D	1	Sample X73	5676	5959	5658	5624	5717	5712				0.149998	0.186282	0.147735	0.143476	0.155172	0.154539		D	1	0.193466	0.243104	0.20305	0.196877	0.208372	0.000993724	0
D	2	Sample X74	7292	8436	8933	9577	10251	10853				0.377264	0.573351	0.670075	0.80787	0.969685	1.1323		D	2	0.382497	0.58071	0.683362	0.819257	0.961076	0.0385719	0
D	3	Sample X75	4122	4173	4280	4274	4235	4241				-0.0276254	-0.0223151	-0.0110691	-0.0117035	-0.0158162	-0.0151847		D	3	0.0158424	0.0345062	0.0442451	0.0416979	0.0373837	0.00143608	0
D	4	Sample X76	5441	6150	6755	7189	7751	8257				0.120868	0.21155	0.296043	0.361198	0.451887	0.540355		D	4	0.1261	0.21891	0.309331	0.372584	0.443278	0.0211452	0
D	5	Sample X77	5629	5559	5525	5456	5502	5534				0.144101	0.135384	0.131179	0.122701	0.128345	0.13229		D	5	0.187569	0.192206	0.186493	0.176102	0.181544	-0.000401621	0
D	6	Sample X78	5804	6738	7424	8046	8709	9320				0.166243	0.293572	0.398209	0.502627	0.625517	0.751066		D	6	0.171475	0.300931	0.411497	0.514014	0.616907	0.0296955	0
D	7	Sample X79	5755	5789	5784	5733	5808	5758				0.159992	0.164325	0.163686	0.157198	0.166755	0.160373		D	7	0.20346	0.221146	0.219001	0.2106	0.219954	0.00109965	0
D	8	Sample X80	6299	6817	7555	8187	8816	9332				0.231716	0.305108	0.419401	0.527702	0.646597	0.753663		D	8	0.236948	0.312467	0.432689	0.539088	0.637988	0.026736	0
D	9	Sample X81	4614	4363	4416	4333	4273	4379				0.0249772	-0.00224622	0.00343372	-0.00544533	-0.0118092	-0.000535329		D	9	0.068445	0.0545752	0.058748	0.0479561	0.0413906	-0.00180362	0
D	10	Sample X82	4885	5394	5986	6490	6942	7403				0.0553189	0.115147	0.189815	0.25817	0.323625	0.39485		D	10	0.0605513	0.122506	0.203103	0.269556	0.315016	0.0169643	0
D	11	Sample X83	4293	4304	4516	4401	4371	4328				-0.00969298	-0.0085269	0.0142498	0.00182252	-0.00139119	-0.0059774		D	11	0.0337748	0.0482945	0.069564	0.055224	0.0518086	0.00120226	0
D	12	Sample X84	4954	5537	6123	6555	6959	7363				0.0632074	0.132661	0.207939	0.267331	0.326169	0.38848		D	12	0.0684398	0.14002	0.221227	0.278718	0.31756	0.016608	0
D	13	Sample X85	3093	3016	3026	2995	2959	2985				-0.128324	-0.135397	-0.134482	-0.137315	-0.140594	-0.138227		D	13	-0.0848558	-0.0785754	-0.0791673	-0.0839139	-0.0873941	-0.000169217	0
D	14	Sample X86	4644	4784	4949	5257	5600	5871				0.0282867	0.0438925	0.0626335	0.0986644	0.14048	0.174855		D	14	0.0335191	0.0512518	0.0759211	0.110051	0.131871	0.0065568	0
D	15	Sample X87	4478	4464	4345	4373	4373	4382				0.0101243	0.00860915	-0.00416707	-0.0011773	-0.0011773	-0.00021417		D	15	0.0535921	0.0654305	0.0511472	0.0522241	0.0520225	-0.000104636	0
D	16	Sample X88	4985	5288	5615	5782	6068	6275				0.0667736	0.102369	0.142351	0.163431	0.200623	0.22844		D	16	0.072006	0.109728	0.155639	0.174818	0.192014	0.00800055	0
D	17	Sample X89	4023	4138	4126	4059	4071	4028				-0.0378427	-0.0259629	-0.02721	-0.0341411	-0.0329037	-0.0373295		D	17	0.0056251	0.0308585	0.0281042	0.0192604	0.0202961	0.000978068	0
D	18	Sample X90	4927	5265	5414	5539	5675	5832				0.0601126	0.099619	0.117577	0.132908	0.149872	0.169832		D	18	0.065345	0.106978	0.130864	0.144295	0.141263	0.0050612	0
D	19	Sample X91	4149	4032	4042	3971	4006	4052				-0.0248181	-0.0369187	-0.035891	-0.0431619	-0.0395852	-0.0348621		D	19	0.0186497	0.0199026	0.0194232	0.0102395	0.0136146	-0.000335672	0
D	20	Sample X92	4731	5020	5043	5097	5161	5234				0.0379531	0.0708165	0.0734829	0.0797734	0.0872841	0.0959253		D	20	0.0431855	0.0781758	0.0867705	0.0911598	0.078675	0.00236596	0
D	21	Sample X93	3905	3827	3811	3769	3755	3763				-0.0498667	-0.0577244	-0.0593274	-0.0635213	-0.0649147	-0.0641188		D	21	-0.00639896	-0.000903019	-0.00401319	-0.0101199	-0.0117149	-0.000354395	0
D	22	Sample X94	4687	4718	4818	4886	4846	4889				0.0330515	0.0365022	0.0477232	0.0554327	0.0508898	0.0557743		D	22	0.0382839	0.0438615	0.0610107	0.0668191	0.0422807	0.000266451	0
D	23	Sample X95	3968	3836	3851	3870	3872	3876				-0.0434678	-0.0568214	-0.0553142	-0.0534014	-0.0531998	-0.0527965		D	23	0	0	0	0	0	0	0
D	24	Sample X96	4335	4315	4259	4277	4464	4275				-0.00523241	-0.00735929	-0.0132876	-0.0113864	0.00860915	-0.0115978		D	24	0	0	0	0	0	0	0
E	1	Sample X97	4413	4478	4532	4477	4428	4404				0.00311125	0.0101243	0.0159925	0.010016	0.00472478	0.00214453		E	1	0.0421843	0.0390982	0.0529112	0.0487816	0.0444124	0.000148538	0
E	2	Sample X98	5736	5696	5739	5715	5693	5666				0.157579	0.152518	0.157959	0.154919	0.15214	0.14874		E	2	0.185723	0.1847	0.187348	0.180153	0.178103	-0.000508021	0
E	3	Sample X99	4042	4161	4207	4129	4085	4056				-0.035891	-0.0235675	-0.0187571	-0.0268984	-0.0314579	-0.0344501		E	3	0.00318206	0.00540636	0.0181616	0.0118672	0.00822969	0.000336509	0
E	4	Sample X100	4548	4693	4587	4641	4727	4789				0.0177386	0.0337184	0.0220089	0.0279552	0.0375064	0.0444549		E	4	0.0458829	0.0658995	0.0513973	0.0531897	0.0634693	0.00117243	0
E	5	Sample X101	4629	4607	4642	4617	4647	4686				0.0266304	0.0242067	0.0280657	0.0253076	0.0286183	0.0329404		E	5	0.0657035	0.0531806	0.0649844	0.0640732	0.0683059	0.000173496	0
E	6	Sample X102	5172	5079	5191	5110	5091	5101				0.0885811	0.0776719	0.0908257	0.0812941	0.0790724	0.0802411		E	6	0.116725	0.109853	0.120214	0.106529	0.105035	-0.000779345	0
E	7	Sample X103	4818	4895	4961	4860	4843	4850				0.0477232	0.056458	0.0640115	0.0524773	0.05055	0.0513431		E	7	0.0867962	0.0854318	0.10093	0.0912429	0.0902376	0.000229428	0
E	8	Sample X104	5447	5616	5602	5414	5385	5383				0.121601	0.142476	0.140729	0.117577	0.114055	0.113813		E	8	0.149745	0.174657	0.170118	0.142811	0.140018	-0.000648466	0
E	9	Sample X105	3517	3573	3652	3687	3643	3588				-0.0882625	-0.0828261	-0.0750974	-0.0716508	-0.0759814	-0.081364		E	9	-0.0491895	-0.0538523	-0.0381787	-0.0328852	-0.0362938	0.000859708	0
E	10	Sample X106	4637	4807	4653	4565	4552	4473				0.0275134	0.0464821	0.0292819	0.0195975	0.0181756	0.00958288		E	10	0.0556577	0.0786632	0.0586703	0.0448321	0.0441385	-0.000767944	0
E	11	Sample X107	3791	3803	3805	3735	3716	3714				-0.0613271	-0.0601278	-0.0599278	-0.0669014	-0.0687845	-0.0689825		E	11	-0.022254	-0.031154	-0.0230091	-0.0281358	-0.0290969	-0.000456196	0
E	12	Sample X108	4865	5041	4828	4799	4835	4829				0.0530449	0.0732508	0.0488529	0.0455805	0.0496445	0.0489659		E	12	0.0811892	0.105432	0.0782412	0.0708151	0.0756074	-0.000372122	0
E	13	Sample X109	3438	3355	3453	3377	3350	3370				-0.0958729	-0.103795	-0.0944332	-0.101703	-0.10427	-0.102369		E	13	-0.0567999	-0.0748216	-0.0575144	-0.0629372	-0.0645828	-0.00051886	0
E	14	Sample X110	4301	4242	4273	4306	4281	4276				-0.00884507	-0.0150794	-0.0118092	-0.00831472	-0.0109633	-0.0114921		E	14	0.0192992	0.0171017	0.0175791	0.0169198	0.0149995	-0.000286643	0
E	15	Sample X111	3940	3916	3855	3820	3848	3870				-0.0463176	-0.0487528	-0.0549119	-0.0584261	-0.0556159	-0.0534014		E	15	-0.00724451	-0.019779	-0.0179932	-0.0196605	-0.0159283	-0.000578917	0
E	16	Sample X112	5005	4902	4881	4888	4880	4845				0.0690817	0.0572562	0.0548636	0.0556605	0.0547499	0.0507766		E	16	0.097226	0.0894373	0.084252	0.080895	0.0807127	-0.00110088	0
E	17	Sample X113	4608	4597	4606	4558	4526	4505				0.0243167	0.0231071	0.0240967	0.0188316	0.0153386	0.0130536		E	17	0.0633898	0.052081	0.0610154	0.0575973	0.0550262	-0.000557574	0
E	18	Sample X114	5391	5467	5361	5372	5362	5350				0.114783	0.124047	0.11115	0.11248	0.111271	0.109822		E	18	0.142927	0.156229	0.140538	0.137715	0.137234	-0.000379534	0
E	19	Sample X115	4509	4433	4361	4352	4406	4387				0.0134884	0.00526327	-0.00245986	-0.00342056	0.00235927	0.000321351		E	19	0.0525615	0.0342371	0.0344589	0.0353451	0.0420469	-0.000700972	0
E	20	Sample X116	4368	4661	4457	4433	4456	4437				-0.00171192	0.0301675	0.00785254	0.00526327	0.0077445	0.00569429		E	20	0.0264323	0.0623486	0.0372409	0.0304978	0.0337074	0.000485002	0
E	21	Sample X117	3916	3971	3881	3874	3896	3883				-0.0487528	-0.0431619	-0.0522921	-0.0529982	-0.050777	-0.0520902		E	21	-0.00967978	-0.014188	-0.0153733	-0.0142326	-0.0110894	-9.39761e-05	0
E	22	Sample X118	4726	4740	4739	4731	4741	4757				0.0373948	0.038959	0.0388472	0.0379531	0.0390708	0.040862		E	22	0.0655391	0.0711401	0.0682355	0.0631877	0.0650337	-3.36917e-05	0
E	23	Sample X119	4011	4109	4032	4014	4005	4018				-0.0390731	-0.0289739	-0.0369187	-0.0387656	-0.0396876	-0.0383555		E	23	0	0	0	0	0	0	0
E	24	Sample X120	4117	4078	4105	4145	4138	4149				-0.0281443	-0.0321811	-0.0293884	-0.0252345	-0.0259629	-0.0248181		E	24	0	0	0	0	0	0	0
F	1	Sample X121	4620	4742	4718	4701	4713	4722				0.0256381	0.0391827	0.0365022	0.0346083	0.0359447	0.0369484		F	1	0.156633	0.170821	0.169517	0.168449	0.170609	0.000931778	0
F	2	Sample X122	4933	5004	4976	5004	5007	5072				0.0607994	0.0689662	0.0657369	0.0689662	0.0693128	0.0768559		F	2	0.109248	0.11782	0.122257	0.120249	0.105615	-0.000242211	0
F	3	Sample X123	3862	3988	4041	3981	4059	4133				-0.0542073	-0.0414265	-0.0359938	-0.0421415	-0.0341411	-0.0264827		F	3	0.0767873	0.0902116	0.0970213	0.0916989	0.100524	0.00158242	0
F	4	Sample X124	4232	4265	4339	4270	4249	4294				-0.0161318	-0.0126543	-0.00480643	-0.0121262	-0.014342	-0.00958704		F	4	0.0323171	0.0361999	0.0517137	0.0391561	0.0219602	-0.000690457	0
F	5	Sample X125	4729	4780	4749	4659	4632	4680				0.0377298	0.0434429	0.039966	0.029946	0.0269614	0.0322741		F	5	0.168724	0.175081	0.172981	0.163786	0.161626	-0.000473216	0
F	6	Sample X126	4843	4952	4941	4751	4788	4815				0.05055	0.0629778	0.061716	0.0401899	0.0443424	0.0473845		F	6	0.0989988	0.111832	0.118236	0.0914722	0.0806446	-0.00122362	0
F	7	Sample X127	4876	5010	4865	4728	4734	4802				0.0542949	0.0696596	0.0530449	0.0376181	0.0382883	0.0459185		F	7	0.18529	0.201298	0.18606	0.171458	0.172953	-0.000822437	0
F	8	Sample X128	5100	5468	4999	5036	5021	5022				0.0801241	0.12417	0.0683887	0.0726706	0.0709323	0.0710481		F	8	0.128573	0.173024	0.124909	0.123953	0.107235	-0.00142256	0
F	9	Sample X129	3418	3284	3489	3428	3381	3395				-0.0977888	-0.110514	-0.0909677	-0.0968314	-0.101322	-0.0999867		F	9	0.0332058	0.0211242	0.0420474	0.0370089	0.0333429	9.14239e-06	0
F	10	Sample X130	4446	4378	4386	4427	4400	4367				0.00666486	-0.000642356	0.000214221	0.00461712	0.00171521	-0.00181881		F	10	0.0551137	0.0482118	0.0567344	0.0558995	0.0380175	-0.00113975	0
F	11	Sample X131	4134	4152	4096	4063	4078	4020				-0.0263788	-0.0245056	-0.0303203	-0.0337288	-0.0321811	-0.0381504		F	11	0.104616	0.107132	0.102695	0.100112	0.102484	-0.000142151	0
F	12	Sample X132	4563	4646	4579	4574	4546	4484				0.0193786	0.0285078	0.0211313	0.0205832	0.0175201	0.0107744		F	12	0.0678274	0.0773619	0.0776515	0.0718656	0.0538224	-0.000933671	0
F	13	Sample X133	3657	3439	3486	3467	3438	3415				-0.0746059	-0.095777	-0.091257	-0.0930872	-0.0958729	-0.0980758		F	13	0.0563887	0.035861	0.0417581	0.0407531	0.0387917	-0.00117313	0
F	14	Sample X134	4431	4148	3955	3995	3963	4017				0.00504783	-0.0249222	-0.0447921	-0.0407109	-0.0439774	-0.0384581		F	14	0.0534966	0.023932	0.0117281	0.0105714	-0.00767511	-0.00407812	0
F	15	Sample X135	4444	4340	4288	4195	4195	4151				0.00644909	-0.0046999	-0.0102225	-0.0200145	-0.0200145	-0.0246098		F	15	0.137444	0.126938	0.122793	0.113826	0.11465	-0.00151957	0
F	16	Sample X136	4763	4640	4574	4561	4535	4520				0.0415346	0.0278447	0.0205832	0.0191598	0.0163196	0.0146851		F	16	0.0899834	0.0766989	0.0771034	0.0704421	0.0526219	-0.00249077	0
F	17	Sample X137	4406	4516	4425	4493	4479	4418				0.00235927	0.0142498	0.00440184	0.0117505	0.0102326	0.00364877		F	17	0.133354	0.145888	0.137417	0.145591	0.144897	0.000769561	0
F	18	Sample X138	4637	4817	4695	4720	4725	4689				0.0275134	0.0476103	0.0339408	0.0367252	0.0372832	0.0332737		F	18	0.0759622	0.0964644	0.0904609	0.0880076	0.0735854	-0.000158454	0
F	19	Sample X139	3300	3248	3230	3197	3188	3236				-0.109005	-0.1139	-0.115588	-0.118673	-0.119513	-0.115026		F	19	0.02199	0.0177381	0.0174274	0.0151669	0.0151517	-0.000455889	0
F	20	Sample X140	4450	4368	4411	4406	4389	4397				0.00709656	-0.00171192	0.00289633	0.00235927	0.00053565	0.00139336		F	20	0.0555454	0.0471422	0.0594165	0.0536416	0.0368379	-0.00124717	0
F	21	Sample X141	3507	3580	3507	3500	3501	3534				-0.0892297	-0.0821441	-0.0892297	-0.089906	-0.0898094	-0.0866159		F	21	0.041765	0.0494939	0.0437855	0.0439343	0.0448553	0.000206021	0
F	22	Sample X142	4606	4723	4608	4621	4652	4599				0.0240967	0.03706	0.0243167	0.0257483	0.0291713	0.023327		F	22	0.0725455	0.0859141	0.0808369	0.0770307	0.0654735	-0.000471464	0
F	23	Sample X143	3064	3057	3042	3033	3024	3036				-0.130995	-0.131638	-0.133015	-0.13384	-0.134665	-0.133565		F	23	0	0	0	0	0	0	0
F	24	Sample X144	3919	3915	3839	3891	4038	3922				-0.0484488	-0.0488542	-0.0565202	-0.0512823	-0.0363022	-0.0481447		F	24	0	0	0	0	0	0	0
G	1	Sample X145	8767	9374	9751	10227	10807	11277				0.636898	0.762794	0.847796	0.963577	1.1192	1.25885		G	1	0.660257	0.780502	0.87511	0.993276	1.14724	0.0324654	0
G	2	Sample X146	10807	13308	15178	16693	17896	18795				1.1192	2.05726	3.28066	5.04166	7.64467	11.4023		G	2	1.07519	1.88227	3.14142	4.89656	7.53557	0.430692	0
G	3	Sample X147	6546	7030	7567	7988	8500	8920				0.266058	0.33686	0.421363	0.49247	0.585376	0.667444		G	3	0.289417	0.354568	0.448677	0.522169	0.613417	0.0216	0
G	4	Sample X148	7569	9298	9886	10801	11951	12798				0.42169	0.746319	0.87963	1.1175	1.4843	1.81982		G	4	0.377685	0.571335	0.740395	0.972395	1.3752	0.0665009	0
G	5	Sample X149	6009	6656	7257	7810	8323	8819				0.192835	0.281731	0.371778	0.461854	0.552413	0.647194		G	5	0.216194	0.299439	0.399092	0.491553	0.580454	0.024284	0
G	6	Sample X150	7391	8326	9290	10180	11031	11755				0.392935	0.552964	0.744597	0.951693	1.18412	1.41537		G	6	0.34893	0.37798	0.605363	0.806591	1.07502	0.0484062	0
G	7	Sample X151	5855	6499	7046	7556	8092	8561				0.172791	0.259433	0.339284	0.419564	0.510748	0.596953		G	7	0.19615	0.277141	0.366598	0.449263	0.538788	0.0228425	0
G	8	Sample X152	6779	7308	7823	8329	8837	9301				0.299543	0.379782	0.464062	0.553516	0.650778	0.746966		G	8	0.255538	0.204798	0.324827	0.408413	0.54168	0.0190762	0
G	9	Sample X153	5701	6100	6611	6982	7439	7894				0.15315	0.204873	0.275291	0.32962	0.400615	0.476199		G	9	0.176508	0.222581	0.302604	0.35932	0.428656	0.0168098	0
G	10	Sample X154	5446	5720	5993	6205	6417	6677				0.121478	0.155551	0.190733	0.218947	0.247978	0.284751		G	10	0.0774734	-0.0194324	0.0514986	0.0738447	0.13888	0.00409376	0
G	11	Sample X155	5504	5860	6161	6420	6773	7134				0.128591	0.173436	0.213025	0.248395	0.298667	0.352716		G	11	0.15195	0.191143	0.240339	0.278094	0.326707	0.0116505	0
G	12	Sample X156	5693	6124	6169	6290	6323	6417				0.15214	0.208073	0.214099	0.230486	0.235002	0.247978		G	12	0.108135	0.0330888	0.0748644	0.0853842	0.125905	0.00118464	0
G	13	Sample X157	4143	4344	4580	4824	5051	5259				-0.0254427	-0.00427366	0.021241	0.0484008	0.0744122	0.0989029		G	13	-0.0020838	0.0134343	0.0485549	0.0780999	0.102453	0.0069691	0
G	14	Sample X158	5493	4929	5263	5412	5007	4838				0.127238	0.0603415	0.0993802	0.117334	0.0693128	0.049984		G	14	0.0832328	-0.114642	-0.0398546	-0.0277686	-0.039785	-0.00820119	0
G	15	Sample X159	4565	4660	4887	4752	4864	4970				0.0195975	0.0300567	0.0555466	0.0403019	0.0529314	0.0650463		G	15	0.0429564	0.0477647	0.0828605	0.070001	0.0809719	0.00253436	0
G	16	Sample X160	5578	5655	5589	5599	5582	5572				0.137743	0.147359	0.13911	0.140356	0.13824	0.136997		G	16	0.0937375	-0.0276251	-0.000124449	-0.00474656	0.0291419	-0.00430638	0
G	17	Sample X161	4771	4945	4957	5056	5095	5205				0.0424321	0.0621747	0.0635519	0.0749934	0.0795397	0.092483		G	17	0.065791	0.0798826	0.0908658	0.104693	0.10758	0.00278594	0
G	18	Sample X162	5727	5786	5704	5739	5771	5777				0.156438	0.163942	0.153528	0.157959	0.162028	0.162793		G	18	0.112433	-0.0110422	0.0142935	0.0128573	0.0529306	-0.00396682	0
G	19	Sample X163	6318	6396	6487	6531	6619	6659				0.234317	0.245064	0.257749	0.263939	0.276433	0.282162		G	19	0.257676	0.262772	0.285063	0.293638	0.304473	0.00311982	0
G	20	Sample X164	5660	5991	5433	5746	6070	6124				0.147986	0.190471	0.119891	0.158848	0.200888	0.208073		G	20	0.103982	0.0154873	-0.0193434	0.0137459	0.0917906	-0.000812727	0
G	21	Sample X165	5072	5024	4893	5019	5024	5093				0.0768559	0.0712797	0.05623	0.0707008	0.0712797	0.079306		G	21	0.100215	0.0889876	0.0835439	0.1004	0.0993202	-5.96359e-05	0
G	22	Sample X166	5551	6490	6358	6219	6274	6148				0.134393	0.25817	0.239814	0.220838	0.228304	0.211282		G	22	0.0903882	0.0831859	0.100579	0.0757362	0.119206	0.0019212	0
G	23	Sample X167	4163	4217	4125	4102	4118	4139				-0.0233589	-0.0177079	-0.0273139	-0.0296991	-0.0280405	-0.0258589		G	23	0	0	0	0	0	0	0
G	24	Sample X168	4785	5872	5590	5637	5344	5793				0.044005	0.174984	0.139235	0.145102	0.109098	0.164836		G	24	0	0	0	0	0	0	0
H	1	Sample X169	7450	7404	7274	7285	7377	7463				0.402383	0.39501	0.374439	0.376165	0.390705	0.404476		H	1	0.543522	0.561194	0.542998	0.541291	0.558034	0.000967463	0
H	2	Sample X170	6822	8091	9176	9912	10634	11120				0.305842	0.510571	0.720313	0.88585	1.07097	1.21073		H	2	0.440965	0.645693	0.861362	1.03043	1.21437	0.0515605	0
H	3	Sample X171	5842	5945	6472	5992	6028	6165				0.171118	0.184456	0.255647	0.190602	0.195336	0.213562		H	3	0.312257	0.35064	0.424206	0.355729	0.362665	0.00336055	0
H	4	Sample X172	4987	5860	6671	7369	7929	8408				0.0670042	0.173436	0.283887	0.389433	0.48223	0.568128		H	4	0.202126	0.308558	0.424935	0.534017	0.625637	0.028234	0
H	5	Sample X173	5014	5000	4959	5016	4986	5029				0.0701222	0.0685041	0.0637817	0.0703536	0.0668889	0.071859		H	5	0.211261	0.234688	0.232341	0.23548	0.234217	0.00153041	0
H	6	Sample X174	4772	5513	6225	6759	7318	7739				0.0425444	0.129699	0.22165	0.296626	0.381358	0.44987		H	6	0.177667	0.264821	0.362698	0.441209	0.524765	0.0231399	0
H	7	Sample X175	4616	4534	4610	4592	4600	4582				0.0251974	0.0162106	0.0245368	0.0225579	0.0234369	0.0214603		H	7	0.166337	0.182395	0.193096	0.187684	0.190765	0.0016286	0
H	8	Sample X176	4516	5054	5306	5669	6117	6430				0.0142498	0.0747609	0.104527	0.149117	0.207138	0.249785		H	8	0.149372	0.209883	0.245575	0.293701	0.350545	0.0134115	0
H	9	Sample X177	3853	3795	3690	3646	3692	3689				-0.0551131	-0.0609275	-0.0713548	-0.0756869	-0.0711573	-0.0714535		H	9	0.086026	0.105257	0.0972043	0.0894397	0.0961713	0.000676352	0
H	10	Sample X178	3698	3874	4043	4120	4348	4493				-0.0705647	-0.0529982	-0.0357882	-0.027833	-0.00384721	0.0117505		H	10	0.0645575	0.0821241	0.10526	0.11675	0.13956	0.00500013	0
H	11	Sample X179	4939	4926	4996	4938	4949	4881				0.0614868	0.0599981	0.0680424	0.0613722	0.0626335	0.0548636		H	11	0.202626	0.226182	0.236601	0.226499	0.229962	0.00182242	0
H	12	Sample X180	3447	3503	3620	3673	3828	3920				-0.0950094	-0.0896162	-0.0782365	-0.0730311	-0.0576241	-0.0483474		H	12	0.0401129	0.0455061	0.0628118	0.0715523	0.0857826	0.00304465	0
H	13	Sample X181	1789	1752	1691	1637	1625	1648				-0.240477	-0.243439	-0.248296	-0.25257	-0.253517	-0.251701		H	13	-0.0993383	-0.0772542	-0.0797366	-0.0874435	-0.0861881	0.00087668	0
H	14	Sample X182	3370	2955	3075	3108	3086	3155				-0.102369	-0.140957	-0.129982	-0.126939	-0.128969	-0.122584		H	14	0.0327531	-0.00583511	0.0110658	0.0176448	0.0144376	-0.00122103	0
H	15	Sample X183	74	74	74	75	74	75				-0.366752	-0.366752	-0.366752	-0.366684	-0.366752	-0.366684		H	15	-0.225613	-0.200567	-0.198193	-0.201557	-0.199423	0.00174597	1
H	16	Sample X184	3518	3606	3645	3597	3618	3623				-0.0881657	-0.0796062	-0.0757851	-0.0804856	-0.0784323	-0.0779427		H	16	0.0469565	0.0555161	0.0652632	0.0640979	0.0649744	0.00120119	0
H	17	Sample X185	72	74	73	70	76	76				-0.366887	-0.366752	-0.366819	-0.367022	-0.366616	-0.366616		H	17	-0.225748	-0.200567	-0.19826	-0.201895	-0.199288	0.001764	1
H	18	Sample X186	3407	3395	3366	3395	3369	3367				-0.0988407	-0.0999867	-0.10275	-0.0999867	-0.102464	-0.102655		H	18	0.0362816	0.0351356	0.0382985	0.0445967	0.0409424	0.000310717	0
H	19	Sample X187	75	76	75	76	76	76				-0.366684	-0.366616	-0.366684	-0.366616	-0.366616	-0.366616		H	19	-0.225545	-0.200432	-0.198125	-0.20149	-0.199288	0.00175048	1
H	20	Sample X188	3757	3468	3371	3657	3559	3431				-0.0647158	-0.092991	-0.102274	-0.0746059	-0.0841885	-0.096544		H	20	0.0704065	0.0421313	0.0387742	0.0699775	0.0592182	-0.000745883	0
H	21	Sample X189	3193	3045	2993	3231	2928	3367				-0.119047	-0.13274	-0.137498	-0.115494	-0.143407	-0.102655		H	21	0.0220924	0.0334444	0.0310613	0.0496325	0.0239219	0.000121962	0
H	22	Sample X190	3264	3334	3390	3241	3229	3236				-0.112397	-0.105788	-0.100464	-0.114557	-0.115681	-0.115026		H	22	0.0227256	0.0293341	0.0405845	0.0300267	0.0277253	0.000333311	0
H	23	Sample X191	2953	2673	2646	2685	2660	2649				-0.141139	-0.166184	-0.168559	-0.165127	-0.167329	-0.168296		H	23	0	0	0	0	0	0	0
H	24	Sample X192	3019	3019	2954	2915	2928	2921				-0.135122	-0.135122	-0.141048	-0.144583	-0.143407	-0.144041		H	24	0	0	0	0	0	0	0
I	1	Sample X193	10225	12080	13875	15352	16755	18018				0.963069	1.53131	2.36085	3.43532	5.14019	8.02397		I	1	0.821342	1.40603	2.23876	3.31567	5.01638	0.279669	0
I	2	Sample X194	7541	10089	11894	13378	14545	15533				0.417117	0.928975	1.46395	2.09231	2.78779	3.60655		I	2	0.438596	0.959606	1.45035	2.13425	2.815	0.158427	0
I	3	Sample X195	8208	9654	10985	12240	13423	14593				0.531483	0.825388	1.17055	1.59153	2.11518	2.82178		I	3	0.389756	0.700115	1.04846	1.47188	1.99138	0.106775	0
I	4	Sample X196	5660	7153	8383	9367	10179	11074				0.147986	0.355639	0.563484	0.761268	0.951442	1.19692		I	4	0.169466	0.386269	0.549887	0.803205	0.978652	0.0539457	0
I	5	Sample X197	8614	10129	11472	12650	13900	15054				0.607104	0.938915	1.32081	1.75632	2.37534	3.17591		I	5	0.465377	0.813641	1.19872	1.63667	2.25154	0.119077	0
I	6	Sample X198	5439	6572	7504	8276	9130	9917				0.120624	0.269741	0.411102	0.543814	0.710646	0.887049		I	6	0.142103	0.300372	0.397505	0.585751	0.737856	0.0397169	0
I	7	Sample X199	9011	10462	11831	13057	14269	15562				0.68598	1.02458	1.44175	1.93662	2.6017	3.63504		I	7	0.544252	0.899302	1.31966	1.81697	2.4779	0.12891	0
I	8	Sample X200	5532	6343	6720	7309	7930	8474				0.132043	0.237749	0.290961	0.379939	0.482403	0.580476		I	8	0.153523	0.26838	0.277364	0.421876	0.509613	0.0237394	0
I	9	Sample X201	7427	8456	9314	10253	11221	12059				0.39869	0.577096	0.74977	0.970195	1.24151	1.52356		I	9	0.256963	0.451822	0.627681	0.850547	1.11771	0.057383	0
I	10	Sample X202	4812	4989	5135	5399	5682	6009				0.047046	0.0672348	0.0842256	0.115754	0.150753	0.192835		I	10	0.0685253	0.0978655	0.0706285	0.157691	0.177964	0.00729588	0
I	11	Sample X203	7494	8620	9244	9891	10714	11436				0.409482	0.608258	0.734742	0.880824	1.09307	1.30919		I	11	0.267755	0.482985	0.612653	0.761176	0.969266	0.0467674	0
I	12	Sample X204	4954	4924	5129	5327	5490	5667				0.0632074	0.0597693	0.0835212	0.10705	0.126869	0.148866		I	12	0.0846867	0.0904	0.0699241	0.148987	0.154079	0.00462616	0
I	13	Sample X205	7211	7922	8075	8500	9222	9693				0.364609	0.481021	0.50774	0.585376	0.730056	0.834352		I	13	0.222882	0.355748	0.385651	0.465729	0.606253	0.0255581	0
I	14	Sample X206	4623	4397	4565	4480	4543	4780				0.0259688	0.00139336	0.0195975	0.010341	0.0171926	0.0434429		I	14	0.047448	0.032024	0.00600042	0.0522782	0.0444026	-0.000203027	0
I	15	Sample X207	6929	7361	7356	7738	8121	8571				0.321684	0.388163	0.387369	0.449703	0.515897	0.598862		I	15	0.179957	0.262889	0.26528	0.330055	0.392094	0.0141425	0
I	16	Sample X208	5144	5096	5024	5075	5159	5324				0.0852832	0.0796565	0.0712797	0.0772055	0.0870485	0.106689		I	16	0.106762	0.110287	0.0576826	0.119143	0.114259	0.00049974	0
I	17	Sample X209	7148	7577	7479	7550	7946	8019				0.354869	0.423	0.407057	0.418585	0.485171	0.497888		I	17	0.213142	0.297727	0.284967	0.298937	0.361369	0.00988182	0
I	18	Sample X210	5510	5356	5522	5469	5503	5555				0.12933	0.110546	0.130809	0.124292	0.128468	0.134889		I	18	0.150809	0.141177	0.117212	0.16623	0.155678	0.000324595	0
I	19	Sample X211	6152	6460	6226	6329	6516	6603				0.211818	0.253969	0.221785	0.235826	0.261825	0.27415		I	19	0.070091	0.128696	0.0996961	0.116178	0.138022	0.00452874	0
I	20	Sample X212	5692	4724	4715	5010	4773	4792				0.152014	0.0371716	0.0361677	0.0696596	0.0426567	0.0447924		I	20	0.173493	0.0678022	0.0225705	0.111597	0.0698667	-0.00690842	0
I	21	Sample X213	6811	6797	6572	7069	6456	7024				0.304227	0.302175	0.269741	0.342778	0.25341	0.335952		I	21	0.1625	0.176902	0.147652	0.223131	0.129608	-0.00219282	0
I	22	Sample X214	5671	5459	4955	4593	5002	5575				0.149369	0.123068	0.0633223	0.0226677	0.0687351	0.13737		I	22	0.170848	0.153699	0.0497251	0.064605	0.0959452	-0.00499354	0
I	23	Sample X215	5610	5477	5451	5431	5465	5523				0.141727	0.125273	0.122089	0.119648	0.123802	0.130932		I	23	0	0	0	0	0	0	0
I	24	Sample X216	4181	4093	4510	3983	4126	4029				-0.0214793	-0.0306307	0.0135971	-0.0419373	-0.02721	-0.0372268		I	24	0	0	0	0	0	0	0
J	1	Sample X217	6971	7507	7935	8216	8567	9021				0.327968	0.411589	0.483267	0.532927	0.598098	0.688034		J	1	0.692824	0.776445	0.848395	0.897851	0.962683	0.0179906	0
J	2	Sample X218	3607	3716	3859	3898	3917	3951				-0.0795084	-0.0687845	-0.0545094	-0.0505748	-0.0486515	-0.0451991		J	2	0.0798648	0.0880086	0.109911	0.115345	0.115769	0.00239362	0
J	3	Sample X219	5382	5718	6107	6419	6694	7134				0.113691	0.155298	0.205805	0.248256	0.287201	0.352716		J	3	0.478547	0.520154	0.570933	0.613179	0.651786	0.0115493	0
J	4	Sample X220	2810	2935	2977	3009	3077	3199				-0.154026	-0.142772	-0.138956	-0.136037	-0.129798	-0.118487		J	4	0.00534716	0.0140208	0.0254645	0.0298833	0.0346224	0.00195168	0
J	5	Sample X221	5669	6114	6481	6812	7222	7635				0.149117	0.206738	0.256908	0.304374	0.366319	0.432546		J	5	0.513974	0.571594	0.622035	0.669298	0.730904	0.014462	0
J	6	Sample X222	2437	2498	2488	2512	2541	2612				-0.186709	-0.181454	-0.182318	-0.180243	-0.177729	-0.17154		J	6	-0.0273354	-0.0246605	-0.0178968	-0.0143227	-0.0133078	0.000935171	0
J	7	Sample X223	5572	5968	6266	6634	7032	7436				0.136997	0.187459	0.227215	0.278577	0.337162	0.400134		J	7	0.501853	0.552315	0.592342	0.643501	0.701747	0.0133263	0
J	8	Sample X224	2779	2821	2685	2735	2793	2808				-0.156793	-0.153042	-0.165127	-0.160705	-0.155545	-0.154205		J	8	0.00258008	0.00375122	-0.000705904	0.00521542	0.008876	0.000419728	0
J	9	Sample X225	4727	5020	5239	5512	5847	6132				0.0375064	0.0708165	0.09652	0.129576	0.171761	0.209141		J	9	0.402363	0.435673	0.461647	0.4945	0.536346	0.00893223	0
J	10	Sample X226	2827	2883	2736	2748	2791	2828				-0.152505	-0.147473	-0.160616	-0.159551	-0.155723	-0.152415		J	10	0.00686859	0.00932043	0.0038048	0.00636911	0.00869752	0.000121929	0
J	11	Sample X227	5859	6008	6247	6532	6775	7055				0.173307	0.192704	0.224632	0.26408	0.298959	0.34065		J	11	0.538163	0.55756	0.589759	0.629004	0.663544	0.00835872	0
J	12	Sample X228	3230	3059	3098	3107	3112	3123				-0.115588	-0.131454	-0.127862	-0.127031	-0.126569	-0.125551		J	12	0.0437855	0.0253389	0.0365585	0.038889	0.0378518	-0.000395581	0
J	13	Sample X229	5095	4933	5174	5278	5420	5708				0.0795397	0.0607994	0.0888172	0.101172	0.118307	0.154034		J	13	0.444396	0.425655	0.453944	0.466096	0.482892	0.00256642	0
J	14	Sample X230	2842	2683	2712	2695	2684	2756				-0.15116	-0.165303	-0.162742	-0.164244	-0.165215	-0.15884		J	14	0.00821339	-0.00850979	0.00167899	0.00167588	-0.000794099	-0.000600499	0
J	15	Sample X231	5560	5529	5729	5841	5990	6137				0.135508	0.131673	0.156691	0.170989	0.19034	0.20981		J	15	0.500364	0.496529	0.521819	0.535913	0.554925	0.00363736	0
J	16	Sample X232	3083	2974	3004	2979	2997	2999				-0.129246	-0.139229	-0.136494	-0.138774	-0.137133	-0.13695		J	16	0.0301277	0.0175638	0.0279271	0.0271459	0.0272879	-0.000189316	0
J	17	Sample X233	5578	5518	5566	5741	5769	5822				0.137743	0.130315	0.136253	0.158213	0.161774	0.168549		J	17	0.502599	0.495172	0.50138	0.523137	0.526359	0.00158399	0
J	18	Sample X234	3622	3494	3634	3532	3521	3594				-0.0780406	-0.0904853	-0.0768646	-0.0868097	-0.0878754	-0.0807785		J	18	0.0813326	0.0663079	0.0875561	0.0791103	0.0765453	-0.000319154	0
J	19	Sample X235	5181	5273	5160	5239	5305	5310				0.0896437	0.100575	0.0871663	0.09652	0.104407	0.105007		J	19	0.4545	0.465431	0.452294	0.461444	0.468991	0.000966109	0
J	20	Sample X236	2648	2576	2463	2498	2518	2480				-0.168383	-0.174684	-0.184473	-0.181454	-0.179723	-0.183008		J	20	-0.00901016	-0.0178904	-0.0200524	-0.0155337	-0.0153025	-0.00041949	0
J	21	Sample X237	6045	7122	6756	6774	6912	6524				0.19758	0.350874	0.296189	0.298813	0.319151	0.262952		J	21	0.562436	0.715731	0.661316	0.663737	0.683736	0.00808667	0
J	22	Sample X238	3218	3134	3137	3094	3069	3099				-0.116711	-0.124533	-0.124254	-0.128231	-0.130535	-0.12777		J	22	0.0426621	0.0322606	0.0401662	0.0376887	0.033886	-0.000585075	0
J	23	Sample X239	102	102	98	101	106	102				-0.364856	-0.364856	-0.365127	-0.364924	-0.364585	-0.364856		J	23	0	0	0	0	0	0	1
J	24	Sample X240	2750	2779	2693	2676	2693	2691				-0.159373	-0.156793	-0.164421	-0.16592	-0.164421	-0.164597		J	24	0	0	0	0	0	0	0
K	1	Sample X241	6765	7073	7352	7597	7854	8143				0.2975	0.343387	0.386735	0.426283	0.469345	0.519818		K	1	0.176632	0.22581	0.283527	0.317064	0.359886	0.0122169	0
K	2	Sample X242	5582	5886	6154	6450	6706	7080				0.13824	0.176793	0.212086	0.252572	0.288935	0.344454		K	2	0.0721574	0.150604	0.2488	0.289183	0.330974	0.0172545	0
K	3	Sample X243	5312	5569	5784	5978	6277	6584				0.105247	0.136625	0.163686	0.188767	0.228713	0.271445		K	3	-0.0156209	0.0190479	0.060479	0.0795489	0.119253	0.00899161	0
K	4	Sample X244	4360	4480	4693	4825	5096	5284				-0.00256665	0.010341	0.0337184	0.0485138	0.0796565	0.10189		K	4	-0.068649	-0.0158483	0.0704317	0.0851243	0.121696	0.0126897	0
K	5	Sample X245	5649	5883	6016	6366	6721	7043				0.146606	0.176405	0.193756	0.240917	0.291106	0.338829		K	5	0.0257382	0.0588284	0.0905486	0.131699	0.181646	0.0103939	0
K	6	Sample X246	5047	5206	5166	5354	5500	5686				0.0739475	0.0926015	0.0878735	0.110305	0.128099	0.151257		K	6	0.00786513	0.0664122	0.124587	0.146915	0.170138	0.0108182	0
K	7	Sample X247	5916	6192	6310	6552	6883	7187				0.180682	0.217194	0.233221	0.266907	0.314844	0.360888		K	7	0.0598142	0.0996167	0.130014	0.157688	0.205385	0.0097047	0
K	8	Sample X248	5239	5322	5216	5238	5369	5502				0.09652	0.106449	0.0937872	0.0964011	0.112117	0.128345		K	8	0.0304377	0.0802593	0.1305	0.133012	0.154157	0.00824794	0
K	9	Sample X249	5170	5433	5428	5623	5840	6004				0.0883452	0.119891	0.119282	0.143351	0.170861	0.192178		K	9	-0.0325225	0.00231457	0.0160745	0.0341323	0.0614009	0.00626156	0
K	10	Sample X250	4250	4379	4183	4286	4333	4368				-0.0142367	-0.000535329	-0.0212702	-0.0104342	-0.00544533	-0.00171192		K	10	-0.080319	-0.0267246	0.0154431	0.0261763	0.036594	0.0077942	0
K	11	Sample X251	5624	5899	5995	6145	6244	6362				0.143476	0.178476	0.190996	0.210881	0.224225	0.240366		K	11	0.022608	0.0608995	0.0877886	0.101662	0.114765	0.00614382	0
K	12	Sample X252	5071	4673	4618	4691	4698	4767				0.0767394	0.0314974	0.0254178	0.033496	0.0342744	0.0419832		K	12	0.010657	0.00530816	0.062131	0.0701066	0.0763138	0.00437712	0
K	13	Sample X253	5968	5040	5039	5021	5145	5286				0.187459	0.0731347	0.0730187	0.0709323	0.0854008	0.102129		K	13	0.066591	-0.0444422	-0.0301887	-0.0382861	-0.0240589	-0.00604333	0
K	14	Sample X254	4565	3936	3840	3836	3801	3860				0.0195975	-0.0467239	-0.0564197	-0.0568214	-0.0603278	-0.0544087		K	14	-0.0464848	-0.0729132	-0.0197064	-0.0202108	-0.0182885	0.00187975	0
K	15	Sample X255	5533	5437	5585	5587	5471	5512				0.132167	0.120379	0.138613	0.138862	0.124538	0.129576		K	15	0.0112991	0.00280257	0.0354054	0.0296431	0.0150779	0.000251915	0
K	16	Sample X256	5045	4872	4769	4758	4826	4824				0.0737152	0.0538402	0.0422077	0.040974	0.0486268	0.0484008		K	16	0.00763285	0.0276509	0.0789209	0.0775846	0.0906662	0.00553556	0
K	17	Sample X257	6381	5885	6726	6663	6347	6432				0.242989	0.176664	0.29183	0.282737	0.238299	0.250064		K	17	0.122121	0.059087	0.188623	0.173518	0.12884	0.000447914	0
K	18	Sample X258	5047	5060	5016	4976	5002	4983				0.0739475	0.0754587	0.0703536	0.0657369	0.0687351	0.0665431		K	18	0.00786513	0.0492694	0.107067	0.102347	0.110774	0.00686062	0
K	19	Sample X259	5394	5468	5307	5274	5341	5433				0.115147	0.12417	0.104647	0.100694	0.108736	0.119891		K	19	-0.00572113	0.00659303	0.00143918	-0.0085244	-0.000723536	0.000333173	0
K	20	Sample X260	5041	4519	4539	4428	4389	4540				0.0732508	0.0145763	0.016756	0.00472478	0.00053565	0.0168651		K	20	0.00716846	-0.011613	0.0534693	0.0413353	0.042575	0.00236044	0
K	21	Sample X261	5062	5538	5031	4943	4942	4962				0.0756914	0.132785	0.0720908	0.0619453	0.0618307	0.0641264		K	21	-0.0451763	0.0152079	-0.0311165	-0.0472731	-0.047629	-0.000163516	0
K	22	Sample X262	5467	5436	5307	5682	5722	5616				0.124047	0.120257	0.104647	0.150753	0.155805	0.142476		K	22	0.0579651	0.0940682	0.14136	0.187364	0.197844	0.00932526	0
K	23	Sample X263	5441	5414	5295	5345	5347	5385				0.120868	0.117577	0.103207	0.109218	0.10946	0.114055		K	23	0	0	0	0	0	0	0
K	24	Sample X264	4979	4625	4034	4035	3982	4023				0.0660823	0.0261893	-0.0367133	-0.0366105	-0.0420394	-0.0378427		K	24	0	0	0	0	0	0	0
L	1	Sample X265	7050	7610	8185	8657	9201	9865				0.339891	0.428421	0.527342	0.615403	0.725599	0.874628		L	1	0.196165	0.281941	0.375707	0.461622	0.567132	0.0247311	0
L	2	Sample X266	8040	10298	11834	12956	13693	14474				0.501573	0.981725	1.4428	1.89018	2.2583	2.73843		L	2	0.577848	1.05663	1.52426	1.97651	2.34258	0.117649	0
L	3	Sample X267	5686	6142	6655	7124	7596	8109				0.151257	0.210479	0.281588	0.351181	0.426118	0.513763		L	3	0.00753163	0.0639983	0.129952	0.1974	0.267651	0.0173413	0
L	4	Sample X268	5954	7589	8720	9653	10483	11313				0.18563	0.424968	0.627667	0.825159	1.03016	1.2701		L	4	0.261906	0.499869	0.709128	0.911484	1.11444	0.0568359	0
L	5	Sample X269	6063	6563	7029	7622	8191	8722				0.199961	0.268465	0.336708	0.430399	0.528421	0.628058		L	5	0.0562352	0.121984	0.185073	0.276618	0.369954	0.0209146	0
L	6	Sample X270	6256	7651	8830	9989	11007	11816				0.225855	0.435194	0.649383	0.904441	1.17703	1.4365		L	6	0.302131	0.510095	0.730845	0.990766	1.26131	0.0639454	0
L	7	Sample X271	6372	6918	7368	7907	8495	8988				0.241745	0.320045	0.389274	0.478435	0.584433	0.681268		L	7	0.0980196	0.173564	0.237639	0.324654	0.425965	0.0218631	0
L	8	Sample X272	5643	6532	7307	8106	8802	9457				0.145854	0.26408	0.379624	0.513231	0.643818	0.781034		L	8	0.22213	0.338981	0.461086	0.599556	0.728104	0.0337316	0
L	9	Sample X273	5260	5689	5981	6389	6871	7230				0.0990222	0.151636	0.18916	0.244095	0.313067	0.367565		L	9	-0.0447035	0.00515497	0.0375247	0.0903142	0.1546	0.0132869	0
L	10	Sample X274	4395	4749	5147	5510	5835	6179				0.00117885	0.039966	0.085636	0.12933	0.170218	0.215443		L	10	0.0774548	0.114867	0.167098	0.215654	0.254504	0.0118033	0
L	11	Sample X275	6087	6312	6520	6878	7217	7608				0.203145	0.233495	0.262388	0.314104	0.365542	0.428092		L	11	0.0594188	0.0870143	0.110752	0.160323	0.207075	0.00984372	0
L	12	Sample X276	4405	4415	4764	4982	5209	5449				0.00225189	0.00332622	0.0416467	0.0664279	0.092957	0.121845		L	12	0.0785278	0.0782271	0.123108	0.152753	0.177243	0.00658099	0
L	13	Sample X277	4930	5041	5182	5479	5641	5838				0.0604559	0.0732508	0.0897618	0.125519	0.145603	0.170603		L	13	-0.0832698	-0.0732298	-0.0618737	-0.0282625	-0.012864	0.00469373	0
L	14	Sample X278	3582	3536	3601	3709	3855	3899				-0.0819492	-0.0864219	-0.0800948	-0.0694773	-0.0549119	-0.0504737		L	14	-0.00567325	-0.0115211	0.00136674	0.0168477	0.0293738	0.00233647	0
L	15	Sample X279	5486	5625	5679	5827	5953	6102				0.126378	0.143601	0.150376	0.16919	0.185499	0.205139		L	15	-0.017348	-0.00287982	-0.00125985	0.0154094	0.0270319	0.00295866	0
L	16	Sample X280	4069	4005	4089	4187	4254	4281				-0.0331101	-0.0396876	-0.0310444	-0.0208518	-0.013815	-0.0109633		L	16	0.0431659	0.0352132	0.0504172	0.0654731	0.0704707	0.00182033	0
L	17	Sample X281	5904	5898	6038	6025	6089	6187				0.179125	0.178347	0.196656	0.194941	0.20341	0.21652		L	17	0.0353988	0.0318663	0.04502	0.0411601	0.0449432	0.00063629	0
L	18	Sample X282	4070	4086	4186	4199	4215	4279				-0.0330069	-0.0313546	-0.0209564	-0.0195956	-0.0179179	-0.0111749		L	18	0.043269	0.0435463	0.0605052	0.0667293	0.0663679	0.00153992	0
L	19	Sample X283	3802	3812	3847	3786	3646	3759				-0.0602278	-0.0592273	-0.0557164	-0.0618262	-0.0756869	-0.0645168		L	19	-0.203954	-0.205708	-0.207352	-0.215607	-0.234154	-0.00201336	0
L	20	Sample X284	4462	4011	4163	3987	4024	3978				0.00839291	-0.0390731	-0.0233589	-0.0415287	-0.0377401	-0.0424477		L	20	0.0846688	0.0358278	0.0581027	0.0447963	0.0465457	-0.00254154	0
L	21	Sample X285	6005	5994	5766	6017	6184	6239				0.192309	0.190865	0.161392	0.193888	0.216116	0.223547		L	21	0.0485835	0.0443842	0.00975603	0.0401065	0.0576491	0.000604374	0
L	22	Sample X286	4066	4060	4012	3988	3964	3975				-0.0334195	-0.034038	-0.0389706	-0.0414265	-0.0438755	-0.0427539		L	22	0.0428564	0.0408628	0.042491	0.0448985	0.0404103	-0.000163078	0
L	23	Sample X287	5626	5648	5689	5706	5743	5768				0.143726	0.146481	0.151636	0.153781	0.158467	0.161646		L	23	0	0	0	0	0	0	0
L	24	Sample X288	3640	3654	3587	3537	3558	3548				-0.0762759	-0.0749008	-0.0814616	-0.0863249	-0.0842857	-0.0852574		L	24	0	0	0	0	0	0	0
M	1	Sample X289	9382	11485	13121	14437	15689	16823				0.764541	1.32504	1.96665	2.71312	3.76341	5.25156		M	1	0.716366	1.26778	1.9213	2.66438	3.71524	0.199925	0
M	2	Sample X290	6455	8304	9771	10749	11580	12234				0.25327	0.548929	0.852464	1.10285	1.35623	1.58923		M	2	0.278505	0.517875	0.757133	1.08139	1.38562	0.0738076	0
M	3	Sample X291	7112	8548	9939	11022	12049	12853				0.349342	0.594477	0.892339	1.18146	1.51989	1.84401		M	3	0.301167	0.53722	0.846984	1.13272	1.47171	0.0780363	0
M	4	Sample X292	4911	5924	6758	7532	8288	8977				0.0582835	0.181721	0.29648	0.415651	0.546003	0.679021		M	4	0.083518	0.150668	0.201149	0.39419	0.575392	0.0327916	0
M	5	Sample X293	9523	11035	12177	13359	14449	15318				0.795725	1.18531	1.56756	2.08273	2.7213	3.40436		M	5	0.74755	1.12805	1.5222	2.03399	2.67313	0.128372	0
M	6	Sample X294	5246	5980	6605	7363	8077	8659				0.0973534	0.189029	0.274435	0.38848	0.508093	0.61579		M	6	0.122588	0.157975	0.179104	0.36702	0.537482	0.0276596	0
M	7	Sample X295	8230	9810	11189	12477	13540	14445				0.535458	0.861615	1.23169	1.68486	2.17594	2.71857		M	7	0.487283	0.804358	1.18633	1.63612	2.12776	0.109365	0
M	8	Sample X296	5417	5577	5849	6348	6821	7262				0.117942	0.137618	0.172018	0.238437	0.305695	0.37256		M	8	0.143177	0.106564	0.0766876	0.216977	0.335084	0.0127938	0
M	9	Sample X297	7141	8470	9523	10514	11385	12200				0.353792	0.579724	0.795725	1.03844	1.29286	1.57627		M	9	0.305617	0.522468	0.750369	0.989701	1.24469	0.0626045	0
M	10	Sample X298	4360	4516	4640	4844	5066	5214				-0.00256665	0.0142498	0.0278447	0.0506633	0.076157	0.0935499		M	10	0.0226679	-0.0168041	-0.0674861	0.029203	0.105545	0.00552517	0
M	11	Sample X299	7032	7960	8784	9606	10447	11091				0.337162	0.487599	0.640254	0.81444	1.0206	1.20201		M	11	0.288988	0.430343	0.594899	0.765701	0.972426	0.0455626	0
M	12	Sample X300	4372	4513	4537	4661	4643	4701				-0.00128425	0.0139234	0.0165378	0.0301675	0.0281762	0.0346083		M	12	0.0239503	-0.0171305	-0.0787931	0.00870716	0.0575645	0.00224095	0
M	13	Sample X301	5569	6000	6551	7069	7523	7926				0.136625	0.191652	0.266765	0.342778	0.414187	0.481712		M	13	0.0884499	0.134396	0.22141	0.294038	0.366012	0.0185041	0
M	14	Sample X302	3648	3570	4039	3811	3759	3688				-0.0754904	-0.0831182	-0.0361994	-0.0593274	-0.0645168	-0.0715522		M	14	-0.0502559	-0.114172	-0.13153	-0.0807878	-0.0351285	0.00100849	0
M	15	Sample X303	6075	6389	6809	7191	7532	7866				0.201551	0.244095	0.303934	0.361508	0.415651	0.471397		M	15	0.153377	0.186839	0.258578	0.312768	0.367476	0.0142733	0
M	16	Sample X304	4363	4371	4308	4271	4300	4310				-0.00224622	-0.00139119	-0.00810249	-0.0120206	-0.00895111	-0.00789021		M	16	0.0229883	-0.0324451	-0.103433	-0.0334809	0.0204372	-0.000170071	0
M	17	Sample X305	5642	5818	6062	6255	6503	6680				0.145728	0.168036	0.199829	0.225719	0.259996	0.285183		M	17	0.0975536	0.11078	0.154473	0.176979	0.211821	0.0076178	0
M	18	Sample X306	4462	4365	4359	4515	4326	4316				0.00839291	-0.00203254	-0.00267344	0.014141	-0.00619013	-0.00725306		M	18	0.0336274	-0.0330864	-0.0980043	-0.00731935	0.0231982	-0.000695282	0
M	19	Sample X307	5570	5702	5703	5810	5918	6000				0.136749	0.153276	0.153402	0.167011	0.180942	0.191652		M	19	0.088574	0.0960196	0.108047	0.118271	0.132767	0.00294618	0
M	20	Sample X308	4531	4315	4329	4374	4385	4352				0.0158835	-0.00735929	-0.00587101	-0.00107034	0.000107104	-0.00342056		M	20	0.041118	-0.0384132	-0.101202	-0.0225307	0.0294955	-0.000774837	0
M	21	Sample X309	5944	6815	6221	6175	6653	6713				0.184325	0.304814	0.221109	0.214906	0.281301	0.289947		M	21	0.13615	0.247558	0.175754	0.166166	0.233126	0.00646503	0
M	22	Sample X310	4809	4359	4311	4882	4490	4874				0.0467076	-0.00267344	-0.00778405	0.0549774	0.011425	0.0540675		M	22	0.0719421	-0.0337273	-0.103115	0.0335171	0.0408134	-0.00207525	0
M	23	Sample X311	4822	4902	4797	4827	4822	4831				0.0481749	0.0572562	0.0453553	0.0487398	0.0481749	0.049192		M	23	0	0	0	0	0	0	0
M	24	Sample X312	4145	4669	5229	4582	4105	4099				-0.0252345	0.0310539	0.0953309	0.0214603	-0.0293884	-0.0300097		M	24	0	0	0	0	0	0	0
N	1	Sample X313	6789	8102	9227	10148	11092	11927				0.301004	0.512521	0.731119	0.943661	1.20231	1.4757		N	1	0.306663	0.522637	0.748302	0.949426	1.2176	0.060729	0
N	2	Sample X314	7493	9563	11143	12375	13392	14313				0.40932	0.804711	1.21768	1.64407	2.0994	2.63035		N	2	0.485596	0.878529	1.29416	1.72514	2.18057	0.112998	0
N	3	Sample X315	5648	6599	7507	8217	9033	9623				0.146481	0.27358	0.411589	0.533108	0.690503	0.818307		N	3	0.152139	0.283696	0.428771	0.538872	0.705793	0.0369103	0
N	4	Sample X316	5979	7328	8430	9381	10281	11004				0.188898	0.382937	0.57223	0.764323	0.977358	1.17614		N	4	0.265174	0.456756	0.648702	0.845394	1.05853	0.0528902	0
N	5	Sample X317	6009	7059	7969	8823	9654	10347				0.192835	0.341258	0.489163	0.647989	0.825388	0.99439		N	5	0.198493	0.351374	0.506345	0.653754	0.840678	0.0428123	0
N	6	Sample X318	5484	6386	7189	8102	8905	9612				0.126132	0.24368	0.361198	0.512521	0.664415	0.815804		N	6	0.202408	0.317499	0.43767	0.593592	0.745584	0.0362117	0
N	7	Sample X319	6885	7980	8899	9816	10725	11419				0.315141	0.491076	0.663206	0.863028	1.09613	1.30372		N	7	0.320799	0.501193	0.680388	0.868793	1.11142	0.0527084	0
N	8	Sample X320	5143	5830	6225	6775	7361	7816				0.0851656	0.169576	0.22165	0.298959	0.388163	0.462873		N	8	0.161442	0.243394	0.298122	0.38003	0.469331	0.020526	0
N	9	Sample X321	5618	6317	7103	7737	8451	9023				0.142726	0.23418	0.347965	0.449535	0.576158	0.688445		N	9	0.148384	0.244296	0.365148	0.455299	0.591448	0.0295376	0
N	10	Sample X322	3860	3972	4208	4411	4656	4843				-0.0544087	-0.0430599	-0.0186523	0.00289633	0.0296139	0.05055		N	10	0.0218672	0.030759	0.0578199	0.0839676	0.110783	0.00592771	0
N	11	Sample X323	5792	6469	7160	7780	8365	8863				0.164708	0.255227	0.356717	0.456775	0.560152	0.655974		N	11	0.170366	0.265344	0.3739	0.46254	0.575442	0.027005	0
N	12	Sample X324	4693	4913	4988	4979	5151	5339				0.0337184	0.0585119	0.0671195	0.0660823	0.0861066	0.108495		N	12	0.109994	0.132331	0.143592	0.147154	0.167275	0.00381875	0
N	13	Sample X325	4924	5308	5810	6207	6631	6961				0.0597693	0.104767	0.167011	0.219217	0.278148	0.326469		N	13	0.0654275	0.114883	0.184194	0.224981	0.293438	0.0152007	0
N	14	Sample X326	4234	4221	4298	4349	4375	4446				-0.0159214	-0.0172879	-0.00916313	-0.00374057	-0.000963361	0.00666486		N	14	0.0603545	0.056531	0.067309	0.0773307	0.0802055	0.0013234	0
N	15	Sample X327	5159	5537	5853	6144	6352	6637				0.0870485	0.132661	0.172534	0.210747	0.238988	0.279007		N	15	0.0927067	0.142778	0.189716	0.216511	0.254278	0.0107714	0
N	16	Sample X328	4599	4544	4618	4559	4582	4620				0.023327	0.0173018	0.0254178	0.018941	0.0214603	0.0256381		N	16	0.0996029	0.0911206	0.10189	0.100012	0.102629	0.000201756	0
N	17	Sample X329	5053	5261	5478	5646	5834	6018				0.0746446	0.0991415	0.125396	0.14623	0.170089	0.194019		N	17	0.0803028	0.109258	0.142579	0.151994	0.185379	0.0070051	0
N	18	Sample X330	5347	5328	5245	5218	5235	5200				0.10946	0.10717	0.0972343	0.0940245	0.0960442	0.0918907		N	18	0.185736	0.180989	0.173706	0.175096	0.177213	-0.000568168	0
N	19	Sample X331	4604	4652	4730	4750	5353	5001				0.0238767	0.0291713	0.0378414	0.0400779	0.110184	0.0686196		N	19	0.0295349	0.0392879	0.0550243	0.0458425	0.125474	0.00639593	0
N	20	Sample X332	4201	4271	4173	4140	4172	4166				-0.0193861	-0.0120206	-0.0223151	-0.0257548	-0.0224196	-0.0230459		N	20	0.0568899	0.0617983	0.054157	0.0553165	0.0587493	0.000123963	0
N	21	Sample X333	4935	4815	4742	5069	4817	4842				0.0610285	0.0473845	0.0391827	0.0765064	0.0476103	0.0504368		N	21	0.0666867	0.0575011	0.0563655	0.082271	0.0629003	-0.000252428	0
N	22	Sample X334	6183	5558	4892	6111	5349	5293				0.215982	0.13526	0.0561161	0.206338	0.109701	0.102968		N	22	0.292258	0.209079	0.132588	0.28741	0.19087	-0.00675918	0
N	23	Sample X335	4331	4289	4222	4330	4240	4241				-0.00565819	-0.0101166	-0.0171828	-0.00576461	-0.01529	-0.0151847		N	23	0	0	0	0	0	0	0
N	24	Sample X336	3640	3665	3638	3591	3590	3567				-0.0762759	-0.0738189	-0.0764722	-0.0810713	-0.0811689	-0.0834103		N	24	0	0	0	0	0	0	0
O	1	Sample X337	10358	12645	14421	15947	17289	18538				0.99725	1.75421	2.70227	4.04388	6.12319	10.0537		O	1	0.938623	1.69912	2.65195	3.99163	6.0665	0.341858	0
O	2	Sample X338	9517	12261	14058	15373	16379	17193				0.794382	1.5996	2.46934	3.45463	4.58285	5.9264		O	2	0.842831	1.65007	2.52214	3.50722	4.6086	0.251052	0
O	3	Sample X339	8117	9846	11203	12449	13516	14396				0.515185	0.870118	1.23598	1.67357	2.16332	2.68541		O	3	0.456559	0.815027	1.18565	1.62132	2.10663	0.110005	0
O	4	Sample X340	7001	8873	10293	11266	12318	13081				0.33248	0.657979	0.980439	1.25543	1.62169	1.94782		O	4	0.380929	0.708452	1.03324	1.30802	1.64744	0.0844342	0
O	5	Sample X341	9477	11149	12696	14185	15504	16442				0.785468	1.2195	1.77581	2.54803	3.57837	4.66989		O	5	0.726842	1.16441	1.72549	2.49578	3.52168	0.186323	0
O	6	Sample X342	7059	8693	9811	10820	11821	12679				0.341258	0.622396	0.86185	1.12289	1.43825	1.76858		O	6	0.389706	0.672869	0.914647	1.17548	1.464	0.0716199	0
O	7	Sample X343	8934	10858	12377	13590	14762	15689				0.670277	1.13373	1.64486	2.20248	2.94558	3.76341		O	7	0.611651	1.07864	1.59454	2.15023	2.88889	0.151816	0
O	8	Sample X344	5714	6727	7526	8168	8859	9507				0.154792	0.291975	0.414674	0.524291	0.655173	0.792148		O	8	0.203241	0.342449	0.467471	0.576886	0.680928	0.0318458	0
O	9	Sample X345	7439	8868	10018	11057	11911	12738				0.400615	0.656976	0.91151	1.19185	1.46999	1.7938		O	9	0.341989	0.601885	0.861186	1.1396	1.4133	0.0714209	0
O	10	Sample X346	4970	5367	5754	6069	6461	6798				0.0650463	0.111875	0.159865	0.200756	0.254109	0.302322		O	10	0.113495	0.162349	0.212661	0.253351	0.279863	0.0110912	0
O	11	Sample X347	7712	9015	10051	11009	11838	12586				0.445347	0.686801	0.9196	1.17762	1.4442	1.72954		O	11	0.386721	0.63171	0.869276	1.12537	1.38751	0.0667194	0
O	12	Sample X348	4957	5097	5302	5558	5782	6006				0.0635519	0.0797734	0.104047	0.13526	0.163431	0.192441		O	12	0.112001	0.130247	0.156843	0.187855	0.189186	0.00514568	0
O	13	Sample X349	6230	6939	7517	8070	8631	9145				0.222327	0.323177	0.413212	0.506857	0.610378	0.71379		O	13	0.163701	0.268086	0.362888	0.454607	0.553692	0.0259994	0
O	14	Sample X350	4175	4212	4276	4513	4419	5002				-0.0221062	-0.0182327	-0.0114921	0.0139234	0.00375631	0.0687351		O	14	0.0263426	0.032241	0.0413044	0.0665182	0.0295111	0.000211239	0
O	15	Sample X351	6541	7071	7529	8004	8488	8851				0.265351	0.343083	0.415162	0.495263	0.583112	0.653573		O	15	0.206725	0.287991	0.364839	0.443013	0.526426	0.0213134	0
O	16	Sample X352	4657	4916	4799	4673	4731	4849				0.0297246	0.0588547	0.0455805	0.0314974	0.0379531	0.0512298		O	16	0.0781734	0.109328	0.0983771	0.0840922	0.063708	-0.000964363	0
O	17	Sample X353	6502	6785	7105	7411	7621	7909				0.259855	0.30042	0.348271	0.396129	0.430234	0.47878		O	17	0.201229	0.245328	0.297947	0.343878	0.373548	0.011488	0
O	18	Sample X354	4698	4733	4611	4984	4758	4812				0.0342744	0.0381766	0.0246469	0.0666584	0.040974	0.047046		O	18	0.0827233	0.0886503	0.0774434	0.119253	0.0667289	-0.00106629	0
O	19	Sample X355	5632	5698	5794	5940	6068	6196				0.144476	0.152771	0.164964	0.183804	0.200623	0.217733		O	19	0.0858502	0.0976796	0.11464	0.131553	0.143937	0.00387248	0
O	20	Sample X356	4543	4428	4298	4428	4383	4304				0.0171926	0.00472478	-0.00916313	0.00472478	-0.000107091	-0.0085269		O	20	0.0656414	0.0551985	0.0436334	0.0573195	0.0256477	-0.00266624	0
O	21	Sample X357	5638	5744	5791	5823	5904	6031				0.145227	0.158594	0.16458	0.168677	0.179125	0.195732		O	21	0.0866013	0.103503	0.114257	0.116427	0.122439	0.00238916	0
O	22	Sample X358	4537	4684	4559	4493	4546	4789				0.0165378	0.0327183	0.018941	0.0117505	0.0175201	0.0444549		O	22	0.0649866	0.083192	0.0717375	0.0643453	0.043275	-0.00144744	0
O	23	Sample X359	4914	4883	4841	4858	4897	4882				0.0586261	0.0550912	0.0503236	0.0522504	0.056686	0.0549774		O	23	0	0	0	0	0	0	0
O	24	Sample X360	3919	3899	3876	3878	4140	4017				-0.0484488	-0.0504737	-0.0527965	-0.0525948	-0.0257548	-0.0384581		O	24	0	0	0	0	0	0	0
P	1	Sample X361	21152	20849	20696	20625	20578	20398					16	20398	18964		151.791		P	1	0	16	15813	15077	0		1			13126	#DIV/0!
P	2	Sample X362	18972	19023	18907	18967	18996	18964									16.4054		P	2	0	0	0	0	0
P	3	Sample X363	18181	17955	17993	17934	17854	17860					8	17860	15425		9.03944		P	3	0	8	13275	11538	0		0.5			11097.7	#DIV/0!
P	4	Sample X364	15522	15516	15490	15496	15389	15425									3.92271		P	4	0	0	0	0	0
P	5	Sample X365	18486	18413	18414	18435	18425	18375					4	18375	14996		11.5622		P	5	0	4	13790	11109	0		0.25			11125	#DIV/0!
P	6	Sample X366	14961	14962	14999	14996	15010	14996									3.4827		P	6	0	0	0	0	0		0
P	7	Sample X367	15363	15392	15533	15459	15426	15414					2	15414	12837		3.91052		P	7	0	2	10829	8950	0		0.125			9417.67	#DIV/0!
P	8	Sample X368	13207	13003	13011	12896	12880	12837									2.00734		P	8	0	0	0	0	0
P	9	Sample X369	10642	10496	10582	10471	10470	10415					1	10415	8638		1.09735		P	9	0	1	5830	4751	0		0.0625			6351.33	#DIV/0!
P	10	Sample X370	8638	8585	8721	8668	8655	8638									0.664231		P	10	0	0	0	0	0
P	11	Sample X371	7857	8206	8293	8306	8287	8240					0.5	8240	7268		0.584308		P	11	0	0.5	3655	3381	0		0.03125			5169.5	#DIV/0!
P	12	Sample X372	7111	7179	7253	7265	7271	7268									0.40919		P	12	0	0	0	0	0
P	13	Sample X373	5800	6133	6093	6412	6193	6162					0.25	6162	5426		0.238626		P	13	0	0.25	1577	1539	0		0.015625			3862.75	#DIV/0!
P	14	Sample X374	5368	5617	5428	5465	5731	5426									0.138909		P	14	0	0	0	0	0
P	15	Sample X375	6104	6077	6090	6119	6108	6108					0.125	6108	5066		0.230965		P	15	0	0.125	1523	1179	0		0			3724.71	#DIV/0!
P	16	Sample X376	5088	5106	5090	5113	5107	5066									0.0935781		P	16	0	0	0	0	0
P	17	Sample X377	4991	5156	5243	5255	5282	5253					0.0625	5253	5284		0.11686		P	17	0	0.0625	668	1397	0
P	18	Sample X378	5122	5279	5249	5247	5306	5284									0.120774		P	18	0	0	0	0	0
P	19	Sample X379	4868	5099	5221	5316	5173	5261					0.03125	5261	4278		0.117868		P	19	0	0.03125	676	391	0
P	20	Sample X380	4117	4180	4242	4337	4276	4278									0.00133587		P	20	0	0	0	0	0
P	21	Sample X381	4914	5778	5078	5195	6115	5736					0.015625	5736	4277		0.179705		P	21	0	0.015625	1151	390	0
P	22	Sample X382	4076	4101	4181	4444	4349	4277									0.00122447		P	22	0	0	0	0	0
P	23	Sample X383	4044	4439	5192	4626	4836	4585					0	4585	3887		0.0361929		P	23	0	0	0	0	0
P	24	Sample X384	3846	3787	4032	3842	3934	3887									-0.0412035		P	24	0	0	0	0	0
[truncated: 12 more columns]
