# Supplementary material for: PDZ-directed substrate recruitment is the primary determinant of specific 4E-BP1 dephosphorylation by PP1-Neurabin
Source: eLife journal article supplement (doi:10.7554/elife.103403), 2024-11-20
Supplement: fig5-data1 [file Assay rep3.xlsx]

## Sheet: All Cycles
Well Row	Well Col	Content	Raw Data (425-10/460-20)	Raw Data (425-10/460-20)	Raw Data (425-10/460-20)	Raw Data (425-10/460-20)	Raw Data (425-10/460-20)	Raw Data (425-10/460-20)			Content	Raw Data (425-10/460-20)	Raw Data (425-10/460-20)	Raw Data (425-10/460-20)	Raw Data (425-10/460-20)	Raw Data (425-10/460-20)	Raw Data (425-10/460-20)	Content	Well Row	Well Col	Raw Data (425-10/460-20)	Raw Data (425-10/460-20)	Raw Data (425-10/460-20)	Raw Data (425-10/460-20)	Raw Data (425-10/460-20)						PP1-Neb 0.25nM																PP1-Ph1 1.25 nM
		Time [s]	0	180	360	540	720	900			Time [s]	0	180	360	540	720	900	Time [s]			0	4	8	12	16						4EBP-70-PDZ	4EBP-70-SGS	IRSp53-PDZ	IRSp53-SGS	4EBP-101-PDZ	4EBP-101-SGS	L5A-PDZ	L5A-SGS	V1	V2	V3	V5	V6	V7	V8		4EBP-70-PDZ	4EBP-70-SGS	IRSp53-PDZ
A	1	Sample X1	3968	4229	4478	4763	5103	5380				-0.0434678	-0.0164472	0.0101243	0.0415346	0.080475	0.113449		A	1	0.0794878	0.1116	0.141395	0.174183	0.212572	0.0088723	0			400	0.0088723	0.00332366	0.0267646	0.000165177	0.000382336	0.000134678	0.0211488	0.00200058	0.0629893	0.00334293	0.0107424	0.0213006	0.0964302	0.0251608	0.118229		0.0143923	0.0049498	0.0508331
A	2	Sample X2	4250	4829	5216	5523	5954	6493				-0.0142367	0.0489659	0.0937872	0.130932	0.18563	0.258591		A	2	0.088418	0.157687	0.213673	0.248859	0.304303	0.0143923	0			200	0.00958186	0.000829354	0.0278253	0.00138051	-0.00111169	-0.00119604	0.0166041	-0.00327133	0.0365138	0.00311258	0.00819488	0.0147357	0.0513601	0.0366365	0.0984383		0.00792469	0.0006432	0.030307
A	3	Sample X3	5189	5645	5816	5930	6251	6468				0.0905891	0.146104	0.167779	0.182502	0.225175	0.255087		A	3	0.213545	0.274151	0.29905	0.31515	0.357273	0.00958186	0			100	0.00764956	0.00227272	0.0186826	0.00103086	-0.0014539	-0.00312322	0.0133682	0.000982451	0.0317639	0.00392698	0.00851226	0.0155056	0.0481567	0.0214842	0.0617376		0.00272723	-2.97544e-05	0.0278903
A	4	Sample X4	4660	4840	5105	5326	5539	5731				0.0300567	0.0502104	0.080709	0.10693	0.132908	0.156945		A	4	0.132711	0.158932	0.200595	0.224856	0.251582	0.00792469	0			50	0.00525155	0.00217858	0.0114471	-0.00047254	5.41168e-06	-0.0034856	0.0137289	0.000223643	0.0341616	-9.36416e-05	0.00123217	0.0160689	0.0424223	0.0308394	0.0565342		0.00125456	9.15939e-05	0.0281756
A	5	Sample X5	3875	4226	4356	4575	4862	5129				-0.0528974	-0.0167626	-0.00299371	0.0206928	0.0527043	0.0835212		A	5	0.0700582	0.111284	0.128277	0.153341	0.184802	0.00764956	0			25	0.00417015	0.00197386	0.0151477	0.000605612	-0.000696867	-0.0024758	0.0127287	-0.000599907	0.0249574	0.00413321	0.00704242	0.0105744	0.0244369	0.0270573	0.0436563		-0.000194295	-0.0017672	0.0236638
A	6	Sample X6	4065	3999	4119	4243	4303	4377				-0.0335226	-0.0403017	-0.0279367	-0.0149741	-0.00863297	-0.00074937		A	6	0.0691321	0.0684195	0.0919491	0.102952	0.11004	0.00272723	0			12.5	0.0034532	0.00285342	0.00970571	-0.00048617	-0.000521716	-0.00304504	0.00931928	-6.5799e-05	0.0182724	0.000704675	0.00478153	0.00816313	0.0194473	0.0163987	0.0301642		0.000500346	-0.00082232	0.0180343
A	7	Sample X7	3846	4202	4337	4392	4512	4784				-0.0558169	-0.0192813	-0.00501944	0.000857194	0.0138146	0.0438925		A	7	0.0671387	0.108766	0.126251	0.133505	0.145912	0.00525155	0			6.25	0.00265522	0.00249914	0.00637151	-0.000638329	-0.000164357	-0.00281577	0.00492851	-2.88227e-05	0.00797098	-0.00100525	0.0035002	0.00539927	0.00690149	0.0132711	0.0178521		0.000478491	0.00136392	0.0127359
A	8	Sample X8	4416	4674	4440	4438	4442	4463				0.00343372	0.0316084	0.0060177	0.00580208	0.00623337	0.00850102		A	8	0.106088	0.14033	0.125904	0.123729	0.124907	0.00125456	0			3.125	0.00106864	0.00185496	0.00420166	-0.00096598	-0.000196238	-0.00219629	0.00207677	-0.000548608	0.00296575	-0.00201232	0.00301481	0.00347168	0.00196959	0.00561177	0.0104395		-0.000434675	-0.000481578	0.00935849
A	9	Sample X9	3669	3858	3862	4049	4195	4464				-0.0734251	-0.05461	-0.0542073	-0.0351709	-0.0200145	0.00860915		A	9	0.0495305	0.0734368	0.0770631	0.0974773	0.112083	0.00417015	0			1.5625	-0.000345175	0.00207464	0.000676983	-0.000976433	-0.000983264	-0.00266951	0.0011787	-0.00172569	0.000269435	-0.00385493	0.00286274	0.000898355	-0.00103819	0.00522301	0.00568899		9.75986e-05	-0.000151596	0.00459566
A	10	Sample X10	3912	4062	3725	4146	3723	3796				-0.0491581	-0.0338319	-0.0678931	-0.0251304	-0.0680912	-0.0608276		A	10	0.0534966	0.0748894	0.0519928	0.092796	0.0505822	-0.000194295	0			0.78125	-0.00124141	0.00354774	-0.000522366	-0.00286343	-0.0006084	-0.00212974	0.00115607	7.13028e-05	0.00293789	-0.00205075	5.69822e-05	-0.00167455	-0.00243642	0.00249018	0.0029519		0.000953713	-1.0627e-05	0.00349393
A	11	Sample X11	3662	3741	3775	3927	4085	4162				-0.0741141	-0.0663059	-0.0629234	-0.0476375	-0.0314579	-0.0234632		A	11	0.0488415	0.0617409	0.068347	0.0850106	0.100639	0.0034532	0			0.390625	-0.000711514	-0.00098639	0.000339987	0.00330005	-0.000206603	-0.00186496	4.11048e-05	0.000416148	0.00153579	-0.00401937	0.00451372	-0.00474231	-0.00326375	-0.000788376	0.000676247		0.000612349	-0.000345134	0.000721598
A	12	Sample X12	3960	3942	3973	3906	3876	3860				-0.044283	-0.0461143	-0.0429579	-0.0497655	-0.0527965	-0.0544087		A	12	0.0583717	0.0626069	0.0769279	0.0681609	0.0658769	0.000500346	0			0	0	0	0	0	0	0	0	0	0	0	0	0	0	0	0		0	0	0
A	13	Sample X13	3846	3780	3841	3932	4146	4106				-0.0558169	-0.0624249	-0.0563193	-0.0471301	-0.0251304	-0.0292847		A	13	0.0671387	0.0656219	0.0749511	0.0855181	0.106967	0.00265522	0
A	14	Sample X14	3790	3863	3670	3684	3701	3675				-0.0614269	-0.0541066	-0.0733266	-0.0719468	-0.0702683	-0.0728341		A	14	0.0412277	0.0546146	0.0465592	0.0459796	0.0484051	0.000478491	0				3	27	51	75	99	123	147	171	195	219	243	267	291	315	339		3	27	51
A	15	Sample X15	3879	3871	3800	3900	3947	3970				-0.0524939	-0.0533006	-0.0604278	-0.0503726	-0.045606	-0.0432639		A	15	0.0704617	0.0747461	0.0708426	0.0822756	0.0864913	0.00106864	0				PP1-Neb 0.25nM																PP1-Ph1 1.25 nM
A	16	Sample X16	4158	3957	4165	3940	3939	3979				-0.0238803	-0.0445885	-0.0231502	-0.0463176	-0.0464192	-0.0423457		A	16	0.0787744	0.0641328	0.0967356	0.0716089	0.0722542	-0.000434675	0				4EBP-70-PDZ	4EBP-70-SGS	IRSp53-PDZ	IRSp53-SGS	4EBP-101-PDZ	4EBP-101-SGS	L5A-PDZ	L5A-SGS	V1	V2	V3	V5	V6	V7	V8		4EBP-70-PDZ	4EBP-70-SGS	IRSp53-PDZ
A	17	Sample X17	3826	3948	3624	3910	3682	3745				-0.0578247	-0.0455043	-0.0778447	-0.0493606	-0.072144	-0.0659086		A	17	0.0651309	0.0825425	0.0534257	0.0832876	0.0599533	-0.000345175	0		0	400	0.0088723	0.00332366	0.0267646	0.000165177	0.000382336	0.000134678	0.0211488	0.00200058	0.0629893	0.00334293	0.0107424	0.0213006	0.0964302	0.0251608	0.118229		0.0143923	0.0049498	0.0508331
A	18	Sample X18	4085	4053	3947	3938	3943	3964				-0.0314579	-0.0347591	-0.045606	-0.0465208	-0.0460127	-0.0438755		A	18	0.0711967	0.0739622	0.0742798	0.0714057	0.0726607	9.75986e-05	0		2	200	0.00958186	0.000829354	0.0278253	0.00138051	-0.00111169	-0.00119604	0.0166041	-0.00327133	0.0365138	0.00311258	0.00819488	0.0147357	0.0513601	0.0366365	0.0984383		0.00792469	0.0006432	0.030307
A	19	Sample X19	4083	3805	3783	3785	3810	3813				-0.0316646	-0.0599278	-0.0621256	-0.061926	-0.0594275	-0.0591272		A	19	0.091291	0.068119	0.0691448	0.0707221	0.0726698	-0.00124141	0		4	100	0.00764956	0.00227272	0.0186826	0.00103086	-0.0014539	-0.00312322	0.0133682	0.000982451	0.0317639	0.00392698	0.00851226	0.0155056	0.0481567	0.0214842	0.0617376		0.00272723	-2.97544e-05	0.0278903
A	20	Sample X20	3877	3868	3869	3860	3860	3879				-0.0526956	-0.053603	-0.0535022	-0.0544087	-0.0544087	-0.0524939		A	20	0.049959	0.0551183	0.0663836	0.0635177	0.0642647	0.000953713	0		6	50	0.00525155	0.00217858	0.0114471	-0.00047254	5.41168e-06	-0.0034856	0.0137289	0.000223643	0.0341616	-9.36416e-05	0.00123217	0.0160689	0.0424223	0.0308394	0.0565342		0.00125456	9.15939e-05	0.0281756
A	21	Sample X21	3609	3518	3437	3439	3404	3409				-0.0793129	-0.0881657	-0.0959688	-0.095777	-0.0991273	-0.0986495		A	21	0.0436427	0.039881	0.0353016	0.0368711	0.03297	-0.000711514	0		8	25	0.00417015	0.00197386	0.0151477	0.000605612	-0.000696867	-0.0024758	0.0127287	-0.000599907	0.0249574	0.00413321	0.00704242	0.0105744	0.0244369	0.0270573	0.0436563		-0.000194295	-0.0017672	0.0236638
A	22	Sample X22	3505	3507	3457	3429	3434	3447				-0.0894229	-0.0892297	-0.0940488	-0.0967356	-0.0962565	-0.0950094		A	22	0.0132317	0.0194916	0.025837	0.0211908	0.0224169	0.000612349	0		10	12.5	0.0034532	0.00285342	0.00970571	-0.00048617	-0.000521716	-0.00304504	0.00931928	-6.5799e-05	0.0182724	0.000704675	0.00478153	0.00816313	0.0194473	0.0163987	0.0301642		0.000500346	-0.00082232	0.0180343
A	23	Sample X23	3151	3096	3061	3046	3052	3048				-0.122956	-0.128047	-0.13127	-0.132648	-0.132097	-0.132465		A	23	0	0	0	0	0	0	0		12	6.25	0.00265522	0.00249914	0.00637151	-0.000638329	-0.000164357	-0.00281577	0.00492851	-2.88227e-05	0.00797098	-0.00100525	0.0035002	0.00539927	0.00690149	0.0132711	0.0178521		0.000478491	0.00136392	0.0127359
A	24	Sample X24	3367	3303	3184	3205	3197	3157				-0.102655	-0.108721	-0.119886	-0.117926	-0.118673	-0.122398		A	24	0	0	0	0	0	0	0		14	3.125	0.00106864	0.00185496	0.00420166	-0.00096598	-0.000196238	-0.00219629	0.00207677	-0.000548608	0.00296575	-0.00201232	0.00301481	0.00347168	0.00196959	0.00561177	0.0104395		-0.000434675	-0.000481578	0.00935849
B	1	Sample X25	3927	3950	3964	3986	4008	4041				-0.0476375	-0.0453009	-0.0438755	-0.0416308	-0.0393804	-0.0359938		B	1	0.0199582	0.0621917	0.0638062	0.0657671	0.069813	0.00332366	0		16	1.5625	-0.000345175	0.00207464	0.000676983	-0.000976433	-0.000983264	-0.00266951	0.0011787	-0.00172569	0.000269435	-0.00385493	0.00286274	0.000898355	-0.00103819	0.00522301	0.00568899		9.75986e-05	-0.000151596	0.00459566
B	2	Sample X26	3974	4354	4287	4423	4555	4666				-0.0428559	-0.00320716	-0.0103284	0.00418661	0.0185036	0.0307214		B	2	-0.00183824	0.0384237	0.0373091	0.0595009	0.0724088	0.0049498	0		18	0.78125	-0.00124141	0.00354774	-0.000522366	-0.00286343	-0.0006084	-0.00212974	0.00115607	7.13028e-05	0.00293789	-0.00205075	5.69822e-05	-0.00167455	-0.00243642	0.00249018	0.0029519		0.000953713	-1.0627e-05	0.00349393
B	3	Sample X27	4497	4465	4897	4790	4224	4170				0.0121847	0.00871729	0.056686	0.0445674	-0.0169727	-0.0226284		B	3	0.0797804	0.11621	0.164368	0.151965	0.0922207	0.000829354	0		20	0.390625	-0.000711514	-0.00098639	0.000339987	0.00330005	-0.000206603	-0.00186496	4.11048e-05	0.000416148	0.00153579	-0.00401937	0.00451372	-0.00474231	-0.00326375	-0.000788376	0.000676247		0.000612349	-0.000345134	0.000721598
B	4	Sample X28	3659	3552	3532	3574	3626	3634				-0.0744092	-0.0848688	-0.0868097	-0.0827287	-0.0776488	-0.0768646		B	4	-0.0333916	-0.043238	-0.0391722	-0.0274145	-0.0237436	0.0006432	0		22	0	0	0	0	0	0	0	0	0	0	0	0	0	0	0	0		0	0	0
B	5	Sample X29	3734	3699	3660	3602	3658	3690				-0.0670006	-0.0704659	-0.0743109	-0.0799971	-0.0745076	-0.0713548		B	5	0.000595047	0.0370266	0.0333708	0.0274008	0.0346858	0.00227272	0
B	6	Sample X30	4281	4158	4147	4170	4154	4188				-0.0109633	-0.0238803	-0.0250263	-0.0226284	-0.0242972	-0.0207472		B	6	0.0300543	0.0177505	0.0226112	0.0326858	0.029608	-2.97544e-05	0
B	7	Sample X31	3962	3855	3834	3851	3874	3877				-0.0440792	-0.0549119	-0.0570221	-0.0553142	-0.0529982	-0.0526956		B	7	0.0235164	0.0525806	0.0506596	0.0520837	0.0561952	0.00217858	0
B	8	Sample X32	4323	4271	4232	4190	4214	4225				-0.00650915	-0.0120206	-0.0161318	-0.0205379	-0.0180228	-0.0168676		B	8	0.0345085	0.0296103	0.0315058	0.0347763	0.0358824	9.15939e-05	0
B	9	Sample X33	3713	3652	3643	3668	3591	3617				-0.0690815	-0.0750974	-0.0759814	-0.0735236	-0.0810713	-0.0785302		B	9	-0.00148582	0.0323951	0.0317002	0.0338744	0.0281221	0.00197386	0
B	10	Sample X34	4148	3991	3951	3776	3761	3754				-0.0249222	-0.0411199	-0.0451991	-0.0628237	-0.0643178	-0.0650142		B	10	0.0160954	0.000510952	0.0024384	-0.00750949	-0.0104126	-0.0017672	0
B	11	Sample X35	3822	3805	3786	3841	3834	3821				-0.0582257	-0.0599278	-0.0618262	-0.0563193	-0.0570221	-0.0583259		B	11	0.00937002	0.0475647	0.0458554	0.0510786	0.0521712	0.00285342	0
B	12	Sample X36	3835	3667	3720	3622	3580	3571				-0.0569218	-0.073622	-0.0683884	-0.0780406	-0.0821441	-0.0830209		B	12	-0.0159041	-0.0319912	-0.0207509	-0.0227264	-0.0282389	-0.00082232	0
B	13	Sample X37	3637	3556	3589	3550	3595	3579				-0.0765703	-0.0844801	-0.0812665	-0.0850631	-0.0806809	-0.0822416		B	13	-0.00897461	0.0230124	0.0264152	0.0223348	0.0285125	0.00249914	0
B	14	Sample X38	3505	3556	3516	3614	3583	3606				-0.0894229	-0.0844801	-0.0883593	-0.0788238	-0.0818517	-0.0796062		B	14	-0.0484053	-0.0428493	-0.0407218	-0.0235095	-0.0279465	0.00136392	0
B	15	Sample X39	3917	3845	3772	3774	3780	3797				-0.0486515	-0.0559174	-0.0632224	-0.0630231	-0.0624249	-0.0607277		B	15	0.0189442	0.0515751	0.0444593	0.0443748	0.0467685	0.00185496	0
B	16	Sample X40	4121	4069	4009	3928	3925	3881				-0.0277292	-0.0331101	-0.039278	-0.0475361	-0.0478404	-0.0522921		B	16	0.0132885	0.00852077	0.00835957	0.00777818	0.0060648	-0.000481578	0
B	17	Sample X41	4084	4029	4003	3966	3982	3973				-0.0315613	-0.0372268	-0.0398924	-0.0436716	-0.0420394	-0.0429579		B	17	0.0360344	0.0702657	0.0677893	0.0637263	0.067154	0.00207464	0
B	18	Sample X42	3913	3793	3803	3826	3762	3787				-0.0490568	-0.0611273	-0.0601278	-0.0578247	-0.0642183	-0.0617264		B	18	-0.00803913	-0.0194965	-0.0124903	-0.00251043	-0.0103131	-0.000151596	0
B	19	Sample X43	4060	3841	3895	4211	4172	3928				-0.034038	-0.0563193	-0.0508781	-0.0183376	-0.0224196	-0.0475361		B	19	0.0335577	0.0511732	0.0568036	0.0890603	0.0867738	0.00354774	0
B	20	Sample X44	3833	3801	3774	3699	3702	3669				-0.0571225	-0.0603278	-0.0630231	-0.0704659	-0.0701695	-0.0734251		B	20	-0.0161048	-0.018697	-0.0153856	-0.0151517	-0.0162642	-1.0627e-05	0
B	21	Sample X45	4365	3612	4076	3505	3820	3504				-0.00203254	-0.0790194	-0.0323876	-0.0894229	-0.0584261	-0.0895196		B	21	0.0655631	0.0284731	0.0752941	0.017975	0.0507673	-0.00098639	0
B	22	Sample X46	3876	3620	3721	3648	3695	3649				-0.0527965	-0.0782365	-0.0682894	-0.0754904	-0.0708611	-0.0753922		B	22	-0.0117789	-0.0366057	-0.0206519	-0.0201762	-0.0169559	-0.000345134	0
B	23	Sample X47	3728	3316	3314	3317	3298	3280				-0.0675957	-0.107493	-0.107682	-0.107398	-0.109193	-0.110891		B	23	0	0	0	0	0	0	0
B	24	Sample X48	3992	3986	3927	3851	3865	3866				-0.0410176	-0.0416308	-0.0476375	-0.0553142	-0.0539052	-0.0538045		B	24	0	0	0	0	0	0	0
C	1	Sample X49	8635	9693	9658	10193	10416	10929				0.61115	0.834352	0.826305	0.95497	1.01242	1.1542		C	1	0.690365	0.91922	0.907864	1.03242	1.09183	0.0267646	0
C	2	Sample X50	8933	10007	10577	11220	11784	12357				0.670075	0.908824	1.05542	1.2412	1.42538	1.63697		C	2	0.677753	0.918305	1.07481	1.25775	1.44025	0.0508331	0
C	3	Sample X51	6490	7078	7794	8223	8959	9402				0.25817	0.344149	0.459142	0.534192	0.675354	0.768918		C	3	0.337385	0.429018	0.540701	0.611645	0.754764	0.0278253	0
C	4	Sample X52	7362	7936	8517	9107	9699	10211				0.388321	0.48344	0.588591	0.70584	0.835736	0.95952		C	4	0.395999	0.492921	0.607977	0.722393	0.850605	0.030307	0
C	5	Sample X53	5503	6009	6594	6955	7488	7939				0.128468	0.192835	0.272868	0.32557	0.408511	0.483959		C	5	0.207683	0.277704	0.354427	0.403023	0.487922	0.0186826	0
C	6	Sample X54	6681	7255	7874	8488	9062	9649				0.285327	0.371465	0.472767	0.583112	0.696491	0.824244		C	6	0.293005	0.380946	0.492153	0.599665	0.71136	0.0278903	0
C	7	Sample X55	4516	4882	5075	5563	5955	6376				0.0142498	0.0549774	0.0772055	0.13588	0.18576	0.242298		C	7	0.0934648	0.139846	0.158765	0.213333	0.265171	0.0114471	0
C	8	Sample X56	5771	6558	7270	7880	8458	8972				0.162028	0.267756	0.373812	0.473795	0.577471	0.678001		C	8	0.169706	0.277237	0.393199	0.490348	0.59234	0.0281756	0
C	9	Sample X57	4723	5041	5721	6064	6532	6938				0.03706	0.0732508	0.155678	0.200093	0.26408	0.323028		C	9	0.116275	0.15812	0.237237	0.277546	0.343491	0.0151477	0
C	10	Sample X58	5465	5922	6589	7248	7867	8384				0.123802	0.181461	0.272156	0.370372	0.471568	0.563669		C	10	0.13148	0.190943	0.291542	0.386924	0.486437	0.0236638	0
C	11	Sample X59	4276	4542	5088	5916	5547	5922				-0.0114921	0.0170834	0.078722	0.180682	0.133898	0.181461		C	11	0.067723	0.101952	0.160281	0.258135	0.213309	0.00970571	0
C	12	Sample X60	5719	6102	6688	7211	7551	7976				0.155425	0.205139	0.286336	0.364609	0.418748	0.49038		C	12	0.163103	0.214621	0.305722	0.381162	0.433617	0.0180343	0
C	13	Sample X61	4077	4263	4634	4726	4953	5160				-0.0322844	-0.0128654	0.0271822	0.0373948	0.0630926	0.0871663		C	13	0.0469307	0.0720034	0.108741	0.114848	0.142503	0.00637151	0
C	14	Sample X62	4904	5264	5556	6002	6369	6779				0.0574844	0.0994996	0.135013	0.191915	0.241331	0.299543		C	14	0.0651622	0.108981	0.154399	0.208467	0.2562	0.0127359	0
C	15	Sample X63	3719	3878	4140	4217	4331	4460				-0.0684875	-0.0525948	-0.0257548	-0.0177079	-0.00565819	0.00817672		C	15	0.0107276	0.0322741	0.0558043	0.0597449	0.0737525	0.00420166	0
C	16	Sample X64	5039	5301	5583	5885	6110	6304				0.0730187	0.103927	0.138364	0.176664	0.206205	0.2324		C	16	0.0806966	0.113408	0.15775	0.193216	0.221074	0.00935849	0
C	17	Sample X65	4427	4402	4419	4458	4519	4580				0.00461712	0.00192985	0.00375631	0.00796059	0.0145763	0.021241		C	17	0.0838322	0.0867987	0.0853154	0.0854134	0.0939869	0.000676983	0
C	18	Sample X66	4116	4200	4413	4567	4691	4837				-0.028248	-0.0194908	0.00311125	0.0198165	0.033496	0.0498708		C	18	-0.0205701	-0.0100098	0.0224973	0.0363688	0.0483648	0.00459566	0
C	19	Sample X67	3876	3774	3716	3736	3796	4011				-0.0527965	-0.0630231	-0.0687845	-0.0668022	-0.0608276	-0.0390731		C	19	0.0264186	0.0218458	0.0127746	0.0106506	0.0185831	-0.000522366	0
C	20	Sample X68	4400	4501	4587	4652	4811	4883				0.00171521	0.012619	0.0220089	0.0291713	0.0469332	0.0550912		C	20	0.00939309	0.0221001	0.041395	0.0457236	0.061802	0.00349393	0
C	21	Sample X69	3610	3673	3698	3719	3660	3670				-0.0792151	-0.0730311	-0.0705647	-0.0684875	-0.0743109	-0.0733266		C	21	0	0.0118377	0.0109944	0.00896531	0.0050998	0.000339987	0
C	22	Sample X70	4348	4356	4351	4313	4382	4440				-0.00384721	-0.00299371	-0.00352725	-0.00757169	-0.00021417	0.0060177		C	22	0.00383066	0.00648737	0.0158588	0.00898065	0.0146546	0.000721598	0
C	23	Sample X71	3610	3552	3586	3628	3608	3568				-0.0792151	-0.0848688	-0.0815591	-0.0774528	-0.0794107	-0.0833129		C	23	0	0	0	0	0	0	0
C	24	Sample X72	4312	4295	4201	4228	4244	4228				-0.00767788	-0.00948108	-0.0193861	-0.0165523	-0.0148688	-0.0165523		C	24	0	0	0	0	0	0	0
D	1	Sample X73	6355	6260	6163	6292	6388	6528				0.239401	0.226398	0.213294	0.23076	0.243957	0.263516		D	1	0.26713	0.25827	0.240192	0.247102	0.269608	0.000165177	0
D	2	Sample X74	5057	5668	6159	6668	7180	7622				0.0751097	0.148992	0.212757	0.283455	0.359805	0.430399		D	2	0.13893	0.217974	0.286477	0.357865	0.436081	0.0198101	0
D	3	Sample X75	3683	3742	3809	3822	3911	3940				-0.0720454	-0.0662066	-0.0595276	-0.0582257	-0.0492593	-0.0463176		D	3	-0.0443162	-0.0343354	-0.0326292	-0.0418836	-0.0236085	0.00138051	0
D	4	Sample X76	5133	5749	6397	7045	7565	8017				0.0839908	0.159229	0.245203	0.339132	0.421036	0.497538		D	4	0.147811	0.228212	0.318923	0.413541	0.497311	0.0233	0
D	5	Sample X77	4394	4483	4562	4548	4556	4601				0.00107162	0.010666	0.0192692	0.0177386	0.0186129	0.0235468		D	5	0.0288008	0.0425373	0.0461676	0.0340807	0.0442637	0.00103086	0
D	6	Sample X78	4621	5127	5649	6123	6674	7100				0.0257483	0.0832865	0.146606	0.207939	0.284319	0.347506		D	6	0.0895684	0.152269	0.220326	0.282348	0.360595	0.0180684	0
D	7	Sample X79	4546	4402	4433	4504	4500	4505				0.0175201	0.00192985	0.00526327	0.0129449	0.0125104	0.0130536		D	7	0.0452493	0.0338011	0.0321617	0.029287	0.0381612	-0.00047254	0
D	8	Sample X80	4428	4989	5558	6091	6591	7029				0.00472478	0.0672348	0.13526	0.203676	0.272441	0.336708		D	8	0.0685449	0.136217	0.208981	0.278085	0.348717	0.0186781	0
D	9	Sample X81	4512	4450	4545	4543	4614	4520				0.0138146	0.00709656	0.0174109	0.0171926	0.0249772	0.0146851		D	9	0.0415438	0.0389678	0.0443094	0.0335346	0.050628	0.000605612	0
D	10	Sample X82	3877	4393	4858	5278	5698	6046				-0.0526956	0.000964401	0.0522504	0.101172	0.152771	0.197712		D	10	0.0111244	0.0699469	0.125971	0.175581	0.229047	0.0145282	0
D	11	Sample X83	4018	3985	3993	4001	3967	4038				-0.0383555	-0.041733	-0.0409154	-0.0400971	-0.0435697	-0.0363022		D	11	-0.0106264	-0.00986173	-0.014017	-0.023755	-0.0179189	-0.00048617	0
D	12	Sample X84	4043	4344	4781	5040	5364	5729				-0.0357882	-0.00427366	0.0435553	0.0731347	0.111513	0.156691		D	12	0.0280319	0.0647089	0.117276	0.147544	0.187789	0.0106504	0
D	13	Sample X85	3722	3783	3713	3617	3646	3665				-0.0681903	-0.0621256	-0.0690815	-0.0785302	-0.0756869	-0.0738189		D	13	-0.0404611	-0.0302544	-0.0421831	-0.0621881	-0.0500361	-0.000638329	0
D	14	Sample X86	3501	3804	4154	4410	4742	5042				-0.0898094	-0.0600278	-0.0242972	0.00278889	0.0391827	0.0733669		D	14	-0.0259893	0.00895469	0.0494232	0.0771981	0.115459	0.00942986	0
D	15	Sample X87	4011	3980	4008	3958	3889	3832				-0.0390731	-0.0422436	-0.0393804	-0.0444866	-0.0514844	-0.0572228		D	15	-0.0113439	-0.0103723	-0.012482	-0.0281446	-0.0258336	-0.00096598	0
D	16	Sample X88	3474	3612	3772	3976	4173	4370				-0.0924134	-0.0790194	-0.0632224	-0.0426518	-0.0223151	-0.00149811		D	16	-0.0285933	-0.0100369	0.010498	0.0317574	0.0539608	0.00550361	0
D	17	Sample X89	4049	3909	3932	4018	3926	3954				-0.0351709	-0.0494618	-0.0471301	-0.0383555	-0.047739	-0.0448938		D	17	-0.00744168	-0.0175906	-0.0202317	-0.0220135	-0.0220882	-0.000976433	0
D	18	Sample X90	3837	3831	3965	4167	4267	4430				-0.056721	-0.0573232	-0.0437736	-0.0229415	-0.0124431	0.00494014		D	18	0.00709909	0.0116594	0.0299469	0.0514677	0.0638328	0.00378225	0
D	19	Sample X91	4481	4091	4099	4124	4095	4094				0.0104493	-0.0308376	-0.0300097	-0.0274177	-0.0304237	-0.0305272		D	19	0.0381785	0.00103368	-0.00311132	-0.0110757	-0.00477295	-0.00286343	0
D	20	Sample X92	3783	3854	3978	4059	4181	4242				-0.0621256	-0.0550125	-0.0424477	-0.0341411	-0.0214793	-0.0150794		D	20	0.00169447	0.01397	0.0312727	0.0402681	0.0547967	0.00354015	0
D	21	Sample X93	4476	4086	4149	3814	4939	4278				0.00990769	-0.0313546	-0.0248181	-0.0590271	0.0614868	-0.0112806		D	21	0.0376369	0.00051669	0.00208035	-0.042685	0.0871376	0.00330005	0
D	22	Sample X94	3883	3835	3822	3852	3883	3952				-0.0520902	-0.0569218	-0.0582257	-0.0552137	-0.0520902	-0.0450974		D	22	0.0117298	0.0120608	0.0154948	0.0191955	0.0241857	0.000830389	0
D	23	Sample X95	4121	4081	4129	4230	4141	4153				-0.0277292	-0.0318712	-0.0268984	-0.0163421	-0.0256508	-0.0244014		D	23	0	0	0	0	0	0	0
D	24	Sample X96	3766	3714	3666	3659	3640	3630				-0.0638201	-0.0689825	-0.0737204	-0.0744092	-0.0762759	-0.0772568		D	24	0	0	0	0	0	0	0
E	1	Sample X97	4939	4914	4935	4943	4998	5021				0.0614868	0.0586261	0.0610285	0.0619453	0.0682732	0.0709323		E	1	0.16071	0.156606	0.15671	0.161932	0.166445	0.000382336	0
E	2	Sample X98	5906	5865	5789	5759	5756	5743				0.179384	0.17408	0.164325	0.160501	0.160119	0.158467		E	2	0.183658	0.181652	0.173488	0.170935	0.170236	-0.000894799	0
E	3	Sample X99	4507	4463	4442	4400	4362	4333				0.013271	0.00850102	0.00623337	0.00171521	-0.00235305	-0.00544533		E	3	0.112494	0.106481	0.101914	0.101702	0.0958184	-0.00111169	0
E	4	Sample X100	4862	5145	4997	4992	5181	5788				0.0527043	0.0854008	0.0681578	0.0675808	0.0896437	0.164197		E	4	0.056978	0.0929725	0.0773209	0.078015	0.0997603	0.00285216	0
E	5	Sample X101	4388	4282	4293	4152	4192	4202				0.000428494	-0.0108575	-0.00969298	-0.0245056	-0.0203286	-0.0192813		E	5	0.0996514	0.0871226	0.0859881	0.0754811	0.0778428	-0.0014539	0
E	6	Sample X102	5131	5128	5155	5197	5252	5284				0.083756	0.0834039	0.0865774	0.0915356	0.0980682	0.10189		E	6	0.0880296	0.0909756	0.0957406	0.10197	0.108185	0.00134368	0
E	7	Sample X103	4047	4098	4172	4060	4058	4083				-0.0353767	-0.0301133	-0.0224196	-0.034038	-0.0342441	-0.0316646		E	7	0.0638462	0.0678669	0.0732615	0.0659487	0.0639274	5.41168e-06	0
E	8	Sample X104	4973	5455	4802	4742	4731	5049				0.0653915	0.122579	0.0459185	0.0391827	0.0379531	0.0741798		E	8	0.0696652	0.13015	0.0550817	0.0496169	0.0480698	-0.0014397	0
E	9	Sample X105	4127	4102	4049	4001	4036	4039				-0.0271062	-0.0296991	-0.0351709	-0.0400971	-0.0365078	-0.0361994		E	9	0.0721167	0.0682811	0.0605102	0.0598896	0.0616637	-0.000696867	0
E	10	Sample X106	4628	4582	4592	4629	4664	4695				0.0265201	0.0214603	0.0225579	0.0266304	0.0304998	0.0339408		E	10	0.0307938	0.029032	0.031721	0.0370647	0.0406164	0.000654842	0
E	11	Sample X107	4059	4180	4128	4017	3993	4008				-0.0341411	-0.0215838	-0.0270023	-0.0384581	-0.0409154	-0.0393804		E	11	0.0650818	0.0763964	0.0686788	0.0615286	0.0572561	-0.000521716	0
E	12	Sample X108	4919	4812	4816	4751	4746	4772				0.0591976	0.047046	0.0474974	0.0401899	0.0396302	0.0425444		E	12	0.0634712	0.0546177	0.0566605	0.0506241	0.0497468	-0.000914961	0
E	13	Sample X109	3895	3916	3876	3850	3881	3906				-0.0508781	-0.0487528	-0.0527965	-0.0554148	-0.0522921	-0.0497655		E	13	0.0483447	0.0492273	0.0428846	0.0445719	0.0458794	-0.000164357	0
E	14	Sample X110	4585	4355	4915	4529	4434	5008				0.0217894	-0.00310044	0.0587404	0.0156655	0.00537101	0.0694284		E	14	0.0260631	0.00447125	0.0679035	0.0260997	0.0154876	-0.000705031	0
E	15	Sample X111	4237	4308	4334	4228	4219	4213				-0.0156057	-0.00810249	-0.00533888	-0.0165523	-0.0174979	-0.0181277		E	15	0.0836171	0.0898777	0.0903422	0.0834344	0.0806735	-0.000196238	0
E	16	Sample X112	4813	4829	4816	4667	4625	4587				0.0471588	0.0489659	0.0474974	0.0308322	0.0261893	0.0220089		E	16	0.0514325	0.0565376	0.0566605	0.0412665	0.0363059	-0.00100844	0
E	17	Sample X113	3560	3552	3454	3409	3418	3441				-0.0840912	-0.0848688	-0.0943371	-0.0986495	-0.0977888	-0.0955852		E	17	0.0151316	0.0131113	0.00134401	0.00133716	0.000382653	-0.000983264	0
E	18	Sample X114	4270	4233	4185	4158	4170	4169				-0.0121262	-0.0160266	-0.021061	-0.0238803	-0.0226284	-0.0227328		E	18	-0.00785256	-0.00845489	-0.0118979	-0.0134461	-0.0125118	-0.000310614	0
E	19	Sample X115	3605	3574	4001	3512	3522	3486				-0.0797039	-0.0827287	-0.0400971	-0.0887462	-0.0877785	-0.091257		E	19	0.0195189	0.0152514	0.055584	0.0112405	0.0103929	-0.0006084	0
E	20	Sample X116	4234	4224	4237	4226	4286	4265				-0.0159214	-0.0169727	-0.0156057	-0.0167626	-0.0104342	-0.0126543		E	20	-0.0116477	-0.00940103	-0.00644261	-0.00632832	-0.000317605	0.000755342	0
E	21	Sample X117	3594	3559	3583	3578	3573	3555				-0.0807785	-0.0841885	-0.0818517	-0.082339	-0.0828261	-0.0845773		E	21	0.0184444	0.0137917	0.0138294	0.0176477	0.0153453	-0.000206603	0
E	22	Sample X118	4257	4200	4118	4177	4231	4267				-0.0134986	-0.0194908	-0.0280405	-0.0218973	-0.0162369	-0.0124431		E	22	-0.00922491	-0.0119191	-0.0188774	-0.0114631	-0.00612029	0.000206975	0
E	23	Sample X119	3403	3416	3440	3395	3414	3413				-0.0992229	-0.0979802	-0.0956811	-0.0999867	-0.0981715	-0.0982671		E	23	0	0	0	0	0	0	0
E	24	Sample X120	4344	4313	4298	4286	4289	4291				-0.00427366	-0.00757169	-0.00916313	-0.0104342	-0.0101166	-0.00990483		E	24	0	0	0	0	0	0	0
F	1	Sample X121	4896	4945	5002	5106	5170	5082				0.056572	0.0621747	0.0687351	0.080826	0.0883452	0.0780218		F	1	0.0878231	0.0951815	0.101123	0.0959054	0.0898433	0.000134678	0
F	2	Sample X122	5063	5091	5053	5049	5053	5077				0.0758078	0.0790724	0.0746446	0.0741798	0.0746446	0.0774387		F	2	0.178367	0.196532	0.187605	0.19695	0.19964	0.00141821	0
F	3	Sample X123	5211	5557	5581	5353	5310	5443				0.0931941	0.135137	0.138115	0.110184	0.105007	0.121112		F	3	0.124445	0.168143	0.170503	0.125263	0.106505	-0.00119604	0
F	4	Sample X124	4634	4629	4591	4554	4620	4626				0.0271822	0.0266304	0.0224481	0.0183943	0.0256381	0.0262995		F	4	0.129742	0.14409	0.135409	0.141164	0.150634	0.00139282	0
F	5	Sample X125	4757	4657	4589	4595	4603	4637				0.040862	0.0297246	0.0222285	0.0228874	0.0237667	0.0275134		F	5	0.0721132	0.0627315	0.0546161	0.0379668	0.0252648	-0.00312322	0
F	6	Sample X126	4686	4665	4651	4641	4616	4578				0.0329404	0.0306106	0.0290607	0.0279552	0.0251974	0.0210217		F	6	0.1355	0.14807	0.142021	0.150725	0.150193	0.000979555	0
F	7	Sample X127	4780	4641	4573	4554	4577	4565				0.0434429	0.0279552	0.0204737	0.0183943	0.020912	0.0195975		F	7	0.0746941	0.0609621	0.0528613	0.0334737	0.0224102	-0.0034856	0
F	8	Sample X128	4130	4148	4115	4109	4149	4150				-0.0267945	-0.0249222	-0.0283517	-0.0289739	-0.0248181	-0.0247139		F	8	0.075765	0.092537	0.084609	0.093796	0.100178	0.00162752	0
F	9	Sample X129	4292	4247	4234	4205	4222	4227				-0.00979891	-0.0145528	-0.0159214	-0.0189668	-0.0171828	-0.0166575		F	9	0.0214523	0.0184541	0.0164662	-0.0038874	-0.0156847	-0.0024758	0
F	10	Sample X130	4205	4138	4122	4119	4091	4061				-0.0189668	-0.0259629	-0.0276254	-0.0279367	-0.0308376	-0.033935		F	10	0.0835927	0.0914964	0.0853353	0.0948331	0.0941583	0.00070437	0
F	11	Sample X131	4440	4338	4299	4246	4291	4325				0.0060177	-0.00491294	-0.00905713	-0.0146581	-0.00990483	-0.00629648		F	11	0.0372689	0.0280939	0.0233305	0.000421284	-0.00840672	-0.00304504	0
F	12	Sample X132	4052	4025	4009	3958	3929	3921				-0.0348621	-0.0376374	-0.039278	-0.0444866	-0.0474346	-0.0482461		F	12	0.0676975	0.0798218	0.0736828	0.0782832	0.0775612	0.000657584	0
F	13	Sample X133	4270	4307	4131	4168	4151	4186				-0.0121262	-0.00820861	-0.0266906	-0.0228372	-0.0246098	-0.0209564		F	13	0.019125	0.0247983	0.00569703	-0.00775775	-0.0231117	-0.00281577	0
F	14	Sample X134	4038	3981	3867	3860	3858	3860				-0.0363022	-0.0421415	-0.0537037	-0.0544087	-0.05461	-0.0544087		F	14	0.0662573	0.0753177	0.059257	0.0683612	0.0703858	0.000275235	0
F	15	Sample X135	3795	3737	3769	3737	3763	3751				-0.0609275	-0.066703	-0.0635213	-0.066703	-0.0641188	-0.0653124		F	15	-0.0296763	-0.0336961	-0.0311337	-0.0516235	-0.0626206	-0.00219629	0
F	16	Sample X136	4111	4090	4015	4020	4006	3892				-0.0287665	-0.030941	-0.0386631	-0.0381504	-0.0395852	-0.0511813		F	16	0.073793	0.0865182	0.0742976	0.0846194	0.0854106	0.000774507	0
F	17	Sample X137	4097	4106	3995	4014	3997	3996				-0.0302168	-0.0292847	-0.0407109	-0.0387656	-0.0405063	-0.0406086		F	17	0.00103442	0.00372215	-0.00832326	-0.0236862	-0.0390082	-0.00266951	0
F	18	Sample X138	3430	3469	3363	3302	3316	3308				-0.0966398	-0.0928947	-0.103035	-0.108816	-0.107493	-0.108249		F	18	0.00591972	0.0245645	0.00992561	0.0139542	0.0175033	0.000772238	0
F	19	Sample X139	4183	4098	4114	4158	4162	4153				-0.0212702	-0.0301133	-0.0284555	-0.0238803	-0.0234632	-0.0244014		F	19	0.00998102	0.00289364	0.00393218	-0.00880088	-0.0219651	-0.00212974	0
F	20	Sample X140	3416	3489	3324	3508	3336	3307				-0.0979802	-0.0909677	-0.106735	-0.089133	-0.105599	-0.108343		F	20	0.00457937	0.0264915	0.00622523	0.0336369	0.0193972	0.000987854	0
F	21	Sample X141	4180	4323	4182	4156	4197	4168				-0.0215838	-0.00650915	-0.0213747	-0.0240888	-0.0198051	-0.0228372		F	21	0.0096674	0.0264977	0.0110129	-0.00900936	-0.018307	-0.00186496	0
F	22	Sample X142	3793	3632	4474	4508	4482	4357				-0.0611273	-0.0770607	0.00969114	0.0133797	0.0105577	-0.00288697		F	22	0.0414322	0.0403985	0.122652	0.13615	0.135553	0.00627475	0
F	23	Sample X143	4087	4070	4076	4242	4370	4703				-0.0312512	-0.0330069	-0.0323876	-0.0150794	-0.00149811	0.0348309		F	23	0	0	0	0	0	0	0
F	24	Sample X144	3368	3210	3258	3153	3129	3140				-0.10256	-0.117459	-0.112961	-0.12277	-0.124996	-0.123976		F	24	0	0	0	0	0	0	0
G	1	Sample X145	8601	8983	9311	9690	10066	10415				0.604606	0.680247	0.749122	0.83366	0.923293	1.01216		G	1	0.63192	0.61566	0.764307	0.794253	0.949152	0.0211488	0
G	2	Sample X146	10275	11849	12922	14019	14878	15619				0.97582	1.44806	1.87481	2.44574	3.03447	3.69191		G	2	0.957535	1.42495	1.85521	2.42648	2.9908	0.135551	0
G	3	Sample X147	7088	7331	7762	8168	8557	8934				0.345674	0.383411	0.453738	0.524291	0.596191	0.670277		G	3	0.372987	0.318824	0.468923	0.484885	0.622049	0.0166041	0
G	4	Sample X148	7551	8924	10481	10481	11899	11883				0.418748	0.668253	1.02963	1.02963	1.46572	1.46005		G	4	0.400463	0.645146	1.01003	1.01036	1.42205	0.068106	0
G	5	Sample X149	6019	6392	6811	7110	7411	7821				0.194151	0.244511	0.304227	0.349036	0.396129	0.463722		G	5	0.221465	0.179924	0.319412	0.30963	0.421988	0.0133682	0
G	6	Sample X150	6436	7161	8054	8620	9044	9644				0.250621	0.356871	0.504036	0.608258	0.692771	0.8231		G	6	0.232336	0.333764	0.484438	0.588989	0.649103	0.0277845	0
G	7	Sample X151	5754	5972	6466	6828	7228	7648				0.159865	0.187982	0.254808	0.306724	0.367253	0.434697		G	7	0.187179	0.123396	0.269992	0.267318	0.393112	0.0137289	0
G	8	Sample X152	6231	6253	6629	6913	7247	7661				0.222463	0.225447	0.277862	0.3193	0.370216	0.436852		G	8	0.204178	0.20234	0.258264	0.300031	0.326548	0.00815801	0
G	9	Sample X153	5142	5542	5877	6220	6626	7028				0.0850481	0.133279	0.17563	0.220974	0.277433	0.336557		G	9	0.112362	0.0686931	0.190814	0.181567	0.303292	0.0127287	0
G	10	Sample X154	5202	5337	5504	5678	5944	6131				0.0921276	0.108254	0.128591	0.15025	0.184325	0.209008		G	10	0.0738426	0.085147	0.108993	0.130981	0.140657	0.00445432	0
G	11	Sample X155	5151	5266	5680	5995	6267	6541				0.0861066	0.0997384	0.150502	0.190996	0.227351	0.265351		G	11	0.11342	0.0351521	0.165686	0.15159	0.25321	0.00931928	0
G	12	Sample X156	5210	5307	5353	5462	5547	5650				0.0930756	0.104647	0.110184	0.123435	0.133898	0.146731		G	12	0.0747906	0.0815394	0.0905862	0.104166	0.0902303	0.00102931	0
G	13	Sample X157	4822	5025	5114	5255	5463	5644				0.0481749	0.0713955	0.0817626	0.0984259	0.123558	0.145979		G	13	0.0754888	0.00680928	0.0969473	0.0590195	0.149416	0.00492851	0
G	14	Sample X158	4949	4971	4890	4872	4885	4934				0.0626335	0.0651614	0.0558882	0.0538402	0.0553189	0.0609139		G	14	0.0443486	0.0420542	0.0362907	0.034571	0.0116512	-0.00217983	0
G	15	Sample X159	4412	4563	4552	4598	4710	4770				0.00300379	0.0193786	0.0181756	0.023217	0.0356104	0.0423199		G	15	0.0303177	-0.0452076	0.0333604	-0.0161893	0.0614693	0.00207677	0
G	16	Sample X160	4603	4640	4661	4665	4667	4651				0.0237667	0.0278447	0.0301675	0.0306106	0.0308322	0.0290607		G	16	0.00548178	0.00473759	0.0105699	0.0113414	-0.0128355	-0.00122115	0
G	17	Sample X161	4232	4442	4280	4337	4412	4463				-0.0161318	0.00623337	-0.0110691	-0.00501944	0.00300379	0.00850102		G	17	0.0111821	-0.0583529	0.0041156	-0.0444258	0.0288626	0.0011787	0
G	18	Sample X162	4695	4816	4585	4825	4570	4598				0.0339408	0.0474974	0.0217894	0.0485138	0.020145	0.023217		G	18	0.0156558	0.0243902	0.00219191	0.0292446	-0.0235227	-0.0026119	0
G	19	Sample X163	4611	4673	4630	4692	4780	4792				0.0246469	0.0314974	0.0267408	0.0336072	0.0434429	0.0447924		G	19	0.0519608	-0.0330888	0.0419255	-0.0057992	0.0693018	0.00115607	0
G	20	Sample X164	4881	5355	4795	4804	4840	5259				0.0548636	0.110425	0.0451301	0.0461439	0.0502104	0.0989029		G	20	0.0365787	0.0873181	0.0255326	0.0268747	0.00654264	-0.0020024	0
G	21	Sample X165	4523	4442	4603	4549	4542	4574				0.0150118	0.00623337	0.0237667	0.0178478	0.0170834	0.0205832		G	21	0.0423257	-0.0583529	0.0389514	-0.0215586	0.0429423	4.11048e-05	0
G	22	Sample X166	4761	4840	4644	4700	4707	4712				0.0413103	0.0502104	0.0282867	0.034497	0.0352762	0.0358333		G	22	0.0230254	0.0271032	0.00868917	0.0152278	-0.00839146	-0.00209446	0
G	23	Sample X167	4125	4966	4241	4744	4139	4110				-0.0273139	0.0645863	-0.0151847	0.0394064	-0.0258589	-0.0288702		G	23	0	0	0	0	0	0	0
G	24	Sample X168	4553	4597	4565	4562	4782	4613				0.0182849	0.0231071	0.0195975	0.0192692	0.0436677	0.0248671		G	24	0	0	0	0	0	0	0
H	1	Sample X169	7124	7276	7083	7216	7280	7313				0.351181	0.374753	0.344911	0.365386	0.37538	0.38057		H	1	0.406998	0.430469	0.404338	0.423412	0.437007	0.00200058	0
H	2	Sample X170	10015	12253	13739	14911	15826	16558				0.910777	1.59652	2.28374	3.06037	3.90889	4.83654		H	2	0.987053	1.67485	2.36637	3.14184	3.99075	0.200246	0
H	3	Sample X171	6542	6034	5955	5994	6143	6140				0.265492	0.196128	0.18576	0.190865	0.210613	0.210211		H	3	0.321309	0.251844	0.245188	0.24889	0.272239	-0.00327133	0
H	4	Sample X172	7478	8984	10238	11286	12159	12987				0.406895	0.680451	0.966373	1.26166	1.56077	1.90431		H	4	0.483171	0.758785	1.049	1.34312	1.64262	0.0772968	0
H	5	Sample X173	5310	5328	5296	5352	5384	5406				0.105007	0.10717	0.103327	0.110063	0.113934	0.116604		H	5	0.160824	0.162887	0.162755	0.168088	0.17556	0.000982451	0
H	6	Sample X174	6243	7176	8131	8957	9674	10356				0.224089	0.359187	0.517678	0.674947	0.829977	0.996729		H	6	0.300365	0.437521	0.600309	0.756408	0.911829	0.0407642	0
H	7	Sample X175	5109	5193	5033	5037	5088	5040				0.0811771	0.0910622	0.0723227	0.0727866	0.078722	0.0731347		H	7	0.136994	0.146779	0.13175	0.130812	0.140349	0.000223643	0
H	8	Sample X176	5309	5816	6241	6814	7385	7808				0.104887	0.167779	0.223818	0.304667	0.391979	0.461515		H	8	0.181163	0.246114	0.306449	0.386129	0.473831	0.0195112	0
H	9	Sample X177	4771	4774	4747	4628	4638	4649				0.0424321	0.0427689	0.0397421	0.0265201	0.0276238	0.0288395		H	9	0.098249	0.0984853	0.0991696	0.0845453	0.0892504	-0.000599907	0
H	10	Sample X178	4958	5188	5350	5684	5932	6229				0.0636668	0.0904709	0.109822	0.151005	0.182762	0.222192		H	10	0.139943	0.168805	0.192453	0.232467	0.264614	0.0083114	0
H	11	Sample X179	4741	4805	4675	4693	4680	4704				0.0390708	0.0462566	0.0317193	0.0337184	0.0322741	0.0349422		H	11	0.0948877	0.101973	0.0911468	0.0917436	0.0939007	-6.5799e-05	0
H	12	Sample X180	4894	4938	4894	5181	5249	5386				0.056344	0.0613722	0.056344	0.0896437	0.0977107	0.114176		H	12	0.13262	0.139707	0.138975	0.171105	0.179562	0.0031295	0
H	13	Sample X181	4597	4542	4545	4529	4540	4540				0.0231071	0.0170834	0.0174109	0.0156655	0.0168651	0.0168651		H	13	0.0789241	0.0727998	0.0768385	0.0736907	0.0784917	-2.88227e-05	0
H	14	Sample X182	4876	4890	4655	4660	4736	4790				0.0542949	0.0558882	0.0295032	0.0300567	0.0385118	0.0445674		H	14	0.130571	0.134223	0.112135	0.111518	0.120363	-0.00068049	0
H	15	Sample X183	4329	4256	4249	4205	4196	4262				-0.00587101	-0.013604	-0.014342	-0.0189668	-0.0199098	-0.012971		H	15	0.0499459	0.0421124	0.0450855	0.0390584	0.0417168	-0.000548608	0
H	16	Sample X184	4424	4547	4418	4420	4462	4571				0.00429422	0.0176294	0.00364877	0.00386387	0.00839291	0.0202546		H	16	0.0805701	0.0959637	0.0862801	0.0853254	0.0902446	0.000644963	0
H	17	Sample X185	4310	4091	4046	3990	4006	4016				-0.00789021	-0.0308376	-0.0354796	-0.0412221	-0.0395852	-0.0385606		H	17	0.0479267	0.0248788	0.023948	0.0168031	0.0220414	-0.00172569	0
H	18	Sample X186	4093	4162	4582	4889	4747	4609				-0.0306307	-0.0234632	0.0214603	0.0557743	0.0397421	0.0244268		H	18	0.0456452	0.0548712	0.104092	0.137236	0.121594	0.00506323	0
H	19	Sample X187	4455	4778	4405	4460	4411	4378				0.00763648	0.0432182	0.00225189	0.00817672	0.00289633	-0.000642356		H	19	0.0634534	0.0989346	0.0616794	0.0662019	0.0645229	7.13028e-05	0
H	20	Sample X188	4139	4427	4444	4776	5056	4748				-0.0258589	0.00461712	0.00644909	0.0429935	0.0749934	0.039854		H	20	0.0504171	0.0829515	0.0890804	0.124455	0.156845	0.0070952	0
H	21	Sample X189	4462	4414	4371	4209	4466	4245				0.00839291	0.00321873	-0.00139119	-0.0185474	0.00882544	-0.0147635		H	21	0.0642098	0.0589351	0.0580363	0.0394778	0.070452	0.000416148	0
H	22	Sample X190	4270	4156	3900	3986	3897	3879				-0.0121262	-0.0240888	-0.0503726	-0.0416308	-0.0506759	-0.0524939		H	22	0.0641497	0.0542456	0.0322587	0.0398308	0.0311757	-0.00219826	0
H	23	Sample X191	3846	3847	3810	3824	3788	3804				-0.0558169	-0.0557164	-0.0594275	-0.0580252	-0.0616266	-0.0600278		H	23	0	0	0	0	0	0	0
H	24	Sample X192	3640	3619	3575	3587	3583	3561				-0.0762759	-0.0783344	-0.0826313	-0.0814616	-0.0818517	-0.083994		H	24	0	0	0	0	0	0	0
I	1	Sample X193	6609	8134	9405	10399	11255	12072				0.275005	0.518212	0.769576	1.00796	1.25201	1.52835		I	1	0.349316	0.584618	0.838658	1.05468	1.29416	0.0629893	0
I	2	Sample X194	10279	13394	15514	16972	17997	19204				0.976845	2.10041	3.58805	5.5086	7.95652	14.3225		I	2	0.933852	2.061	3.54562	5.46919	7.91577	0.465461	0
I	3	Sample X195	5418	6603	7598	8412	9069	9581				0.118064	0.27415	0.426447	0.568873	0.697941	0.808775		I	3	0.192375	0.340555	0.495528	0.615596	0.740082	0.0365138	0
I	4	Sample X196	7883	10488	12556	14128	15331	16501				0.47431	1.03149	1.71713	2.51236	3.41615	4.75359		I	4	0.431317	0.992085	1.6747	2.47295	3.3754	0.196272	0
I	5	Sample X197	5278	6377	7168	7928	8628	9376				0.101172	0.242436	0.357951	0.482057	0.6098	0.763231		I	5	0.175483	0.308841	0.427033	0.528781	0.651941	0.0317639	0
I	6	Sample X198	6855	8552	10091	11473	12640	13679				0.310703	0.595238	0.92947	1.32114	1.75211	2.25062		I	6	0.267709	0.555832	0.887038	1.28173	1.71136	0.0962431	0
I	7	Sample X199	5482	6640	7449	8186	8935	9635				0.125887	0.279437	0.402222	0.527522	0.67048	0.821044		I	7	0.200198	0.345842	0.471304	0.574246	0.712621	0.0341616	0
I	8	Sample X200	6397	7492	8567	9247	10095	10914				0.245203	0.409158	0.598098	0.735382	0.930461	1.14985		I	8	0.202209	0.369752	0.555666	0.695976	0.889711	0.0458335	0
I	9	Sample X201	4891	5801	6328	7011	7814	8420				0.0560022	0.165859	0.235688	0.333988	0.462533	0.570363		I	9	0.130313	0.232264	0.30477	0.380712	0.504675	0.0249574	0
I	10	Sample X202	5779	6413	7133	7486	7980	8474				0.163048	0.247422	0.352563	0.408188	0.491076	0.580476		I	10	0.120055	0.208016	0.31013	0.368782	0.450327	0.0220181	0
I	11	Sample X203	4710	5335	5985	6459	7063	7325				0.0356104	0.108013	0.189684	0.253829	0.341866	0.382463		I	11	0.109921	0.174418	0.258766	0.300553	0.384007	0.0182724	0
I	12	Sample X204	5934	6270	6009	6068	6344	6745				0.183022	0.227759	0.192835	0.200623	0.237887	0.294589		I	12	0.140029	0.188353	0.150403	0.161217	0.197137	0.00380719	0
I	13	Sample X205	4086	4396	4680	5137	5437	5762				-0.0313546	0.0012861	0.0322741	0.0844605	0.120379	0.160882		I	13	0.0429563	0.0676913	0.101356	0.131184	0.162521	0.00797098	0
I	14	Sample X206	5277	5408	5468	5606	5736	5994				0.101053	0.116847	0.12417	0.141228	0.157579	0.190865		I	14	0.0580591	0.0774408	0.0817378	0.101822	0.116829	0.00391799	0
I	15	Sample X207	3730	3848	4056	4277	4470	4669				-0.0673974	-0.0556159	-0.0344501	-0.0113864	0.00925819	0.0310539		I	15	0.00691347	0.0107893	0.0346314	0.0353376	0.0513997	0.00296575	0
I	16	Sample X208	4958	4961	5079	5133	5202	5274				0.0636668	0.0640115	0.0776719	0.0839908	0.0921276	0.100694		I	16	0.0206733	0.0246051	0.0352397	0.0445844	0.0513777	0.00204696	0
I	17	Sample X209	3672	3770	4182	3950	4032	4122				-0.0731296	-0.0634217	-0.0213747	-0.0453009	-0.0369187	-0.0276254		I	17	0.00118121	0.0029835	0.0477068	0.00142307	0.00522274	0.000269435	0
I	18	Sample X210	5348	5496	5289	5218	5478	5228				0.10958	0.127607	0.102489	0.0940245	0.125396	0.095212		I	18	0.0665868	0.0882002	0.0600565	0.0546181	0.084646	0.00120394	0
I	19	Sample X211	3925	3797	3872	4022	4645	4243				-0.0478404	-0.0607277	-0.0531998	-0.0379453	0.0283972	-0.0149741		I	19	0.0264704	0.00567752	0.0158817	0.00877866	0.0705387	0.00293789	0
I	20	Sample X212	5855	5262	5468	5819	5571	5560				0.172791	0.0992609	0.12417	0.168164	0.136873	0.135508		I	20	0.129798	0.0598545	0.0817378	0.128758	0.0961231	-0.00224497	0
I	21	Sample X213	3461	3466	3431	3613	4017	4356				-0.0936643	-0.0931834	-0.096544	-0.0789216	-0.0384581	-0.00299371		I	21	-0.0193534	-0.0267782	-0.0274625	-0.0321977	0.00368339	0.00153579	0
I	22	Sample X214	5345	5361	5573	5638	5334	5398				0.109218	0.11115	0.137121	0.145227	0.107893	0.115632		I	22	0.0662249	0.0717437	0.0946893	0.105821	0.0671428	6.11934e-05	0
I	23	Sample X215	3660	3740	3713	3936	3981	3680				-0.0743109	-0.0664052	-0.0690815	-0.0467239	-0.0421415	-0.0723413		I	23	0	0	0	0	0	0	0
I	24	Sample X216	4776	4744	4771	4744	4756	4770				0.0429935	0.0394064	0.0424321	0.0394064	0.0407499	0.0423199		I	24	0	0	0	0	0	0	0
J	1	Sample X217	4222	4469	4793	4966	5209	5583				-0.0171828	0.00914998	0.044905	0.0645863	0.092957	0.138364		J	1	0.0855669	0.0623498	0.0953787	0.100066	0.135711	0.00334293	0
J	2	Sample X218	5105	5440	5828	6155	6368	6645				0.080709	0.120746	0.169319	0.21222	0.241193	0.280153		J	2	0.100409	0.155299	0.200673	0.187573	0.274613	0.0116136	0
J	3	Sample X219	4329	4628	4956	5152	5275	5629				-0.00587101	0.0265201	0.0634371	0.0862243	0.100814	0.144101		J	3	0.0968788	0.07972	0.113911	0.121704	0.143567	0.00311258	0
J	4	Sample X220	4762	4907	5109	5178	5272	5521				0.0414224	0.0578267	0.0811771	0.0892894	0.100455	0.130685		J	4	0.0611228	0.0923799	0.112532	0.0646425	0.133875	0.00485012	0
J	5	Sample X221	4574	4434	4972	5121	5592	5710				0.0205832	0.00537101	0.0652764	0.0825829	0.139484	0.154287		J	5	0.123333	0.0585708	0.11575	0.118062	0.182238	0.00392698	0
J	6	Sample X222	4713	4809	4867	4898	5058	5143				0.0359447	0.0467076	0.0532721	0.0568	0.075226	0.0851656		J	6	0.0556451	0.0812607	0.0846266	0.0321531	0.108646	0.00353336	0
J	7	Sample X223	4767	4532	4576	5323	5273	5391				0.0419832	0.0159925	0.0208024	0.106569	0.100575	0.114783		J	7	0.144733	0.0691923	0.0712761	0.142048	0.143328	-9.36416e-05	0
J	8	Sample X224	4715	4812	4925	4892	4879	4967				0.0361677	0.047046	0.0598837	0.0561161	0.0546361	0.0647013		J	8	0.055868	0.0815991	0.0912383	0.0314692	0.0880556	0.00214584	0
J	9	Sample X225	4185	4557	4764	5020	5276	5568				-0.021061	0.0187223	0.0416467	0.0708165	0.100933	0.136501		J	9	0.0816888	0.0719221	0.0921204	0.106296	0.143687	0.00413321	0
J	10	Sample X226	4718	4680	4675	4715	4714	4768				0.0365022	0.0322741	0.0317193	0.0361677	0.0360562	0.0420954		J	10	0.0562025	0.0668273	0.0630738	0.0115208	0.0694757	0.000884877	0
J	11	Sample X227	4235	4308	4653	4872	4880	5086				-0.0158162	-0.00810249	0.0292819	0.0538402	0.0547499	0.0784886		J	11	0.0869336	0.0450973	0.0797556	0.0893197	0.0975037	0.000704675	0
J	12	Sample X228	4795	4716	4763	4750	4802	4754				0.0451301	0.0362792	0.0415346	0.0400779	0.0459185	0.0405259		J	12	0.0648305	0.0708323	0.0728891	0.015431	0.079338	0.00096717	0
J	13	Sample X229	4222	4264	4613	4505	4639	4789				-0.0171828	-0.0127599	0.0248671	0.0130536	0.0277343	0.0444549		J	13	0.0855669	0.04044	0.0753408	0.0485332	0.0704881	-0.00100525	0
J	14	Sample X230	4442	4424	4444	4514	4465	4412				0.00623337	0.00429422	0.00644909	0.0140322	0.00871729	0.00300379		J	14	0.0259337	0.0388474	0.0378036	-0.0106147	0.0421368	0.0010802	0
J	15	Sample X231	4408	4369	4473	4580	4681	4618				0.00257406	-0.00160502	0.00958288	0.021241	0.0323852	0.0254178		J	15	0.105324	0.0515948	0.0600566	0.0567205	0.075139	-0.00201232	0
J	16	Sample X232	4436	4413	4431	4441	4464	4474				0.00558652	0.00311125	0.00504783	0.00612553	0.00860915	0.00969114		J	16	0.0252869	0.0376644	0.0364024	-0.0185214	0.0420286	0.00111612	0
J	17	Sample X233	3681	3442	3441	3405	3703	3949				-0.0722427	-0.0954892	-0.0955852	-0.0990318	-0.0700706	-0.0454026		J	17	0.0305071	-0.0422894	-0.0451115	-0.0635522	-0.0273167	-0.00385493	0
J	18	Sample X234	4632	4809	4694	4691	4354	5111				0.0269614	0.0467076	0.0338296	0.033496	-0.00320716	0.0814112		J	18	0.0466618	0.0812607	0.0651841	0.00884913	0.0302123	-0.00109663	0
J	19	Sample X235	3817	4036	3858	4280	4104	4404				-0.0587266	-0.0365078	-0.05461	-0.0110691	-0.0294919	0.00214453		J	19	0.0440231	0.016692	-0.00413631	0.0244105	0.0132619	-0.00205075	0
J	20	Sample X236	4313	4298	4289	4310	4319	4324				-0.00757169	-0.00916313	-0.0101166	-0.00789021	-0.00693432	-0.00640282		J	20	0.0121287	0.02539	0.0212379	-0.0325371	0.0264852	0.000957101	0
J	21	Sample X237	3647	3614	3577	3624	3644	3639				-0.0755887	-0.0788238	-0.0824365	-0.0778447	-0.0758833	-0.0763741		J	21	0.0271611	-0.0256239	-0.0319628	-0.0423652	-0.0331294	-0.00401937	0
J	22	Sample X238	4163	4089	4292	4166	4141	4102				-0.0233589	-0.0310444	-0.00979891	-0.0230459	-0.0256508	-0.0296991		J	22	-0.00365854	0.00350874	0.0215556	-0.0476928	0.00776869	0.000761816	0
J	23	Sample X239	3366	3872	3899	4046	3975	3693				-0.10275	-0.0531998	-0.0504737	-0.0354796	-0.0427539	-0.0710586		J	23	0	0	0	0	0	0	0
J	24	Sample X240	4198	4055	4086	4611	4066	4104				-0.0197004	-0.0345531	-0.0313546	0.0246469	-0.0334195	-0.0294919		J	24	0	0	0	0	0	0	0
K	1	Sample X241	4967	5231	5497	5704	5925	6248				0.0647013	0.0955686	0.12773	0.153528	0.181851	0.224768		K	1	0.095125	0.122467	0.16752	0.214156	0.256261	0.0107424	0
K	2	Sample X242	5072	5448	5807	6209	6528	6851				0.0768559	0.121723	0.166627	0.219487	0.263516	0.310112		K	2	0.108727	0.204451	0.252757	0.304064	0.341263	0.0155024	0
K	3	Sample X243	4564	4672	4770	4938	5255	5551				0.0194881	0.0313865	0.0423199	0.0613722	0.0984259	0.134393		K	3	0.0499118	0.0582849	0.0821099	0.122	0.172835	0.00819488	0
K	4	Sample X244	4748	5006	5291	5333	5584	5938				0.039854	0.0691973	0.102728	0.107772	0.138488	0.183543		K	4	0.0717253	0.151926	0.188859	0.19235	0.216235	0.00963399	0
K	5	Sample X245	4129	4240	4419	4675	4898	5115				-0.0268984	-0.01529	0.00375631	0.0317193	0.0568	0.0818797		K	5	0.00352533	0.0116084	0.0435463	0.092347	0.131209	0.00851226	0
K	6	Sample X246	4453	4534	4704	4850	4936	5110				0.00742047	0.0162106	0.0349422	0.0513431	0.061143	0.0812941		K	6	0.0392917	0.0989393	0.121073	0.13592	0.13889	0.00663987	0
K	7	Sample X247	4962	4500	4841	5067	4737	5051				0.0641264	0.0125104	0.0503236	0.0762735	0.0386236	0.0744122		K	7	0.0945502	0.0394088	0.0901136	0.136901	0.113033	0.00123217	0
K	8	Sample X248	4418	4617	4601	4653	4752	4789				0.00364877	0.0253076	0.0235468	0.0292819	0.0403019	0.0444549		K	8	0.03552	0.108036	0.109678	0.113859	0.118049	0.00550191	0
K	9	Sample X249	3969	4165	4055	4431	4553	4647				-0.0433658	-0.0231502	-0.0345531	0.00504783	0.0182849	0.0286183		K	9	-0.0129421	0.00374817	0.00523686	0.0656756	0.0926942	0.00704242	0
K	10	Sample X250	4102	4134	4122	4200	4264	4311				-0.0296991	-0.0263788	-0.0276254	-0.0194908	-0.0127599	-0.00778405		K	10	0.00217215	0.0563499	0.0585056	0.0650865	0.0649869	0.00418765	0
K	11	Sample X251	4156	4022	4054	4182	4418	4413				-0.0240888	-0.0379453	-0.0346561	-0.0213747	0.00364877	0.00311125		K	11	0.00633496	-0.0110469	0.00513388	0.039253	0.078058	0.00478153	0
K	12	Sample X252	4257	4230	4186	4131	4202	4216				-0.0134986	-0.0163421	-0.0209564	-0.0266906	-0.0192813	-0.0178129		K	12	0.0183727	0.0663867	0.0651745	0.0578867	0.0584655	0.00267285	0
K	13	Sample X253	3880	3797	3888	3859	3964	4023				-0.052393	-0.0607277	-0.0515854	-0.0545094	-0.0438755	-0.0378427		K	13	-0.0219692	-0.0338292	-0.0117954	0.00611835	0.0305338	0.0035002	0
K	14	Sample X254	3992	3989	3935	3841	3915	3945				-0.0410176	-0.0413243	-0.0468255	-0.0563193	-0.0488542	-0.0458094		K	14	-0.0091464	0.0414044	0.0393055	0.028258	0.0288926	0.00253593	0
K	15	Sample X255	3360	3275	3287	3327	3373	3417				-0.10332	-0.111362	-0.110231	-0.106451	-0.102084	-0.0978845		K	15	-0.0728966	-0.0844633	-0.0704411	-0.0458237	-0.0276745	0.00301481	0
K	16	Sample X256	3578	3614	3620	3627	3607	3611				-0.082339	-0.0788238	-0.0782365	-0.0775508	-0.0795084	-0.0791173		K	16	-0.0504678	0.00390496	0.00789446	0.00702654	-0.00176167	0.00324707	0
K	17	Sample X257	3355	3294	3464	3259	3344	3350				-0.103795	-0.109571	-0.0933758	-0.112867	-0.10484	-0.10427		K	17	-0.0733717	-0.0826725	-0.0535858	-0.052239	-0.0304307	0.00286274	0
K	18	Sample X258	3860	3907	4006	3919	3926	4007				-0.0544087	-0.0496643	-0.0395852	-0.0484488	-0.047739	-0.0394828		K	18	-0.0225375	0.0330644	0.0465457	0.0361285	0.0300078	0.00350302	0
K	19	Sample X259	4062	3676	3629	3686	3633	4348				-0.0338319	-0.0727355	-0.0773548	-0.0717495	-0.0769626	-0.00384721		K	19	-0.00340815	-0.0458371	-0.0375648	-0.0111218	-0.00255341	5.69822e-05	0
K	20	Sample X260	3900	3851	3813	3768	3757	3785				-0.0503726	-0.0553142	-0.0591272	-0.0636209	-0.0647158	-0.061926		K	20	-0.0185013	0.0274145	0.0270037	0.0209564	0.013031	0.00210215	0
K	21	Sample X261	3254	3278	3274	3297	3503	3284				-0.113337	-0.111079	-0.111456	-0.109288	-0.0896162	-0.110514		K	21	-0.0829128	-0.0841807	-0.0716658	-0.04866	-0.015207	0.00451372	0
K	22	Sample X262	3771	3803	3670	3679	3661	3651				-0.063322	-0.0601278	-0.0733266	-0.0724398	-0.0742125	-0.0751957		K	22	-0.0314508	0.0226009	0.0128043	0.0121375	0.00353428	0.00233234	0
K	23	Sample X263	4095	4129	4004	3798	3659	3464				-0.0304237	-0.0268984	-0.03979	-0.0606277	-0.0744092	-0.0933758		K	23	0	0	0	0	0	0	0
K	24	Sample X264	4081	3574	3539	3555	3625	3673				-0.0318712	-0.0827287	-0.0861309	-0.0845773	-0.0777468	-0.0730311		K	24	0	0	0	0	0	0	0
L	1	Sample X265	6450	6855	7346	7888	8428	8956				0.252572	0.310703	0.385784	0.475168	0.571856	0.674743		L	1	0.207217	0.301012	0.347049	0.455242	0.526726	0.0213006	0
L	2	Sample X266	10266	13812	16370	18285	19605	20450				0.973516	2.32477	4.57061	8.97082	18.7894	47.7168		L	2	0.920471	2.27625	4.51824	8.91743	18.7344	1.1876	0
L	3	Sample X267	5711	6145	6612	6967	7279	7933				0.154413	0.210881	0.275433	0.327368	0.375223	0.482922		L	3	0.109058	0.201189	0.236698	0.307442	0.330093	0.0147357	0
L	4	Sample X268	9507	12435	14480	16176	17508	18558				0.792148	1.66795	2.74256	4.31769	6.61201	10.1487		L	4	0.739103	1.61943	2.6902	4.2643	6.55703	0.387862	0
L	5	Sample X269	6152	6568	6959	7203	7705	8439				0.211818	0.269174	0.326169	0.363368	0.444177	0.573912		L	5	0.166463	0.259482	0.287434	0.343442	0.399047	0.0155056	0
L	6	Sample X270	7560	9591	11292	12600	13985	15109				0.420218	0.811038	1.26353	1.73536	2.42539	3.22183		L	6	0.367173	0.762524	1.21117	1.68198	2.37041	0.133549	0
L	7	Sample X271	6100	6664	6799	6999	7714	8360				0.204873	0.28288	0.302468	0.332179	0.445681	0.559228		L	7	0.159518	0.273189	0.263733	0.312253	0.400551	0.0160689	0
L	8	Sample X272	6662	7937	9053	10015	11028	11857				0.282593	0.483613	0.69463	0.910777	1.18323	1.45087		L	8	0.229548	0.4351	0.642266	0.857391	1.12826	0.0599138	0
L	9	Sample X273	5823	5974	5859	6294	6965	7405				0.168677	0.188244	0.173307	0.231033	0.327068	0.39517		L	9	0.123322	0.178553	0.134571	0.211107	0.281938	0.0105744	0
L	10	Sample X274	5979	6712	7391	7997	8553	9082				0.188898	0.289803	0.392935	0.494041	0.595428	0.700637		L	10	0.135853	0.241289	0.340571	0.440655	0.540451	0.0269732	0
L	11	Sample X275	5951	6347	6730	6461	6833	7221				0.185238	0.238299	0.29241	0.254109	0.30746	0.366164		L	11	0.139883	0.228608	0.253675	0.234183	0.26233	0.00816313	0
L	12	Sample X276	5629	6447	6357	6668	6988	7335				0.144101	0.252154	0.239676	0.283455	0.330523	0.384043		L	12	0.091056	0.20364	0.187313	0.23007	0.275545	0.0122993	0
L	13	Sample X277	4917	5225	5529	5383	5594	5823				0.0589689	0.0948556	0.131673	0.113813	0.139733	0.168677		L	13	0.0136137	0.0851645	0.0929374	0.0938866	0.0946027	0.00539927	0
L	14	Sample X278	5701	5554	5750	6070	6011	5966				0.15315	0.134765	0.159356	0.200888	0.193098	0.187197		L	14	0.100105	0.086251	0.106992	0.147503	0.138121	0.0025344	0
L	15	Sample X279	5240	5332	5508	5469	5664	5726				0.096639	0.107652	0.129083	0.124292	0.148489	0.156311		L	15	0.0512838	0.0979607	0.0903478	0.104366	0.103359	0.00347168	0
L	16	Sample X280	5116	5191	5285	5468	5491	5718				0.0819969	0.0908257	0.10201	0.12417	0.126992	0.155298		L	16	0.0289519	0.0423119	0.0496459	0.0707843	0.0720145	0.00287084	0
L	17	Sample X281	4168	4228	4435	4273	4294	4364				-0.0228372	-0.0165523	0.00547876	-0.0118092	-0.00958704	-0.00213939		L	17	-0.0681925	-0.0262435	-0.0332566	-0.0317352	-0.0547171	0.000898355	0
L	18	Sample X282	5336	5238	5422	5372	5340	5634				0.108134	0.0964011	0.118551	0.11248	0.108616	0.144727		L	18	0.0550887	0.0478873	0.0661869	0.0590947	0.0536382	-9.67014e-05	0
L	19	Sample X283	5942	5781	5715	5768	5745	5767				0.184064	0.163304	0.154919	0.161646	0.158721	0.161519		L	19	0.138709	0.153612	0.116183	0.14172	0.113591	-0.00167455	0
L	20	Sample X284	6315	6313	6098	5939	6116	6039				0.233906	0.233632	0.204607	0.183674	0.207005	0.196788		L	20	0.180861	0.185118	0.152243	0.130288	0.152028	-0.00192222	0
L	21	Sample X285	5144	4717	4555	4468	4513	4521				0.0852832	0.0363907	0.0185036	0.00904179	0.0139234	0.014794		L	21	0.0399279	0.0266995	-0.0202318	-0.0108842	-0.0312067	-0.00474231	0
L	22	Sample X286	4966	4972	4991	4998	5019	5032				0.0645863	0.0652764	0.0674654	0.0682732	0.0707008	0.0722068		L	22	0.0115413	0.0167626	0.0151016	0.0148876	0.0157234	0.000278801	0
L	23	Sample X287	4797	4474	4738	4568	4795	4926				0.0453553	0.00969114	0.0387354	0.019926	0.0451301	0.0599981		L	23	0	0	0	0	0	0	0
L	24	Sample X288	4865	4825	4859	4868	4882	5191				0.0530449	0.0485138	0.0523638	0.0533857	0.0549774	0.0908257		L	24	0	0	0	0	0	0	0
M	1	Sample X289	7723	9474	10827	12030	13092	14024				0.447187	0.784802	1.12488	1.51293	1.95298	2.44875		M	1	0.436521	0.745395	1.12209	1.47542	1.88297	0.0964302	0
M	2	Sample X290	8165	10540	12455	13910	15001	15849				0.523753	1.04542	1.67598	2.38117	3.13245	3.93407		M	2	0.498776	1.02769	1.62871	2.32265	3.11165	0.174192	0
M	3	Sample X291	7191	8510	9609	10262	11055	12347				0.361508	0.587267	0.815122	0.972493	1.19125	1.63304		M	3	0.350842	0.54786	0.812333	0.934987	1.12124	0.0513601	0
M	4	Sample X292	6910	8618	9752	10951	12014	13058				0.318854	0.607873	0.848029	1.1606	1.50709	1.93708		M	4	0.293877	0.590135	0.800757	1.10209	1.48629	0.0794939	0
M	5	Sample X293	6541	7631	8501	9543	10546	11312				0.265351	0.431885	0.585565	0.80021	1.04704	1.26979		M	5	0.254685	0.392478	0.582776	0.762703	0.977035	0.0481567	0
M	6	Sample X294	6221	7272	8087	8981	9797	10576				0.221109	0.374126	0.509862	0.679838	0.858557	1.05515		M	6	0.196132	0.356387	0.462591	0.621326	0.837755	0.0427749	0
M	7	Sample X295	6816	7116	9114	9646	10371	10550				0.304961	0.349955	0.707301	0.823557	1.00064	1.04812		M	7	0.294295	0.310548	0.704512	0.786051	0.93063	0.0424223	0
M	8	Sample X296	5558	6322	6605	7869	7717	8543				0.13526	0.234865	0.274435	0.471911	0.446183	0.593525		M	8	0.110283	0.217127	0.227163	0.413399	0.425381	0.0210065	0
M	9	Sample X297	6218	6660	7353	8080	8816	9367				0.220703	0.282306	0.386893	0.508624	0.646597	0.761268		M	9	0.210037	0.242899	0.384104	0.471117	0.576591	0.0244369	0
M	10	Sample X298	5410	5729	5979	6290	6613	6937				0.11709	0.156691	0.188898	0.230486	0.275576	0.322878		M	10	0.0921132	0.138953	0.141627	0.171975	0.254773	0.010844	0
M	11	Sample X299	5497	6127	6809	7394	7909	8447				0.12773	0.208473	0.303934	0.393414	0.47878	0.575409		M	11	0.117063	0.169067	0.301145	0.355907	0.408773	0.0194473	0
M	12	Sample X300	5502	5638	5650	5767	5953	6081				0.128345	0.145227	0.146731	0.161519	0.185499	0.202348		M	12	0.103367	0.127489	0.0994597	0.103007	0.164697	0.00408862	0
M	13	Sample X301	5414	5439	6186	6275	6647	7011				0.117577	0.120624	0.216385	0.22844	0.28044	0.333988		M	13	0.106911	0.0812172	0.213597	0.190934	0.210433	0.00690149	0
M	14	Sample X302	5096	5183	5193	5248	5323	5409				0.0796565	0.0898799	0.0910622	0.0975916	0.106569	0.116969		M	14	0.0546793	0.0721414	0.0437906	0.0390797	0.0857664	0.00207247	0
M	15	Sample X303	4542	4649	4869	5129	5318	5543				0.0170834	0.0288395	0.0534993	0.0835212	0.105968	0.133403		M	15	0.00641737	-0.0105669	0.0507104	0.0460148	0.0359612	0.00196959	0
M	16	Sample X304	5045	5052	5039	5090	5133	5157				0.0737152	0.0745284	0.0730187	0.0789556	0.0839908	0.0868129		M	16	0.048738	0.0567898	0.025747	0.0204437	0.0631883	0.000963357	0
M	17	Sample X305	4424	4523	4591	4700	4821	4942				0.00429422	0.0150118	0.0224481	0.034497	0.0480619	0.0618307		M	17	-0.00637182	-0.0243946	0.0196592	-0.00300946	-0.0219446	-0.00103819	0
M	18	Sample X306	4719	4886	4834	4932	5162	4937				0.0366137	0.0554327	0.0495314	0.0606849	0.087402	0.0612576		M	18	0.0116365	0.0376941	0.00225969	0.00217301	0.0665995	0.0036642	0
M	19	Sample X307	4430	4493	4568	4582	4639	4676				0.00494014	0.0117505	0.019926	0.0214603	0.0277343	0.0318302		M	19	-0.00572591	-0.0276559	0.0171371	-0.0160461	-0.0422723	-0.00243642	0
M	20	Sample X308	4832	4812	4740	4758	4807	4842				0.0493051	0.047046	0.038959	0.040974	0.0464821	0.0504368		M	20	0.024328	0.0293074	-0.00831268	-0.0175379	0.0256797	9.01138e-05	0
M	21	Sample X309	4332	4356	4360	4408	4429	4463				-0.00555177	-0.00299371	-0.00256665	0.00257406	0.00483245	0.00850102		M	21	-0.0162178	-0.0424001	-0.00535555	-0.0349324	-0.0651741	-0.00326375	0
M	22	Sample X310	4439	4564	4576	4492	4510	4615				0.00590988	0.0194881	0.0208024	0.011642	0.0135971	0.0250873		M	22	-0.0190673	0.00174949	-0.0264692	-0.0468699	-0.00720531	0.0007908	0
M	23	Sample X311	4483	4744	4410	4727	5013	4181				0.010666	0.0394064	0.00278889	0.0375064	0.0700065	-0.0214793		M	23	0	0	0	0	0	0	0
M	24	Sample X312	4614	4548	4814	4913	4576	4624				0.0249772	0.0177386	0.0472717	0.0585119	0.0208024	0.026079		M	24	0	0	0	0	0	0	0
N	1	Sample X313	4478	5213	5946	6632	7232	7737				0.0101243	0.0934313	0.184586	0.278291	0.367876	0.449535		N	1	0.0577618	0.149449	0.250991	0.346184	0.435174	0.0251608	0
N	2	Sample X314	7861	10383	12259	13501	14645	15640				0.470542	1.00377	1.59883	2.15548	2.85918	3.71317		N	2	0.42451	1.00098	1.59389	2.14741	2.85284	0.161888	0
N	3	Sample X315	5768	6649	7227	8186	9038	9778				0.161646	0.280727	0.367097	0.527522	0.691533	0.854102		N	3	0.209284	0.336745	0.433503	0.595415	0.758832	0.0366365	0
N	4	Sample X316	7306	9239	10642	11960	13129	14060				0.379467	0.733675	1.07316	1.48753	1.97044	2.47056		N	4	0.333436	0.730887	1.06822	1.47946	1.9641	0.108711	0
N	5	Sample X317	4608	5344	5558	6360	6964	7445				0.0243167	0.109098	0.13526	0.24009	0.326918	0.401579		N	5	0.0719543	0.165116	0.201666	0.307983	0.394217	0.0214842	0
N	6	Sample X318	5882	7025	8057	8943	9801	10555				0.176276	0.336103	0.504564	0.672102	0.859497	1.04947		N	6	0.130245	0.333314	0.499624	0.664034	0.853156	0.0481941	0
N	7	Sample X319	5723	6614	6987	7898	8571	9136				0.155931	0.275719	0.330372	0.476887	0.598862	0.711903		N	7	0.203569	0.331737	0.396777	0.54478	0.66616	0.0308394	0
N	8	Sample X320	5716	6392	7423	7840	8438	8914				0.155045	0.244511	0.398049	0.466956	0.573725	0.666231		N	8	0.109014	0.241722	0.393109	0.458888	0.567384	0.030558	0
N	9	Sample X321	5277	6109	6749	7193	7958	8539				0.101053	0.206072	0.29517	0.361817	0.487252	0.592765		N	9	0.14869	0.26209	0.361575	0.42971	0.55455	0.0270573	0
N	10	Sample X322	5132	5343	5965	6253	6351	6889				0.0838734	0.108977	0.187066	0.225447	0.23885	0.315734		N	10	0.0378422	0.106188	0.182126	0.217378	0.232509	0.0129778	0
N	11	Sample X323	4542	5118	5454	6001	6384	6808				0.0170834	0.0822312	0.122456	0.191784	0.243404	0.303787		N	11	0.0647209	0.138249	0.188861	0.259677	0.310702	0.0163987	0
N	12	Sample X324	4631	4814	5003	5219	5395	5553				0.0268511	0.0472717	0.0688506	0.0941432	0.115268	0.134641		N	12	-0.0191801	0.0444828	0.0639105	0.0860745	0.108927	0.00854046	0
N	13	Sample X325	4744	5078	5454	5832	6204	6726				0.0394064	0.0775552	0.122456	0.169832	0.218812	0.29183		N	13	0.0870439	0.133573	0.188861	0.237725	0.28611	0.0132711	0
N	14	Sample X326	4219	4348	4485	4575	4662	4724				-0.0174979	-0.00384721	0.0108828	0.0206928	0.0302782	0.0371716		N	14	-0.0635291	-0.00663611	0.0059427	0.0126242	0.023937	0.00583108	0
N	15	Sample X327	3341	3582	3737	3869	3996	4180				-0.105125	-0.0819492	-0.066703	-0.0535022	-0.0406086	-0.0215838		N	15	-0.057487	-0.0259313	-0.000297781	0.0143908	0.0266896	0.00561177	0
N	16	Sample X328	4125	4166	4396	4140	4215	4224				-0.0273139	-0.0230459	0.0012861	-0.0257548	-0.0179179	-0.0169727		N	16	-0.0733451	-0.0258348	-0.00365404	-0.0338235	-0.0242591	0.0032724	0
N	17	Sample X329	4249	4311	4338	4450	4788	4650				-0.014342	-0.00778405	-0.00491294	0.00709656	0.0443424	0.0289501		N	17	0.0332955	0.0482338	0.0614922	0.0749896	0.111641	0.00522301	0
N	18	Sample X330	4673	4554	4717	4775	4745	4857				0.0314974	0.0183943	0.0363907	0.0428812	0.0395183	0.0521369		N	18	-0.0145338	0.0156054	0.0314505	0.0348126	0.0331771	0.00318072	0
N	19	Sample X331	4008	4015	4062	4110	4179	4224				-0.0393804	-0.0386631	-0.0338319	-0.0288702	-0.0216883	-0.0169727		N	19	0.00825714	0.0173548	0.0325733	0.0390229	0.0456099	0.00249018	0
N	20	Sample X332	4653	4656	4679	4818	4676	4609				0.0292819	0.0296139	0.0321631	0.0477232	0.0318302	0.0244268		N	20	-0.0167493	0.026825	0.027223	0.0396545	0.025489	0.00281589	0
N	21	Sample X333	4364	4044	4019	4027	4064	4074				-0.00213939	-0.0356853	-0.038253	-0.0374322	-0.0336257	-0.0325941		N	21	0.0454981	0.0203326	0.0281522	0.0304609	0.0336725	-0.000788376	0
N	22	Sample X334	4724	4710	4357	4340	4390	4308				0.0371716	0.0356104	-0.00288697	-0.0046999	0.000642819	-0.00810249		N	22	-0.00885965	0.0328215	-0.0078271	-0.0127685	-0.0056984	0.00021075	0
N	23	Sample X335	3927	3844	3740	3725	3731	3765				-0.0476375	-0.0560179	-0.0664052	-0.0678931	-0.0672982	-0.0639196		N	23	0	0	0	0	0	0	0
N	24	Sample X336	4803	4410	4430	4459	4443	4405				0.0460312	0.00278889	0.00494014	0.00806865	0.00634122	0.00225189		N	24	0	0	0	0	0	0	0
O	1	Sample X337	8491	10238	11462	12814	13875	14699				0.583678	0.966373	1.31758	1.82682	2.36085	2.89866		O	1	0.47783	0.857275	1.21125	1.71953	2.25127	0.118229	0
O	2	Sample X338	9376	12531	14616	16053	17077	17887				0.763231	1.70685	2.83825	4.1675	5.70131	7.61784		O	2	0.818646	1.76317	2.89266	4.22392	5.75652	0.329192	0
O	3	Sample X339	8587	9895	10991	12331	13358	14150				0.601922	0.88178	1.17232	1.62677	2.08223	2.52606		O	3	0.496074	0.772682	1.06599	1.51947	1.97265	0.0984383	0
O	4	Sample X340	7117	9249	10933	12223	13271	13960				0.350108	0.73581	1.15536	1.58503	2.03898	2.41054		O	4	0.405523	0.792129	1.20977	1.64145	2.0942	0.112578	0
O	5	Sample X341	7162	8178	9234	10421	11366	12224				0.357026	0.526085	0.73261	1.01374	1.28682	1.58541		O	5	0.251178	0.416987	0.626281	0.906448	1.17724	0.0617376	0
O	6	Sample X342	6501	7936	9293	10419	11472	12304				0.259714	0.48344	0.745243	1.01321	1.32081	1.61623		O	6	0.315129	0.53976	0.799652	1.06963	1.37603	0.0707266	0
O	7	Sample X343	7118	7805	8775	10083	11091	11729				0.350261	0.461006	0.638476	0.92749	1.20201	1.40644		O	7	0.244414	0.351908	0.532148	0.8202	1.09243	0.0565342	0
O	8	Sample X344	5677	6509	7372	8135	8867	9493				0.150124	0.260839	0.38991	0.518391	0.656776	0.789026		O	8	0.205539	0.317159	0.444319	0.57481	0.711989	0.0337634	0
O	9	Sample X345	6688	7373	8277	9313	10153	10880				0.286336	0.390069	0.543996	0.749554	0.944913	1.14004		O	9	0.180488	0.280971	0.437668	0.642263	0.835333	0.0436563	0
O	10	Sample X346	5279	5875	6342	6768	7223	7555				0.101292	0.175371	0.237612	0.297937	0.366475	0.419401		O	10	0.156707	0.231691	0.29202	0.354357	0.421689	0.0176655	0
O	11	Sample X347	6387	7208	7815	8520	9079	9657				0.243819	0.364144	0.462703	0.58916	0.700015	0.826076		O	11	0.137971	0.255046	0.356375	0.481869	0.590434	0.0301642	0
O	12	Sample X348	4816	5097	5298	5543	5850	6158				0.0474974	0.0797734	0.103567	0.133403	0.172147	0.212623		O	12	0.102912	0.136093	0.157976	0.189823	0.227361	0.00829658	0
O	13	Sample X349	5968	6308	6810	7304	7793	8206				0.187459	0.232947	0.30408	0.379152	0.458973	0.531123		O	13	0.0816112	0.123849	0.197752	0.271861	0.349393	0.0178521	0
O	14	Sample X350	4757	4797	4964	5070	5201	5293				0.040862	0.0453553	0.0643563	0.0766229	0.0920091	0.102968		O	14	0.0962768	0.101675	0.118765	0.133043	0.147223	0.0033964	0
O	15	Sample X351	5436	5759	6078	6380	6648	6838				0.120257	0.160501	0.20195	0.242851	0.280583	0.308196		O	15	0.0144099	0.0514027	0.0956212	0.13556	0.171003	0.0104395	0
O	16	Sample X352	4721	4749	4789	4804	4876	4921				0.0368368	0.039966	0.0444549	0.0461439	0.0542949	0.0594262		O	16	0.0922516	0.0962852	0.0988636	0.102564	0.109509	0.00115046	0
O	17	Sample X353	5613	5826	5878	6099	6295	6445				0.142102	0.169062	0.175759	0.20474	0.231169	0.251875		O	17	0.0362541	0.0599642	0.0694306	0.0974494	0.121589	0.00568899	0
O	18	Sample X354	4369	4356	4410	4429	4463	4498				-0.00160502	-0.00299371	0.00278889	0.00483245	0.00850102	0.0122932		O	18	0.0538098	0.0533256	0.0571976	0.0612522	0.0637147	0.000660328	0
O	19	Sample X355	5577	5703	5717	5835	5954	6047				0.137618	0.153402	0.155172	0.170218	0.18563	0.197844		O	19	0.0317707	0.0443042	0.0488435	0.0629271	0.0760493	0.0029519	0
O	20	Sample X356	4387	4230	4223	4237	4314	4327				0.000321351	-0.0163421	-0.0170778	-0.0156057	-0.0074655	-0.00608377		O	20	0.0557362	0.0399772	0.0373309	0.040814	0.0477482	-0.000532532	0
O	21	Sample X357	5499	5565	5456	5547	5611	5697				0.127976	0.136128	0.122701	0.133898	0.141852	0.152645		O	21	0.022128	0.0270306	0.0163725	0.0266073	0.0322717	0.000676247	0
O	22	Sample X358	4505	4452	4487	4503	4487	4534				0.0130536	0.00731249	0.0110997	0.0128363	0.0110997	0.0162106		O	22	0.0684684	0.0636318	0.0655084	0.069256	0.0663133	-0.000143671	0
O	23	Sample X359	5317	5344	5321	5329	5348	5344				0.105848	0.109098	0.106328	0.107291	0.10958	0.109098		O	23	0	0	0	0	0	0	0
O	24	Sample X360	3850	3841	3860	3840	3852	3859				-0.0554148	-0.0563193	-0.0544087	-0.0564197	-0.0552137	-0.0545094		O	24	0	0	0	0	0	0	0
P	1	Sample X361	19831	19775	19852	19961	20025	20111					16	20111	19512		59.9469		P	1	0	16	15641	14488	0		1			13213	#DIV/0!
P	2	Sample X362	19565	19515	19517	19467	19513	19512									25.6596		P	2	0	0	0	0	0
P	3	Sample X363	19957	19902	19852	19931	19937	19910					8	19910	18515		41.7173		P	3	0	8	15440	13491	0		0.5			12811	#DIV/0!
P	4	Sample X364	18191	18279	18740	18511	18554	18515									12.4644		P	4	0	0	0	0	0
P	5	Sample X365	16518	16244	16184	16167	16142	16151					4	16151	17237		4.86107		P	5	0	4	11681	12213	0		0.25			11130.7	#DIV/0!
P	6	Sample X366	16933	17235	17377	17330	17291	17237									7.02306		P	6	0	0	0	0	0		0
P	7	Sample X367	14247	14611	14577	14613	14549	14580					2	14580	13554		3.11599		P	7	0	2	10110	8530	0		0.125			9378.67	#DIV/0!
P	8	Sample X368	13165	13188	13366	13316	13339	13554									2.3969		P	8	0	0	0	0	0
P	9	Sample X369	10043	10121	10556	10304	10320	10222					1	10222	10589		1.04312		P	9	0	1	5752	5565	0		0.0625			6937.33	#DIV/0!
P	10	Sample X370	10385	10517	10524	10553	10543	10589									1.14803		P	10	0	0	0	0	0
P	11	Sample X371	7953	8000	8162	8124	8103	8100					0.5	8100	8184		0.557405		P	11	0	0.5	3630	3160	0		0.03125			5428.17	#DIV/0!
P	12	Sample X372	8130	8205	8205	8195	8198	8184									0.573474		P	12	0	0	0	0	0
P	13	Sample X373	6732	6568	6720	6837	6763	6926					0.25	6926	6568		0.353499		P	13	0	0.25	2456	1544	0		0.015625			4498.08	#DIV/0!
P	14	Sample X374	7211	6711	7225	6737	6656	6568									0.298113		P	14	0	0	0	0	0
P	15	Sample X375	5416	5523	5465	5478	5462	5429					0.125	5429	5600		0.139296		P	15	0	0.125	959	576	0		0			3676.38	#DIV/0!
P	16	Sample X376	5544	5607	5582	5620	5628	5600									0.1616		P	16	0	0	0	0	0
P	17	Sample X377	4973	5083	4965	5324	5127	5102					0.0625	5102	5084		0.0980164		P	17	0	0.0625	632	60	0
P	18	Sample X378	5015	5061	5014	5237	4957	5084									0.0957947		P	18	0	0	0	0	0
P	19	Sample X379	4698	4878	4966	4913	4931	4924					0.03125	4924	4819		0.0762704		P	19	0	0.03125	454	-205	0
P	20	Sample X380	4739	4767	4819	5122	4916	4819									0.0636728		P	20	0	0	0	0	0
P	21	Sample X381	4315	4330	4395	4451	4507	4487					0.015625	4487	5320		0.0249215		P	21	0	0.015625	17	296	0
P	22	Sample X382	5049	5104	4742	5427	5081	5320									0.12534		P	22	0	0	0	0	0
P	23	Sample X383	4382	4359	4450	4495	4496	4470					0	4470	5024		0.0229802		P	23	0	0	0	0	0
P	24	Sample X384	5056	5006	4909	4911	5359	5024									0.088426		P	24	0	0	0	0	0
[truncated: 12 more columns]
