# Supplementary material for: PDZ-directed substrate recruitment is the primary determinant of specific 4E-BP1 dephosphorylation by PP1-Neurabin
Source: eLife journal article supplement (doi:10.7554/elife.103403), 2024-11-20
Supplement: fig5-data1 [file Assay rep4a.xlsx]

## Sheet: All Cycles
Well Row	Well Col	Content	Raw Data (425-10/460-20)	Raw Data (425-10/460-20)	Raw Data (425-10/460-20)	Raw Data (425-10/460-20)	Raw Data (425-10/460-20)	Raw Data (425-10/460-20)			Content	Raw Data (425-10/460-20)	Raw Data (425-10/460-20)	Raw Data (425-10/460-20)	Raw Data (425-10/460-20)	Raw Data (425-10/460-20)	Raw Data (425-10/460-20)	Content	Well Row	Well Col	Raw Data (425-10/460-20)	Raw Data (425-10/460-20)	Raw Data (425-10/460-20)	Raw Data (425-10/460-20)	Raw Data (425-10/460-20)						PP1-Neb 0.25nM																PP1-Ph1 1.25 nM
		Time [s]	0	180	360	540	720	900			Time [s]	0	180	360	540	720	900	Time [s]			0	4	8	12	16						4EBP-70-PDZ	4EBP-70-SGS	IRSp53-PDZ	IRSp53-SGS	4EBP-101-PDZ	4EBP-101-SGS	L5A-PDZ	L5A-SGS	V1	V2	V3	V5	V6	V7	V8		4EBP-70-PDZ	4EBP-70-SGS	IRSp53-PDZ
A	1	Sample X1	4020	4443	4807	5041	5422	5739				-0.0381504	0.00634122	0.0464821	0.0732508	0.118551	0.157959		A	1	0.0130309	0.058936	0.101897	0.135576	0.174669	0.0107759	0			400	0.0107759	0.00149376	0.0206358	0.00106082	-0.00148364	0.000193823	0.0296276	-4.00892e-05	0.0327294	0.0204599	0.00746348	0.0184605	0.0563598	0.0533386	0.0569464		0.0145258	0.00181427	0.0169486
A	2	Sample X2	4015	4580	4915	5456	5890	6255				-0.0386631	0.021241	0.0587404	0.122701	0.177311	0.225719		A	2	0.136979	0.200444	0.234208	0.302164	0.354866	0.0145258	0			200	0.00861871	0.00544897	0.0286144	0.0012895	-0.00611217	0.000782225	0.0203592	0.00123619	0.0221951	0.0172206	0.0075895	0.0181742	0.0821204	0.0434013	0.0490915		0.00670241	0.000462395	0.0180296
A	3	Sample X3	4627	4829	5079	5357	5682	6017				0.0264098	0.0489659	0.0776719	0.110667	0.150753	0.193888		A	3	0.0775911	0.101561	0.133087	0.172992	0.206872	0.00861871	0			100	0.00583173	-0.00150929	0.0173475	-0.000261049	-0.00327792	-0.000749117	0.0195249	0.000569139	0.0191508	0.0145888	0.00872297	0.0154159	0.0660864	0.0369177	0.0387377		0.00273854	0.00017314	0.0168833
A	4	Sample X4	3983	3888	4195	4440	4897	4985				-0.0419373	-0.0515854	-0.0200145	0.0060177	0.056686	0.0667736		A	4	0.133705	0.127618	0.155453	0.185481	0.234241	0.00670241	0			50	0.00713695	0.00134467	0.0174432	0.000885432	-0.00274169	4.30304e-05	0.0158783	-0.00162159	0.0140174	0.0119652	0.00718433	0.0136709	0.0579263	0.0344856	0.0329015		-0.00193496	0.00087967	0.0147125
A	5	Sample X5	4519	4638	4834	5054	5244	5533				0.0145763	0.0276238	0.0495314	0.0747609	0.0971152	0.132167		A	5	0.0657576	0.0802186	0.104946	0.137086	0.153234	0.00583173	0			25	0.00390627	-0.000863412	0.0173208	0.000373	-0.00150552	-0.000408319	0.0150948	-0.000902201	0.0161539	0.00958902	0.00614113	0.0110877	0.0431365	0.0257437	0.0287066		0.00113418	-0.000371898	0.014207
A	6	Sample X6	3508	3573	3663	3745	3904	4078				-0.089133	-0.0828261	-0.0740157	-0.0659086	-0.0499679	-0.0321811		A	6	0.0865088	0.0963772	0.101452	0.113555	0.127587	0.00273854	0			12.5	0.00286171	-2.81068e-05	0.0138994	-0.000317632	-0.00205751	-0.00143791	0.0101041	-0.000306802	0.0106385	0.00575404	0.00519038	0.00720736	0.0310491	0.0238105	0.0220988		0.00118983	-2.22323e-05	0.0119277
A	7	Sample X7	4035	4303	4548	4710	4974	5129				-0.0366105	-0.00863297	0.0177386	0.0356104	0.0655066	0.0835212		A	7	0.0145708	0.0439618	0.0731534	0.0979356	0.121625	0.00713695	0			6.25	0.0014687	0.000195419	0.0091888	-0.000784215	-0.000102267	0.000382621	0.00490028	-5.03383e-05	0.00540579	0.00384538	0.00221872	0.0037707	0.0179949	0.0132776	0.0145963		0.000703434	-0.000218532	0.00988594
A	8	Sample X8	4839	4260	4265	4563	4561	3949				0.0500972	-0.0131821	-0.0126543	0.0193786	0.0191598	-0.0454026		A	8	0.225739	0.166021	0.162813	0.198842	0.196715	-0.00193496	0			3.125	-0.00026748	0.000146373	0.00525952	-0.00260748	-0.00152857	0.000626925	0.00255868	-0.000348509	0.0021397	0.00126744	0.00119344	0.00158086	0.00694242	0.00750123	0.00737931		0.000367967	0.001946	0.00719848
A	9	Sample X9	4304	4491	4478	4647	4795	4965				-0.0085269	0.0115335	0.0101243	0.0286183	0.0451301	0.0644713		A	9	0.0426544	0.0641283	0.0655391	0.0909435	0.101248	0.00390627	0			1.5625	-0.000225355	-0.000822548	0.00333614	-0.000621864	-0.00408976	-0.000242479	0.000717863	0.000322051	0.00159463	-0.000976959	0.000611346	0.00103748	0.00373045	0.00302201	0.00451645		-0.000574611	-0.00129764	0.00480159
A	10	Sample X10	3328	3329	3376	3439	3486	3527				-0.106357	-0.106262	-0.101798	-0.095777	-0.091257	-0.0872943		A	10	0.0692851	0.0729413	0.0736697	0.0836863	0.0862978	0.00113418	0			0.78125	-0.000685799	-0.00101539	-0.000763109	-0.000622687	-0.0017049	0.00155213	0.00212097	0.00033854	0.000294076	-0.00186587	-0.000445576	0.000724197	0.00164811	0.00138789	0.00264749		-0.000260581	0.000238819	0.00287291
A	11	Sample X11	4489	4496	4587	4604	4832	4852				0.0113166	0.0120761	0.0220089	0.0238767	0.0493051	0.0515698		A	11	0.0624979	0.0646709	0.0774237	0.0862018	0.105424	0.00286171	0			0.390625	-8.73782e-05	-0.000501151	-0.000123049	-0.00148209	-0.00209792	0.00153586	0.00186239	-0.00247028	-0.000895705	-0.000195538	6.22006e-05	0.000857647	0.000284531	0.00059362	0.00150862		-9.15618e-05	0.000334408	0.00193495
A	12	Sample X12	3203	3348	3334	3332	3372	3377				-0.118113	-0.10446	-0.105788	-0.105978	-0.102179	-0.101703		A	12	0.0575286	0.0747431	0.0696795	0.0734855	0.075376	0.00118983	0			0	0	0	0	0	0	0	0	0	0	0	0	0	0	0	0		0	0	0
A	13	Sample X13	4336	4358	4432	4495	4495	4528				-0.00512593	-0.00278021	0.00515554	0.0119676	0.0119676	0.0155565		A	13	0.0460554	0.0498146	0.0605703	0.0742927	0.0680859	0.0014687	0
A	14	Sample X14	2820	2957	2900	2937	2916	2931				-0.153131	-0.140776	-0.145939	-0.142591	-0.144493	-0.143135		A	14	0.0225104	0.0384277	0.0295286	0.0368722	0.0330619	0.000703434	0				3	27	51	75	99	123	147	171	195	219	243	267	291	315	339		3	27	51
A	15	Sample X15	4088	4142	4129	4071	4001	4123				-0.0311478	-0.0255468	-0.0268984	-0.0329037	-0.0400971	-0.0275216		A	15	0.0200335	0.027048	0.0285164	0.0294214	0.0160213	-0.00026748	0				PP1-Neb 0.25nM																PP1-Ph1 1.25 nM
A	16	Sample X16	2866	2919	2902	2896	2906	2943				-0.149004	-0.144222	-0.145758	-0.1463	-0.145397	-0.142047		A	16	0.0266383	0.0349818	0.0297093	0.0331631	0.0321578	0.000367967	0				4EBP-70-PDZ	4EBP-70-SGS	IRSp53-PDZ	IRSp53-SGS	4EBP-101-PDZ	4EBP-101-SGS	L5A-PDZ	L5A-SGS	V1	V2	V3	V5	V6	V7	V8		4EBP-70-PDZ	4EBP-70-SGS	IRSp53-PDZ
A	17	Sample X17	4070	4054	4071	4020	3989	4026				-0.0330069	-0.0346561	-0.0329037	-0.0381504	-0.0413243	-0.0375348		A	17	0.0181744	0.0179387	0.0225111	0.0241747	0.0147941	-0.000225355	0		0	400	0.0107759	0.00149376	0.0206358	0.00106082	-0.00148364	0.000193823	0.0296276	-4.00892e-05	0.0327294	0.0204599	0.00746348	0.0184605	0.0563598	0.0533386	0.0569464		0.0145258	0.00181427	0.0169486
A	18	Sample X18	3163	3145	3121	3063	3049	3025				-0.121841	-0.123513	-0.125736	-0.131087	-0.132373	-0.134573		A	18	0.0538012	0.0556908	0.0497312	0.0483767	0.045182	-0.000574611	0		2	200	0.00861871	0.00544897	0.0286144	0.0012895	-0.00611217	0.000782225	0.0203592	0.00123619	0.0221951	0.0172206	0.0075895	0.0181742	0.0821204	0.0434013	0.0490915		0.00670241	0.000462395	0.0180296
A	19	Sample X19	3836	3681	3703	3675	3683	3664				-0.0568214	-0.0722427	-0.0700706	-0.0728341	-0.0720454	-0.0739173		A	19	-0.00564007	-0.0196479	-0.0146558	-0.010509	-0.0159271	-0.000685799	0		4	100	0.00583173	-0.00150929	0.0173475	-0.000261049	-0.00327792	-0.000749117	0.0195249	0.000569139	0.0191508	0.0145888	0.00872297	0.0154159	0.0660864	0.0369177	0.0387377		0.00273854	0.00017314	0.0168833
A	20	Sample X20	2858	2898	2860	2780	2793	2802				-0.149723	-0.14612	-0.149543	-0.156704	-0.155545	-0.154741		A	20	0.0259189	0.0330837	0.0259245	0.0227592	0.0220101	-0.000260581	0		6	50	0.00713695	0.00134467	0.0174432	0.000885432	-0.00274169	4.30304e-05	0.0158783	-0.00162159	0.0140174	0.0119652	0.00718433	0.0136709	0.0579263	0.0344856	0.0329015		-0.00193496	0.00087967	0.0147125
A	21	Sample X21	4319	4376	4277	4244	4260	4249				-0.00693432	-0.000856372	-0.0113864	-0.0148688	-0.0131821	-0.014342		A	21	0.044247	0.0517384	0.0440284	0.0474563	0.0429363	-8.73782e-05	0		8	25	0.00390627	-0.000863412	0.0173208	0.000373	-0.00150552	-0.000408319	0.0150948	-0.000902201	0.0161539	0.00958902	0.00614113	0.0110877	0.0431365	0.0257437	0.0287066		0.00113418	-0.000371898	0.014207
A	22	Sample X22	2768	2765	3004	2748	2731	2727				-0.157773	-0.15804	-0.136494	-0.159551	-0.161059	-0.161414		A	22	0.017869	0.0211636	0.0389741	0.0199124	0.0164956	-9.15618e-05	0		10	12.5	0.00286171	-2.81068e-05	0.0138994	-0.000317632	-0.00205751	-0.00143791	0.0101041	-0.000306802	0.0106385	0.00575404	0.00519038	0.00720736	0.0310491	0.0238105	0.0220988		0.00118983	-2.22323e-05	0.0119277
A	23	Sample X23	3892	3878	3850	3781	3843	3826				-0.0511813	-0.0525948	-0.0554148	-0.0623251	-0.0561184	-0.0578247		A	23	0	0	0	0	0	0	0		12	6.25	0.0014687	0.000195419	0.0091888	-0.000784215	-0.000102267	0.000382621	0.00490028	-5.03383e-05	0.00540579	0.00384538	0.00221872	0.0037707	0.0179949	0.0132776	0.0145963		0.000703434	-0.000218532	0.00988594
A	24	Sample X24	2565	2524	2567	2521	2543	2534				-0.175642	-0.179203	-0.175468	-0.179463	-0.177555	-0.178336		A	24	0	0	0	0	0	0	0		14	3.125	-0.00026748	0.000146373	0.00525952	-0.00260748	-0.00152857	0.000626925	0.00255868	-0.000348509	0.0021397	0.00126744	0.00119344	0.00158086	0.00694242	0.00750123	0.00737931		0.000367967	0.001946	0.00719848
B	1	Sample X25	4540	4723	4667	4709	4726	4765				0.0168651	0.03706	0.0308322	0.035499	0.0373948	0.0417589		B	1	0.130108	0.146065	0.140497	0.14846	0.152514	0.00149376	0		16	1.5625	-0.000225355	-0.000822548	0.00333614	-0.000621864	-0.00408976	-0.000242479	0.000717863	0.000322051	0.00159463	-0.000976959	0.000611346	0.00103748	0.00373045	0.00302201	0.00451645		-0.000574611	-0.00129764	0.00480159
B	2	Sample X26	4270	4339	4385	4813	4471	4472				-0.0121262	-0.00480643	0.000107104	0.0471588	0.00936641	0.00947464		B	2	0.0714787	0.0787985	0.0950205	0.134937	0.0986927	0.00181427	0		18	0.78125	-0.000685799	-0.00101539	-0.000763109	-0.000622687	-0.0017049	0.00155213	0.00212097	0.00033854	0.000294076	-0.00186587	-0.000445576	0.000724197	0.00164811	0.00138789	0.00264749		-0.000260581	0.000238819	0.00287291
B	3	Sample X27	4633	5540	4851	4616	5326	4805				0.0270718	0.133032	0.0514565	0.0251974	0.10693	0.0462566		B	3	0.140314	0.242037	0.161122	0.138158	0.222049	0.00544897	0		20	0.390625	-8.73782e-05	-0.000501151	-0.000123049	-0.00148209	-0.00209792	0.00153586	0.00186239	-0.00247028	-0.000895705	-0.000195538	6.22006e-05	0.000857647	0.000284531	0.00059362	0.00150862		-9.15618e-05	0.000334408	0.00193495
B	4	Sample X28	3900	3943	4370	3879	3912	3978				-0.0503726	-0.0460127	-0.00149811	-0.0524939	-0.0491581	-0.0424477		B	4	0.0332323	0.0375922	0.0934153	0.0352847	0.0401682	0.000462395	0		22	0	0	0	0	0	0	0	0	0	0	0	0	0	0	0	0		0	0	0
B	5	Sample X29	4858	4918	4764	4867	4639	4743				0.0522504	0.0590832	0.0416467	0.0532721	0.0277343	0.0392945		B	5	0.165493	0.168088	0.151312	0.166233	0.142854	-0.00150929	0
B	6	Sample X30	3611	3591	3593	3570	3579	3613				-0.0791173	-0.0810713	-0.0808761	-0.0831182	-0.0822416	-0.0789216		B	6	0.00448762	0.00253358	0.0140373	0.0046603	0.00708472	0.00017314	0
B	7	Sample X31	4789	5115	4643	4897	4950	5243				0.0444549	0.0818797	0.0281762	0.056686	0.0627483	0.0969961		B	7	0.157697	0.190884	0.137841	0.169647	0.177868	0.00134467	0
B	8	Sample X32	3391	3522	3425	3515	3469	3473				-0.100368	-0.0877785	-0.0971187	-0.088456	-0.0928947	-0.0925097		B	8	-0.0167635	-0.00417365	-0.00220538	-0.000677495	-0.00356842	0.00087967	0
B	9	Sample X33	4721	4534	4591	4681	4587	4594				0.0368368	0.0162106	0.0224481	0.0323852	0.0220089	0.0227775		B	9	0.150079	0.125215	0.132113	0.145346	0.137128	-0.000863412	0
B	10	Sample X34	3633	3648	3533	3977	3517	3765				-0.0769626	-0.0754904	-0.0867128	-0.0425498	-0.0882625	-0.0639196		B	10	0.00664226	0.00811445	0.00820056	0.0452288	0.00106379	-0.000371898	0
B	11	Sample X35	4574	4590	4566	4520	4553	4436				0.0205832	0.0223383	0.019707	0.0146851	0.0182849	0.00558652		B	11	0.133826	0.131343	0.129372	0.127646	0.133404	-2.81068e-05	0
B	12	Sample X36	3769	3803	3845	4424	3708	3774				-0.0635213	-0.0601278	-0.0559174	0.00429422	-0.0695762	-0.0630231		B	12	0.0200836	0.023477	0.038996	0.0920728	0.0197501	-2.22323e-05	0
B	13	Sample X37	4250	4306	4367	4191	4260	4229				-0.0142367	-0.00831472	-0.00181881	-0.0204333	-0.0131821	-0.0164472		B	13	0.0990059	0.10069	0.107846	0.0925274	0.101937	0.000195419	0
B	14	Sample X38	3847	4040	3798	3738	3757	3755				-0.0557164	-0.0360966	-0.0606277	-0.0666037	-0.0647158	-0.0649147		B	14	0.0278885	0.0475082	0.0342857	0.0211748	0.0246105	-0.000218532	0
B	15	Sample X39	4320	4221	4242	4270	4323	4219				-0.00682804	-0.0172879	-0.0150794	-0.0121262	-0.00650915	-0.0174979		B	15	0.106415	0.0917167	0.0945858	0.100835	0.10861	0.000146373	0
B	16	Sample X40	3636	3634	3733	3656	3872	3651				-0.0766684	-0.0768646	-0.0670998	-0.0747042	-0.0531998	-0.0751957		B	16	0.00693649	0.00674033	0.0278135	0.0130743	0.0361265	0.001946	0
B	17	Sample X41	4811	4858	4561	4569	4684	4894				0.0469332	0.0522504	0.0191598	0.0200355	0.0327183	0.056344		B	17	0.160176	0.161255	0.128825	0.132996	0.147838	-0.000822548	0
B	18	Sample X42	3789	3682	3586	3518	3533	3503				-0.0615268	-0.072144	-0.0815591	-0.0881657	-0.0867128	-0.0896162		B	18	0.0220781	0.0114608	0.0133542	-0.000387206	0.00261349	-0.00129764	0
B	19	Sample X43	4194	4249	4160	4097	4029	4027				-0.0201192	-0.014342	-0.0236718	-0.0302168	-0.0372268	-0.0374322		B	19	0.0931233	0.0946625	0.0859934	0.082744	0.0778925	-0.00101539	0
B	20	Sample X44	3570	3591	3557	3575	3548	3528				-0.0831182	-0.0810713	-0.0843829	-0.0826313	-0.0852574	-0.0871974		B	20	0.000486641	0.00253358	0.0105304	0.00514722	0.00406892	0.000238819	0
B	21	Sample X45	3753	3711	3765	3671	3658	3623				-0.0651136	-0.0692794	-0.0639196	-0.0732281	-0.0745076	-0.0779427		B	21	0.048129	0.0397252	0.0457456	0.0397326	0.0406117	-0.000501151	0
B	22	Sample X46	3871	3971	3921	3859	3864	3863				-0.0533006	-0.0431619	-0.0482461	-0.0545094	-0.0540059	-0.0541066		B	22	0.0303042	0.040443	0.0466673	0.0332692	0.0353204	0.000334408	0
B	23	Sample X47	3255	3300	3293	3258	3235	3220				-0.113243	-0.109005	-0.109665	-0.112961	-0.115119	-0.116524		B	23	0	0	0	0	0	0	0
B	24	Sample X48	3565	3565	3448	3522	3506	3498				-0.0836049	-0.0836049	-0.0949134	-0.0877785	-0.0893263	-0.0900991		B	24	0	0	0	0	0	0	0
C	1	Sample X49	7885	8223	8699	9043	9439	9946				0.474653	0.534192	0.623565	0.692565	0.777056	0.894027		C	1	0.539071	0.597514	0.689474	0.753492	0.848608	0.0206358	0
C	2	Sample X50	5909	6413	6788	7196	7508	7837				0.179773	0.247422	0.300858	0.362282	0.411751	0.466445		C	2	0.323089	0.415366	0.464042	0.53653	0.577318	0.0169486	0
C	3	Sample X51	6757	7164	8534	7756	9167	9092				0.296334	0.357334	0.591815	0.452728	0.718416	0.702716		C	3	0.360752	0.420656	0.657724	0.513656	0.789968	0.0286144	0
C	4	Sample X52	4823	5353	5836	6343	6758	7084				0.0482878	0.110184	0.170346	0.237749	0.29648	0.345063		C	4	0.191604	0.278128	0.33353	0.411997	0.462048	0.0180296	0
C	5	Sample X53	5386	5972	6221	6698	7228	7662				0.114176	0.187982	0.221109	0.287779	0.367253	0.437018		C	5	0.178594	0.251304	0.287018	0.348706	0.438805	0.0173475	0
C	6	Sample X54	4406	4927	5427	5859	6311	6684				0.00235927	0.0601126	0.11916	0.173307	0.233358	0.285759		C	6	0.145675	0.228057	0.282344	0.347554	0.398925	0.0168833	0
C	7	Sample X55	5378	5942	6039	7002	7231	8462				0.113207	0.184064	0.196788	0.332631	0.36772	0.578221		C	7	0.177624	0.247387	0.262696	0.393558	0.439272	0.0174432	0
C	8	Sample X56	4063	4496	4902	5428	5792	6253				-0.0337288	0.0120761	0.0572562	0.119282	0.164708	0.225447		C	8	0.109587	0.18002	0.22044	0.29353	0.330276	0.0147125	0
C	9	Sample X57	4599	4967	5496	6042	6616	7056				0.023327	0.0647013	0.127607	0.197184	0.276004	0.340802		C	9	0.0877443	0.128023	0.193515	0.258111	0.347556	0.0173208	0
C	10	Sample X58	3605	4125	4631	4975	5361	5718				-0.0797039	-0.0273139	0.0268511	0.0656217	0.11115	0.155298		C	10	0.0636122	0.14063	0.190035	0.239869	0.276718	0.014207	0
C	11	Sample X59	4559	4996	5376	5899	6215	6879				0.018941	0.0680424	0.112965	0.178476	0.220298	0.314252		C	11	0.0833583	0.131364	0.178873	0.239404	0.29185	0.0138994	0
C	12	Sample X60	3493	3937	4259	4664	4979	5264				-0.0905818	-0.0466224	-0.0132876	0.0304998	0.0660823	0.0994996		C	12	0.0527343	0.121322	0.149896	0.204747	0.23165	0.0119277	0
C	13	Sample X61	4476	4703	5023	5264	5601	5862				0.00990769	0.0348309	0.0711639	0.0994996	0.140605	0.173693		C	13	0.074325	0.0981529	0.137073	0.160427	0.212157	0.0091888	0
C	14	Sample X62	3408	3807	4078	4425	4635	4886				-0.0987451	-0.0597277	-0.0321811	0.00440184	0.0272926	0.0554327		C	14	0.044571	0.108216	0.131003	0.17865	0.19286	0.00988594	0
C	15	Sample X63	4333	4540	4749	4839	4981	5134				-0.00544533	0.0168651	0.039966	0.0500972	0.0663127	0.0841082		C	15	0.058972	0.0801872	0.105875	0.111025	0.137865	0.00525952	0
C	16	Sample X64	3382	3593	3822	4013	4238	4392				-0.101226	-0.0808761	-0.0582257	-0.0388681	-0.0155005	0.000857194		C	16	0.0420897	0.087068	0.104958	0.13538	0.150067	0.00719848	0
C	17	Sample X65	4389	4332	4462	4540	4780	4632				0.00053565	-0.00555177	0.00839291	0.0168651	0.0434429	0.0269614		C	17	0.064953	0.0577703	0.0743016	0.0777926	0.114995	0.00333614	0
C	18	Sample X66	3405	3675	3650	3777	3911	4024				-0.0990318	-0.0728341	-0.0752939	-0.062724	-0.0492593	-0.0377401		C	18	0.0442843	0.09511	0.0878899	0.111524	0.116308	0.00480159	0
C	19	Sample X67	4258	4119	4103	4056	4080	4125				-0.0133931	-0.0279367	-0.0295955	-0.0344501	-0.0319745	-0.0273139		C	19	0.0510242	0.0353853	0.0363131	0.0264774	0.0395776	-0.000763109	0
C	20	Sample X68	3017	3160	3146	3201	3242	3304				-0.135305	-0.12212	-0.12342	-0.1183	-0.114463	-0.108627		C	20	0.00801088	0.0458246	0.0397642	0.0559477	0.0511046	0.00287291	0
C	21	Sample X69	4215	4192	4124	4106	4129	4136				-0.0179179	-0.0203286	-0.0274177	-0.0292847	-0.0268984	-0.0261709		C	21	0.0464995	0.0429934	0.0384909	0.0316428	0.0446537	-0.000123049	0
C	22	Sample X70	3231	3101	2989	3099	3303	3316				-0.115494	-0.127585	-0.137863	-0.12777	-0.108721	-0.107493		C	22	0.027822	0.0403588	0.0253212	0.0464778	0.0568462	0.00193495	0
C	23	Sample X71	3760	3771	3745	3795	3688	3686				-0.0644173	-0.063322	-0.0659086	-0.0609275	-0.0715522	-0.0717495		C	23	0	0	0	0	0	0	0
C	24	Sample X72	2929	2653	2707	2581	2680	2510				-0.143316	-0.167944	-0.163184	-0.174248	-0.165567	-0.180416		C	24	0	0	0	0	0	0	0
D	1	Sample X73	5218	5182	5282	5323	5405	5526				0.0940245	0.0897618	0.101651	0.106569	0.116482	0.131302		D	1	0.177435	0.16927	0.179201	0.181961	0.193347	0.00106082	0
D	2	Sample X74	8267	9694	10608	11400	12275	13066				0.542174	0.834582	1.06386	1.29764	1.60499	1.94081		D	2	0.45123	0.762144	0.992344	1.22683	1.53395	0.0721811	0
D	3	Sample X75	4642	4763	4656	4713	4873	4799				0.0280657	0.0415346	0.0296139	0.0359447	0.0539538	0.0455805		D	3	0.111476	0.121043	0.107165	0.111337	0.130818	0.0012895	0
D	4	Sample X76	7111	8169	9075	9942	10750	11439				0.349189	0.52447	0.699185	0.893062	1.10313	1.31015		D	4	0.258245	0.452032	0.627673	0.822246	1.03208	0.0515889	0
D	5	Sample X77	4562	4678	4631	4571	4586	4664				0.0192692	0.0320522	0.0268511	0.0202546	0.0218992	0.0304998		D	5	0.102679	0.111561	0.104402	0.0956467	0.0987637	-0.000261049	0
D	6	Sample X78	6959	7967	8822	9647	10462	11147				0.326169	0.488815	0.64779	0.823786	1.02458	1.2189		D	6	0.235225	0.416376	0.576279	0.752969	0.953527	0.0478868	0
D	7	Sample X79	4116	4347	4081	4063	4305	4225				-0.028248	-0.00395384	-0.0318712	-0.0337288	-0.00842082	-0.0168676		D	7	0.0551623	0.0755546	0.0456795	0.0416634	0.0684437	0.000885432	0
D	8	Sample X80	6463	7175	8049	8869	9539	10296				0.254388	0.359033	0.503155	0.657177	0.799312	0.981211		D	8	0.163444	0.286594	0.431644	0.58636	0.728263	0.0376546	0
D	9	Sample X81	4133	4216	4117	4200	4249	4149				-0.0264827	-0.0178129	-0.0281443	-0.0194908	-0.014342	-0.0248181		D	9	0.0569275	0.0616955	0.0494065	0.0559014	0.0625225	0.000373	0
D	10	Sample X82	5387	6268	6775	7445	8091	8650				0.114297	0.227487	0.298959	0.401579	0.510571	0.614048		D	10	0.0233535	0.155048	0.227447	0.330763	0.439523	0.0277446	0
D	11	Sample X83	4192	3958	3885	4019	4209	3962				-0.0203286	-0.0444866	-0.0518883	-0.038253	-0.0185474	-0.0440792		D	11	0.0630817	0.0350218	0.0256625	0.0371392	0.0583172	-0.000317632	0
D	12	Sample X84	6125	6479	7243	7776	8225	8822				0.208206	0.256627	0.369591	0.456099	0.534554	0.64779		D	12	0.117262	0.184189	0.29808	0.385283	0.463506	0.0230829	0
D	13	Sample X85	4191	4055	4169	4148	4141	4133				-0.0204333	-0.0345531	-0.0227328	-0.0249222	-0.0256508	-0.0264827		D	13	0.062977	0.0449553	0.054818	0.05047	0.0512138	-0.000784215	0
D	14	Sample X86	5856	6447	6896	7401	7782	8184				0.17292	0.252154	0.316773	0.394531	0.457113	0.527163		D	14	0.0819761	0.179715	0.245261	0.323714	0.386065	0.0202726	0
D	15	Sample X87	4457	4193	4127	4193	4150	4130				0.00785254	-0.0202239	-0.0271062	-0.0202239	-0.0247139	-0.0267945		D	15	0.0912628	0.0592845	0.0504446	0.0551683	0.0521506	-0.00260748	0
D	16	Sample X88	5337	5588	5781	6166	6497	6820				0.108254	0.138986	0.163304	0.213696	0.259152	0.305548		D	16	0.0173102	0.0665473	0.0917921	0.14288	0.188104	0.0113863	0
D	17	Sample X89	4073	4115	4033	4092	4046	4031				-0.0326973	-0.0283517	-0.036816	-0.0307341	-0.0354796	-0.0370214		D	17	0.0507129	0.0511567	0.0407348	0.0446581	0.041385	-0.000621864	0
D	18	Sample X90	5344	6367	6313	6452	6539	6436				0.109098	0.241055	0.233632	0.252852	0.265069	0.250621		D	18	0.0181539	0.168617	0.16212	0.182035	0.19402	0.0117244	0
D	19	Sample X91	3800	3585	3726	3750	3772	3749				-0.0604278	-0.0816566	-0.0677939	-0.0654118	-0.0632224	-0.0655112		D	19	0.0229825	-0.00214822	0.00975685	0.00998037	0.0136421	-0.000622687	0
D	20	Sample X92	4487	4675	4766	4803	4906	5001				0.0110997	0.0317193	0.041871	0.0460312	0.0577126	0.0686196		D	20	-0.0798443	-0.0407194	-0.0296403	-0.0247853	-0.0133355	0.00443392	0
D	21	Sample X93	4203	4034	4015	4003	4052	3947				-0.0191765	-0.0367133	-0.0386631	-0.0398924	-0.0348621	-0.045606		D	21	0.0642338	0.0427951	0.0388877	0.0354998	0.0420025	-0.00148209	0
D	22	Sample X94	5732	5686	5744	5762	5828	5924				0.157072	0.151257	0.158594	0.160882	0.169319	0.181721		D	22	0.0661277	0.0788187	0.0870827	0.0900658	0.0982707	0.00214287	0
D	23	Sample X95	3567	3607	3627	3649	3634	3649				-0.0834103	-0.0795084	-0.0775508	-0.0753922	-0.0768646	-0.0753922		D	23	0	0	0	0	0	0	0
D	24	Sample X96	5192	5034	5026	5020	5022	5039				0.0909439	0.0724387	0.0715114	0.0708165	0.0710481	0.0730187		D	24	0	0	0	0	0	0	0
E	1	Sample X97	6661	6702	6718	6749	6714	6669				0.282449	0.288357	0.290671	0.29517	0.290092	0.283599		E	1	-0.0371486	-0.0495629	-0.0559183	-0.042295	-0.0594032	-0.00148364	0
E	2	Sample X98	5301	5510	5659	5769	5837	5908				0.103927	0.12933	0.147861	0.161774	0.170475	0.179643		E	2	0.0956419	0.163986	0.117583	0.145672	0.166181	0.00470259	0
E	3	Sample X99	6778	6585	6454	6315	6342	6381				0.299397	0.271588	0.253131	0.233906	0.237612	0.242989		E	3	-0.0202011	-0.0663321	-0.0934587	-0.103559	-0.111884	-0.00611217	0
E	4	Sample X100	5185	5192	5210	5319	5496	5599				0.0901163	0.0909439	0.0930756	0.106088	0.127607	0.140356		E	4	0.0818315	0.1256	0.0627973	0.0899864	0.123312	0.00276539	0
E	5	Sample X101	6213	6447	6206	6069	6069	6109				0.220027	0.252154	0.219082	0.200756	0.200756	0.206072		E	5	-0.0995705	-0.0857657	-0.127508	-0.136709	-0.148739	-0.00327792	0
E	6	Sample X102	4860	4808	4897	4904	4896	4997				0.0524773	0.0465948	0.056686	0.0574844	0.056572	0.0681578		E	6	0.0441925	0.081251	0.0264077	0.0413828	0.0522777	0.000539016	0
E	7	Sample X103	6086	6088	6077	6027	6001	6026				0.203012	0.203277	0.201817	0.195205	0.191784	0.195073		E	7	-0.116586	-0.134642	-0.144773	-0.142261	-0.157712	-0.00274169	0
E	8	Sample X104	5211	5219	4728	4927	4778	4795				0.0931941	0.0941432	0.0376181	0.0601126	0.0432182	0.0451301		E	8	0.0849093	0.128799	0.00733985	0.044011	0.038924	-0.00306569	0
E	9	Sample X105	6204	6188	6195	6206	6258	6257				0.218812	0.216655	0.217598	0.219082	0.226127	0.225991		E	9	-0.100786	-0.121265	-0.128992	-0.118383	-0.123369	-0.00150552	0
E	10	Sample X106	4473	4591	4530	4687	4590	4626				0.00958288	0.0224481	0.0157745	0.0330515	0.0223383	0.0262995		E	10	0.00129807	0.0571042	-0.0145038	0.01695	0.018044	0.0011164	0
E	11	Sample X107	6366	6460	6298	6329	6359	6340				0.240917	0.253969	0.231579	0.235826	0.239952	0.237337		E	11	-0.0786806	-0.0839507	-0.11501	-0.10164	-0.109543	-0.00205751	0
E	12	Sample X108	4394	4418	4424	4456	4458	4470				0.00107162	0.00364877	0.00429422	0.0077445	0.00796059	0.00925819		E	12	-0.00721319	0.0383049	-0.025984	-0.00835702	0.00366637	0.000725304	0
E	13	Sample X109	6140	6284	6276	6345	6349	6385				0.210211	0.229668	0.228577	0.238024	0.238575	0.243542		E	13	-0.109387	-0.108252	-0.118013	-0.0994409	-0.110921	-0.000102267	0
E	14	Sample X110	4437	4373	4349	4393	4357	4326				0.00569429	-0.0011773	-0.00374057	0.000964401	-0.00288697	-0.00619013		E	14	-0.00259052	0.0334788	-0.0340188	-0.0151371	-0.00718119	-0.000306045	0
E	15	Sample X111	6270	6259	6384	6355	6321	6300				0.227759	0.226263	0.243404	0.239401	0.234728	0.231853		E	15	-0.0918385	-0.111657	-0.103186	-0.0980644	-0.114767	-0.00152857	0
E	16	Sample X112	4123	4070	4085	4091	4035	4066				-0.0275216	-0.0330069	-0.0314579	-0.0308376	-0.0366105	-0.0334195		E	16	-0.0358064	0.00164923	-0.0617362	-0.0469391	-0.0409048	-0.000339893	0
E	17	Sample X113	6510	6427	6399	6305	6283	6256				0.26098	0.249368	0.24548	0.232537	0.229531	0.225855		E	17	-0.0586178	-0.0885518	-0.101109	-0.104929	-0.119964	-0.00408976	0
E	18	Sample X114	4751	4542	4387	4339	4364	4351				0.0401899	0.0170834	0.000321351	-0.00480643	-0.00213939	-0.00352725		E	18	0.0319051	0.0517395	-0.0299569	-0.020908	-0.00643361	-0.00255591	0
E	19	Sample X115	5739	5719	5626	5563	5773	5707				0.157959	0.155425	0.143726	0.13588	0.162283	0.153907		E	19	-0.161638	-0.182495	-0.202864	-0.201585	-0.187212	-0.0017049	0
E	20	Sample X116	3905	3892	3866	3866	3892	3878				-0.0498667	-0.0511813	-0.0538045	-0.0538045	-0.0511813	-0.0525948		E	20	-0.0581515	-0.0165252	-0.0840827	-0.069906	-0.0554755	0.000178401	0
E	21	Sample X117	7296	7289	7341	7354	7286	7249				0.377893	0.376793	0.384992	0.387052	0.376322	0.370528		E	21	0.0582953	0.0388734	0.0384028	0.0495867	0.0268266	-0.00209792	0
E	22	Sample X118	4407	5292	4844	4890	4642	4725				0.00246665	0.102848	0.0506633	0.0558882	0.0280657	0.0372832		E	22	-0.00581816	0.137504	0.0203851	0.0397867	0.0237715	0.00197264	0
E	23	Sample X119	6915	7037	7094	7034	7113	7019				0.319598	0.33792	0.34659	0.337465	0.349495	0.335196		E	23	0	0	0	0	0	0	0
E	24	Sample X120	4461	4054	4662	4533	4424	4320				0.00828481	-0.0346561	0.0302782	0.0161015	0.00429422	-0.00682804		E	24	0	0	0	0	0	0	0
F	1	Sample X121	5074	4984	5008	5037	5019	4971				0.0770889	0.0666584	0.0694284	0.0727866	0.0707008	0.0651614		F	1	0.0946919	0.0742301	0.0742348	0.0877607	0.0975992	0.000193823	0
F	2	Sample X122	5487	5549	5593	5629	5614	5569				0.126501	0.134146	0.139608	0.144101	0.142226	0.136625		F	2	0.177177	0.191569	0.197834	0.203528	0.204153	0.0017984	0
F	3	Sample X123	5032	5194	5136	5067	5053	5087				0.0722068	0.0911806	0.0843431	0.0762735	0.0746446	0.0786053		F	3	0.0898097	0.0987522	0.0891495	0.0912476	0.101543	0.000782225	0
F	4	Sample X124	5501	5545	5282	5267	5302	5324				0.128222	0.133651	0.101651	0.0998578	0.104047	0.106689		F	4	0.178897	0.191074	0.159876	0.159285	0.165973	-0.000861656	0
F	5	Sample X125	4640	4579	4474	4438	4452	4526				0.0278447	0.0211313	0.00969114	0.00580208	0.00731249	0.0153386		F	5	0.0454477	0.028703	0.0144976	0.0207762	0.0342109	-0.000749117	0
F	6	Sample X126	4901	5068	4946	5002	5006	5052				0.0571421	0.0763899	0.0622894	0.0687351	0.0691973	0.0745284		F	6	0.107818	0.133813	0.120515	0.128163	0.131123	0.00155368	0
F	7	Sample X127	4711	4791	4572	4672	4633	4630				0.0357218	0.0446799	0.0203641	0.0313865	0.0270718	0.0267408		F	7	0.0533248	0.0522516	0.0251705	0.0463607	0.0539702	4.30304e-05	0
F	8	Sample X128	5146	5066	5027	4998	5049	5113				0.0855184	0.076157	0.0716272	0.0682732	0.0741798	0.0816454		F	8	0.136194	0.133581	0.129853	0.127701	0.136106	-5.89976e-06	0
F	9	Sample X129	4686	4570	4494	4584	4546	4525				0.0329404	0.020145	0.011859	0.0216797	0.0175201	0.0152296		F	9	0.0505433	0.0277167	0.0166655	0.0366538	0.0444186	-0.000408319	0
F	10	Sample X130	4514	4481	4444	4397	4445	4464				0.0140322	0.0104493	0.00644909	0.00139336	0.00655697	0.00860915		F	10	0.0647081	0.0678728	0.0646748	0.0608209	0.068483	0.00025166	0
F	11	Sample X131	4965	4997	4756	4711	4692	4693				0.0644713	0.0681578	0.0407499	0.0357218	0.0336072	0.0337184		F	11	0.0820742	0.0757295	0.0455563	0.050696	0.0605056	-0.00143791	0
F	12	Sample X132	4727	4728	4612	4656	4680	4694				0.0375064	0.0376181	0.024757	0.0296139	0.0322741	0.0338296		F	12	0.0881824	0.0950416	0.0829826	0.0890414	0.0942002	0.000401188	0
F	13	Sample X133	4452	4490	4452	4414	4419	4435				0.00731249	0.011425	0.00731249	0.00321873	0.00375631	0.00547876		F	13	0.0249154	0.0189967	0.0121189	0.0181928	0.0306547	0.000382621	0
F	14	Sample X134	4508	4509	4499	4452	4440	4412				0.0133797	0.0134884	0.0124018	0.00731249	0.0060177	0.00300379		F	14	0.0640556	0.0709119	0.0706275	0.06674	0.0679437	0.000259208	0
F	15	Sample X135	4482	4439	4357	4477	4483	4455				0.0105577	0.00590988	-0.00288697	0.010016	0.010666	0.00763648		F	15	0.0281606	0.0134816	0.00191946	0.0249901	0.0375645	0.000626925	0
F	16	Sample X136	4368	4258	4251	4280	4260	4274				-0.00171192	-0.0133931	-0.0141312	-0.0110691	-0.0131821	-0.0117035		F	16	0.048964	0.0440304	0.0440944	0.0483584	0.048744	-1.4669e-05	0
F	17	Sample X137	4565	4603	4455	4430	4446	4445				0.0195975	0.0237667	0.00763648	0.00494014	0.00666486	0.00655697		F	17	0.0372005	0.0313384	0.0124429	0.0199143	0.0335633	-0.000242479	0
F	18	Sample X138	4320	4291	4227	4509	4227	4240				-0.00682804	-0.00990483	-0.0166575	0.0134884	-0.0166575	-0.01529		F	18	0.0438479	0.0475187	0.0415682	0.0729159	0.0452686	9.47129e-05	0
F	19	Sample X139	4101	4248	4298	4163	4235	4213				-0.0298027	-0.0144474	-0.00916313	-0.0233589	-0.0158162	-0.0181277		F	19	-0.0121997	-0.00687573	-0.00435671	-0.00838477	0.0110822	0.00155213	0
F	20	Sample X140	4411	4348	4202	4173	4162	4194				0.00289633	-0.00384721	-0.0192813	-0.0223151	-0.0234632	-0.0201192		F	20	0.0535723	0.0535763	0.0389444	0.0371124	0.0384628	-0.0010073	0
F	21	Sample X141	4275	4548	4658	4331	4404	4361				-0.0115978	0.0177386	0.0298353	-0.00565819	0.00214453	-0.00245986		F	21	0.0060051	0.0253103	0.0346417	0.00931593	0.0290429	0.00153586	0
F	22	Sample X142	4264	4124	4125	4201	4242	4151				-0.0127599	-0.0274177	-0.0273139	-0.0193861	-0.0150794	-0.0246098		F	22	0.0379161	0.0300058	0.0309118	0.0400415	0.0468466	0.00059537	0
F	23	Sample X143	4218	4313	4339	4243	4129	4128				-0.0176029	-0.00757169	-0.00480643	-0.0149741	-0.0268984	-0.0270023		F	23	0	0	0	0	0	0	0
F	24	Sample X144	3897	3830	3822	3810	3785	3796				-0.0506759	-0.0574235	-0.0582257	-0.0594275	-0.061926	-0.0608276		F	24	0	0	0	0	0	0	0
G	1	Sample X145	9072	9958	10020	10430	10860	11363				0.698562	0.896925	0.911999	1.01611	1.1343	1.28587		G	1	0.726292	0.927866	0.941802	1.05323	1.17071	0.0296276	0
G	2	Sample X146	11086	13071	14027	15196	16052	16677				1.20051	1.94314	2.45056	3.29623	4.16631	5.01669		G	2	1.22896	1.97904	2.4883	3.33796	4.2062	0.198482	0
G	3	Sample X147	7515	8451	8385	8784	9125	9505				0.412887	0.576158	0.563855	0.640254	0.7096	0.791701		G	3	0.440616	0.607099	0.593657	0.677378	0.746005	0.0203592	0
G	4	Sample X148	8653	10354	11547	12528	13528	13641				0.614629	0.996209	1.34532	1.70562	2.16962	2.22993		G	4	0.643084	1.0321	1.38306	1.74736	2.20951	0.104428	0
G	5	Sample X149	6856	7219	7603	8034	8551	8983				0.31085	0.365853	0.427269	0.500519	0.595048	0.680247		G	5	0.338579	0.396794	0.457072	0.537643	0.631453	0.0195249	0
G	6	Sample X150	6784	7744	8697	9415	10160	10827				0.300273	0.45071	0.623175	0.771772	0.946668	1.12488		G	6	0.328729	0.486601	0.660915	0.813505	0.98656	0.0438554	0
G	7	Sample X151	6259	6509	6834	7348	7774	8248				0.226263	0.260839	0.307607	0.386101	0.455762	0.538721		G	7	0.253992	0.29178	0.33741	0.423225	0.492167	0.0158783	0
G	8	Sample X152	5851	6296	6735	7187	7646	8122				0.172276	0.231306	0.293136	0.360888	0.434366	0.516075		G	8	0.200731	0.267197	0.330876	0.402621	0.474258	0.0182351	0
G	9	Sample X153	5682	6159	6450	6885	7236	7574				0.150753	0.212757	0.252572	0.315141	0.368499	0.422509		G	9	0.178483	0.243698	0.282375	0.352265	0.404904	0.0150948	0
G	10	Sample X154	5371	5822	6103	6305	6392	6657				0.112359	0.168549	0.205273	0.232537	0.244511	0.281875		G	10	0.140815	0.20444	0.243013	0.27427	0.284403	0.00957254	0
G	11	Sample X155	5409	5736	6053	6374	6502	6659				0.116969	0.157579	0.198637	0.242022	0.259855	0.282162		G	11	0.144698	0.18852	0.22844	0.279146	0.29626	0.0101041	0
G	12	Sample X156	4877	5157	5256	5285	5366	5494				0.0544086	0.0868129	0.0985451	0.10201	0.111755	0.127361		G	12	0.0828641	0.122704	0.136285	0.143743	0.151647	0.00458552	0
G	13	Sample X157	5341	5476	5500	5701	5861	6049				0.108736	0.125151	0.128099	0.15315	0.173565	0.198109		G	13	0.136465	0.156092	0.157901	0.190274	0.20997	0.00490028	0
G	14	Sample X158	4964	5079	5028	5052	5095	5185				0.0643563	0.0776719	0.0717431	0.0745284	0.0795397	0.0901163		G	14	0.0928118	0.113563	0.109483	0.116261	0.119432	0.00177468	0
G	15	Sample X159	5134	5259	5353	5348	5383	5495				0.0841082	0.0989029	0.110184	0.10958	0.113813	0.127484		G	15	0.111837	0.129844	0.139986	0.146704	0.150218	0.00255868	0
G	16	Sample X160	4669	4651	4605	4609	4656	4653				0.0310539	0.0290607	0.0239867	0.0244268	0.0296139	0.0292819		G	16	0.0595094	0.0649517	0.0617267	0.0661598	0.0695063	0.000666461	0
G	17	Sample X161	5043	4875	5001	5043	5061	5123				0.0734829	0.0541812	0.0686196	0.0734829	0.075575	0.0828174		G	17	0.101212	0.0851222	0.0984223	0.110607	0.11198	0.000717863	0
G	18	Sample X162	4692	4652	4722	4698	4683	4693				0.0336072	0.0291713	0.0369484	0.0342744	0.0326072	0.0337184		G	18	0.0620626	0.0650623	0.0746884	0.0760074	0.0724996	0.000695796	0
G	19	Sample X163	4673	4791	4743	4836	4879	4969				0.0314974	0.0446799	0.0392945	0.0497576	0.0546361	0.0649313		G	19	0.0592266	0.0756209	0.0690972	0.0868818	0.0910411	0.00212097	0
G	20	Sample X164	4342	4274	4236	4192	4212	4209				-0.0044868	-0.0117035	-0.015711	-0.0203286	-0.0182327	-0.0185474		G	20	0.0239686	0.0241875	0.0220291	0.0214044	0.0216597	-0.000153931	0
G	21	Sample X165	4333	4380	4430	4590	4512	4637				-0.00544533	-0.000428289	0.00494014	0.0223383	0.0138146	0.0275134		G	21	0.0222839	0.0305127	0.0347428	0.0594624	0.0502196	0.00186239	0
G	22	Sample X166	4635	5016	4580	4574	4554	4863				0.0272926	0.0703536	0.021241	0.0205832	0.0183943	0.0528178		G	22	0.055748	0.106245	0.058981	0.0623162	0.0582866	0.000169239	0
G	23	Sample X167	4121	4090	4101	4030	4037	4056				-0.0277292	-0.030941	-0.0298027	-0.0371241	-0.036405	-0.0344501		G	23	0	0	0	0	0	0	0
G	24	Sample X168	4114	4042	4024	3985	4003	4006				-0.0284555	-0.035891	-0.0377401	-0.041733	-0.0398924	-0.0395852		G	24	0	0	0	0	0	0	0
H	1	Sample X169	6735	6756	6593	6647	6678	6741				0.293136	0.296189	0.272725	0.28044	0.284895	0.294007		H	1	0.36725	0.369515	0.346446	0.356519	0.366649	-4.00892e-05	0
H	2	Sample X170	10050	12086	13601	14727	15666	16303				0.919354	1.53353	2.20837	2.9194	3.73972	4.48092		H	2	0.982177	1.60449	2.28071	2.99528	3.81245	0.188685	0
H	3	Sample X171	5689	5757	5806	5825	5775	5913				0.151636	0.160246	0.166499	0.168934	0.162538	0.180292		H	3	0.22575	0.233573	0.240219	0.245013	0.244292	0.00123619	0
H	4	Sample X172	9761	11329	12866	13511	14208	15034				0.850128	1.27513	1.84977	2.1607	2.5626	3.15942		H	4	0.912952	1.34609	1.92211	2.23659	2.63533	0.114825	0
H	5	Sample X173	4758	4806	4805	4781	4766	4781				0.040974	0.0463693	0.0462566	0.0435553	0.041871	0.0435553		H	5	0.115088	0.119696	0.119977	0.119635	0.123625	0.000569139	0
H	6	Sample X174	6625	7921	8995	9919	10730	11398				0.27729	0.480849	0.6827	0.887529	1.09753	1.29701		H	6	0.340114	0.551809	0.755042	0.963412	1.17027	0.0553435	0
H	7	Sample X175	4934	4572	4643	4602	4650	4672				0.0609139	0.0203641	0.0281762	0.0236568	0.0289501	0.0313865		H	7	0.135028	0.0936907	0.101897	0.0997364	0.110704	-0.00162159	0
H	8	Sample X176	6060	6464	7061	7781	8279	8930				0.199564	0.254528	0.341561	0.456944	0.544361	0.669467		H	8	0.262387	0.325488	0.413903	0.532827	0.617096	0.0236473	0
H	9	Sample X177	4470	4173	4278	4280	4272	4252				0.00925819	-0.0223151	-0.0112806	-0.0110691	-0.0119149	-0.0140258		H	9	0.0833723	0.0510115	0.0624398	0.0650105	0.0698393	-0.000902201	0
H	10	Sample X178	5253	5561	5693	5974	6407	6718				0.0981874	0.135632	0.15214	0.188244	0.246589	0.290671		H	10	0.161011	0.206592	0.224481	0.264127	0.319325	0.0105543	0
H	11	Sample X179	4391	4205	4314	4293	4276	4256				0.00075	-0.0189668	-0.0074655	-0.00969298	-0.0114921	-0.013604		H	11	0.0748641	0.0543598	0.066255	0.0663866	0.0702621	-0.000306802	0
H	12	Sample X180	4770	4828	5150	5328	5500	5647				0.0423199	0.0488529	0.0859889	0.10717	0.128099	0.146355		H	12	0.105144	0.119813	0.15833	0.183054	0.200834	0.00637936	0
H	13	Sample X181	4149	4162	4090	4058	4068	4067				-0.0248181	-0.0234632	-0.030941	-0.0342441	-0.0332132	-0.0333164		H	13	0.049296	0.0498634	0.0427795	0.0418355	0.048541	-5.03383e-05	0
H	14	Sample X182	4649	4757	4788	4850	4910	5035				0.0288395	0.040862	0.0443424	0.0513431	0.0581693	0.0725546		H	14	0.0916632	0.111822	0.116684	0.127226	0.130905	0.00261611	0
H	15	Sample X183	4317	4229	4209	4170	4195	4162				-0.00714683	-0.0164472	-0.0185474	-0.0226284	-0.0200145	-0.0234632		H	15	0.0669673	0.0568794	0.0551731	0.0534512	0.0617396	-0.000348509	0
H	16	Sample X184	4780	4553	4614	4720	4645	4696				0.0434429	0.0182849	0.0249772	0.0367252	0.0283972	0.034052		H	16	0.106267	0.0892448	0.0973184	0.112609	0.101133	-0.00034226	0
H	17	Sample X185	4155	4118	4149	4136	4128	4132				-0.024193	-0.0280405	-0.0248181	-0.0261709	-0.0270023	-0.0265867		H	17	0.0499211	0.0452861	0.0489024	0.0499088	0.0547519	0.000322051	0
H	18	Sample X186	4539	4533	4534	4528	4578	4600				0.016756	0.0161015	0.0162106	0.0155565	0.0210217	0.0234369		H	18	0.0795797	0.0870614	0.0885518	0.0914398	0.0937572	0.000945165	0
H	19	Sample X187	4025	4003	4037	3989	4000	3998				-0.0376374	-0.0398924	-0.036405	-0.0413243	-0.0401994	-0.040404		H	19	0.0364767	0.0334343	0.0373154	0.0347553	0.0415548	0.00033854	0
H	20	Sample X188	4347	4375	4239	4192	4209	4222				-0.00395384	-0.000963361	-0.0153953	-0.0203286	-0.0185474	-0.0171828		H	20	0.0588699	0.0699965	0.056946	0.0555547	0.0541882	-0.000312115	0
H	21	Sample X189	4404	4127	4018	3991	3977	3993				0.00214453	-0.0271062	-0.0383555	-0.0411199	-0.0425498	-0.0409154		H	21	0.0762586	0.0462204	0.0353649	0.0349597	0.0392044	-0.00247028	0
H	22	Sample X190	4436	4635	4410	4313	4376	4322				0.00558652	0.0272926	0.00278889	-0.00757169	-0.000856372	-0.00661546		H	22	0.0684103	0.0982524	0.0751302	0.0683116	0.0718792	0.000231261	0
H	23	Sample X191	3662	3670	3666	3642	3584	3582				-0.0741141	-0.0733266	-0.0737204	-0.0760796	-0.0817542	-0.0819492		H	23	0	0	0	0	0	0	0
H	24	Sample X192	3776	3694	3680	3644	3676	3682				-0.0628237	-0.0709598	-0.0723413	-0.0758833	-0.0727355	-0.072144		H	24	0	0	0	0	0	0	0
I	1	Sample X193	4512	5755	6713	7484	8073	8604				0.0138146	0.159992	0.289947	0.407865	0.507387	0.605182		I	1	0.236119	0.380489	0.510855	0.632792	0.72706	0.0327294	0
I	2	Sample X194	9572	12298	13974	15194	16170	16801				0.806741	1.6139	2.41884	3.29449	4.31018	5.21514		I	2	0.865367	1.67393	2.48386	3.35282	4.3561	0.232715	0
I	3	Sample X195	3653	4673	5386	6022	6507	6924				-0.0749991	0.0314974	0.114176	0.194546	0.260558	0.320939		I	3	0.147305	0.251994	0.335084	0.419473	0.480231	0.0221951	0
I	4	Sample X196	7475	9825	11592	12987	14756	15558				0.406411	0.865151	1.36022	1.90431	2.94107	3.63109		I	4	0.465037	0.925179	1.42523	1.96264	2.98698	0.168129	0
I	5	Sample X197	3427	4246	4910	5473	6010	6384				-0.0969272	-0.0146581	0.0581693	0.124783	0.192967	0.243404		I	5	0.125377	0.205839	0.279077	0.34971	0.41264	0.0191508	0
I	6	Sample X198	6782	8328	9663	10818	11764	12543				0.299981	0.553332	0.827451	1.12232	1.41847	1.71178		I	6	0.358608	0.61336	0.892465	1.18064	1.46438	0.073718	0
I	7	Sample X199	2705	3539	3966	4441	4834	5178				-0.163361	-0.0861309	-0.0436716	0.00612553	0.0495314	0.0892894		I	7	0.0589439	0.134366	0.177236	0.231052	0.269205	0.0140174	0
I	8	Sample X200	5586	6697	7899	8738	9500	10106				0.138737	0.287634	0.477059	0.631194	0.790586	0.93319		I	8	0.197364	0.347662	0.542073	0.68952	0.836497	0.0426089	0
I	9	Sample X201	3110	4036	4581	4988	5419	5813				-0.126754	-0.0365078	0.0213506	0.0671195	0.118185	0.167395		I	9	0.0955508	0.183989	0.242259	0.292046	0.337859	0.0161539	0
I	10	Sample X202	5024	5759	5917	6688	7089	7566				0.0712797	0.160501	0.180812	0.286336	0.345826	0.421199		I	10	0.129906	0.220528	0.245826	0.344662	0.391737	0.0174554	0
I	11	Sample X203	3049	3615	3994	4367	4658	4926				-0.132373	-0.0787259	-0.0408132	-0.00181881	0.0298353	0.0599981		I	11	0.0899318	0.141771	0.180095	0.223108	0.249509	0.0106385	0
I	12	Sample X204	4562	5157	4978	5380	5689	6019				0.0192692	0.0868129	0.0659671	0.113449	0.151636	0.194151		I	12	0.0778957	0.146841	0.130981	0.171775	0.197547	0.00797673	0
I	13	Sample X205	2985	3188	3350	3633	3859	4021				-0.138227	-0.119513	-0.10427	-0.0769626	-0.0545094	-0.0380479		I	13	0.0840773	0.100984	0.116638	0.147964	0.165164	0.00540579	0
I	14	Sample X206	4493	4592	4708	4918	5044	5205				0.0117505	0.0225579	0.0353876	0.0590832	0.0735991	0.092483		I	14	0.070377	0.0825857	0.100402	0.117409	0.11951	0.00327554	0
I	15	Sample X207	2817	2880	3040	3085	3197	3331				-0.1534	-0.147743	-0.133199	-0.129061	-0.118673	-0.106073		I	15	0.0689046	0.0727536	0.0877093	0.0958656	0.101	0.0021397	0
I	16	Sample X208	4362	4414	4464	4490	4544	4640				-0.00235305	0.00321873	0.00860915	0.011425	0.0173018	0.0278447		I	16	0.0562734	0.0632466	0.0736233	0.0697509	0.0632128	0.000462624	0
I	17	Sample X209	2628	2790	2823	2842	2926	2967				-0.170138	-0.155812	-0.152863	-0.15116	-0.143588	-0.139866		I	17	0.0521662	0.0646843	0.068045	0.073767	0.0760857	0.00159463	0
I	18	Sample X210	4484	4450	4443	4452	4451	4505				0.0107744	0.00709656	0.00634122	0.00731249	0.00720452	0.0130536		I	18	0.0694009	0.0671244	0.0713554	0.0656384	0.0531155	-0.00108569	0
I	19	Sample X211	2284	2293	2360	2369	2367	2365				-0.199739	-0.198978	-0.193293	-0.192526	-0.192697	-0.192867		I	19	0.0225657	0.0215184	0.0276149	0.0324006	0.0269768	0.000294076	0
I	20	Sample X212	4269	4319	4343	4357	4346	4372				-0.0122319	-0.00693432	-0.00438024	-0.00288697	-0.00406046	-0.00128425		I	20	0.0463946	0.0530935	0.0606339	0.0554389	0.0418506	-0.000302936	0
I	21	Sample X213	2709	2645	2598	2573	2586	2637				-0.163007	-0.168647	-0.172764	-0.174945	-0.173812	-0.169349		I	21	0.0592976	0.0518498	0.0481442	0.0499818	0.045862	-0.000895705	0
I	22	Sample X214	4401	4796	4282	4484	4254	4256				0.00182252	0.0452427	-0.0108575	0.0107744	-0.013815	-0.013604		I	22	0.060449	0.105271	0.0541566	0.0691003	0.0320961	-0.0018902	0
I	23	Sample X215	2013	2035	2030	1981	2045	2051				-0.222305	-0.220497	-0.220908	-0.224927	-0.219674	-0.219179		I	23	0	0	0	0	0	0	0
I	24	Sample X216	3818	3804	3754	3821	3944	3771				-0.0586265	-0.0600278	-0.0650142	-0.0583259	-0.045911	-0.063322		I	24	0	0	0	0	0	0	0
J	1	Sample X217	5477	5989	6536	7069	7733	8299				0.125273	0.190209	0.264645	0.342778	0.448864	0.548014		J	1	0.178473	0.242299	0.308113	0.382978	0.485371	0.0204599	0
J	2	Sample X218	5639	6098	6672	7252	7661	8087				0.145353	0.204607	0.284031	0.370996	0.436852	0.509862		J	2	0.139551	0.206319	0.279737	0.380583	0.449295	0.0206496	0
J	3	Sample X219	5767	6156	6682	7277	7659	7919				0.161519	0.212354	0.285471	0.37491	0.43652	0.480504		J	3	0.214719	0.264445	0.328939	0.415109	0.473028	0.0172206	0
J	4	Sample X220	4849	5097	5262	5722	6463	6630				0.0512298	0.0797734	0.0992609	0.155805	0.254388	0.278005		J	4	0.0454277	0.0814853	0.0949667	0.165392	0.266831	0.0147602	0
J	5	Sample X221	4942	5278	5737	6305	6764	6991				0.0618307	0.101172	0.157706	0.232537	0.297354	0.330974		J	5	0.11503	0.153262	0.201173	0.272736	0.333862	0.0145888	0
J	6	Sample X222	4773	4875	5035	5112	5294	5434				0.0426567	0.0541812	0.0725546	0.0815283	0.103088	0.120013		J	6	0.0368546	0.0558931	0.0682604	0.0911154	0.115531	0.00524507	0
J	7	Sample X223	5172	5692	5838	6299	6677	6997				0.0885811	0.152014	0.170603	0.231716	0.284751	0.331877		J	7	0.141781	0.204104	0.214071	0.271915	0.321258	0.0119652	0
J	8	Sample X224	4539	4730	4732	4731	4808	4899				0.016756	0.0378414	0.0380648	0.0379531	0.0465948	0.056914		J	8	0.0109539	0.0395534	0.0337706	0.0475402	0.0590379	0.0032056	0
J	9	Sample X225	4950	5234	5495	5838	6237	6504				0.0627483	0.0959253	0.127484	0.170603	0.223276	0.260136		J	9	0.115948	0.148015	0.170951	0.210803	0.259783	0.00958902	0
J	10	Sample X226	4841	4932	4686	4771	4761	4836				0.0503236	0.0606849	0.0329404	0.0424321	0.0413103	0.0497576		J	10	0.0445215	0.0623968	0.0286462	0.0520192	0.0537534	0.000615462	0
J	11	Sample X227	4971	5140	5411	5636	5819	6171				0.0651614	0.084813	0.117212	0.144977	0.168164	0.214368		J	11	0.118361	0.136903	0.16068	0.185176	0.204672	0.00575404	0
J	12	Sample X228	4605	4568	4512	4642	4569	4592				0.0239867	0.019926	0.0138146	0.0280657	0.0200355	0.0225579		J	12	0.0181846	0.0216379	0.0095204	0.0376527	0.0324786	0.000952933	0
J	13	Sample X229	4572	4711	4911	5076	5224	5415				0.0203641	0.0357218	0.0582835	0.0773221	0.0947368	0.117699		J	13	0.0735639	0.0878121	0.101751	0.117521	0.131245	0.00384538	0
J	14	Sample X230	4563	4515	4498	4486	4574	4553				0.0193786	0.014141	0.0122932	0.0109912	0.0205832	0.0182849		J	14	0.0135766	0.0158529	0.00799902	0.0205783	0.0330263	0.00129665	0
J	15	Sample X231	4509	4609	4591	4684	4831	4936				0.0134884	0.0244268	0.0224481	0.0327183	0.049192	0.061143		J	15	0.0666882	0.076517	0.0659158	0.0729177	0.0856998	0.00126744	0
J	16	Sample X232	4495	4463	4491	4476	4448	4456				0.0119676	0.00850102	0.0115335	0.00990769	0.00688068	0.0077445		J	16	0.00616548	0.0102129	0.00723929	0.0194947	0.0193238	0.00087722	0
J	17	Sample X233	4386	4271	4269	4336	4405	4433				0.000214221	-0.0120206	-0.0122319	-0.00512593	0.00225189	0.00526327		J	17	0.0534141	0.0400697	0.0312359	0.0350735	0.0387597	-0.000976959	0
J	18	Sample X234	4666	5112	4960	4796	4911	4724				0.0307214	0.0815283	0.0638966	0.0452427	0.0582835	0.0371716		J	18	0.0249193	0.0832402	0.0596024	0.0548297	0.0707266	0.00305382	0
J	19	Sample X235	4632	4572	4479	4516	4529	4536				0.0269614	0.0203641	0.0102326	0.0142498	0.0156655	0.0164287		J	19	0.0801613	0.0724543	0.0537004	0.0544492	0.0521733	-0.00186587	0
J	20	Sample X236	4570	4514	4473	4358	4365	4353				0.020145	0.0140322	0.00958288	-0.00278021	-0.00203254	-0.00331387		J	20	0.0143429	0.0157441	0.00528866	0.00680683	0.0104106	-0.000262158	0
J	21	Sample X237	3962	4051	4082	4053	4096	4074				-0.0440792	-0.034965	-0.0317679	-0.0347591	-0.0303203	-0.0325941		J	21	0.0091206	0.0171252	0.0116998	0.00544031	0.00618753	-0.000195538	0
J	22	Sample X238	5224	5080	5058	4725	4734	5050				0.0947368	0.0777885	0.075226	0.0372832	0.0382883	0.074296		J	22	0.0889348	0.0795004	0.0709318	0.0468702	0.0507314	-0.00254689	0
J	23	Sample X239	3872	3883	3968	4000	4036	4252				-0.0531998	-0.0520902	-0.0434678	-0.0401994	-0.0365078	-0.0140258		J	23	0	0	0	0	0	0	0
J	24	Sample X240	4438	4368	4424	4294	4267	4375				0.00580208	-0.00171192	0.00429422	-0.00958704	-0.0124431	-0.000963361		J	24	0	0	0	0	0	0	0
K	1	Sample X241	5276	5062	5135	5190	6153	6219				0.100933	0.0756914	0.0842256	0.0907074	0.211952	0.220838		K	1	0.129285	0.106839	0.114339	0.118955	0.241237	0.00746348	0
K	2	Sample X242	5981	6579	7158	7609	8098	8530				0.18916	0.270735	0.356409	0.428257	0.511811	0.591056		K	2	0.246283	0.301572	0.394867	0.494463	0.578415	0.0221421	0
K	3	Sample X243	4943	5196	5461	5634	5871	6115				0.0619453	0.0914172	0.123313	0.144727	0.174855	0.206872		K	3	0.090297	0.122565	0.153426	0.172975	0.204139	0.0075895	0
K	4	Sample X244	5070	5368	6021	6252	6910	7188				0.0766229	0.111996	0.194414	0.225311	0.318854	0.361043		K	4	0.133745	0.142834	0.232872	0.291518	0.385457	0.0167808	0
K	5	Sample X245	4971	5282	5538	5770	6026	6222				0.0651614	0.101651	0.132785	0.161901	0.195073	0.221244		K	5	0.0935131	0.132798	0.162898	0.190149	0.224358	0.00872297	0
K	6	Sample X246	5020	5253	5418	5533	5726	5909				0.0708165	0.0981874	0.118064	0.132167	0.156311	0.179773		K	6	0.127939	0.129025	0.156522	0.198373	0.222915	0.00633173	0
K	7	Sample X247	4988	5184	5370	5666	5864	6046				0.0671195	0.0899981	0.112238	0.14874	0.173951	0.197712		K	7	0.0954712	0.121146	0.142352	0.176988	0.203236	0.00718433	0
K	8	Sample X248	4887	4858	4934	5126	5826	5457				0.0555466	0.0522504	0.0609139	0.0831692	0.169062	0.122823		K	8	0.112669	0.0830879	0.099372	0.149376	0.235666	0.00819978	0
K	9	Sample X249	4768	4963	5125	5374	5542	5711				0.0420954	0.0642414	0.0830519	0.112722	0.133279	0.154413		K	9	0.0704472	0.0953892	0.113165	0.14097	0.162564	0.00614113	0
K	10	Sample X250	5373	4953	4868	4911	5000	5063				0.112601	0.0630926	0.0533857	0.0582835	0.0685041	0.0758078		K	10	0.169724	0.0939302	0.0918437	0.12449	0.135108	-0.00230774	0
K	11	Sample X251	4590	4837	4960	5073	5262	5383				0.0223383	0.0498708	0.0638966	0.0769724	0.0992609	0.113813		K	11	0.05069	0.0810186	0.0940098	0.10522	0.128546	0.00519038	0
K	12	Sample X252	4487	4641	4533	4878	4656	4631				0.0110997	0.0279552	0.0161015	0.0545224	0.0296139	0.0268511		K	12	0.0682222	0.0587928	0.0545596	0.120729	0.0962176	0.00186636	0
K	13	Sample X253	4863	4876	5109	5148	5143	5160				0.0528178	0.0542949	0.0811771	0.0857536	0.0851656	0.0871663		K	13	0.0811696	0.0854427	0.11129	0.114002	0.11445	0.00221872	0
K	14	Sample X254	4609	4639	4611	4613	4607	4620				0.0244268	0.0277343	0.0246469	0.0248671	0.0242067	0.0256381		K	14	0.0815493	0.0585718	0.063105	0.0910737	0.0908104	0.00061741	0
K	15	Sample X255	4542	4589	4625	4655	4696	4750				0.0170834	0.0222285	0.0261893	0.0295032	0.034052	0.0400779		K	15	0.0454351	0.0533763	0.0563025	0.0577512	0.0633367	0.00119344	0
K	16	Sample X256	4567	4417	4461	4447	4453	4436				0.0198165	0.00354124	0.00828481	0.00677277	0.00742047	0.00558652		K	16	0.076939	0.0343788	0.0467429	0.0729794	0.0740242	-0.00019432	0
K	17	Sample X257	4555	4597	4591	4630	4630	4666				0.0185036	0.0231071	0.0224481	0.0267408	0.0267408	0.0307214		K	17	0.0468553	0.0542549	0.0525613	0.0549888	0.0560255	0.000611346	0
K	18	Sample X258	4476	4422	4479	4408	4419	4416				0.00990769	0.00407902	0.0102326	0.00257406	0.00375631	0.00343372		K	18	0.0670302	0.0349166	0.0486907	0.0687807	0.07036	0.000221989	0
K	19	Sample X259	4317	4212	4090	4219	4245	4287				-0.00714683	-0.0182327	-0.030941	-0.0174979	-0.0147635	-0.0103284		K	19	0.0212049	0.0129151	-0.000827728	0.0107501	0.0145213	-0.000445576	0
K	20	Sample X260	4455	4399	4364	4336	4346	4350				0.00763648	0.00160791	-0.00213939	-0.00512593	-0.00406046	-0.00363391		K	20	0.064759	0.0324455	0.0363187	0.0610807	0.0625432	-0.000147715	0
K	21	Sample X261	4485	4417	4453	4443	4485	4475				0.0108828	0.00354124	0.00742047	0.00634122	0.0108828	0.00979941		K	21	0.0392346	0.034689	0.0375337	0.0345892	0.0401676	6.22006e-05	0
K	22	Sample X262	4672	4144	4147	4678	4371	4082				0.0313865	-0.0253386	-0.0250263	0.0320522	-0.00139119	-0.0317679		K	22	0.088509	0.00549894	0.0134318	0.0982588	0.0652125	-0.0015531	0
K	23	Sample X263	4115	4088	4098	4116	4106	4076				-0.0283517	-0.0311478	-0.0301133	-0.028248	-0.0292847	-0.0323876		K	23	0	0	0	0	0	0	0
K	24	Sample X264	3833	4091	4017	3742	3738	3757				-0.0571225	-0.0308376	-0.0384581	-0.0662066	-0.0666037	-0.0647158		K	24	0	0	0	0	0	0	0
L	1	Sample X265	5704	6314	6815	7222	7618	8113				0.153528	0.233769	0.304814	0.366319	0.429739	0.514474		L	1	0.218543	0.300571	0.372013	0.432526	0.495449	0.0184605	0
L	2	Sample X266	11165	14022	15934	17258	18465	19455				1.22437	2.44755	4.02907	6.05855	9.71948	16.8557		L	2	1.12236	2.36074	3.98821	6.09527	9.63185	0.567299	0
L	3	Sample X267	5250	5769	6272	6729	7244	7672				0.0978299	0.161774	0.228032	0.292265	0.369747	0.438679		L	3	0.162844	0.228576	0.295231	0.358472	0.435457	0.0181742	0
L	4	Sample X268	8884	11660	13468	15260	16427	17129				0.660187	1.38299	2.13833	3.35238	4.64895	5.80057		L	4	0.558178	1.29618	2.09747	3.3891	4.56131	0.266876	0
L	5	Sample X269	5046	5509	5950	6346	6812	7203				0.0738313	0.129206	0.185108	0.238162	0.304374	0.363368		L	5	0.138845	0.196009	0.252307	0.304368	0.370084	0.0154159	0
L	6	Sample X270	7104	9066	10499	11664	12613	13405				0.348118	0.697319	1.03443	1.38434	1.74079	2.106		L	6	0.246108	0.610506	0.993565	1.42105	1.65315	0.0938028	0
L	7	Sample X271	5224	5636	5851	6411	6776	7238				0.0947368	0.144977	0.172276	0.247144	0.299105	0.368811		L	7	0.159751	0.211779	0.239475	0.313351	0.364815	0.0136709	0
L	8	Sample X272	6302	7700	8719	9860	10977	11535				0.232126	0.443342	0.627471	0.873439	1.16821	1.34138		L	8	0.130117	0.356529	0.586609	0.910153	1.08057	0.0633634	0
L	9	Sample X273	4972	5179	5653	5979	6293	6622				0.0652764	0.0894074	0.147108	0.188898	0.230896	0.276861		L	9	0.130291	0.15621	0.214307	0.255105	0.296606	0.0110877	0
L	10	Sample X274	5538	6005	6500	7299	8279	8501				0.132785	0.192309	0.259574	0.378365	0.544361	0.585565		L	10	0.0307751	0.105496	0.218712	0.415078	0.456723	0.0283965	0
L	11	Sample X275	5021	5123	5426	5649	5898	6218				0.0709323	0.0828174	0.119038	0.146606	0.178347	0.220703		L	11	0.135946	0.14962	0.186237	0.212813	0.244057	0.00720736	0
L	12	Sample X276	5063	5555	5927	6259	6726	6811				0.0758078	0.134889	0.182112	0.226263	0.29183	0.304227		L	12	-0.0262019	0.0480757	0.14125	0.262976	0.204193	0.0153596	0
L	13	Sample X277	4821	4854	4937	5117	5301	5497				0.0480619	0.0517966	0.0612576	0.082114	0.103927	0.12773		L	13	0.113076	0.118599	0.128457	0.148321	0.169637	0.0037707	0
L	14	Sample X278	4461	4682	4864	5069	5308	5419				0.00828481	0.0324962	0.0529314	0.0765064	0.104767	0.118185		L	14	-0.0937249	-0.0543168	0.0120694	0.11322	0.0171289	0.00739025	0
L	15	Sample X279	4590	4684	4738	4748	4797	4891				0.0223383	0.0327183	0.0387354	0.039854	0.0453553	0.0560022		L	15	0.0873524	0.0995205	0.105934	0.106061	0.111065	0.00158086	0
L	16	Sample X280	4612	4528	4671	4741	4798	5060				0.024757	0.0155565	0.0312756	0.0390708	0.0454679	0.0754587		L	16	-0.0772527	-0.0712565	-0.00958633	0.0757841	-0.0421698	0.00233886	0
L	17	Sample X281	4303	4333	4376	4401	4442	4473				-0.00863297	-0.00544533	-0.000856372	0.00182252	0.00623337	0.00958288		L	17	0.0563812	0.0613569	0.0663427	0.0680291	0.0719433	0.00103748	0
L	18	Sample X282	4238	4365	4506	4472	4671	4737				-0.0155005	-0.00203254	0.0131623	0.00947464	0.0312756	0.0386236		L	18	-0.11751	-0.0888455	-0.0276997	0.0461879	-0.0563621	0.00407654	0
L	19	Sample X283	4155	4259	4256	4234	4252	4265				-0.024193	-0.0132876	-0.013604	-0.0159214	-0.0140258	-0.0126543		L	19	0.0408212	0.0535146	0.053595	0.0502852	0.0516841	0.000724197	0
L	20	Sample X284	4442	4310	4231	4209	4213	4247				0.00623337	-0.00789021	-0.0162369	-0.0185474	-0.0181277	-0.0145528		L	20	-0.0957763	-0.0947032	-0.0570989	0.0181659	-0.105765	-0.00066594	0
L	21	Sample X285	4007	4295	4081	4110	4125	4121				-0.0394828	-0.00948108	-0.0318712	-0.0288702	-0.0273139	-0.0277292		L	21	0.0255314	0.0573211	0.0353278	0.0373364	0.0383961	0.000857647	0
L	22	Sample X286	4038	3925	4069	4040	4096	4135				-0.0363022	-0.0478404	-0.0331101	-0.0360966	-0.0303203	-0.0262748		L	22	-0.138312	-0.134653	-0.073972	0.000616643	-0.117958	0.00135693	0
L	23	Sample X287	3754	3736	3732	3742	3747	3737				-0.0650142	-0.0668022	-0.067199	-0.0662066	-0.06571	-0.066703		L	23	0	0	0	0	0	0	0
L	24	Sample X288	5285	5157	4757	4034	5164	4096				0.10201	0.0868129	0.040862	-0.0367133	0.0876377	-0.0303203		L	24	0	0	0	0	0	0	0
M	1	Sample X289	5887	7003	8277	9470	10457	11356				0.176923	0.332782	0.543996	0.783914	1.02325	1.28365		M	1	0.209104	0.360718	0.571829	0.815475	1.0545	0.0563598	0
M	2	Sample X290	9586	12048	13659	14856	15878	16663				0.809906	1.51952	2.2397	3.01736	3.96613	4.99499		M	2	0.860076	1.56858	2.29471	3.06133	4.01822	0.210543	0
M	3	Sample X291	6747	8460	9836	11079	12070	12933				0.294879	0.577846	0.86775	1.19841	1.52761	1.87977		M	3	0.327061	0.605783	0.895583	1.22997	1.55887	0.0821204	0
M	4	Sample X292	7270	9179	10588	11705	12635	13441				0.373812	0.720946	1.05841	1.39824	1.75	2.12441		M	4	0.423983	0.770003	1.11342	1.44222	1.80209	0.0918741	0
M	5	Sample X293	6233	7774	9032	10129	11134	11962				0.222733	0.455762	0.690297	0.938915	1.21496	1.48825		M	5	0.254915	0.483699	0.71813	0.970476	1.24621	0.0660864	0
M	6	Sample X294	6090	7192	8314	9184	9917	10489				0.203543	0.361662	0.550762	0.722002	0.887049	1.03176		M	6	0.253713	0.410719	0.605774	0.76598	0.939139	0.0456951	0
M	7	Sample X295	6425	7967	8833	9925	10806	11600				0.24909	0.488815	0.649981	0.88897	1.11891	1.36288		M	7	0.281271	0.516752	0.677814	0.920532	1.15016	0.0579263	0
M	8	Sample X296	5204	6011	6775	7900	7789	8885				0.0923645	0.193098	0.298959	0.477231	0.458296	0.660388		M	8	0.142535	0.242155	0.353971	0.521208	0.510386	0.0245234	0
M	9	Sample X297	6032	7171	8141	9004	9734	10458				0.195864	0.358415	0.519461	0.684544	0.843841	1.02351		M	9	0.228045	0.386351	0.547294	0.716105	0.875092	0.0431365	0
M	10	Sample X298	5222	5396	5717	6099	6487	6737				0.0944993	0.115389	0.155172	0.20474	0.257749	0.293426		M	10	0.14467	0.164446	0.210184	0.248718	0.309839	0.0110113	0
M	11	Sample X299	5766	6665	7662	8189	8722	9608				0.161392	0.283024	0.437018	0.528061	0.628058	0.814895		M	11	0.193573	0.310961	0.464851	0.559623	0.659309	0.0310491	0
M	12	Sample X300	5055	5139	5248	5377	5551	5710				0.0748772	0.0846955	0.0975916	0.113086	0.134393	0.154287		M	12	0.125047	0.133752	0.152604	0.157063	0.186483	0.00409573	0
M	13	Sample X301	5387	5990	6374	6905	7342	7685				0.114297	0.19034	0.242022	0.31811	0.385151	0.440841		M	13	0.146479	0.218277	0.269854	0.349671	0.416402	0.0179949	0
M	14	Sample X302	4666	4698	4838	4963	5037	5137				0.0307214	0.0342744	0.049984	0.0642414	0.0727866	0.0844605		M	14	0.0808917	0.0833312	0.104996	0.108219	0.124877	0.00293235	0
M	15	Sample X303	5058	5238	5456	5656	5913	6101				0.075226	0.0964011	0.122701	0.147484	0.180292	0.205006		M	15	0.107407	0.124338	0.150534	0.179046	0.211543	0.00694242	0
M	16	Sample X304	4626	4663	4709	4719	4784	4814				0.0262995	0.030389	0.035499	0.0366137	0.0438925	0.0472717		M	16	0.0764698	0.0794458	0.0905115	0.0805911	0.0959828	0.00130086	0
M	17	Sample X305	4796	4931	5013	5148	5286	5412				0.0452427	0.0605704	0.0700065	0.0857536	0.102129	0.117334		M	17	0.0774238	0.0885072	0.0978395	0.117315	0.133381	0.00373045	0
M	18	Sample X306	4698	4511	4591	4644	4666	4708				0.0342744	0.0137059	0.0224481	0.0282867	0.0307214	0.0353876		M	18	0.0844447	0.0627626	0.0774606	0.0722641	0.0828116	-0.000108873	0
M	19	Sample X307	4603	4733	4765	4784	4833	4947				0.0237667	0.0381766	0.0417589	0.0438925	0.0494182	0.0624041		M	19	0.0559478	0.0661133	0.0695918	0.0754538	0.0806694	0.00164811	0
M	20	Sample X308	4227	4207	4304	4350	4311	4314				-0.0166575	-0.0187571	-0.0085269	-0.00363391	-0.00778405	-0.0074655		M	20	0.0335128	0.0302997	0.0464856	0.0403434	0.0443062	0.000719557	0
M	21	Sample X309	4626	4598	4629	4653	4673	4894				0.0262995	0.023217	0.0266304	0.0292819	0.0314974	0.056344		M	21	0.0584807	0.0511538	0.0544634	0.0608432	0.0627486	0.000284531	0
M	22	Sample X310	4547	4328	4365	4402	4542	4464				0.0176294	-0.0059774	-0.00203254	0.00192985	0.0170834	0.00860915		M	22	0.0677996	0.0430794	0.05298	0.0459072	0.0691736	9.16e-05	0
M	23	Sample X311	4078	4119	4120	4084	4087	4064				-0.0321811	-0.0279367	-0.027833	-0.0315613	-0.0312512	-0.0336257		M	23	0	0	0	0	0	0	0
M	24	Sample X312	3902	3913	3854	3963	3883	4042				-0.0501703	-0.0490568	-0.0550125	-0.0439774	-0.0520902	-0.035891		M	24	0	0	0	0	0	0	0
N	1	Sample X313	6243	7627	8674	9600	10476	11245				0.224089	0.431224	0.6187	0.813078	1.0283	1.24892		N	1	0.28081	0.479774	0.664001	0.869398	1.08089	0.0533386	0
N	2	Sample X314	7937	9936	11159	12344	13325	14562				0.483613	0.891617	1.22254	1.63186	2.06571	2.79977		N	2	0.543141	0.960995	1.29685	1.70371	2.1344	0.106084	0
N	3	Sample X315	6020	7076	7953	8894	9758	10541				0.194282	0.343844	0.486385	0.662199	0.849428	1.04569		N	3	0.251003	0.392394	0.531685	0.718518	0.902023	0.0434013	0
N	4	Sample X316	6944	8620	10040	11137	11924	12678				0.323924	0.608258	0.916898	1.21587	1.47462	1.76816		N	4	0.383452	0.677637	0.991208	1.28772	1.54331	0.0773239	0
N	5	Sample X317	5668	6682	7577	8400	9112	9725				0.148992	0.285471	0.423	0.56664	0.706883	0.841752		N	5	0.205713	0.334021	0.468301	0.622959	0.759478	0.0369177	0
N	6	Sample X318	5949	7030	8029	8897	9645	10356				0.184977	0.33686	0.499641	0.662803	0.823329	0.996729		N	6	0.244505	0.406238	0.573952	0.734651	0.892014	0.0431673	0
N	7	Sample X319	5617	6728	7209	8151	8903	9549				0.142601	0.29212	0.364299	0.521248	0.664012	0.801558		N	7	0.199322	0.340671	0.4096	0.577567	0.716607	0.0344856	0
N	8	Sample X320	4974	5678	6274	6878	7490	7967				0.0655066	0.15025	0.228304	0.314104	0.408835	0.488815		N	8	0.125034	0.219628	0.302615	0.385952	0.47752	0.0234991	0
N	9	Sample X321	5218	6044	6799	7392	7941	8491				0.0940245	0.197448	0.302468	0.393095	0.484305	0.583678		N	9	0.150745	0.245998	0.347769	0.449414	0.5369	0.0257437	0
N	10	Sample X322	4934	4987	5377	5786	6148	6512				0.0609139	0.0670042	0.113086	0.163942	0.211282	0.261261		N	10	0.120442	0.136383	0.187397	0.23579	0.279968	0.0106351	0
N	11	Sample X323	5098	5929	6528	7159	7687	8159				0.0798903	0.182372	0.263516	0.356563	0.441174	0.522679		N	11	0.136611	0.230922	0.308817	0.412882	0.493769	0.0238105	0
N	12	Sample X324	4672	4750	4891	5049	5261	5457				0.0313865	0.0400779	0.0560022	0.0741798	0.0991415	0.122823		N	12	0.0909141	0.109456	0.130313	0.146028	0.167827	0.00512753	0
N	13	Sample X325	4796	5346	5691	6038	6421	6756				0.0452427	0.109339	0.151888	0.196656	0.248533	0.296189		N	13	0.101964	0.157889	0.197189	0.252975	0.301128	0.0132776	0
N	14	Sample X326	4236	4305	4340	4444	4574	4680				-0.015711	-0.00842082	-0.0046999	0.00644909	0.0205832	0.0322741		N	14	0.0438166	0.0609575	0.069611	0.0782972	0.0892688	0.00303014	0
N	15	Sample X327	4370	4719	4974	5165	5394	5599				-0.00149811	0.0366137	0.0655066	0.0877556	0.115147	0.140356		N	15	0.0552229	0.0851639	0.110807	0.144075	0.167741	0.00750123	0
N	16	Sample X328	4457	4329	4420	4460	4508	4534				0.00785254	-0.00587101	0.00386387	0.00817672	0.0133797	0.0162106		N	16	0.0673801	0.0635073	0.0781747	0.0800249	0.0820652	0.000979004	0
N	17	Sample X329	4334	4382	4478	4651	4786	4918				-0.00533888	-0.00021417	0.0101243	0.0290607	0.0441174	0.0590832		N	17	0.0513821	0.048336	0.0554252	0.08538	0.0967122	0.00302201	0
N	18	Sample X330	3986	3870	3952	4067	4138	4203				-0.0416308	-0.0534014	-0.0450974	-0.0333164	-0.0259629	-0.0191765		N	18	0.0178968	0.0159769	0.0292135	0.0385318	0.0427227	0.00165506	0
N	19	Sample X331	4264	4305	4358	4442	4497	4566				-0.0127599	-0.00842082	-0.00278021	0.00623337	0.0121847	0.019707		N	19	0.0439611	0.0401293	0.0425207	0.0625527	0.0647794	0.00138789	0
N	20	Sample X332	4112	4145	4124	4141	4131	4128				-0.0286628	-0.0252345	-0.0274177	-0.0256508	-0.0266906	-0.0270023		N	20	0.0308648	0.0441438	0.0468931	0.0461974	0.0419949	0.000742011	0
N	21	Sample X333	4163	4188	4223	4258	4287	4315				-0.0233589	-0.0207472	-0.0170778	-0.0133931	-0.0103284	-0.00735929		N	21	0.0333621	0.027803	0.0282231	0.0429262	0.0422664	0.00059362	0
N	22	Sample X334	3930	3794	3843	3877	3935	3996				-0.0473331	-0.0610274	-0.0561184	-0.0526956	-0.0468255	-0.0406086		N	22	0.0121945	0.00835094	0.0181925	0.0191525	0.02186	0.000644369	0
N	23	Sample X335	3837	3918	3950	3841	3878	3858				-0.056721	-0.0485502	-0.0453009	-0.0563193	-0.0525948	-0.05461		N	23	0	0	0	0	0	0	0
N	24	Sample X336	3809	3710	3660	3685	3717	3701				-0.0595276	-0.0693784	-0.0743109	-0.0718482	-0.0686855	-0.0702683		N	24	0	0	0	0	0	0	0
O	1	Sample X337	5667	7261	8513	9522	10391	11055				0.148866	0.372404	0.587834	0.795501	1.00586	1.19125		O	1	0.210393	0.426309	0.651555	0.857327	1.06459	0.0569464	0
O	2	Sample X338	10212	12865	14452	15413	16267	16970				0.959773	1.84933	2.72335	3.4918	4.43377	5.50503		O	2	0.985736	1.86588	2.74032	3.50762	4.45127	0.231035	0
O	3	Sample X339	5398	6687	7941	9068	9781	10269				0.115632	0.286192	0.484305	0.697733	0.854804	0.974284		O	3	0.177159	0.340097	0.548026	0.75956	0.913531	0.0490915	0
O	4	Sample X340	7955	10151	11898	13041	13910	14735				0.486731	0.944412	1.46537	1.92918	2.38117	2.92535		O	4	0.512694	0.960965	1.48234	1.945	2.39866	0.125731	0
O	5	Sample X341	5315	6390	7577	8446	9028	9580				0.105607	0.244234	0.423	0.575222	0.689474	0.808549		O	5	0.167134	0.298139	0.486721	0.637048	0.7482	0.0387377	0
O	6	Sample X342	6656	8032	9432	10340	11144	11847				0.281731	0.500167	0.775513	0.992574	1.21799	1.44735		O	6	0.307694	0.51672	0.792485	1.00839	1.23549	0.0618527	0
O	7	Sample X343	5176	6311	7005	7766	8500	9023				0.0890532	0.233358	0.333083	0.454412	0.585376	0.688445		O	7	0.15058	0.287263	0.396804	0.516239	0.644103	0.0329015	0
O	8	Sample X344	5656	6487	7223	7948	8573	9165				0.147484	0.257749	0.366475	0.485518	0.599244	0.717995		O	8	0.173447	0.274301	0.383448	0.501334	0.616742	0.029553	0
O	9	Sample X345	4866	5898	6641	7336	7954	8511				0.0531585	0.178347	0.27958	0.384201	0.486558	0.587456		O	9	0.114685	0.232252	0.3433	0.446027	0.545285	0.0287066	0
O	10	Sample X346	5281	5732	6109	6561	6988	7367				0.101531	0.157072	0.206072	0.268181	0.330523	0.389115		O	10	0.127494	0.173624	0.223045	0.283997	0.348021	0.0147018	0
O	11	Sample X347	4850	5654	6264	6804	7345	7777				0.0513431	0.147233	0.226943	0.303201	0.385626	0.456268		O	11	0.11287	0.201138	0.290663	0.365027	0.444352	0.0220988	0
O	12	Sample X348	4913	5218	5414	5536	5861	6036				0.0585119	0.0940245	0.117577	0.132538	0.173565	0.196392		O	12	0.0844748	0.110577	0.13455	0.148354	0.191062	0.00710584	0
O	13	Sample X349	4638	5105	5545	6019	6427	6787				0.0276238	0.080709	0.133651	0.194151	0.249368	0.300712		O	13	0.0891506	0.134614	0.197371	0.255977	0.308094	0.0145963	0
O	14	Sample X350	4522	4672	4780	5051	5047	5152				0.0149029	0.0313865	0.0434429	0.0744122	0.0739475	0.0862243		O	14	0.0408658	0.0479389	0.0604157	0.0902284	0.0914454	0.00337197	0
O	15	Sample X351	4482	4702	4989	5209	5467	5689				0.0105577	0.0347196	0.0672348	0.092957	0.124047	0.151636		O	15	0.0720844	0.0886248	0.130955	0.154783	0.182774	0.00737931	0
O	16	Sample X352	4592	4614	4649	4779	4889	4905				0.0225579	0.0249772	0.0288395	0.0433306	0.0557743	0.0575985		O	16	0.0485207	0.0415295	0.0458122	0.0591468	0.0732723	0.0016501	0
O	17	Sample X353	4286	4446	4551	4738	4927	5115				-0.0104342	0.00666486	0.0180664	0.0387354	0.0601126	0.0818797		O	17	0.0510925	0.0605701	0.0817869	0.100562	0.118839	0.00451645	0
O	18	Sample X354	4779	4657	4701	4743	4831	4827				0.0433306	0.0297246	0.0346083	0.0392945	0.049192	0.0487398		O	18	0.0692934	0.0462769	0.051581	0.0551107	0.06669	-0.000173565	0
O	19	Sample X355	3906	4076	4165	4248	4316	4406				-0.0497655	-0.0323876	-0.0231502	-0.0144474	-0.00725306	0.00235927		O	19	0.0117612	0.0215176	0.0405703	0.0473788	0.0514736	0.00264749	0
O	20	Sample X356	4442	4457	4445	4428	4492	4526				0.00623337	0.00785254	0.00655697	0.00472478	0.011642	0.0153386		O	20	0.0321962	0.0244049	0.0235297	0.020541	0.0291399	-0.000203754	0
O	21	Sample X357	4352	4464	4453	4521	4587	4619				-0.00342056	0.00860915	0.00742047	0.014794	0.0220089	0.0255279		O	21	0.0581062	0.0625144	0.071141	0.0766202	0.0807356	0.00150862	0
O	22	Sample X358	4357	4283	4327	4394	4467	4477				-0.00288697	-0.0107517	-0.00608377	0.00107162	0.00893361	0.010016		O	22	0.0230759	0.00580061	0.010889	0.0168878	0.0264315	0.000223709	0
O	23	Sample X359	3789	3865	3767	3786	3817	3816				-0.0615268	-0.0539052	-0.0637205	-0.0618262	-0.0587266	-0.0588268		O	23	0	0	0	0	0	0	0
O	24	Sample X360	4138	4228	4224	4235	4219	4232				-0.0259629	-0.0165523	-0.0169727	-0.0158162	-0.0174979	-0.0161318		O	24	0	0	0	0	0	0	0
P	1	Sample X361	15719	16069	16124	16121	16118	16073					16	16073	18600		4.7458		P	1	0	16	12974	14548	0		1			11563	#DIV/0!
P	2	Sample X362	19161	17991	17085	18392	18602	18600									13.0741		P	2	0	0	0	0	0
P	3	Sample X363	15487	15048	15365	15396	15485	15407					8	15407	17686		3.90279		P	3	0	8	12308	13634	0		0.5			11033.7	#DIV/0!
P	4	Sample X364	17090	18083	17581	17932	17655	17686									8.38923		P	4	0	0	0	0	0
P	5	Sample X365	12782	12650	12582	12658	12617	12630					4	12630	16234		1.90793		P	5	0	4	9531	12182	0		0.25			9622.67	#DIV/0!
P	6	Sample X366	16383	15641	15991	16219	16278	16234									4.98827		P	6	0	0	0	0	0		0
P	7	Sample X367	10192	10012	10264	10282	10458	10545					2	10545	12811		1.13505		P	7	0	2	7446	8759	0		0.125			7786	#DIV/0!
P	8	Sample X368	13613	12457	11748	12237	13037	12811									1.99457		P	8	0	0	0	0	0
P	9	Sample X369	7992	7941	8048	8176	8042	8040					1	8040	9570		0.546059		P	9	0	1	4941	5518	0		0.0625			5870.33	#DIV/0!
P	10	Sample X370	8832	9438	9123	9199	9458	9570									0.873974		P	10	0	0	0	0	0
P	11	Sample X371	6080	6567	6317	6357	6432	6455					0.5	6455	7187		0.281213		P	11	0	0.5	3356	3135	0		0.03125			4547.5	#DIV/0!
P	12	Sample X372	6542	6791	6837	7155	7190	7187									0.395743		P	12	0	0	0	0	0
P	13	Sample X373	5247	5174	5103	5222	5294	5452					0.25	5452	6619		0.142267		P	13	0	0.25	2353	2567	0		0.015625			4023.75	#DIV/0!
P	14	Sample X374	5971	6043	6323	6435	6523	6619									0.305829		P	14	0	0	0	0	0
P	15	Sample X375	4482	4349	4578	4405	4467	4497					0.125	4497	5450		0.0260654		P	15	0	0.125	1398	1398	0		0			3315.71	#DIV/0!
P	16	Sample X376	4878	4835	5046	5195	5269	5450									0.142008		P	16	0	0	0	0	0
P	17	Sample X377	3716	3827	3809	3873	3896	3883					0.0625	3883	4772		-0.0416284		P	17	0	0.0625	784	720	0
P	18	Sample X378	4248	4462	4604	4798	4773	4772									0.0580881		P	18	0	0	0	0	0
P	19	Sample X379	3647	3786	3717	3726	3747	3730					0.03125	3730	4468		-0.0577294		P	19	0	0.03125	631	416	0
P	20	Sample X380	4032	4462	4312	4565	4463	4468									0.0227521		P	20	0	0	0	0	0
P	21	Sample X381	3564	3489	3502	3532	3764	3905					0.015625	3905	4443		-0.039289		P	21	0	0.015625	806	391	0
P	22	Sample X382	4288	4283	5283	4381	4590	4443									0.0199054		P	22	0	0	0	0	0
P	23	Sample X383	3233	2969	2985	3062	3109	3099					0	3099	4052		-0.121157		P	23	0	0	0	0	0
P	24	Sample X384	3619	3571	3787	3835	3895	4052									-0.0234974		P	24	0	0	0	0	0
[truncated: 12 more columns]
