# Supplementary material for: PDZ-directed substrate recruitment is the primary determinant of specific 4E-BP1 dephosphorylation by PP1-Neurabin
Source: eLife journal article supplement (doi:10.7554/elife.103403), 2024-11-20
Supplement: fig5-data1 [file elife-103403-fig5-data1-v1.zip]

## Sheet: All Cycles
Well Row	Well Col	Content	Raw Data (425-10/460-20)	Raw Data (425-10/460-20)	Raw Data (425-10/460-20)	Raw Data (425-10/460-20)	Raw Data (425-10/460-20)	Raw Data (425-10/460-20)			Content	Raw Data (425-10/460-20)	Raw Data (425-10/460-20)	Raw Data (425-10/460-20)	Raw Data (425-10/460-20)	Raw Data (425-10/460-20)	Raw Data (425-10/460-20)	Content	Well Row	Well Col	Raw Data (425-10/460-20)	Raw Data (425-10/460-20)	Raw Data (425-10/460-20)	Raw Data (425-10/460-20)	Raw Data (425-10/460-20)						PP1-Neb 0.25nM																PP1-Ph1 1.25 nM
		Time [s]	0	180	360	540	720	900			Time [s]	0	180	360	540	720	900	Time [s]			0	3	6	9	12						4EBP-70-PDZ	4EBP-70-SGS	IRSp53-PDZ	IRSp53-SGS	4EBP-101-PDZ	4EBP-101-SGS	L5A-PDZ	L5A-SGS	V1	V2	V3	V5	V6	V7	V8		4EBP-70-PDZ	4EBP-70-SGS	IRSp53-PDZ
A	1	Sample X1	7267	8252	8445	8720	9370	9807				0.373343	0.539447	0.575035	0.627667	0.761922	0.860908		A	1	0.147216	0.321984	0.433432	0.480935	0.619196	0.0314653	0			400	0.0314653	0.000651851	0.0386169	0.00401136	-0.000344788	-0.00344724	0.0219879	-0.00176759	0.195692	0.0156508	0.00752025	0.0184835	0.0525703	0.0275714	0.0239772		0.0164358	0.00240897	0.0372317
A	2	Sample X2	5367	5750	6183	6650	7014	7448				0.111875	0.159356	0.215982	0.28087	0.334441	0.402061		A	2	0.142816	0.201804	0.267769	0.333566	0.389353	0.0164358	0			200	0.0148544	-0.00100829	0.0419501	0.00107576	0.000733928	-0.000118914	0.0180337	0.00107191	0.131509	0.0146956	0.00765603	0.0179139	0.0522159	0.0293524	0.023595		0.00756877	0.00294868	0.0342586
A	3	Sample X3	7017	7344	6958	7356	7883	8361				0.334894	0.385467	0.326019	0.387369	0.47431	0.559413		A	3	0.108768	0.168004	0.184417	0.240638	0.331584	0.0148544	0			100	0.0230074	-0.000670751	0.0338238	0.00324718	-0.00089288	0.00150522	0.02301	0.00237025	0.101239	0.0194358	0.00608821	0.0173488	0.0429793	0.0254661	0.0269088		0.00175006	0.0011773	0.0207852
A	4	Sample X4	4690	4868	5025	5221	5458	5700				0.0333849	0.0533857	0.0713955	0.0943806	0.122946	0.153023		A	4	0.0643259	0.0958334	0.123183	0.147076	0.177857	0.00756877	0			50	0.020953	-0.00482524	0.0325689	0.00101444	-0.00158843	0.00073308	0.0193494	0.00124648	0.0802163	0.0162782	0.00664394	0.0118875	0.033348	0.0248286	0.020663		-0.000666576	-0.00376484	0.0210461
A	5	Sample X5	6049	6491	6682	7265	7798	8143				0.198109	0.25831	0.285471	0.37303	0.45982	0.519818		A	5	-0.028018	0.0408469	0.143868	0.226298	0.317094	0.0230074	0			25	0.0262033	-0.00178952	0.0310209	0.000130089	0.00084989	0.000326027	0.0188208	0.000244738	0.0739073	0.0136788	0.00578062	0.0104551	0.0301037	0.0227468	0.0200017		-0.00322917	0.00252577	0.0235159
A	6	Sample X6	5296	5238	5329	5290	5315	5510				0.103327	0.0964011	0.107291	0.102608	0.105607	0.12933		A	6	0.134268	0.138849	0.159078	0.155304	0.160519	0.00175006	0			12.5	0.0128492	-0.00156518	0.024093	-0.000287056	-0.00144298	0.00115335	0.0112338	-0.000215987	0.0399381	0.0109499	0.00421143	0.00746684	0.0211836	0.0171262	0.0156553		-0.00108185	-0.000650861	0.0162385
A	7	Sample X7	6245	6743	6701	7355	7771	8093				0.224361	0.294298	0.288212	0.38721	0.455256	0.510925		A	7	-0.00176581	0.0768348	0.14661	0.240479	0.31253	0.020953	0			6.25	0.0130702	-0.000819952	0.015643	-0.000490436	-5.86787e-05	-0.000194767	0.00750193	0.000493876	0.0258897	0.00728416	0.00269742	0.0060862	0.0186276	0.0127958	0.0120719		-7.08972e-05	0.00110256	0.0142852
A	8	Sample X8	4702	4554	4643	4524	4391	4431				0.0347196	0.0183943	0.0281762	0.0151207	0.00075	0.00504783		A	8	0.0656605	0.060842	0.0799636	0.0678164	0.0556619	-0.000666576	0			3.125	0.0102715	-0.0010727	0.00914305	-0.000618018	-0.00159035	-0.00101295	0.00357425	0.00010153	0.0161323	0.00431139	0.00124429	0.00442855	0.009775	0.00781217	0.00736978		-0.00053689	-0.00061865	0.0088445
A	9	Sample X9	5711	6309	7030	7474	7823	8164				0.154413	0.233084	0.33686	0.40625	0.464062	0.523574		A	9	-0.0717136	0.0156209	0.195257	0.259518	0.321336	0.0262033	0			1.5625	0.00407652	-0.0029414	0.00483663	-0.000889699	-0.00327521	0.000692592	0.00188792	-5.22112e-06	0.00739551	0.00287062	0.000142801	0.00250934	0.00491751	0.00480019	0.00462705		-0.000544154	-0.000482903	0.00485727
A	10	Sample X10	5311	5087	5008	4794	4684	4822				0.105127	0.0786053	0.0694284	0.0450175	0.0327183	0.0481749		A	10	0.136068	0.121053	0.121216	0.0977132	0.0876302	-0.00322917	0			0.78125	0.00382928	-0.00175926	0.00196923	-0.00139976	-7.40028e-05	-0.000450851	0.00116225	0.00101523	0.00442489	0.00122128	-0.000480065	0.000583068	0.00287018	0.00209392	0.00282664		-0.00133028	0.00215915	0.0015036
A	11	Sample X11	5564	5855	6080	6207	6398	6577				0.136004	0.172791	0.202215	0.219217	0.245342	0.270451		A	11	-0.0901222	-0.044672	0.0606125	0.0724855	0.102616	0.0128492	0			0.390625	0.00231217	-0.000287583	0.00041568	-0.00126933	-0.000152793	0.000937098	0.000438908	0.000733319	0.00152249	0.000727756	-0.000556211	-0.00037308	0.000981864	0.00122078	0.0015681		-0.000706805	0.000811309	0.00142804
A	12	Sample X12	4341	4158	4053	3988	3955	3955				-0.00459336	-0.0238803	-0.0347591	-0.0414265	-0.0447921	-0.0447921		A	12	0.0263476	0.0185674	0.0170283	0.0112692	0.0101198	-0.00108185	0			0	0	0	0	0	0	0	0	0	0	0	0	0	0	0	0		0	0	0
A	13	Sample X13	5759	6063	6340	6413	6596	6678				0.160501	0.199961	0.237337	0.247422	0.273153	0.284895		A	13	-0.065626	-0.0175022	0.0957342	0.100691	0.130427	0.0130702	0
A	14	Sample X14	4847	4677	4596	4604	4623	4608				0.0510031	0.0319412	0.0229973	0.0238767	0.0259688	0.0243167		A	14	0.0819441	0.0743889	0.0747846	0.0765723	0.0808807	-7.08972e-05	0				3	27	51	75	99	123	147	171	195	219	243	267	291	315	339		3	27	51
A	15	Sample X15	5372	5660	5740	5868	5935	6004				0.11248	0.147986	0.158086	0.174467	0.183153	0.192178		A	15	-0.113646	-0.0694767	0.0164839	0.0277361	0.0404266	0.0102715	0				PP1-Neb 0.25nM																PP1-Ph1 1.25 nM
A	16	Sample X16	4506	4342	4337	4238	4206	4199				0.0131623	-0.0044868	-0.00501944	-0.0155005	-0.018862	-0.0195956		A	16	0.0441033	0.0379609	0.0467679	0.0371951	0.0360499	-0.00053689	0				4EBP-70-PDZ	4EBP-70-SGS	IRSp53-PDZ	IRSp53-SGS	4EBP-101-PDZ	4EBP-101-SGS	L5A-PDZ	L5A-SGS	V1	V2	V3	V5	V6	V7	V8		4EBP-70-PDZ	4EBP-70-SGS	IRSp53-PDZ
A	17	Sample X17	6415	6687	6553	6116	6253	6260				0.2477	0.286192	0.267048	0.207005	0.225447	0.226398		A	17	0.0215733	0.0687284	0.125446	0.0602736	0.082721	0.00407652	0		0	400	0.0314653	0.000651851	0.0386169	0.00401136	-0.000344788	-0.00344724	0.0219879	-0.00176759	0.195692	0.0156508	0.00752025	0.0184835	0.0525703	0.0275714	0.0239772		0.0164358	0.00240897	0.0372317
A	18	Sample X18	4237	4048	4093	3975	3926	3902				-0.0156057	-0.0352738	-0.0306307	-0.0427539	-0.047739	-0.0501703		A	18	0.0153352	0.00717395	0.0211567	0.00994178	0.00717292	-0.000544154	0		2	200	0.0148544	-0.00100829	0.0419501	0.00107576	0.000733928	-0.000118914	0.0180337	0.00107191	0.131509	0.0146956	0.00765603	0.0179139	0.0522159	0.0293524	0.023595		0.00756877	0.00294868	0.0342586
A	19	Sample X19	6049	6426	6448	5681	5850	5832				0.198109	0.249229	0.252293	0.150628	0.172147	0.169832		A	19	-0.028018	0.0317656	0.110691	0.00389614	0.0294213	0.00382928	0		4	100	0.0230074	-0.000670751	0.0338238	0.00324718	-0.00089288	0.00150522	0.02301	0.00237025	0.101239	0.0194358	0.00608821	0.0173488	0.0429793	0.0254661	0.0269088		0.00175006	0.0011773	0.0207852
A	20	Sample X20	4710	4555	4505	4317	4306	4270				0.0356104	0.0185036	0.0130536	-0.00714683	-0.00831472	-0.0121262		A	20	0.0665514	0.0609513	0.064841	0.0455488	0.0465972	-0.00133028	0		6	50	0.020953	-0.00482524	0.0325689	0.00101444	-0.00158843	0.00073308	0.0193494	0.00124648	0.0802163	0.0162782	0.00664394	0.0118875	0.033348	0.0248286	0.020663		-0.000666576	-0.00376484	0.0210461
A	21	Sample X21	6243	6191	5832	5820	5875	5859				0.224089	0.217059	0.169832	0.168292	0.175371	0.173307		A	21	-0.0020372	-0.000404266	0.02823	0.0215609	0.0326453	0.00231217	0		8	25	0.0262033	-0.00178952	0.0310209	0.000130089	0.00084989	0.000326027	0.0188208	0.000244738	0.0739073	0.0136788	0.00578062	0.0104551	0.0301037	0.0227468	0.0200017		-0.00322917	0.00252577	0.0235159
A	22	Sample X22	4140	3951	3850	3750	3801	3782				-0.0257548	-0.0451991	-0.0554148	-0.0654118	-0.0603278	-0.0622254		A	22	0.00518615	-0.0027514	-0.00362744	-0.0127162	-0.00541593	-0.000706805	0		10	12.5	0.0128492	-0.00156518	0.024093	-0.000287056	-0.00144298	0.00115335	0.0112338	-0.000215987	0.0399381	0.0109499	0.00421143	0.00746684	0.0211836	0.0171262	0.0156553		-0.00108185	-0.000650861	0.0162385
A	23	Sample X23	6258	6194	5609	5650	5618	5644				0.226127	0.217463	0.141602	0.146731	0.142726	0.145979		A	23	0	0	0	0	0	0	0		12	6.25	0.0130702	-0.000819952	0.015643	-0.000490436	-5.86787e-05	-0.000194767	0.00750193	0.000493876	0.0258897	0.00728416	0.00269742	0.0060862	0.0186276	0.0127958	0.0120719		-7.08972e-05	0.00110256	0.0142852
A	24	Sample X24	4090	3978	3886	3877	3855	3837				-0.030941	-0.0424477	-0.0517874	-0.0526956	-0.0549119	-0.056721		A	24	0	0	0	0	0	0	0		14	3.125	0.0102715	-0.0010727	0.00914305	-0.000618018	-0.00159035	-0.00101295	0.00357425	0.00010153	0.0161323	0.00431139	0.00124429	0.00442855	0.009775	0.00781217	0.00736978		-0.00053689	-0.00061865	0.0088445
B	1	Sample X25	6350	6416	6109	6303	6392	6405				0.238712	0.247839	0.206072	0.232263	0.244511	0.246312		B	1	0.23291	0.246982	0.202423	0.229689	0.242688	0.000651851	0		16	1.5625	0.00407652	-0.0029414	0.00483663	-0.000889699	-0.00327521	0.000692592	0.00188792	-5.22112e-06	0.00739551	0.00287062	0.000142801	0.00250934	0.00491751	0.00480019	0.00462705		-0.000544154	-0.000482903	0.00485727
B	2	Sample X26	5193	5115	5130	5174	5338	5413				0.0910622	0.0818797	0.0836386	0.0888172	0.108375	0.117455		B	2	0.087951	0.0919963	0.0979806	0.10642	0.124086	0.00240897	0		18	0.78125	0.00382928	-0.00175926	0.00196923	-0.00139976	-7.40028e-05	-0.000450851	0.00116225	0.00101523	0.00442489	0.00122128	-0.000480065	0.000583068	0.00287018	0.00209392	0.00282664		-0.00133028	0.00215915	0.0015036
B	3	Sample X27	5842	5642	5402	5623	5692	5700				0.171118	0.145728	0.116118	0.143351	0.152014	0.153023		B	3	0.165316	0.144871	0.112469	0.140777	0.150191	-0.00100829	0		20	0.390625	0.00231217	-0.000287583	na	-0.00126933	-0.000152793	0.000937098	0.000438908	0.000733319	0.00152249	0.000727756	-0.000556211	-0.00037308	0.000981864	0.00122078	0.0015681		-0.000706805	0.000811309	0.00142804
B	4	Sample X28	4345	4559	4361	4754	4580	4534				-0.00416707	0.018941	-0.00245986	0.0405259	0.021241	0.0162106		B	4	-0.00727832	0.0290576	0.0118822	0.0581288	0.0369519	0.00294868	0		22	0	0	0	0	0	0	0	0	0	0	0	0	0	0	0	0		0	0	0
B	5	Sample X29	5566	5883	5654	5571	5452	5547				0.136253	0.176405	0.147233	0.136873	0.122212	0.133898		B	5	0.13045	0.175548	0.143584	0.134299	0.120389	-0.000670751	0
B	6	Sample X30	4280	4329	4388	4492	4269	4719				-0.0110691	-0.00587101	0.000428494	0.011642	-0.0122319	0.0366137		B	6	-0.0141804	0.00424562	0.0147705	0.0292449	0.00347912	0.0011773	0
B	7	Sample X31	6034	5597	5634	5471	5432	5429				0.196128	0.140106	0.144727	0.124538	0.11977	0.119404		B	7	0.190326	0.139249	0.141078	0.121963	0.117947	-0.00482524	0
B	8	Sample X32	5335	4756	4910	4843	4684	4681				0.108013	0.0407499	0.0581693	0.05055	0.0327183	0.0323852		B	8	0.104902	0.0508666	0.0725113	0.068153	0.0484292	-0.00376484	0
B	9	Sample X33	5826	5941	5643	5765	5582	5613				0.169062	0.183934	0.145854	0.161264	0.13824	0.142102		B	9	0.16326	0.183077	0.142205	0.15869	0.136417	-0.00178952	0
B	10	Sample X34	4678	4764	4893	4994	4848	4836				0.0320522	0.0416467	0.05623	0.0678115	0.0511165	0.0497576		B	10	0.0289409	0.0517633	0.0705721	0.0854145	0.0668274	0.00252577	0
B	11	Sample X35	5481	5437	5379	5389	5254	5295				0.125764	0.120379	0.113328	0.11454	0.0983066	0.103207		B	11	0.119962	0.119522	0.109679	0.111966	0.0964841	-0.00156518	0
B	12	Sample X36	4887	4841	4749	4667	4632	4631				0.0555466	0.0503236	0.039966	0.0308322	0.0269614	0.0268511		B	12	0.0524353	0.0604402	0.054308	0.0484351	0.0426724	-0.000650861	0
B	13	Sample X37	5411	5473	5398	5433	5276	5257				0.117212	0.124783	0.115632	0.119891	0.100933	0.0986644		B	13	0.11141	0.123926	0.111983	0.117317	0.0991106	-0.000819952	0
B	14	Sample X38	4920	4887	4878	4864	4900	4853				0.0593119	0.0555466	0.0545224	0.0529314	0.057028	0.0516832		B	14	0.0562006	0.0656632	0.0688644	0.0705343	0.072739	0.00110256	0
B	15	Sample X39	5354	5238	5236	5314	5186	5191				0.110305	0.0964011	0.0961631	0.105487	0.0902345	0.0908257		B	15	0.104502	0.0955439	0.0925144	0.102913	0.088412	-0.0010727	0
B	16	Sample X40	4843	4726	4596	4576	4591	4535				0.05055	0.0373948	0.0229973	0.0208024	0.0224481	0.0163196		B	16	0.0474388	0.0475114	0.0373393	0.0384054	0.038159	-0.00061865	0
B	17	Sample X41	5733	5481	5539	5506	5344	5363				0.157198	0.125764	0.132908	0.128837	0.109098	0.111392		B	17	0.151396	0.124907	0.12926	0.126263	0.107275	-0.0029414	0
B	18	Sample X42	4894	4725	4666	4697	4662	4685				0.056344	0.0372832	0.0307214	0.0341632	0.0302782	0.0328293		B	18	0.0532327	0.0473998	0.0450634	0.0517661	0.0459892	-0.000482903	0
B	19	Sample X43	5495	5367	5369	5327	5244	5238				0.127484	0.111875	0.112117	0.10705	0.0971152	0.0964011		B	19	0.121682	0.111018	0.108469	0.104476	0.0952927	-0.00175926	0
B	20	Sample X44	4298	4372	4450	4369	4425	4361				-0.00916313	-0.00128425	0.00709656	-0.00160502	0.00440184	-0.00245986		B	20	-0.0122744	0.00883238	0.0214386	0.0159979	0.0201128	0.00215915	0
B	21	Sample X45	4795	4687	4652	4713	4721	4681				0.0451301	0.0330515	0.0291713	0.0359447	0.0368368	0.0323852		B	21	0.039328	0.0321943	0.0255225	0.0333707	0.0350143	-0.000287583	0
B	22	Sample X46	4565	4517	4513	4511	4504	4489				0.0195975	0.0143586	0.0139234	0.0137059	0.0129449	0.0113166		B	22	0.0164863	0.0244752	0.0282654	0.0313088	0.0286559	0.000811309	0
B	23	Sample X47	4438	4392	4418	4408	4401	4411				0.00580208	0.000857194	0.00364877	0.00257406	0.00182252	0.00289633		B	23	0	0	0	0	0	0	0
B	24	Sample X48	4413	4289	4249	4218	4236	4186				0.00311125	-0.0101166	-0.014342	-0.0176029	-0.015711	-0.0209564		B	24	0	0	0	0	0	0	0
C	1	Sample X49	10299	11889	11750	11782	12144	12543				0.981982	1.46217	1.41364	1.42469	1.55514	1.71178		C	1	0.930866	1.41049	1.36739	1.37911	1.51012	0.0386169	0
C	2	Sample X50	9040	9919	10226	10734	11211	11672				0.691946	0.887529	0.963323	1.09865	1.23843	1.38704		C	2	0.717597	0.92342	0.997876	1.13341	1.27607	0.0372317	0
C	3	Sample X51	7872	8567	9107	10037	10723	11182				0.472424	0.598098	0.70584	0.916162	1.09558	1.22955		C	3	0.421308	0.546415	0.659584	0.870581	1.05056	0.0419501	0
C	4	Sample X52	6786	7562	8361	9008	9553	9959				0.300566	0.420545	0.559413	0.685364	0.802458	0.897167		C	4	0.326217	0.456436	0.593966	0.720123	0.840096	0.0342586	0
C	5	Sample X53	6079	6729	7494	8552	9095	9681				0.202082	0.292265	0.409482	0.595238	0.70334	0.831587		C	5	0.150966	0.240582	0.363226	0.549657	0.658323	0.0338238	0
C	6	Sample X54	4941	5763	6484	6782	7191	7701				0.061716	0.16101	0.257328	0.299981	0.361508	0.443509		C	6	0.0873668	0.196901	0.291881	0.33474	0.399145	0.0207852	0
C	7	Sample X55	6324	7159	7702	8458	9163	9704				0.23514	0.356563	0.443676	0.577471	0.717574	0.836891		C	7	0.184023	0.30488	0.397419	0.53189	0.672556	0.0325689	0
C	8	Sample X56	4707	5638	6251	6575	7044	7579				0.0352762	0.145227	0.225175	0.270167	0.338981	0.423328		C	8	0.060927	0.181118	0.259728	0.304926	0.376618	0.0210461	0
C	9	Sample X57	5455	6467	7053	7935	8481	9128				0.122579	0.254948	0.340346	0.483267	0.581794	0.710227		C	9	0.0714621	0.203264	0.29409	0.437687	0.536776	0.0310209	0
C	10	Sample X58	4444	5339	6000	6431	7098	7583				0.00644909	0.108495	0.191652	0.249924	0.347201	0.423984		C	10	0.0320999	0.144386	0.226206	0.284684	0.384838	0.0235159	0
C	11	Sample X59	5736	6515	7037	7663	8104	8617				0.157579	0.261684	0.33792	0.437184	0.512876	0.607681		C	11	0.106462	0.210001	0.291663	0.391603	0.467858	0.024093	0
C	12	Sample X60	4612	5093	5670	6109	6477	6868				0.024757	0.079306	0.149243	0.206072	0.256347	0.312624		C	12	0.0504078	0.115197	0.183796	0.240831	0.293985	0.0162385	0
C	13	Sample X61	5903	6162	6693	7022	7482	7886				0.178995	0.213159	0.287057	0.33565	0.407541	0.474825		C	13	0.127878	0.161476	0.2408	0.290069	0.362524	0.015643	0
C	14	Sample X62	4679	5115	5517	5974	6319	6716				0.0321631	0.0818797	0.130192	0.188244	0.234454	0.290382		C	14	0.0578139	0.117771	0.164745	0.223003	0.272091	0.0142852	0
C	15	Sample X63	5062	5257	5533	5840	6114	6360				0.0756914	0.0986644	0.132167	0.170861	0.206738	0.24009		C	15	0.024575	0.0469811	0.0859102	0.12528	0.161721	0.00914305	0
C	16	Sample X64	4527	4710	4976	5281	5565	5760				0.0154475	0.0356104	0.0657369	0.101531	0.136128	0.160628		C	16	0.0410983	0.0715014	0.10029	0.13629	0.173766	0.0088445	0
C	17	Sample X65	5215	5277	5462	5602	5756	5881				0.0936685	0.101053	0.123435	0.140729	0.160119	0.176147		C	17	0.0425521	0.0493694	0.0771785	0.095149	0.115101	0.00483663	0
C	18	Sample X66	4363	4299	4566	4762	4914	5062				-0.00224622	-0.00905713	0.019707	0.0414224	0.0586261	0.0756914		C	18	0.0234046	0.0268339	0.0542601	0.0761815	0.0962636	0.00485727	0
C	19	Sample X67	5018	5010	5038	5125	5218	5282				0.070585	0.0696596	0.0729026	0.0830519	0.0940245	0.101651		C	19	0.0194686	0.0179764	0.026646	0.0374714	0.049007	0.00196923	0
C	20	Sample X68	4563	4397	4490	4589	4659	4735				0.0193786	0.00139336	0.011425	0.0222285	0.029946	0.0384		C	20	0.0450294	0.0372844	0.0459782	0.0569876	0.0675834	0.0015036	0
C	21	Sample X69	154	150	144	150	156	155				-0.361322	-0.361595	-0.362003	-0.361595	-0.361186	-0.361254		C	21	-0.412439	-0.413278	-0.40826	-0.407175	-0.406203	0.00041568	1
C	22	Sample X70	4159	4261	4227	4217	4249	4277				-0.023776	-0.0130765	-0.0166575	-0.0177079	-0.014342	-0.0113864		C	22	0.00187475	0.0228145	0.0178957	0.0170512	0.0232954	0.00142804	0
C	23	Sample X71	4848	4853	4805	4799	4794	4824				0.0511165	0.0516832	0.0462566	0.0455805	0.0450175	0.0484008		C	23	0	0	0	0	0	0	0
C	24	Sample X72	4141	4042	4055	4053	4025	4026				-0.0256508	-0.035891	-0.0345531	-0.0347591	-0.0376374	-0.0375348		C	24	0	0	0	0	0	0	0
D	1	Sample X73	4486	4813	4872	4937	5054	5159				0.0109912	0.0471588	0.0538402	0.0612576	0.0747609	0.0870485		D	1	0.0231175	0.0646567	0.0681822	0.0678731	0.0832878	0.00401136	0
D	2	Sample X74	7438	8348	9222	9999	10743	11400				0.400455	0.557013	0.730056	0.906874	1.10117	1.29764		D	2	0.415113	0.563948	0.741442	0.919001	1.10895	0.0462558	0
D	3	Sample X75	4213	4357	4408	4383	4399	4522				-0.0181277	-0.00288697	0.00257406	-0.000107091	0.00160791	0.0149029		D	3	-0.00600153	0.014611	0.0169161	0.00650837	0.0101348	0.00107576	0
D	4	Sample X76	6253	7138	8014	8802	9401	10123				0.225447	0.353331	0.497012	0.643818	0.768699	0.937419		D	4	0.240105	0.360265	0.508399	0.655944	0.776483	0.0357585	0
D	5	Sample X77	4304	4522	4833	4829	4783	4770				-0.0085269	0.0149029	0.0494182	0.0489659	0.0437801	0.0423199		D	5	0.00359931	0.0324008	0.0637603	0.0555814	0.052307	0.00324718	0
D	6	Sample X78	5795	6560	7276	8118	8685	9130				0.165091	0.268039	0.374753	0.515363	0.620838	0.710646		D	6	0.17975	0.274974	0.386139	0.527489	0.628622	0.0299248	0
D	7	Sample X79	3949	3926	3975	4023	4132	4188				-0.0454026	-0.047739	-0.0427539	-0.0378427	-0.0265867	-0.0207472		D	7	-0.0332764	-0.0302411	-0.0284118	-0.0312272	-0.0180598	0.00101444	0
D	8	Sample X80	4379	5302	6004	6497	6931	7339				-0.000535329	0.104047	0.192178	0.259152	0.321983	0.384676		D	8	0.0141228	0.110981	0.203564	0.271279	0.329767	0.0210429	0
D	9	Sample X81	3854	3925	3980	3865	3909	3994				-0.0550125	-0.0478404	-0.0422436	-0.0539052	-0.0494618	-0.0408132		D	9	-0.0428863	-0.0303425	-0.0279015	-0.0472898	-0.0409349	0.000130089	0
D	10	Sample X82	4399	5208	5811	6278	6749	7289				0.00160791	0.0928385	0.167139	0.228849	0.29517	0.376793		D	10	0.0162661	0.0997728	0.178525	0.240975	0.302954	0.0191126	0
D	11	Sample X83	3886	3903	3917	3882	3879	3869				-0.0517874	-0.0500691	-0.0486515	-0.0521912	-0.0524939	-0.0535022		D	11	-0.0396611	-0.0325712	-0.0343095	-0.0455757	-0.043967	-0.000287056	0
D	12	Sample X84	4375	5046	5566	6022	6485	6919				-0.000963361	0.0738313	0.136253	0.194546	0.257468	0.320194		D	12	0.0136948	0.0807656	0.147639	0.206672	0.265252	0.0167705	0
D	13	Sample X85	3953	3892	3855	3939	3916	3956				-0.0449956	-0.0511813	-0.0549119	-0.0464192	-0.0487528	-0.0446903		D	13	-0.0328694	-0.0336834	-0.0405699	-0.0398037	-0.0402259	-0.000490436	0
D	14	Sample X86	4622	4826	5450	5801	6195	6612				0.0258585	0.0486268	0.121967	0.165859	0.217598	0.275433		D	14	0.0405167	0.0555611	0.133354	0.177985	0.225382	0.0123244	0
D	15	Sample X87	3787	3748	3814	3753	3730	3741				-0.0617264	-0.0656106	-0.0590271	-0.0651136	-0.0673974	-0.0663059		D	15	-0.0496002	-0.0481127	-0.0446851	-0.0584981	-0.0588705	-0.000618018	0
D	16	Sample X88	4484	4777	5086	5427	5700	5990				0.0107744	0.0431059	0.0784886	0.11916	0.153023	0.19034		D	16	0.0254326	0.0500402	0.0898749	0.131286	0.160807	0.00902498	0
D	17	Sample X89	3804	3589	3659	3727	3706	3677				-0.0600278	-0.0812665	-0.0744092	-0.0676948	-0.069774	-0.072637		D	17	-0.0479016	-0.0637685	-0.0600672	-0.0610794	-0.0612471	-0.000889699	0
D	18	Sample X90	4468	4525	4748	5012	5166	5325				0.00904179	0.0152296	0.039854	0.0698909	0.0878735	0.106809		D	18	0.0236999	0.022164	0.0512404	0.0820171	0.0956575	0.00479717	0
D	19	Sample X91	4235	4246	4202	4065	4068	4072				-0.0158162	-0.0146581	-0.0192813	-0.0335226	-0.0332132	-0.0328005		D	19	-0.00368997	0.00283978	-0.00493922	-0.0269071	-0.0246863	-0.00139976	0
D	20	Sample X92	4563	4578	4676	4794	4924	5001				0.0193786	0.0210217	0.0318302	0.0450175	0.0597693	0.0686196		D	20	0.0340368	0.027956	0.0432166	0.0571437	0.0675534	0.00223444	0
D	21	Sample X93	5780	5778	5706	5646	5658	5684				0.163176	0.162921	0.153781	0.14623	0.147735	0.151005		D	21	0.175302	0.180419	0.168123	0.152845	0.156262	-0.00126933	0
D	22	Sample X94	4318	4180	4315	4374	4412	4497				-0.00704058	-0.0215838	-0.00735929	-0.00107034	0.00300379	0.0121847		D	22	0.00761756	-0.0146495	0.00402709	0.0110559	0.0107878	0.000211352	0
D	23	Sample X95	4270	4219	4249	4322	4304	4332				-0.0121262	-0.0174979	-0.014342	-0.00661546	-0.0085269	-0.00555177		D	23	0	0	0	0	0	0	0
D	24	Sample X96	4246	4319	4277	4270	4311	4308				-0.0146581	-0.00693432	-0.0113864	-0.0121262	-0.00778405	-0.00810249		D	24	0	0	0	0	0	0	0
E	1	Sample X97	5082	5022	5096	5137	5075	5005				0.0780218	0.0710481	0.0796565	0.0844605	0.0772055	0.0690817		E	1	-0.00620383	-0.010129	-0.0017547	-0.00305929	-0.0113756	-0.000344788	0
E	2	Sample X98	6045	6242	6578	6758	6848	6984				0.19758	0.223954	0.270593	0.29648	0.30967	0.329921		E	2	0.226554	0.262207	0.303806	0.3299	0.348845	0.00815277	0
E	3	Sample X99	6071	6162	6644	6484	6186	5936				0.201021	0.213159	0.28001	0.257328	0.216385	0.183283		E	3	0.116795	0.131982	0.198598	0.169808	0.127804	0.000733928	0
E	4	Sample X100	5524	5829	6056	5889	5717	5821				0.131056	0.169447	0.199034	0.177181	0.155172	0.168421		E	4	0.160029	0.2077	0.232248	0.210601	0.194347	0.00228786	0
E	5	Sample X101	4563	4722	4872	4647	4480	4487				0.0193786	0.0369484	0.0538402	0.0286183	0.010341	0.0110997		E	5	-0.064847	-0.0442287	-0.0275711	-0.0589015	-0.0782402	-0.00089288	0
E	6	Sample X102	15388	15804	16159	16057	15691	15574				3.4685	3.88502	4.29648	4.17227	3.76548	3.64691		E	6	3.49748	3.92327	4.32969	4.20569	3.80466	0.0204788	1
E	7	Sample X103	5641	5641	5371	5351	5484	5409				0.145603	0.145603	0.112359	0.109942	0.126132	0.116969		E	7	0.0613776	0.0644261	0.0309481	0.0224225	0.0375511	-0.00158843	0
E	8	Sample X104	4394	4528	4799	4686	4652	4587				0.00107162	0.0155565	0.0455805	0.0329404	0.0291713	0.0220089		E	8	0.0300455	0.0538095	0.0787938	0.0663599	0.0683468	0.00255342	0
E	9	Sample X105	5208	5304	5167	5217	5351	5336				0.0928385	0.104287	0.0879914	0.0939058	0.109942	0.108134		E	9	0.00861286	0.0231095	0.00658015	0.00638601	0.0213612	0.00084989	0
E	10	Sample X106	4190	4322	4609	4502	4476	4536				-0.0205379	-0.00661546	0.0244268	0.0127277	0.00990769	0.0164287		E	10	0.00843592	0.0316375	0.05764	0.0461471	0.0490832	0.00270982	0
E	11	Sample X107	4641	4372	4353	4480	4483	4452				0.0279552	-0.00128425	-0.00331387	0.010341	0.010666	0.00731249		E	11	-0.0562704	-0.0824613	-0.0847251	-0.0771789	-0.0779151	-0.00144298	0
E	12	Sample X108	4140	4176	4129	4059	4093	4029				-0.0257548	-0.0220018	-0.0268984	-0.0341411	-0.0306307	-0.0372268		E	12	0.00321902	0.0162512	0.0063148	-0.000721579	0.00854484	0.000355055	0
E	13	Sample X109	4484	4412	4531	4496	4516	4497				0.0107744	0.00300379	0.0158835	0.0120761	0.0142498	0.0121847		E	13	-0.0734512	-0.0781733	-0.0655278	-0.0754437	-0.0743314	-5.86787e-05	0
E	14	Sample X110	4220	4047	4028	4045	4072	4089				-0.0173929	-0.0353767	-0.0373295	-0.0355824	-0.0328005	-0.0310444		E	14	0.0115809	0.00287632	-0.00411628	-0.00216295	0.006375	-0.000347063	0
E	15	Sample X111	5267	5388	5234	5087	5102	5186				0.0998578	0.114419	0.0959253	0.0786053	0.080358	0.0902345		E	15	0.0156321	0.0332416	0.014514	-0.00891453	-0.00822313	-0.00159035	0
E	16	Sample X112	4002	3842	3887	3886	3937	3918				-0.0399947	-0.0562188	-0.0516864	-0.0517874	-0.0466224	-0.0485502		E	16	-0.0110209	-0.0179658	-0.0184732	-0.0183679	-0.00744684	0.000238269	0
E	17	Sample X113	6407	6100	6051	6019	6077	6058				0.246589	0.204873	0.198373	0.194151	0.201817	0.199299		E	17	0.162364	0.123696	0.116962	0.106631	0.113236	-0.00327521	0
E	18	Sample X114	4293	4307	4297	4246	4259	4242				-0.00969298	-0.00820861	-0.00926913	-0.0146581	-0.0132876	-0.0150794		E	18	0.0192809	0.0300444	0.0239441	0.0187614	0.0258879	0.000440471	0
E	19	Sample X115	4732	4603	4716	4688	4761	4765				0.0380648	0.0237667	0.0362792	0.0331626	0.0413103	0.0417589		E	19	-0.0461608	-0.0574104	-0.0451321	-0.0543572	-0.0472708	-7.40028e-05	0
E	20	Sample X116	4251	4181	4062	4089	4113	4106				-0.0141312	-0.0214793	-0.0338319	-0.0310444	-0.0285592	-0.0292847		E	20	0.0148426	0.0167737	-0.000618678	0.00237509	0.0106164	-0.000281749	0
E	21	Sample X117	4933	4857	5014	5015	4951	4997				0.0607994	0.0521369	0.0701222	0.0702379	0.062863	0.0681578		E	21	-0.0234262	-0.0290402	-0.011289	-0.0172819	-0.0257181	-0.000152793	0
E	22	Sample X118	4095	4080	4070	4071	4098	4090				-0.0304237	-0.0319745	-0.0330069	-0.0329037	-0.0301133	-0.030941		E	22	-0.00144989	0.00627845	0.000206323	0.000515778	0.00906226	0.00070081	0
E	23	Sample X119	5135	5109	5111	5163	5172	5212				0.0842256	0.0811771	0.0814112	0.0875198	0.0885811	0.0933127		E	23	0	0	0	0	0	0	0
E	24	Sample X120	4109	4019	4068	4066	4010	3993				-0.0289739	-0.038253	-0.0332132	-0.0334195	-0.0391755	-0.0409154		E	24	0	0	0	0	0	0	0
F	1	Sample X121	6829	6844	6619	6441	6365	6317				0.306871	0.30908	0.276433	0.251317	0.240779	0.23418		F	1	0.270369	0.280683	0.253765	0.231501	0.218661	-0.00344724	0
F	2	Sample X122	6047	5979	6059	5957	5845	5759				0.197844	0.188898	0.199431	0.186021	0.171504	0.160501		F	2	0.236097	0.221492	0.226434	0.221192	0.207395	-0.0019135	0
F	3	Sample X123	5649	5555	5471	5473	5519	5520				0.146606	0.134889	0.124538	0.124783	0.130439	0.130562		F	3	0.110104	0.106491	0.10187	0.104966	0.10832	-0.000118914	0
F	4	Sample X124	5175	5182	5201	5187	5166	5104				0.0889352	0.0897618	0.0920091	0.0903527	0.0878735	0.080592		F	4	0.127188	0.122356	0.119011	0.125524	0.123764	-0.000228248	0
F	5	Sample X125	5776	5820	5623	5712	5840	5889				0.162666	0.168292	0.143351	0.154539	0.170861	0.177181		F	5	0.126164	0.139895	0.120683	0.134723	0.148742	0.00150522	0
F	6	Sample X126	5299	5473	5779	5979	6188	6353				0.103687	0.124783	0.163048	0.188898	0.216655	0.239125		F	6	0.14194	0.157377	0.190051	0.224069	0.252546	0.00737373	0
F	7	Sample X127	5383	5483	5516	5397	5355	5383				0.113813	0.126009	0.130069	0.115511	0.110425	0.113813		F	7	0.0773104	0.0976122	0.107401	0.0956942	0.0883066	0.00073308	0
F	8	Sample X128	5162	5272	5223	4907	4875	4901				0.087402	0.100455	0.0946181	0.0578267	0.0541812	0.0571421		F	8	0.125655	0.133049	0.12162	0.0929976	0.0900722	-0.00237219	0
F	9	Sample X129	5257	5378	5364	5203	5177	5251				0.0986644	0.113207	0.111513	0.092246	0.0891713	0.0979491		F	9	0.0621622	0.0848096	0.088845	0.0724295	0.0670526	0.000326027	0
F	10	Sample X130	5061	5070	4909	4913	4935	4966				0.075575	0.0766229	0.0580551	0.0585119	0.0610285	0.0645863		F	10	0.113828	0.109217	0.0850574	0.0936828	0.0969195	-0.00112724	0
F	11	Sample X131	5393	5476	5563	5500	5417	5387				0.115025	0.125151	0.13588	0.128099	0.117942	0.114297		F	11	0.0785231	0.0967533	0.113213	0.108282	0.0958233	0.00115335	0
F	12	Sample X132	4680	4635	4503	4514	4541	4530				0.0322741	0.0272926	0.0128363	0.0140322	0.0169743	0.0157745		F	12	0.0705271	0.0598867	0.0398386	0.049203	0.0528653	-0.00117746	0
F	13	Sample X133	5828	5812	5863	5850	5692	5654				0.169319	0.167267	0.173822	0.172147	0.152014	0.147233		F	13	0.132817	0.13887	0.151155	0.152331	0.129895	-0.000194767	0
F	14	Sample X134	4598	4610	4683	4671	4677	4572				0.023217	0.0245368	0.0326072	0.0312756	0.0319412	0.0203641		F	14	0.06147	0.0571309	0.0596095	0.0664465	0.0678322	0.000424143	0
F	15	Sample X135	5318	5331	5393	5299	5068	4972				0.105968	0.107531	0.115025	0.103687	0.0763899	0.0652764		F	15	0.0694655	0.0791343	0.0923575	0.0838703	0.0542712	-0.00101295	0
F	16	Sample X136	4180	4179	4197	4280	4296	4290				-0.0215838	-0.0216883	-0.0198051	-0.0110691	-0.00937511	-0.0100107		F	16	0.0166692	0.0109058	0.00719721	0.0241018	0.0265159	0.000656445	0
F	17	Sample X137	4247	4193	4200	4183	4209	4215				-0.0145528	-0.0202239	-0.0194908	-0.0212702	-0.0185474	-0.0179179		F	17	-0.051055	-0.0486212	-0.0421585	-0.0410866	-0.0406661	0.000692592	0
F	18	Sample X138	4178	4290	4342	4378	4363	4359				-0.0217928	-0.0100107	-0.0044868	-0.000642356	-0.00224622	-0.00267344		F	18	0.0164602	0.0225834	0.0225155	0.0345285	0.0336448	0.00114564	0
F	19	Sample X139	5403	5234	5230	5198	5227	5265				0.116239	0.0959253	0.0954497	0.0916539	0.0950932	0.099619		F	19	0.0797373	0.067528	0.072782	0.0718375	0.0729745	-0.000450851	0
F	20	Sample X140	4376	4322	4409	4405	4412	4407				-0.000856372	-0.00661546	0.00268147	0.00225189	0.00300379	0.00246665		F	20	0.0373966	0.0259786	0.0296838	0.0374228	0.0388948	9.98775e-05	0
F	21	Sample X141	4532	4396	4482	4501	4529	4499				0.0159925	0.0012861	0.0105577	0.012619	0.0156655	0.0124018		F	21	-0.0205097	-0.0271111	-0.01211	-0.00719746	-0.00645321	0.000937098	0
F	22	Sample X142	3864	3850	3914	3855	3848	3896				-0.0540059	-0.0554148	-0.0489555	-0.0549119	-0.0556159	-0.050777		F	22	-0.0157529	-0.0228207	-0.0219532	-0.019741	-0.0197249	-0.000264796	0
F	23	Sample X143	4718	4645	4593	4567	4588	4543				0.0365022	0.0283972	0.0226677	0.0198165	0.0221187	0.0171926		F	23	0	0	0	0	0	0	0
F	24	Sample X144	4019	4074	4128	4049	4042	4039				-0.038253	-0.0325941	-0.0270023	-0.0351709	-0.035891	-0.0361994		F	24	0	0	0	0	0	0	0
G	1	Sample X145	9713	9960	10146	10497	10973	11321				0.838972	0.897409	0.943161	1.03389	1.16703	1.27262		G	1	0.815535	0.87529	0.919394	1.01221	1.14535	0.0219879	0
G	2	Sample X146	11538	13379	14570	15680	16617	17248				1.34236	2.09281	2.80543	3.75412	4.92465	6.03793		G	2	1.36384	2.12044	2.83171	3.7806	4.94978	0.239063	0
G	3	Sample X147	8052	8074	8691	8945	9418	9836				0.503683	0.507563	0.622006	0.672508	0.772431	0.86775		G	3	0.480246	0.485445	0.598239	0.650829	0.750751	0.0180337	0
G	4	Sample X148	8266	9886	11289	12804	13096	13955				0.541992	0.87963	1.26259	1.82244	1.95486	2.40759		G	4	0.563471	0.907255	1.28887	1.84893	1.97999	0.0944347	0
G	5	Sample X149	6558	7075	7549	8146	8635	9016				0.267756	0.343692	0.418421	0.520354	0.61115	0.687006		G	5	0.244319	0.321573	0.394655	0.498674	0.58947	0.02301	0
G	6	Sample X150	6815	7714	8486	9117	9767	10374				0.304814	0.445681	0.582735	0.707927	0.851529	1.00142		G	6	0.326293	0.473307	0.60901	0.73441	0.87666	0.0366911	0
G	7	Sample X151	6240	6651	7281	7765	8100	8502				0.223682	0.281014	0.375537	0.454244	0.512166	0.585754		G	7	0.200246	0.258895	0.35177	0.432564	0.490486	0.0193494	0
G	8	Sample X152	5944	6593	7391	7362	7861	8775				0.184325	0.272725	0.392935	0.388321	0.470542	0.638476		G	8	0.205804	0.300351	0.41921	0.414804	0.495672	0.0193245	0
G	9	Sample X153	6016	6450	7073	7489	7883	8336				0.193756	0.252572	0.343387	0.408673	0.47431	0.554803		G	9	0.170319	0.230454	0.31962	0.386993	0.45263	0.0188208	0
G	10	Sample X154	5641	5743	6041	6369	6537	6789				0.145603	0.158467	0.197052	0.241331	0.264786	0.301004		G	10	0.167082	0.186093	0.223326	0.267814	0.289917	0.00818894	0
G	11	Sample X155	6127	6111	6593	7004	7279	7563				0.208473	0.206338	0.272725	0.332932	0.375223	0.420708		G	11	0.185036	0.18422	0.248959	0.311253	0.353544	0.0112338	0
G	12	Sample X156	5233	5068	5026	5157	5272	5432				0.0958064	0.0763899	0.0715114	0.0868129	0.100455	0.11977		G	12	0.117286	0.104015	0.0977862	0.113296	0.125585	0.000553324	0
G	13	Sample X157	5539	5522	5829	6154	6386	6648				0.132908	0.130809	0.169447	0.212086	0.24368	0.280583		G	13	0.109472	0.10869	0.14568	0.190407	0.222	0.00750193	0
G	14	Sample X158	4791	4779	4812	4876	4970	5037				0.0446799	0.0433306	0.047046	0.0542949	0.0650463	0.0727866		G	14	0.0661591	0.0709559	0.0733208	0.0807776	0.0901768	0.00160117	0
G	15	Sample X159	5128	5097	5134	5363	5558	5691				0.0834039	0.0797734	0.0841082	0.111392	0.13526	0.151888		G	15	0.059967	0.0576547	0.0603415	0.0897121	0.113581	0.00357425	0
G	16	Sample X160	4512	4459	4480	4573	4637	4600				0.0138146	0.00806865	0.010341	0.0204737	0.0275134	0.0234369		G	16	0.0352939	0.035694	0.0366158	0.0469564	0.0526438	0.00115666	0
G	17	Sample X161	5609	5486	5535	5723	5819	5953				0.141602	0.126378	0.132414	0.155931	0.168164	0.185499		G	17	0.118166	0.104259	0.108647	0.134252	0.146484	0.00188792	0
G	18	Sample X162	4599	4625	4737	4732	4649	4650				0.023327	0.0261893	0.0386236	0.0380648	0.0288395	0.0289501		G	18	0.0448062	0.0538146	0.0648984	0.0645476	0.0539699	0.000610913	0
G	19	Sample X163	4858	4819	4892	4922	4995	5070				0.0522504	0.0478361	0.0561161	0.0595406	0.0679269	0.0766229		G	19	0.0288135	0.0257174	0.0323494	0.0378609	0.0462472	0.00116225	0
G	20	Sample X164	4133	3983	4007	4037	4016	4048				-0.0264827	-0.0419373	-0.0394828	-0.036405	-0.0385606	-0.0352738		G	20	-0.00500349	-0.0143119	-0.013208	-0.00992228	-0.0134302	-0.000561779	0
G	21	Sample X165	4749	4811	4782	4803	4792	4817				0.039966	0.0469332	0.0436677	0.0460312	0.0447924	0.0476103		G	21	0.0165291	0.0248145	0.019901	0.0243515	0.0231127	0.000438908	0
G	22	Sample X166	4336	4384	4359	4316	4295	4331				-0.00512593	0	-0.00267344	-0.00725306	-0.00948108	-0.00565819		G	22	0.0163533	0.0276254	0.0236014	0.0192297	0.0156494	-4.6931e-05	0
G	23	Sample X167	4600	4588	4603	4584	4584	4582				0.0234369	0.0221187	0.0237667	0.0216797	0.0216797	0.0214603		G	23	0	0	0	0	0	0	0
G	24	Sample X168	4181	4122	4135	4133	4146	4154				-0.0214793	-0.0276254	-0.0262748	-0.0264827	-0.0251304	-0.0242972		G	24	0	0	0	0	0	0	0
H	1	Sample X169	8797	8689	8554	8559	8614	8622				0.642827	0.621617	0.595619	0.596572	0.607104	0.608643		H	1	0.648592	0.627913	0.61154	0.613439	0.622078	-0.00176759	0
H	2	Sample X170	10199	12657	14460	15364	16257	16991				0.956485	1.75927	2.72882	3.44633	4.4208	5.54273		H	2	0.945711	1.74502	2.71989	3.43881	4.41424	0.231235	0
H	3	Sample X171	6760	6756	6744	6827	6807	6815				0.296771	0.296189	0.294443	0.306577	0.30364	0.304814		H	3	0.302536	0.302485	0.310365	0.323445	0.318615	0.00107191	0
H	4	Sample X172	7882	9620	10802	11970	12935	13727				0.474139	0.817624	1.11778	1.49114	1.88067	2.27707		H	4	0.463364	0.803374	1.10885	1.48361	1.87412	0.0940501	0
H	5	Sample X173	5922	6240	6053	6053	6122	6231				0.181461	0.223682	0.198637	0.198637	0.207806	0.222463		H	5	0.187226	0.229979	0.214559	0.215505	0.22278	0.00237025	0
H	6	Sample X174	6235	7408	8427	9223	9851	10486				0.223005	0.395649	0.571669	0.730268	0.871303	1.03096		H	6	0.21223	0.381399	0.562736	0.72274	0.864746	0.0435011	0
H	7	Sample X175	5678	5704	5720	5737	5753	5804				0.15025	0.153528	0.155551	0.157706	0.159738	0.166243		H	7	0.156014	0.159825	0.171473	0.174573	0.174712	0.00124648	0
H	8	Sample X176	5679	6273	6838	7359	7810	8272				0.150376	0.228168	0.308196	0.387845	0.461854	0.543085		H	8	0.139601	0.213918	0.299262	0.380317	0.455297	0.0210464	0
H	9	Sample X177	5526	5550	5336	5388	5481	5548				0.131302	0.134269	0.108134	0.114419	0.125764	0.134022		H	9	0.137067	0.140566	0.124055	0.131286	0.140738	0.000244738	0
H	10	Sample X178	5256	5545	5848	6091	6478	6768				0.0985451	0.133651	0.17189	0.203676	0.256487	0.297937		H	10	0.0877707	0.119401	0.162956	0.196148	0.24993	0.0108106	0
H	11	Sample X179	5338	5336	5105	5223	5234	5228				0.108375	0.108134	0.080709	0.0946181	0.0959253	0.095212		H	11	0.114139	0.11443	0.0966303	0.111486	0.110899	-0.000215987	0
H	12	Sample X180	4918	5047	5190	5304	5489	5659				0.0590832	0.0739475	0.0907074	0.104287	0.126746	0.147861		H	12	0.0483088	0.0596977	0.0817738	0.0967581	0.120189	0.00479203	0
H	13	Sample X181	5319	5374	5268	5252	5304	5317				0.106088	0.112722	0.0999772	0.0980682	0.104287	0.105848		H	13	0.111853	0.119019	0.115899	0.114936	0.119261	0.000493876	0
H	14	Sample X182	5088	5047	5107	5306	5404	5458				0.078722	0.0739475	0.080943	0.104527	0.116361	0.122946		H	14	0.0679476	0.0596977	0.0720094	0.096998	0.109804	0.00279043	0
H	15	Sample X183	4981	4980	4910	4847	4914	4969				0.0663127	0.0661975	0.0581693	0.0510031	0.0586261	0.0649313		H	15	0.0720773	0.072494	0.0740906	0.0678708	0.0736003	0.00010153	0
H	16	Sample X184	4845	4858	4898	5010	5089	5148				0.0507766	0.0522504	0.0568	0.0696596	0.0788388	0.0857536		H	16	0.0400021	0.0380006	0.0478664	0.0621312	0.0722818	0.00215198	0
H	17	Sample X185	5083	5007	4928	4981	5003	5063				0.0781385	0.0693128	0.060227	0.0663127	0.0688506	0.0758078		H	17	0.0839031	0.0756093	0.0761484	0.0831803	0.0838248	-5.22112e-06	0
H	18	Sample X186	4987	5096	5025	5102	5155	5202				0.0670042	0.0796565	0.0713955	0.080358	0.0865774	0.0921276		H	18	0.0562297	0.0654068	0.0624619	0.0728295	0.0800205	0.00158605	0
H	19	Sample X187	4839	4850	4826	4871	4892	4903				0.0500972	0.0513431	0.0486268	0.0537265	0.0561161	0.0573703		H	19	0.0558618	0.0576396	0.0645482	0.0705942	0.0710902	0.00101523	0
H	20	Sample X188	4491	4475	4479	4550	4632	4710				0.0115335	0.00979941	0.0102326	0.0179571	0.0269614	0.0356104		H	20	0.000759083	-0.00445036	0.00129901	0.0104286	0.0204045	0.00130969	0
H	21	Sample X189	4737	4673	4704	4717	4753	4775				0.0386236	0.0314974	0.0349422	0.0363907	0.0404139	0.0428812		H	21	0.0443882	0.0377939	0.0508636	0.0532583	0.055388	0.000733319	0
H	22	Sample X190	4699	4661	4593	4600	4584	4587				0.0343857	0.0301675	0.0226677	0.0234369	0.0216797	0.0220089		H	22	0.0236113	0.0159177	0.0137341	0.0159084	0.0151228	-0.000565901	0
H	23	Sample X191	4330	4325	4234	4225	4243	4273				-0.00576461	-0.00629648	-0.0159214	-0.0168676	-0.0149741	-0.0118092		H	23	0	0	0	0	0	0	0
H	24	Sample X192	4484	4516	4467	4454	4445	4438				0.0107744	0.0142498	0.00893361	0.00752847	0.00655697	0.00580208		H	24	0	0	0	0	0	0	0
I	1	Sample X193	8451	11039	13003	14382	15432	16437				0.576158	1.18649	1.91164	2.67603	3.50964	4.6629		I	1	0.58691	1.1965	1.9225	2.68794	3.5223	0.195692	0
I	2	Sample X194	9017	12583	15028	16463	17690	18719				0.687212	1.7283	3.1545	4.69944	7.06671	10.9725		I	2	0.713902	1.74768	3.17681	4.72737	7.0933	0.425293	0
I	3	Sample X195	8082	10215	11800	12996	14075	14994				0.508978	0.960533	1.43093	1.90843	2.47971	3.12677		I	3	0.519729	0.970544	1.44179	1.92035	2.49236	0.131509	0
I	4	Sample X196	7080	9733	11512	12822	13946	14937				0.344454	0.843609	1.33384	1.83034	2.40228	3.08098		I	4	0.371144	0.862995	1.35615	1.85827	2.42886	0.137181	0
I	5	Sample X197	7669	9464	10881	12090	13096	13995				0.43818	0.782584	1.14033	1.53501	1.95486	2.43135		I	5	0.448932	0.792595	1.15119	1.54692	1.96752	0.101239	0
I	6	Sample X198	6220	8504	10023	11300	12413	13324				0.220974	0.586132	0.912733	1.26603	1.65915	2.06521		I	6	0.247664	0.605518	0.935048	1.29397	1.68574	0.0958717	0
I	7	Sample X199	6637	8345	9802	11031	11940	12772				0.279007	0.55646	0.859732	1.18412	1.48035	1.8085		I	7	0.289759	0.566471	0.87059	1.19604	1.493	0.0802163	0
I	8	Sample X200	5736	7031	8015	8963	9850	10619				0.157579	0.337011	0.497187	0.676168	0.871066	1.06686		I	8	0.184269	0.356397	0.519503	0.704104	0.897653	0.0475589	0
I	9	Sample X201	6651	8292	9728	10926	11674	12302				0.281014	0.546734	0.842448	1.15333	1.38772	1.61546		I	9	0.291765	0.556745	0.853306	1.16525	1.40037	0.0739073	0
I	10	Sample X202	5696	6370	6815	7380	8017	8497				0.152518	0.241469	0.304814	0.391183	0.497538	0.58481		I	10	0.179209	0.260855	0.327129	0.41912	0.524124	0.0229944	0
I	11	Sample X203	5806	6918	7904	8680	9378	10059				0.166499	0.320045	0.477919	0.619866	0.763667	0.921568		I	11	0.17725	0.330055	0.488776	0.631781	0.776322	0.0399381	0
I	12	Sample X204	4616	5108	5299	5656	5923	6191				0.0251974	0.08106	0.103687	0.147484	0.181591	0.217059		I	12	0.051888	0.100446	0.126002	0.175421	0.208178	0.0104193	0
I	13	Sample X205	5485	6412	7245	7606	8103	8666				0.126255	0.247283	0.369903	0.427763	0.512698	0.617147		I	13	0.137007	0.257294	0.380761	0.439678	0.525352	0.0258897	0
I	14	Sample X206	4837	5016	5175	5282	5393	5509				0.0498708	0.0703536	0.0889352	0.101651	0.115025	0.129206		I	14	0.0765614	0.0897397	0.11125	0.129587	0.141612	0.0043367	0
I	15	Sample X207	5003	5780	6069	6508	6843	7169				0.0688506	0.163176	0.200756	0.260699	0.308933	0.358106		I	15	0.0796024	0.173187	0.211613	0.272614	0.321587	0.0161323	0
I	16	Sample X208	4208	4330	4357	4492	4478	4546				-0.0186523	-0.00576461	-0.00288697	0.011642	0.0101243	0.0175201		I	16	0.00803834	0.0136214	0.0194282	0.0395788	0.036711	0.00191151	0
I	17	Sample X209	4795	5101	5312	5514	5709	5895				0.0451301	0.0802411	0.105247	0.129822	0.15416	0.177958		I	17	0.0558818	0.0902518	0.116104	0.141737	0.166814	0.00739551	0
I	18	Sample X210	4185	4291	4240	4222	4271	4308				-0.021061	-0.00990483	-0.01529	-0.0171828	-0.0120206	-0.00810249		I	18	0.00562959	0.00948122	0.00702516	0.0107539	0.0145661	0.000595768	0
I	19	Sample X211	4560	4864	4937	5031	5129	5210				0.0190504	0.0529314	0.0612576	0.0720908	0.0835212	0.0930756		I	19	0.0298021	0.0629421	0.0721151	0.0840057	0.0961755	0.00442489	0
I	20	Sample X212	4204	4292	4298	4280	4207	4218				-0.0190716	-0.00979891	-0.00916313	-0.0110691	-0.0187571	-0.0176029		I	20	0.00761896	0.00958714	0.013152	0.0168676	0.00782955	1.40397e-05	0
I	21	Sample X213	4393	4446	4473	4549	4586	4680				0.000964401	0.00666486	0.00958288	0.0178478	0.0218992	0.0322741		I	21	0.0117161	0.0166756	0.0204404	0.0297627	0.0345535	0.00152249	0
I	22	Sample X214	4141	4175	4157	4115	4119	4105				-0.0256508	-0.0221062	-0.0239846	-0.0283517	-0.0279367	-0.0293884		I	22	0.0010398	-0.00272019	-0.00166941	-0.000414989	-0.00135007	-0.000159325	0
I	23	Sample X215	4283	4290	4282	4272	4265	4314				-0.0107517	-0.0100107	-0.0108575	-0.0119149	-0.0126543	-0.0074655		I	23	0	0	0	0	0	0	0
I	24	Sample X216	4131	4201	4173	4119	4132	4141				-0.0266906	-0.0193861	-0.0223151	-0.0279367	-0.0265867	-0.0256508		I	24	0	0	0	0	0	0	0
J	1	Sample X217	5142	5626	6065	6448	6883	7352				0.0850481	0.143726	0.200226	0.252293	0.314844	0.386735		J	1	0.0754652	0.134792	0.193993	0.248322	0.310227	0.0156508	0
J	2	Sample X218	5058	5395	5699	6025	6503	7001				0.075226	0.115268	0.152897	0.194941	0.259996	0.33248		J	2	0.0669412	0.108711	0.14828	0.192474	0.260103	0.0128774	0
J	3	Sample X219	4907	5451	5705	6023	6597	7281				0.0578267	0.122089	0.153655	0.194678	0.273295	0.375537		J	3	0.0482439	0.113156	0.147421	0.190706	0.268678	0.0146956	0
J	4	Sample X220	5458	5623	5932	6274	6413	6675				0.122946	0.143351	0.182762	0.228304	0.247422	0.284463		J	4	0.114661	0.136794	0.178145	0.225837	0.247529	0.0088579	0
J	5	Sample X221	5504	6104	6491	7035	7529	7970				0.128591	0.205406	0.25831	0.337617	0.415162	0.489336		J	5	0.119008	0.196472	0.252077	0.333645	0.410545	0.0194358	0
J	6	Sample X222	4736	5021	4981	5205	5330	5465				0.0385118	0.0709323	0.0663127	0.092483	0.107411	0.123802		J	6	0.030227	0.0643753	0.0616956	0.0900163	0.107518	0.00515275	0
J	7	Sample X223	4994	5503	5951	6403	6830	7266				0.0678115	0.128468	0.185238	0.246035	0.307018	0.373186		J	7	0.0582287	0.119534	0.179005	0.242063	0.302401	0.0162782	0
J	8	Sample X224	5164	5268	5220	5406	5447	5460				0.0876377	0.0999772	0.0942619	0.116604	0.121601	0.12319		J	8	0.0793529	0.0934202	0.0896448	0.114137	0.121708	0.00282365	0
J	9	Sample X225	5265	5730	6056	6384	6781	7177				0.099619	0.156818	0.199034	0.243404	0.299835	0.359342		J	9	0.0900361	0.147884	0.192801	0.239432	0.295218	0.0136788	0
J	10	Sample X226	5123	5058	5009	5059	5108	5162				0.0828174	0.075226	0.069544	0.0753424	0.08106	0.087402		J	10	0.0745326	0.0686691	0.0649269	0.0728757	0.0811671	0.000442304	0
J	11	Sample X227	4753	5070	5414	5745	6061	6357				0.0404139	0.0766229	0.117577	0.158721	0.199696	0.239676		J	11	0.030831	0.0676893	0.111344	0.15475	0.195079	0.0109499	0
J	12	Sample X228	4570	4578	4734	4750	4700	4704				0.020145	0.0210217	0.0382883	0.0400779	0.034497	0.0349422		J	12	0.0118602	0.0144647	0.0336712	0.0376113	0.0346041	0.00151626	0
J	13	Sample X229	5049	5277	5496	5681	5899	6102				0.0741798	0.101053	0.127607	0.150628	0.178476	0.205139		J	13	0.0645969	0.0921191	0.121373	0.146656	0.173859	0.00728416	0
J	14	Sample X230	4785	4702	4893	4809	4792	4777				0.044005	0.0347196	0.05623	0.0467076	0.0447924	0.0431059		J	14	0.0357202	0.0281626	0.0516129	0.044241	0.0448995	0.000611956	0
J	15	Sample X231	4517	4650	4784	4919	5048	5214				0.0143586	0.0289501	0.0438925	0.0591976	0.0740636	0.0935499		J	15	0.00477571	0.0200165	0.0376592	0.0552261	0.0694465	0.00431139	0
J	16	Sample X232	4396	4406	4490	4534	4552	4564				0.0012861	0.00235927	0.011425	0.0162106	0.0181756	0.0194881		J	16	-0.00699871	-0.0041977	0.00680791	0.0137439	0.0182827	0.00168543	0
J	17	Sample X233	4757	4827	4901	4998	5090	5174				0.040862	0.0487398	0.0571421	0.0682732	0.0789556	0.0888172		J	17	0.0312791	0.0398062	0.0509087	0.0643018	0.0743385	0.00287062	0
J	18	Sample X234	4975	5118	5042	5004	5026	5024				0.0656217	0.0822312	0.0733669	0.0689662	0.0715114	0.0712797		J	18	0.0573369	0.0756743	0.0687497	0.0664995	0.0716185	0.000952104	0
J	19	Sample X235	4640	4677	4703	4707	4760	4760				0.0278447	0.0319412	0.0348309	0.0352762	0.0411982	0.0411982		J	19	0.0182619	0.0230076	0.0285975	0.0313048	0.0365811	0.00122128	0
J	20	Sample X236	4337	4347	4324	4305	4266	4265				-0.00501944	-0.00395384	-0.00640282	-0.00842082	-0.0125487	-0.0126543		J	20	-0.0133043	-0.0105108	-0.0110199	-0.0108875	-0.0124416	5.75095e-05	0
J	21	Sample X237	4441	4477	4425	4469	4496	4493				0.00612553	0.010016	0.00440184	0.00914998	0.0120761	0.0117505		J	21	-0.00345735	0.00108238	-0.00183153	0.00517854	0.00745899	0.000727756	0
J	22	Sample X238	4636	4648	4614	4626	4602	4588				0.027403	0.0287289	0.0249772	0.0262995	0.0236568	0.0221187		J	22	0.0191182	0.0221719	0.0203601	0.0238329	0.0237638	0.000309712	0
J	23	Sample X239	4473	4467	4442	4421	4427	4409				0.00958288	0.00893361	0.00623337	0.00397144	0.00461712	0.00268147		J	23	0	0	0	0	0	0	0
J	24	Sample X240	4461	4445	4427	4407	4383	4394				0.00828481	0.00655697	0.00461712	0.00246665	-0.000107091	0.00107162		J	24	0	0	0	0	0	0	0
K	1	Sample X241	5009	5207	5454	5751	6048	6391				0.069544	0.09272	0.122456	0.159483	0.197976	0.244372		K	1	0.0898726	0.106008	0.131937	0.166205	0.202676	0.00752025	0
K	2	Sample X242	6227	6851	7371	7847	8374	8914				0.221921	0.310112	0.389751	0.46815	0.561817	0.666231		K	2	0.176791	0.284033	0.363562	0.440526	0.535738	0.0239298	0
K	3	Sample X243	4623	4834	5158	5438	5727	5946				0.0259688	0.0495314	0.0869307	0.120502	0.156438	0.184586		K	3	0.0462974	0.0628189	0.0964118	0.127223	0.161138	0.00765603	0
K	4	Sample X244	5604	5834	6102	6556	6888	7218				0.140979	0.170089	0.205139	0.267473	0.315586	0.365697		K	4	0.0958487	0.14401	0.17895	0.239849	0.289507	0.0129105	0
K	5	Sample X245	4828	5014	5112	5477	5722	6000				0.0488529	0.0701222	0.0815283	0.125273	0.155805	0.191652		K	5	0.0691815	0.0834098	0.0910094	0.131995	0.160505	0.00608821	0
K	6	Sample X246	5076	5314	5457	5663	5843	6079				0.0773221	0.105487	0.122823	0.148363	0.171246	0.202082		K	6	0.032192	0.0794081	0.0966339	0.12074	0.145167	0.00753169	0
K	7	Sample X247	5176	5490	5523	5834	6096	6465				0.0890532	0.126869	0.130932	0.170089	0.204341	0.254668		K	7	0.109382	0.140157	0.140413	0.176811	0.209041	0.00664394	0
K	8	Sample X248	5016	5079	5269	5391	5483	5555				0.0703536	0.0776719	0.100097	0.114783	0.126009	0.134889		K	8	0.0252235	0.0515928	0.0739074	0.0871587	0.0999304	0.00498046	0
K	9	Sample X249	4755	4915	5128	5398	5620	5769				0.0406379	0.0587404	0.0834039	0.115632	0.142976	0.161774		K	9	0.0609665	0.072028	0.092885	0.122354	0.147676	0.00578062	0
K	10	Sample X250	5308	5549	5489	5498	5523	5571				0.104767	0.134146	0.126746	0.127853	0.130932	0.136873		K	10	0.0596365	0.108067	0.100557	0.100229	0.104853	0.00301445	0
K	11	Sample X251	4380	4606	4679	4939	5085	5213				-0.000428289	0.0240967	0.0321631	0.0614868	0.0783719	0.0934313		K	11	0.0199003	0.0373843	0.0416442	0.0682085	0.0830718	0.00421143	0
K	12	Sample X252	4781	5024	5070	5014	5011	5056				0.0435553	0.0712797	0.0766229	0.0701222	0.0697752	0.0749934		K	12	-0.00157479	0.0452007	0.0504336	0.0424984	0.0436962	0.00301807	0
K	13	Sample X253	4514	4644	4721	4835	5014	5129				0.0140322	0.0282867	0.0368368	0.0496445	0.0701222	0.0835212		K	13	0.0343608	0.0415743	0.0463179	0.0563662	0.0748221	0.00269742	0
K	14	Sample X254	4869	5085	5096	5131	5151	5147				0.0534993	0.0783719	0.0796565	0.083756	0.0861066	0.085636		K	14	0.00836915	0.0522928	0.0534673	0.0561321	0.0600276	0.0034439	0
K	15	Sample X255	4202	4334	4421	4501	4523	4554				-0.0192813	-0.00533888	0.00397144	0.012619	0.0150118	0.0183943		K	15	0.00104734	0.0079487	0.0134525	0.0193408	0.0197117	0.00124429	0
K	16	Sample X256	4660	4704	4771	4817	4847	4882				0.0300567	0.0349422	0.0424321	0.0476103	0.0510031	0.0549774		K	16	-0.0150734	0.00886317	0.0162429	0.0199864	0.0249241	0.0026665	0
K	17	Sample X257	4399	4446	4457	4507	4563	4591				0.00160791	0.00666486	0.00785254	0.013271	0.0193786	0.0224481		K	17	0.0219365	0.0199524	0.0173336	0.0199927	0.0240785	0.000142801	0
K	18	Sample X258	4660	4706	4751	4834	4853	4866				0.0300567	0.0351649	0.0401899	0.0495314	0.0516832	0.0531585		K	18	-0.0150734	0.00908587	0.0140006	0.0219075	0.0256042	0.00271184	0
K	19	Sample X259	4206	4263	4237	4256	4286	4308				-0.018862	-0.0128654	-0.0156057	-0.013604	-0.0104342	-0.00810249		K	19	0.00146663	0.000422138	-0.00612466	-0.00688229	-0.00573434	-0.000480065	0
K	20	Sample X260	4793	4891	4927	4962	4996	5072				0.044905	0.0560022	0.0601126	0.0641264	0.0680424	0.0768559		K	20	-0.000225136	0.0299231	0.0339233	0.0365026	0.0419633	0.00281256	0
K	21	Sample X261	4109	4081	4103	4143	4179	4201				-0.0289739	-0.0318712	-0.0295955	-0.0254427	-0.0216883	-0.0193861		K	21	-0.00864524	-0.0185837	-0.0201144	-0.0187209	-0.0169884	-0.000556211	0
K	22	Sample X262	5022	4960	4942	5039	5055	5034				0.0710481	0.0638966	0.0618307	0.0730187	0.0748772	0.0724387		K	22	0.025918	0.0378176	0.0356414	0.0453948	0.0487981	0.00152534	0
K	23	Sample X263	4192	4259	4295	4321	4340	4383				-0.0203286	-0.0132876	-0.00948108	-0.00672176	-0.0046999	-0.000107091		K	23	0	0	0	0	0	0	0
K	24	Sample X264	4795	4624	4625	4638	4624	4674				0.0451301	0.026079	0.0261893	0.0276238	0.026079	0.0316084		K	24	0	0	0	0	0	0	0
L	1	Sample X265	5143	5676	6201	6669	7218	7736				0.0851656	0.149998	0.218407	0.283599	0.365697	0.449367		L	1	0.17806	0.244239	0.30667	0.372152	0.455313	0.0184835	0
L	2	Sample X266	10177	13440	15323	16706	17666	18805				0.950938	2.12389	3.40889	5.06209	7.00395	11.461		L	2	0.910077	2.0955	3.386	5.03766	6.97831	0.404549	0
L	3	Sample X267	4554	5002	5513	6156	6716	7060				0.0183943	0.0687351	0.129699	0.212354	0.290382	0.341409		L	3	0.111289	0.162976	0.217962	0.300907	0.379998	0.0179139	0
L	4	Sample X268	8532	11466	13448	15087	16056	16780				0.591435	1.31887	2.12801	3.20336	4.17108	5.18072		L	4	0.550573	1.29047	2.10512	3.17894	4.14544	0.239658	0
L	5	Sample X269	5107	5726	6039	6688	7080	7409				0.080943	0.156311	0.196788	0.286336	0.344454	0.395809		L	5	0.173838	0.250552	0.28505	0.374888	0.43407	0.0173488	0
L	6	Sample X270	7096	9472	11162	12529	13695	14591				0.346895	0.784358	1.22345	1.70603	2.2594	2.82036		L	6	0.306033	0.755961	1.20057	1.68161	2.23376	0.128515	0
L	7	Sample X271	5119	5956	5687	6100	6531	7058				0.0823484	0.185891	0.151383	0.204873	0.263939	0.341106		L	7	0.175243	0.280132	0.239646	0.293426	0.353555	0.0118875	0
L	8	Sample X272	6124	7468	8865	10080	11012	11766				0.208073	0.405282	0.656375	0.926749	1.1785	1.41916		L	8	0.167211	0.376884	0.633488	0.902322	1.15286	0.0657102	0
L	9	Sample X273	5054	5543	5795	5887	6322	6947				0.0747609	0.133403	0.165091	0.176923	0.234865	0.324373		L	9	0.167656	0.227644	0.253354	0.265475	0.324481	0.0104551	0
L	10	Sample X274	5650	6417	7225	8059	8765	9317				0.146731	0.247978	0.366786	0.504916	0.636504	0.750418		L	10	0.105869	0.21958	0.343899	0.48049	0.610866	0.0336664	0
L	11	Sample X275	4436	4751	5092	5262	5441	5793				0.00558652	0.0401899	0.0791892	0.0992609	0.120868	0.164836		L	11	0.0984812	0.134431	0.167452	0.187814	0.210484	0.00746684	0
L	12	Sample X276	4994	5585	5873	6195	6575	6915				0.0678115	0.138613	0.175113	0.217598	0.270167	0.319598		L	12	0.0269496	0.110216	0.152226	0.193171	0.244529	0.0145053	0
L	13	Sample X277	4248	4471	4774	4978	5100	5325				-0.0144474	0.00936641	0.0427689	0.0659671	0.0801241	0.106809		L	13	0.0784473	0.103607	0.131031	0.15452	0.16974	0.0060862	0
L	14	Sample X278	4900	5270	5394	5602	5832	5997				0.057028	0.100216	0.115147	0.140729	0.169832	0.191258		L	14	0.0161661	0.0718188	0.0922592	0.116303	0.144194	0.00853522	0
L	15	Sample X279	3737	3904	4053	4269	4412	4497				-0.066703	-0.0499679	-0.0347591	-0.0122319	0.00300379	0.0121847		L	15	0.0261918	0.0442731	0.0535034	0.0763209	0.09262	0.00442855	0
L	16	Sample X280	4715	4792	4870	4914	4996	5088				0.0361677	0.0447924	0.0536129	0.0586261	0.0680424	0.078722		L	16	-0.00469431	0.0163952	0.0307255	0.0341994	0.0424042	0.0031399	0
L	17	Sample X281	3818	4007	4162	4176	4217	4252				-0.0586265	-0.0394828	-0.0234632	-0.0220018	-0.0177079	-0.0140258		L	17	0.0342682	0.0547582	0.0647993	0.066551	0.0719083	0.00250934	0
L	18	Sample X282	4948	4914	4911	4952	4983	5008				0.0625188	0.0586261	0.0582835	0.0629778	0.0665431	0.0694284		L	18	0.0216568	0.0302289	0.0353961	0.0385511	0.040905	0.00128321	0
L	19	Sample X283	3688	3734	3746	3769	3809	3904				-0.0715522	-0.0670006	-0.0658093	-0.0635213	-0.0595276	-0.0499679		L	19	0.0213426	0.0272404	0.0224532	0.0250315	0.0300886	0.000583068	0
L	20	Sample X284	4503	4487	4523	4513	4554	4564				0.0128363	0.0110997	0.0150118	0.0139234	0.0183943	0.0194881		L	20	-0.0280257	-0.0172976	-0.0078756	-0.0105034	-0.00724387	0.00138545	0
L	21	Sample X285	3880	3787	3811	3825	3857	3882				-0.052393	-0.0617264	-0.0593274	-0.0579249	-0.0547107	-0.0521912		L	21	0.0405017	0.0325146	0.0289351	0.0306278	0.0349055	-0.00037308	0
L	22	Sample X286	4319	4293	4291	4293	4275	4258				-0.00693432	-0.00969298	-0.00990483	-0.00969298	-0.0115978	-0.0133931		L	22	-0.0477963	-0.0380902	-0.0327922	-0.0341198	-0.0372359	0.000704023	0
L	23	Sample X287	3469	3455	3517	3514	3503	3489				-0.0928947	-0.094241	-0.0882625	-0.0885528	-0.0896162	-0.0909677		L	23	0	0	0	0	0	0	0
L	24	Sample X288	4757	4645	4595	4609	4620	4586				0.040862	0.0283972	0.0228874	0.0244268	0.0256381	0.0218992		L	24	0	0	0	0	0	0	0
M	1	Sample X289	5708	7118	8306	9268	10130	10876				0.154034	0.350261	0.549295	0.739874	0.939164	1.13889		M	1	0.231291	0.424277	0.629293	0.82075	1.01984	0.0525703	0
M	2	Sample X290	8196	10745	12515	13854	15020	15907				0.529321	1.10173	1.70031	2.34875	3.14795	3.99855		M	2	0.511145	1.09904	1.69644	2.337	3.13293	0.174786	0
M	3	Sample X291	5436	6765	7900	8942	9971	9825				0.120257	0.2975	0.477231	0.671899	0.900072	0.865151		M	3	0.197514	0.371516	0.557228	0.752776	0.980753	0.0522159	0
M	4	Sample X292	6566	8569	10254	11516	12485	13194				0.26889	0.59848	0.97045	1.33515	1.6881	2.00151		M	4	0.250714	0.595798	0.966586	1.3234	1.67309	0.0948251	0
M	5	Sample X293	5798	7016	7848	8823	9572	10220				0.165475	0.334743	0.468321	0.647989	0.806741	0.9618		M	5	0.242732	0.408759	0.548318	0.728866	0.887422	0.0429793	0
M	6	Sample X294	5319	6447	7591	8537	9270	9940				0.106088	0.252154	0.425297	0.592385	0.740303	0.89258		M	6	0.0879123	0.249472	0.421433	0.580634	0.725291	0.0424919	0
M	7	Sample X295	5196	6383	6929	7742	8515	9178				0.0914172	0.243265	0.321684	0.450374	0.588213	0.720735		M	7	0.168674	0.317281	0.401681	0.53125	0.668894	0.033348	0
M	8	Sample X296	5275	5922	6568	7120	7678	8200				0.100814	0.181461	0.269174	0.350568	0.439676	0.530041		M	8	0.0826379	0.17878	0.26531	0.338817	0.424664	0.0228018	0
M	9	Sample X297	5189	6067	6748	7390	8248	8903				0.0905891	0.200491	0.295025	0.392776	0.538721	0.664012		M	9	0.167846	0.274507	0.375022	0.473652	0.619401	0.0301037	0
M	10	Sample X298	4882	5249	5706	6085	6444	6739				0.0549774	0.0977107	0.153781	0.202879	0.251735	0.293717		M	10	0.0368018	0.0950293	0.149917	0.191128	0.236724	0.0133281	0
M	11	Sample X299	4739	5369	6085	6671	7137	7702				0.0388472	0.112117	0.202879	0.283887	0.353177	0.443676		M	11	0.116104	0.186133	0.282876	0.364763	0.433858	0.0211836	0
M	12	Sample X300	4565	4781	4997	5130	5280	5398				0.0195975	0.0435553	0.0681578	0.0836386	0.101411	0.115632		M	12	0.00142189	0.0408738	0.0642939	0.0718881	0.0863997	0.00566518	0
M	13	Sample X301	4751	5352	5812	6351	6892	7331				0.0401899	0.110063	0.167267	0.23885	0.316179	0.383411		M	13	0.117447	0.184079	0.247264	0.319726	0.39686	0.0186276	0
M	14	Sample X302	4737	4918	5001	5080	5147	5186				0.0386236	0.0590832	0.0686196	0.0777885	0.085636	0.0902345		M	14	0.0204479	0.0564018	0.0647558	0.066038	0.0706242	0.00334509	0
M	15	Sample X303	4105	4440	4785	5060	5383	5652				-0.0293884	0.0060177	0.044005	0.0754587	0.113813	0.146982		M	15	0.0478684	0.0800334	0.124002	0.156335	0.194493	0.009775	0
M	16	Sample X304	4370	4450	4512	4516	4592	4643				-0.00149811	0.00709656	0.0138146	0.0142498	0.0225579	0.0281762		M	16	-0.0196738	0.00441509	0.00995075	0.00249926	0.00754607	0.00181466	0
M	17	Sample X305	3414	3675	3819	3943	4120	4288				-0.0981715	-0.0728341	-0.0585263	-0.0460127	-0.027833	-0.0102225		M	17	-0.0209147	0.00118162	0.0214708	0.0348634	0.0528479	0.00491751	0
M	18	Sample X306	4372	4459	4538	4590	4623	4620				-0.00128425	0.00806865	0.0166469	0.0223383	0.0259688	0.0256381		M	18	-0.0194599	0.00538718	0.012783	0.0105877	0.010957	0.00202779	0
M	19	Sample X307	3947	4032	4134	4228	4328	4425				-0.045606	-0.0369187	-0.0263788	-0.0165523	-0.0059774	0.00440184		M	19	0.0316508	0.037097	0.0536183	0.0643238	0.0747035	0.00287018	0
M	20	Sample X308	4624	4587	4581	4608	4626	4656				0.026079	0.0220089	0.0213506	0.0243167	0.0262995	0.0296139		M	20	0.00790337	0.0193275	0.0174868	0.0125662	0.0112877	0.000225625	0
M	21	Sample X309	3749	3772	3774	3811	3862	3899				-0.0655112	-0.0632224	-0.0630231	-0.0593274	-0.0542073	-0.0504737		M	21	0.0117455	0.0107933	0.016974	0.0215487	0.0264735	0.000981864	0
M	22	Sample X310	4638	4690	4717	4741	4777	4772				0.0276238	0.0333849	0.0363907	0.0390708	0.0431059	0.0425444		M	22	0.00944819	0.0307034	0.0325268	0.0273203	0.0280941	0.00124306	0
M	23	Sample X311	3630	3663	3602	3593	3595	3629				-0.0772568	-0.0740157	-0.0799971	-0.0808761	-0.0806809	-0.0773548		M	23	0	0	0	0	0	0	0
M	24	Sample X312	4552	4409	4420	4493	4523	4527				0.0181756	0.00268147	0.00386387	0.0117505	0.0150118	0.0154475		M	24	0	0	0	0	0	0	0
N	1	Sample X313	4419	5298	6084	6810	7523	8185				0.00375631	0.103567	0.202746	0.30408	0.414187	0.527342		N	1	0.104601	0.207457	0.308819	0.410248	0.518172	0.0275714	0
N	2	Sample X314	7676	9945	11688	13112	14285	15068				0.439344	0.893786	1.39246	1.9624	2.61207	3.18752		N	2	0.417664	0.883336	1.38147	1.95021	2.59989	0.145482	0
N	3	Sample X315	4358	5249	5834	6800	7646	8137				-0.00278021	0.0977107	0.170089	0.302615	0.434366	0.518747		N	3	0.098065	0.201601	0.276162	0.408782	0.538351	0.0293524	0
N	4	Sample X316	6577	8469	10013	11368	12316	13112				0.270451	0.579536	0.910289	1.28746	1.62091	1.9624		N	4	0.248771	0.569087	0.899297	1.27527	1.60872	0.0906634	0
N	5	Sample X317	4744	5528	6332	7035	7548	8030				0.0394064	0.131549	0.236238	0.337617	0.418258	0.499816		N	5	0.140252	0.23544	0.34231	0.443784	0.522244	0.0254661	0
N	6	Sample X318	5489	6770	7892	8859	9665	10394				0.126746	0.298229	0.475855	0.655173	0.82791	1.00665		N	6	0.105067	0.28778	0.464864	0.642989	0.815725	0.0473773	0
N	7	Sample X319	4570	5821	5818	6679	7369	7883				0.020145	0.168421	0.168036	0.285039	0.389433	0.47431		N	7	0.12099	0.272311	0.274108	0.391206	0.493419	0.0248286	0
N	8	Sample X320	5276	5904	6577	7328	8070	8693				0.100933	0.179125	0.270451	0.382937	0.506857	0.622396		N	8	0.0792534	0.168675	0.25946	0.370752	0.494672	0.0276946	0
N	9	Sample X321	4655	5297	6151	6624	7230	7850				0.0295032	0.103447	0.211684	0.277147	0.367565	0.468662		N	9	0.130348	0.207338	0.317757	0.383314	0.47155	0.0227468	0
N	10	Sample X322	5056	5514	5950	6425	6876	7226				0.0749934	0.129822	0.185108	0.24909	0.313807	0.366942		N	10	0.0533137	0.119373	0.174116	0.236905	0.301623	0.0165539	0
N	11	Sample X323	4084	4685	5100	5624	6229	6599				-0.0315613	0.0328293	0.0801241	0.143476	0.222192	0.27358		N	11	0.0692839	0.13672	0.186197	0.249643	0.326177	0.0171262	0
N	12	Sample X324	4425	4679	4956	5242	5426	5592				0.00440184	0.0321631	0.0634371	0.0968771	0.119038	0.139484		N	12	-0.0172779	0.0217138	0.0524458	0.0846924	0.106853	0.00827542	0
N	13	Sample X325	4156	4663	5068	5333	5792	6143				-0.0240888	0.030389	0.0763899	0.107772	0.164708	0.210613		N	13	0.0767564	0.134279	0.182462	0.21394	0.268694	0.0127958	0
N	14	Sample X326	4572	4774	4912	5050	5195	5244				0.0203641	0.0427689	0.0583977	0.074296	0.0912989	0.0971152		N	14	-0.00131562	0.0323196	0.0474064	0.0621113	0.0791142	0.00536199	0
N	15	Sample X327	3684	3999	4223	4499	4768	5026				-0.0719468	-0.0403017	-0.0170778	0.0124018	0.0420954	0.0715114		N	15	0.0288984	0.0635888	0.0889947	0.118569	0.146081	0.00781217	0
N	16	Sample X328	4663	4775	4874	4962	5006	5054				0.030389	0.0428812	0.0540675	0.0641264	0.0691973	0.0747609		N	16	0.00870928	0.0324319	0.0430763	0.0519418	0.0570126	0.00322022	0
N	17	Sample X329	3607	3781	3925	4097	4284	4447				-0.0795084	-0.0623251	-0.0478404	-0.0302168	-0.0106459	0.00677277		N	17	0.0213367	0.0415654	0.0582321	0.0759505	0.0933396	0.00480019	0
N	18	Sample X330	4509	4592	4682	4758	4846	4894				0.0134884	0.0225579	0.0324962	0.040974	0.0508898	0.056344		N	18	-0.00819133	0.0121086	0.0215049	0.0287894	0.0387052	0.00312643	0
N	19	Sample X331	3620	3654	3749	3812	3904	4007				-0.0782365	-0.0749008	-0.0655112	-0.0592273	-0.0499679	-0.0394828		N	19	0.0226087	0.0289896	0.0405613	0.0469399	0.0540176	0.00209392	0
N	20	Sample X332	4710	4792	4812	4868	4882	4906				0.0356104	0.0447924	0.047046	0.0533857	0.0549774	0.0577126		N	20	0.0139307	0.0343431	0.0360548	0.041201	0.0427928	0.00192414	0
N	21	Sample X333	3596	3576	3632	3677	3750	3764				-0.0805832	-0.0825339	-0.0770607	-0.072637	-0.0654118	-0.0640192		N	21	0.020262	0.0213566	0.0290118	0.0335303	0.0385737	0.00122078	0
N	22	Sample X334	4379	4414	4391	4384	4408	4413				-0.000535329	0.00321873	0.00075	0	0.00257406	0.00311125		N	22	-0.0222151	-0.00723058	-0.0102412	-0.0121847	-0.00961061	0.000840296	0
N	23	Sample X335	3386	3354	3331	3330	3353	3356				-0.100845	-0.10389	-0.106073	-0.106167	-0.103985	-0.1037		N	23	0	0	0	0	0	0	0
N	24	Sample X336	4584	4481	4486	4497	4497	4487				0.0216797	0.0104493	0.0109912	0.0121847	0.0121847	0.0110997		N	24	0	0	0	0	0	0	0
O	1	Sample X337	4045	4993	5709	6358	6960	7354				-0.0355824	0.0676962	0.15416	0.239814	0.326319	0.387052		O	1	0.116564	0.222169	0.306934	0.391512	0.476222	0.0239772	0
O	2	Sample X338	7841	10829	12635	13921	14511	15147				0.467127	1.12545	1.75	2.38759	2.76402	3.25406		O	2	0.465626	1.14985	1.7795	2.41335	2.78445	0.154589	0
O	3	Sample X339	4102	4934	5644	6370	6961	7427				-0.0296991	0.0609139	0.145979	0.241469	0.326469	0.39869		O	3	0.122447	0.215387	0.298752	0.393167	0.476371	0.023595	0
O	4	Sample X340	6816	8905	10508	11594	12531	13232				0.304961	0.664415	1.03683	1.36088	1.70685	2.01991		O	4	0.30346	0.688816	1.06633	1.38664	1.72729	0.0949218	0
O	5	Sample X341	4389	5236	6101	6822	7475	7955				0.00053565	0.0961631	0.205006	0.305842	0.406411	0.486731		O	5	0.152682	0.250636	0.35778	0.45754	0.556314	0.0269088	0
O	6	Sample X342	5599	6949	8081	8995	9808	10498				0.140356	0.324672	0.508801	0.6827	0.861144	1.03416		O	6	0.138855	0.349073	0.538293	0.708455	0.881577	0.0495148	0
O	7	Sample X343	3914	4819	5341	5923	6526	7062				-0.0489555	0.0478361	0.108736	0.181591	0.263234	0.341713		O	7	0.103191	0.202309	0.26151	0.333289	0.413136	0.020663	0
O	8	Sample X344	4670	5586	6480	7248	7905	8440				0.0311648	0.138737	0.256768	0.370372	0.478091	0.574099		O	8	0.0296641	0.163139	0.286259	0.396126	0.498524	0.0312573	0
O	9	Sample X345	4021	4887	5258	5947	6533	7013				-0.0380479	0.0555466	0.0987836	0.184716	0.264221	0.33429		O	9	0.114098	0.21002	0.251557	0.336414	0.414124	0.0200017	0
O	10	Sample X346	4572	5144	5607	6189	6553	6930				0.0203641	0.0852832	0.141353	0.216789	0.267048	0.321833		O	10	0.0188635	0.109685	0.170845	0.242544	0.287481	0.0179079	0
O	11	Sample X347	3751	4352	4944	5502	5847	6263				-0.0653124	-0.00342056	0.06206	0.128345	0.171761	0.226807		O	11	0.0868338	0.151052	0.214833	0.280043	0.321664	0.0156553	0
O	12	Sample X348	4160	4400	4685	4945	5157	5358				-0.0236718	0.00171521	0.0328293	0.0621747	0.0868129	0.110788		O	12	-0.0251724	0.0261166	0.0623213	0.0879295	0.107246	0.00882791	0
O	13	Sample X349	3754	4187	4657	5046	5420	5746				-0.0650142	-0.0208518	0.0297246	0.0738313	0.118307	0.158848		O	13	0.0871321	0.133621	0.182498	0.225529	0.26821	0.0120719	0
O	14	Sample X350	4284	4466	4622	4774	4901	5004				-0.0106459	0.00882544	0.0258585	0.0427689	0.0571421	0.0689662		O	14	-0.0121465	0.0332269	0.0553505	0.0685238	0.0775754	0.00598146	0
O	15	Sample X351	3245	3529	3836	4130	4371	4616				-0.114181	-0.0871005	-0.0568214	-0.0267945	-0.00139119	0.0251974		O	15	0.0379648	0.0673725	0.095952	0.124904	0.148512	0.00736978	0
O	16	Sample X352	4255	4354	4427	4461	4516	4569				-0.0137095	-0.00320716	0.00461712	0.00828481	0.0142498	0.0200355		O	16	-0.0152101	0.0211942	0.0341091	0.0340396	0.034683	0.00332621	0
O	17	Sample X353	3272	3472	3648	3811	4002	4152				-0.111644	-0.092606	-0.0754904	-0.0593274	-0.0399947	-0.0245056		O	17	0.0405022	0.0618671	0.0772829	0.0923706	0.109908	0.00462705	0
O	18	Sample X354	4124	4212	4305	4375	4432	4433				-0.0274177	-0.0182327	-0.00842082	-0.000963361	0.00515554	0.00526327		O	18	-0.0289184	0.00616873	0.0210711	0.0247915	0.0255888	0.00363381	0
O	19	Sample X355	3001	3159	3285	3368	3477	3585				-0.136768	-0.122212	-0.11042	-0.10256	-0.0921244	-0.0816566		O	19	0.0153787	0.0322606	0.0423537	0.0491385	0.0577783	0.00282664	0
O	20	Sample X356	4103	4178	4275	4330	4334	4330				-0.0295955	-0.0217928	-0.0115978	-0.00576461	-0.00533888	-0.00576461		O	20	-0.0310962	0.0026086	0.0178941	0.0199902	0.0150944	0.00307937	0
O	21	Sample X357	2897	2959	3074	3115	3178	3232				-0.14621	-0.140594	-0.130075	-0.126292	-0.120445	-0.1154		O	21	0.00593634	0.0138791	0.0226988	0.0254065	0.0294579	0.0015681	0
O	22	Sample X358	4060	4060	4086	4059	4100	4123				-0.034038	-0.034038	-0.0313546	-0.0341411	-0.0299062	-0.0275216		O	22	-0.0355387	-0.00963661	-0.00186261	-0.00838623	-0.00947293	0.00173771	0
O	23	Sample X359	2831	2805	2824	2836	2856	2881				-0.152146	-0.154473	-0.152773	-0.151698	-0.149903	-0.147653		O	23	0	0	0	0	0	0	0
O	24	Sample X360	4398	4153	4104	4140	4191	4190				0.00150063	-0.0244014	-0.0294919	-0.0257548	-0.0204333	-0.0205379		O	24	0	0	0	0	0	0	0
P	1	Sample X361	16284	16015	16318	16183	16408	16044					16	16044	18238		4.70395		P	1	0	16	15957	13949	0		1			11432.7	#DIV/0!
P	2	Sample X362	16817	17350	17817	18172	18298	18238									10.7833		P	2	0	0	0	0	0
P	3	Sample X363	15663	15149	15275	15324	15314	15340					8	15340	16441		3.82982		P	3	0	8	15253	12152	0		0.5			10596.3	#DIV/0!
P	4	Sample X364	16539	14169	15759	16344	16360	16441									5.32766		P	4	0	0	0	0	0
P	5	Sample X365	9928	9726	9770	9762	9877	10082					4	10082	15600		1.00503		P	5	0	4	9995	11311	0		0.25			8562	#DIV/0!
P	6	Sample X366	14960	15320	15428	15511	15622	15600									4.12393		P	6	0	0	0	0	0		0
P	7	Sample X367	2620	2760	2766	2770	2792	2802					2	2802	12838		-0.149453		P	7	0	2	2715	8549	0		0.125			5214	#DIV/0!
P	8	Sample X368	11721	10851	12084	12566	12827	12838									2.00784		P	8	0	0	0	0	0
P	9	Sample X369	2858	2518	2644	2818	2875	2897					1	2897	10053		-0.140505		P	9	0	1	2810	5764	0		0.0625			4317	#DIV/0!
P	10	Sample X370	9274	9297	9808	9853	10062	10053									0.997266		P	10	0	0	0	0	0
P	11	Sample X371	4071	4174	3008	2968	3081	3064					0.5	3064	7366		-0.124541		P	11	0	0.5	2977	3077	0		0.03125			3476.83	#DIV/0!
P	12	Sample X372	6858	7064	7416	7298	7367	7366									0.425679		P	12	0	0	0	0	0
P	13	Sample X373	2551	2420	2430	3062	2875	2850					0.25	2850	6124		-0.144944		P	13	0	0.25	2763	1835	0		0.015625			2991.42	#DIV/0!
P	14	Sample X374	5807	5892	6081	6175	6209	6124									0.233229		P	14	0	0	0	0	0
P	15	Sample X375	1622	1779	1775	1715	2061	2129					0.125	2129	4846		-0.210204		P	15	0	0.125	2042	557	0		0			2325.04	#DIV/0!
P	16	Sample X376	4440	4489	4605	4751	4829	4846									0.0668962		P	16	0	0	0	0	0
P	17	Sample X377	1756	1633	1655	1663	1693	1694					0.0625	1694	4708		-0.247169		P	17	0	0.0625	1607	419	0
P	18	Sample X378	4392	4049	4347	4581	4682	4708									0.0505365		P	18	0	0	0	0	0
P	19	Sample X379	744	757	686	719	750	784					0.03125	784	4343		-0.319246		P	19	0	0.03125	697	54	0
P	20	Sample X380	4094	3994	4006	4223	4328	4343									0.00860611		P	20	0	0	0	0	0
P	21	Sample X381	1349	1328	1392	1326	1411	1418					0.015625	1418	4677		-0.269753		P	21	0	0.015625	1331	388	0
P	22	Sample X382	4498	4479	4569	4637	4659	4677									0.0469006		P	22	0	0	0	0	0
P	23	Sample X383	85	85	90	83	85	87					0	87	4289		-0.370126		P	23	0	0	0	0	0
P	24	Sample X384	4157	3734	3972	4212	4311	4289									0.00256214		P	24	0	0	0	0	0
[truncated: 12 more columns]
