# Supplementary material for: PDZ-directed substrate recruitment is the primary determinant of specific 4E-BP1 dephosphorylation by PP1-Neurabin
Source: eLife journal article supplement (doi:10.7554/elife.103403), 2024-11-20
Supplement: fig5-data1 [file Peptides with 0.2nM PP1-NEB rep2.xlsx]

## Sheet: All Cycles
Well Row	Well Col	Content	Raw Data (425-10/460-20)	Raw Data (425-10/460-20)	Raw Data (425-10/460-20)	Raw Data (425-10/460-20)	Raw Data (425-10/460-20)	Raw Data (425-10/460-20)	Raw Data (425-10/460-20)	Raw Data (425-10/460-20)	Raw Data (425-10/460-20)	Raw Data (425-10/460-20)							Well Col
		Time [s]	0	120	240	360	480	600	720	840	960	1080			12.8	14881.5	14754.5			60	180	300	420	540	660	780	900	1020	1140	Rates	const…	Norm. rate			IRSp53-PDZ			IRSp53-SGS			4ebp1-70-PDZ			4ebp1-70-SGS			L5A-PDZ
A	1	Sample X1	7434	8474	9537	10641	11741	12602	13479	14354	14914	15654			6.4	13498.1	12872	IRSp53-PDZ	1	0.935788	1.27323	1.70121	2.27198	3.03273	3.83427	4.94701	6.55416	8.0228	10.9287	0.00859972	-0.809645	0.00861594		200	0.00861594	0.00347309	0.00248331	0.000661349	0.000133887	5.62463e-05	0.000767841	0.0010092	0.000809188	6.39056e-05	-1.08808e-07	3.1047e-05	0.00168106	0.0023064	0.00169403
B	1	Sample X25	6180	7258	8256	9106	9905	10672	11313	11974	12588	13051			3.2	10633.1	10556.2	IRSp53-PDZ	1	0.606126	0.884989	1.19669	1.51571	1.87472	2.29041	2.70813	3.228	3.81929	4.35722	0.00345704	0.173902	0.00347309		100	0.010636	0.00260038	0.00352752	0.000178114	4.49952e-05	2.25109e-05	0.000631231	0.000842219	-2.45381e-06	0.000114142	-8.48716e-06	1.08433e-05	0.00152508	0.0017818	0.00169333
C	1	Sample X49	5748	6674	7668	8543	9299	9975	10498	11033	11492	11874			1.6	8250.9	8215.9	IRSp53-PDZ	1	0.507852	0.72748	1.00594	1.29817	1.59657	1.90947	2.18891	2.51656	2.8389	3.14245	0.00247624	0.287488	0.00248331		50	0.00415807	0.00110419	0.00235069	0.000194222	7.97132e-06	5.2179e-06	0.000539404	0.00072967	0.000550049	-1.21479e-05	1.6395e-05	-2.216e-05	0.0015013	0.00186319	0.00155553
D	1	Sample X73	4354	4735	5145	5482	5828	6208	6543	6851	7155	7405			0.8	6137.7	6114.2	IRSp53-SGS	1	0.232353	0.302015	0.381497	0.450644	0.525536	0.612739	0.694303	0.773517	0.856007	0.927304	0.00065206	0.184356	0.000661349		25	0.00259591	0.00195997	0.00206796	8.28148e-05	4.01119e-06	-2.01169e-05	0.000134657	0.000576976	0.000426572	3.25462e-06	-3.04803e-05	-3.95167e-05	0.00135933	0.00161568	0.00136197
E	1	Sample X97	3969	4062	4147	4246	4313	4407	4497	4579	4657	4754			0.4	5102.2	5010.2	IRSp53-SGS	1	0.165731	0.181494	0.196082	0.213295	0.225084	0.241814	0.258047	0.273023	0.287436	0.305592	0.000128082	0.15791	0.000133887		12.5	0.00161356	0.00153923	0.00151271	4.24201e-05	-1.39196e-05	-2.33296e-05	0.000304794	0.000400247	0.000310442	-2.56639e-06	-1.86102e-05	-6.16632e-05	0.000997893	0.00125752	0.0010655
F	1	Sample X121	4544	4600	4638	4712	4719	4755	4799	4827	4868	4952			0.2	4044	3898.6	IRSp53-SGS	1	0.266609	0.276887	0.28391	0.297698	0.299011	0.30578	0.314103	0.319428	0.327265	0.343473	6.45448e-05	0.264689	5.62463e-05		6.25	0.00145512	0.000959706	0.000940405	6.3142e-06	-1.31719e-05	-3.59178e-05	0.000182277	0.00028079	0.000179017	-2.48029e-05	-1.10173e-05	-2.68846e-05	0.000700349	0.000765022	0.000798241
G	1	Sample X145	4012	4442	4858	5247	5664	6080	6509	6905	7271	7616			0.1	3428	3274.3	4ebp1-70-PDZ	1	0.172994	0.248102	0.325349	0.402048	0.489526	0.582758	0.685813	0.787847	0.888686	0.990083	0.000762369	0.0998992	0.000767841		3.125	0.000746594	0.000579446	0.000573274	1.48388e-05	-8.9919e-06	-3.20931e-05	9.87788e-05	0.000165188	0.000107063	4.56927e-06	-1.18146e-05	-1.00455e-05	0.000444048	0.000543301	0.000459894
H	1	Sample X169	3955	4423	4887	5363	5859	6331	6880	7382	7751	8147			0.05	3101.5	3059.4	4ebp1-70-PDZ	1	0.163376	0.244685	0.330913	0.425815	0.53245	0.642154	0.781196	0.920608	1.03157	1.15966	0.000939345	0.0596353	0.0010092		1.5625	-0.000232567	0.000289199	0.00029591	9.53915e-06	-4.37761e-06	-2.72676e-05	6.1295e-05	0.000126891	3.71924e-05	5.89536e-06	-2.58863e-06	-1.29368e-05	0.00021793	0.00027914	0.000250241
I	1	Sample X193	3674	4105	4632	5122	5609	6067	6505	6895	7230	7557			0.025	2888.4	2824.7	4ebp1-70-PDZ	1	0.117062	0.188852	0.282798	0.376907	0.477658	0.579748	0.684817	0.785183	0.877057	0.97228	0.000810714	0.0478078	0.000809188		0.78125	0.000169102	0.000156786	0.000158901	-5.45027e-06	-8.98641e-08	-3.37716e-05	8.86289e-06	7.78567e-05	1.93847e-05	3.0211e-05	1.04629e-05	-3.19232e-05	0.000102732	0.000141525	0.000131169
J	1	Sample X217	10678	10527	10423	10406	10382	10337	10364	10299	10299	10275			0.0125	2843.8	2820.1	-	1	2.29399	2.20551	2.14655	2.13706	2.12373	2.09896	2.11379	2.07826	2.07826	2.06529	-0.000170962	2.23672	-0.000164037		0.390625	4.3452e-05	8.13017e-05	8.28639e-05	5.32375e-06	-1.48754e-05	-2.48897e-05	2.15984e-05	6.60461e-05	1.05017e-05	-0.000257905	-2.88802e-06	4.66217e-08	5.86622e-05	6.03728e-05	6.39945e-05
K	1	Sample X241	8347	8404	8439	8532	8551	8563	8617	8605	8596	8632			0	3003.7	2717.2	-	1	1.22823	1.24828	1.26071	1.29417	1.30108	1.30547	1.32531	1.32088	1.31757	1.33087	9.12838e-05	1.23849	0.000100739		0.195312	3.46415e-05	3.72241e-05	2.57608e-05	9.67083e-05	1.00209e-08	-1.58342e-05	9.68855e-06	6.34317e-05	-1.04314e-06	1.99372e-05	3.59368e-06	1.10423e-05	2.45903e-05	3.01199e-05	3.72682e-05
L	1	Sample X265	15425	15138	14956	14824	14697	14595	14499	14254	14296	14248						-	1	9.8678	8.75741	8.15297	7.75456	7.39904	7.13131	6.89256	6.33502	6.42571	6.32222	-0.00303917	9.32736	-0.0030504		0	0	0	0	0	0	0	0	0	0	0	0	0	0	0	0
A	2	Sample X2	9650	9269	9406	9494	9577	9571	9543	9480	9569	9642						4ebp1-70-SGS	1	1.75291	1.58378	1.64292	1.68188	1.71936	1.71662	1.70392	1.67563	1.71571	1.74921	5.64226e-05	1.66034	6.39056e-05
B	2	Sample X26	4637	4546	4580	4637	4631	4595	4554	4544	4537	4592						4ebp1-70-SGS	1	0.283725	0.266975	0.273207	0.283725	0.282613	0.275966	0.268438	0.266609	0.26533	0.275414	-8.6769e-06	0.279406	-1.08808e-07		*1000000
C	2	Sample X50	3667	3666	3748	3810	3811	3806	3801	3811	3844	3869						4ebp1-70-SGS	1	0.115931	0.11577	0.129085	0.139253	0.139417	0.138594	0.137771	0.139417	0.144866	0.14901	2.76656e-05	0.118312	3.1047e-05			IRSp53-PDZ			IRSp53-SGS			4ebp1-70-PDZ			4ebp1-70-SGS			L5A-PDZ
D	2	Sample X74	4957	6074	6909	7610	8258	8791	9292	9725	10100	10491						L5A-PDZ	1	0.344444	0.581368	0.788914	0.988264	1.19738	1.39081	1.59358	1.78798	1.973	2.18492	0.00168235	0.273658	0.00168106		200	0.516956	0.208385	0.148998	0.0396809	0.00803323	0.00337478	0.0460705	0.0605519	0.0485513	0.00383433	-6.52845e-06	0.00186282	0.100863	0.138384	0.101642
E	2	Sample X98	5667	6709	7637	8461	9164	9752	10310	10813	11245	11693						L5A-PDZ	1	0.490176	0.736471	0.996468	1.26857	1.53965	1.80076	2.08423	2.37613	2.6602	2.99422	0.00230348	0.3126	0.0023064		100	0.638159	0.156023	0.211651	0.0106868	0.00269971	0.00135065	0.0378739	0.0505331	-0.000147229	0.00684855	-0.000509229	0.000650599	0.0915049	0.106908	0.1016
F	2	Sample X122	5495	6311	7141	7880	8457	9002	9470	9898	10301	10638						L5A-PDZ	1	0.453385	0.63733	0.852109	1.07222	1.26714	1.47354	1.67118	1.87128	2.07934	2.27021	0.00169417	0.348269	0.00169403		50	0.249484	0.0662516	0.141041	0.0116533	0.000478279	0.000313074	0.0323642	0.0437802	0.0330029	-0.000728875	0.000983697	-0.0013296	0.090078	0.111791	0.0933317
G	2	Sample X146	4033	4444	4807	5113	5392	5635	5868	6116	6347	6555						L5A-SGS	1	0.176557	0.248462	0.315622	0.375115	0.431824	0.483255	0.534464	0.591126	0.646026	0.697311	0.000473572	0.165833	0.00047894		25	0.155755	0.117598	0.124078	0.00496889	0.000240671	-0.00120702	0.00807941	0.0346186	0.0255943	0.000195277	-0.00182882	-0.002371	0.08156	0.0969409	0.0817182
H	2	Sample X170	3798	3892	3989	4080	4158	4208	4272	4340	4414	4516						L5A-SGS	1	0.137278	0.152835	0.169104	0.184568	0.197982	0.206659	0.217857	0.229866	0.243069	0.261501	0.000109192	0.134557	0.00011503		12.5	0.0968133	0.0923538	0.0907626	0.0025452	-0.000835177	-0.00139978	0.0182877	0.0240148	0.0186265	-0.000153983	-0.00111661	-0.00369979	0.0598736	0.0754509	0.06393
I	2	Sample X194	5158	5216	5268	5260	5258	5277	5248	5292	5315	5378						L5A-SGS	1	0.384099	0.395768	0.406319	0.404691	0.404284	0.408154	0.402251	0.411218	0.415929	0.428919	2.85634e-05	0.389025	1.83125e-05		6.25	0.0873071	0.0575823	0.0564243	0.000378852	-0.000790312	-0.00215507	0.0109366	0.0168474	0.010741	-0.00148818	-0.00066104	-0.00161307	0.042021	0.0459013	0.0478945
J	2	Sample X218	15014	14920	14854	14821	14820	14879	14836	14873	14906	14892						PO4-std	1	8.33826	8.0412	7.8424	7.74586	7.74296	7.91679	7.78951	7.89884	7.99838	7.95591	-0.000159286	8.02258	-0.000159501		3.125	0.0447956	0.0347668	0.0343965	0.000890325	-0.000539514	-0.00192559	0.00592673	0.0099113	0.00642375	0.000274156	-0.000708878	-0.000602731	0.0266429	0.0325981	0.0275936
K	2	Sample X242	14880	14769	14712	14712	14709	14720	14700	14776	14754	14813						PO4-std	1	7.91979	7.59743	7.43971	7.43971	7.43155	7.46154	7.40715	7.61715	7.55543	7.72273	-6.30314e-05	7.59704	-6.91695e-05		1.5625	-0.013954	0.0173519	0.0177546	0.000572349	-0.000262657	-0.00163606	0.0036777	0.00761347	0.00223154	0.000353722	-0.000155318	-0.000776205	0.0130758	0.0167484	0.0150144
L	2	Sample X266	18707	18673	18739	18866	18856	18872	18896	18931	18974	18930						PO4-std	1	-80.666	-87.2498	-75.3379	-59.8142	-60.7933	-59.2423	-57.0639	-54.1698	-51.0071	-54.2483	0.0306617	-82.3562	0.0306521		0.78125	0.0101461	0.00940716	0.00953404	-0.000327016	-5.39185e-06	-0.0020263	0.000531773	0.0046714	0.00116308	0.00181266	0.000627774	-0.00191539	0.00616392	0.00849152	0.00787014
A	3	Sample X3	6933	8474	9798	11010	12057	12965	13874	14618	15365	16088						IRSp53-PDZ	2	0.795331	1.27323	1.82272	2.50148	3.30109	4.2502	5.59326	7.19037	9.61751	13.5507	0.0106198	-1.38226	0.010636		0.390625	0.00260712	0.0048781	0.00497183	0.000319425	-0.000892522	-0.00149338	0.00129591	0.00396277	0.000630101	-0.0154743	-0.000173281	2.7973e-06	0.00351973	0.00362237	0.00383967
B	3	Sample X27	5310	6545	7587	8515	9335	9991	10592	11115	11555	11895						IRSp53-PDZ	2	0.414903	0.694804	0.981308	1.28801	1.61204	1.9175	2.24317	2.57111	2.88658	3.16019	0.00258434	0.226356	0.00260038		0.195312	0.00207849	0.00223345	0.00154565	0.0058025	6.01256e-07	-0.000950052	0.000581313	0.0038059	-6.25886e-05	0.00119623	0.000215621	0.000662536	0.00147542	0.0018072	0.00223609
C	3	Sample X51	5725	7270	8587	9610	10472	11129	11692	12194	12632	13000						IRSp53-PDZ	2	0.50281	0.888401	1.31426	1.73446	2.17413	2.58055	2.99342	3.42612	3.86661	4.29334	0.00352045	0.265142	0.00352752		0	0	0	0	0	0	0	0	0	0	0	0	0	0	0	0
D	3	Sample X75	3682	3856	4009	4158	4272	4369	4471	4550	4677	4747						IRSp53-SGS	2	0.118356	0.146853	0.172486	0.197982	0.217857	0.235024	0.253336	0.267706	0.291158	0.304273	0.000168824	0.119209	0.000178114
E	3	Sample X99	3481	3540	3579	3615	3631	3681	3686	3710	3727	3770						IRSp53-SGS	2	0.0862716	0.0955986	0.101805	0.107563	0.110132	0.118194	0.119003	0.122896	0.125661	0.132683	3.91905e-05	0.0884664	4.49952e-05		5x
F	3	Sample X123	3557	3626	3656	3677	3681	3687	3719	3744	3770	3800						IRSp53-SGS	2	0.0982999	0.109329	0.114156	0.117547	0.118194	0.119165	0.124359	0.128432	0.132683	0.137607	3.08095e-05	0.101491	2.25109e-05		200	2.58478	1.04193	0.744992	0.198405	0.0401661	0.0168739	0.230352	0.302759	0.242757	0.0191717	-3.26423e-05	0.00931409	0.504317	0.691921	0.50821
G	3	Sample X147	3688	4062	4435	4793	5133	5536	5912	6249	6590	6924						4ebp1-70-PDZ	2	0.119327	0.181494	0.246842	0.312965	0.3791	0.462065	0.544351	0.622477	0.706121	0.792922	0.000625759	0.0613107	0.000631231		100	3.19079	0.780115	1.05826	0.0534341	0.0134986	0.00675327	0.189369	0.252666	-0.000736143	0.0342427	-0.00254615	0.003253	0.457524	0.534539	0.507998
H	3	Sample X171	3723	4132	4531	4956	5374	5810	6256	6732	7114	7477						4ebp1-70-PDZ	2	0.125009	0.193495	0.264235	0.344249	0.428091	0.521538	0.624147	0.74241	0.844619	0.948451	0.000772366	0.0402045	0.000842219		50	1.24742	0.331258	0.705206	0.0582666	0.0023914	0.00156537	0.161821	0.218901	0.165015	-0.00364438	0.00491849	-0.006648	0.45039	0.558956	0.466658
I	3	Sample X195	12500	12587	12583	12498	12465	12452	12475	12491	12550	12587						4ebp1-70-PDZ	2	3.72682	3.81823	3.81396	3.72475	3.69082	3.67756	3.70106	3.71752	3.77901	3.81823	-9.28042e-07	3.74735	-2.45381e-06		25	0.778774	0.587992	0.620389	0.0248444	0.00120336	-0.00603508	0.0403971	0.173093	0.127972	0.000976387	-0.00914408	-0.011855	0.4078	0.484704	0.408591
J	3	Sample X219	12288	12129	12067	12014	11979	11946	11861	11895	11790	11784						-	2	3.51522	3.3661	3.31003	3.26298	3.23234	3.20377	3.13152	3.16019	3.07263	3.06771	-0.000366368	3.45207	-0.000359442		12.5	0.484067	0.461769	0.453813	0.012726	-0.00417589	-0.00699888	0.0914383	0.120074	0.0931327	-0.000769917	-0.00558305	-0.018499	0.299368	0.377255	0.31965
K	3	Sample X243	10773	10782	10765	10767	10662	10610	10588	10487	10432	10378						-	2	2.35148	2.35701	2.34658	2.34781	2.28445	2.25371	2.24083	2.18264	2.15159	2.12152	-0.000236312	2.40555	-0.000226856		6.25	0.436536	0.287912	0.282121	0.00189426	-0.00395156	-0.0107753	0.0546832	0.0842369	0.0537052	-0.00744088	-0.0033052	-0.00806537	0.210105	0.229507	0.239472
L	3	Sample X267	16765	16549	16433	16351	16226	16125	16047	16008	15892	15831						-	2	20.6643	17.786	16.5199	15.7174	14.618	13.8234	13.2592	12.9917	12.248	11.8853	-0.00725192	19.3025	-0.00726314		3.125	0.223978	0.173834	0.171982	0.00445163	-0.00269757	-0.00962794	0.0296336	0.0495565	0.0321188	0.00137078	-0.00354439	-0.00301365	0.133214	0.16299	0.137968
A	4	Sample X4	8741	8450	8563	8580	8476	8523	8687	8799	8838	8892						4ebp1-70-SGS	2	1.37175	1.26464	1.30547	1.31169	1.27395	1.2909	1.35138	1.39388	1.40892	1.42994	0.000106659	1.27626	0.000114142		1.5625	-0.06977	0.0867597	0.0887729	0.00286175	-0.00131328	-0.00818029	0.0183885	0.0380673	0.0111577	0.00176861	-0.000776589	-0.00388103	0.0653791	0.0837419	0.0750722
B	4	Sample X28	4511	4474	4470	4505	4456	4427	4340	4346	4413	4477						4ebp1-70-SGS	2	0.260592	0.253879	0.253155	0.259501	0.250626	0.245404	0.229866	0.230931	0.24289	0.254422	-1.70553e-05	0.25836	-8.48716e-06		0.78125	0.0507307	0.0470358	0.0476702	-0.00163508	-2.69592e-05	-0.0101315	0.00265887	0.023357	0.00581542	0.00906329	0.00313887	-0.00957696	0.0308196	0.0424576	0.0393507
C	4	Sample X52	4445	4380	4411	4437	4467	4478	4478	4468	4476	4415						4ebp1-70-SGS	2	0.248643	0.236986	0.242531	0.247202	0.252613	0.254603	0.254603	0.252794	0.254241	0.243249	7.4619e-06	0.244269	1.08433e-05		0.390625	0.0130356	0.0243905	0.0248592	0.00159713	-0.00446261	-0.00746691	0.00647953	0.0198138	0.00315051	-0.0773714	-0.000866407	1.39865e-05	0.0175987	0.0181119	0.0191984
D	4	Sample X76	4585	5530	6360	7084	7718	8243	8734	9196	9630	10027						L5A-PDZ	2	0.274126	0.460791	0.649178	0.83634	1.02133	1.19223	1.36909	1.55299	1.74366	1.93567	0.00152637	0.187717	0.00152508		0.195312	0.0103925	0.0111672	0.00772824	0.0290125	3.00628e-06	-0.00475026	0.00290657	0.0190295	-0.000312943	0.00598116	0.0010781	0.00331268	0.00737708	0.00903598	0.0111804
E	4	Sample X100	6284	7198	7959	8551	9129	9581	10008	10406	10781	11127						L5A-PDZ	2	0.630843	0.868041	1.09762	1.30108	1.52517	1.72118	1.92606	2.13706	2.35639	2.57919	0.00177888	0.546939	0.0017818		0	0	0	0	0	0	0	0	0	0	0	0	0	0	0	0
F	4	Sample X124	5033	5993	6823	7540	8180	8759	9233	9720	10113	10505						L5A-PDZ	2	0.359296	0.562737	0.766139	0.967186	1.17078	1.37859	1.56853	1.78563	1.97972	2.1929	0.00169347	0.257071	0.00169333
G	4	Sample X148	3546	3783	3983	4185	4351	4504	4689	4838	5003	5193						L5A-SGS	2	0.0965513	0.134814	0.168091	0.20266	0.23182	0.259319	0.293397	0.321526	0.353413	0.391128	0.000265064	0.0862336	0.000270431
H	4	Sample X172	3425	3504	3544	3541	3526	3522	3563	3636	3698	3739						L5A-SGS	2	0.0774874	0.0898987	0.0962336	0.0957573	0.0933786	0.0927452	0.0992548	0.110935	0.120948	0.127616	3.79733e-05	0.0776415	4.38111e-05
I	4	Sample X196	3720	3696	3689	3688	3676	3682	3683	3693	3731	3745						L5A-SGS	2	0.124521	0.120624	0.119489	0.119327	0.117385	0.118356	0.118518	0.120137	0.126312	0.128595	3.95277e-06	0.118955	-6.29818e-06
J	4	Sample X220	13647	13467	13420	13443	13422	13481	13489	13519	13535	13558						PO4-std	2	5.20837	4.92904	4.85952	4.89337	4.86245	4.95001	4.96205	5.00756	5.03207	5.06759	2.4645e-05	4.96241	2.44301e-05
K	4	Sample X244	13097	12906	12813	12849	12794	12832	12860	12824	12858	12887						PO4-std	2	4.41593	4.17877	4.0693	4.11123	4.0474	4.09136	4.12415	4.08205	4.1218	4.1561	-0.000130848	4.21832	-0.000136986
L	4	Sample X268	2094	2046	2002	1988	1959	1926	1898	1877	1850	1813						PO4-std	2	-0.113389	-0.119688	-0.125429	-0.127249	-0.131009	-0.135272	-0.138875	-0.14157	-0.145024	-0.149739	-3.1533e-05	-0.113804	-4.108e-05
A	5	Sample X5	5555	7029	8231	9276	10133	10861	11579	12266	13011	13579						IRSp53-PDZ	3	0.466106	0.821275	1.18812	1.58675	1.9901	2.40606	2.90498	3.49411	4.30701	5.10032	0.00414185	-0.0586272	0.00415807
B	5	Sample X29	12524	12482	12805	13079	13243	13358	13402	13371	13342	13357						IRSp53-PDZ	3	3.75176	3.70825	4.06006	4.39283	4.60937	4.76984	4.83325	4.78846	4.74707	4.76842	0.00108815	3.79004	0.00110419
C	5	Sample X53	4665	5775	6790	7701	8445	9168	9830	10465	11013	11450						IRSp53-PDZ	3	0.288923	0.513795	0.757491	1.01608	1.26285	1.54131	1.83813	2.17017	2.50344	2.8076	0.00234361	0.0638106	0.00235069
D	5	Sample X77	3550	3639	3820	3958	4037	4134	4264	4436	4590	4716						IRSp53-SGS	3	0.0971868	0.111418	0.140901	0.163881	0.177236	0.193839	0.216451	0.247022	0.275046	0.298448	0.000184933	0.0811833	0.000194222
E	5	Sample X101	3408	3448	3494	3508	3496	3453	3417	3427	3458	3503						IRSp53-SGS	3	0.0748339	0.0810872	0.0883203	0.0905306	0.0886358	0.0818712	0.076238	0.0778	0.0826558	0.0897407	2.16655e-06	0.0818714	7.97132e-06
F	5	Sample X125	3274	3339	3374	3391	3364	3336	3328	3364	3404	3445						IRSp53-SGS	3	0.0541286	0.0641258	0.0695451	0.0721865	0.0679941	0.0636625	0.0624278	0.0679941	0.0742104	0.080617	1.35165e-05	0.0595793	5.2179e-06
G	5	Sample X149	3598	3938	4255	4561	4853	5204	5539	5895	6193	6476						4ebp1-70-PDZ	3	0.104841	0.160523	0.214872	0.26972	0.324392	0.393345	0.462702	0.540523	0.609193	0.677619	0.000533932	0.055414	0.000539404
H	5	Sample X173	3598	4038	4409	4807	5173	5559	5971	6346	6662	7014						4ebp1-70-PDZ	3	0.104841	0.177406	0.242173	0.315622	0.387107	0.466958	0.55772	0.645783	0.72441	0.817192	0.000659818	0.0480307	0.00072967
I	5	Sample X197	3180	3570	3953	4278	4641	5043	5401	5720	6004	6253						4ebp1-70-PDZ	3	0.0398234	0.10037	0.16304	0.218912	0.284466	0.361263	0.433694	0.501716	0.565253	0.623431	0.000551574	-0.00174784	0.000550049
J	5	Sample X221	12180	12226	12217	12226	12234	12248	12284	12263	12290	12266						-	3	3.41308	3.45614	3.44766	3.45614	3.46369	3.47696	3.51137	3.49125	3.51714	3.49411	7.84429e-05	3.42569	8.53682e-05
K	5	Sample X245	10976	11085	11084	11174	11132	11136	11101	11090	11041	10992						-	3	2.47936	2.551	2.55034	2.61114	2.58257	2.58528	2.5617	2.55434	2.52182	2.48974	-1.19388e-05	2.55589	-2.48311e-06
L	5	Sample X269	17788	17715	17664	17623	17637	17704	17783	17860	18039	18330						-	3	69.4833	60.0151	54.7583	51.135	52.3193	58.8008	68.7439	82.1407	148.099	-557.535	-0.243957	155.17	-0.243968
A	6	Sample X6	5881	5840	5884	5847	5862	5829	5817	5798	5793	5785						4ebp1-70-SGS	3	0.537378	0.528209	0.538051	0.52977	0.533121	0.525759	0.523091	0.518878	0.517772	0.516003	-1.96309e-05	0.538582	-1.21479e-05
B	6	Sample X30	3046	3126	3138	3161	3202	3210	3233	3208	3127	3096						4ebp1-70-SGS	3	0.0197364	0.0316859	0.0334892	0.0369536	0.0431554	0.0443695	0.0478671	0.0440659	0.0318361	0.0271901	7.82686e-06	0.0313388	1.6395e-05
C	6	Sample X54	3431	3414	3450	3464	3425	3376	3298	3255	3294	3331						4ebp1-70-SGS	3	0.0784254	0.0757698	0.0814007	0.0835979	0.0774874	0.0698555	0.0578098	0.0512227	0.0571954	0.0628907	-2.55414e-05	0.0848904	-2.216e-05
D	6	Sample X78	4120	5094	6059	6785	7384	7940	8436	8926	9440	9811						L5A-PDZ	3	0.191429	0.371341	0.577899	0.756184	0.921189	1.09148	1.25964	1.44331	1.65788	1.82897	0.00150259	0.108377	0.0015013
E	6	Sample X102	4566	5588	6512	7297	8012	8665	9247	9765	10226	10640						L5A-PDZ	3	0.270637	0.473154	0.68656	0.896105	1.11488	1.34315	1.57445	1.80694	2.03904	2.27139	0.00186026	0.131472	0.00186319
F	6	Sample X126	4427	5359	6228	6974	7578	8139	8684	9178	9623	10012						L5A-PDZ	3	0.245404	0.424988	0.617481	0.806358	0.978594	1.15697	1.35025	1.54548	1.74044	1.92808	0.00155567	0.146003	0.00155553
G	6	Sample X150	3718	3811	3911	4029	4019	4046	4103	4229	4382	4470						L5A-SGS	3	0.124196	0.139417	0.156005	0.175877	0.17418	0.178767	0.188508	0.210322	0.237343	0.253155	0.0001091	0.118317	0.000114467
H	6	Sample X174	3716	3761	3744	3691	3580	3627	3668	3707	3743	3777						L5A-SGS	3	0.123871	0.13121	0.128432	0.119813	0.101965	0.109489	0.116093	0.122408	0.128269	0.13383	1.78239e-06	0.120468	7.62023e-06
I	6	Sample X198	4019	4049	4057	4064	4041	4001	3948	3917	3964	4011						L5A-SGS	3	0.17418	0.179278	0.180641	0.181835	0.177916	0.171132	0.162201	0.157007	0.16489	0.172824	-1.49887e-05	0.181184	-2.52397e-05
J	6	Sample X222	10724	10582	10563	10584	10572	10605	10656	10648	10686	10711						PO4-std	3	2.32165	2.23733	2.22629	2.2385	2.23151	2.25078	2.28088	2.27613	2.29877	2.3138	3.81341e-05	2.24468	3.79192e-05
K	6	Sample X246	10745	10564	10522	10475	10514	10520	10529	10540	10572	10581						PO4-std	3	2.33439	2.22687	2.20264	2.17583	2.19805	2.20149	2.20666	2.21299	2.23151	2.23675	-3.52791e-05	2.24388	-4.14172e-05
L	6	Sample X270	13743	13719	13709	13749	13765	13834	13830	13839	13894	13930						PO4-std	3	5.36643	5.32629	5.30969	5.37653	5.4036	5.52258	5.51558	5.53135	5.62909	5.69441	0.000339184	5.26405	0.000329637
A	7	Sample X7	4769	5965	7016	7985	8715	9318	10082	10746	11351	11863						IRSp53-PDZ	4	0.308422	0.556354	0.817736	1.10606	1.36191	1.60472	1.96374	2.33499	2.73532	3.1332	0.00257969	0.0444312	0.00259591
B	7	Sample X31	4498	5436	6337	7140	7906	8604	9205	9815	10294	10758						IRSp53-PDZ	4	0.258229	0.440992	0.643605	0.851831	1.08054	1.32052	1.55676	1.83089	2.07555	2.34231	0.00194393	0.073764	0.00195997
C	7	Sample X55	4570	5568	6536	7379	8062	8805	9456	10078	10533	10960						IRSp53-PDZ	4	0.271371	0.468878	0.692551	0.919737	1.13132	1.39619	1.66496	1.96168	2.20896	2.46902	0.00206089	0.0819335	0.00206796
D	7	Sample X79	3480	3533	3638	3705	3706	3715	3749	3859	3932	4022						IRSp53-SGS	4	0.0861141	0.0944881	0.111257	0.122084	0.122246	0.123708	0.129248	0.147351	0.159517	0.174689	7.35253e-05	0.0829551	8.28148e-05
E	7	Sample X103	3333	3342	3368	3375	3329	3289	3270	3303	3343	3382						IRSp53-SGS	4	0.0631993	0.0645893	0.0686142	0.0697003	0.0625821	0.0564279	0.0535162	0.0585781	0.0647439	0.0707873	-1.79359e-06	0.06435	4.01119e-06
F	7	Sample X127	3346	3389	3392	3380	3330	3275	3248	3271	3322	3347						IRSp53-SGS	4	0.0652076	0.0718754	0.072342	0.0704766	0.0627364	0.0542817	0.0501539	0.0536693	0.0615027	0.0653622	-1.18184e-05	0.0698518	-2.01169e-05
G	7	Sample X151	9315	9509	9548	9561	9395	9311	9396	9544	9710	9845						4ebp1-70-PDZ	4	1.60343	1.6886	1.70618	1.71208	1.6381	1.60171	1.63854	1.70437	1.78092	1.8454	0.000129185	1.61442	0.000134657
H	7	Sample X175	3466	3839	4153	4481	4781	5073	5417	5719	6022	6292						4ebp1-70-PDZ	4	0.0839122	0.144039	0.197118	0.255146	0.310692	0.367182	0.437025	0.501498	0.569379	0.632762	0.000507124	0.0456007	0.000576976
I	7	Sample X199	3062	3395	3683	3938	4226	4535	4821	5134	5384	5631						4ebp1-70-PDZ	4	0.0221163	0.0728088	0.118518	0.160523	0.209798	0.264965	0.318285	0.3793	0.430163	0.482393	0.000428098	-0.0109716	0.000426572
J	7	Sample X223	12162	12253	12254	12254	12236	12227	12218	12158	12149	12160						-	4	3.39641	3.48172	3.48267	3.48267	3.46558	3.45708	3.4486	3.39272	3.38443	3.39457	-6.3536e-05	3.47677	-5.66106e-05
K	7	Sample X247	11602	11602	11584	11516	11467	11425	11330	11293	11270	11249						-	4	2.92274	2.92274	2.90883	2.85696	2.82022	2.78915	2.72026	2.69394	2.67771	2.66299	-0.000281239	2.9663	-0.000271783
L	7	Sample X271	15113	15105	15221	15230	15273	15334	15517	15626	15581	15356						-	4	8.67025	8.64265	9.05703	9.09051	9.25321	9.4922	10.2728	10.7891	10.5709	9.58085	0.00172419	8.50743	0.00171296
A	8	Sample X8	4919	4909	4934	4914	4853	4787	4825	4877	4913	4936						4ebp1-70-SGS	4	0.337081	0.33515	0.339982	0.336115	0.324392	0.311828	0.319047	0.328992	0.335922	0.34037	-4.22834e-06	0.333425	3.25462e-06
B	8	Sample X32	3924	3825	3849	3887	3869	3792	3692	3628	3669	3718						4ebp1-70-SGS	4	0.158178	0.141726	0.145693	0.152003	0.14901	0.136292	0.119975	0.10965	0.116254	0.124196	-3.90484e-05	0.158727	-3.04803e-05
C	8	Sample X56	3711	3569	3560	3551	3524	3472	3373	3334	3393	3442						4ebp1-70-SGS	4	0.123058	0.10021	0.0987773	0.0973458	0.0930619	0.0848554	0.0693899	0.0633537	0.0724976	0.080147	-4.28981e-05	0.114009	-3.95167e-05
D	8	Sample X80	3864	4815	5659	6343	6957	7500	8040	8542	8982	9358						L5A-PDZ	4	0.14818	0.317143	0.488443	0.645057	0.801776	0.955265	1.12407	1.29781	1.46553	1.62199	0.00136062	0.0701516	0.00135933
E	8	Sample X104	4317	5293	6163	6913	7609	8200	8747	9262	9673	10080						L5A-PDZ	4	0.225791	0.411422	0.602127	0.789982	0.987961	1.17756	1.37402	1.5808	1.7636	1.96271	0.00161276	0.119943	0.00161568
F	8	Sample X128	4307	5172	5921	6575	7158	7712	8218	8714	9160	9521						L5A-PDZ	4	0.224023	0.386906	0.546382	0.702339	0.856844	1.01948	1.18369	1.36153	1.53799	1.694	0.00136211	0.134052	0.00136197
G	8	Sample X152	3579	3623	3651	3633	3574	3574	3628	3712	3780	3825						L5A-SGS	4	0.101805	0.108847	0.11335	0.110453	0.101007	0.101007	0.10965	0.123221	0.134322	0.141726	2.9523e-05	0.096825	3.48905e-05
H	8	Sample X176	3314	3370	3353	3281	3268	3280	3296	3296	3318	3343						L5A-SGS	4	0.0602704	0.0689244	0.0662904	0.055201	0.0532101	0.0550478	0.0575025	0.0575025	0.0608864	0.0647439	-2.58599e-06	0.0615096	3.25186e-06
I	8	Sample X200	3418	3466	3471	3433	3388	3338	3321	3366	3378	3408						L5A-SGS	4	0.0763941	0.0839122	0.0846981	0.0787383	0.0717199	0.0639713	0.0613486	0.0683041	0.070166	0.0748339	-1.27349e-05	0.0810496	-2.29859e-05
J	8	Sample X224	8416	8276	8216	8205	8182	8227	8212	8233	8258	8284						PO4-std	4	1.25253	1.20357	1.18301	1.17926	1.17146	1.18676	1.18164	1.18881	1.19738	1.20633	-2.05926e-05	1.20743	-2.08075e-05
K	8	Sample X248	8362	8223	8175	8179	8168	8182	8196	8211	8232	8231						PO4-std	4	1.23348	1.18539	1.16909	1.17044	1.16673	1.17146	1.1762	1.1813	1.18847	1.18812	-1.5337e-05	1.19227	-2.1475e-05
L	8	Sample X272	2479	2450	2449	2467	2430	2427	2407	2394	2417	2404						PO4-std	4	-0.061485	-0.0654826	-0.0656202	-0.0631409	-0.0682311	-0.0686428	-0.0713833	-0.0731609	-0.0700139	-0.0717937	-9.46162e-06	-0.0622185	-1.90086e-05
A	9	Sample X9	4349	5128	6079	6864	7491	7959	8488	9082	9612	10140						IRSp53-PDZ	5	0.231464	0.378103	0.582526	0.776954	0.952595	1.09762	1.27826	1.50589	1.73537	1.99375	0.00159733	0.0948532	0.00161356
B	9	Sample X33	4150	4900	5718	6438	7105	7742	8270	8868	9385	9807						IRSp53-PDZ	5	0.1966	0.333415	0.501279	0.668241	0.842131	1.02877	1.2015	1.42057	1.63373	1.82704	0.00152319	0.0514171	0.00153923
C	9	Sample X57	4204	5060	5910	6639	7270	7857	8376	8943	9397	9815						IRSp53-PDZ	5	0.205963	0.364614	0.5439	0.718543	0.888401	1.0649	1.2384	1.45003	1.63898	1.83089	0.00150564	0.0910797	0.00151271
D	9	Sample X81	3338	3346	3412	3400	3376	3389	3454	3504	3539	3582						IRSp53-SGS	5	0.0639713	0.0652076	0.0754577	0.0735873	0.0698555	0.0718754	0.0820281	0.0898987	0.0954399	0.102284	3.31306e-05	0.0590822	4.24201e-05
E	9	Sample X105	3322	3307	3356	3342	3223	3162	3171	3203	3229	3248						IRSp53-SGS	5	0.0615027	0.0591932	0.0667548	0.0645893	0.0463451	0.0371045	0.0384631	0.0433071	0.0472581	0.0501539	-1.97244e-05	0.0633018	-1.39196e-05
F	9	Sample X129	3348	3386	3369	3349	3282	3210	3229	3257	3298	3312						IRSp53-SGS	5	0.0655169	0.071409	0.0687693	0.0656716	0.0553543	0.0443695	0.0472581	0.0515282	0.0578098	0.0599626	-1.5031e-05	0.0677835	-2.33296e-05
G	9	Sample X153	3336	3580	3797	3970	4146	4331	4546	4767	4999	5212						4ebp1-70-PDZ	5	0.0636625	0.101965	0.137114	0.1659	0.195909	0.22827	0.266975	0.308045	0.35263	0.39496	0.000299322	0.0419496	0.000304794
H	9	Sample X177	3297	3540	3758	3951	4151	4353	4554	4836	5120	5340						4ebp1-70-PDZ	5	0.0576561	0.0955986	0.130719	0.162704	0.196773	0.232175	0.268438	0.321144	0.376509	0.421069	0.000330395	0.0280418	0.000400247
I	9	Sample X201	2889	3127	3318	3522	3748	3979	4228	4474	4674	4888						4ebp1-70-PDZ	5	-0.00335301	0.0318361	0.0608864	0.0927452	0.129085	0.167416	0.210148	0.253879	0.290599	0.331106	0.000311968	-0.0307462	0.000310442
J	9	Sample X225	12457	12427	12382	12336	12242	12158	12095	12087	12038	12030						-	5	3.68265	3.65222	3.60716	3.5618	3.47127	3.39272	3.33522	3.328	3.28419	3.2771	-0.000423248	3.71318	-0.000416323
K	9	Sample X249	11162	11056	11073	11060	10992	10992	10920	10896	11001	11012						-	5	2.60294	2.53173	2.54301	2.53438	2.48974	2.48974	2.44338	2.42812	2.4956	2.50278	-0.000101099	2.5668	-9.16438e-05
L	9	Sample X273	19295	19348	19263	19111	18946	18728	18634	18680	18820	19003						-	5	-35.765	-34.1199	-36.8432	-43.082	-53.021	-77.0858	-96.308	-85.8055	-64.6118	-49.083	-0.0384778	-34.4859	-0.038489
A	10	Sample X10	4828	4789	4866	4854	4747	4680	4733	4760	4797	4812						4ebp1-70-SGS	5	0.319618	0.312207	0.326882	0.324584	0.304273	0.291717	0.301639	0.306723	0.313724	0.316573	-1.00494e-05	0.317823	-2.56639e-06
B	10	Sample X34	3497	3442	3490	3509	3484	3367	3314	3319	3353	3356						4ebp1-70-SGS	5	0.0887936	0.080147	0.0876895	0.0906887	0.086744	0.0684592	0.0602704	0.0610405	0.0662904	0.0667548	-2.71783e-05	0.0919948	-1.86102e-05
C	10	Sample X58	3775	3670	3650	3625	3558	3400	3270	3296	3368	3440						4ebp1-70-SGS	5	0.133502	0.116416	0.113189	0.109168	0.098459	0.0735873	0.0535162	0.0575025	0.0686142	0.0798338	-6.50446e-05	0.129406	-6.16632e-05
D	10	Sample X82	3605	4444	5200	5697	6131	6676	7176	7514	7944	8254						L5A-PDZ	5	0.105961	0.248462	0.392539	0.496696	0.594628	0.727992	0.861872	0.959428	1.09277	1.196	0.000999184	0.0681243	0.000997893
E	10	Sample X106	3825	4700	5508	6092	6670	7332	7819	8260	8661	9068						L5A-PDZ	5	0.141726	0.295452	0.456131	0.585542	0.726456	0.906149	1.05288	1.19806	1.34165	1.50019	0.00125459	0.067668	0.00125752
F	10	Sample X130	3656	4453	5188	5890	6291	6791	7306	7745	8114	8467						L5A-PDZ	5	0.114156	0.250085	0.390122	0.539399	0.632522	0.757752	0.898682	1.02971	1.1486	1.27072	0.00106564	0.0637903	0.0010655
G	10	Sample X154	3210	3290	3301	3231	3103	3134	3163	3208	3241	3261						L5A-SGS	5	0.0443695	0.0565814	0.0582707	0.0475625	0.0282375	0.0328878	0.0372553	0.0440659	0.0490862	0.0521395	-4.03191e-06	0.0474648	1.33556e-06
H	10	Sample X178	3151	3232	3204	3155	3125	3139	3153	3164	3157	3165						L5A-SGS	5	0.0354461	0.0477148	0.0434588	0.0360488	0.0315358	0.0336396	0.0357474	0.0374063	0.0363503	0.0375572	-4.52599e-06	0.0402061	1.31185e-06
I	10	Sample X202	3425	3426	3406	3352	3180	3144	3166	3215	3241	3272						L5A-SGS	5	0.0774874	0.0776437	0.0745221	0.0661357	0.0398234	0.034392	0.0377081	0.0451289	0.0490862	0.0538224	-3.2857e-05	0.0752892	-4.31079e-05
J	10	Sample X226	6212	6112	6116	6103	6101	6120	6134	6151	6165	6163						PO4-std	5	0.613686	0.590194	0.591126	0.588099	0.587634	0.592059	0.595329	0.59931	0.602597	0.602127	2.5159e-06	0.594707	2.30099e-06
K	10	Sample X250	6249	6128	6085	6086	6078	6092	6073	6090	6128	6133						PO4-std	5	0.622477	0.593927	0.583917	0.584149	0.582295	0.585542	0.581137	0.585078	0.593927	0.595095	-1.24458e-05	0.598222	-1.85838e-05
L	10	Sample X274	1220	1196	1181	1175	1155	1142	1137	1127	1114	1101						PO4-std	5	-0.222517	-0.225356	-0.227126	-0.227833	-0.230187	-0.231714	-0.232301	-0.233474	-0.234996	-0.236516	-1.21282e-05	-0.222925	-2.16752e-05
A	11	Sample X11	4925	5481	6258	6893	7378	7803	8432	9011	9502	9951						IRSp53-PDZ	6	0.338241	0.450434	0.624624	0.784651	0.919446	1.04784	1.25822	1.47715	1.68546	1.89749	0.0014389	0.185017	0.00145512
B	11	Sample X35	3838	4336	4939	5474	5956	6402	6898	7352	7773	8116						IRSp53-PDZ	6	0.143873	0.229156	0.340951	0.448961	0.554309	0.659412	0.785982	0.911916	1.03843	1.14927	0.000943661	0.0600296	0.000959706
C	11	Sample X59	3788	4365	5021	5611	6116	6512	6906	7352	7740	8116						IRSp53-PDZ	6	0.135635	0.234311	0.35694	0.478088	0.591126	0.68656	0.788114	0.911916	1.02815	1.14927	0.000933332	0.0760116	0.000940405
D	11	Sample X83	3273	3246	3273	3251	3187	3138	3175	3202	3255	3293						IRSp53-SGS	6	0.0539755	0.0498488	0.0539755	0.0506118	0.0408826	0.0334892	0.0390675	0.0431554	0.0512227	0.0570419	-2.97531e-06	0.0491123	6.3142e-06
E	11	Sample X107	3203	3183	3199	3163	3079	3029	3037	3060	3106	3110						IRSp53-SGS	6	0.0433071	0.0402772	0.0427005	0.0372553	0.0246503	0.0172133	0.0184	0.0218185	0.0286867	0.0292859	-1.89766e-05	0.0417455	-1.31719e-05
F	11	Sample X131	3239	3270	3280	3237	3144	3040	3050	3071	3121	3143						IRSp53-SGS	6	0.0487813	0.0535162	0.0550478	0.0484765	0.034392	0.0188453	0.0203309	0.0234571	0.0309354	0.0342415	-2.76192e-05	0.0533739	-3.59178e-05
G	11	Sample X155	3254	3411	3525	3624	3721	3837	3986	4142	4291	4441						4ebp1-70-PDZ	6	0.0510699	0.0753017	0.0932202	0.109007	0.124684	0.143708	0.168597	0.195219	0.2212	0.247922	0.000176805	0.0369098	0.000182277
H	11	Sample X179	3219	3385	3510	3630	3726	3908	4093	4275	4434	4582						4ebp1-70-PDZ	6	0.0457369	0.0712535	0.0908467	0.109971	0.125498	0.155504	0.186794	0.218384	0.246662	0.273574	0.000210937	0.02586	0.00028079
I	11	Sample X203	2888	3054	3198	3321	3425	3530	3687	3848	4004	4159						4ebp1-70-PDZ	6	-0.00349857	0.0209257	0.0425489	0.0613486	0.0774874	0.0940125	0.119165	0.145528	0.171639	0.198155	0.000180543	-0.0155945	0.000179017
J	11	Sample X227	12789	12850	12834	12847	12756	12723	12597	12482	12412	12522						-	6	4.04166	4.1124	4.09369	4.10889	4.00404	3.96686	3.82891	3.70825	3.63712	3.74967	-0.000442378	4.19058	-0.000435453
K	11	Sample X251	11938	11884	11764	11683	11549	11428	11390	11514	11569	11590						-	6	3.19689	3.15088	3.05138	2.98627	2.882	2.79136	2.76355	2.85545	2.8973	2.91346	-0.000306284	3.13262	-0.000296828
L	11	Sample X275	14752	14370	14332	14698	15205	15282	15215	15092	15019	15021						-	6	7.54985	6.59026	6.50499	7.40174	8.99801	9.28786	9.03483	8.5981	8.35454	8.36106	0.00178311	6.99826	0.00177188
A	12	Sample X12	4251	4074	4175	4232	4177	3946	3960	4010	4038	4074						4ebp1-70-SGS	6	0.214171	0.183543	0.200926	0.210846	0.201272	0.161865	0.164217	0.172655	0.177406	0.183543	-3.22859e-05	0.206416	-2.48029e-05
B	12	Sample X36	3020	2969	3019	3057	2997	2889	2863	2891	2913	2918						4ebp1-70-SGS	6	0.0158799	0.00835309	0.0157318	0.021372	0.0124792	-0.00335301	-0.00713132	-0.00306185	0.000146011	0.000876352	-1.95854e-05	0.0178805	-1.10173e-05
C	12	Sample X60	2896	2967	2969	2936	2864	2795	2774	2769	2754	2775						4ebp1-70-SGS	6	-0.00233359	0.00805895	0.00835309	0.00350952	-0.00698624	-0.016953	-0.0199688	-0.0206856	-0.0228333	-0.0198253	-3.0266e-05	0.00919317	-2.68846e-05
D	12	Sample X84	3156	3695	4231	4682	5109	5499	5885	6263	6618	6940						L5A-PDZ	6	0.0361996	0.120462	0.210672	0.29209	0.37432	0.454229	0.538276	0.625818	0.713206	0.797208	0.000701641	-0.00473644	0.000700349
E	12	Sample X108	3406	3961	4508	4989	5371	5776	6181	6604	6979	7332						L5A-PDZ	6	0.0745221	0.164385	0.260046	0.350677	0.42747	0.514016	0.606362	0.709659	0.807708	0.906149	0.000762099	0.0248398	0.000765022
F	12	Sample X132	3389	3987	4653	5091	5453	5969	6370	6763	7116	7443						L5A-PDZ	6	0.0718754	0.168766	0.286693	0.370746	0.444551	0.557264	0.651608	0.750451	0.845173	0.93843	0.00079838	0.0295276	0.000798241
G	12	Sample X156	3001	3040	3040	2967	2897	2906	2941	2966	2985	3001						L5A-SGS	6	0.0130699	0.0188453	0.0188453	0.00805895	-0.00218789	-0.000875667	0.00424206	0.00791191	0.010709	0.0130699	-6.14945e-06	0.0128585	-7.81986e-07
H	12	Sample X180	2911	2980	2998	2963	2921	2941	2942	2962	2977	2986						L5A-SGS	6	-0.000145992	0.00997227	0.0126269	0.00747089	0.00131478	0.00424206	0.00438862	0.00732393	0.00953044	0.0108564	3.18661e-06	0.00484606	9.02446e-06
I	12	Sample X204	3315	3380	3353	3304	3202	3109	3115	3144	3174	3199						L5A-SGS	6	0.0604244	0.0704766	0.0662904	0.0587319	0.0431554	0.0291361	0.0300354	0.034392	0.0389164	0.0427005	-3.23251e-05	0.066821	-4.25761e-05
J	12	Sample X228	5218	5108	5101	5073	5081	5066	5056	5107	5106	5106						PO4-std	6	0.396173	0.374121	0.37273	0.367182	0.368765	0.365798	0.363824	0.373922	0.373723	0.373723	-1.07022e-05	0.379417	-1.09171e-05
K	12	Sample X252	5203	5067	5024	4963	4968	4968	4971	4981	4975	4982						PO4-std	6	0.393144	0.365996	0.357528	0.34561	0.346583	0.346583	0.347167	0.349116	0.347946	0.349311	-2.81939e-05	0.371815	-3.43319e-05
L	12	Sample X276	769	752	744	729	725	717	709	703	689	689						PO4-std	6	-0.274565	-0.276474	-0.277371	-0.279052	-0.279499	-0.280394	-0.281287	-0.281957	-0.283518	-0.283518	-8.10212e-06	-0.274902	-1.76491e-05
A	13	Sample X13	4484	4834	5406	5846	6061	6221	6750	7160	7516	7822						IRSp53-PDZ	7	0.255689	0.320763	0.434734	0.529547	0.578361	0.61582	0.747074	0.857402	0.960023	1.05382	0.000730373	0.197099	0.000746594
B	13	Sample X37	3454	3799	4254	4654	4982	5263	5580	5922	6244	6538						IRSp53-PDZ	7	0.0820281	0.137442	0.214697	0.286879	0.349311	0.405301	0.471442	0.546608	0.621286	0.693051	0.000563402	0.0427636	0.000579446
C	13	Sample X61	3381	3775	4220	4619	4957	5276	5606	5917	6215	6496						IRSp53-PDZ	7	0.070632	0.133502	0.208751	0.280394	0.344444	0.40795	0.477014	0.545479	0.614397	0.68258	0.000566202	0.036793	0.000573274
D	13	Sample X85	3167	3155	3173	3124	3049	3079	3108	3174	3195	3218						IRSp53-SGS	7	0.0378591	0.0360488	0.0387653	0.0313856	0.0201823	0.0246503	0.0289863	0.0389164	0.0420942	0.0455849	5.54925e-06	0.0311178	1.48388e-05
E	13	Sample X109	3163	3159	3158	3120	3031	3026	3053	3060	3077	3087						IRSp53-SGS	7	0.0372553	0.0366519	0.0365011	0.0307853	0.0175099	0.0167687	0.020777	0.0218185	0.0243519	0.0258448	-1.47967e-05	0.0357045	-8.9919e-06
F	13	Sample X133	3237	3265	3242	3213	3150	3095	3103	3093	3106	3140						IRSp53-SGS	7	0.0484765	0.0527512	0.0492387	0.0448251	0.0352954	0.0270405	0.0282375	0.0267415	0.0286867	0.0337901	-2.37946e-05	0.0517851	-3.20931e-05
G	13	Sample X157	3119	3220	3298	3339	3358	3413	3518	3603	3708	3811						4ebp1-70-PDZ	7	0.0306353	0.0458889	0.0578098	0.0641258	0.0670645	0.0756137	0.092112	0.105641	0.122571	0.139417	9.33069e-05	0.0241038	9.87788e-05
H	13	Sample X181	3015	3126	3217	3269	3310	3326	3407	3530	3633	3749						4ebp1-70-PDZ	7	0.0151397	0.0316859	0.0454329	0.0533632	0.0596548	0.0621194	0.074678	0.0940125	0.110453	0.129248	9.53361e-05	0.0103771	0.000165188
I	13	Sample X205	2716	2844	2946	3011	3054	3153	3260	3346	3443	3523						4ebp1-70-PDZ	7	-0.0282557	-0.00988434	0.00497507	0.0145479	0.0209257	0.0357474	0.0519867	0.0652076	0.0803037	0.0929035	0.000108588	-0.0323072	0.000107063
J	13	Sample X229	11866	11925	11997	12027	11914	11691	11464	11434	11565	11650						-	7	3.13572	3.18574	3.24806	3.27445	3.17634	2.99263	2.81799	2.79577	2.89423	2.9602	-0.000375492	3.27341	-0.000368567
K	13	Sample X253	10854	10959	10985	10966	10850	10752	10574	10516	10483	10577						-	7	2.40167	2.46838	2.48519	2.47289	2.39916	2.33865	2.23268	2.1992	2.18037	2.23442	-0.000289517	2.51497	-0.000280061
L	13	Sample X277	16711	17150	16984	16196	15826	16218	16481	16521	16623	16706						-	7	19.8699	28.5524	24.5712	14.3739	11.8563	14.5522	17.0239	17.465	18.687	19.7991	-0.00477678	21.5412	-0.00478801
A	14	Sample X14	3564	3534	3618	3704	3533	3476	3543	3547	3576	3591						4ebp1-70-SGS	7	0.099414	0.0946467	0.108045	0.121921	0.0944881	0.0854846	0.0960748	0.0967101	0.101326	0.103721	-2.91369e-06	0.101931	4.56927e-06
B	14	Sample X38	3034	2969	3018	3072	3064	2951	2880	2909	2905	2916						4ebp1-70-SGS	7	0.0179548	0.00835309	0.0155837	0.0236062	0.0224141	0.00570856	-0.00466233	-0.000437919	-0.00102155	0.000584158	-2.03827e-05	0.0210379	-1.18146e-05
C	14	Sample X62	2993	2978	3012	3021	2980	2896	2858	2895	2940	2950						4ebp1-70-SGS	7	0.0118888	0.0096777	0.0146959	0.0160279	0.00997227	-0.00233359	-0.00785646	-0.00247928	0.00409551	0.00556182	-1.34269e-05	0.0139812	-1.00455e-05
D	14	Sample X86	3194	3535	3909	4198	4386	4710	5024	5317	5591	5824						L5A-PDZ	7	0.0419427	0.0948053	0.155671	0.204919	0.238057	0.297324	0.357528	0.416339	0.473796	0.524647	0.000445339	0.0132995	0.000444048
E	14	Sample X110	3397	3825	4238	4578	4843	5170	5541	5868	6142	6396						L5A-PDZ	7	0.0731202	0.141726	0.211895	0.272839	0.322481	0.386505	0.463127	0.534464	0.597201	0.657945	0.000540378	0.0419036	0.000543301
F	14	Sample X134	3143	3572	3960	4206	4407	4774	5092	5373	5650	5881						L5A-PDZ	7	0.0342415	0.100689	0.164217	0.206311	0.241814	0.309367	0.370944	0.427884	0.486495	0.537378	0.000460033	0.0119141	0.000459894
G	14	Sample X158	2975	3053	3052	3004	2947	2933	2956	2977	3003	3004						L5A-SGS	7	0.00923599	0.020777	0.0206283	0.0135131	0.00512173	0.00307023	0.00644253	0.00953044	0.0133653	0.0135131	-4.65353e-06	0.0143119	7.13934e-07
H	14	Sample X182	2927	2988	2980	2966	2953	2944	2948	2977	2995	2999						L5A-SGS	7	0.00219216	0.0111513	0.00997227	0.00791191	0.00600209	0.00468181	0.00526841	0.00953044	0.012184	0.0127745	4.59646e-06	0.00540901	1.04343e-05
I	14	Sample X206	3114	3145	3097	2963	2919	2984	3010	3024	3045	3053						L5A-SGS	7	0.0298854	0.0345425	0.0273397	0.00747089	0.00102248	0.0105616	0.0144001	0.0164723	0.0195879	0.020777	-1.06398e-05	0.0245899	-2.08908e-05
J	14	Sample X230	4129	4077	4050	4018	4026	4013	4028	4036	4029	4034						PO4-std	7	0.192978	0.184055	0.179448	0.174011	0.175368	0.173163	0.175707	0.177066	0.175877	0.176726	-1.07341e-05	0.184881	-1.0949e-05
K	14	Sample X254	3988	3906	3885	3881	3872	3876	3869	3890	3900	3919						PO4-std	7	0.168935	0.15517	0.15167	0.151004	0.149508	0.150173	0.14901	0.152502	0.154169	0.157342	-5.68205e-06	0.157357	-1.18201e-05
L	14	Sample X278	6993	7016	7010	7019	7044	7058	7079	7074	7117	7105						PO4-std	7	0.811495	0.817736	0.816106	0.818552	0.825369	0.8292	0.834964	0.83359	0.84545	0.842131	3.08186e-05	0.808968	2.12716e-05
A	15	Sample X15	12307	12290	12645	11970	10888	11377	11696	11955	12116	12297						IRSp53-PDZ	8	3.53357	3.51714	3.88074	3.22452	2.42306	2.7541	2.99661	3.21153	3.35425	3.52389	-0.000248787	3.39121	-0.000232567
B	15	Sample X39	4195	4333	4635	4840	4826	4892	5190	5380	5585	5759						IRSp53-PDZ	8	0.204397	0.228624	0.283354	0.321908	0.319237	0.331875	0.390524	0.429334	0.472512	0.510271	0.000273154	0.185311	0.000289199
C	15	Sample X63	3315	3543	3804	4038	4234	4374	4564	4755	4928	5139						IRSp53-PDZ	8	0.0604244	0.0960748	0.138265	0.177406	0.211196	0.235915	0.27027	0.30578	0.338821	0.380298	0.000288837	0.0481429	0.00029591
D	15	Sample X87	3066	3062	3087	3071	3032	3008	3018	3060	3067	3101						IRSp53-SGS	8	0.022712	0.0221163	0.0258448	0.0234571	0.0176582	0.0141043	0.0155837	0.0218185	0.022861	0.0279382	2.49641e-07	0.0212596	9.53915e-06
E	15	Sample X111	3029	3038	3069	3035	2984	2961	2952	2969	2996	2996						IRSp53-SGS	8	0.0172133	0.0185484	0.023159	0.0181032	0.0105616	0.00717698	0.00585531	0.00835309	0.0123316	0.0123316	-1.01824e-05	0.0194728	-4.37761e-06
F	15	Sample X135	3157	3182	3179	3150	3063	2980	3011	3048	3070	3094						IRSp53-SGS	8	0.0363503	0.0401259	0.0396722	0.0352954	0.0222652	0.00997227	0.0145479	0.0200336	0.0233081	0.026891	-1.89691e-05	0.0382276	-2.72676e-05
G	15	Sample X159	2987	3048	3085	3097	3130	3160	3224	3290	3354	3400						4ebp1-70-PDZ	8	0.0110039	0.0200336	0.0255461	0.0273397	0.0322867	0.0368028	0.0464972	0.0565814	0.0664452	0.0735873	5.58231e-05	0.00611852	6.1295e-05
H	15	Sample X183	2893	2952	2952	2919	2969	3059	3120	3185	3233	3308						4ebp1-70-PDZ	8	-0.0027706	0.00585531	0.00585531	0.00102248	0.00835309	0.0216697	0.0307853	0.0405799	0.0478671	0.0593471	5.70389e-05	-0.0123669	0.000126891
I	15	Sample X207	2713	2754	2800	2831	2833	2813	2852	2929	2993	3037						4ebp1-70-PDZ	8	-0.0286826	-0.0228333	-0.0162338	-0.0117641	-0.0114751	-0.0143616	-0.008726	0.00248478	0.0118888	0.0184	3.87181e-05	-0.0313612	3.71924e-05
J	15	Sample X231	10677	10760	10767	10682	10552	10334	10298	10325	10420	10495						-	8	2.29339	2.34353	2.34781	2.29638	2.21992	2.09732	2.07772	2.0924	2.14487	2.1872	-0.000222322	2.34345	-0.000215397
K	15	Sample X255	9786	9850	9805	9709	9530	9420	9457	9502	9583	9609						-	8	1.81697	1.84783	1.82608	1.78045	1.69805	1.64907	1.66541	1.68546	1.72209	1.734	-0.000137578	1.82509	-0.000128122
L	15	Sample X279	14766	14855	14788	14446	14144	14266	14419	14507	14592	14656						-	8	7.589	7.84536	7.65115	6.76589	6.10624	6.36074	6.7027	6.91199	7.12366	7.2896	-0.000574612	7.3794	-0.000585841
A	16	Sample X16	3216	3076	3059	2962	2948	3019	3063	3093	3091	3122						4ebp1-70-SGS	8	0.0452809	0.0242027	0.0216697	0.00732393	0.00526841	0.0157318	0.0222652	0.0267415	0.0264425	0.0310854	-1.5876e-06	0.0235538	5.89536e-06
B	16	Sample X40	2937	2855	2864	2793	2657	2731	2788	2803	2813	2828						4ebp1-70-SGS	8	0.00365599	-0.00829131	-0.00698624	-0.0172406	-0.0366223	-0.0261184	-0.0179592	-0.015802	-0.0143616	-0.0121974	-1.11567e-05	-0.00849826	-2.58863e-06
C	16	Sample X64	3057	3016	3075	3092	3001	2894	2927	2964	2972	2977						4ebp1-70-SGS	8	0.021372	0.0152877	0.0240536	0.026592	0.0130699	-0.00262495	0.00219216	0.00761788	0.00879446	0.00953044	-1.63182e-05	0.0223794	-1.29368e-05
D	16	Sample X88	2794	3036	3249	3329	3360	3592	3824	4004	4161	4325						L5A-PDZ	8	-0.0170968	0.0182516	0.0503065	0.0625821	0.0673743	0.103881	0.141561	0.171639	0.198501	0.227207	0.000219222	-0.0291123	0.00021793
E	16	Sample X112	3207	3467	3618	3671	3923	4189	4388	4589	4766	4930						L5A-PDZ	8	0.0439141	0.0840693	0.108045	0.116577	0.158011	0.203355	0.238414	0.274862	0.307856	0.339208	0.000276217	0.021701	0.00027914
F	16	Sample X136	2947	3251	3456	3490	3663	3899	4100	4302	4465	4634						L5A-PDZ	8	0.00512173	0.0506118	0.0823419	0.0876895	0.115285	0.154002	0.187994	0.22314	0.252251	0.283169	0.00025038	-0.0060673	0.000250241
G	16	Sample X160	2885	2975	2962	2816	2741	2790	2811	2831	2842	2849						L5A-SGS	8	-0.00393512	0.00923599	0.00732393	-0.0139291	-0.0246913	-0.0176718	-0.0146498	-0.0117641	-0.0101737	-0.00916052	-1.38121e-05	-0.0006543	-8.44462e-06
H	16	Sample X184	2904	2965	2938	2922	2875	2855	2873	2885	2879	2908						L5A-SGS	8	-0.0011674	0.00776488	0.00380248	0.00146097	-0.00538907	-0.00829131	-0.00567964	-0.00393512	-0.00480772	-0.000583854	-7.36204e-06	0.00273464	-1.52419e-06
I	16	Sample X208	3113	3135	3131	3061	2964	2979	3012	3018	3044	3034						L5A-SGS	8	0.0297355	0.0330381	0.0324369	0.0219674	0.00761788	0.00982497	0.0146959	0.0155837	0.0194393	0.0179548	-1.54087e-05	0.0294747	-2.56596e-05
J	16	Sample X232	3480	3422	3409	3420	3420	3408	3424	3430	3431	3436						PO4-std	8	0.0861141	0.0770187	0.0749898	0.0767064	0.0767064	0.0748339	0.0773312	0.078269	0.0784254	0.0792077	-1.81381e-06	0.0790486	-2.02872e-06
K	16	Sample X256	3347	3294	3250	3247	3254	3246	3261	3277	3277	3290						PO4-std	8	0.0653622	0.0571954	0.0504592	0.0500013	0.0510699	0.0498488	0.0521395	0.0545881	0.0545881	0.0565814	-3.60813e-06	0.0563483	-9.74614e-06
L	16	Sample X280	6164	6190	6190	6215	6204	6233	6247	6261	6318	6322						PO4-std	8	0.602362	0.608485	0.608485	0.614397	0.611792	0.618669	0.622001	0.62534	0.639017	0.639982	3.36501e-05	0.598863	2.41031e-05
A	17	Sample X17	4254	4290	4581	4497	4370	4561	4785	4913	5037	5170						IRSp53-PDZ	9	0.214697	0.221024	0.273391	0.258047	0.235202	0.26972	0.311449	0.335922	0.360082	0.386505	0.000152882	0.194875	0.000169102
B	17	Sample X41	3192	3302	3498	3575	3579	3683	3798	3944	4069	4172						IRSp53-PDZ	9	0.0416397	0.0584244	0.0889514	0.101167	0.101805	0.118518	0.137278	0.161529	0.182688	0.200406	0.000140741	0.0347959	0.000156786
C	17	Sample X65	3241	3359	3523	3651	3680	3728	3886	4037	4162	4286						IRSp53-PDZ	9	0.0490862	0.0672194	0.0929035	0.11335	0.118032	0.125823	0.151836	0.177236	0.198674	0.22032	0.000151828	0.0403512	0.000158901
D	17	Sample X89	3094	3114	3104	3084	3041	2960	2963	2996	3036	3046						IRSp53-SGS	9	0.026891	0.0298854	0.0283872	0.0253967	0.0189938	0.00703005	0.00747089	0.0123316	0.0182516	0.0197364	-1.47398e-05	0.0282813	-5.45027e-06
E	17	Sample X113	3263	3193	3286	3299	3174	3169	3201	3243	3201	3229						IRSp53-SGS	9	0.0524453	0.0417912	0.0559677	0.0579634	0.0389164	0.0381611	0.0430038	0.0493911	0.0430038	0.0472581	-5.89464e-06	0.050327	-8.98641e-08
F	17	Sample X137	3225	3206	3195	3167	3090	3045	3050	3054	3077	3075						IRSp53-SGS	9	0.0466493	0.0437623	0.0420942	0.0378591	0.0262931	0.0195879	0.0203309	0.0209257	0.0243519	0.0240536	-2.54731e-05	0.0458746	-3.37716e-05
G	17	Sample X161	3113	3136	3139	3145	3083	3050	3077	3111	3162	3184						4ebp1-70-PDZ	9	0.0297355	0.0331885	0.0336396	0.0345425	0.0252474	0.0203309	0.0243519	0.0294358	0.0371045	0.0404285	3.39098e-06	0.0287659	8.86289e-06
H	17	Sample X185	2939	2970	2997	2969	2891	2879	2907	2984	3009	3057						4ebp1-70-PDZ	9	0.00394899	0.0085002	0.0124792	0.00835309	-0.00306185	-0.00480772	-0.00072977	0.0105616	0.0142522	0.021372	8.00449e-06	0.0022841	7.78567e-05
I	17	Sample X209	2685	2711	2735	2703	2652	2691	2741	2795	2834	2860						4ebp1-70-PDZ	9	-0.0326596	-0.0289672	-0.0255478	-0.0301046	-0.0373284	-0.0318086	-0.0246913	-0.016953	-0.0113306	-0.00756646	2.09105e-05	-0.037242	1.93847e-05
J	17	Sample X233	9264	9347	9367	9267	9012	8629	8563	8674	8736	8801						-	9	1.58165	1.61723	1.6259	1.58293	1.47755	1.32976	1.30547	1.34651	1.36985	1.39465	-0.000292513	1.63866	-0.000285588
K	17	Sample X257	8293	8324	8244	8101	7709	7536	7650	7725	7779	7858						-	9	1.20944	1.2202	1.19257	1.14426	1.01855	0.96599	1.00043	1.0235	1.04031	1.06522	-0.000196298	1.20583	-0.000186842
L	17	Sample X281	11502	11294	10883	10559	10710	10936	11020	11110	11147	11213						-	9	2.84641	2.69464	2.4199	2.22397	2.31319	2.4536	2.50802	2.56774	2.59274	2.63796	-4.33105e-05	2.5518	-5.45391e-05
A	18	Sample X18	2935	2983	2985	2969	3007	3040	3081	3067	3087	3105						4ebp1-70-SGS	9	0.00336307	0.0104143	0.010709	0.00835309	0.0139565	0.0188453	0.0249488	0.022861	0.0258448	0.028537	2.2728e-05	0.00314647	3.0211e-05
B	18	Sample X42	2864	2715	2645	2563	2589	2647	2692	2743	2754	2761						4ebp1-70-SGS	9	-0.00698624	-0.028398	-0.0383162	-0.0498222	-0.046187	-0.0380341	-0.0316667	-0.0244057	-0.0228333	-0.0218316	1.89481e-06	-0.031985	1.04629e-05
C	18	Sample X66	3386	3333	3355	3299	3155	3042	3071	3144	3170	3210						4ebp1-70-SGS	9	0.071409	0.0631993	0.0666	0.0579634	0.0360488	0.0191423	0.0234571	0.034392	0.0383121	0.0443695	-3.53046e-05	0.0666721	-3.19232e-05
D	18	Sample X90	2869	2933	3090	3242	3295	3213	3354	3458	3557	3648						L5A-PDZ	9	-0.00626054	0.00307023	0.0262931	0.0492387	0.057349	0.0448251	0.0664452	0.0826558	0.0982999	0.112867	0.000104023	-0.00893571	0.000102732
E	18	Sample X114	3151	3298	3423	3528	3547	3649	3763	3904	4019	4125						L5A-PDZ	9	0.0354461	0.0578098	0.0771749	0.0936955	0.0967101	0.113028	0.131537	0.154836	0.17418	0.192289	0.000138602	0.0295092	0.000141525
F	18	Sample X138	2872	3046	3183	3233	3251	3378	3495	3617	3730	3857						L5A-PDZ	9	-0.00582489	0.0197364	0.0402772	0.0478671	0.0506118	0.070166	0.088478	0.107884	0.126149	0.147019	0.000131308	-0.0095486	0.000131169
G	18	Sample X162	2809	2908	2892	2858	2792	2789	2827	2842	2850	2880						L5A-SGS	9	-0.014938	-0.000583854	-0.00291623	-0.00785646	-0.0173843	-0.0178155	-0.0123418	-0.0101737	-0.0090157	-0.00466233	-8.4429e-07	-0.00926222	4.52318e-06
H	18	Sample X186	2847	2785	2736	2739	2784	2825	2849	2879	2875	2870						L5A-SGS	9	-0.0094501	-0.0183901	-0.0254051	-0.0249769	-0.0185337	-0.0126306	-0.00916052	-0.00480772	-0.00538907	-0.00611534	1.4008e-05	-0.0218907	1.98459e-05
I	18	Sample X210	3233	3150	3036	2981	3006	3058	3084	3102	3108	3125						L5A-SGS	9	0.0478671	0.0352954	0.0182516	0.0101196	0.0138087	0.0215208	0.0253967	0.0280878	0.0289863	0.0315358	-4.46572e-06	0.0287664	-1.47167e-05
J	18	Sample X234	3171	3120	3098	3090	3090	3071	3093	3078	3093	3111						PO4-std	9	0.0384631	0.0307853	0.0274893	0.0262931	0.0262931	0.0234571	0.0267415	0.0245011	0.0267415	0.0294358	-6.36285e-06	0.0318378	-6.57776e-06
K	18	Sample X258	3103	3058	3029	3011	3006	3008	3006	2999	3010	3364						PO4-std	9	0.0282375	0.0215208	0.0172133	0.0145479	0.0138087	0.0141043	0.0138087	0.0127745	0.0144001	0.0679941	1.43357e-05	0.0132396	8.19771e-06
L	18	Sample X282	4992	4992	4991	5000	4997	5026	5025	5024	5047	5042						PO4-std	9	0.351262	0.351262	0.351067	0.352826	0.352239	0.357921	0.357725	0.357528	0.362051	0.361066	1.09309e-05	0.348936	1.38391e-06
A	19	Sample X19	4251	4313	4379	4430	4478	4546	4583	4552	4380	4379						IRSp53-PDZ	10	0.214171	0.225084	0.236807	0.245943	0.254603	0.266975	0.273758	0.268072	0.236986	0.236807	2.72314e-05	0.229582	4.3452e-05
B	19	Sample X43	3126	3146	3266	3400	3304	3306	3399	3487	3549	3616						IRSp53-PDZ	10	0.0316859	0.034693	0.0529041	0.0735873	0.0587319	0.0590394	0.0734316	0.0872167	0.0970279	0.107724	6.5257e-05	0.02845	8.13017e-05
C	19	Sample X67	3049	3108	3234	3330	3320	3278	3356	3472	3565	3636						IRSp53-PDZ	10	0.0201823	0.0289863	0.0480194	0.0627364	0.0611945	0.0547413	0.0667548	0.0848554	0.0995733	0.110935	7.57914e-05	0.0183231	8.28639e-05
D	19	Sample X91	2992	2994	3028	3044	2999	2912	2928	2967	2994	3015						IRSp53-SGS	10	0.0117413	0.0120364	0.0170651	0.0194393	0.0127745	0	0.00233846	0.00805895	0.0120364	0.0151397	-3.96576e-06	0.0134425	5.32375e-06
E	19	Sample X115	3087	3087	3124	3125	3072	2982	2933	2983	2997	3003						IRSp53-SGS	10	0.0258448	0.0258448	0.0313856	0.0315358	0.0236062	0.0102669	0.00307023	0.0104143	0.0124792	0.0133653	-2.06802e-05	0.0311894	-1.48754e-05
F	19	Sample X139	3105	3127	3162	3166	3105	3010	3003	3024	3054	3059						IRSp53-SGS	10	0.028537	0.0318361	0.0371045	0.0377081	0.028537	0.0144001	0.0133653	0.0164723	0.0209257	0.0216697	-1.65911e-05	0.0350102	-2.48897e-05
G	19	Sample X163	2917	2964	2988	3014	2997	2981	2994	3030	3057	3070						4ebp1-70-PDZ	10	0.000730246	0.00761788	0.0111513	0.0149917	0.0124792	0.0101196	0.0120364	0.0173616	0.021372	0.0233081	1.61265e-05	0.00344089	2.15984e-05
H	19	Sample X187	2882	2907	2921	2917	2840	2791	2822	2868	2876	2915						4ebp1-70-PDZ	10	-0.00437151	-0.00072977	0.00131478	0.000730246	-0.0104631	-0.0175281	-0.0130636	-0.00640571	-0.00524376	0.00043809	-3.80609e-06	-0.00324858	6.60461e-05
I	19	Sample X211	2539	2583	2597	2603	2587	2569	2596	2613	2642	2677						4ebp1-70-PDZ	10	-0.0531671	-0.047027	-0.045066	-0.0442246	-0.0464671	-0.0489844	-0.0452062	-0.0428207	-0.0387393	-0.0337932	1.20275e-05	-0.051766	1.05017e-05
J	19	Sample X235	6787	6843	6861	6850	6711	6526	6442	6496	6553	6601						-	10	0.756707	0.771405	0.77616	0.773252	0.736987	0.690052	0.669225	0.68258	0.696809	0.7089	-8.9866e-05	0.780127	-8.29407e-05
K	19	Sample X259	6304	6334	6325	6285	6174	6032	5950	5952	6005	6045						-	10	0.635646	0.64288	0.640706	0.631083	0.604713	0.571677	0.552947	0.5534	0.565482	0.57467	-9.06332e-05	0.6517	-8.11775e-05
L	19	Sample X283	9302	9347	9234	8599	8412	8665	8788	8861	8926	8961						-	10	1.59786	1.61723	1.56895	1.31867	1.25112	1.34315	1.38966	1.41784	1.44331	1.45717	-0.000148191	1.52941	-0.000159419
A	20	Sample X20	12269	12132	12246	11963	11448	11753	11831	11894	11892	12015						4ebp1-70-SGS	10	3.49698	3.36885	3.47506	3.21845	2.80612	3.04244	3.10648	3.15934	3.15765	3.26386	-0.000265388	3.36876	-0.000257905
B	20	Sample X44	2958	2900	2940	3010	2870	2819	2826	2866	2893	2899						4ebp1-70-SGS	10	0.00673625	-0.00175065	0.00409551	0.0144001	-0.00611534	-0.0134964	-0.0124862	-0.00669601	-0.0027706	-0.00189641	-1.14561e-05	0.00487569	-2.88802e-06
C	20	Sample X68	3172	3156	3140	3093	3074	3087	3108	3119	3140	3141						4ebp1-70-SGS	10	0.0386142	0.0361996	0.0337901	0.0267415	0.0239044	0.0258448	0.0289863	0.0306353	0.0337901	0.0339405	-3.3348e-06	0.0332455	4.66217e-08
D	20	Sample X92	2743	2828	2873	2891	2908	2964	3028	3086	3148	3219						L5A-PDZ	10	-0.0244057	-0.0121974	-0.00567964	-0.00306185	-0.000583854	0.00761788	0.0170651	0.0256954	0.0349942	0.0457369	5.99536e-05	-0.0274541	5.86622e-05
E	20	Sample X116	3139	3218	3288	3303	3230	3292	3380	3470	3517	3588						L5A-PDZ	10	0.0336396	0.0455849	0.0562745	0.0585781	0.0474103	0.0568884	0.0704766	0.0845409	0.0919538	0.103242	5.74499e-05	0.0303889	6.03728e-05
F	20	Sample X140	2836	2931	2965	2918	2941	3035	3107	3196	3257	3326						L5A-PDZ	10	-0.0110415	0.00277747	0.00776488	0.000876352	0.00424206	0.0181032	0.0288365	0.0422458	0.0515282	0.0621194	6.41338e-05	-0.017735	6.39945e-05
G	20	Sample X164	2871	2907	2911	2878	2843	2840	2859	2870	2880	2893						L5A-SGS	10	-0.00597012	-0.00072977	-0.000145992	-0.00495309	-0.010029	-0.0104631	-0.00771147	-0.00611534	-0.00466233	-0.0027706	-1.88324e-06	-0.00422514	3.48423e-06
H	20	Sample X188	2842	2907	2911	2909	2828	2831	2839	2859	2878	2874						L5A-SGS	10	-0.0101737	-0.00072977	-0.000145992	-0.000437919	-0.0121974	-0.0117641	-0.0106077	-0.00771147	-0.00495309	-0.00553436	-2.81375e-06	-0.0047373	3.0241e-06
I	20	Sample X212	3016	3082	3098	3113	3029	2962	2959	2990	3015	3028						L5A-SGS	10	0.0152877	0.0250981	0.0274893	0.0297355	0.0172133	0.00732393	0.00688314	0.0114463	0.0151397	0.0170651	-1.0726e-05	0.0237038	-2.09769e-05
J	20	Sample X236	2927	2897	2873	2878	2882	2876	2874	2885	2887	2905						PO4-std	10	0.00219216	-0.00218789	-0.00567964	-0.00495309	-0.00437151	-0.00524376	-0.00553436	-0.00393512	-0.00364411	-0.00102155	-1.66719e-06	-0.00243757	-1.8821e-06
K	20	Sample X260	2867	2849	2825	2815	2809	2809	2822	2815	2815	2821						PO4-std	10	-0.00655087	-0.00916052	-0.0126306	-0.0140733	-0.014938	-0.014938	-0.0130636	-0.0140733	-0.0140733	-0.0132079	-4.97407e-06	-0.00968647	-1.11121e-05
L	20	Sample X284	3625	3616	3634	3625	3628	3631	3657	3667	3648	3654						PO4-std	10	0.109168	0.107724	0.110614	0.109168	0.10965	0.110132	0.114317	0.115931	0.112867	0.113834	6.08627e-06	0.107689	-3.46073e-06
A	21	Sample X21	3248	3270	3366	3473	3488	3244	3220	3355	3429	3503						IRSp53-PDZ	11	0.0501539	0.0535162	0.0683041	0.0850126	0.0873743	0.0495437	0.0458889	0.0666	0.0781127	0.0897407	1.84209e-05	0.0563722	3.46415e-05
B	21	Sample X45	3090	3134	3209	3334	3265	3116	3202	3235	3290	3322						IRSp53-PDZ	11	0.0262931	0.0328878	0.0442177	0.0633537	0.0527512	0.0301853	0.0431554	0.0481718	0.0565814	0.0615027	2.11794e-05	0.0332024	3.72241e-05
C	21	Sample X69	3118	3152	3235	3318	3260	3110	3169	3249	3297	3334						IRSp53-PDZ	11	0.0304853	0.0355967	0.0481718	0.0608864	0.0519867	0.0292859	0.0381611	0.0503065	0.0576561	0.0633537	1.86883e-05	0.035376	2.57608e-05
D	21	Sample X93	6811	6841	6852	6759	6681	6788	7040	7013	7029	7184						IRSp53-SGS	11	0.762988	0.770878	0.773781	0.749411	0.729274	0.756968	0.824276	0.816921	0.821275	0.864113	8.74188e-05	0.734537	9.67083e-05
E	21	Sample X117	3151	3156	3171	3170	3129	3110	3088	3112	3127	3151						IRSp53-SGS	11	0.0354461	0.0361996	0.0384631	0.0383121	0.0321365	0.0292859	0.0259942	0.0295856	0.0318361	0.0354461	-5.79476e-06	0.0367474	1.00209e-08
F	21	Sample X141	3105	3112	3136	3128	3103	3055	3045	3056	3078	3098						IRSp53-SGS	11	0.028537	0.0295856	0.0331885	0.0319863	0.0282375	0.0210745	0.0195879	0.0212232	0.0245011	0.0274893	-7.53563e-06	0.0310625	-1.58342e-05
G	21	Sample X165	2924	2955	2976	2975	2956	2920	2936	2959	2975	2998						4ebp1-70-PDZ	11	0.00175339	0.0062957	0.00938321	0.00923599	0.00644253	0.00116862	0.00350952	0.00688314	0.00923599	0.0126269	4.21664e-06	0.00412351	9.68855e-06
H	21	Sample X189	3654	3631	3627	3605	3614	3608	3607	3601	3611	3596						4ebp1-70-PDZ	11	0.113834	0.110132	0.109489	0.105961	0.107403	0.106441	0.106281	0.105321	0.106922	0.104521	-6.42049e-06	0.111483	6.34317e-05
I	21	Sample X213	1791	1805	1813	1786	1740	1743	1761	1796	1806	1816						4ebp1-70-PDZ	11	-0.152533	-0.150756	-0.149739	-0.153167	-0.15898	-0.158602	-0.15633	-0.151898	-0.150629	-0.149358	4.82624e-07	-0.153489	-1.04314e-06
J	21	Sample X237	5311	5301	5246	5187	5190	5210	5226	5256	5254	5280						-	11	0.415108	0.413059	0.401845	0.38992	0.390524	0.394556	0.397791	0.403877	0.40347	0.408766	-4.36349e-06	0.40451	2.56182e-06
K	21	Sample X261	4462	4515	4572	4538	4367	4133	4126	4190	4244	4265						-	11	0.251709	0.261319	0.271738	0.265513	0.234667	0.193667	0.192461	0.203529	0.212945	0.216627	-6.34123e-05	0.268465	-5.39566e-05
L	21	Sample X285	6831	6723	6554	6570	6674	6730	6747	6771	6799	6828						-	11	0.768243	0.740083	0.69706	0.70108	0.72748	0.741893	0.746295	0.752534	0.759844	0.767454	2.82145e-05	0.723268	1.69859e-05
A	22	Sample X22	2981	3050	3138	3089	3007	3075	3093	3114	3119	3116						4ebp1-70-SGS	11	0.0101196	0.0203309	0.0334892	0.0261436	0.0139565	0.0240536	0.0267415	0.0298854	0.0306353	0.0301853	1.24542e-05	0.0170815	1.99372e-05
B	22	Sample X46	2734	2687	2772	2839	2680	2676	2673	2697	2723	2727						4ebp1-70-SGS	11	-0.0256905	-0.032376	-0.0202555	-0.0106077	-0.0333682	-0.0339348	-0.0343596	-0.0309569	-0.0272588	-0.0266888	-4.97441e-06	-0.024565	3.59368e-06
C	22	Sample X70	3102	3018	2986	3018	3036	3056	3078	3077	3082	3093						4ebp1-70-SGS	11	0.0280878	0.0155837	0.0108564	0.0155837	0.0182516	0.0212232	0.0245011	0.0243519	0.0250981	0.0267415	7.66085e-06	0.0164314	1.10423e-05
D	22	Sample X94	2732	2702	2721	2821	2774	2902	2935	2885	2854	2866						L5A-PDZ	11	-0.0259758	-0.0302467	-0.0275437	-0.0132079	-0.0199688	-0.00145907	0.00336307	-0.00393512	-0.00843623	-0.00669601	2.58817e-05	-0.0289396	2.45903e-05
E	22	Sample X118	3029	3074	3146	3068	3026	3078	3144	3176	3228	3259						L5A-PDZ	11	0.0172133	0.0239044	0.034693	0.02301	0.0167687	0.0245011	0.034392	0.0392187	0.0471059	0.0518338	2.7197e-05	0.0149459	3.01199e-05
F	22	Sample X142	2470	2499	2554	2542	2577	2622	2658	2703	2727	2752						L5A-PDZ	11	-0.0627272	-0.0587194	-0.0510778	-0.0527496	-0.0478663	-0.0415557	-0.036481	-0.0301046	-0.0266888	-0.0231194	3.74074e-05	-0.0655534	3.72682e-05
G	22	Sample X166	3106	3174	3196	3176	3160	3105	3095	3105	3117	3134						L5A-SGS	11	0.0286867	0.0389164	0.0422458	0.0392187	0.0368028	0.028537	0.0270405	0.028537	0.0303353	0.0328878	-6.84859e-06	0.0374299	-1.48112e-06
H	22	Sample X190	2799	2828	2820	2830	2805	2801	2817	2816	2854	2847						L5A-SGS	11	-0.0163777	-0.0121974	-0.0133521	-0.0119085	-0.0155141	-0.0160899	-0.0137849	-0.0139291	-0.00843623	-0.0094501	4.01954e-06	-0.0155157	9.85739e-06
I	22	Sample X214	3019	3065	3131	3089	2985	2968	2987	3006	3016	3041						L5A-SGS	11	0.0157318	0.022563	0.0324369	0.0261436	0.010709	0.00820601	0.0110039	0.0138087	0.0152877	0.0189938	-8.2138e-06	0.0224167	-1.84647e-05
J	22	Sample X238	2901	2867	2836	2836	2838	2827	2829	2831	2829	2844						PO4-std	11	-0.00160487	-0.00655087	-0.0110415	-0.0110415	-0.0107523	-0.0123418	-0.012053	-0.0117641	-0.012053	-0.00988434	-6.1246e-06	-0.00623396	-6.33951e-06
K	22	Sample X262	2891	2840	2831	2805	2808	2799	2795	2800	2817	2815						PO4-std	11	-0.00306185	-0.0104631	-0.0117641	-0.0155141	-0.015082	-0.0163777	-0.016953	-0.0162338	-0.0137849	-0.0140733	-7.59174e-06	-0.00877572	-1.37297e-05
L	22	Sample X286	3880	3867	3885	3891	3902	3930	3912	3932	3927	3961						PO4-std	11	0.150838	0.148678	0.15167	0.152669	0.154502	0.159182	0.156172	0.159517	0.15868	0.164385	1.24427e-05	0.148164	2.89574e-06
A	23	Sample X23	3271	3281	3361	3366	3081	3099	3172	3190	3216	3246						IRSp53-PDZ	12	0.0536693	0.055201	0.0675292	0.0683041	0.0249488	0.0276389	0.0386142	0.0413368	0.0452809	0.0498488	-1.62206e-05	0.0569695	0
B	23	Sample X47	3203	3181	3264	3308	3136	3062	3089	3124	3146	3156						IRSp53-PDZ	12	0.0433071	0.0399747	0.0525982	0.0593471	0.0331885	0.0221163	0.0261436	0.0313856	0.034693	0.0361996	-1.60447e-05	0.0475222	0
C	23	Sample X71	3026	3037	3069	3045	2929	2933	2947	2987	3016	3015						IRSp53-PDZ	12	0.0167687	0.0184	0.023159	0.0195879	0.00248478	0.00307023	0.00512173	0.0110039	0.0152877	0.0151397	-7.07249e-06	0.0172458	0
D	23	Sample X95	3211	3205	3228	3227	3149	3136	3142	3160	3189	3156						IRSp53-SGS	12	0.0445214	0.0436106	0.0471059	0.0469537	0.0351448	0.0331885	0.034091	0.0368028	0.0411854	0.0361996	-9.28951e-06	0.045454	0
E	23	Sample X119	3103	3097	3090	3007	2974	2996	3010	3043	3056	3072						IRSp53-SGS	12	0.0282375	0.0273397	0.0262931	0.0139565	0.00908879	0.0123316	0.0144001	0.0192908	0.0212232	0.0236062	-5.80478e-06	0.0230596	0
F	23	Sample X143	3095	3086	3043	3000	3002	3047	3087	3102	3115	3128						IRSp53-SGS	12	0.0270405	0.0256954	0.0192908	0.0129222	0.0132176	0.019885	0.0258448	0.0280878	0.0300354	0.0319863	8.29857e-06	0.0184214	0
G	23	Sample X167	3079	3083	3115	3111	2982	2997	3029	3057	3064	3071						4ebp1-70-PDZ	12	0.0246503	0.0252474	0.0300354	0.0294358	0.0102669	0.0124792	0.0172133	0.021372	0.0224141	0.0234571	-5.47191e-06	0.0249403	0
H	23	Sample X191	3323	3270	2822	2678	2664	2678	2706	2722	2730	2749						4ebp1-70-PDZ	12	0.0616569	0.0535162	-0.0130636	-0.0336516	-0.0356329	-0.0336516	-0.0296782	-0.0274013	-0.026261	-0.0235483	-6.98522e-05	0.0311398	0
I	23	Sample X215	2596	2628	2597	2559	2557	2580	2595	2605	2610	2615						4ebp1-70-PDZ	12	-0.0452062	-0.0407115	-0.045066	-0.0503804	-0.0506594	-0.0474467	-0.0453464	-0.0439439	-0.043242	-0.0425397	1.52577e-06	-0.0463697	0
J	23	Sample X239	2521	2568	2576	2552	2473	2471	2490	2497	2504	2526						-	12	-0.0556691	-0.0491241	-0.0480061	-0.0513566	-0.0623133	-0.0625892	-0.0599648	-0.0589963	-0.0580269	-0.0549747	-6.92531e-06	-0.0519469	0
K	23	Sample X263	2265	2288	2339	2363	2317	2253	2223	2222	2237	2269						-	12	-0.0906439	-0.0875474	-0.0806495	-0.0773881	-0.0836305	-0.0922559	-0.0962754	-0.0964091	-0.0944015	-0.090106	-9.45567e-06	-0.0832573	0
L	23	Sample X287	3615	3562	3518	3537	3584	3606	3610	3626	3621	3637						-	12	0.107563	0.0990956	0.092112	0.0951225	0.102603	0.106121	0.106762	0.109329	0.108526	0.111096	1.12286e-05	0.0970959	0
A	24	Sample X24	3103	3090	3135	2926	2968	2994	3016	3034	3039	3056						4ebp1-70-SGS	12	0.0282375	0.0262931	0.0330381	0.00204589	0.00820601	0.0120364	0.0152877	0.0179548	0.0186968	0.0212232	-7.48296e-06	0.0227917	0
B	24	Sample X48	2756	2642	2751	2740	2586	2631	2646	2659	2673	2677						4ebp1-70-SGS	12	-0.0225472	-0.0387393	-0.0232624	-0.0248341	-0.0466071	-0.0402892	-0.0381751	-0.0363397	-0.0343596	-0.0337932	-8.5681e-06	-0.0287538	0
C	24	Sample X72	3141	3133	3159	3000	3034	3061	3084	3085	3120	3112						4ebp1-70-SGS	12	0.0339405	0.0327375	0.0366519	0.0129222	0.0179548	0.0219674	0.0253967	0.0255461	0.0307853	0.0295856	-3.38142e-06	0.0287777	0
D	24	Sample X96	2769	2769	2794	2718	2732	2755	2756	2768	2773	2785						L5A-PDZ	12	-0.0206856	-0.0206856	-0.0170968	-0.0279709	-0.0259758	-0.0226903	-0.0225472	-0.0208289	-0.0201122	-0.0183901	1.2914e-06	-0.0224732	0
E	24	Sample X120	2849	2863	2926	2796	2762	2786	2823	2842	2850	2850						L5A-PDZ	12	-0.00916052	-0.00713132	0.00204589	-0.0168092	-0.0216884	-0.0182465	-0.0129193	-0.0101737	-0.0090157	-0.0090157	-2.92291e-06	-0.00945769	0
F	24	Sample X144	2538	2531	2550	2510	2487	2507	2516	2527	2541	2541						L5A-PDZ	12	-0.0533063	-0.0542799	-0.0516353	-0.0571953	-0.0603796	-0.0576112	-0.0563631	-0.0548358	-0.0528888	-0.0528888	1.39275e-07	-0.055222	0
G	24	Sample X168	3373	3508	3540	3296	3317	3344	3372	3392	3415	3425						L5A-SGS	12	0.0693899	0.0905306	0.0955986	0.0575025	0.0607324	0.0648984	0.0692347	0.072342	0.0759258	0.0774874	-5.36747e-06	0.0765847	0
H	24	Sample X192	3092	3197	3252	3012	2982	3032	3074	3095	3122	3127						L5A-SGS	12	0.026592	0.0423973	0.0507645	0.0146959	0.0102669	0.0176582	0.0239044	0.0270405	0.0310854	0.0318361	-5.83785e-06	0.0311268	0
I	24	Sample X216	3444	3474	3494	3505	3518	3518	3524	3524	3519	3529						L5A-SGS	12	0.0804603	0.0851699	0.0883203	0.0900566	0.092112	0.092112	0.0930619	0.0930619	0.0922703	0.093854	1.02509e-05	0.0838973	0
J	24	Sample X240	3014	3028	2995	2990	2985	2989	2996	3007	3014	3019						PO4-std	12	0.0149917	0.0170651	0.012184	0.0114463	0.010709	0.0112988	0.0123316	0.0139565	0.0149917	0.0157318	2.14909e-07	0.0133417	0
K	24	Sample X264	2692	2681	2717	2732	2709	2725	2709	2723	2742	2742						PO4-std	12	-0.0316667	-0.0332265	-0.0281133	-0.0259758	-0.0292516	-0.0269738	-0.0292516	-0.0272588	-0.0245485	-0.0245485	6.13801e-06	-0.0317643	0
L	24	Sample X288	4219	4196	4203	4202	4206	4210	4238	4232	4256	4264						PO4-std	12	0.208577	0.204571	0.205789	0.205615	0.206311	0.207008	0.211895	0.210846	0.215048	0.216451	9.547e-06	0.203483	0
[truncated: 9 more columns]
