# Supplementary material for: PDZ-directed substrate recruitment is the primary determinant of specific 4E-BP1 dephosphorylation by PP1-Neurabin
Source: eLife journal article supplement (doi:10.7554/elife.103403), 2024-11-20
Supplement: fig5-data1 [file Peptides with 0.2nM PP1-NEB.xlsx]

## Sheet: All Cycles
Well Row	Well Col	Content	Raw Data (420-10/455-20)	Raw Data (425-10/460-20)	Raw Data (425-10/460-20)	Raw Data (425-10/460-20)	Raw Data (425-10/460-20)	Raw Data (425-10/460-20)	Raw Data (425-10/460-20)	Raw Data (425-10/460-20)	Raw Data (425-10/460-20)	Raw Data (425-10/460-20)	Raw Data (425-10/460-20)							Well Col
		Time [s]	0	0	120	240	360	480	600	720	840	960	1080			200	11732.4	11765.5			60	180	300	420	540	660	780	900	1020	1140	Rates	const…	Norm. rate			IRSp53-PDZ			IRSp53-SGS			4ebp1-70-PDZ			4ebp1-70-SGS			L5A-PDZ
A	1	Sample X1		7784	8987	10256	11299	12153	12969	13710	14457	15189	15590			100	10364.8	10191.7	IRSp53-PDZ	1	1.04188	1.46753	2.05507	2.69819	3.38811	4.2551	5.31135	6.79189	8.9396	10.6139	0.00862846	-0.52081	0.00863329		200	0.00863329	0.00322193	0.00300168	0.000383683	0.000127336	8.45434e-05	2.03124e-05	0.00359326	0.000588575	-1.59264e-05	7.90979e-05	0.0001756	0.00286545	0.00330002
B	1	Sample X25		6680	7692	8716	9562	10327	10948	11507	12038	12535	12921			50	8097.1	8011.6	IRSp53-PDZ	1	0.729018	1.01331	1.36229	1.71253	2.09349	2.4613	2.85017	3.28419	3.76326	4.19678	0.00322473	0.411793	0.00322193		100	0.0129154	0.00335489	0.00285178	0.000170157	3.71406e-05	2.4899e-05	0.00139008	1.40348e-05	0.00203417	-2.30156e-05	-1.63145e-05	7.64399e-05	0.00323725	0.00311463
C	1	Sample X49		6465	7368	8320	9133	9893	10566	11150	11736	12212	12649			25	6285.5	5980.4	IRSp53-PDZ	1	0.674898	0.916546	1.21881	1.52682	1.86882	2.22803	2.59477	3.02869	3.44297	3.8851	0.00298935	0.344934	0.00300168		50	0.0101969	0.00284667	0.00244423	9.44422e-05	1.5071e-05	2.65685e-05	0.000667156	0.000495145	0.000806103	-1.52219e-05	-1.64173e-05	5.92157e-05	0.00247602	0.0025493
D	1	Sample X73		4308	4584	4825	5064	5254	5477	5640	5872	6076	6292			12.5	4732.1	4593.6	IRSp53-SGS	1	0.2242	0.273942	0.319047	0.365403	0.40347	0.449592	0.484334	0.53536	0.581831	0.632762	0.000369534	0.205274	0.000383683		25	0.00692915	0.0024827	0.00226403	4.35768e-05	2.12485e-05	2.48822e-05	0.0007218	0.00029689	0.000477718	-2.23581e-07	1.94542e-06	1.69191e-05	0.00266399	0.00216713
E	1	Sample X97		3910	4048	4140	4206	4299	4346	4389	4480	4620	4776			6.25	3643	3531.3	IRSp53-SGS	1	0.155838	0.179108	0.194874	0.206311	0.222611	0.230931	0.238593	0.254965	0.280579	0.309746	0.000126318	0.151565	0.000127336		12.5	0.00449508	0.00187654	0.00161951	2.63977e-05	4.04227e-06	1.12433e-05	0.000454408	0.000505225	0.000306442	8.47525e-06	-2.10629e-06	2.055e-05	0.00164844	0.00165584
F	1	Sample X121		3068	3170	3234	3311	3365	3424	3464	3519	3595	3650			3.125	3032.8	3037.3	IRSp53-SGS	1	0.02301	0.0383121	0.0480194	0.0598087	0.0681491	0.0773312	0.0835979	0.0922703	0.104361	0.113189	7.95836e-05	0.0230547	8.45434e-05		6.25	0.00213148	0.00116095	0.00108028	-2.96734e-06	-1.1729e-06	8.27515e-06	0.000340242	0.000322097	0.000220893	-2.84935e-05	-2.3018e-05	-9.0301e-06	0.00112123	0.00113019
G	1	Sample X145		74	79	84	85	89	89	93	98	97	102			1.5625	2711.6	2748	4ebp1-70-PDZ	1	-0.349719	-0.349199	-0.348679	-0.348575	-0.348158	-0.348158	-0.347741	-0.34722	-0.347324	-0.346803	2.48329e-06	-0.349648	2.03124e-05		3.125	0.00106683	0.000653111	0.000483642	2.48418e-05	-7.52334e-06	6.58434e-06	0.00018464	0.000156302	0.000128656	-1.7626e-05	-5.7614e-06	1.22555e-06	0.000667177	0.000705602
H	1	Sample X169		6772	7508	8191	8943	9701	10566	11340	12055	12707	13269			0.78125	1975.1	2427.7	4ebp1-70-PDZ	1	0.752794	0.957642	1.17451	1.45003	1.77669	2.22803	2.72742	3.29931	3.949	4.64501	0.00357964	0.148257	0.00359326		1.5625	0.000484485	0.000353977	0.000351246	2.07474e-05	3.99589e-06	-2.37903e-06	0.000106669	9.98826e-05	8.41752e-05	-3.85871e-06	3.28807e-06	2.43465e-05	0.000386995	0.000396343
I	1	Sample X193		4223	4708	5167	5545	5708	5898	6206	6581	6897	7234			0.390625	2291.4	2399.8	4ebp1-70-PDZ	1	0.209275	0.296949	0.385903	0.463978	0.499095	0.541197	0.612266	0.70385	0.785715	0.878188	0.000581732	0.188603	0.000588575		0.78125	0.000228415	0.000179796	0.0001854	1.30666e-05	-4.95954e-06	-1.72137e-05	6.38616e-05	3.26423e-05	4.57485e-05	-1.32669e-05	1.31358e-05	1.65657e-05	0.000188865	0.000192393
J	1	Sample X217		54	55	57	54	59	57	61	59	62	60			0.195312	2290.1	2361.9	PYGM15	1	-0.351797	-0.351694	-0.351486	-0.351797	-0.351278	-0.351486	-0.351071	-0.351278	-0.350967	-0.351174	6.92131e-07	-0.351818	3.5136e-05		0.390625	0.000121091	0.000104354	0.000108845	-2.27016e-06	-2.28873e-05	-1.69309e-05	4.60127e-05	3.39794e-05	2.4845e-05	-1.36295e-05	4.69555e-05	7.77505e-06	0.000120452	0.000115994
K	1	Sample X241		7171	7303	7434	7516	7635	7742	8016	8189	8251	8308			0	2154.5	2333.8	PYGM15	1	0.860474	0.897822	0.935788	0.960023	0.995859	1.02877	1.11619	1.17383	1.19497	1.21464	0.000351474	0.826953	0.000363745		0.195312	5.65113e-05	3.74797e-05	5.42436e-05	3.51131e-06	-3.44892e-07	9.34463e-06	2.23586e-05	1.49309e-05	1.31015e-05	-1.62374e-05	2.31245e-06	1.77016e-05	6.12798e-05	5.11129e-05
L	1	Sample X265		67	68	64	68	66	70	68	67	70	68						PYGM15	1	-0.350447	-0.350343	-0.350759	-0.350343	-0.350551	-0.350135	-0.350343	-0.350447	-0.350135	-0.350343	2.20457e-07	-0.350517	6.24944e-06		0	0	0	0	0	0	0	0	0	0	0	0	0	0	0
A	2	Sample X2		61	63	63	62	64	62	62	64	63	62						4ebp1-70-SGS	1	-0.351071	-0.350863	-0.350863	-0.350967	-0.350759	-0.350967	-0.350967	-0.350759	-0.350863	-0.350967	6.29513e-08	-0.350942	-1.59264e-05
B	2	Sample X26		3533	3544	3554	3593	3658	3749	3848	3910	3974	4013						4ebp1-70-SGS	1	0.0944881	0.0962336	0.0978228	0.104041	0.114479	0.129248	0.145528	0.155838	0.166574	0.173163	8.23112e-05	0.0783548	7.90979e-05		*1000000
C	2	Sample X50		4193	4307	4433	4550	4644	4735	4831	4975	5081	5201						4ebp1-70-SGS	1	0.20405	0.224023	0.246482	0.267706	0.285022	0.302015	0.32019	0.347946	0.368765	0.39274	0.000171372	0.193071	0.0001756			IRSp53-PDZ			IRSp53-SGS			4ebp1-70-PDZ			4ebp1-70-SGS			L5A-PDZ
D	2	Sample X74		6409	7604	8643	9455	10133	10716	11231	11696	12164	12557						L5A-PDZ	1	0.661124	0.986446	1.33495	1.66452	1.9901	2.31681	2.65045	2.99661	3.39826	3.78639	0.00285873	0.463327	0.00286545		200	0.517997	0.193316	0.180101	0.023021	0.00764017	0.0050726	0.00121874	0.215596	0.0353145	-0.000955586	0.00474588	0.010536	0.171927	0.198001
E	2	Sample X98		6837	8127	9148	9940	10631	11253	11798	12259	12669	13053						L5A-PDZ	1	0.769823	1.15295	1.53302	1.89202	2.26607	2.66579	3.0792	3.48743	3.90698	4.35975	0.00329904	0.531881	0.00330002		100	0.774926	0.201293	0.171107	0.0102094	0.00222844	0.00149394	0.083405	0.000842087	0.12205	-0.00138094	-0.000978868	0.0045864	0.194235	0.186878
F	2	Sample X122		6475	7460	8305	9023	9708	10275	10832	11310	11686	12069						L5A-PDZ	1	0.677372	0.943432	1.2136	1.48198	1.77998	2.06529	2.38793	2.706	2.98865	3.31182	0.00244908	0.486158	0.00245336		50	0.611815	0.1708	0.146654	0.00566653	0.000904262	0.00159411	0.0400294	0.0297087	0.0483662	-0.000913314	-0.000985038	0.00355294	0.148561	0.152958
G	2	Sample X146		4156	4205	4253	4278	4360	4414	4476	4531	4588	4671						L5A-SGS	1	0.197637	0.206137	0.214522	0.218912	0.233421	0.243069	0.254241	0.264235	0.274678	0.29004	8.46273e-05	0.188913	8.16124e-05		25	0.415749	0.148962	0.135842	0.00261461	0.00127491	0.00149293	0.043308	0.0178134	0.0286631	-1.34148e-05	0.000116725	0.00101515	0.15984	0.130028
H	2	Sample X170		3095	3151	3169	3220	3243	3269	3297	3322	3348	3366						L5A-SGS	1	0.0270405	0.0354461	0.0381611	0.0458889	0.0493911	0.0533632	0.0576561	0.0615027	0.0655169	0.0683041	3.72652e-05	0.027868	3.68254e-05		12.5	0.269705	0.112592	0.0971703	0.00158386	0.000242536	0.000674596	0.0272645	0.0303135	0.0183865	0.000508515	-0.000126377	0.001233	0.0989062	0.0993505
I	2	Sample X194		5009	5140	5226	5288	5387	5445	5514	5599	5696	5753						L5A-SGS	1	0.354587	0.380498	0.397791	0.4104	0.430786	0.442875	0.4574	0.475511	0.496479	0.508951	0.000138527	0.352412	0.000135922		6.25	0.127889	0.069657	0.0648169	-0.000178041	-7.03738e-05	0.000496509	0.0204145	0.0193258	0.0132536	-0.00170961	-0.00138108	-0.000541806	0.0672739	0.0678112
J	2	Sample X218		11392	11586	11637	11706	11761	11763	11819	11837	11890	11933						PO4-std	1	2.765	2.91037	2.95	3.00459	3.04894	3.05057	3.09653	3.11147	3.15595	3.19259	0.000335967	2.82702	0.000331091		3.125	0.0640096	0.0391866	0.0290185	0.00149051	-0.000451401	0.000395061	0.0110784	0.00937811	0.00771939	-0.00105756	-0.000345684	7.35331e-05	0.0400306	0.0423361
K	2	Sample X242		11502	11444	11602	11687	11762	11830	11878	11953	11967	12030						PO4-std	1	2.84641	2.80316	2.92274	2.98945	3.04975	3.10565	3.14582	3.20981	3.22192	3.2771	0.000442825	2.79148	0.000435128		1.5625	0.0290691	0.0212386	0.0210747	0.00124484	0.000239754	-0.000142742	0.00640014	0.00599296	0.00505051	-0.000231522	0.000197284	0.00146079	0.0232197	0.0237806
L	2	Sample X266		9539	9447	9693	9896	10093	10170	10221	10280	10372	10408						PO4-std	1	1.70211	1.66098	1.77294	1.8703	1.96939	2.00944	2.03638	2.06798	2.1182	2.13817	0.000461546	1.65766	0.000473029		0.78125	0.0137049	0.0107878	0.011124	0.000783994	-0.000297572	-0.00103282	0.0038317	0.00195854	0.00274491	-0.000796017	0.000788145	0.000993945	0.0113319	0.0115436
A	3	Sample X3		7383	8632	10078	11206	12337	13430	14349	15112	15793	16392						IRSp53-PDZ	2	0.920899	1.33087	1.96168	2.63313	3.56278	4.8742	6.54293	8.66679	11.6684	16.1099	0.0129106	-1.9192	0.0129154		0.390625	0.00726546	0.00626122	0.00653069	-0.000136209	-0.00137324	-0.00101585	0.00276076	0.00203877	0.0014907	-0.000817771	0.00281733	0.000466503	0.00722709	0.00695966
B	3	Sample X27		5862	6956	8063	9001	9846	10616	11382	11910	12394	12857						IRSp53-PDZ	2	0.533121	0.801507	1.13166	1.47313	1.84588	2.25724	2.75773	3.17293	3.61911	4.12062	0.00335769	0.156679	0.00335489		0.195312	0.00339068	0.00224878	0.00325462	0.000210679	-2.06935e-05	0.000560678	0.00134152	0.000895854	0.00078609	-0.000974242	0.000138747	0.00106209	0.00367679	0.00306677
C	3	Sample X51		5484	6489	7524	8473	9264	10036	10796	11370	11800	12203						IRSp53-PDZ	2	0.451066	0.680842	0.962407	1.27287	1.58165	1.94023	2.36562	2.74903	3.08084	3.43453	0.00283945	0.148238	0.00285178		0	0	0	0	0	0	0	0	0	0	0	0	0	0	0
D	3	Sample X75		3748	3877	4052	4170	4272	4339	4402	4503	4629	4781						IRSp53-SGS	2	0.129085	0.150339	0.179789	0.200059	0.217857	0.229689	0.240919	0.259137	0.282243	0.310692	0.000156007	0.126377	0.000170157		5x
E	3	Sample X99		3528	3584	3666	3701	3710	3696	3681	3706	3779	3853						IRSp53-SGS	2	0.0936955	0.102603	0.11577	0.121435	0.122896	0.120624	0.118194	0.122246	0.134158	0.146356	3.61221e-05	0.0981244	3.71406e-05		200	2.58999	0.96658	0.900504	0.115105	0.0382009	0.025363	0.00609372	1.07798	0.176572	-0.00477793	0.0237294	0.0526801	0.859634	0.990007
F	3	Sample X123		2052	2101	2155	2174	2194	2200	2188	2181	2228	2264						IRSp53-SGS	2	-0.118902	-0.112467	-0.105331	-0.102808	-0.100147	-0.0993468	-0.100946	-0.101877	-0.0956065	-0.0907783	1.99392e-05	-0.114785	2.4899e-05		100	3.87463	1.00647	0.855534	0.051047	0.0111422	0.0074697	0.417025	0.00421043	0.610252	-0.00690468	-0.00489434	0.022932	0.971176	0.934388
G	3	Sample X147		5579	5907	6190	6454	7086	7890	8539	9034	9504	9913						4ebp1-70-PDZ	2	0.471228	0.543224	0.608485	0.672182	0.83689	1.07542	1.29671	1.48641	1.68636	1.87866	0.00137225	0.232205	0.00139008		50	3.05908	0.854001	0.733268	0.0283327	0.00452131	0.00797056	0.200147	0.148544	0.241831	-0.00456657	-0.00492519	0.0177647	0.742806	0.764791
H	3	Sample X171		50	52	53	53	54	52	54	55	54	56						4ebp1-70-PDZ	2	-0.352212	-0.352005	-0.351901	-0.351901	-0.351797	-0.352005	-0.351797	-0.351694	-0.351797	-0.35159	4.14023e-07	-0.352118	1.40348e-05		25	2.07875	0.744809	0.679209	0.013073	0.00637456	0.00746466	0.21654	0.089067	0.143316	-6.70742e-05	0.000583625	0.00507574	0.799198	0.650138
I	3	Sample X195		6275	6907	7429	8051	8702	9311	9894	10436	10976	11469						4ebp1-70-PDZ	2	0.628687	0.78838	0.934322	1.12769	1.35701	1.60171	1.86932	2.15383	2.47936	2.82171	0.00202733	0.359804	0.00203417		12.5	1.34852	0.562961	0.485852	0.00791931	0.00121268	0.00337298	0.136322	0.151567	0.0919327	0.00254257	-0.000631886	0.00616501	0.494531	0.496752
J	3	Sample X219		2486	2486	2492	2499	2479	2459	2492	2559	2609	2606						PYGM15	2	-0.0605178	-0.0605178	-0.0596881	-0.0587194	-0.061485	-0.0642435	-0.0596881	-0.0503804	-0.0433825	-0.0438036	1.57196e-05	-0.0656744	5.01635e-05		6.25	0.639444	0.348285	0.324085	-0.000890203	-0.000351869	0.00248255	0.102073	0.0966292	0.0662678	-0.00854806	-0.00690541	-0.00270903	0.33637	0.339056
K	3	Sample X243		4443	4515	4565	4575	4604	4555	4467	4519	4627	4689						PYGM15	2	0.248282	0.261319	0.270454	0.272288	0.277625	0.268621	0.252613	0.262048	0.281873	0.293397	2.22144e-05	0.255523	3.4485e-05		3.125	0.320048	0.195933	0.145093	0.00745255	-0.002257	0.0019753	0.0553921	0.0468906	0.0385969	-0.0052878	-0.00172842	0.000367666	0.200153	0.211681
L	3	Sample X267		3185	3294	3408	3418	3396	3429	3438	3481	3510	3547						PYGM15	2	0.0405799	0.0571954	0.0748339	0.0763941	0.0729645	0.0781127	0.0795207	0.0862716	0.0908467	0.0967101	4.10327e-05	0.0507233	4.70617e-05		1.5625	0.145345	0.106193	0.105374	0.00622422	0.00119877	-0.000713709	0.0320007	0.0299648	0.0252526	-0.00115761	0.00098642	0.00730394	0.116099	0.118903
A	4	Sample X4		3272	3121	3185	3227	3177	3088	3112	3140	3177	3200						4ebp1-70-SGS	2	0.0538224	0.0309354	0.0405799	0.0469537	0.0393698	0.0259942	0.0295856	0.0337901	0.0393698	0.0428521	-7.02623e-06	0.042541	-2.30156e-05		0.78125	0.0685245	0.0539389	0.0556201	0.00391997	-0.00148786	-0.00516411	0.0191585	0.00979268	0.0137246	-0.00398008	0.00394073	0.00496972	0.0566596	0.057718
B	4	Sample X28		3636	3677	3763	3723	3624	3539	3541	3586	3629	3663						4ebp1-70-SGS	2	0.110935	0.117547	0.131537	0.125009	0.109007	0.0954399	0.0957573	0.102922	0.10981	0.115285	-1.31012e-05	0.119186	-1.63145e-05		0.390625	0.0363273	0.0313061	0.0326535	-0.000681047	-0.0068662	-0.00507926	0.0138038	0.0101938	0.00745351	-0.00408885	0.0140867	0.00233251	0.0361355	0.0347983
C	4	Sample X52		4010	4100	4280	4299	4272	4242	4329	4403	4483	4539						4ebp1-70-SGS	2	0.172655	0.187994	0.219263	0.222611	0.217857	0.212595	0.227915	0.241098	0.255508	0.265696	7.22116e-05	0.178992	7.64399e-05		0.195312	0.0169534	0.0112439	0.0162731	0.00105339	-0.000103467	0.00280339	0.00670759	0.00447927	0.00393045	-0.00487121	0.000693734	0.00531047	0.0183839	0.0153339
D	4	Sample X76		5799	7091	8320	9059	9781	10495	11260	11879	12373	12731						L5A-PDZ	2	0.5191	0.838268	1.21881	1.49653	1.81457	2.1872	2.67069	3.14666	3.59823	3.97583	0.00323054	0.208266	0.00323725		0	0	0	0	0	0	0	0	0	0	0	0	0	0	0
E	4	Sample X100		6151	7528	8587	9397	10085	10775	11399	11919	12317	12740						L5A-PDZ	2	0.59931	0.963601	1.31426	1.63898	1.96528	2.35271	2.77011	3.18061	3.54327	3.98596	0.00311364	0.363223	0.00311463
F	4	Sample X124		5856	6842	7660	8439	9114	9728	10238	10755	11165	11538						L5A-PDZ	2	0.53178	0.771141	1.00349	1.26071	1.519	1.7894	2.04544	2.34048	2.60499	2.87362	0.00218298	0.364215	0.00218726
G	4	Sample X148		3934	4025	4011	3999	4016	4011	4039	4100	4144	4194						L5A-SGS	2	0.159852	0.175198	0.172824	0.170794	0.173672	0.172824	0.177576	0.187994	0.195564	0.204224	3.21843e-05	0.159742	2.91694e-05
H	4	Sample X172		3821	3848	3842	3852	3846	3832	3835	3865	3907	3948						L5A-SGS	2	0.141066	0.145528	0.144535	0.14619	0.145197	0.142882	0.143377	0.148346	0.155337	0.162201	1.34937e-05	0.13937	1.30539e-05
I	4	Sample X196		3571	3692	3712	3709	3715	3730	3760	3776	3830	3857						L5A-SGS	2	0.100529	0.119975	0.123221	0.122733	0.123708	0.126149	0.131046	0.133666	0.142551	0.147019	3.31336e-05	0.10718	3.05292e-05
J	4	Sample X220		10033	10168	10189	10301	10389	10438	10488	10507	10555	10580						PO4-std	2	1.93871	2.00839	2.01944	2.07934	2.12761	2.15495	2.18321	2.19405	2.22165	2.23617	0.000271816	1.95326	0.000266939
K	4	Sample X244		9835	9891	10006	10068	10229	10288	10341	10384	10422	10453						PO4-std	2	1.84055	1.86784	1.92505	1.95656	2.04064	2.0723	2.10115	2.12484	2.14599	2.16339	0.00031904	1.83241	0.000311344
L	4	Sample X268		8157	8364	8617	8791	8881	8911	8958	8956	9014	9010						PO4-std	2	1.16302	1.23419	1.32531	1.39081	1.42564	1.4374	1.45598	1.45518	1.47835	1.47675	0.000272187	1.22095	0.000283669
A	5	Sample X5		6728	7983	9419	10631	11803	12833	13823	14599	15298	15934						IRSp53-PDZ	3	0.741375	1.10541	1.64863	2.26607	3.08331	4.09253	5.50337	7.14152	9.34997	12.5087	0.0101921	-1.37117	0.0101969
B	5	Sample X29		5111	6151	7166	8111	9086	9884	10594	11178	11691	12168						IRSp53-PDZ	3	0.374717	0.59931	0.859077	1.1476	1.50753	1.86441	2.24434	2.61387	2.99263	3.40196	0.00284947	0.0508622	0.00284667
C	5	Sample X53		4740	5722	6728	7632	8485	9343	10077	10577	11073	11542						IRSp53-PDZ	3	0.302955	0.502154	0.741375	0.994945	1.27718	1.6155	1.96117	2.23442	2.54301	2.87667	0.0024319	0.0457975	0.00244423
D	5	Sample X77		3471	3568	3642	3695	3711	3709	3783	3895	3987	4054						IRSp53-SGS	3	0.0846981	0.100051	0.111901	0.120462	0.123058	0.122733	0.134814	0.153335	0.168766	0.18013	8.02927e-05	0.0818192	9.44422e-05
E	5	Sample X101		3266	3327	3389	3393	3349	3276	3319	3365	3414	3444						IRSp53-SGS	3	0.0529041	0.0622736	0.0718754	0.0724976	0.0656716	0.0544349	0.0610405	0.0681491	0.0757698	0.0804603	1.40525e-05	0.0580762	1.5071e-05
F	5	Sample X125		3382	3452	3523	3520	3465	3416	3481	3529	3568	3608						IRSp53-SGS	3	0.0707873	0.0817144	0.0929035	0.0924285	0.083755	0.0760819	0.0862716	0.093854	0.100051	0.106441	2.16088e-05	0.0754636	2.65685e-05
G	5	Sample X149		3333	3809	4252	4644	5010	5384	5807	6178	6522	6798						4ebp1-70-PDZ	3	0.0631993	0.139088	0.214346	0.285022	0.354783	0.430163	0.520872	0.605655	0.689053	0.759583	0.000649327	0.0165802	0.000667156
H	5	Sample X173		2944	3317	3671	3971	4271	4642	4993	5285	5548	5793						4ebp1-70-PDZ	3	0.00468181	0.0607324	0.116577	0.166068	0.217681	0.284651	0.351458	0.409787	0.464616	0.517772	0.000481524	-0.0295122	0.000495145
I	5	Sample X197		4308	4748	5172	5552	5947	6384	6778	7216	7550	7926						4ebp1-70-PDZ	3	0.2242	0.304461	0.386906	0.465467	0.552266	0.655017	0.754358	0.873106	0.970181	1.08696	0.00079926	0.147737	0.000806103
J	5	Sample X221		3401	3427	3440	3430	3392	3300	3268	3287	3355	3400						PYGM15	3	0.0737431	0.0778	0.0798338	0.078269	0.072342	0.058117	0.0532101	0.0561211	0.0666	0.0735873	-1.45337e-05	0.0776826	1.99102e-05
K	5	Sample X245		3163	3171	3139	3119	3091	3122	3173	3198	3225	3240						PYGM15	3	0.0372553	0.0384631	0.0336396	0.0306353	0.0264425	0.0310854	0.0387653	0.0425489	0.0466493	0.0489337	1.19186e-05	0.0302907	2.41892e-05
L	5	Sample X269		2190	2361	2464	2291	2297	2377	2432	2462	2483	2494						PYGM15	3	-0.100679	-0.0776603	-0.0635545	-0.0871429	-0.0863334	-0.0754811	-0.0679566	-0.0638302	-0.0609324	-0.0594114	2.80576e-05	-0.0911328	3.40866e-05
A	6	Sample X6		3007	3021	3097	3095	3019	2989	3011	3027	3049	3067						4ebp1-70-SGS	3	0.0139565	0.0160279	0.0273397	0.0270405	0.0157318	0.0112988	0.0145479	0.0169169	0.0201823	0.022861	7.67482e-07	0.0181298	-1.52219e-05
B	6	Sample X30		3608	3671	3833	3777	3609	3558	3572	3612	3626	3661						4ebp1-70-SGS	3	0.106441	0.116577	0.143047	0.13383	0.106602	0.098459	0.100689	0.107082	0.109329	0.114963	-1.32041e-05	0.121624	-1.64173e-05
C	6	Sample X54		3572	3667	3593	3397	3564	3717	3779	3817	3874	3887						4ebp1-70-SGS	3	0.100689	0.115931	0.104041	0.0731202	0.099414	0.124033	0.134158	0.140406	0.14984	0.152003	5.49874e-05	0.0863711	5.92157e-05
D	6	Sample X78		4997	6106	7125	8049	8965	9615	10258	10786	11262	11680						L5A-PDZ	3	0.352239	0.588797	0.847666	1.12703	1.45876	1.73675	2.05615	2.35946	2.6721	2.98389	0.00246931	0.136701	0.00247602
E	6	Sample X102		5233	6456	7497	8358	9112	9818	10468	10991	11456	11872						L5A-PDZ	3	0.399208	0.672676	0.954375	1.23208	1.51817	1.83234	2.17187	2.48909	2.81204	3.14076	0.00254832	0.193272	0.0025493
F	6	Sample X126		5262	6218	7015	7727	8360	8969	9542	10023	10502	10857						L5A-PDZ	3	0.405098	0.615108	0.817464	1.02412	1.23278	1.46035	1.70347	1.93364	2.19119	2.40355	0.00186187	0.261552	0.00186615
G	6	Sample X150		3568	3742	3424	3402	3564	3653	3709	3772	3807	3854						L5A-SGS	3	0.100051	0.128105	0.0773312	0.0738988	0.099414	0.113672	0.122733	0.13301	0.138759	0.146522	4.7069e-05	0.0851083	4.4054e-05
H	6	Sample X174		3659	3655	3404	3366	3493	3560	3605	3657	3678	3699						L5A-SGS	3	0.11464	0.113995	0.0742104	0.0683041	0.0881626	0.0987773	0.105961	0.114317	0.117709	0.12111	2.06238e-05	0.0893444	2.0184e-05
I	6	Sample X198		3409	3357	3330	3333	3364	3386	3436	3443	3474	3489						L5A-SGS	3	0.0749898	0.0669097	0.0627364	0.0631993	0.0679941	0.071409	0.0792077	0.0803037	0.0851699	0.0875319	1.91907e-05	0.0624307	1.65864e-05
J	6	Sample X222		7745	7867	7934	8048	8119	8162	8234	8251	8301	8310						PO4-std	3	1.02971	1.06808	1.08954	1.1267	1.15027	1.1647	1.18915	1.19497	1.21221	1.21534	0.000172148	1.04078	0.000167272
K	6	Sample X246		7791	7826	7934	7978	8012	8037	8101	8120	8144	8173						PO4-std	3	1.04407	1.05508	1.08954	1.10379	1.11488	1.12308	1.14426	1.1506	1.15865	1.16842	0.000115102	1.04618	0.000107405
L	6	Sample X270		6420	6552	6701	6916	7003	7018	7035	7066	7101	7114						PO4-std	3	0.66382	0.696559	0.734412	0.790783	0.814205	0.81828	0.822912	0.831393	0.841026	0.844619	0.00016282	0.688109	0.000174303
A	7	Sample X7		6113	7495	8696	9832	10917	11904	12920	13684	14399	15017						IRSp53-PDZ	4	0.590427	0.953781	1.35476	1.8391	2.44147	3.16783	4.19558	5.2685	6.65646	8.34802	0.00692432	-0.673003	0.00692915
B	7	Sample X31		4851	6011	6959	7917	8785	9409	10127	10712	11216	11713						IRSp53-PDZ	4	0.32401	0.566856	0.802314	1.08407	1.38851	1.64423	1.98698	2.3144	2.64004	3.0102	0.0024855	0.0848629	0.0024827
C	7	Sample X55		4694	5664	6658	7511	8447	9112	9797	10370	10820	11283						IRSp53-PDZ	4	0.294331	0.489526	0.723388	0.958535	1.26356	1.51817	1.82224	2.1171	2.38047	2.68687	0.0022517	0.0743974	0.00226403
D	7	Sample X79		3507	3496	3539	3471	3413	3490	3556	3602	3665	3709						IRSp53-SGS	4	0.0903726	0.0886358	0.0954399	0.0846981	0.0756137	0.0876895	0.0981408	0.105481	0.115608	0.122733	2.94273e-05	0.0787849	4.35768e-05
E	7	Sample X103		3192	3227	3261	3194	3188	3230	3268	3299	3329	3353						IRSp53-SGS	4	0.0416397	0.0469537	0.0521395	0.0419427	0.041034	0.0474103	0.0532101	0.0579634	0.0625821	0.0662904	2.023e-05	0.0389786	2.12485e-05
F	7	Sample X127		3368	3423	3413	3314	3372	3412	3434	3472	3500	3511						IRSp53-SGS	4	0.0686142	0.0771749	0.0756137	0.0602704	0.0692347	0.0754577	0.0788947	0.0848554	0.0892671	0.0910048	1.99224e-05	0.0650853	2.48822e-05
G	7	Sample X151		3647	4074	4564	4961	5314	5725	6131	6539	6874	7205						4ebp1-70-PDZ	4	0.112706	0.183543	0.27027	0.345221	0.415724	0.50281	0.594628	0.693302	0.779604	0.870009	0.000703971	0.0543992	0.0007218
H	7	Sample X175		2237	2454	2642	2875	3147	3376	3602	3825	4021	4178						4ebp1-70-PDZ	4	-0.0944015	-0.0649321	-0.0387393	-0.00538907	0.0348436	0.0698555	0.105481	0.141726	0.174519	0.201446	0.000283269	-0.117521	0.00029689
I	7	Sample X199		3199	3545	3862	4127	4443	4784	5103	5403	5671	5917						4ebp1-70-PDZ	4	0.0427005	0.0963924	0.147848	0.192633	0.248282	0.31126	0.373127	0.43411	0.491044	0.545479	0.000470875	0.00576241	0.000477718
J	7	Sample X223		3378	3389	3408	3394	3300	3197	3223	3260	3272	3295						PYGM15	4	0.070166	0.0718754	0.0748339	0.0726532	0.058117	0.0423973	0.0463451	0.0519867	0.0538224	0.057349	-2.27578e-05	0.0736093	1.16861e-05
K	7	Sample X247		3870	3936	3944	3809	3762	3811	3876	3900	3928	3937						PYGM15	4	0.149176	0.160188	0.161529	0.139088	0.131373	0.139417	0.150173	0.154169	0.158847	0.160355	4.83475e-06	0.147531	1.71054e-05
L	7	Sample X271		2039	1991	2032	2020	2003	2013	2012	2025	2021	2043						PYGM15	4	-0.120603	-0.126859	-0.121518	-0.123084	-0.125298	-0.123996	-0.124126	-0.122431	-0.122953	-0.12008	1.2955e-06	-0.123872	7.32448e-06
A	8	Sample X8		3306	3288	3435	3407	3252	3304	3372	3402	3427	3446						4ebp1-70-SGS	4	0.0590394	0.0562745	0.0790512	0.074678	0.0507645	0.0587319	0.0692347	0.0738988	0.0778	0.0807737	1.57658e-05	0.0585652	-2.23581e-07
B	8	Sample X32		3532	3670	3688	3613	3525	3538	3596	3639	3648	3652						4ebp1-70-SGS	4	0.0943295	0.116416	0.119327	0.107243	0.0932202	0.0952812	0.104521	0.111418	0.112867	0.113511	5.15865e-06	0.103718	1.94542e-06
C	8	Sample X56		3339	3334	3364	3310	3270	3297	3330	3373	3428	3431						4ebp1-70-SGS	4	0.0641258	0.0633537	0.0679941	0.0596548	0.0535162	0.0576561	0.0627364	0.0693899	0.0779563	0.0784254	1.26908e-05	0.0578664	1.69191e-05
D	8	Sample X80		5068	5989	6989	8070	8990	9689	10355	10933	11481	11915						L5A-PDZ	4	0.366193	0.561824	0.810412	1.13397	1.46873	1.77107	2.10883	2.45168	2.83066	3.1772	0.00265728	0.0736888	0.00266399
E	8	Sample X104		4985	6088	7070	7966	8743	9400	9963	10440	10871	11246						L5A-PDZ	4	0.349896	0.584613	0.832491	1.09989	1.3725	1.64029	1.90347	2.15608	2.41234	2.6609	0.00216614	0.201563	0.00216713
F	8	Sample X128		5019	5927	6697	7464	8165	8727	9305	9752	10221	10610						L5A-PDZ	4	0.356547	0.547738	0.733383	0.944612	1.16572	1.36644	1.59914	1.80076	2.03638	2.25371	0.00176748	0.219952	0.00177176
G	8	Sample X152		3494	3458	3469	3561	3588	3592	3619	3627	3635	3648						L5A-SGS	4	0.0883203	0.0826558	0.0843837	0.0989364	0.103242	0.103881	0.108205	0.109489	0.110775	0.112867	2.88749e-05	0.0829506	2.58599e-05
H	8	Sample X176		3367	3438	3439	3370	3390	3383	3380	3423	3425	3443						L5A-SGS	4	0.0684592	0.0795207	0.0796773	0.0689244	0.0720309	0.0709427	0.0704766	0.0771749	0.0774874	0.0803037	4.21336e-06	0.0719718	3.77357e-06
I	8	Sample X200		2957	2940	2941	2948	2977	2988	3004	3015	3036	3056						L5A-SGS	4	0.00658938	0.00409551	0.00424206	0.00526841	0.00953044	0.0111513	0.0135131	0.0151397	0.0182516	0.0212232	1.57394e-05	0.00145682	1.3135e-05
J	8	Sample X224		6196	6052	6168	6203	6279	6314	6358	6390	6441	6454						PO4-std	4	0.609901	0.576284	0.603302	0.611556	0.629645	0.638053	0.648693	0.656481	0.668979	0.672182	8.05613e-05	0.583171	7.5685e-05
K	8	Sample X248		5861	5795	5841	5946	5971	6021	6059	6081	6119	6110						PO4-std	4	0.532897	0.518214	0.528431	0.552039	0.55772	0.56915	0.577899	0.58299	0.591826	0.589728	7.01294e-05	0.518012	6.24326e-05
L	8	Sample X272		4782	4666	4877	4963	5011	5035	5071	5110	5137	5149						PO4-std	4	0.310881	0.28911	0.328992	0.34561	0.354979	0.359689	0.366786	0.374519	0.379899	0.382297	7.95021e-05	0.301575	9.09846e-05
A	9	Sample X9		5918	7111	8378	9284	10164	11124	11924	12598	13226	13809						IRSp53-PDZ	5	0.545705	0.843789	1.23911	1.59016	2.00629	2.57717	3.18488	3.82998	4.58627	5.47905	0.00449025	-0.105907	0.00449508
B	9	Sample X33		4706	5559	6305	6812	7719	8471	9142	9737	10242	10646						IRSp53-PDZ	5	0.296575	0.466958	0.635886	0.763251	1.02164	1.27215	1.53053	1.79365	2.04758	2.27494	0.00187934	0.0827155	0.00187654
C	9	Sample X57		4379	5213	6082	6730	7322	8026	8608	9191	9654	10075						IRSp53-PDZ	5	0.236807	0.395162	0.583222	0.741893	0.903272	1.11947	1.32199	1.5509	1.75477	1.96014	0.00160718	0.0924553	0.00161951
D	9	Sample X81		3364	3414	3475	3356	3318	3388	3434	3445	3470	3476						IRSp53-SGS	5	0.0679941	0.0757698	0.0853272	0.0667548	0.0608864	0.0717199	0.0788947	0.080617	0.0845409	0.0854846	1.22482e-05	0.06845	2.63977e-05
E	9	Sample X105		3135	3194	3303	3281	3136	3142	3191	3206	3222	3241						IRSp53-SGS	5	0.0330381	0.0419427	0.0585781	0.055201	0.0331885	0.034091	0.0414882	0.0437623	0.046193	0.0490862	3.02372e-06	0.0418427	4.04227e-06
F	9	Sample X129		3250	3302	3295	3223	3186	3226	3254	3292	3306	3324						IRSp53-SGS	5	0.0504592	0.0584244	0.057349	0.0463451	0.0407312	0.0468015	0.0510699	0.0568884	0.0590394	0.061811	6.28351e-06	0.0491218	1.12433e-05
G	9	Sample X153		3230	3576	3893	4091	4375	4726	5021	5300	5554	5785						4ebp1-70-PDZ	5	0.0474103	0.101326	0.153002	0.186451	0.236093	0.300324	0.35694	0.412854	0.465893	0.516003	0.000436579	0.0156825	0.000454408
H	9	Sample X177		3749	4067	4360	4644	4951	5235	5555	5847	6136	6396						4ebp1-70-PDZ	5	0.129248	0.182347	0.233421	0.285022	0.343278	0.399614	0.466106	0.52977	0.595797	0.657945	0.000491604	0.0872925	0.000505225
I	9	Sample X201		2836	3119	3326	3498	3732	3955	4189	4402	4618	4790						4ebp1-70-PDZ	5	-0.0110415	0.0306353	0.0621194	0.0889514	0.126475	0.163376	0.203355	0.240919	0.280209	0.312396	0.000299599	-0.03002	0.000306442
J	9	Sample X225		2994	3047	3052	3019	2947	2911	2929	2966	2983	3003						PYGM15	5	0.0120364	0.019885	0.0206283	0.0157318	0.00512173	-0.000145992	0.00248478	0.00791191	0.0104143	0.0133653	-8.22856e-06	0.0156805	2.62153e-05
K	9	Sample X249		2604	2644	2633	2561	2576	2610	2630	2651	2653	2677						PYGM15	5	-0.0440843	-0.0384572	-0.0400075	-0.0501014	-0.0480061	-0.043242	-0.04043	-0.0374696	-0.0371872	-0.0337932	7.47364e-06	-0.045762	1.97442e-05
L	9	Sample X273		1876	1812	1797	1794	1803	1796	1808	1806	1825	1824						PYGM15	5	-0.141698	-0.149866	-0.151772	-0.152152	-0.15101	-0.151898	-0.150375	-0.150629	-0.148212	-0.14834	-1.92116e-06	-0.148442	4.10782e-06
A	10	Sample X10		3466	3415	3280	3249	3375	3468	3490	3501	3522	3514						4ebp1-70-SGS	5	0.0839122	0.0759258	0.0550478	0.0503065	0.0697003	0.0842265	0.0876895	0.0894249	0.0927452	0.0914792	2.44646e-05	0.063367	8.47525e-06
B	10	Sample X34		3345	3407	3425	3107	3172	3267	3313	3349	3355	3366						4ebp1-70-SGS	5	0.065053	0.074678	0.0774874	0.0288365	0.0386142	0.0530571	0.0601165	0.0656716	0.0666	0.0683041	1.10695e-06	0.0591777	-2.10629e-06
C	10	Sample X58		3383	3486	3392	3236	3370	3437	3436	3468	3486	3497						4ebp1-70-SGS	5	0.0709427	0.0870591	0.072342	0.0483241	0.0689244	0.0793642	0.0792077	0.0842265	0.0870591	0.0887936	1.63218e-05	0.0668313	2.055e-05
D	10	Sample X82		4170	5064	5913	6658	7398	8106	8652	9199	9633	10052						L5A-PDZ	5	0.200059	0.365403	0.544576	0.723388	0.925263	1.14593	1.3383	1.55425	1.74505	1.94838	0.00164172	0.0640249	0.00164844
E	10	Sample X106		4432	5415	6169	6995	7707	8341	8909	9390	9775	10176						L5A-PDZ	5	0.246302	0.436608	0.603537	0.812036	1.01793	1.22613	1.43661	1.63592	1.81171	2.01259	0.00165486	0.131025	0.00165584
F	10	Sample X130		4536	5290	5978	6647	7255	7801	8291	8724	9115	9526						L5A-PDZ	5	0.265148	0.410809	0.559314	0.720581	0.884137	1.04721	1.20875	1.36531	1.51941	1.69625	0.00132816	0.170793	0.00133244
G	10	Sample X154		3304	3403	3279	3270	3303	3289	3336	3361	3387	3400						L5A-SGS	5	0.0587319	0.0740546	0.0548945	0.0535162	0.0585781	0.0564279	0.0636625	0.0675292	0.0715644	0.0735873	1.04914e-05	0.0569598	7.47641e-06
H	10	Sample X178		3399	3335	3259	3068	3067	3128	3152	3157	3198	3224						L5A-SGS	5	0.0734316	0.0635081	0.0518338	0.02301	0.022861	0.0319863	0.0355967	0.0363503	0.0425489	0.0464972	-2.11947e-05	0.0554792	-2.16345e-05
I	10	Sample X202		3311	3292	3288	3297	3304	3305	3327	3346	3368	3360						L5A-SGS	5	0.0598087	0.0568884	0.0562745	0.0576561	0.0587319	0.0588857	0.0622736	0.0652076	0.0686142	0.0673743	1.05477e-05	0.0548429	7.94329e-06
J	10	Sample X226		4504	4582	4666	4685	4734	4783	4813	4835	4861	4858						PO4-std	5	0.259319	0.273574	0.28911	0.29265	0.301827	0.31107	0.316763	0.320953	0.325924	0.325349	6.06827e-05	0.265244	5.58064e-05
K	10	Sample X250		4595	4445	4487	4550	4588	4616	4631	4668	4671	4685						PO4-std	5	0.275966	0.248643	0.256233	0.267706	0.274678	0.279839	0.282613	0.289482	0.29004	0.29265	3.31346e-05	0.255904	2.54378e-05
L	10	Sample X274		3745	3532	3734	3801	3841	3890	3917	3938	3959	3965						PO4-std	5	0.128595	0.0943295	0.126801	0.137771	0.144369	0.152502	0.157007	0.160523	0.164049	0.165058	5.30632e-05	0.111263	6.45458e-05
A	11	Sample X11		5492	6220	7099	7760	8408	9160	9782	10363	10887	11339						IRSp53-PDZ	6	0.452752	0.615582	0.840474	1.03438	1.2497	1.53799	1.81505	2.11324	2.42243	2.7267	0.00212665	0.204841	0.00213148
B	11	Sample X35		4342	5056	5639	6207	6704	7285	7764	8228	8646	9031						IRSp53-PDZ	6	0.230221	0.363824	0.484119	0.612502	0.735184	0.892677	1.03562	1.1871	1.33607	1.4852	0.00116375	0.138001	0.00116095
C	11	Sample X59		4016	4571	5129	5644	6134	6812	7317	7790	8189	8532						IRSp53-PDZ	6	0.173672	0.271554	0.378302	0.485198	0.595329	0.763251	0.901836	1.04376	1.17383	1.29417	0.00106796	0.0673165	0.00108028
D	11	Sample X83		3530	3529	3446	3296	3222	3289	3341	3362	3404	3412						IRSp53-SGS	6	0.0940125	0.093854	0.0807737	0.0575025	0.046193	0.0564279	0.0644348	0.0676842	0.0742104	0.0754577	-1.71169e-05	0.0813252	-2.96734e-06
E	11	Sample X107		3209	3192	3171	3089	3110	3134	3145	3170	3158	3183						IRSp53-SGS	6	0.0442177	0.0416397	0.0384631	0.0261436	0.0292859	0.0328878	0.0345425	0.0383121	0.0365011	0.0402772	-2.19145e-06	0.0375419	-1.1729e-06
F	11	Sample X131		3243	3258	3273	3185	3178	3222	3244	3254	3263	3273						IRSp53-SGS	6	0.0493911	0.051681	0.0539755	0.0405799	0.039521	0.046193	0.0495437	0.0510699	0.0524453	0.0539755	3.31539e-06	0.0468484	8.27515e-06
G	11	Sample X155		3391	3638	3877	3943	4230	4471	4700	4948	5131	5321						4ebp1-70-PDZ	6	0.0721865	0.111257	0.150339	0.161361	0.210497	0.253336	0.295452	0.342696	0.378701	0.417161	0.000322413	0.0458511	0.000340242
H	11	Sample X179		3503	3653	3768	3913	4215	4456	4688	4883	5111	5262						4ebp1-70-PDZ	6	0.0897407	0.113672	0.132355	0.156339	0.207879	0.250626	0.29321	0.330144	0.374717	0.405098	0.000308476	0.0502923	0.000322097
I	11	Sample X203		2998	3214	3367	3500	3690	3848	4009	4151	4281	4430						4ebp1-70-PDZ	6	0.0126269	0.044977	0.0684592	0.0892671	0.119651	0.145528	0.172486	0.196773	0.219439	0.245943	0.000214049	0.00308529	0.000220893
J	11	Sample X227		2823	2849	2914	2853	2808	2792	2791	2808	2812	2820						PYGM15	6	-0.0129193	-0.00916052	0.000292041	-0.00858112	-0.015082	-0.0173843	-0.0175281	-0.015082	-0.0145057	-0.0133521	-7.44069e-06	-0.0078659	2.70032e-05
K	11	Sample X251		2628	2638	2592	2557	2571	2592	2605	2619	2631	2653						PYGM15	6	-0.0407115	-0.0393031	-0.0457668	-0.0506594	-0.048705	-0.0457668	-0.0439439	-0.0419775	-0.0402892	-0.0371872	3.37613e-06	-0.0454567	1.56467e-05
L	11	Sample X275		2092	1974	1877	1834	1860	1870	1878	1892	1890	1888						PYGM15	6	-0.113652	-0.129066	-0.14157	-0.147066	-0.143746	-0.142466	-0.141442	-0.139646	-0.139903	-0.140159	-1.44772e-05	-0.129185	-8.44824e-06
A	12	Sample X12		3282	3278	3340	3403	3314	3170	3186	3222	3267	3265						4ebp1-70-SGS	6	0.0553543	0.0547413	0.0642803	0.0740546	0.0602704	0.0383121	0.0407312	0.046193	0.0530571	0.0527512	-1.25042e-05	0.0614771	-2.84935e-05
B	12	Sample X36		3402	3432	3492	3555	3335	3266	3303	3322	3353	3370						4ebp1-70-SGS	6	0.0738988	0.0785818	0.0880049	0.0979818	0.0635081	0.0529041	0.0585781	0.0615027	0.0662904	0.0689244	-1.98048e-05	0.0829004	-2.3018e-05
C	12	Sample X60		3445	3453	3524	3441	3382	3371	3361	3379	3399	3409						4ebp1-70-SGS	6	0.080617	0.0818712	0.0930619	0.0799904	0.0707873	0.0690795	0.0675292	0.0703213	0.0734316	0.0749898	-1.32584e-05	0.084123	-9.0301e-06
D	12	Sample X84		3849	4467	5074	5617	6259	6892	7405	7851	8234	8591						L5A-PDZ	6	0.145693	0.252613	0.367379	0.479378	0.624863	0.784385	0.927304	1.063	1.18915	1.31573	0.00111452	0.0462379	0.00112123
E	12	Sample X108		4068	4808	5456	6143	6705	7212	7693	8102	8449	8780						L5A-PDZ	6	0.182518	0.315812	0.44518	0.597435	0.735441	0.871979	1.01362	1.1446	1.26428	1.3866	0.0011292	0.118225	0.00113019
F	12	Sample X132		4168	4787	5298	5832	6311	6717	7137	7483	7868	8169						L5A-PDZ	6	0.199713	0.311828	0.412445	0.526427	0.63733	0.738534	0.850997	0.950225	1.0684	1.16707	0.000897272	0.147933	0.000901549
G	12	Sample X156		3216	3273	3243	3279	3279	3285	3273	3295	3307	3317						L5A-SGS	6	0.0452809	0.0539755	0.0493911	0.0548945	0.0548945	0.0558143	0.0539755	0.057349	0.0591932	0.0607324	1.07848e-05	0.0480792	7.76987e-06
H	12	Sample X180		3200	3243	3259	3280	3279	3292	3282	3319	3325	3334						L5A-SGS	6	0.0428521	0.0493911	0.0518338	0.0550478	0.0548945	0.0568884	0.0553543	0.0610405	0.0619652	0.0633537	1.62363e-05	0.0455204	1.57965e-05
I	12	Sample X204		3003	2992	2974	2964	2986	3016	3030	3043	3056	3064						L5A-SGS	6	0.0133653	0.0117413	0.00908879	0.00761788	0.0108564	0.0152877	0.0173616	0.0192908	0.0212232	0.0224141	1.17417e-05	0.00777972	9.13728e-06
J	12	Sample X228		3563	3584	3611	3606	3639	3658	3667	3684	3697	3721						PO4-std	6	0.0992548	0.102603	0.106922	0.106121	0.111418	0.114479	0.115931	0.11868	0.120786	0.124684	2.25969e-05	0.0985297	1.77207e-05
K	12	Sample X252		3455	3415	3456	3509	3531	3551	3580	3590	3614	3612						PO4-std	6	0.082185	0.0759258	0.0823419	0.0906887	0.094171	0.0973458	0.101965	0.103562	0.107403	0.107082	2.96726e-05	0.0764634	2.19759e-05
L	12	Sample X276		3119	2732	2831	2880	2946	2983	3006	3013	3033	3049						PO4-std	6	0.0306353	-0.0259758	-0.0117641	-0.00466233	0.00497507	0.0104143	0.0138087	0.0148438	0.0178065	0.0201823	2.05197e-05	-0.00528547	3.20023e-05
A	13	Sample X13		5075	5412	5925	6372	6889	7362	7833	8278	8667	9026						IRSp53-PDZ	7	0.367577	0.435983	0.547286	0.652095	0.783587	0.914808	1.0573	1.20426	1.34389	1.48318	0.001062	0.241799	0.00106683
B	13	Sample X37		3824	4166	4593	4953	5208	5701	6102	6461	6783	7089						IRSp53-PDZ	7	0.141561	0.199367	0.275598	0.343667	0.394153	0.497568	0.587866	0.67391	0.755662	0.837717	0.000655912	0.0771599	0.000653111
C	13	Sample X61		3431	3697	4017	4249	4548	4905	5240	5526	5805	6050						IRSp53-PDZ	7	0.0784254	0.120786	0.173841	0.213821	0.267341	0.334379	0.400628	0.459943	0.520429	0.575822	0.000471315	0.0317523	0.000483642
D	13	Sample X85		3236	3257	3264	3185	3132	3188	3237	3281	3312	3314						IRSp53-SGS	7	0.0483241	0.0515282	0.0525982	0.0405799	0.0325872	0.041034	0.0484765	0.055201	0.0599626	0.0602704	1.06923e-05	0.0426408	2.48418e-05
E	13	Sample X109		3101	3159	3218	3126	3019	3022	3080	3086	3103	3108						IRSp53-SGS	7	0.0279382	0.0366519	0.0455849	0.0316859	0.0157318	0.016176	0.0247996	0.0256954	0.0282375	0.0289863	-8.5419e-06	0.0332739	-7.52334e-06
F	13	Sample X133		3169	3205	3241	3172	3130	3170	3159	3189	3203	3223						IRSp53-SGS	7	0.0381611	0.0436106	0.0490862	0.0386142	0.0322867	0.0383121	0.0366519	0.0411854	0.0433071	0.0463451	1.62458e-06	0.0397813	6.58434e-06
G	13	Sample X157		3146	3290	3314	3369	3563	3705	3857	3974	4111	4229						4ebp1-70-PDZ	7	0.034693	0.0565814	0.0602704	0.0687693	0.0992548	0.122084	0.147019	0.166574	0.189882	0.210322	0.000166811	0.0154583	0.00018464
H	13	Sample X181		3205	3350	3451	3460	3561	3699	3839	3938	4068	4170						4ebp1-70-PDZ	7	0.0436106	0.0658263	0.0815575	0.0829697	0.0989364	0.12111	0.144039	0.160523	0.182518	0.200059	0.000142681	0.0325063	0.000156302
I	13	Sample X205		2946	3092	3198	3205	3262	3371	3495	3625	3735	3821						4ebp1-70-PDZ	7	0.00497507	0.026592	0.0425489	0.0436106	0.0522924	0.0690795	0.088478	0.109168	0.126964	0.141066	0.000121813	-0.00261061	0.000128656
J	13	Sample X229		3291	3280	3279	3266	3258	3261	3263	3250	3250	3253						PYGM15	7	0.0567349	0.0550478	0.0548945	0.0529041	0.051681	0.0521395	0.0524453	0.0504592	0.0504592	0.0509172	-5.43301e-06	0.0560281	2.90109e-05
K	13	Sample X253		2960	2949	2935	2938	2946	2937	2936	2930	2944	2931						PYGM15	7	0.00703005	0.00541511	0.00336307	0.00380248	0.00497507	0.00365599	0.00350952	0.00263111	0.00468181	0.00277747	-2.48809e-06	0.00567702	9.78252e-06
L	13	Sample X277		2399	2394	2387	2370	2364	2383	2353	2344	2342	2338						PYGM15	7	-0.0724775	-0.0731609	-0.0741169	-0.076435	-0.077252	-0.0746628	-0.0787482	-0.0799709	-0.0802424	-0.0807852	-7.97775e-06	-0.0719985	-1.94878e-06
A	14	Sample X14		2698	2730	2798	2694	2634	2666	2696	2708	2722	2725						4ebp1-70-SGS	7	-0.0308149	-0.026261	-0.0165215	-0.0313828	-0.0398667	-0.0353501	-0.0310989	-0.0293938	-0.0274013	-0.0269738	-1.63661e-06	-0.0285245	-1.7626e-05
B	14	Sample X38		3367	3387	3393	3102	3190	3263	3289	3307	3326	3357						4ebp1-70-SGS	7	0.0684592	0.0715644	0.0724976	0.0280878	0.0413368	0.0524453	0.0564279	0.0591932	0.0621194	0.0669097	-2.54816e-06	0.059433	-5.7614e-06
C	14	Sample X62		3407	3429	3471	3287	3273	3328	3359	3374	3398	3413						4ebp1-70-SGS	7	0.074678	0.0781127	0.0846981	0.0561211	0.0539755	0.0624278	0.0672194	0.0695451	0.0732759	0.0756137	-3.00274e-06	0.0713684	1.22555e-06
D	14	Sample X86		3508	3914	4354	4787	5202	5626	5978	6307	6617	6928						L5A-PDZ	7	0.0905306	0.156506	0.232353	0.311828	0.392942	0.481315	0.559314	0.636367	0.712953	0.793992	0.000660464	0.0405318	0.000667177
E	14	Sample X110		3726	4163	4655	5133	5569	5971	6330	6640	6942	7214						L5A-PDZ	7	0.125498	0.198847	0.287064	0.3791	0.469092	0.55772	0.641913	0.718797	0.797745	0.872542	0.000704617	0.0820616	0.000705602
F	14	Sample X134		3769	4167	4640	4966	5244	5531	5828	6124	6372	6645						L5A-PDZ	7	0.132519	0.19954	0.284281	0.346194	0.401439	0.461003	0.525536	0.592993	0.652095	0.720071	0.000535202	0.110446	0.000539479
G	14	Sample X158		3155	3204	3198	3257	3252	3264	3264	3286	3300	3304						L5A-SGS	7	0.0360488	0.0434588	0.0425489	0.0515282	0.0507645	0.0525982	0.0525982	0.0559677	0.058117	0.0587319	1.9136e-05	0.0387546	1.6121e-05
H	14	Sample X182		3212	3234	3178	3179	3206	3216	3240	3242	3258	3243						L5A-SGS	7	0.0446732	0.0480194	0.039521	0.0396722	0.0437623	0.0452809	0.0489337	0.0492387	0.051681	0.0493911	7.37292e-06	0.0415936	6.93313e-06
I	14	Sample X206		3257	3195	3156	3159	3179	3205	3201	3220	3240	3221						L5A-SGS	7	0.0515282	0.0420942	0.0361996	0.0366519	0.0396722	0.0436106	0.0430038	0.0458889	0.0489337	0.0460409	3.5319e-06	0.0412433	9.27526e-07
J	14	Sample X230		2962	2968	2993	3023	3029	3057	3062	3069	3085	3080						PO4-std	7	0.00732393	0.00820601	0.0118888	0.0163242	0.0172133	0.021372	0.0221163	0.023159	0.0255461	0.0247996	1.80074e-05	0.00699047	1.31312e-05
K	14	Sample X254		3058	2986	3004	3018	3038	3038	3038	3056	3062	3075						PO4-std	7	0.0215208	0.0108564	0.0135131	0.0155837	0.0185484	0.0185484	0.0185484	0.0212232	0.0221163	0.0240536	7.52819e-06	0.0139343	-1.68605e-07
L	14	Sample X278		2380	2356	2405	2438	2425	2431	2464	2480	2476	2497						PO4-std	7	-0.075072	-0.0783404	-0.0716569	-0.0671325	-0.0689171	-0.0680938	-0.0635545	-0.0613468	-0.0618992	-0.0589963	1.6307e-05	-0.0772851	2.77895e-05
A	15	Sample X15		5111	5090	5322	5372	5620	6030	6342	6625	6907	7159						IRSp53-PDZ	8	0.374717	0.370548	0.417366	0.427677	0.480023	0.571217	0.644815	0.714983	0.78838	0.857123	0.000479655	0.276892	0.000484485
B	15	Sample X39		3657	3910	4226	4502	4540	4847	5097	5322	5520	5732						IRSp53-PDZ	8	0.114317	0.155838	0.209798	0.258955	0.265878	0.323245	0.371936	0.417366	0.458671	0.504343	0.000356778	0.0939678	0.000353977
C	15	Sample X63		3302	3527	3769	3929	4217	4457	4698	4930	5148	5309						IRSp53-PDZ	8	0.0584244	0.0935371	0.132519	0.159015	0.208228	0.250807	0.295078	0.339208	0.382097	0.414698	0.000338919	0.0300097	0.000351246
D	15	Sample X87		3246	3171	3111	3108	3136	3148	3183	3219	3216	3221						IRSp53-SGS	8	0.0498488	0.0384631	0.0294358	0.0289863	0.0331885	0.0349942	0.0402772	0.0457369	0.0452809	0.0460409	6.59787e-06	0.0352665	2.07474e-05
E	15	Sample X111		3071	3057	3018	2962	2988	2997	3020	3040	3063	3078						IRSp53-SGS	8	0.0234571	0.021372	0.0155837	0.00732393	0.0111513	0.0124792	0.0158799	0.0188453	0.0222652	0.0245011	2.97734e-06	0.0154995	3.99589e-06
F	15	Sample X135		3247	3248	3184	3045	3094	3105	3127	3161	3170	3186						IRSp53-SGS	8	0.0500013	0.0501539	0.0404285	0.0195879	0.026891	0.028537	0.0318361	0.0369536	0.0383121	0.0407312	-7.33879e-06	0.0407465	-2.37903e-06
G	15	Sample X159		3137	3215	3272	3181	3309	3406	3494	3584	3665	3748						4ebp1-70-PDZ	8	0.0333388	0.0451289	0.0538224	0.0399747	0.0595009	0.0745221	0.0883203	0.102603	0.115608	0.129085	8.88399e-05	0.0208865	0.000106669
H	15	Sample X183		3120	3240	3317	3232	3319	3415	3508	3582	3688	3734						4ebp1-70-PDZ	8	0.0307853	0.0489337	0.0607324	0.0477148	0.0610405	0.0759258	0.0905306	0.102284	0.119327	0.126801	8.62619e-05	0.0246504	9.98826e-05
I	15	Sample X207		2900	2982	3022	2964	3076	3169	3236	3320	3397	3437						4ebp1-70-PDZ	8	-0.00175065	0.0102669	0.016176	0.00761788	0.0242027	0.0381611	0.0483241	0.0611945	0.0731202	0.0793642	7.73321e-05	-0.0107316	8.41752e-05
J	15	Sample X231		2576	2613	2666	2628	2541	2506	2524	2544	2569	2583						PYGM15	8	-0.0480061	-0.0428207	-0.0353501	-0.0407115	-0.0528888	-0.0577498	-0.0552525	-0.0524711	-0.0489844	-0.047027	-8.5062e-06	-0.0430225	2.59377e-05
K	15	Sample X255		2498	2516	2531	2504	2488	2480	2509	2507	2530	2546						PYGM15	8	-0.0588578	-0.0563631	-0.0542799	-0.0580269	-0.0602413	-0.0613468	-0.057334	-0.0576112	-0.0544189	-0.0521926	2.92493e-06	-0.0588222	1.51955e-05
L	15	Sample X279		1987	2013	2052	1979	1890	1911	1946	1963	1963	1981						PYGM15	8	-0.127379	-0.123996	-0.118902	-0.128417	-0.139903	-0.137204	-0.13269	-0.130491	-0.130491	-0.128158	-6.08792e-06	-0.12611	-5.89434e-08
A	16	Sample X16		2613	2607	2443	2387	2506	2570	2598	2606	2620	2627						4ebp1-70-SGS	8	-0.0428207	-0.0436632	-0.0664454	-0.0741169	-0.0577498	-0.0488447	-0.0449258	-0.0438036	-0.0418369	-0.0408522	1.21307e-05	-0.0577843	-3.85871e-06
B	16	Sample X40		2951	3008	3097	3076	3061	3058	3016	3044	3054	3062						4ebp1-70-SGS	8	0.00570856	0.0141043	0.0273397	0.0242027	0.0219674	0.0215208	0.0152877	0.0194393	0.0209257	0.0221163	6.5013e-06	0.0153605	3.28807e-06
C	16	Sample X64		3329	3298	3302	3324	3347	3350	3394	3412	3421	3434						4ebp1-70-SGS	8	0.0625821	0.0578098	0.0584244	0.061811	0.0653622	0.0658263	0.0726532	0.0754577	0.0768625	0.0788947	2.01182e-05	0.0554975	2.43465e-05
D	16	Sample X88		3214	3498	3775	4008	4356	4581	4840	5064	5263	5490						L5A-PDZ	8	0.044977	0.0889514	0.133502	0.172316	0.232709	0.273391	0.321908	0.365403	0.405301	0.45233	0.000380282	0.0209095	0.000386995
E	16	Sample X112		3483	3666	4006	4299	4578	4839	5098	5315	5516	5710						L5A-PDZ	8	0.0865865	0.11577	0.171978	0.222611	0.272839	0.321717	0.372135	0.415929	0.457824	0.499531	0.000395358	0.0564773	0.000396343
F	16	Sample X136		3473	3713	3902	4152	4406	4614	4815	5012	5156	5332						L5A-PDZ	8	0.0850126	0.123383	0.154502	0.196945	0.241635	0.27947	0.317143	0.355175	0.383698	0.419422	0.000314832	0.0667393	0.000319109
G	16	Sample X160		3095	3161	3139	3188	3223	3229	3257	3261	3260	3279						L5A-SGS	8	0.0270405	0.0369536	0.0336396	0.041034	0.0463451	0.0472581	0.0515282	0.0521395	0.0519867	0.0548945	2.42835e-05	0.0297119	2.12685e-05
H	16	Sample X184		3085	3113	3138	3163	3173	3186	3204	3227	3240	3249						L5A-SGS	8	0.0255461	0.0297355	0.0334892	0.0372553	0.0387653	0.0407312	0.0434588	0.0469537	0.0489337	0.0503065	2.24813e-05	0.0260288	2.20415e-05
I	16	Sample X208		3535	3483	3507	3493	3512	3523	3566	3564	3568	3609						L5A-SGS	8	0.0948053	0.0865865	0.0903726	0.0881626	0.0911629	0.0929035	0.0997326	0.099414	0.100051	0.106602	1.42463e-05	0.0864315	1.1642e-05
J	16	Sample X232		2634	2627	2664	2685	2715	2740	2754	2764	2765	2768						PO4-std	8	-0.0398667	-0.0408522	-0.0356329	-0.0326596	-0.028398	-0.0248341	-0.0228333	-0.021402	-0.0212587	-0.0208289	2.0843e-05	-0.0413625	1.59668e-05
K	16	Sample X256		2939	2842	2706	2680	2671	2700	2703	2735	2750	2754						PO4-std	8	0.00394899	-0.0101737	-0.0296782	-0.0333682	-0.0346427	-0.0305308	-0.0301046	-0.0255478	-0.0234053	-0.0228333	-1.51064e-05	-0.0145697	-2.28032e-05
L	16	Sample X280		2206	1984	2068	2138	2147	2177	2195	2197	2222	2236						PO4-std	8	-0.0985464	-0.127768	-0.116805	-0.107583	-0.106391	-0.102409	-0.100013	-0.0997467	-0.0964091	-0.0945354	1.85654e-05	-0.11616	3.00479e-05
A	17	Sample X17		4727	4680	4768	4726	4823	5070	5275	5474	5649	5811						IRSp53-PDZ	9	0.300512	0.291717	0.308233	0.300324	0.318666	0.366589	0.407746	0.448961	0.486279	0.521759	0.000223585	0.240928	0.000228415
B	17	Sample X41		3482	3687	3947	3892	4009	4168	4316	4450	4568	4693						IRSp53-PDZ	9	0.0864291	0.119165	0.162033	0.152835	0.172486	0.199713	0.225614	0.249544	0.271004	0.294144	0.000182597	0.0837384	0.000179796
C	17	Sample X65		3256	3391	3492	3490	3700	3846	3995	4126	4261	4353						IRSp53-PDZ	9	0.0513754	0.0721865	0.0880049	0.0876895	0.121272	0.145197	0.170117	0.192461	0.215925	0.232175	0.000173074	0.0337962	0.0001854
D	17	Sample X89		3173	3205	3138	3058	3097	3110	3142	3143	3154	3165						IRSp53-SGS	9	0.0387653	0.0436106	0.0334892	0.0215208	0.0273397	0.0292859	0.034091	0.0342415	0.0358981	0.0375572	-1.08295e-06	0.0342297	1.30666e-05
E	17	Sample X113		3057	3080	3026	2883	2949	2948	2968	3001	3006	3012						IRSp53-SGS	9	0.021372	0.0247996	0.0167687	-0.00422606	0.00541511	0.00526841	0.00820601	0.0130699	0.0138087	0.0146959	-5.97809e-06	0.0155047	-4.95954e-06
F	17	Sample X137		3287	3277	3160	2992	3044	3054	3076	3086	3100	3115						IRSp53-SGS	9	0.0561211	0.0545881	0.0368028	0.0117413	0.0194393	0.0209257	0.0242027	0.0256954	0.0277885	0.0300354	-2.21735e-05	0.0440381	-1.72137e-05
G	17	Sample X161		3127	3127	3012	3022	3098	3179	3258	3300	3342	3379						4ebp1-70-PDZ	9	0.0318361	0.0318361	0.0146959	0.016176	0.0274893	0.0396722	0.051681	0.058117	0.0645893	0.0703213	4.60325e-05	0.0130219	6.38616e-05
H	17	Sample X185		3381	3426	3456	3384	3341	3345	3393	3477	3507	3569						4ebp1-70-PDZ	9	0.070632	0.0776437	0.0823419	0.0710981	0.0644348	0.065053	0.0724976	0.0856419	0.0903726	0.10021	1.90215e-05	0.0665797	3.26423e-05
I	17	Sample X209		2774	2868	2898	2809	2855	2921	2956	3007	3069	3085						4ebp1-70-PDZ	9	-0.0199688	-0.00640571	-0.00204216	-0.014938	-0.00829131	0.00131478	0.00644253	0.0139565	0.023159	0.0255461	3.89054e-05	-0.021466	4.57485e-05
J	17	Sample X233		2435	2486	2443	2435	2448	2475	2478	2488	2492	2498						PYGM15	9	-0.0675446	-0.0605178	-0.0664454	-0.0675446	-0.0657578	-0.0620372	-0.0616231	-0.0602413	-0.0596881	-0.0588578	6.89365e-06	-0.067162	4.13375e-05
K	17	Sample X257		2422	2462	2482	2453	2416	2404	2418	2429	2435	2444						PYGM15	9	-0.0693285	-0.0638302	-0.0610706	-0.0650697	-0.0701509	-0.0717937	-0.0698768	-0.0683683	-0.0675446	-0.0663079	-2.59435e-06	-0.0657775	9.67625e-06
L	17	Sample X281		1852	1890	1938	1870	1810	1834	1856	1884	1885	1890						PYGM15	9	-0.144769	-0.139903	-0.133724	-0.142466	-0.150121	-0.147066	-0.144257	-0.140672	-0.140544	-0.139903	1.1321e-07	-0.14241	6.14219e-06
A	18	Sample X18		3142	3119	3092	2993	3015	3065	3087	3099	3130	3133						4ebp1-70-SGS	9	0.034091	0.0306353	0.026592	0.0118888	0.0151397	0.022563	0.0258448	0.0276389	0.0322867	0.0327375	2.72244e-06	0.0243083	-1.32669e-05
B	18	Sample X42		3055	3039	3205	3114	3096	3133	3150	3173	3180	3187						4ebp1-70-SGS	9	0.0210745	0.0186968	0.0436106	0.0298854	0.0271901	0.0327375	0.0352954	0.0387653	0.0398234	0.0408826	1.6349e-05	0.0229868	1.31358e-05
C	18	Sample X66		3218	3254	3270	3269	3233	3263	3300	3297	3310	3323						4ebp1-70-SGS	9	0.0455849	0.0510699	0.0535162	0.0533632	0.0478671	0.0524453	0.058117	0.0576561	0.0596548	0.0616569	1.23375e-05	0.0466907	1.65657e-05
D	18	Sample X90		2886	3059	3196	3273	3422	3600	3732	3876	4015	4121						L5A-PDZ	9	-0.00378962	0.0216697	0.0422458	0.0539755	0.0770187	0.105161	0.126475	0.150173	0.173502	0.191601	0.000182152	-0.0154883	0.000188865
E	18	Sample X114		3378	3442	3464	3629	3835	3969	4134	4294	4397	4506						L5A-PDZ	9	0.070166	0.080147	0.0835979	0.10981	0.143377	0.165731	0.193839	0.221729	0.240024	0.259682	0.000191408	0.0419656	0.000192393
F	18	Sample X138		3535	3641	3633	3530	3718	3855	3979	4116	4217	4303						L5A-PDZ	9	0.0948053	0.11174	0.110453	0.0940125	0.124196	0.146687	0.167416	0.190741	0.208228	0.223317	0.000125059	0.0721243	0.000129336
G	18	Sample X162		3340	3298	3312	3349	3363	3370	3379	3401	3409	3414						L5A-SGS	9	0.0642803	0.0578098	0.0599626	0.0656716	0.0678391	0.0689244	0.0703213	0.0737431	0.0749898	0.0757698	1.55355e-05	0.0586099	1.25205e-05
H	18	Sample X186		3104	3123	3154	3143	3165	3196	3193	3204	3207	3230						L5A-SGS	9	0.0283872	0.0312355	0.0358981	0.0342415	0.0375572	0.0422458	0.0417912	0.0434588	0.0439141	0.0474103	1.64191e-05	0.0287625	1.59793e-05
I	18	Sample X210		3023	2955	2946	2959	2963	2969	2984	2979	2979	2989						L5A-SGS	9	0.0163242	0.0062957	0.00497507	0.00688314	0.00747089	0.00835309	0.0105616	0.00982497	0.00982497	0.0112988	7.90079e-07	0.00870719	-1.81429e-06
J	18	Sample X234		1894	1901	1925	1976	1981	2004	2015	2011	2024	2020						PO4-std	9	-0.139389	-0.13849	-0.135401	-0.128806	-0.128158	-0.125168	-0.123736	-0.124257	-0.122562	-0.123084	1.6776e-05	-0.138971	1.18997e-05
K	18	Sample X258		2443	2396	2389	2408	2417	2425	2438	2450	2461	2450						PO4-std	9	-0.0664454	-0.0728876	-0.0738438	-0.0712464	-0.0700139	-0.0689171	-0.0671325	-0.0654826	-0.063968	-0.0654826	6.38114e-06	-0.0723707	-1.31566e-06
L	18	Sample X282		1914	1791	1855	1874	1888	1914	1927	1929	1949	1950						PO4-std	9	-0.136818	-0.152533	-0.144385	-0.141954	-0.140159	-0.136818	-0.135143	-0.134885	-0.132303	-0.132173	1.2863e-05	-0.146435	2.43455e-05
A	19	Sample X19		4416	4431	4537	4475	4483	4640	4772	4885	4970	5052						IRSp53-PDZ	10	0.243428	0.246123	0.26533	0.25406	0.255508	0.284281	0.308989	0.330529	0.346972	0.363036	0.000116261	0.220069	0.000121091
B	19	Sample X43		3351	3436	3511	3418	3596	3711	3796	3882	3965	4049						IRSp53-PDZ	10	0.065981	0.0792077	0.0910048	0.0763941	0.104521	0.123058	0.136949	0.151171	0.165058	0.179278	0.000107154	0.0529696	0.000104354
C	19	Sample X67		3061	3127	3248	3233	3285	3400	3487	3585	3661	3725						IRSp53-PDZ	10	0.0219674	0.0318361	0.0501539	0.0478671	0.0558143	0.0735873	0.0872167	0.102763	0.114963	0.125335	9.65181e-05	0.0132394	0.000108845
D	19	Sample X91		3231	3198	3220	3200	3048	3047	3078	3103	3137	3145						IRSp53-SGS	10	0.0475625	0.0425489	0.0458889	0.0428521	0.0200336	0.019885	0.0245011	0.0282375	0.0333388	0.0345425	-1.64197e-05	0.0437909	-2.27016e-06
E	19	Sample X115		3130	3131	3115	3041	2919	2927	2949	2973	2996	2990						IRSp53-SGS	10	0.0322867	0.0324369	0.0300354	0.0189938	0.00102248	0.00219216	0.00541511	0.00894161	0.0123316	0.0114463	-2.39059e-05	0.0298537	-2.28873e-05
F	19	Sample X139		3225	3205	3192	3110	3016	3033	3053	3069	3086	3083						IRSp53-SGS	10	0.0466493	0.0436106	0.0416397	0.0292859	0.0152877	0.0178065	0.020777	0.023159	0.0256954	0.0252474	-2.18906e-05	0.0420502	-1.69309e-05
G	19	Sample X163		3015	3030	3068	3042	3064	3102	3139	3150	3194	3219						4ebp1-70-PDZ	10	0.0151397	0.0173616	0.02301	0.0191423	0.0224141	0.0280878	0.0336396	0.0352954	0.0419427	0.0457369	2.81836e-05	0.0112669	4.60127e-05
H	19	Sample X187		3073	3089	3069	3025	3039	3087	3111	3162	3190	3207						4ebp1-70-PDZ	10	0.0237553	0.0261436	0.023159	0.0166205	0.0186968	0.0258448	0.0294358	0.0371045	0.0413368	0.0439141	2.03587e-05	0.0163859	3.39794e-05
I	19	Sample X211		2785	2836	2845	2781	2771	2823	2838	2888	2920	2944						4ebp1-70-PDZ	10	-0.0183901	-0.0110415	-0.00973961	-0.0189644	-0.0203989	-0.0129193	-0.0107523	-0.00349857	0.00116862	0.00468181	1.8002e-05	-0.0207866	2.4845e-05
J	19	Sample X235		2544	2640	2683	2555	2449	2469	2480	2497	2505	2517						PYGM15	10	-0.0524711	-0.0390212	-0.0329431	-0.0509383	-0.0656202	-0.0628651	-0.0613468	-0.0589963	-0.0578883	-0.0562244	-1.63932e-05	-0.0439956	1.80507e-05
K	19	Sample X259		2484	2469	2478	2454	2412	2398	2373	2396	2402	2408						PYGM15	10	-0.0607942	-0.0628651	-0.0616231	-0.0649321	-0.0706988	-0.0726142	-0.0760263	-0.0728876	-0.0720673	-0.0712464	-1.26266e-05	-0.0609996	-3.55955e-07
L	19	Sample X283		1924	1922	1955	1896	1796	1801	1831	1854	1865	1886						PYGM15	10	-0.13553	-0.135787	-0.131527	-0.139132	-0.151898	-0.151264	-0.147448	-0.144513	-0.143106	-0.140416	-9.31583e-06	-0.136473	-3.28686e-06
A	20	Sample X20		2505	2540	2626	2579	2521	2535	2529	2562	2566	2573						4ebp1-70-SGS	10	-0.0578883	-0.053028	-0.040993	-0.0475866	-0.0556691	-0.0537236	-0.0545578	-0.0499618	-0.0494034	-0.0484255	2.35987e-06	-0.0525396	-1.36295e-05
B	20	Sample X44		4127	4234	4426	4311	4324	4299	4386	4449	4486	4518						4ebp1-70-SGS	10	0.192633	0.211196	0.245224	0.22473	0.22703	0.222611	0.238057	0.249363	0.256052	0.261866	5.01688e-05	0.202775	4.69555e-05
C	20	Sample X68		3126	3156	3216	3080	3127	3133	3143	3146	3191	3168						4ebp1-70-SGS	10	0.0316859	0.0361996	0.0452809	0.0247996	0.0318361	0.0327375	0.0342415	0.034693	0.0414882	0.0380101	3.54675e-06	0.0329692	7.77505e-06
D	20	Sample X92		3209	3276	3349	3372	3434	3549	3673	3787	3878	3953						L5A-PDZ	10	0.0442177	0.0544349	0.0656716	0.0692347	0.0788947	0.0970279	0.1169	0.135471	0.150505	0.16304	0.000113739	0.0292967	0.000120452
E	20	Sample X116		3084	3143	3258	3319	3428	3518	3613	3698	3782	3844						L5A-PDZ	10	0.0253967	0.0342415	0.051681	0.0610405	0.0779563	0.092112	0.107243	0.120948	0.13465	0.144866	0.000115009	0.016008	0.000115994
F	20	Sample X140		3275	3336	3415	3413	3483	3550	3622	3681	3719	3790						L5A-PDZ	10	0.0542817	0.0636625	0.0759258	0.0756137	0.0865865	0.0971868	0.108686	0.118194	0.124359	0.135963	7.48064e-05	0.0491621	7.90835e-05
G	20	Sample X164		3164	3232	3318	3318	3367	3376	3404	3422	3440	3455						L5A-SGS	10	0.0374063	0.0477148	0.0608864	0.0608864	0.0684592	0.0698555	0.0742104	0.0770187	0.0798338	0.082185	3.78723e-05	0.0431223	3.48573e-05
H	20	Sample X188		3103	3120	2975	2977	3020	3035	3048	3061	3060	3082						L5A-SGS	10	0.0282375	0.0307853	0.00923599	0.00953044	0.0158799	0.0181032	0.0200336	0.0219674	0.0218185	0.0250981	3.21599e-07	0.019876	-1.18196e-07
I	20	Sample X212		3181	3090	3035	3049	3037	3070	3059	3080	3070	3086						L5A-SGS	10	0.0399747	0.0262931	0.0181032	0.0201823	0.0184	0.0233081	0.0216697	0.0247996	0.0233081	0.0256954	-5.38162e-06	0.0274024	-7.98599e-06
J	20	Sample X236		2334	2296	2279	2255	2271	2285	2291	2290	2306	2307						PO4-std	10	-0.0813277	-0.0864683	-0.0887601	-0.0919874	-0.089837	-0.0879518	-0.0871429	-0.0872778	-0.0851179	-0.0849828	1.96003e-08	-0.0870971	-4.85668e-06
K	20	Sample X260		2420	2346	2357	2388	2395	2393	2406	2418	2431	2444						PO4-std	10	-0.0696027	-0.0796993	-0.0782044	-0.0739804	-0.0730243	-0.0732975	-0.0715201	-0.0698768	-0.0680938	-0.0663079	8.06247e-06	-0.0771982	3.65675e-07
L	20	Sample X284		1895	1884	1828	1863	1884	1908	1913	1922	1933	1939						PO4-std	10	-0.139261	-0.140672	-0.14783	-0.143362	-0.140672	-0.13759	-0.136946	-0.135787	-0.134369	-0.133595	8.97283e-06	-0.144392	2.04554e-05
A	21	Sample X21		3886	3886	3973	3814	3851	3948	4035	4091	4154	4198						IRSp53-PDZ	11	0.151836	0.151836	0.166405	0.139912	0.146025	0.162201	0.176896	0.186451	0.197291	0.204919	5.16813e-05	0.137368	5.65113e-05
B	21	Sample X45		3397	3451	3564	3398	3462	3523	3565	3620	3661	3698						IRSp53-PDZ	11	0.0731202	0.0815575	0.099414	0.0732759	0.0832838	0.0929035	0.0995733	0.108365	0.114963	0.120948	4.02805e-05	0.0705721	3.74797e-05
C	21	Sample X69		3007	3066	3100	3061	3052	3125	3193	3231	3286	3322						IRSp53-PDZ	11	0.0139565	0.022712	0.0277885	0.0219674	0.0206283	0.0315358	0.0417912	0.0475625	0.0559677	0.0615027	4.19169e-05	0.0093911	5.42436e-05
D	21	Sample X93		3157	3125	3113	3100	3032	3024	3042	3063	3068	3093						IRSp53-SGS	11	0.0363503	0.0315358	0.0297355	0.0277885	0.0176582	0.0164723	0.0191423	0.0222652	0.02301	0.0267415	-1.06382e-05	0.0314529	3.51131e-06
E	21	Sample X117		2925	2931	2944	2922	2864	2869	2891	2901	2926	2942						IRSp53-SGS	11	0.00189963	0.00277747	0.00468181	0.00146097	-0.00698624	-0.00626054	-0.00306185	-0.00160487	0.00204589	0.00438862	-1.36345e-06	0.000752157	-3.44892e-07
F	21	Sample X141		3025	2997	3000	2972	2981	3004	3008	3029	3026	3037						IRSp53-SGS	11	0.0166205	0.0124792	0.0129222	0.00879446	0.0101196	0.0135131	0.0141043	0.0172133	0.0167687	0.0184	4.38487e-06	0.0114626	9.34463e-06
G	21	Sample X165		3072	3030	2967	2946	2950	2991	3009	3037	3043	3065						4ebp1-70-PDZ	11	0.0236062	0.0173616	0.00805895	0.00497507	0.00556182	0.0115938	0.0142522	0.0184	0.0192908	0.022563	4.5295e-06	0.0118486	2.23586e-05
H	21	Sample X189		3036	3051	2987	2921	2941	2967	2996	3012	3024	3035						4ebp1-70-PDZ	11	0.0182516	0.0204796	0.0110039	0.00131478	0.00424206	0.00805895	0.0123316	0.0146959	0.0164723	0.0181032	1.31015e-06	0.0117093	1.49309e-05
I	21	Sample X213		2732	2768	2745	2670	2680	2694	2733	2756	2792	2781						4ebp1-70-PDZ	11	-0.0259758	-0.0208289	-0.02412	-0.0347842	-0.0333682	-0.0313828	-0.0258332	-0.0225472	-0.0173843	-0.0189644	6.25842e-06	-0.029274	1.31015e-05
J	21	Sample X237		3234	3234	3235	3204	3111	3076	3093	3118	3131	3166						PYGM15	11	0.0480194	0.0480194	0.0481718	0.0434588	0.0294358	0.0242027	0.0267415	0.0304853	0.0324369	0.0377081	-1.74594e-05	0.0473436	1.69845e-05
K	21	Sample X261		2443	2430	2426	2408	2369	2358	2376	2386	2395	2402						PYGM15	11	-0.0664454	-0.0682311	-0.06878	-0.0712464	-0.0765712	-0.0780684	-0.0756174	-0.0742534	-0.0730243	-0.0720673	-6.37005e-06	-0.0686085	5.90056e-06
L	21	Sample X285		2296	2292	2374	2118	2126	2176	2235	2292	2328	2372						PYGM15	11	-0.0864683	-0.087008	-0.07589	-0.110226	-0.109169	-0.102542	-0.0946694	-0.087008	-0.082141	-0.0761626	6.28926e-06	-0.0949021	1.23182e-05
A	22	Sample X22		2885	2898	2835	2740	2784	2800	2834	2843	2866	2869						4ebp1-70-SGS	11	-0.00393512	-0.00204216	-0.011186	-0.0248341	-0.0185337	-0.0162338	-0.0113306	-0.010029	-0.00669601	-0.00626054	-2.4799e-07	-0.0109593	-1.62374e-05
B	22	Sample X46		3333	3361	3434	3402	3403	3411	3430	3394	3386	3404						4ebp1-70-SGS	11	0.0631993	0.0675292	0.0788947	0.0738988	0.0740546	0.0753017	0.078269	0.0726532	0.071409	0.0742104	5.52568e-06	0.0696266	2.31245e-06
C	22	Sample X70		3200	3263	3333	3234	3296	3315	3313	3316	3323	3328						4ebp1-70-SGS	11	0.0428521	0.0524453	0.0631993	0.0480194	0.0575025	0.0604244	0.0601165	0.0605784	0.0616569	0.0624278	1.34733e-05	0.0488383	1.77016e-05
D	22	Sample X94		2938	2949	2964	3011	3060	3115	3168	3215	3253	3305						L5A-PDZ	11	0.00380248	0.00541511	0.00761788	0.0145479	0.0218185	0.0300354	0.0380101	0.0451289	0.0509172	0.0588857	5.45668e-05	-0.00512214	6.12798e-05
E	22	Sample X118		3101	3081	3122	3131	3183	3243	3288	3342	3373	3416						L5A-PDZ	11	0.0279382	0.0249488	0.0310854	0.0324369	0.0402772	0.0493911	0.0562745	0.0645893	0.0693899	0.0760819	5.01276e-05	0.0171648	5.11129e-05
F	22	Sample X142		3124	3165	3249	3262	3288	3327	3378	3410	3445	3475						L5A-PDZ	11	0.0313856	0.0375572	0.0503065	0.0522924	0.0562745	0.0622736	0.070166	0.0751458	0.080617	0.0853272	4.90257e-05	0.0307192	5.33028e-05
G	22	Sample X166		3098	3174	3126	3125	3163	3172	3163	3184	3191	3198						L5A-SGS	11	0.0274893	0.0389164	0.0316859	0.0315358	0.0372553	0.0386142	0.0372553	0.0404285	0.0414882	0.0425489	1.08975e-05	0.0301833	7.88253e-06
H	22	Sample X190		3207	3295	3175	3166	3200	3218	3206	3226	3246	3242						L5A-SGS	11	0.0439141	0.057349	0.0390675	0.0377081	0.0428521	0.0455849	0.0437623	0.0468015	0.0498488	0.0492387	2.77701e-06	0.0439465	2.33722e-06
I	22	Sample X214		3011	2947	2919	2912	2919	2924	2943	2930	2937	2947						L5A-SGS	11	0.0145479	0.00512173	0.00102248	0	0.00102248	0.00175339	0.0045352	0.00263111	0.00365599	0.00512173	-3.67255e-06	0.00614473	-6.27692e-06
J	22	Sample X238		2306	2236	2240	2260	2301	2294	2310	2314	2309	2331						PO4-std	11	-0.0851179	-0.0945354	-0.0939995	-0.0913158	-0.0857933	-0.0867382	-0.0845773	-0.0840364	-0.0847125	-0.0817345	8.49992e-06	-0.092356	3.62364e-06
K	22	Sample X262		2381	2348	2325	2343	2351	2364	2364	2373	2381	2389						PO4-std	11	-0.0749356	-0.0794276	-0.0825475	-0.0801066	-0.07902	-0.077252	-0.077252	-0.0760263	-0.0749356	-0.0738438	4.25293e-06	-0.0800865	-3.44387e-06
L	22	Sample X286		2031	1892	1769	1762	1794	1834	1858	1861	1873	1882						PO4-std	11	-0.121648	-0.139646	-0.155319	-0.156204	-0.152152	-0.147066	-0.144002	-0.143618	-0.142082	-0.140929	-4.56483e-06	-0.141528	6.91771e-06
A	23	Sample X23		4162	4104	4060	3999	4017	4048	4062	4082	4073	4088						IRSp53-PDZ	12	0.198674	0.18868	0.181153	0.170794	0.173841	0.179108	0.181494	0.18491	0.183372	0.185937	-4.83e-06	0.185694	0
B	23	Sample X47		3294	3435	3402	3300	3317	3360	3343	3352	3376	3389						IRSp53-PDZ	12	0.0571954	0.0790512	0.0738988	0.058117	0.0607324	0.0673743	0.0647439	0.0661357	0.0698555	0.0718754	2.80085e-06	0.0652174	0
C	23	Sample X71		2964	2942	2972	2857	2764	2815	2829	2861	2880	2892						IRSp53-PDZ	12	0.00761788	0.00438862	0.00879446	-0.00800143	-0.021402	-0.0140733	-0.012053	-0.00742143	-0.00466233	-0.00291623	-1.23267e-05	0.00242317	0
D	23	Sample X95		3101	3075	3081	2908	2889	2928	2950	2969	2983	3007						IRSp53-SGS	12	0.0279382	0.0240536	0.0249488	-0.000583854	-0.00335301	0.00233846	0.00556182	0.00835309	0.0104143	0.0139565	-1.41495e-05	0.0198525	0
E	23	Sample X119		2874	2885	2891	2770	2813	2821	2835	2865	2855	2874						IRSp53-SGS	12	-0.00553436	-0.00393512	-0.00306185	-0.0205423	-0.0143616	-0.0132079	-0.011186	-0.00684113	-0.00829131	-0.00553436	-1.01855e-06	-0.00863845	0
F	23	Sample X143		3049	3060	2971	2942	2955	2974	2981	2984	2996	3003						IRSp53-SGS	12	0.0201823	0.0218185	0.00864732	0.00438862	0.0062957	0.00908879	0.0101196	0.0105616	0.0123316	0.0133653	-4.95976e-06	0.0146558	0
G	23	Sample X167		3003	3062	2896	2817	2832	2845	2866	2869	2872	2881						4ebp1-70-PDZ	12	0.0133653	0.0221163	-0.00233359	-0.0137849	-0.0116196	-0.00973961	-0.00669601	-0.00626054	-0.00582489	-0.00451693	-1.78291e-05	0.00816804	0
H	23	Sample X191		3012	3011	2884	2818	2824	2857	2857	2879	2889	2889						4ebp1-70-PDZ	12	0.0146959	0.0145479	-0.0040806	-0.0136406	-0.0127749	-0.00800143	-0.00800143	-0.00480772	-0.00335301	-0.00335301	-1.36208e-05	0.00529556	0
I	23	Sample X215		2732	2716	2658	2617	2625	2634	2649	2649	2665	2659						4ebp1-70-PDZ	12	-0.0259758	-0.0282557	-0.036481	-0.0422586	-0.0411337	-0.0398667	-0.0377518	-0.0377518	-0.0354915	-0.0363397	-6.84307e-06	-0.0320248	0
J	23	Sample X239		2587	2676	2717	2755	2605	2416	2436	2458	2465	2480						PYGM15	12	-0.0464671	-0.0339348	-0.0281133	-0.0226903	-0.0439439	-0.0701509	-0.0674073	-0.0643813	-0.0634167	-0.0613468	-3.44439e-05	-0.0295189	0
K	23	Sample X263		2424	2443	2435	2308	2285	2305	2299	2337	2346	2357						PYGM15	12	-0.0690543	-0.0664454	-0.0675446	-0.0848476	-0.0879518	-0.085253	-0.0860634	-0.0809208	-0.0796993	-0.0782044	-1.22706e-05	-0.0712361	0
L	23	Sample X287		1741	1763	1833	1860	1723	1699	1718	1734	1748	1753						PYGM15	12	-0.158854	-0.156077	-0.147193	-0.143746	-0.16112	-0.164135	-0.161749	-0.159736	-0.157971	-0.15734	-6.02898e-06	-0.153175	0
A	24	Sample X24		2864	2871	2891	2843	2873	2906	2935	2945	2954	2976						4ebp1-70-SGS	12	-0.00698624	-0.00597012	-0.00306185	-0.010029	-0.00567964	-0.000875667	0.00336307	0.00482843	0.00614888	0.00938321	1.59894e-05	-0.0104815	0
B	24	Sample X48		3213	3230	3359	3175	3156	3194	3237	3259	3263	3265						4ebp1-70-SGS	12	0.0448251	0.0474103	0.0672194	0.0390675	0.0361996	0.0419427	0.0484765	0.0518338	0.0524453	0.0527512	3.21323e-06	0.0462892	0
C	24	Sample X72		3195	3261	3367	3229	3143	3164	3190	3221	3223	3256						4ebp1-70-SGS	12	0.0420942	0.0521395	0.0684592	0.0472581	0.0342415	0.0374063	0.0413368	0.0460409	0.0463451	0.0513754	-4.22829e-06	0.0492067	0
D	24	Sample X96		2884	2895	2950	2780	2787	2801	2824	2850	2850	2857						L5A-PDZ	12	-0.0040806	-0.00247928	0.00556182	-0.019108	-0.0181028	-0.0160899	-0.0127749	-0.0090157	-0.0090157	-0.00800143	-6.71302e-06	-0.00528283	0
E	24	Sample X120		2903	2928	2948	2805	2808	2846	2866	2888	2909	2912						L5A-PDZ	12	-0.00131324	0.00233846	0.00526841	-0.0155141	-0.015082	-0.00959486	-0.00669601	-0.00349857	-0.000437919	0	-9.85305e-07	-0.0038618	0
F	24	Sample X144		3084	3092	3068	2978	2983	3010	3027	3040	3055	3046						L5A-PDZ	12	0.0253967	0.026592	0.02301	0.0096777	0.0104143	0.0144001	0.0169169	0.0188453	0.0210745	0.0197364	-4.27705e-06	0.0211726	0
G	24	Sample X168		2993	3116	3087	2974	2986	3022	3046	3057	3067	3065						L5A-SGS	12	0.0118888	0.0301853	0.0258448	0.00908879	0.0108564	0.016176	0.0197364	0.021372	0.022861	0.022563	3.01496e-06	0.0172483	0
H	24	Sample X192		3214	3257	3200	3151	3164	3191	3196	3211	3219	3226						L5A-SGS	12	0.044977	0.0515282	0.0428521	0.0354461	0.0374063	0.0414882	0.0422458	0.0445214	0.0457369	0.0468015	4.39795e-07	0.0430365	0
I	24	Sample X216		2859	2830	2770	2778	2792	2818	2827	2820	2835	2848						L5A-SGS	12	-0.00771147	-0.0119085	-0.0205423	-0.019395	-0.0173843	-0.0136406	-0.0123418	-0.0133521	-0.011186	-0.00930532	2.60437e-06	-0.0152394	0
J	24	Sample X240		2180	2174	2087	2122	2136	2131	2168	2171	2185	2191						PO4-std	12	-0.10201	-0.102808	-0.11431	-0.109698	-0.107847	-0.108509	-0.103605	-0.103207	-0.101345	-0.100546	4.87628e-06	-0.108314	0
K	24	Sample X264		2326	2296	2298	2330	2325	2338	2352	2350	2358	2365						PO4-std	12	-0.082412	-0.0864683	-0.0861984	-0.08187	-0.0825475	-0.0807852	-0.0788841	-0.0791559	-0.0780684	-0.0771159	7.6968e-06	-0.0859686	0
L	24	Sample X288		2019	1933	1774	1750	1774	1800	1813	1826	1839	1844						PO4-std	12	-0.123214	-0.134369	-0.154686	-0.157719	-0.154686	-0.151391	-0.149739	-0.148085	-0.146428	-0.14579	-1.14825e-05	-0.139721	0
[truncated: 10 more columns]
