# Supplementary material for: PDZ-directed substrate recruitment is the primary determinant of specific 4E-BP1 dephosphorylation by PP1-Neurabin
Source: eLife journal article supplement (doi:10.7554/elife.103403), 2024-11-20
Supplement: fig5-data1 [file Peptides with 1nM PP1 rep2.xlsx]

## Sheet: All Cycles
Well Row	Well Col	Content	Raw Data (425-10/460-20)	Raw Data (425-10/460-20)	Raw Data (425-10/460-20)	Raw Data (425-10/460-20)	Raw Data (425-10/460-20)	Raw Data (425-10/460-20)	Raw Data (425-10/460-20)	Raw Data (425-10/460-20)	Raw Data (425-10/460-20)	Raw Data (425-10/460-20)							Well Col
		Time [s]	0	120	240	360	480	600	720	840	960	1080			12.8	12105.2	11956.5			60	180	300	420	540	660	780	900	1020	1140	Rates	const…	Norm. rate			IRSp53-PDZ			IRSp53-SGS			4ebp1-70-PDZ			4ebp1-70-SGS			L5A-PDZ
A	1	Sample X1	4193	4276	4433	4593	4771	4903	5032	5147	5319	5493			6.4	11342.7	12196.8	IRSp53-PDZ	1	0.20405	0.21856	0.246482	0.275598	0.3088	0.333993	0.359099	0.381897	0.41675	0.452963	0.000231329	0.181022	0.000231343		200	0.000231343	0.000239503	0.00023921	0.000226424	0.000238836	0.000198273	0.000331441	0.000459755	0.00038044	0.000111456	2.07634e-05	2.09572e-05	0.000117289	0.000125048	0.000105834
B	1	Sample X25	3840	3990	4202	4347	4513	4645	4814	4978	5137	5309			3.2	14212.9	12085	IRSp53-PDZ	1	0.144204	0.169273	0.205615	0.231109	0.260955	0.285208	0.316953	0.348531	0.379899	0.414698	0.000247737	0.127002	0.000239503		100	0.000201298	0.000217041	0.000199231	0.000241954	0.000176553	0.000198651	0.000330795	0.000447835	0.000401549	-3.08381e-05	4.16422e-05	-5.45059e-05	7.86788e-05	6.75987e-05	7.56359e-05
C	1	Sample X49	3663	3835	4042	4192	4351	4514	4648	4793	4961	5142			1.6	7925.2	7847.4	IRSp53-PDZ	1	0.115285	0.143377	0.178087	0.203876	0.23182	0.261137	0.285764	0.312965	0.345221	0.380897	0.00024004	0.101819	0.00023921		50	8.46802e-05	7.28959e-05	7.18419e-05	1.50194e-05	4.85949e-05	2.55634e-05	0.000121653	0.000152737	0.000155833	-0.000184904	-1.83343e-05	-1.13739e-05	4.22097e-05	1.87699e-05	7.96111e-06
D	1	Sample X73	2691	2993	3236	3427	3595	3739	3901	4077	4259	4459			0.8	6824.3	7018.3	IRSp53-SGS	1	-0.0318086	0.0118888	0.0483241	0.0778	0.104361	0.127616	0.154335	0.184055	0.215574	0.251168	0.000247682	-0.0342777	0.000226424		25	2.95764e-05	2.99225e-05	4.64445e-05	-1.40322e-05	1.21095e-05	-1.24363e-05	5.12098e-05	7.61083e-05	6.63274e-05	3.90533e-05	-3.97279e-05	-3.34489e-05	6.35373e-06	5.74081e-06	4.73427e-06
E	1	Sample X97	3356	3440	3548	3915	4062	4117	4217	4448	4556	5070			0.4	2629	5096.4	IRSp53-SGS	1	0.0667548	0.0798338	0.096869	0.156673	0.181494	0.190913	0.208228	0.249183	0.268805	0.366589	0.000249846	0.0366265	0.000238836		12.5	1.95381e-05	2.34649e-05	9.49509e-06	-1.58232e-05	-5.43232e-06	-1.28427e-06	9.97273e-06	4.92173e-05	3.10907e-05	-2.76305e-05	-1.84625e-05	2.36433e-05	9.12607e-06	-6.78224e-06	4.92812e-06
F	1	Sample X121	2809	3011	3231	3370	3529	3664	3788	3919	4069	4202			0.2	3914.2	4074.1	IRSp53-SGS	1	-0.014938	0.0145479	0.0475625	0.0689244	0.093854	0.115447	0.135635	0.157342	0.182688	0.205615	0.000198615	-0.0185013	0.000198273		6.25	8.24127e-06	4.66245e-06	1.82247e-05	-4.46007e-05	-2.66514e-06	4.2011e-06	-6.47266e-06	2.58642e-06	1.36693e-05	-3.3296e-05	-2.59524e-05	6.67466e-06	-2.56873e-06	-4.02944e-06	3.10176e-05
G	1	Sample X145	2846	3102	3354	3583	3822	4090	4316	4571	4799	5012			0.1	3256	3369.1	4ebp1-70-PDZ	1	-0.00959486	0.0280878	0.0664452	0.102443	0.141231	0.18628	0.225614	0.271554	0.314103	0.355175	0.000339654	-0.0356583	0.000331441		3.125	-8.38884e-06	3.936e-07	-6.13809e-06	-3.77033e-05	-7.72002e-06	-1.12638e-05	-9.19778e-06	1.09529e-05	3.11533e-06	-1.66377e-05	-1.61954e-05	-1.20672e-05	1.50372e-05	1.60767e-05	1.44241e-05
H	1	Sample X169	2978	3346	3665	3979	4285	4596	4937	5211	5494	5744			0.05	3039.5	3038.1	4ebp1-70-PDZ	1	0.0096777	0.0652076	0.115608	0.167416	0.220143	0.27615	0.340563	0.394758	0.453174	0.506974	0.000462759	-0.0226881	0.000459755		1.5625	-2.65421e-06	-4.05766e-06	-2.41381e-06	-2.78313e-05	-1.0591e-05	5.72808e-06	-7.13764e-06	2.48164e-07	1.12507e-05	-1.12404e-05	-1.22409e-05	-5.60393e-06	9.63489e-06	4.43352e-06	1.16913e-05
I	1	Sample X193	2645	2986	3279	3568	3871	4156	4446	4678	4902	5113			0.025	2635.2	2854.5	4ebp1-70-PDZ	1	-0.0383162	0.0108564	0.0548945	0.100051	0.149342	0.197637	0.248823	0.291345	0.333801	0.375115	0.000386785	-0.0597165	0.00038044		0.78125	-9.62411e-06	-7.9566e-06	-9.50615e-06	-1.99894e-05	-2.45778e-05	-4.86111e-06	-2.10442e-05	-1.35319e-05	-7.47138e-06	-2.34079e-05	-3.13904e-05	1.88292e-05	7.4972e-06	-2.56992e-06	7.83598e-06
J	1	Sample X217	57	54	53	56	54	55	56	55	58	54			0.0125	2766.5	2816.2	-	1	-0.351486	-0.351797	-0.351901	-0.35159	-0.351797	-0.351694	-0.35159	-0.351694	-0.351382	-0.351797	6.29046e-08	-0.35171	-3.60087e-06		0.390625	-6.99708e-06	-9.25019e-06	6.45475e-06	-1.88789e-05	-1.83944e-05	-7.2747e-06	-1.99705e-05	-2.47578e-06	-4.88387e-06	5.07523e-06	-2.00114e-05	1.31857e-06	1.05739e-05	8.52934e-06	6.43844e-06
K	1	Sample X241	11138	10993	10877	10814	10762	10776	10795	10773	10777	10770			0	2579.6	2647.2	-	1	2.58663	2.49039	2.41612	2.37675	2.34475	2.35332	2.36501	2.35148	2.35394	2.34964	-0.000173633	2.50298	-0.000176528		0.195312	-2.35737e-06	7.2539e-07	2.6067e-06	-2.0032e-05	-1.36041e-05	-5.14156e-06	-1.02792e-05	1.41676e-06	-7.06973e-06	2.56368e-06	-5.97028e-06	3.73157e-06	5.71642e-06	2.72995e-06	5.76498e-08
L	1	Sample X265	11064	10869	10780	10701	10612	10573	10494	10443	10425	10350						-	1	2.53703	2.41108	2.35578	2.30778	2.25489	2.23209	2.18663	2.15776	2.14767	2.10609	-0.000358521	2.48479	-0.000369235		0	0	0	0	0	0	0	0	0	0	0	0	0	0	0	0
A	2	Sample X2	3724	3798	3868	3945	4022	4121	4206	4282	4352	4445						4ebp1-70-SGS	1	0.125172	0.137278	0.148844	0.161697	0.174689	0.191601	0.206311	0.219615	0.231998	0.248643	0.000115095	0.115528	0.000111456
B	2	Sample X26	3200	3148	3184	3221	3223	3215	3244	3304	3385	3465						4ebp1-70-SGS	1	0.0428521	0.0349942	0.0404285	0.0460409	0.0463451	0.0451289	0.0495437	0.0587319	0.0712535	0.083755	3.65025e-05	0.0300059	2.07634e-05		*1000000
C	2	Sample X50	3489	3418	3401	3418	3458	3505	3496	3497	3519	3584						4ebp1-70-SGS	1	0.0875319	0.0763941	0.0737431	0.0763941	0.0826558	0.0900566	0.0886358	0.0887936	0.0922703	0.102603	1.84926e-05	0.0748123	2.09572e-05			IRSp53-PDZ			IRSp53-SGS			4ebp1-70-PDZ			4ebp1-70-SGS			L5A-PDZ
D	2	Sample X74	2905	3146	3225	3306	3385	3475	3553	3638	3727	3825						L5A-PDZ	1	-0.00102155	0.034693	0.0466493	0.0590394	0.0712535	0.0853272	0.0976637	0.111257	0.125661	0.141726	0.000119923	0.00527075	0.000117289		200	0.0138806	0.0143702	0.0143526	0.0135854	0.0143301	0.0118964	0.0198864	0.0275853	0.0228264	0.00668736	0.00124581	0.00125743	0.00703735	0.0075029	0.00635004
E	2	Sample X98	3105	3330	3436	3531	3600	3682	3779	3854	3967	4050						L5A-PDZ	1	0.028537	0.0627364	0.0792077	0.094171	0.105161	0.118356	0.134158	0.146522	0.165395	0.179448	0.000128613	0.0342013	0.000125048		100	0.0120779	0.0130225	0.0119538	0.0145172	0.0105932	0.0119191	0.0198477	0.0268701	0.0240929	-0.00185028	0.00249853	-0.00327035	0.00472073	0.00405592	0.00453815
F	2	Sample X122	3248	3398	3459	3541	3603	3654	3741	3828	3922	4011						L5A-PDZ	1	0.0501539	0.0732759	0.0828127	0.0957573	0.105641	0.113834	0.127942	0.142221	0.157843	0.172824	0.000105949	0.048661	0.000105834		50	0.00508081	0.00437375	0.00431052	0.000901165	0.0029157	0.0015338	0.00729919	0.00916421	0.00934999	-0.0110942	-0.00110006	-0.000682433	0.00253258	0.0011262	0.000477667
G	2	Sample X146	2693	2931	3035	3145	3247	3386	3518	3642	3779	3902						L5A-SGS	1	-0.0315248	0.00277747	0.0181032	0.0345425	0.0500013	0.071409	0.092112	0.111901	0.134158	0.154502	0.000164495	-0.0348991	0.000206676		25	0.00177458	0.00179535	0.00278667	-0.000841931	0.000726571	-0.000746176	0.00307259	0.0045665	0.00397964	0.0023432	-0.00238367	-0.00200693	0.000381224	0.000344449	0.000284056
H	2	Sample X170	2875	2982	3071	3182	3285	3395	3491	3614	3736	3879						L5A-SGS	1	-0.00538907	0.0102669	0.0234571	0.0401259	0.0558143	0.0728088	0.0878472	0.107403	0.127127	0.150672	0.000141538	-0.0179096	0.000124645		12.5	0.00117229	0.0014079	0.000569705	-0.000949392	-0.000325939	-7.70564e-05	0.000598364	0.00295304	0.00186544	-0.00165783	-0.00110775	0.0014186	0.000547564	-0.000406934	0.000295687
I	2	Sample X194	2649	2779	2895	2998	3097	3230	3362	3478	3593	3752						L5A-SGS	1	-0.0377518	-0.0192515	-0.00247928	0.0126269	0.0273397	0.0474103	0.0676842	0.0857993	0.104041	0.129738	0.000151368	-0.0493053	0.000144843		6.25	0.000494476	0.000279747	0.00109348	-0.00267604	-0.000159908	0.000252066	-0.00038836	0.000155185	0.000820159	-0.00199776	-0.00155714	0.00040048	-0.000154124	-0.000241766	0.00186105
J	2	Sample X218	11839	11765	11904	12015	12116	12195	12244	12295	12325	12354						PO4-std	1	3.11313	3.0522	3.16783	3.26386	3.35425	3.42705	3.47316	3.52196	3.55106	3.57947	0.000513153	3.04251	0.000510058		3.125	-0.00050333	2.3616e-05	-0.000368285	-0.0022622	-0.000463201	-0.000675828	-0.000551867	0.000657173	0.00018692	-0.000998261	-0.000971723	-0.000724031	0.000902231	0.0009646	0.000865448
K	2	Sample X242	12056	11883	11857	11858	11865	11948	11966	12018	12036	12078						PO4-std	1	3.3002	3.15004	3.12817	3.12901	3.13488	3.20549	3.22105	3.2665	3.28241	3.3199	0.0001082	3.14885	0.000112795		1.5625	-0.000159252	-0.00024346	-0.000144829	-0.00166988	-0.000635459	0.000343685	-0.000428258	1.48899e-05	0.000675045	-0.000674426	-0.000734457	-0.000336236	0.000578093	0.000266011	0.00070148
L	2	Sample X266	11656	11410	11477	11535	11575	11627	11669	11712	11754	11811						PO4-std	1	2.96492	2.77814	2.82767	2.87135	2.9019	2.94218	2.97518	3.0094	3.04326	3.08991	0.000214196	2.81187	0.000212745		0.78125	-0.000577446	-0.000477396	-0.000570369	-0.00119937	-0.00147467	-0.000291666	-0.00126265	-0.000811912	-0.000448283	-0.00140448	-0.00188342	0.00112975	0.000449832	-0.000154195	0.000470159
A	3	Sample X3	5286	5407	5504	5608	5635	5612	5642	5862	6174	6468						IRSp53-PDZ	2	0.409991	0.434942	0.455285	0.477443	0.483255	0.478303	0.484766	0.533121	0.604713	0.67564	0.000201284	0.382975	0.000201298		0.390625	-0.000419825	-0.000555011	0.000387285	-0.00113274	-0.00110366	-0.000436482	-0.00119823	-0.000148547	-0.000293032	0.000304514	-0.00120068	7.9114e-05	0.000634436	0.00051176	0.000386307
B	3	Sample X27	4705	4855	5028	5184	5293	5419	5505	5598	5746	5981						IRSp53-PDZ	2	0.296388	0.324775	0.358314	0.389317	0.411422	0.437442	0.455497	0.475297	0.507413	0.559998	0.000225275	0.286421	0.000217041		0.195312	-0.000141442	4.35234e-05	0.000156402	-0.00120192	-0.000816245	-0.000308493	-0.000616755	8.50057e-05	-0.000424184	0.000153821	-0.000358217	0.000223894	0.000342985	0.000163797	3.45899e-06
C	3	Sample X51	4631	4725	4892	5015	5157	5264	5361	5435	5569	5736						IRSp53-PDZ	2	0.282613	0.300136	0.331875	0.355763	0.383898	0.405505	0.425402	0.440783	0.469092	0.505219	0.000200061	0.269992	0.000199231		0	0	0	0	0	0	0	0	0	0	0	0	0	0	0	0
D	3	Sample X75	3956	4195	4394	4527	4610	4733	4899	5100	5333	5599						IRSp53-SGS	2	0.163544	0.204397	0.239487	0.263506	0.278732	0.301639	0.333223	0.372532	0.419628	0.475511	0.000263212	0.147293	0.000241954
E	3	Sample X99	4054	4186	4310	4379	4444	4535	4707	4883	5015	5204						IRSp53-SGS	2	0.18013	0.202834	0.224553	0.236807	0.248462	0.264965	0.296762	0.330144	0.355763	0.393345	0.000187564	0.160838	0.000176553
F	3	Sample X123	3986	4157	4315	4431	4525	4624	4747	4898	5062	5213						IRSp53-SGS	2	0.168597	0.19781	0.225437	0.246123	0.263141	0.281318	0.304273	0.33303	0.365008	0.395162	0.000198993	0.158594	0.000198651
G	3	Sample X147	3936	4159	4370	4561	4741	4962	5193	5415	5609	5855						4ebp1-70-PDZ	2	0.160188	0.198155	0.235202	0.26972	0.303143	0.345416	0.391128	0.436608	0.477658	0.531556	0.000339008	0.131473	0.000330795
H	3	Sample X171	3980	4259	4569	4833	5085	5326	5569	5830	6144	6428						4ebp1-70-PDZ	2	0.167585	0.215574	0.271187	0.320572	0.369557	0.418188	0.469092	0.525981	0.597669	0.665783	0.000450839	0.131615	0.000447835
I	3	Sample X195	3706	3989	4252	4517	4718	4938	5208	5499	5774	6023						4ebp1-70-PDZ	2	0.122246	0.169104	0.214346	0.261684	0.298823	0.340757	0.394153	0.454229	0.513575	0.569609	0.000407895	0.0891157	0.000401549
J	3	Sample X219	13121	13075	13069	13040	13018	12961	12934	12843	12867	12858						-	2	4.44697	4.38772	4.38007	4.34334	4.31574	4.24531	4.21247	4.1042	4.1324	4.1218	-0.000331121	4.46768	-0.000334785
K	3	Sample X243	13355	13361	13289	13197	13146	13113	13104	13049	13015	12875						-	2	4.76556	4.77413	4.67267	4.54722	4.47962	4.43659	4.42495	4.3547	4.312	4.14186	-0.000547877	4.81966	-0.000550773
L	3	Sample X267	18688	18562	18503	18393	18323	18171	18185	18060	18017	18064						-	2	-84.2138	-119.345	-148.745	-277.667	-628.208	352.687	412.555	163.278	134.922	166.523	0.436777	-264.887	0.436766
A	4	Sample X4	10327	10352	10406	10408	10407	10341	10332	10292	10311	10346						4ebp1-70-SGS	2	2.09349	2.10719	2.13706	2.13817	2.13761	2.10115	2.09622	2.07447	2.08478	2.10389	-2.7199e-05	2.12372	-3.08381e-05
B	4	Sample X28	4978	5038	5079	5162	5187	5151	5126	5197	5282	5368						4ebp1-70-SGS	2	0.348531	0.360279	0.368369	0.3849	0.38992	0.382697	0.377704	0.391934	0.409174	0.426849	5.73813e-05	0.349607	4.16422e-05
C	4	Sample X52	5077	5047	5084	5051	5071	4955	4822	4716	4796	4919						4ebp1-70-SGS	2	0.367973	0.362051	0.369359	0.362839	0.366786	0.344055	0.318475	0.298448	0.313534	0.337081	-5.69706e-05	0.378242	-5.45059e-05
D	4	Sample X76	4397	4467	4515	4555	4604	4647	4705	4763	4819	4895						L5A-PDZ	2	0.240024	0.252613	0.261319	0.268621	0.277625	0.285579	0.296388	0.307289	0.317904	0.332452	8.13131e-05	0.235194	7.86788e-05
E	4	Sample X100	4931	4891	4849	4797	4791	4842	4912	5028	5190	5347						L5A-PDZ	2	0.339402	0.331683	0.323627	0.313724	0.312586	0.32229	0.335729	0.358314	0.390524	0.422511	7.11633e-05	0.302341	6.75987e-05
F	4	Sample X124	4414	4430	4458	4532	4558	4576	4634	4693	4786	4872						L5A-PDZ	2	0.243069	0.245943	0.250987	0.264418	0.269171	0.272472	0.283169	0.294144	0.311638	0.328032	7.57511e-05	0.230854	7.56359e-05
G	4	Sample X148	3876	4094	4141	4219	4324	4442	4632	4832	5008	5138						L5A-SGS	2	0.150173	0.186965	0.195046	0.208577	0.22703	0.248102	0.282798	0.320381	0.354392	0.380098	0.000207663	0.130758	0.000249843
H	4	Sample X172	4095	4162	4169	4221	4273	4326	4411	4544	4683	4821						L5A-SGS	2	0.187137	0.198674	0.199886	0.208926	0.218032	0.227384	0.242531	0.266609	0.292277	0.318285	0.000115118	0.166903	9.82246e-05
I	4	Sample X196	4051	4151	4209	4225	4222	4262	4340	4483	4614	4735						L5A-SGS	2	0.179619	0.196773	0.206834	0.209624	0.2091	0.2161	0.229866	0.255508	0.27947	0.302015	0.000100583	0.168141	9.40577e-05
J	4	Sample X220	11622	11440	11366	11356	11361	11296	11238	11245	11251	11252						PO4-std	2	2.93828	2.8002	2.74614	2.73892	2.74253	2.69606	2.65532	2.6602	2.66439	2.66509	-0.000208908	2.85606	-0.000212003
K	4	Sample X244	12269	12184	12165	12133	12175	12171	12165	12181	12253	12272						PO4-std	2	3.49698	3.4168	3.39918	3.36976	3.40844	3.40474	3.39918	3.41401	3.48172	3.49985	3.227e-05	3.40971	3.68651e-05
L	4	Sample X268	12274	12070	11929	11818	11796	11818	11833	11856	11868	11917						PO4-std	2	3.50177	3.31272	3.18916	3.0957	3.07755	3.0957	3.10814	3.12733	3.1374	3.1789	-0.000221553	3.31537	-0.000223004
A	5	Sample X5	3862	3951	4040	4088	4048	3983	4064	4224	4380	4515						IRSp53-PDZ	3	0.147848	0.162704	0.177746	0.185937	0.179108	0.168091	0.181835	0.209449	0.236986	0.261319	8.46667e-05	0.140302	8.46802e-05
B	5	Sample X29	3628	3674	3756	3810	3844	3861	3864	3958	4103	4231						IRSp53-PDZ	3	0.10965	0.117062	0.130392	0.139253	0.144866	0.147682	0.14818	0.163881	0.188508	0.210672	8.11295e-05	0.101337	7.28959e-05
C	5	Sample X53	3294	3329	3409	3484	3541	3551	3545	3623	3724	3852						IRSp53-PDZ	3	0.0571954	0.0625821	0.0749898	0.086744	0.0957573	0.0973458	0.0963924	0.108847	0.125172	0.14619	7.26719e-05	0.0515185	7.18419e-05
D	5	Sample X77	3912	3952	3968	3942	3887	3806	3852	4008	4127	4259						IRSp53-SGS	3	0.156172	0.162872	0.165563	0.161194	0.152003	0.138594	0.14619	0.172316	0.192633	0.215574	3.62776e-05	0.144545	1.50194e-05
E	5	Sample X101	3331	3392	3457	3520	3494	3501	3562	3639	3710	3792						IRSp53-SGS	3	0.0628907	0.072342	0.0824988	0.0924285	0.0883203	0.0894249	0.0990956	0.111418	0.122896	0.136292	5.96054e-05	0.0599974	4.85949e-05
F	5	Sample X125	3538	3583	3665	3699	3698	3661	3606	3667	3737	3805						IRSp53-SGS	3	0.0952812	0.102443	0.115608	0.12111	0.120948	0.114963	0.106121	0.115931	0.12729	0.13843	2.59052e-05	0.100269	2.55634e-05
G	5	Sample X149	3174	3287	3359	3438	3488	3591	3713	3846	3952	4064						4ebp1-70-PDZ	3	0.0389164	0.0561211	0.0672194	0.0795207	0.0873743	0.103721	0.123383	0.145197	0.162872	0.181835	0.000129866	0.0266964	0.000121653
H	5	Sample X173	3186	3328	3439	3535	3617	3676	3782	3942	4118	4305						4ebp1-70-PDZ	3	0.0407312	0.0624278	0.0796773	0.0948053	0.107884	0.117385	0.13465	0.161194	0.191085	0.22367	0.000155741	0.0279065	0.000152737
I	5	Sample X197	2849	2980	3063	3121	3228	3377	3528	3688	3833	3975						4ebp1-70-PDZ	3	-0.00916052	0.00997227	0.0222652	0.0309354	0.0471059	0.0700107	0.0936955	0.119327	0.143047	0.166742	0.000162179	-0.0279133	0.000155833
J	5	Sample X221	11492	11625	11654	11731	11742	11745	11790	11764	11798	11814						-	3	2.8389	2.94062	2.96335	3.02466	3.03354	3.03596	3.07263	3.05138	3.0792	3.09239	0.000193838	2.89696	0.000190174
K	5	Sample X245	10788	10890	10947	11011	11012	11037	11061	11070	11057	11065						-	3	2.36069	2.42433	2.46066	2.50213	2.50278	2.51919	2.53504	2.54102	2.53239	2.5377	0.000144769	2.40473	0.000141874
L	5	Sample X269	15843	15899	15917	15876	15933	15919	15929	15889	15877	15924						-	3	11.9552	12.2908	12.402	12.151	12.5024	12.4145	12.4772	12.2297	12.1571	12.4458	0.000177179	12.1963	0.000166465
A	6	Sample X6	9117	8752	8597	8272	7946	8045	8198	8365	8407	8468						4ebp1-70-SGS	3	1.52023	1.37592	1.31794	1.20219	1.09341	1.12572	1.17688	1.23454	1.24934	1.27108	-0.000181264	1.36548	-0.000184904
B	6	Sample X30	3944	3924	3992	3968	3898	3788	3842	3898	3956	3991						4ebp1-70-SGS	3	0.161529	0.158178	0.169611	0.165563	0.153835	0.135635	0.144535	0.153835	0.163544	0.169442	-2.59515e-06	0.159128	-1.83343e-05
C	6	Sample X54	3714	3682	3686	3718	3690	3625	3570	3582	3626	3683						4ebp1-70-SGS	3	0.123546	0.118356	0.119003	0.124196	0.119651	0.109168	0.10037	0.102284	0.109329	0.118518	-1.38385e-05	0.122745	-1.13739e-05
D	6	Sample X78	3100	3163	3213	3216	3237	3252	3305	3354	3396	3453						L5A-PDZ	3	0.0277885	0.0372553	0.0448251	0.0452809	0.0484765	0.0507645	0.0588857	0.0664452	0.0729645	0.0818712	4.4844e-05	0.0265493	4.22097e-05
E	6	Sample X102	3491	3541	3586	3604	3588	3566	3557	3589	3644	3734						L5A-PDZ	3	0.0878472	0.0957573	0.102922	0.105801	0.103242	0.0997326	0.0982999	0.103402	0.112223	0.126801	2.23346e-05	0.090202	1.87699e-05
F	6	Sample X126	3404	3419	3456	3476	3455	3440	3394	3417	3457	3538						L5A-PDZ	3	0.0742104	0.0765502	0.0823419	0.0854846	0.082185	0.0798338	0.0726532	0.076238	0.0824988	0.0952812	8.07637e-06	0.0758819	7.96111e-06
G	6	Sample X150	3143	3218	3251	3282	3304	3339	3397	3453	3496	3534						L5A-SGS	3	0.0342415	0.0455849	0.0506118	0.0553543	0.0587319	0.0641258	0.0731202	0.0818712	0.0886358	0.0946467	5.35349e-05	0.0325714	9.57151e-05
H	6	Sample X174	3115	3189	3238	3247	3276	3262	3243	3283	3345	3418						L5A-SGS	3	0.0300354	0.0411854	0.0486289	0.0500013	0.0544349	0.0522924	0.0493911	0.0555076	0.065053	0.0763941	3.10466e-05	0.0336645	1.41531e-05
I	6	Sample X198	3330	3364	3380	3272	3135	3123	3167	3245	3302	3364						L5A-SGS	3	0.0627364	0.0679941	0.0704766	0.0538224	0.0330381	0.0312355	0.0378591	0.0496962	0.0584244	0.0679941	-8.75064e-06	0.0585781	-1.52762e-05
J	6	Sample X222	14364	14249	14276	14241	14182	14168	14149	14117	14218	14165						PO4-std	3	6.57669	6.32435	6.38229	6.30733	6.18388	6.15511	6.11638	6.05194	6.25878	6.14897	-0.000331403	6.44941	-0.000334498
K	6	Sample X246	12194	12167	12095	12043	12047	12020	12041	12042	12082	12119						PO4-std	3	3.42612	3.40103	3.33522	3.28863	3.29218	3.26827	3.28685	3.28774	3.32349	3.35698	-7.23039e-05	3.37003	-6.77088e-05
L	6	Sample X270	11696	11663	11544	11552	11519	11568	11624	11635	11672	11699						PO4-std	3	2.99661	2.97044	2.87819	2.88429	2.85922	2.89653	2.93984	2.94843	2.97755	2.999	3.16419e-05	2.91603	3.01909e-05
A	7	Sample X7	3616	3636	3687	3658	3563	3504	3588	3709	3809	3897						IRSp53-PDZ	4	0.107724	0.110935	0.119165	0.114479	0.0992548	0.0898987	0.103242	0.122733	0.139088	0.153668	2.95629e-05	0.0982811	2.95764e-05
B	7	Sample X31	3384	3377	3395	3416	3418	3413	3432	3521	3599	3668						IRSp53-PDZ	4	0.0710981	0.0700107	0.0728088	0.0760819	0.0763941	0.0756137	0.0785818	0.0925868	0.105001	0.116093	3.8156e-05	0.0605333	2.99225e-05
C	7	Sample X55	3421	3460	3526	3583	3604	3583	3582	3657	3727	3793						IRSp53-PDZ	4	0.0768625	0.0829697	0.0933786	0.102443	0.105801	0.102443	0.102284	0.114317	0.125661	0.136456	4.72745e-05	0.075897	4.64445e-05
D	7	Sample X79	3383	3406	3430	3383	3322	3265	3293	3376	3442	3522						IRSp53-SGS	4	0.0709427	0.0745221	0.078269	0.0709427	0.0615027	0.0527512	0.0570419	0.0698555	0.080147	0.0927452	7.22599e-06	0.0665364	-1.40322e-05
E	7	Sample X103	3065	3063	3097	3110	3063	3075	3128	3162	3214	3242						IRSp53-SGS	4	0.022563	0.0222652	0.0273397	0.0292859	0.0222652	0.0240536	0.0319863	0.0371045	0.044977	0.0492387	2.312e-05	0.0172359	1.21095e-05
F	7	Sample X127	3348	3357	3391	3409	3399	3343	3267	3252	3306	3346						IRSp53-SGS	4	0.0655169	0.0669097	0.0721865	0.0749898	0.0734316	0.0647439	0.0530571	0.0507645	0.0590394	0.0652076	-1.20945e-05	0.0718414	-1.24363e-05
G	7	Sample X151	2979	3005	3015	2993	3048	3131	3190	3245	3318	3399						4ebp1-70-PDZ	4	0.00982497	0.0136609	0.0151397	0.0118888	0.0200336	0.0324369	0.0413368	0.0496962	0.0608864	0.0734316	5.94226e-05	-0.00281997	5.12098e-05
H	7	Sample X175	2911	2982	3052	3078	3097	3124	3206	3324	3423	3518						4ebp1-70-PDZ	4	-0.000145992	0.0102669	0.0206283	0.0245011	0.0273397	0.0313856	0.0437623	0.061811	0.0771749	0.092112	7.91122e-05	-0.00858373	7.61083e-05
I	7	Sample X199	2602	2665	2727	2757	2778	2841	2919	2993	3100	3155						4ebp1-70-PDZ	4	-0.0443649	-0.0354915	-0.0266888	-0.0224041	-0.019395	-0.0103184	0.00102248	0.0118888	0.0277885	0.0360488	7.26731e-05	-0.0517953	6.63274e-05
J	7	Sample X223	11752	11889	11911	11956	11975	11985	11992	11990	11993	11988						-	4	3.04163	3.15511	3.17379	3.2124	3.22886	3.23757	3.24368	3.24194	3.24456	3.24019	0.000144267	3.11541	0.000140603
K	7	Sample X247	11268	11442	11493	11495	11552	11532	11537	11574	11545	11607						-	4	2.67631	2.80168	2.83965	2.84115	2.88429	2.86907	2.87286	2.90114	2.87895	2.92662	0.00016066	2.75277	0.000157764
L	7	Sample X271	15522	15588	15644	15735	15725	15713	15677	15655	15894	16292						-	4	10.2956	10.6043	10.8785	11.3498	11.2964	11.2328	11.0456	10.9337	12.2602	15.1812	0.00277076	9.84535	0.00276005
A	8	Sample X8	6060	6128	6321	6376	6303	6238	6266	6271	6341	6363						4ebp1-70-SGS	4	0.57813	0.593927	0.63974	0.653068	0.635405	0.619858	0.626535	0.62773	0.644573	0.649907	4.26924e-05	0.601272	3.90533e-05
B	8	Sample X32	3574	3509	3519	3558	3475	3313	3329	3386	3434	3465						4ebp1-70-SGS	4	0.101007	0.0906887	0.0922703	0.098459	0.0853272	0.0601165	0.0625821	0.071409	0.0788947	0.083755	-2.39888e-05	0.0968443	-3.97279e-05
C	8	Sample X56	3523	3486	3487	3500	3429	3276	3239	3277	3330	3358						4ebp1-70-SGS	4	0.0929035	0.0870591	0.0872167	0.0892671	0.0781127	0.0544349	0.0487813	0.0545881	0.0627364	0.0670645	-3.59135e-05	0.0937645	-3.34489e-05
D	8	Sample X80	2842	2880	2912	2917	2888	2865	2867	2896	2940	2959						L5A-PDZ	4	-0.0101737	-0.00466233	0	0.000730246	-0.00349857	-0.00684113	-0.00655087	-0.00233359	0.00409551	0.00688314	8.98802e-06	-0.00762795	6.35373e-06
E	8	Sample X104	3200	3216	3205	3157	3099	3108	3170	3202	3254	3301						L5A-PDZ	4	0.0428521	0.0452809	0.0436106	0.0363503	0.0276389	0.0289863	0.0383121	0.0431554	0.0510699	0.0582707	9.30544e-06	0.0359695	5.74081e-06
F	8	Sample X128	3036	3074	3084	3068	3031	2981	3002	3051	3083	3146						L5A-PDZ	4	0.0182516	0.0239044	0.0253967	0.02301	0.0175099	0.0101196	0.0132176	0.0204796	0.0252474	0.034693	4.84953e-06	0.0182733	4.73427e-06
G	8	Sample X152	2946	2969	2958	2931	2953	3004	3032	3065	3091	3127						L5A-SGS	4	0.00497507	0.00835309	0.00673625	0.00277747	0.00600209	0.0135131	0.0176582	0.022563	0.0264425	0.0318361	2.52355e-05	-0.00105559	6.74157e-05
H	8	Sample X176	2913	2958	2946	2900	2867	2901	2963	3011	3052	3085						L5A-SGS	4	0.000146011	0.00673625	0.00497507	-0.00175065	-0.00655087	-0.00160487	0.00747089	0.0145479	0.0206283	0.0255461	2.05212e-05	-0.00529831	3.6277e-06
I	8	Sample X200	3051	3025	2933	2761	2600	2646	2733	2835	2918	2983						L5A-SGS	4	0.0204796	0.0166205	0.00307023	-0.0218316	-0.0446454	-0.0381751	-0.0258332	-0.011186	0.000876352	0.0104143	-1.40208e-05	-0.000608528	-2.05464e-05
J	8	Sample X224	7749	7875	7885	7864	7913	7951	7967	7983	8005	8060						PO4-std	4	1.03095	1.07063	1.07382	1.06713	1.08279	1.09503	1.10021	1.10541	1.11259	1.13066	7.37697e-05	1.04266	7.06746e-05
K	8	Sample X248	7745	7730	7727	7763	7822	7869	7904	7950	7979	7985						PO4-std	4	1.02971	1.02505	1.02412	1.03531	1.05382	1.06872	1.0799	1.09471	1.10411	1.10606	8.79948e-05	1.00935	9.25899e-05
L	8	Sample X272	7930	7932	7981	7997	7999	8030	8043	8069	8044	8086						PO4-std	4	1.08825	1.0889	1.10476	1.10998	1.11063	1.12078	1.12506	1.13364	1.12539	1.13928	4.61821e-05	1.08696	4.47311e-05
A	9	Sample X9	3435	3475	3525	3486	3383	3366	3464	3524	3576	3637						IRSp53-PDZ	5	0.0790512	0.0853272	0.0932202	0.0870591	0.0709427	0.0683041	0.0835979	0.0930619	0.101326	0.111096	1.95246e-05	0.075584	1.95381e-05
B	9	Sample X33	3241	3227	3300	3360	3338	3301	3358	3410	3436	3473						IRSp53-PDZ	5	0.0490862	0.0469537	0.058117	0.0673743	0.0639713	0.0582707	0.0670645	0.0751458	0.0792077	0.0850126	3.16985e-05	0.0460013	2.34649e-05
C	9	Sample X57	2894	2879	2925	2950	2951	2865	2857	2919	2971	3021						IRSp53-PDZ	5	-0.00262495	-0.00480772	0.00189963	0.00556182	0.00570856	-0.00684113	-0.00800143	0.00102248	0.00864732	0.0160279	1.03251e-05	-0.00453578	9.49509e-06
D	9	Sample X81	3388	3391	3403	3390	3347	3301	3328	3386	3425	3473						IRSp53-SGS	5	0.0717199	0.0721865	0.0740546	0.0720309	0.0653622	0.0582707	0.0624278	0.071409	0.0774874	0.0850126	5.43497e-06	0.0677352	-1.58232e-05
E	9	Sample X105	2918	2911	2940	2969	2917	2869	2893	2942	2960	2993						IRSp53-SGS	5	0.000876352	-0.000145992	0.00409551	0.00835309	0.000730246	-0.00626054	-0.0027706	0.00438862	0.00703005	0.0118888	5.5782e-06	-0.000528361	-5.43232e-06
F	9	Sample X129	3101	3109	3144	3175	3151	3073	3048	3072	3145	3150						IRSp53-SGS	5	0.0279382	0.0291361	0.034392	0.0390675	0.0354461	0.0237553	0.0200336	0.0236062	0.0345425	0.0352954	-9.42478e-07	0.0308868	-1.28427e-06
G	9	Sample X153	2912	2953	2948	2928	2887	2912	2948	2999	3041	3077						4ebp1-70-PDZ	5	0	0.00600209	0.00526841	0.00233846	-0.00364411	0	0.00526841	0.0127745	0.0189938	0.0243519	1.81855e-05	-0.00377597	9.97273e-06
H	9	Sample X177	2809	2849	2871	2878	2904	2957	3041	3089	3139	3181						4ebp1-70-PDZ	5	-0.014938	-0.00916052	-0.00597012	-0.00495309	-0.0011674	0.00658938	0.0189938	0.0261436	0.0336396	0.0399747	5.22213e-05	-0.0224176	4.92173e-05
I	9	Sample X201	2608	2656	2654	2642	2678	2706	2765	2806	2851	2904						4ebp1-70-PDZ	5	-0.0435229	-0.0367635	-0.037046	-0.0387393	-0.0336516	-0.0296782	-0.0212587	-0.0153701	-0.00887086	-0.0011674	3.74365e-05	-0.0490687	3.10907e-05
J	9	Sample X225	11967	11997	12039	12030	12027	12023	11997	12023	12146	12334						-	5	3.22192	3.24806	3.28508	3.2771	3.27445	3.27091	3.24806	3.27091	3.38168	3.55985	0.000192687	3.18819	0.000189024
K	9	Sample X249	10818	10895	10938	10989	10971	10983	11017	11053	11129	11112						-	5	2.37923	2.42749	2.45488	2.48779	2.47612	2.4839	2.50606	2.52975	2.58055	2.56909	0.000162475	2.392	0.00015958
L	9	Sample X273	15214	15355	15507	15557	15618	15810	16217	16601	16598	16458						-	5	9.03113	9.5768	10.2275	10.4574	10.7498	11.7646	14.544	18.4108	18.3737	16.7791	0.00936872	7.37023	0.00935801
A	10	Sample X10	4661	4570	4446	4295	4330	4370	4400	4419	4433	4455						4ebp1-70-SGS	5	0.288179	0.271371	0.248823	0.221906	0.228093	0.235202	0.240561	0.243967	0.246482	0.250446	-2.39914e-05	0.261898	-2.76305e-05
B	10	Sample X34	2938	2894	2921	2895	2846	2818	2858	2879	2909	2924						4ebp1-70-SGS	5	0.00380248	-0.00262495	0.00131478	-0.00247928	-0.00959486	-0.0136406	-0.00785646	-0.00480772	-0.000437919	0.00175339	-2.72335e-06	-0.00182311	-1.84625e-05
C	10	Sample X58	2865	2905	2958	2959	2963	2960	2979	3012	3028	3050						4ebp1-70-SGS	5	-0.00684113	-0.00102155	0.00673625	0.00688314	0.00747089	0.00703005	0.00982497	0.0146959	0.0170651	0.0203309	2.11787e-05	-0.00448975	2.36433e-05
D	10	Sample X82	2689	2670	2687	2693	2695	2675	2695	2730	2750	2786						L5A-PDZ	5	-0.0320923	-0.0347842	-0.032376	-0.0315248	-0.0312409	-0.0340764	-0.0312409	-0.026261	-0.0234053	-0.0182465	1.17604e-05	-0.036581	9.12607e-06
E	10	Sample X106	3068	3082	3087	3038	2949	2945	2996	3025	3063	3084						L5A-PDZ	5	0.02301	0.0250981	0.0258448	0.0185484	0.00541511	0.00482843	0.0123316	0.0166205	0.0222652	0.0253967	-3.21761e-06	0.0198664	-6.78224e-06
F	10	Sample X130	2823	2830	2858	2864	2851	2808	2806	2842	2873	2899						L5A-PDZ	5	-0.0129193	-0.0119085	-0.00785646	-0.00698624	-0.00887086	-0.015082	-0.0153701	-0.0101737	-0.00567964	-0.00189641	5.04338e-06	-0.0127003	4.92812e-06
G	10	Sample X154	2839	2845	2839	2830	2815	2851	2848	2851	2872	2898						L5A-SGS	5	-0.0106077	-0.00973961	-0.0106077	-0.0119085	-0.0140733	-0.00887086	-0.00930532	-0.00887086	-0.00582489	-0.00204216	6.37318e-06	-0.013009	4.85534e-05
H	10	Sample X178	2682	2716	2748	2763	2742	2735	2765	2789	2833	2853						L5A-SGS	5	-0.0330848	-0.0282557	-0.0236912	-0.0215452	-0.0245485	-0.0255478	-0.0212587	-0.0178155	-0.0114751	-0.00858112	1.85473e-05	-0.0327087	1.65378e-06
I	10	Sample X202	2844	2789	2758	2684	2638	2682	2742	2766	2792	2811						L5A-SGS	5	-0.00988434	-0.0178155	-0.022261	-0.0328013	-0.0393031	-0.0330848	-0.0245485	-0.0211155	-0.0173843	-0.0146498	-1.59933e-07	-0.0231889	-6.68554e-06
J	10	Sample X226	6929	6882	6862	6805	6798	6784	6793	6765	6803	6822						PO4-std	5	0.79426	0.781727	0.776425	0.761416	0.759583	0.755923	0.758275	0.750972	0.760892	0.765876	-2.73559e-05	0.782948	-3.04509e-05
K	10	Sample X250	7090	7107	7113	7055	6976	6972	6954	6982	6962	6972						PO4-std	5	0.837992	0.842683	0.844343	0.828378	0.806898	0.805818	0.800969	0.808519	0.803122	0.805818	-4.18648e-05	0.843573	-3.72698e-05
L	10	Sample X274	6695	6666	6602	6594	6581	6564	6566	6558	6594	6613						PO4-std	5	0.732868	0.725433	0.709153	0.707131	0.70385	0.699571	0.700074	0.698064	0.707131	0.711938	-2.00695e-05	0.721563	-2.15205e-05
A	11	Sample X11	3371	3385	3415	3351	3230	3262	3313	3377	3439	3475						IRSp53-PDZ	6	0.0690795	0.0712535	0.0759258	0.065981	0.0474103	0.0522924	0.0601165	0.0700107	0.0796773	0.0853272	8.22772e-06	0.0627708	8.24127e-06
B	11	Sample X35	3122	3100	3136	3131	3113	3134	3151	3187	3186	3206						IRSp53-PDZ	6	0.0310854	0.0277885	0.0331885	0.0324369	0.0297355	0.0328878	0.0354461	0.0408826	0.0407312	0.0437623	1.2896e-05	0.0270569	4.66245e-06
C	11	Sample X59	2994	3002	3030	3059	3036	3000	3035	3080	3122	3166						IRSp53-PDZ	6	0.0120364	0.0132176	0.0173616	0.0216697	0.0182516	0.0129222	0.0181032	0.0247996	0.0310854	0.0377081	1.90546e-05	0.00928277	1.82247e-05
D	11	Sample X83	3308	3271	3247	3215	3159	3064	3082	3118	3153	3188						IRSp53-SGS	6	0.0593471	0.0536693	0.0500013	0.0451289	0.0366519	0.0224141	0.0250981	0.0304853	0.0357474	0.041034	-2.33425e-05	0.0539632	-4.46007e-05
E	11	Sample X107	2937	2916	2922	2924	2914	2927	2931	2969	2978	2984						IRSp53-SGS	6	0.00365599	0.000584158	0.00146097	0.00175339	0.000292041	0.00219216	0.00277747	0.00835309	0.0096777	0.0105616	8.34538e-06	-0.000876368	-2.66514e-06
F	11	Sample X131	3010	3007	3036	3047	3035	3022	3005	3030	3038	3072						IRSp53-SGS	6	0.0144001	0.0139565	0.0182516	0.019885	0.0181032	0.016176	0.0136609	0.0173616	0.0185484	0.0236062	4.54289e-06	0.0146692	4.2011e-06
G	11	Sample X155	2888	2899	2875	2820	2772	2809	2835	2862	2897	2914						4ebp1-70-PDZ	6	-0.00349857	-0.00189641	-0.00538907	-0.0133521	-0.0202555	-0.014938	-0.011186	-0.00727639	-0.00218789	0.000292041	1.74013e-06	-0.00901288	-6.47266e-06
H	11	Sample X179	2880	2909	2912	2914	2894	2868	2862	2900	2941	2966						4ebp1-70-PDZ	6	-0.00466233	-0.000437919	0	0.000292041	-0.00262495	-0.00640571	-0.00727639	-0.00175065	0.00424206	0.00791191	5.59034e-06	-0.0044254	2.58642e-06
I	11	Sample X203	2539	2552	2529	2507	2513	2551	2597	2633	2655	2681						4ebp1-70-PDZ	6	-0.0531671	-0.0513566	-0.0545578	-0.0576112	-0.0567793	-0.051496	-0.045066	-0.0400075	-0.0369048	-0.0332265	2.00151e-05	-0.0600263	1.36693e-05
J	11	Sample X227	11906	11895	11862	11759	11667	11535	11507	11654	11724	11838						-	6	3.16953	3.16019	3.13236	3.04732	2.9736	2.87135	2.85017	2.96335	3.01903	3.1123	-0.000153635	3.1221	-0.000157299
K	11	Sample X251	11538	11099	10730	10600	10565	10584	10585	10582	10608	10672						-	6	2.87362	2.56036	2.32528	2.24785	2.22745	2.2385	2.23908	2.23733	2.25254	2.29041	-0.000396906	2.58739	-0.000399802
L	11	Sample X275	15832	15774	15666	15552	15565	15631	15751	15858	15915	15936						-	6	11.8911	11.5624	10.9894	10.4341	10.495	10.8138	11.4362	12.0435	12.3896	12.5214	0.00101308	10.8498	0.00100237
A	12	Sample X12	3898	3802	3735	3625	3532	3549	3618	3628	3646	3680						4ebp1-70-SGS	6	0.153835	0.137936	0.126964	0.109168	0.0943295	0.0970279	0.108045	0.10965	0.112545	0.118032	-2.96569e-05	0.134547	-3.3296e-05
B	12	Sample X36	2943	2899	2902	2889	2844	2810	2819	2835	2859	2884						4ebp1-70-SGS	6	0.0045352	-0.00189641	-0.00145907	-0.00335301	-0.00988434	-0.0147939	-0.0134964	-0.011186	-0.00771147	-0.0040806	-1.02132e-05	-0.000204658	-2.59524e-05
C	12	Sample X60	3046	2968	2976	2945	2967	2976	2997	3009	3012	3038						4ebp1-70-SGS	6	0.0197364	0.00820601	0.00938321	0.00482843	0.00805895	0.00938321	0.0124792	0.0142522	0.0146959	0.0185484	4.21e-06	0.00943119	6.67466e-06
D	12	Sample X84	2698	2697	2695	2654	2592	2622	2643	2674	2697	2711						L5A-PDZ	6	-0.0308149	-0.0309569	-0.0312409	-0.037046	-0.0457668	-0.0415557	-0.0385983	-0.034218	-0.0309569	-0.0289672	6.55625e-08	-0.0350515	-2.56873e-06
E	12	Sample X108	2953	2941	2915	2872	2827	2827	2875	2906	2932	2957						L5A-PDZ	6	0.00600209	0.00424206	0.00043809	-0.00582489	-0.0123418	-0.0123418	-0.00538907	-0.000875667	0.00292384	0.00658938	-4.6481e-07	-0.00137889	-4.02944e-06
F	12	Sample X132	2682	2747	2764	2790	2799	2809	2857	2889	2918	2931						L5A-PDZ	6	-0.0330848	-0.0238342	-0.021402	-0.0176718	-0.0163777	-0.014938	-0.00800143	-0.00335301	0.000876352	0.00277747	3.11328e-05	-0.0321806	3.10176e-05
G	12	Sample X156	2723	2722	2685	2681	2711	2731	2735	2753	2755	2760						L5A-SGS	6	-0.0272588	-0.0274013	-0.0326596	-0.0332265	-0.0289672	-0.0261184	-0.0255478	-0.0229763	-0.0226903	-0.0219747	7.81993e-06	-0.031574	5.00001e-05
H	12	Sample X180	2491	2517	2546	2563	2523	2518	2528	2562	2589	2624						L5A-SGS	6	-0.0598265	-0.0562244	-0.0521926	-0.0498222	-0.0553914	-0.0560856	-0.0546968	-0.0499618	-0.046187	-0.0412744	1.1771e-05	-0.0592289	-5.12246e-06
I	12	Sample X204	2969	2959	2977	2929	2727	2661	2700	2763	2816	2862						L5A-SGS	6	0.00835309	0.00688314	0.00953044	0.00248478	-0.0266888	-0.036057	-0.0305308	-0.0215452	-0.0139291	-0.00727639	-2.77851e-05	0.00579345	-3.43107e-05
J	12	Sample X228	2603	2607	2612	2625	2620	2629	2633	2641	2657	2663						PO4-std	6	-0.0442246	-0.0436632	-0.0429612	-0.0411337	-0.0418369	-0.0405708	-0.0400075	-0.0388803	-0.0366223	-0.0357743	7.59537e-06	-0.0451247	4.50036e-06
K	12	Sample X252	5156	5157	5164	5125	5071	5075	5061	5056	5047	5052						PO4-std	6	0.383698	0.383898	0.385301	0.377505	0.366786	0.367577	0.364811	0.363824	0.362051	0.363036	-2.44226e-05	0.386502	-1.98276e-05
L	12	Sample X276	5060	4993	4953	4908	4894	4880	4897	4902	4897	4915						PO4-std	6	0.364614	0.351458	0.343667	0.334957	0.33226	0.329568	0.332837	0.333801	0.332837	0.336308	-2.23975e-05	0.352669	-2.38485e-05
A	13	Sample X13	3462	3464	3508	3508	3367	3274	3316	3402	3447	3490						IRSp53-PDZ	7	0.0832838	0.0835979	0.0905306	0.0905306	0.0684592	0.0541286	0.0605784	0.0738988	0.0809304	0.0876895	-8.40239e-06	0.0824042	-8.38884e-06
B	13	Sample X37	3155	3135	3170	3179	3171	3150	3167	3177	3203	3230						IRSp53-PDZ	7	0.0360488	0.0330381	0.0383121	0.0396722	0.0384631	0.0352954	0.0378591	0.0393698	0.0433071	0.0474103	8.62716e-06	0.0337013	3.936e-07
C	13	Sample X61	2905	2884	2887	2903	2852	2782	2807	2834	2872	2903						IRSp53-PDZ	7	-0.00102155	-0.0040806	-0.00364411	-0.00131324	-0.008726	-0.0188209	-0.0152261	-0.0113306	-0.00582489	-0.00131324	-5.30813e-06	-0.00394524	-6.13809e-06
D	13	Sample X85	3777	3790	3817	3771	3708	3651	3656	3689	3722	3724						IRSp53-SGS	7	0.13383	0.135963	0.140406	0.132847	0.122571	0.11335	0.114156	0.119489	0.124847	0.125172	-1.64451e-05	0.13613	-3.77033e-05
E	13	Sample X109	3144	3150	3156	3141	3128	3129	3149	3158	3163	3178						IRSp53-SGS	7	0.034392	0.0352954	0.0361996	0.0339405	0.0319863	0.0321365	0.0351448	0.0365011	0.0372553	0.039521	3.29049e-06	0.0332629	-7.72002e-06
F	13	Sample X133	3319	3339	3333	3313	3261	3202	3222	3244	3277	3297						IRSp53-SGS	7	0.0610405	0.0641258	0.0631993	0.0601165	0.0521395	0.0431554	0.046193	0.0495437	0.0545881	0.0576561	-1.0922e-05	0.061729	-1.12638e-05
G	13	Sample X157	2868	2874	2842	2790	2771	2793	2798	2847	2846	2867						4ebp1-70-PDZ	7	-0.00640571	-0.00553436	-0.0101737	-0.0176718	-0.0203989	-0.0172406	-0.0165215	-0.0094501	-0.00959486	-0.00655087	-9.84982e-07	-0.0113633	-9.19778e-06
H	13	Sample X181	2788	2799	2812	2834	2833	2833	2850	2867	2883	2899						4ebp1-70-PDZ	7	-0.0179592	-0.0163777	-0.0145057	-0.0113306	-0.0114751	-0.0114751	-0.0090157	-0.00655087	-0.00422606	-0.00189641	1.39568e-05	-0.0188553	1.09529e-05
I	13	Sample X205	2575	2595	2613	2623	2587	2597	2623	2635	2646	2670						4ebp1-70-PDZ	7	-0.0481459	-0.0453464	-0.0428207	-0.041415	-0.0464671	-0.045066	-0.041415	-0.0397258	-0.0381751	-0.0347842	9.46109e-06	-0.0480128	3.11533e-06
J	13	Sample X229	10430	10592	10580	10643	10654	10778	10972	11120	11219	11273						-	7	2.15047	2.24317	2.23617	2.27317	2.27969	2.35455	2.47677	2.57447	2.64212	2.67982	0.00050172	2.09001	0.000498056
K	13	Sample X253	11526	11154	10563	9872	9815	9977	10077	10195	10280	10317						-	7	2.86452	2.59749	2.22629	1.85854	1.83089	1.91047	1.96117	2.0226	2.06798	2.08804	-0.000572011	2.48601	-0.000574907
L	13	Sample X277	14846	14869	14769	14553	14594	14680	14775	14860	14985	15036						-	7	7.81883	7.88691	7.59743	7.02534	7.12875	7.35336	7.61433	7.86016	8.2448	8.41027	0.000562298	7.35664	0.000551584
A	14	Sample X14	3390	3347	3334	3247	3206	3233	3243	3271	3271	3297						4ebp1-70-SGS	7	0.0720309	0.0653622	0.0633537	0.0500013	0.0437623	0.0478671	0.0493911	0.0536693	0.0536693	0.0576561	-1.29986e-05	0.0634755	-1.66377e-05
B	14	Sample X38	2919	2914	2947	2937	2872	2875	2887	2908	2927	2940						4ebp1-70-SGS	7	0.00102248	0.000292041	0.00512173	0.00365599	-0.00582489	-0.00538907	-0.00364411	-0.000583854	0.00219216	0.00409551	-4.56273e-07	0.000367563	-1.61954e-05
C	14	Sample X62	3208	3167	3163	3089	3013	3023	3050	3080	3093	3111						4ebp1-70-SGS	7	0.0440659	0.0378591	0.0372553	0.0261436	0.0148438	0.0163242	0.0203309	0.0247996	0.0267415	0.0294358	-1.45318e-05	0.0364991	-1.20672e-05
D	14	Sample X86	2484	2503	2517	2545	2553	2567	2565	2602	2614	2621						L5A-PDZ	7	-0.0607942	-0.0581654	-0.0562244	-0.0523319	-0.0512172	-0.0492637	-0.049543	-0.0443649	-0.0426802	-0.0416963	1.76715e-05	-0.061231	1.50372e-05
E	14	Sample X110	2797	2798	2841	2879	2897	2886	2894	2911	2929	2950						L5A-PDZ	7	-0.0166654	-0.0165215	-0.0103184	-0.00480772	-0.00218789	-0.00378962	-0.00262495	-0.000145992	0.00248478	0.00556182	1.96413e-05	-0.0166863	1.60767e-05
F	14	Sample X134	2719	2732	2774	2810	2833	2829	2807	2820	2819	2850						L5A-PDZ	7	-0.0278285	-0.0259758	-0.0199688	-0.0147939	-0.0114751	-0.012053	-0.0152261	-0.0133521	-0.0134964	-0.0090157	1.45394e-05	-0.0250422	1.44241e-05
G	14	Sample X158	2788	2786	2753	2744	2765	2792	2802	2821	2813	2816						L5A-SGS	7	-0.0179592	-0.0182465	-0.0229763	-0.0242628	-0.0212587	-0.0173843	-0.0159459	-0.0132079	-0.0143616	-0.0139291	7.12791e-06	-0.02223	4.93081e-05
H	14	Sample X182	2830	2792	2778	2743	2624	2480	2474	2530	2579	2632						L5A-SGS	7	-0.0119085	-0.0173843	-0.019395	-0.0244057	-0.0412744	-0.0613468	-0.0621753	-0.0544189	-0.0475866	-0.0401484	-3.90947e-05	-0.0145476	-5.59882e-05
I	14	Sample X206	2861	2863	2899	2895	2862	2866	2874	2896	2911	2914						L5A-SGS	7	-0.00742143	-0.00713132	-0.00189641	-0.00247928	-0.00727639	-0.00669601	-0.00553436	-0.00233359	-0.000145992	0.000292041	5.43171e-06	-0.0073213	-1.0939e-06
J	14	Sample X230	3940	3927	3904	3887	3903	3903	3911	3906	3938	3923						PO4-std	7	0.160858	0.15868	0.154836	0.152003	0.154669	0.154669	0.156005	0.15517	0.160523	0.158011	4.77859e-08	0.156514	-3.04723e-06
K	14	Sample X254	4160	4151	4114	4082	4045	4034	4033	4039	4040	4043						PO4-std	7	0.198328	0.196773	0.190397	0.18491	0.178597	0.176726	0.176557	0.177576	0.177746	0.178257	-2.04477e-05	0.195855	-1.58527e-05
L	14	Sample X278	4167	4119	4068	4063	4056	4074	4061	4047	4067	4069						PO4-std	7	0.19954	0.191257	0.182518	0.181664	0.180471	0.183543	0.181323	0.178937	0.182347	0.182688	-1.16103e-05	0.191395	-1.30613e-05
A	15	Sample X15	3283	3300	3310	3310	3226	3159	3205	3245	3287	3333						IRSp53-PDZ	8	0.0555076	0.058117	0.0596548	0.0596548	0.0468015	0.0366519	0.0436106	0.0496962	0.0561211	0.0631993	-2.66775e-06	0.0545021	-2.65421e-06
B	15	Sample X39	3061	3042	3058	3068	3054	3050	3068	3078	3078	3084						IRSp53-PDZ	8	0.0219674	0.0191423	0.0215208	0.02301	0.0209257	0.0203309	0.02301	0.0245011	0.0245011	0.0253967	4.1759e-06	0.0199251	-4.05766e-06
C	15	Sample X63	3030	2987	3018	3001	2964	2948	2984	2992	2999	3019						IRSp53-PDZ	8	0.0173616	0.0110039	0.0155837	0.0130699	0.00761788	0.00526841	0.0105616	0.0117413	0.0127745	0.0157318	-1.58385e-06	0.0130218	-2.41381e-06
D	15	Sample X87	3056	3009	2995	3000	2963	2946	2974	2975	2978	3004						IRSp53-SGS	8	0.0212232	0.0142522	0.012184	0.0129222	0.00747089	0.00497507	0.00908879	0.00923599	0.0096777	0.0135131	-6.57316e-06	0.0153982	-2.78313e-05
E	15	Sample X111	2864	2867	2864	2873	2851	2853	2848	2867	2859	2883						IRSp53-SGS	8	-0.00698624	-0.00655087	-0.00698624	-0.00567964	-0.00887086	-0.00858112	-0.00930532	-0.00655087	-0.00771147	-0.00422606	4.19541e-07	-0.00739659	-1.0591e-05
F	15	Sample X135	2933	2932	2951	2976	2988	2953	2949	2969	2969	2998						IRSp53-SGS	8	0.00307023	0.00292384	0.00570856	0.00938321	0.0111513	0.00600209	0.00541511	0.00835309	0.00835309	0.0126269	6.06987e-06	0.00365681	5.72808e-06
G	15	Sample X159	2736	2730	2740	2716	2697	2692	2708	2739	2742	2747						4ebp1-70-PDZ	8	-0.0254051	-0.026261	-0.0248341	-0.0282557	-0.0309569	-0.0316667	-0.0293938	-0.0249769	-0.0245485	-0.0238342	1.07515e-06	-0.0276584	-7.13764e-06
H	15	Sample X183	2787	2715	2719	2715	2713	2723	2753	2750	2759	2772						4ebp1-70-PDZ	8	-0.0181028	-0.028398	-0.0278285	-0.028398	-0.0286826	-0.0272588	-0.0229763	-0.0234053	-0.0221179	-0.0202555	3.25208e-06	-0.0266936	2.48164e-07
I	15	Sample X207	2469	2490	2457	2429	2759	2453	2474	2672	2635	2534						4ebp1-70-PDZ	8	-0.0628651	-0.0599648	-0.064519	-0.0683683	-0.0221179	-0.0650697	-0.0621753	-0.0345012	-0.0397258	-0.0538627	1.75965e-05	-0.0638749	1.12507e-05
J	15	Sample X231	9742	9825	9790	9767	9656	9574	9684	9726	9791	9856						-	8	1.79602	1.83572	1.81888	1.80789	1.7557	1.71799	1.76874	1.78846	1.81936	1.85074	3.57145e-06	1.79381	-9.23229e-08
K	15	Sample X255	9581	9591	9583	9214	8521	8407	8633	8719	8860	8971						-	8	1.72118	1.72575	1.72209	1.56054	1.29018	1.24934	1.33124	1.36342	1.41745	1.46115	-0.000354569	1.69698	-0.000357464
L	15	Sample X279	12766	12867	12871	12753	12774	12857	12945	13039	13075	13086						-	8	4.01539	4.1324	4.13713	4.00064	4.0245	4.12062	4.22581	4.34208	4.38772	4.4018	0.000356631	3.96483	0.000345918
A	16	Sample X16	3070	3066	3065	3053	2978	2999	3022	3021	3026	3021						4ebp1-70-SGS	8	0.0233081	0.022712	0.022563	0.020777	0.0096777	0.0127745	0.016176	0.0160279	0.0167687	0.0160279	-7.60132e-06	0.0222421	-1.12404e-05
B	16	Sample X40	2799	2784	2800	2821	2810	2800	2815	2808	2824	2820						4ebp1-70-SGS	8	-0.0163777	-0.0185337	-0.0162338	-0.0132079	-0.0147939	-0.0162338	-0.0140733	-0.015082	-0.0127749	-0.0133521	3.49817e-06	-0.0171652	-1.22409e-05
C	16	Sample X64	3085	3044	2994	2857	2879	2951	2944	2961	2985	2993						4ebp1-70-SGS	8	0.0255461	0.0194393	0.0120364	-0.00800143	-0.00480772	0.00570856	0.00468181	0.00717698	0.010709	0.0118888	-8.0686e-06	0.0132789	-5.60393e-06
D	16	Sample X88	2508	2498	2516	2535	2523	2540	2559	2567	2581	2599						L5A-PDZ	8	-0.0574726	-0.0588578	-0.0563631	-0.0537236	-0.0553914	-0.053028	-0.0503804	-0.0492637	-0.0473068	-0.0447856	1.22692e-05	-0.0600188	9.63489e-06
E	16	Sample X112	2847	2854	2847	2856	2864	2855	2879	2891	2890	2909						L5A-PDZ	8	-0.0094501	-0.00843623	-0.0094501	-0.00814638	-0.00698624	-0.00829131	-0.00480772	-0.00306185	-0.00320744	-0.000437919	7.99815e-06	-0.0110264	4.43352e-06
F	16	Sample X136	2615	2638	2686	2686	2708	2698	2694	2702	2710	2732						L5A-PDZ	8	-0.0425397	-0.0393031	-0.0325178	-0.0325178	-0.0293938	-0.0308149	-0.0313828	-0.0302467	-0.0291094	-0.0259758	1.18066e-05	-0.0394641	1.16913e-05
G	16	Sample X160	2780	2761	2751	2710	2711	2715	2731	2747	2750	2738						L5A-SGS	8	-0.019108	-0.0218316	-0.0232624	-0.0291094	-0.0289672	-0.028398	-0.0261184	-0.0238342	-0.0234053	-0.0251196	-2.95144e-06	-0.0231445	3.92288e-05
H	16	Sample X184	2632	2638	2702	2722	2652	2520	2495	2539	2562	2598						L5A-SGS	8	-0.0401484	-0.0393031	-0.0302467	-0.0274013	-0.0373284	-0.055808	-0.0592731	-0.0531671	-0.0499618	-0.0449258	-1.74902e-05	-0.0332623	-3.43837e-05
I	16	Sample X208	2923	2902	2913	2912	2815	2652	2600	2637	2678	2731						L5A-SGS	8	0.00160717	-0.00145907	0.000146011	0	-0.0140733	-0.0373284	-0.0446454	-0.0394441	-0.0336516	-0.0261184	-4.19202e-05	0.00565541	-4.84458e-05
J	16	Sample X232	3280	3285	3259	3253	3233	3249	3248	3243	3246	3264						PO4-std	8	0.0550478	0.0558143	0.0518338	0.0509172	0.0478671	0.0503065	0.0501539	0.0493911	0.0498488	0.0525982	-3.83175e-06	0.0536769	-6.92676e-06
K	16	Sample X256	3440	3408	3390	3376	3339	3357	3340	3347	3344	3350						PO4-std	8	0.0798338	0.0748339	0.0720309	0.0698555	0.0641258	0.0669097	0.0642803	0.0653622	0.0648984	0.0658263	-1.22678e-05	0.0761563	-7.67271e-06
L	16	Sample X280	3439	3379	3362	3338	3324	3311	3330	3325	3342	3331						PO4-std	8	0.0796773	0.0703213	0.0676842	0.0639713	0.061811	0.0598087	0.0627364	0.0619652	0.0645893	0.0628907	-1.13892e-05	0.072379	-1.28401e-05
A	17	Sample X17	3414	3419	3443	3468	3429	3301	3312	3344	3388	3423						IRSp53-PDZ	9	0.0757698	0.0765502	0.0803037	0.0842265	0.0781127	0.0582707	0.0599626	0.0648984	0.0717199	0.0771749	-9.63766e-06	0.0784815	-9.62411e-06
B	17	Sample X41	3076	3054	3071	3096	3059	3062	3059	3074	3079	3071						IRSp53-PDZ	9	0.0242027	0.0209257	0.0234571	0.0271901	0.0216697	0.0221163	0.0216697	0.0239044	0.0246503	0.0234571	2.76954e-07	0.0231581	-7.9566e-06
C	17	Sample X65	3015	2978	2992	3005	2964	2920	2932	2940	2958	2959						IRSp53-PDZ	9	0.0151397	0.0096777	0.0117413	0.0136609	0.00761788	0.00116862	0.00292384	0.00409551	0.00673625	0.00688314	-8.67619e-06	0.0131702	-9.50615e-06
D	17	Sample X89	2996	2993	2985	2968	2956	2956	2965	2985	2998	3012						IRSp53-SGS	9	0.0123316	0.0118888	0.010709	0.00820601	0.00644253	0.00644253	0.00776488	0.010709	0.0126269	0.0146959	1.26874e-06	0.00942047	-1.99894e-05
E	17	Sample X113	2940	2914	2892	2859	2829	2834	2820	2832	2840	2838						IRSp53-SGS	9	0.00409551	0.000292041	-0.00291623	-0.00771147	-0.012053	-0.0113306	-0.0133521	-0.0116196	-0.0104631	-0.0107523	-1.35673e-05	0.000559296	-2.45778e-05
F	17	Sample X137	2975	2986	2990	3005	3008	2966	2943	2947	2965	2973						IRSp53-SGS	9	0.00923599	0.0108564	0.0114463	0.0136609	0.0141043	0.00791191	0.0045352	0.00512173	0.00776488	0.00894161	-4.51931e-06	0.0120695	-4.86111e-06
G	17	Sample X161	2757	2740	2727	2701	2638	2630	2630	2657	2669	2677						4ebp1-70-PDZ	9	-0.0224041	-0.0248341	-0.0266888	-0.0303888	-0.0393031	-0.04043	-0.04043	-0.0366223	-0.0349257	-0.0337932	-1.28314e-05	-0.0252832	-2.10442e-05
H	17	Sample X185	2755	2732	2739	2737	2721	2702	2684	2670	2681	2690						4ebp1-70-PDZ	9	-0.0226903	-0.0259758	-0.0249769	-0.0252624	-0.0275437	-0.0302467	-0.0328013	-0.0347842	-0.0332265	-0.0319504	-1.05279e-05	-0.0226291	-1.35319e-05
I	17	Sample X209	2473	2477	2468	2438	2417	2407	2425	2452	2462	2481						4ebp1-70-PDZ	9	-0.0623133	-0.0617611	-0.063003	-0.0671325	-0.0700139	-0.0713833	-0.0689171	-0.0652074	-0.0638302	-0.0612087	-1.12563e-06	-0.0648017	-7.47138e-06
J	17	Sample X233	8398	8377	8331	8188	8042	8007	8040	8115	8182	8230						-	9	1.24616	1.23876	1.22264	1.17349	1.12473	1.11324	1.12407	1.14893	1.17146	1.18778	-7.7009e-05	1.22133	-8.06728e-05
K	17	Sample X257	7902	7936	7928	7884	7755	7679	7723	7796	7847	7920						-	9	1.07926	1.09019	1.08761	1.0735	1.03282	1.00931	1.02288	1.04564	1.06173	1.08503	-2.68904e-05	1.07493	-2.97862e-05
L	17	Sample X281	10895	10908	10838	10671	10557	10600	10680	10735	10789	10847						-	9	2.42749	2.43574	2.39167	2.28981	2.22281	2.24785	2.29518	2.32831	2.36131	2.39729	-5.3962e-05	2.37212	-6.46759e-05
A	18	Sample X18	2896	2613	2614	2597	2553	2556	2567	2589	2617	2612						4ebp1-70-SGS	9	-0.00233359	-0.0428207	-0.0426802	-0.045066	-0.0512172	-0.0507989	-0.0492637	-0.046187	-0.0422586	-0.0429612	-1.97688e-05	-0.0296974	-2.34079e-05
B	18	Sample X42	2947	2896	2893	2868	2830	2796	2808	2810	2825	2835						4ebp1-70-SGS	9	0.00512173	-0.00233359	-0.0027706	-0.00640571	-0.0119085	-0.0168092	-0.015082	-0.0147939	-0.0126306	-0.011186	-1.56512e-05	0.000510906	-3.13904e-05
C	18	Sample X66	3157	3099	3073	3071	3085	3126	3168	3180	3195	3225						4ebp1-70-SGS	9	0.0363503	0.0276389	0.0237553	0.0234571	0.0255461	0.0316859	0.0380101	0.0398234	0.0420942	0.0466493	1.63645e-05	0.0236824	1.88292e-05
D	18	Sample X90	2486	2491	2510	2519	2513	2527	2538	2552	2562	2560						L5A-PDZ	9	-0.0605178	-0.0598265	-0.0571953	-0.0559468	-0.0567793	-0.0548358	-0.0533063	-0.0513566	-0.0499618	-0.0502409	1.01315e-05	-0.0610756	7.4972e-06
E	18	Sample X114	2844	2837	2848	2834	2821	2829	2832	2837	2846	2858						L5A-PDZ	9	-0.00988434	-0.0108969	-0.00930532	-0.0113306	-0.0132079	-0.012053	-0.0116196	-0.0108969	-0.00959486	-0.00785646	9.947e-07	-0.0112614	-2.56992e-06
F	18	Sample X138	2603	2614	2630	2633	2653	2643	2657	2649	2656	2677						L5A-PDZ	9	-0.0442246	-0.0426802	-0.04043	-0.0400075	-0.0371872	-0.0385983	-0.0366223	-0.0377518	-0.0367635	-0.0337932	7.95124e-06	-0.0435766	7.83598e-06
G	18	Sample X162	2765	2752	2752	2751	2717	2725	2736	2738	2743	2755						L5A-SGS	9	-0.0212587	-0.0231194	-0.0231194	-0.0232624	-0.0281133	-0.0269738	-0.0254051	-0.0251196	-0.0244057	-0.0226903	-1.87768e-06	-0.0232201	4.03025e-05
H	18	Sample X186	2638	2655	2672	2686	2697	2668	2673	2687	2686	2702						L5A-SGS	9	-0.0393031	-0.0369048	-0.0345012	-0.0325178	-0.0309569	-0.0350672	-0.0343596	-0.032376	-0.0325178	-0.0302467	5.71753e-06	-0.0373056	-1.1176e-05
I	18	Sample X210	2816	2778	2757	2667	2548	2491	2518	2586	2615	2666						L5A-SGS	9	-0.0139291	-0.019395	-0.0224041	-0.0352086	-0.051914	-0.0598265	-0.0560856	-0.0466071	-0.0425397	-0.0353501	-2.7594e-05	-0.0217696	-3.41196e-05
J	18	Sample X234	3059	3045	3056	3047	3029	3035	3025	3030	3047	3022						PO4-std	9	0.0216697	0.0195879	0.0212232	0.019885	0.0172133	0.0181032	0.0166205	0.0173616	0.019885	0.016176	-3.81689e-06	0.0210627	-6.91191e-06
K	18	Sample X258	3092	3070	3053	3055	3042	3004	3012	3012	3023	3018						PO4-std	9	0.026592	0.0233081	0.020777	0.0210745	0.0191423	0.0135131	0.0146959	0.0146959	0.0163242	0.0155837	-1.02592e-05	0.0247262	-5.66414e-06
L	18	Sample X282	3032	3016	2978	2958	2962	2962	2963	2983	2963	2972						PO4-std	9	0.0176582	0.0152877	0.0096777	0.00673625	0.00732393	0.00732393	0.00747089	0.0104143	0.00747089	0.00879446	-6.49517e-06	0.0137129	-7.94617e-06
A	19	Sample X19	3245	3262	3290	3286	3242	3158	3170	3205	3244	3253						IRSp53-PDZ	10	0.0496962	0.0522924	0.0565814	0.0559677	0.0492387	0.0365011	0.0383121	0.0436106	0.0495437	0.0509172	-7.01063e-06	0.0524725	-6.99708e-06
B	19	Sample X43	3093	3078	3103	3105	3056	3047	3055	3082	3081	3105						IRSp53-PDZ	10	0.0267415	0.0245011	0.0282375	0.028537	0.0212232	0.019885	0.0210745	0.0250981	0.0249488	0.028537	-1.01663e-06	0.0254884	-9.25019e-06
C	19	Sample X67	2876	2851	2902	2902	2885	2889	2899	2903	2914	2937						IRSp53-PDZ	10	-0.00524376	-0.00887086	-0.00145907	-0.00145907	-0.00393512	-0.00335301	-0.00189641	-0.00131324	0.000292041	0.00365599	7.28471e-06	-0.00672908	6.45475e-06
D	19	Sample X91	3158	3158	3163	3149	3141	3146	3150	3164	3184	3171						IRSp53-SGS	10	0.0365011	0.0365011	0.0372553	0.0351448	0.0339405	0.034693	0.0352954	0.0374063	0.0404285	0.0384631	2.37924e-06	0.0351354	-1.88789e-05
E	19	Sample X115	2920	2903	2887	2881	2848	2844	2853	2853	2858	2872						IRSp53-SGS	10	0.00116862	-0.00131324	-0.00364411	-0.00451693	-0.00930532	-0.00988434	-0.00858112	-0.00858112	-0.00785646	-0.00582489	-7.38388e-06	-0.00140356	-1.83944e-05
F	19	Sample X139	3003	3011	3027	3011	2990	2951	2938	2951	2982	2993						IRSp53-SGS	10	0.0133653	0.0145479	0.0169169	0.0145479	0.0114463	0.00570856	0.00380248	0.00570856	0.0102669	0.0118888	-6.9329e-06	0.0149797	-7.2747e-06
G	19	Sample X163	2768	2758	2732	2704	2676	2657	2666	2679	2679	2692						4ebp1-70-PDZ	10	-0.0208289	-0.022261	-0.0259758	-0.0299625	-0.0339348	-0.0366223	-0.0353501	-0.0335099	-0.0335099	-0.0316667	-1.17577e-05	-0.0233075	-1.99705e-05
H	19	Sample X187	2741	2737	2740	2742	2741	2728	2717	2735	2752	2750						4ebp1-70-PDZ	10	-0.0246913	-0.0252624	-0.0248341	-0.0245485	-0.0246913	-0.0265462	-0.0281133	-0.0255478	-0.0231194	-0.0234053	5.28138e-07	-0.0253928	-2.47578e-06
I	19	Sample X211	2484	2502	2503	2507	2476	2475	2489	2494	2505	2516						4ebp1-70-PDZ	10	-0.0607942	-0.0583039	-0.0581654	-0.0576112	-0.0618992	-0.0620372	-0.060103	-0.0594114	-0.0578883	-0.0563631	1.46189e-06	-0.0601349	-4.88387e-06
J	19	Sample X235	6372	6405	6414	6366	6332	6382	6441	6463	6492	6517						-	10	0.652095	0.660145	0.662349	0.650636	0.642396	0.65453	0.668979	0.674404	0.681586	0.687806	3.02489e-05	0.645343	2.65851e-05
K	19	Sample X259	6230	6242	6268	6240	6182	6144	6176	6235	6270	6300						-	10	0.617956	0.62081	0.627013	0.620334	0.606598	0.597669	0.605184	0.619145	0.627491	0.634684	5.23223e-06	0.614549	2.33637e-06
L	19	Sample X283	8199	8239	8226	8148	8047	8064	8129	8185	8240	8310						-	10	1.17722	1.19086	1.18642	1.15999	1.12637	1.13199	1.15362	1.17248	1.1912	1.21534	1.32424e-05	1.1626	2.52853e-06
A	20	Sample X20	2834	2889	2896	2871	2846	2872	2897	2906	2922	2923						4ebp1-70-SGS	10	-0.0113306	-0.00335301	-0.00233359	-0.00597012	-0.00959486	-0.00582489	-0.00218789	-0.000875667	0.00146097	0.00160717	8.71433e-06	-0.00906885	5.07523e-06
B	20	Sample X44	2820	2792	2808	2813	2816	2787	2766	2779	2789	2792						4ebp1-70-SGS	10	-0.0133521	-0.0173843	-0.015082	-0.0143616	-0.0139291	-0.0181028	-0.0211155	-0.0192515	-0.0178155	-0.0173843	-4.27225e-06	-0.0142145	-2.00114e-05
C	20	Sample X68	2935	2888	2890	2880	2860	2889	2880	2892	2886	2915						4ebp1-70-SGS	10	0.00336307	-0.00349857	-0.00320744	-0.00466233	-0.00756646	-0.00335301	-0.00466233	-0.00291623	-0.00378962	0.00043809	-1.1461e-06	-0.00229783	1.31857e-06
D	20	Sample X92	2394	2394	2393	2417	2421	2443	2462	2463	2483	2480						L5A-PDZ	10	-0.0731609	-0.0731609	-0.0732975	-0.0700139	-0.0694656	-0.0664454	-0.0638302	-0.0636924	-0.0609324	-0.0613468	1.32082e-05	-0.0754595	1.05739e-05
E	20	Sample X116	2753	2760	2774	2772	2789	2803	2818	2825	2833	2836						L5A-PDZ	10	-0.0229763	-0.0219747	-0.0199688	-0.0202555	-0.0178155	-0.015802	-0.0136406	-0.0126306	-0.0114751	-0.0110415	1.2094e-05	-0.0240144	8.52934e-06
F	20	Sample X140	2645	2658	2668	2655	2679	2663	2667	2669	2694	2716						L5A-PDZ	10	-0.0383162	-0.036481	-0.0350672	-0.0369048	-0.0335099	-0.0357743	-0.0352086	-0.0349257	-0.0313828	-0.0282557	6.5537e-06	-0.0385148	6.43844e-06
G	20	Sample X164	2603	2601	2626	2674	2669	2641	2643	2663	2672	2679						L5A-SGS	10	-0.0442246	-0.0445051	-0.040993	-0.034218	-0.0349257	-0.0388803	-0.0385983	-0.0357743	-0.0345012	-0.0335099	8.86151e-06	-0.0433299	5.10417e-05
H	20	Sample X188	3009	2991	2993	2976	2928	2931	2961	3002	3028	3056						L5A-SGS	10	0.0142522	0.0115938	0.0118888	0.00938321	0.00233846	0.00277747	0.00717698	0.0132176	0.0170651	0.0212232	5.12642e-06	0.00801584	-1.17671e-05
I	20	Sample X212	2729	2752	2758	2751	2741	2726	2747	2755	2766	2783						L5A-SGS	10	-0.0264036	-0.0231194	-0.022261	-0.0232624	-0.0246913	-0.0268313	-0.0238342	-0.0226903	-0.0211155	-0.0186773	3.9173e-06	-0.025639	-2.60831e-06
J	20	Sample X236	2628	2591	2574	2582	2628	2661	2650	2661	2691	2686						PO4-std	10	-0.0407115	-0.0459069	-0.0482857	-0.0471669	-0.0407115	-0.036057	-0.0376107	-0.036057	-0.0318086	-0.0325178	1.34797e-05	-0.0477712	1.03847e-05
K	20	Sample X260	2908	2877	2895	2857	2844	2849	2837	2818	2828	2832						PO4-std	10	-0.000583854	-0.00509843	-0.00247928	-0.00800143	-0.00988434	-0.00916052	-0.0108969	-0.0136406	-0.0121974	-0.0116196	-1.07467e-05	-0.00190824	-6.1516e-06
L	20	Sample X284	2872	2842	2804	2801	2788	2790	2798	2810	2804	2802						PO4-std	10	-0.00582489	-0.0101737	-0.015658	-0.0160899	-0.0179592	-0.0176718	-0.0165215	-0.0147939	-0.015658	-0.0159459	-6.37205e-06	-0.0108065	-7.82304e-06
A	21	Sample X21	3214	3216	3229	3212	3105	3109	3147	3190	3223	3217						IRSp53-PDZ	11	0.044977	0.0452809	0.0472581	0.0446732	0.028537	0.0291361	0.0348436	0.0413368	0.0463451	0.0454329	-2.37091e-06	0.0422046	-2.35737e-06
B	21	Sample X45	2973	2993	3013	3036	3003	3011	3007	3024	3048	3066						IRSp53-PDZ	11	0.00894161	0.0118888	0.0148438	0.0182516	0.0133653	0.0145479	0.0139565	0.0164723	0.0200336	0.022712	8.95895e-06	0.010126	7.2539e-07
C	21	Sample X69	2888	2873	2890	2903	2880	2874	2887	2901	2901	2918						IRSp53-PDZ	11	-0.00349857	-0.00567964	-0.00320744	-0.00131324	-0.00466233	-0.00553436	-0.00364411	-0.00160487	-0.00160487	0.000876352	3.43666e-06	-0.00504931	2.6067e-06
D	21	Sample X93	2919	2907	2902	2892	2878	2881	2890	2914	2902	2935						IRSp53-SGS	11	0.00102248	-0.00072977	-0.00145907	-0.00291623	-0.00495309	-0.00451693	-0.00320744	0.000292041	-0.00145907	0.00336307	1.22618e-06	-0.00219211	-2.0032e-05
E	21	Sample X117	2817	2809	2822	2784	2748	2739	2763	2782	2802	2813						IRSp53-SGS	11	-0.0137849	-0.014938	-0.0130636	-0.0185337	-0.0236912	-0.0249769	-0.0215452	-0.0188209	-0.0159459	-0.0143616	-2.59357e-06	-0.01641	-1.36041e-05
F	21	Sample X141	2927	2939	2957	2972	2964	2927	2910	2914	2914	2923						IRSp53-SGS	11	0.00219216	0.00394899	0.00658938	0.00879446	0.00761788	0.00219216	-0.000291965	0.000292041	0.000292041	0.00160717	-4.79976e-06	0.00620329	-5.14156e-06
G	21	Sample X165	2742	2727	2700	2698	2693	2700	2704	2725	2716	2702						4ebp1-70-PDZ	11	-0.0245485	-0.0266888	-0.0305308	-0.0308149	-0.0315248	-0.0305308	-0.0299625	-0.0269738	-0.0282557	-0.0302467	-2.06645e-06	-0.0277679	-1.02792e-05
H	21	Sample X189	2668	2659	2664	2653	2636	2663	2659	2675	2697	2696						4ebp1-70-PDZ	11	-0.0350672	-0.0363397	-0.0356329	-0.0371872	-0.039585	-0.0357743	-0.0363397	-0.0340764	-0.0309569	-0.0310989	4.42068e-06	-0.0378582	1.41676e-06
I	21	Sample X213	2486	2475	2475	2460	2454	2442	2460	2460	2470	2488						4ebp1-70-PDZ	11	-0.0605178	-0.0620372	-0.0620372	-0.0641058	-0.0649321	-0.0665828	-0.0641058	-0.0641058	-0.0627272	-0.0602413	-7.23975e-07	-0.0627049	-7.06973e-06
J	21	Sample X237	4738	4778	4744	4686	4600	4553	4589	4633	4669	4715						-	11	0.302579	0.310124	0.303708	0.292837	0.276887	0.268255	0.274862	0.282984	0.289668	0.298261	-1.75876e-05	0.300569	-2.12513e-05
K	21	Sample X261	4663	4647	4638	4586	4508	4539	4587	4617	4626	4675						-	11	0.288551	0.285579	0.28391	0.27431	0.260046	0.265696	0.274494	0.280024	0.281688	0.290785	-1.02815e-06	0.279125	-3.92402e-06
L	21	Sample X285	6105	6130	6084	6008	5992	6009	6041	6090	6125	6140						-	11	0.588564	0.594394	0.583685	0.566169	0.562509	0.566398	0.573748	0.585078	0.593226	0.596733	4.99647e-06	0.578053	-5.7174e-06
A	22	Sample X22	2682	2692	2707	2656	2669	2675	2695	2706	2724	2740						4ebp1-70-SGS	11	-0.0330848	-0.0316667	-0.029536	-0.0367635	-0.0349257	-0.0340764	-0.0312409	-0.0296782	-0.0271163	-0.0248341	6.20279e-06	-0.0350139	2.56368e-06
B	22	Sample X46	2724	2706	2734	2735	2741	2746	2776	2769	2784	2780						4ebp1-70-SGS	11	-0.0271163	-0.0296782	-0.0256905	-0.0255478	-0.0246913	-0.0239771	-0.0196819	-0.0206856	-0.0185337	-0.019108	9.76884e-06	-0.0293323	-5.97028e-06
C	22	Sample X70	2852	2795	2767	2778	2782	2801	2805	2812	2820	2816						4ebp1-70-SGS	11	-0.008726	-0.016953	-0.0209722	-0.019395	-0.0188209	-0.0160899	-0.0155141	-0.0145057	-0.0133521	-0.0139291	1.2669e-06	-0.0165859	3.73157e-06
D	22	Sample X94	2432	2406	2443	2473	2474	2451	2469	2471	2479	2497						L5A-PDZ	11	-0.0679566	-0.0715201	-0.0664454	-0.0623133	-0.0621753	-0.065345	-0.0628651	-0.0625892	-0.061485	-0.0589963	8.35071e-06	-0.0691795	5.71642e-06
E	22	Sample X118	2790	2765	2781	2797	2797	2787	2786	2807	2830	2826						L5A-PDZ	11	-0.0176718	-0.0212587	-0.0189644	-0.0166654	-0.0166654	-0.0181028	-0.0182465	-0.0152261	-0.0119085	-0.0124862	6.29458e-06	-0.0204963	2.72995e-06
F	22	Sample X142	50	50	51	51	52	53	53	53	51	51						L5A-PDZ	11	-0.352212	-0.352212	-0.352109	-0.352109	-0.352005	-0.351901	-0.351901	-0.351901	-0.352109	-0.352109	1.72911e-07	-0.35216	5.76498e-08
G	22	Sample X166	3509	3511	3522	3486	3403	3147	3029	3112	3186	3236						L5A-SGS	11	0.0906887	0.0910048	0.0927452	0.0870591	0.0740546	0.0348436	0.0172133	0.0295856	0.0407312	0.0483241	-6.55425e-05	0.0999505	-2.33623e-05
H	22	Sample X190	3979	3995	4007	4002	3983	3978	3982	3997	4013	4036						L5A-SGS	11	0.167416	0.170117	0.172147	0.171301	0.168091	0.167248	0.167922	0.170455	0.173163	0.177066	4.48143e-06	0.167804	-1.24121e-05
I	22	Sample X214	2742	2752	2770	2761	2730	2731	2728	2752	2774	2763						L5A-SGS	11	-0.0245485	-0.0231194	-0.0205423	-0.0218316	-0.026261	-0.0261184	-0.0265462	-0.0231194	-0.0199688	-0.0215452	1.12107e-06	-0.0240327	-5.40453e-06
J	22	Sample X238	2800	2784	2768	2743	2746	2747	2753	2769	2765	2790						PO4-std	11	-0.0162338	-0.0185337	-0.0208289	-0.0244057	-0.0239771	-0.0238342	-0.0229763	-0.0206856	-0.0212587	-0.0176718	-1.35706e-06	-0.0202263	-4.45208e-06
K	22	Sample X262	2853	2847	2833	2813	2805	2805	2805	2807	2798	2796						PO4-std	11	-0.00858112	-0.0094501	-0.0114751	-0.0143616	-0.0155141	-0.0155141	-0.0155141	-0.0152261	-0.0165215	-0.0168092	-7.36187e-06	-0.00947956	-2.76681e-06
L	22	Sample X286	2893	2848	2844	2831	2829	2828	2840	2831	2845	2843						PO4-std	11	-0.0027706	-0.00930532	-0.00988434	-0.0117641	-0.012053	-0.0121974	-0.0104631	-0.0117641	-0.00973961	-0.010029	-3.73768e-06	-0.00775444	-5.18867e-06
A	23	Sample X23	3174	3201	3203	3134	3059	3085	3123	3157	3187	3211						IRSp53-PDZ	12	0.0389164	0.0430038	0.0433071	0.0328878	0.0216697	0.0255461	0.0312355	0.0363503	0.0408826	0.0445214	-1.35487e-08	0.0358402	0
B	23	Sample X47	2995	2995	3008	3020	3000	2989	3006	3047	3047	3061						IRSp53-PDZ	12	0.012184	0.012184	0.0141043	0.0158799	0.0129222	0.0112988	0.0138087	0.019885	0.019885	0.0219674	8.23356e-06	0.0104718	0
C	23	Sample X71	1768	1759	1785	1780	1756	1762	1773	1769	1777	1779						IRSp53-PDZ	12	-0.155445	-0.156583	-0.153293	-0.153927	-0.156962	-0.156204	-0.154813	-0.155319	-0.154307	-0.154053	8.29963e-07	-0.155589	0
D	23	Sample X95	3683	3669	3700	3725	3729	3749	3760	3776	3806	3807						IRSp53-SGS	12	0.118518	0.116254	0.121272	0.125335	0.125986	0.129248	0.131046	0.133666	0.138594	0.138759	2.12582e-05	0.115113	0
E	23	Sample X119	2692	2717	2740	2734	2737	2741	2757	2779	2772	2789						IRSp53-SGS	12	-0.0316667	-0.0281133	-0.0248341	-0.0256905	-0.0252624	-0.0246913	-0.0224041	-0.0192515	-0.0202555	-0.0178155	1.10105e-05	-0.0306048	0
F	23	Sample X143	2915	2932	2937	2930	2891	2882	2907	2909	2935	2942						IRSp53-SGS	12	0.00043809	0.00292384	0.00365599	0.00263111	-0.00306185	-0.00437151	-0.00072977	-0.000437919	0.00336307	0.00438862	3.41795e-07	0.000674891	0
G	23	Sample X167	2634	2634	2651	2664	2657	2661	2676	2689	2696	2688						4ebp1-70-PDZ	12	-0.0398667	-0.0398667	-0.0374696	-0.0356329	-0.0366223	-0.036057	-0.0339348	-0.0320923	-0.0310989	-0.0322341	8.21279e-06	-0.0404152	0
H	23	Sample X191	2724	2708	2688	2703	2697	2706	2721	2718	2727	2732						4ebp1-70-PDZ	12	-0.0271163	-0.0293938	-0.0322341	-0.0301046	-0.0309569	-0.0296782	-0.0275437	-0.0279709	-0.0266888	-0.0259758	3.00392e-06	-0.0305687	0
I	23	Sample X215	2446	2449	2456	2442	2425	2452	2467	2468	2484	2502						4ebp1-70-PDZ	12	-0.0660329	-0.0656202	-0.0646567	-0.0665828	-0.0689171	-0.0652074	-0.0631409	-0.063003	-0.0607942	-0.0583039	6.34576e-06	-0.0680334	0
J	23	Sample X239	2222	2212	2223	2204	2187	2207	2218	2223	2242	2252						-	12	-0.0964091	-0.0977454	-0.0962754	-0.0988132	-0.101079	-0.0984129	-0.0969438	-0.0962754	-0.0937314	-0.0923901	3.66377e-06	-0.0990058	0
K	23	Sample X263	2208	2207	2228	2201	2181	2199	2208	2222	2231	2236						-	12	-0.0982795	-0.0984129	-0.0956065	-0.0992134	-0.101877	-0.0994801	-0.0982795	-0.0964091	-0.095205	-0.0945354	2.89587e-06	-0.0994674	0
L	23	Sample X287	2971	2980	2995	2954	2956	2972	3008	3012	3042	3053						-	12	0.00864732	0.00997227	0.012184	0.00614888	0.00644253	0.00879446	0.0141043	0.0146959	0.0191423	0.020777	1.07139e-05	0.00566256	0
A	24	Sample X24	2623	2647	2638	2618	2604	2619	2632	2644	2651	2667						4ebp1-70-SGS	12	-0.041415	-0.0380341	-0.0393031	-0.0421181	-0.0440843	-0.0419775	-0.0401484	-0.0384572	-0.0374696	-0.0352086	3.63911e-06	-0.0420051	0
B	24	Sample X48	2798	2832	2882	2873	2855	2886	2889	2910	2922	2942						4ebp1-70-SGS	12	-0.0165215	-0.0116196	-0.00437151	-0.00567964	-0.00829131	-0.00378962	-0.00335301	-0.000291965	0.00146097	0.00438862	1.57391e-05	-0.0142503	0
C	24	Sample X72	2953	2921	2888	2888	2890	2888	2901	2902	2916	2908						4ebp1-70-SGS	12	0.00600209	0.00131478	-0.00349857	-0.00349857	-0.00320744	-0.00349857	-0.00160487	-0.00145907	0.000584158	-0.000583854	-2.46467e-06	0.000533809	0
D	24	Sample X96	2542	2553	2512	2441	2466	2492	2519	2535	2543	2550						L5A-PDZ	12	-0.0527496	-0.0512172	-0.056918	-0.0667203	-0.0632788	-0.0596881	-0.0559468	-0.0537236	-0.0526104	-0.0516353	2.6343e-06	-0.0580294	0
E	24	Sample X120	2853	2857	2845	2810	2810	2822	2848	2850	2869	2881						L5A-PDZ	12	-0.00858112	-0.00800143	-0.00973961	-0.0147939	-0.0147939	-0.0130636	-0.00930532	-0.0090157	-0.00626054	-0.00451693	3.56463e-06	-0.011946	0
F	24	Sample X144	49	48	49	48	50	47	52	47	50	50						L5A-PDZ	12	-0.352316	-0.35242	-0.352316	-0.35242	-0.352212	-0.352523	-0.352005	-0.352523	-0.352212	-0.352212	1.15261e-07	-0.352385	0
G	24	Sample X168	3914	3916	3924	3924	3905	3713	3632	3681	3725	3753						L5A-SGS	12	0.156506	0.15684	0.158178	0.158178	0.155003	0.123383	0.110292	0.118194	0.125335	0.129902	-4.21802e-05	0.164489	0
H	24	Sample X192	3737	3779	3787	3748	3753	3773	3813	3819	3850	3866						L5A-SGS	12	0.12729	0.134158	0.135471	0.129085	0.129902	0.133174	0.139747	0.140736	0.145859	0.148512	1.68935e-05	0.126257	0
I	24	Sample X216	2912	2910	2875	2864	2871	2895	2904	2930	2938	2942						L5A-SGS	12	0	-0.000291965	-0.00538907	-0.00698624	-0.00597012	-0.00247928	-0.0011674	0.00263111	0.00380248	0.00438862	6.5256e-06	-0.00506155	0
J	24	Sample X240	2568	2593	2564	2574	2564	2569	2577	2595	2598	2594						PO4-std	12	-0.0491241	-0.0456267	-0.0496826	-0.0482857	-0.0496826	-0.0489844	-0.0478663	-0.0453464	-0.0449258	-0.0454865	3.09501e-06	-0.0493581	0
K	24	Sample X264	2682	2672	2662	2648	2620	2621	2644	2628	2638	2657						PO4-std	12	-0.0330848	-0.0345012	-0.0359157	-0.037893	-0.0418369	-0.0416963	-0.0384572	-0.0407115	-0.0393031	-0.0366223	-4.59506e-06	-0.0352452	0
L	24	Sample X288	2709	2697	2702	2696	2700	2692	2696	2702	2718	2716						PO4-std	12	-0.0292516	-0.0309569	-0.0302467	-0.0310989	-0.0305308	-0.0316667	-0.0310989	-0.0302467	-0.0279709	-0.0282557	1.45099e-06	-0.031003	0
[truncated: 9 more columns]
