# Supplementary material for: PDZ-directed substrate recruitment is the primary determinant of specific 4E-BP1 dephosphorylation by PP1-Neurabin
Source: eLife journal article supplement (doi:10.7554/elife.103403), 2024-11-20
Supplement: fig5-data1 [file Peptides with 1nM PP1-Phactr1.xlsx]

## Sheet: All Cycles
Well Row	Well Col	Content	Raw Data (420-10/455-20)	Temperature		Raw Data (425-10/460-20)	Raw Data (425-10/460-20)	Raw Data (425-10/460-20)	Raw Data (425-10/460-20)	Raw Data (425-10/460-20)	Raw Data (425-10/460-20)	Raw Data (425-10/460-20)	Raw Data (425-10/460-20)	Raw Data (425-10/460-20)	Raw Data (425-10/460-20)			PO4 onc., uM	Std.curve			Well Col
		Time [s]	0	0		0	120	240	360	480	600	720	840	960	1080			12.8	17723.1	16773.5			60	180	300	420	540	660	780	900	1020	1140	Rates	const…	Norm. rate			IRSp53-PDZ			IRSp53-SGS			4ebp1-70-PDZ			4ebp1-70-SGS
A	1	Sample X1				7828	9158	10622	11900	12930	13885	14711	15535	16319	17062			6.4	14953.1	14910.1	IRSp53-PDZ	1	1.05572	1.53716	2.26077	3.16443	4.20764	5.61293	7.43699	10.3552	15.4225	26.3054	0.0191485	-3.75321	0.0191549		200	0.0191549	0.00421127	0.00584927	0.00486007	0.00321106	0.00355395	0.000777528	0.000724689	0.000641523	0.000148892	0.000115221	0.000104311
B	1	Sample X25				5648	7024	8233	9215	10131	10964	11765	12454	13076	13546			3.2	11908.5	12315.3	IRSp53-PDZ	1	0.486063	0.819913	1.18881	1.56096	1.98906	2.4716	3.0522	3.67959	4.389	5.04901	0.00421517	-0.0604807	0.00421127		100	0.00855918	0.00309241	0.00104135	0.0112221	0.00242041	0.00347499	1.00791e-05	0.00079451	0.000325454	3.43503e-05	1.92476e-05	5.18053e-05
C	1	Sample X49				6432	7811	8939	9950	10869	11758	12687	13456	14080	14540			1.6	10098.2	10064.2	IRSp53-PDZ	1	0.666766	1.05035	1.44844	1.89699	2.41108	3.0465	3.92681	4.91265	5.97867	6.99302	0.00583234	-0.266276	0.00584927		50	0.00362284	0.00241423	0.00297901	0.00272331	0.00203748	0.00235205	0.000302302	0.000208457	0.00016385	3.20033e-05	1.18872e-05	2.40894e-05
D	1	Sample X73				5955	7223	8243	9176	10082	10971	11882	12759	13495	14039			0.8	7264.5	7373.7	IRSp53-SGS	1	0.554082	0.87508	1.19223	1.54464	1.96374	2.47612	3.14919	4.00744	4.97111	5.89897	0.00485749	-0.251232	0.00486007		25	0.00414044	0.00203461	0.00259939	0.00228695	0.00177485	0.00188638	0.000179851	9.09243e-05	8.64405e-05	-3.22882e-05	1.99491e-05	-1.0967e-07
E	1	Sample X97				5692	6965	8001	8862	9742	10267	10952	11637	12208	12864			0.4	5625.6	5782.6	IRSp53-SGS	1	0.495608	0.80393	1.11128	1.41823	1.79602	2.06098	2.46387	2.95	3.43921	4.12886	0.00321928	0.135232	0.00321106		12.5	0.00272167	0.00152891	0.00188223	0.00163173	0.00127045	0.00141545	7.98822e-05	1.2777e-05	7.27899e-05	-1.47628e-05	1.88059e-05	1.50488e-05
F	1	Sample X121				5939	7049	8054	8976	9706	10449	11101	11848	12585	13182			0.2	4362.2	4443.5	IRSp53-SGS	1	0.550453	0.826736	1.12868	1.46314	1.77904	2.16114	2.5617	3.12064	3.81609	4.5272	0.00355322	0.0615492	0.00355395		6.25	0.00194183	0.00125235	0.0014003	0.00130728	0.00105977	0.00111798	4.68789e-05	4.5025e-07	2.53637e-05	-1.37695e-05	1.62792e-05	8.92331e-06
G	1	Sample X145				4151	4562	4936	5280	5741	6218	6675	7025	7341	7667			0.1	3646.5	3630.8	4ebp1-70-PDZ	1	0.196773	0.269904	0.34037	0.408766	0.506316	0.615108	0.727736	0.820186	0.908741	1.00563	0.000768504	0.118851	0.000777528		3.125	0.000913011	0.000723044	0.000799079	0.000782967	0.000682984	0.000683813	3.66637e-05	1.03488e-05	9.66684e-06	5.05613e-08	2.72087e-05	2.60689e-06
H	1	Sample X169				4056	4426	4834	5173	5516	5877	6301	6683	7127	7538			0.05	3321.5	3373.6	4ebp1-70-PDZ	1	0.180471	0.245224	0.320763	0.387107	0.457824	0.536481	0.634924	0.729787	0.848221	0.966588	0.000715317	0.101549	0.000724689		1.5625	0.000508235	0.000408068	0.000422468	0.000450818	0.000409581	0.000405895	2.99388e-05	9.86923e-06	-7.30458e-07	1.20977e-05	2.22486e-05	7.0101e-06
I	1	Sample X193				3753	4255	4721	5063	5351	5731	6094	6428	6730	7014			0.025	3090.2	3194.7	4ebp1-70-PDZ	1	0.129902	0.214872	0.299386	0.365206	0.423337	0.504124	0.586007	0.665783	0.741893	0.817192	0.000628785	0.0974992	0.000641523		0.78125	0.000242094	0.000213739	0.000214757	0.000261849	0.000210447	0.00023689	2.55023e-05	4.52882e-06	-3.04895e-07	7.04729e-06	3.49866e-05	3.80849e-07
J	1	Sample X217				5521	6133	6703	7321	7974	8506	8937	9266	9753	10151			0.0125	2987.6	3120.7	PYGM15	1	0.458883	0.595095	0.734926	0.902985	1.10249	1.28475	1.44765	1.5825	1.80124	1.99949	0.00143245	0.331529	0.00143903		0.390625	0.000150981	0.000109591	8.35919e-05	0.000131322	0.000115909	0.000116187	2.3673e-05	8.07939e-06	3.19708e-06	3.88179e-06	2.0774e-05	-1.18162e-06
K	1	Sample X241				5151	5701	6197	6734	7306	7805	8123	8435	8782	9107			0	2948.5	3161.8	PYGM15	1	0.382697	0.497568	0.610138	0.742927	0.898682	1.04847	1.15161	1.25929	1.38736	1.51612	0.00106318	0.311578	0.00106866		0.195312	6.82867e-05	6.08429e-05	7.10155e-05	5.38552e-05	5.00207e-05	6.94284e-05	3.29816e-06	-3.63713e-06	-4.43394e-06	8.05503e-06	3.03498e-05	-1.10967e-05
L	1	Sample X265				5499	6059	6582	7237	7933	8375	8937	9430	9865	10264						PYGM15	1	0.454229	0.577899	0.704102	0.879036	1.08922	1.23805	1.44765	1.65347	1.85513	2.05937	0.00151456	0.287078	0.00151703		0	0	0	0	0	0	0	0	0	0	0	0	0
A	2	Sample X2				3943	4150	4195	4247	4294	4383	4547	4752	4860	4972						4ebp1-70-SGS	1	0.161361	0.1966	0.204397	0.213471	0.221729	0.237521	0.267158	0.305215	0.325732	0.347362	0.000164589	0.149301	0.000148892
B	2	Sample X26				3469	3668	3928	3967	4017	4047	4078	4213	4263	4362						4ebp1-70-SGS	1	0.0843837	0.116093	0.158847	0.165395	0.173841	0.178937	0.184226	0.207531	0.216276	0.233777	0.000118729	0.100693	0.000115221		*1000000
C	2	Sample X50				3804	3914	4071	4140	4079	4090	4276	4427	4503	4615						4ebp1-70-SGS	1	0.138265	0.156506	0.18303	0.194874	0.184397	0.18628	0.21856	0.245404	0.259137	0.279655	0.000119987	0.132619	0.000104311			IRSp53-PDZ			IRSp53-SGS			4ebp1-70-PDZ			4ebp1-70-SGS
D	2	Sample X74				6652	9210	11069	12308	13172	13894	14494	14975	15427	15787						L5A-PDZ	1	0.721856	1.55886	2.54035	3.53454	4.51392	5.62909	6.88046	8.21295	9.87632	11.6347	0.00989667	-0.427694	0.00988729		200	1.14929	0.252676	0.350956	0.291604	0.192663	0.213237	0.0466517	0.0434814	0.0384914	0.00893352	0.00691327	0.00625866
E	2	Sample X98				7154	9497	11146	12598	13738	14570	15324	15918	16435	16816						L5A-PDZ	1	0.855728	1.68323	2.59206	3.82998	5.35803	7.06794	9.45235	12.4083	16.5404	21.4688	0.0180392	-2.69784	0.0180355		100	0.513551	0.185544	0.0624809	0.673326	0.145225	0.208499	0.000604749	0.0476706	0.0195273	0.00206102	0.00115486	0.00310832
F	2	Sample X122				6638	9048	10421	11449	12289	12947	13492	13949	14327	14646						L5A-PDZ	1	0.718288	1.49207	2.14543	2.80686	3.51618	4.22824	4.96657	5.72932	6.49389	7.26329	0.00601154	0.329092	0.00600576		50	0.217371	0.144854	0.178741	0.163399	0.122249	0.141123	0.0181381	0.0125074	0.00983103	0.0019202	0.000713234	0.00144537
G	2	Sample X146				6513	8640	9949	11147	12122	12995	13738	14351	15009	15560						L5A-SGS	1	0.686809	1.33384	1.8965	2.59274	3.35972	4.28714	5.35803	6.54742	8.32202	10.4715	0.00855846	-0.649503	0.00855441		25	0.248427	0.122077	0.155963	0.137217	0.106491	0.113183	0.0107911	0.00545546	0.00518643	-0.00193729	0.00119695	-6.58018e-06
H	2	Sample X170				6900	8927	10272	11485	12540	13669	14722	15396	15961	16408						L5A-SGS	1	0.786514	1.4437	2.06367	2.83365	3.7685	5.24401	7.46701	9.74552	12.6813	16.2678	0.0137262	-2.00557	0.013727		12.5	0.1633	0.0917345	0.112934	0.0979035	0.0762271	0.0849271	0.00479293	0.000766617	0.00436739	-0.000885768	0.00112835	0.000902928
I	2	Sample X194				7815	9993	11642	12987	13887	14394	14665	14888	14980	15130						L5A-SGS	1	1.05161	1.9185	2.95392	4.27725	5.61651	6.64498	7.31341	7.94384	8.22885	8.72937	0.00749287	0.972104	0.00716396		6.25	0.11651	0.075141	0.0840178	0.0784371	0.0635862	0.0670787	0.00281273	2.7015e-05	0.00152182	-0.000826171	0.000976751	0.000535399
J	2	Sample X218				17838	17806	17724	17670	17700	17661	17672	17701	17710	17749						PO4-std	1	77.8235	72.2778	61.045	55.3302	58.3709	54.4765	55.5234	58.4778	59.4572	64.0936	-0.0115891	68.6411	-0.0115724		3.125	0.0547807	0.0433826	0.0479447	0.046978	0.040979	0.0410288	0.00219982	0.000620926	0.000580011	3.03368e-06	0.00163252	0.000156414
K	2	Sample X242				17010	16918	16839	16766	16716	16719	16681	16701	16684	16701						PO4-std	1	25.1254	23.2603	21.8505	20.6795	19.9411	19.9841	19.4519	19.7287	19.4929	19.7287	-0.00450455	23.627	-0.00450341		1.5625	0.0304941	0.0244841	0.0253481	0.0270491	0.0245749	0.0243537	0.00179633	0.000592154	-4.38275e-05	0.000725863	0.00133492	0.000420606
L	2	Sample X266				16610	16827	16889	16876	16835	16856	16821	16874	16880	16854						PO4-std	1	18.5229	21.6498	22.724	22.4909	21.7832	22.1405	21.5508	22.4554	22.5621	22.1061	0.00175902	20.7432	0.0017633		0.78125	0.0145257	0.0128244	0.0128854	0.015711	0.0126268	0.0142134	0.00153014	0.000271729	-1.82937e-05	0.000422838	0.0020992	2.28509e-05
A	3	Sample X3				6233	7727	9157	10287	11224	12157	13336	14303	14906	15526						IRSp53-PDZ	2	0.618669	1.02412	1.53675	2.07176	2.64559	3.3918	4.73857	6.44101	7.99838	10.3139	0.00855275	-1.0536	0.00855918		0.390625	0.00905884	0.00657548	0.00501552	0.0078793	0.00695455	0.00697123	0.00142038	0.000484763	0.000191825	0.000232908	0.00124644	-7.08973e-05
B	3	Sample X27				5247	6533	7995	8879	9276	9757	10677	11471	12252	12550						IRSp53-PDZ	2	0.402048	0.691801	1.10932	1.42486	1.58675	1.80314	2.29339	2.8232	3.48076	3.77901	0.0030963	0.0816479	0.00309241		0.195312	0.0040972	0.00365057	0.00426093	0.00323131	0.00300124	0.0041657	0.00019789	-0.000218228	-0.000266036	0.000483302	0.00182099	-0.000665805
C	3	Sample X51				3843	4799	5614	6178	6642	7092	7480	7894	8207	8451						IRSp53-PDZ	2	0.1447	0.314103	0.478733	0.605655	0.719307	0.838543	0.949338	1.0767	1.17994	1.26499	0.00102442	0.142546	0.00104135		0	0	0	0	0	0	0	0	0	0	0	0	0
D	3	Sample X75				6820	8364	9713	10866	11902	12927	13750	14683	15585	16144						IRSp53-SGS	2	0.765351	1.23419	1.78233	2.4092	3.16613	4.20401	5.37822	7.36139	10.59	13.9671	0.0112195	-1.64592	0.0112221
E	3	Sample X99				5008	6247	7394	8248	8994	9669	10320	10702	10968	11891						IRSp53-SGS	2	0.354392	0.622001	0.924098	1.19394	1.47033	1.76174	2.08967	2.30838	2.47419	3.1568	0.00242863	0.178373	0.00242041
F	3	Sample X123				5851	7157	8292	9109	9844	10688	11385	12005	12559	12999						IRSp53-SGS	2	0.530663	0.856565	1.2091	1.51694	1.84491	2.29997	2.75991	3.25507	3.7885	4.2921	0.00347426	0.150819	0.00347499
G	3	Sample X147				63	63	64	68	71	76	69	68	71	76						4ebp1-70-PDZ	2	-0.350863	-0.350863	-0.350759	-0.350343	-0.350031	-0.349511	-0.350239	-0.350343	-0.350031	-0.349511	1.05518e-06	-0.350883	1.00791e-05
H	3	Sample X171				5787	6082	6301	6449	6601	7095	7601	7974	8355	8712						4ebp1-70-PDZ	2	0.516445	0.583222	0.634924	0.67095	0.7089	0.83937	0.985538	1.10249	1.23103	1.36078	0.000785137	0.392282	0.00079451
I	3	Sample X195				3394	3671	3919	4077	4249	4478	4717	4930	5120	5309						4ebp1-70-PDZ	2	0.0726532	0.116577	0.157342	0.184055	0.213821	0.254603	0.298636	0.339208	0.376509	0.414698	0.000312716	0.0551805	0.000325454
J	3	Sample X219				4247	4579	4999	5470	5889	6096	6328	6790	7096	7432						PYGM15	2	0.213471	0.273023	0.35263	0.44812	0.539174	0.586471	0.64143	0.757491	0.839646	0.935201	0.000662296	0.161288	0.000668878
K	3	Sample X243				3832	4094	4439	4843	5179	5392	5672	5989	6288	6597						PYGM15	2	0.142882	0.186965	0.247562	0.322481	0.388312	0.431824	0.491261	0.561824	0.631802	0.707889	0.000521216	0.0985502	0.000526699
L	3	Sample X267				5187	5310	5517	5451	5418	5769	6105	6411	6667	6916						PYGM15	2	0.38992	0.414903	0.458035	0.444132	0.437234	0.512473	0.588564	0.661614	0.725688	0.790783	0.000369176	0.320829	0.000371638
A	4	Sample X4				4206	4238	4294	4228	4112	4190	4340	4401	4492	4522						4ebp1-70-SGS	2	0.206311	0.211895	0.221729	0.210148	0.190054	0.203529	0.229866	0.24074	0.25714	0.262594	5.00476e-05	0.193372	3.43503e-05
B	4	Sample X28				3435	3723	4000	4002	3918	3821	3675	3695	3861	3931						4ebp1-70-SGS	2	0.0790512	0.125009	0.170963	0.171301	0.157174	0.141066	0.117224	0.120462	0.147682	0.15935	2.27551e-05	0.125275	1.92476e-05
C	4	Sample X52				3443	3470	3428	3475	3547	3639	3702	3738	3798	3854						4ebp1-70-SGS	2	0.0803037	0.0845409	0.0779563	0.0853272	0.0967101	0.111418	0.121597	0.127453	0.137278	0.146522	6.74809e-05	0.066422	5.18053e-05
D	4	Sample X76				5138	7104	8461	9508	10398	11135	12063	12655	13119	13513						L5A-PDZ	2	0.380098	0.841855	1.26857	1.68815	2.13261	2.5846	3.30645	3.89165	4.44438	4.99841	0.00430327	-0.0282846	0.0042939
E	4	Sample X100				5547	7677	9568	10832	11676	12375	12980	13100	14247	14635						L5A-PDZ	2	0.464403	1.0087	1.71526	2.38793	2.98072	3.60021	4.26862	4.41979	6.32009	7.23451	0.00595429	-0.13255	0.00595052
F	4	Sample X124				5374	7322	8949	9985	10719	11273	11792	11916	12570	13377						L5A-PDZ	2	0.428091	0.903272	1.4524	1.91448	2.31862	2.67982	3.07427	3.17805	3.80015	4.79708	0.00363979	0.270751	0.00363401
G	4	Sample X148				4791	6827	8362	9231	10033	10726	11709	12585	12667	13230						L5A-SGS	2	0.312586	0.767191	1.23348	1.56769	1.93871	2.32286	3.00699	3.81609	3.90479	4.59169	0.00394395	-0.0201629	0.0039399
H	4	Sample X172				5241	7274	8544	9357	10243	11073	12135	13057	13660	13967						L5A-SGS	2	0.40083	0.88954	1.29853	1.62156	2.04811	2.54301	3.37159	4.36482	5.22939	5.76269	0.00503596	-0.268571	0.00503676
I	4	Sample X196				6133	7409	8466	9451	10250	10885	11425	11841	12197	12550						L5A-SGS	2	0.595095	0.928472	1.27036	1.66275	2.05186	2.42117	2.78915	3.1148	3.42892	3.77901	0.00298632	0.412367	0.00265741
J	4	Sample X220				15350	14885	15038	14935	14921	14920	14886	14886	14870	14840						PO4-std	2	9.55654	7.93481	8.41687	8.08748	8.04427	8.0412	7.93782	7.93782	7.88989	7.80122	-0.000957561	8.73933	-0.000940894
K	4	Sample X244				15763	15016	14912	14808	14800	14784	14729	14795	14757	14737						PO4-std	2	11.5018	8.34476	8.01669	7.70833	7.68538	7.63979	7.48621	7.67109	7.5638	7.50826	-0.00221456	9.44135	-0.00221342
L	4	Sample X268				16212	15991	15847	15805	15721	15756	15765	15725	15782	15798						PO4-std	2	14.5032	12.878	11.9786	11.7361	11.2751	11.4635	11.5128	11.2964	11.6068	11.6965	-0.00192178	13.1478	-0.00191749
A	5	Sample X5				5640	6481	7430	8340	9130	9990	10989	11740	12500	13116						IRSp53-PDZ	3	0.484334	0.678858	0.934615	1.22578	1.52558	1.91699	2.48779	3.03192	3.72682	4.44048	0.00361642	-0.124532	0.00362284
B	5	Sample X29				4818	5922	6997	7850	8553	9371	10099	10625	11163	11563						IRSp53-PDZ	3	0.317714	0.546608	0.812578	1.06268	1.30181	1.62764	1.97249	2.26253	2.60362	2.8927	0.00241813	0.0891587	0.00241423
C	5	Sample X53				4951	6205	7217	8100	9094	9767	10452	11268	11798	12341						IRSp53-PDZ	3	0.343278	0.612029	0.873388	1.14393	1.5108	1.80789	2.16283	2.67631	3.0792	3.5667	0.00296209	0.000382046	0.00297901
D	5	Sample X77				4839	6048	6863	7819	8761	9747	10473	11007	11503	11898						IRSp53-SGS	3	0.321717	0.575361	0.776689	1.05288	1.37935	1.79839	2.1747	2.49952	2.84716	3.16273	0.00272073	0.0264129	0.00272331
E	5	Sample X101				4553	5617	6262	7315	8450	9125	9658	10074	10464	10850						IRSp53-SGS	3	0.268255	0.479378	0.625579	0.901262	1.26464	1.52352	1.75662	1.95963	2.1696	2.39916	0.00204571	0.107342	0.00203748
F	5	Sample X125				4584	5678	6445	7408	8527	9406	9945	10481	10931	11336						IRSp53-SGS	3	0.273942	0.492563	0.669964	0.92818	1.29235	1.64292	1.89451	2.17923	2.4504	2.72455	0.00235133	0.0440659	0.00235205
G	5	Sample X149				3738	3781	3845	4032	4350	4598	4776	4987	5155	5313						4ebp1-70-PDZ	3	0.127453	0.134486	0.145031	0.176387	0.231642	0.276519	0.309746	0.350286	0.383498	0.415518	0.000293278	0.0790899	0.000302302
H	5	Sample X173				3257	3463	3617	3680	3770	3959	4154	4278	4422	4577						4ebp1-70-PDZ	3	0.0515282	0.0834409	0.107884	0.118032	0.132683	0.164049	0.197291	0.218912	0.244505	0.272656	0.000199085	0.0396472	0.000208457
I	5	Sample X197				3356	3501	3696	3690	3738	3896	4042	4151	4260	4376						4ebp1-70-PDZ	3	0.0667548	0.0894249	0.120624	0.119651	0.127453	0.153502	0.178087	0.196773	0.215749	0.236272	0.000151112	0.0597616	0.00016385
J	5	Sample X221				3605	3880	4175	4381	4364	4597	4909	5155	5368	5580						PYGM15	3	0.105961	0.150838	0.200926	0.237164	0.234133	0.276335	0.33515	0.383498	0.426849	0.471442	0.000326789	0.086156	0.000333371
K	5	Sample X245				3061	3291	3638	3983	3931	4030	4255	4440	4643	4804						PYGM15	3	0.0219674	0.0567349	0.111257	0.168091	0.15935	0.176047	0.214872	0.247742	0.284837	0.315052	0.00025626	0.0218392	0.000261742
L	5	Sample X269				3943	4135	4381	4520	4576	4745	5002	5238	5452	5668						PYGM15	3	0.161361	0.194012	0.237164	0.26223	0.272472	0.303896	0.353217	0.400222	0.444341	0.490393	0.00029461	0.135165	0.000297071
A	6	Sample X6				3836	3723	3355	3272	3555	3832	3847	3867	3859	3875						4ebp1-70-SGS	3	0.143543	0.125009	0.0666	0.0538224	0.0979818	0.142882	0.145362	0.148678	0.147351	0.150007	4.77006e-05	0.0935031	3.20033e-05
B	6	Sample X30				3348	3531	3864	3609	3502	3514	3500	3569	3626	3691						4ebp1-70-SGS	3	0.0655169	0.094171	0.14818	0.106602	0.0895828	0.0914792	0.0892671	0.10021	0.109329	0.119813	1.53947e-05	0.0921783	1.18872e-05
C	6	Sample X54				3337	3407	3529	3503	3471	3488	3550	3595	3627	3665						4ebp1-70-SGS	3	0.0638169	0.074678	0.093854	0.0897407	0.0846981	0.0873743	0.0971868	0.104361	0.109489	0.115608	3.9765e-05	0.0682217	2.40894e-05
D	6	Sample X78				4299	5631	6644	7344	8161	8917	9564	10160	10600	11015						L5A-PDZ	3	0.222611	0.482393	0.719816	0.909607	1.16437	1.43976	1.71344	2.0042	2.24785	2.50475	0.00212152	0.0679636	0.00211215
E	6	Sample X102				4619	6187	7133	7896	8892	9926	10594	11154	11653	12127						L5A-PDZ	3	0.280394	0.607777	0.849886	1.07734	1.42994	1.88509	2.24434	2.59749	2.96256	3.36428	0.00287538	0.00467842	0.00287162
F	6	Sample X126				4208	5423	6265	6961	7761	8539	9296	9813	10300	10667						L5A-PDZ	3	0.206659	0.438277	0.626296	0.802853	1.03469	1.29671	1.59529	1.82993	2.0788	2.28742	0.00196303	0.041873	0.00195725
G	6	Sample X150				3498	4778	5497	6269	6922	7600	8240	8754	9159	9503						L5A-SGS	3	0.0889514	0.310124	0.453807	0.627252	0.792387	0.985236	1.1912	1.37668	1.53758	1.68591	0.00148808	0.0120678	0.00148403
H	6	Sample X174				2804	3850	4572	5093	5540	6027	6448	6814	7113	7376						L5A-SGS	3	-0.015658	0.145859	0.271738	0.371142	0.462915	0.570528	0.670703	0.763775	0.844343	0.918866	0.000846797	-0.00765726	0.000847598
I	6	Sample X198				4664	5416	6100	6720	7379	7875	8405	8871	9258	9698						L5A-SGS	3	0.288737	0.436817	0.587401	0.739309	0.919737	1.07063	1.24864	1.42174	1.5791	1.77529	0.00137503	0.181724	0.00104611
J	6	Sample X222				12420	11947	11886	11834	11800	11795	11833	11817	11870	11883						PO4-std	3	3.64517	3.20463	3.15257	3.10897	3.08084	3.07673	3.10814	3.09487	3.13908	3.15004	-0.000263138	3.33399	-0.000246471
K	6	Sample X246				12476	12556	12415	12319	12280	12237	12222	12214	12203	12231						PO4-std	3	3.70209	3.78534	3.64014	3.54522	3.50752	3.46653	3.45237	3.44484	3.43453	3.46086	-0.000299128	3.72342	-0.000297984
L	6	Sample X270				4087	4130	4109	4085	4070	4076	4077	4062	4063	4066						PO4-std	3	0.185766	0.19315	0.189538	0.185424	0.182859	0.183884	0.184055	0.181494	0.181664	0.182176	-7.87941e-06	0.189729	-3.59489e-06
A	7	Sample X7				5787	6629	7539	8352	9400	10611	11473	12229	12854	13502						IRSp53-PDZ	4	0.516445	0.715999	0.966887	1.22998	1.64029	2.2543	2.82469	3.45897	4.1171	4.9817	0.00413402	-0.209774	0.00414044
B	7	Sample X31				4542	5593	6540	7341	7810	8736	9543	9991	10516	10897						IRSp53-PDZ	4	0.266244	0.474225	0.693552	0.908741	1.05004	1.36985	1.70392	1.9175	2.1992	2.42876	0.00203851	0.0780964	0.00203461
C	7	Sample X55				4642	5800	6706	7744	8424	9393	10160	10745	11249	11754						IRSp53-PDZ	4	0.284651	0.519321	0.735699	1.02939	1.25537	1.63723	2.0042	2.33439	2.66299	3.04326	0.00258247	0.00116992	0.00259939
D	7	Sample X79				4465	5567	6560	7542	8156	9060	9801	10331	10867	11258						IRSp53-SGS	4	0.252251	0.468665	0.698566	0.967785	1.16268	1.49694	1.82416	2.09568	2.40982	2.66929	0.00228436	0.0339656	0.00228695
E	7	Sample X103				4440	5438	6259	6785	7685	8531	9135	9618	9981	10374						IRSp53-SGS	4	0.247742	0.44141	0.624863	0.756184	1.01116	1.29381	1.52764	1.73813	1.91248	2.11931	0.00178308	0.0974259	0.00177485
F	7	Sample X127				4684	5609	6043	7008	7910	8696	9183	9779	10210	10638						IRSp53-SGS	4	0.292463	0.477658	0.574209	0.815562	1.08182	1.35476	1.54756	1.81362	2.03054	2.27021	0.00188565	0.0944499	0.00188638
G	7	Sample X151				3666	3658	3643	3755	4011	4169	4281	4381	4500	4602						4ebp1-70-PDZ	4	0.11577	0.114479	0.112062	0.130228	0.172824	0.199886	0.219439	0.237164	0.258592	0.277256	0.000170827	0.0812737	0.000179851
H	7	Sample X175				3306	3392	3467	3458	3445	3535	3661	3719	3801	3892						4ebp1-70-PDZ	4	0.0590394	0.072342	0.0840693	0.0826558	0.080617	0.0948053	0.114963	0.124359	0.137771	0.152835	8.15517e-05	0.0514147	9.09243e-05
I	7	Sample X199				3301	3410	3489	3424	3471	3555	3637	3709	3770	3835						4ebp1-70-PDZ	4	0.0582707	0.0751458	0.0875319	0.0773312	0.0846981	0.0979818	0.111096	0.122733	0.132683	0.143377	7.37023e-05	0.0548636	8.64405e-05
J	7	Sample X223				3333	3509	3761	3642	3549	3748	3885	4015	4116	4241						PYGM15	4	0.0631993	0.0906887	0.13121	0.111901	0.0970279	0.129085	0.15167	0.173502	0.190741	0.21242	0.000121524	0.0622298	0.000128106
K	7	Sample X247				3017	3170	3506	3461	3221	3391	3481	3605	3704	3809						PYGM15	4	0.0154357	0.0383121	0.0902146	0.0831268	0.0460409	0.0721865	0.0862716	0.105961	0.121921	0.139088	9.15378e-05	0.0249332	9.70202e-05
L	7	Sample X271				4033	4125	4203	4177	4149	4272	4439	4553	4694	4808						PYGM15	4	0.176557	0.192289	0.205789	0.201272	0.196427	0.217857	0.247562	0.268255	0.294331	0.315812	0.000123243	0.157669	0.000125705
A	8	Sample X8				4058	4050	3747	3426	3584	3806	3821	3822	3813	3834						4ebp1-70-SGS	4	0.180812	0.179448	0.128922	0.0776437	0.102603	0.138594	0.141066	0.141231	0.139747	0.143212	-1.65909e-05	0.147282	-3.22882e-05
B	8	Sample X32				3266	3364	3678	3479	3402	3451	3488	3515	3550	3536						4ebp1-70-SGS	4	0.0529041	0.0679941	0.117709	0.0859567	0.0738988	0.0815575	0.0873743	0.0916374	0.0971868	0.0949639	2.34566e-05	0.0710443	1.99491e-05
C	8	Sample X56				3432	3438	3517	3400	3376	3416	3472	3506	3523	3561						4ebp1-70-SGS	4	0.0785818	0.0795207	0.0919538	0.0735873	0.0698555	0.0760819	0.0848554	0.0902146	0.0929035	0.0989364	1.55659e-05	0.0743095	-1.0967e-07
D	8	Sample X80				3795	4539	5333	5622	6248	6830	7340	7773	8209	8595						L5A-PDZ	4	0.136785	0.265696	0.419628	0.480454	0.622239	0.76798	0.908453	1.03843	1.18062	1.3172	0.00108848	0.0606581	0.00107911
E	8	Sample X104				4139	4915	5476	6030	6751	7442	8137	8498	9029	9384						L5A-PDZ	4	0.194701	0.336308	0.449381	0.571217	0.747333	0.938136	1.1563	1.28186	1.48439	1.6333	0.0013683	0.0583104	0.00136454
F	8	Sample X128				3721	4514	4995	5455	6119	6788	7388	7836	8241	8626						L5A-PDZ	4	0.124684	0.261137	0.351849	0.44497	0.591826	0.756968	0.922352	1.05824	1.19154	1.32864	0.00113524	0.0220777	0.00112946
G	8	Sample X152				3962	4718	5404	5803	6538	7182	7765	8259	8667	9079						L5A-SGS	4	0.164553	0.298823	0.434318	0.519986	0.693051	0.863552	1.03594	1.19772	1.34389	1.50467	0.00125818	0.0507442	0.00125413
H	8	Sample X176				4029	4420	5033	5533	6061	6555	6958	7352	7740	8083						L5A-SGS	4	0.175877	0.244146	0.359296	0.461428	0.578361	0.697311	0.802045	0.911916	1.02815	1.13828	0.000911796	0.0926035	0.000912597
I	8	Sample X200				4204	4671	5181	5668	6172	6627	7062	7448	7815	8135						L5A-SGS	4	0.205963	0.29004	0.388714	0.490393	0.604243	0.715491	0.830296	0.939899	1.05161	1.15563	0.000897216	0.128898	0.000568304
J	8	Sample X224				10020	10073	10110	10115	10085	10097	10074	10105	10155	10148						PO4-std	4	1.93212	1.95912	1.97817	1.98076	1.96528	1.97146	1.95963	1.97559	2.00158	1.99792	4.13782e-05	1.94733	5.8045e-05
K	8	Sample X248				10068	10118	10196	10091	10062	10033	9997	10016	10041	10020						PO4-std	4	1.95656	1.98231	2.02313	1.96836	1.95349	1.93871	1.92051	1.9301	1.94278	1.93212	-5.65741e-05	1.98875	-5.54309e-05
L	8	Sample X272				6599	6599	6558	6566	6544	6560	6557	6512	6460	6426						PO4-std	4	0.708394	0.708394	0.698064	0.700074	0.694553	0.698566	0.697813	0.68656	0.673663	0.665292	-3.49156e-05	0.714087	-3.06311e-05
A	9	Sample X9				5303	6001	6838	7571	8378	9403	10133	10841	11500	12088						IRSp53-PDZ	5	0.413469	0.564567	0.770087	0.976487	1.23911	1.6416	1.9901	2.39354	2.8449	3.3289	0.00271524	-0.0128699	0.00272167
B	9	Sample X33				4092	4919	5591	6136	7035	7773	8390	8875	9311	9767						IRSp53-PDZ	5	0.186622	0.337081	0.473796	0.595797	0.822912	1.03843	1.24334	1.4233	1.60171	1.80789	0.0015328	0.0334058	0.00152891
C	9	Sample X57				4562	5699	6450	7205	8004	8712	9257	9758	10230	10654						IRSp53-PDZ	5	0.269904	0.497132	0.671196	0.870009	1.11226	1.36078	1.57868	1.80361	2.04117	2.27969	0.0018653	0.129263	0.00188223
D	9	Sample X81				4102	5060	5779	6466	7213	8083	8635	9131	9537	10001						IRSp53-SGS	5	0.188337	0.364614	0.514678	0.675146	0.872261	1.13828	1.33198	1.52599	1.70121	1.92253	0.00162914	0.0460182	0.00163173
E	9	Sample X105				4090	4932	5582	6285	6742	7501	8041	8363	8840	9203						IRSp53-SGS	5	0.18628	0.339595	0.47187	0.631083	0.744999	0.955562	1.1244	1.23384	1.40969	1.55592	0.00127868	0.0981179	0.00127045
F	9	Sample X129				4202	5037	5616	6249	7006	7706	8190	8724	9166	9537						IRSp53-SGS	5	0.205615	0.360082	0.479163	0.622477	0.815019	1.01762	1.17417	1.36531	1.54048	1.70121	0.00141472	0.0792801	0.00141545
G	9	Sample X153				3428	3401	3327	3370	3515	3591	3658	3716	3753	3811						4ebp1-70-PDZ	5	0.0779563	0.0737431	0.0622736	0.0689244	0.0916374	0.103721	0.114479	0.123871	0.129902	0.139417	7.08582e-05	0.0560775	7.98822e-05
H	9	Sample X177				3345	3304	3313	3238	3118	3131	3211	3285	3343	3386						4ebp1-70-PDZ	5	0.065053	0.0587319	0.0601165	0.0486289	0.0304853	0.0324369	0.0445214	0.0558143	0.0647439	0.071409	3.40432e-06	0.0511515	1.2777e-05
I	9	Sample X201				2920	2879	2957	3038	3092	3143	3188	3224	3264	3300						4ebp1-70-PDZ	5	0.00116862	-0.00480772	0.00658938	0.0185484	0.026592	0.0342415	0.041034	0.0464972	0.0525982	0.058117	6.00517e-05	-0.00797314	7.27899e-05
J	9	Sample X225				2970	3056	3086	3065	3153	3204	3243	3319	3379	3447						PYGM15	5	0.0085002	0.0212232	0.0256954	0.022563	0.0357474	0.0434588	0.0493911	0.0610405	0.0703213	0.0809304	6.36606e-05	0.0036908	7.02426e-05
K	9	Sample X249				2720	2866	2937	2782	2850	2920	2975	3025	3093	3130						PYGM15	5	-0.0276861	-0.00669601	0.00365599	-0.0188209	-0.0090157	0.00116862	0.00923599	0.0166205	0.0267415	0.0322867	4.7121e-05	-0.0255235	5.26034e-05
L	9	Sample X273				3786	3964	4139	3921	3961	3980	4045	4129	4196	4256						PYGM15	5	0.135306	0.16489	0.194701	0.157676	0.164385	0.167585	0.178597	0.192978	0.204571	0.215048	5.31711e-05	0.145671	5.56329e-05
A	10	Sample X10				3515	3552	3324	3129	3269	3451	3443	3423	3430	3447						4ebp1-70-SGS	5	0.0916374	0.0975048	0.061811	0.0321365	0.0533632	0.0815575	0.0803037	0.0771749	0.078269	0.0809304	9.34506e-07	0.0729081	-1.47628e-05
B	10	Sample X34				3099	3324	3476	3315	3367	3307	3386	3389	3400	3393						4ebp1-70-SGS	5	0.0276389	0.061811	0.0854846	0.0604244	0.0684592	0.0591932	0.071409	0.0718754	0.0735873	0.0724976	2.23134e-05	0.05185	1.88059e-05
C	10	Sample X58				3161	3177	3217	3203	3227	3283	3315	3330	3354	3359						4ebp1-70-SGS	5	0.0369536	0.0393698	0.0454329	0.0433071	0.0469537	0.0555076	0.0604244	0.0627364	0.0664452	0.0672194	3.07244e-05	0.0340004	1.50488e-05
D	10	Sample X82				3379	3755	4019	4383	4771	5102	5435	5745	6030	6301						L5A-PDZ	5	0.0703213	0.130228	0.17418	0.237521	0.3088	0.372929	0.440783	0.507194	0.571217	0.634924	0.000530673	0.026406	0.0005213
E	10	Sample X106				3862	4193	4365	4681	5204	5516	5855	6169	6443	6729						L5A-PDZ	5	0.147848	0.20405	0.234311	0.291904	0.393345	0.457824	0.531556	0.603537	0.669472	0.741634	0.000567252	0.0871969	0.000563489
F	10	Sample X130				3557	3936	4201	4542	4881	5418	5713	6046	6328	6594						L5A-PDZ	5	0.0982999	0.160188	0.205441	0.266244	0.32976	0.437234	0.500187	0.5749	0.64143	0.707131	0.000581049	0.0434519	0.000575268
G	10	Sample X154				3241	3818	4052	4378	4680	5245	5542	5830	6151	6408						L5A-SGS	5	0.0490862	0.140571	0.179789	0.236629	0.291717	0.401642	0.46334	0.525981	0.59931	0.66088	0.000567593	0.014339	0.000563543
H	10	Sample X178				3570	4279	4684	4685	4937	5281	5611	5912	6213	6477						L5A-SGS	5	0.10037	0.219087	0.292463	0.29265	0.340563	0.40897	0.478088	0.544351	0.613923	0.677867	0.000497247	0.0984854	0.000498047
I	10	Sample X202				3692	3902	4174	4415	4672	4920	5159	5410	5620	5835						L5A-SGS	5	0.119975	0.154502	0.200752	0.243249	0.290227	0.337274	0.384299	0.435567	0.480023	0.527095	0.000383181	0.0873875	5.42687e-05
J	10	Sample X226				7454	7324	7267	7253	7222	7212	7228	7231	7214	7240						PO4-std	5	0.941665	0.903847	0.887547	0.88357	0.874798	0.871979	0.876492	0.87734	0.872542	0.879885	-4.29415e-05	0.912731	-2.62746e-05
K	10	Sample X250				7468	7453	7423	7376	7343	7338	7330	7323	7337	7346						PO4-std	5	0.945792	0.941371	0.932564	0.918866	0.909318	0.907877	0.905573	0.90356	0.907589	0.910184	-3.75399e-05	0.940793	-3.63967e-05
L	10	Sample X274				7631	7592	7488	7448	7439	7435	7449	7461	7463	7454						PO4-std	5	0.994641	0.982818	0.951706	0.939899	0.937255	0.936081	0.940194	0.943727	0.944317	0.941665	-3.97212e-05	0.975063	-3.54367e-05
A	11	Sample X11				5187	5651	6308	6898	7467	8409	9102	9782	10404	10905						IRSp53-PDZ	6	0.38992	0.486711	0.636608	0.785982	0.945497	1.25005	1.51407	1.81505	2.13594	2.43383	0.0019354	0.0781283	0.00194183
B	11	Sample X35				4121	4695	5032	5602	6519	7218	7739	8199	8651	9030						IRSp53-PDZ	6	0.191601	0.294517	0.359099	0.476155	0.688305	0.87367	1.02784	1.17722	1.33793	1.4848	0.00125625	0.037366	0.00125235
C	11	Sample X59				4423	5434	5967	6593	7318	7865	8388	8842	9222	9629						IRSp53-PDZ	6	0.244685	0.440574	0.556809	0.706878	0.902123	1.06744	1.24263	1.41047	1.5639	1.7432	0.00138337	0.157847	0.0014003
D	11	Sample X83				4417	5257	5360	5655	6663	7541	7990	8496	8920	9303						IRSp53-SGS	6	0.243608	0.40408	0.425195	0.487577	0.724665	0.967486	1.10769	1.28114	1.44094	1.59828	0.0013047	0.085248	0.00130728
E	11	Sample X107				4105	4873	5200	5773	6298	7073	7426	7882	8273	8598						IRSp53-SGS	6	0.188852	0.328224	0.392539	0.513354	0.634203	0.833315	0.933443	1.07286	1.20254	1.31831	0.00106799	0.100967	0.00105977
F	11	Sample X131				4351	4744	5054	5708	6640	7129	7586	8018	8390	8724						IRSp53-SGS	6	0.23182	0.303708	0.36343	0.499095	0.718797	0.848776	0.981006	1.11684	1.24334	1.36531	0.00111725	0.0968612	0.00111798
G	11	Sample X155				3495	3425	3285	3312	3455	3500	3545	3578	3606	3637						4ebp1-70-PDZ	6	0.088478	0.0774874	0.0558143	0.0599626	0.082185	0.0892671	0.0963924	0.101645	0.106121	0.111096	3.78549e-05	0.064132	4.68789e-05
H	11	Sample X179				3342	3325	3302	3142	3006	3124	3172	3219	3259	3289						4ebp1-70-PDZ	6	0.0645893	0.0619652	0.0584244	0.034091	0.0138087	0.0313856	0.0386142	0.0457369	0.0518338	0.0564279	-8.92238e-06	0.0510411	4.5025e-07
I	11	Sample X203				3147	3150	3075	3046	3093	3125	3157	3177	3189	3204						4ebp1-70-PDZ	6	0.0348436	0.0352954	0.0240536	0.0197364	0.0267415	0.0315358	0.0363503	0.0393698	0.0411854	0.0434588	1.26255e-05	0.0256818	2.53637e-05
J	11	Sample X227				2966	3029	3045	3014	3023	3057	3081	3128	3174	3191						PYGM15	6	0.00791191	0.0172133	0.0195879	0.0149917	0.0163242	0.021372	0.0249488	0.0319863	0.0389164	0.0414882	2.78293e-05	0.00677652	3.44113e-05
K	11	Sample X251				2745	2848	2864	2707	2741	2790	2837	2860	2898	2922						PYGM15	6	-0.02412	-0.00930532	-0.00698624	-0.029536	-0.0246913	-0.0176718	-0.0108969	-0.00756646	-0.00204216	0.00146097	1.72276e-05	-0.0234721	2.271e-05
L	11	Sample X275				3471	3383	3566	3723	3671	3644	3662	3666	3696	3736						PYGM15	6	0.0846981	0.0709427	0.0997326	0.125009	0.116577	0.112223	0.115124	0.11577	0.120624	0.127127	3.91818e-05	0.0852736	4.16436e-05
A	12	Sample X12				3733	3770	3546	3333	3406	3557	3629	3660	3663	3668						4ebp1-70-SGS	6	0.126638	0.132683	0.0965513	0.0631993	0.0745221	0.0982999	0.10981	0.114801	0.115285	0.116093	1.92778e-06	0.103632	-1.37695e-05
B	12	Sample X36				3156	3359	3579	3414	3531	3388	3464	3450	3452	3439						4ebp1-70-SGS	6	0.0361996	0.0672194	0.101805	0.0757698	0.094171	0.0717199	0.0835979	0.0814007	0.0817144	0.0796773	1.97867e-05	0.0654555	1.62792e-05
C	12	Sample X60				3286	3272	3338	3307	3324	3327	3383	3409	3433	3445						4ebp1-70-SGS	6	0.0559677	0.0538224	0.0639713	0.0591932	0.061811	0.0622736	0.0709427	0.0749898	0.0787383	0.080617	2.45989e-05	0.0514734	8.92331e-06
D	12	Sample X84				3242	3378	3491	3668	3926	4166	4369	4550	4725	4904						L5A-PDZ	6	0.0492387	0.070166	0.0878472	0.116093	0.158513	0.199367	0.235024	0.267706	0.300136	0.334186	0.000276326	0.0160318	0.000266954
E	12	Sample X108				3560	3699	3891	4108	4356	4545	4729	4932	5121	5295						L5A-PDZ	6	0.0987773	0.12111	0.152669	0.189367	0.232709	0.266792	0.300887	0.339595	0.376708	0.411831	0.000298482	0.0699553	0.000294719
F	12	Sample X132				3314	3523	3433	3639	3939	4156	4339	4511	4709	4849						L5A-PDZ	6	0.0602704	0.0929035	0.0787383	0.111418	0.16069	0.197637	0.229689	0.260592	0.297137	0.323627	0.00025762	0.0266984	0.000251839
G	12	Sample X156				3385	3815	3563	3658	4010	4225	4389	4583	4749	4919						L5A-SGS	6	0.0712535	0.140077	0.0992548	0.114479	0.172655	0.209624	0.238593	0.273758	0.304649	0.337081	0.000243752	0.0498913	0.000239702
H	12	Sample X180				3520	4168	4118	4257	4428	4560	4742	4914	5102	5250						L5A-SGS	6	0.0924285	0.199713	0.191085	0.215223	0.245583	0.269537	0.303331	0.336115	0.372929	0.402658	0.000253434	0.1108	0.000254235
I	12	Sample X204				3608	3682	3784	3886	4006	4116	4233	4349	4462	4562						L5A-SGS	6	0.106441	0.118356	0.134978	0.151836	0.171978	0.190741	0.211021	0.231464	0.251709	0.269904	0.000155726	0.0904071	-0.000173186
J	12	Sample X228				5615	5555	5659	5653	5638	5632	5621	5611	5630	5642						PO4-std	6	0.478948	0.466106	0.488443	0.487144	0.483903	0.482608	0.480239	0.478088	0.482177	0.484766	4.60005e-06	0.478482	2.12669e-05
K	12	Sample X252				5980	5883	5813	5768	5741	5734	5740	5718	5714	5735						PO4-std	6	0.55977	0.537827	0.522203	0.512252	0.506316	0.504781	0.506096	0.501279	0.500405	0.505	-4.44195e-05	0.542245	-4.32763e-05
L	12	Sample X276				5779	5689	5701	5700	5686	5688	5681	5690	5718	5719						PO4-std	6	0.514678	0.494955	0.497568	0.49735	0.494302	0.494737	0.493215	0.495172	0.501279	0.501498	-4.96474e-06	0.501454	-6.80223e-07
A	13	Sample X13				4897	5095	5529	5720	6061	6678	7237	7670	8107	8490						IRSp53-PDZ	7	0.332837	0.371539	0.460579	0.501716	0.578361	0.728505	0.879036	1.00655	1.14626	1.27898	0.000906583	0.184488	0.000913011
B	13	Sample X37				3711	4084	4310	4728	5324	5797	6210	6576	6926	7199						IRSp53-PDZ	7	0.123058	0.185253	0.224553	0.3007	0.417777	0.518657	0.613212	0.70259	0.793457	0.868322	0.00072694	0.0385941	0.000723044
C	13	Sample X61				3986	4729	4894	5279	5914	6336	6742	7075	7379	7669						IRSp53-PDZ	7	0.168597	0.300887	0.33226	0.408562	0.544802	0.643363	0.744999	0.833865	0.919737	1.00625	0.000782155	0.121039	0.000799079
D	13	Sample X85				3998	4557	4436	4841	5710	6125	6555	6916	7258	7552						IRSp53-SGS	7	0.170625	0.268988	0.247022	0.322099	0.499531	0.593226	0.697311	0.790783	0.884989	0.97078	0.000780381	0.0763066	0.000782967
E	13	Sample X109				3617	4245	4394	4740	5427	5823	6199	6533	6798	7098						IRSp53-SGS	7	0.107884	0.21312	0.239487	0.302955	0.439111	0.524424	0.61061	0.691801	0.759583	0.840198	0.000691207	0.0581929	0.000682984
F	13	Sample X133				3892	4434	4563	4874	5517	5960	6303	6625	6914	7214						IRSp53-SGS	7	0.152835	0.246662	0.270087	0.328416	0.458035	0.555217	0.635405	0.714983	0.790249	0.872542	0.000683086	0.0925917	0.000683813
G	13	Sample X157				3296	3252	3098	3157	3298	3318	3344	3355	3376	3389						4ebp1-70-PDZ	7	0.0575025	0.0507645	0.0274893	0.0363503	0.0578098	0.0608864	0.0648984	0.0666	0.0698555	0.0718754	2.76398e-05	0.0398194	3.66637e-05
H	13	Sample X181				3130	3167	3095	2869	2903	2993	3025	3079	3119	3130						4ebp1-70-PDZ	7	0.0322867	0.0378591	0.0270405	-0.00626054	-0.00131324	0.0118888	0.0166205	0.0246503	0.0306353	0.0322867	9.76142e-07	0.0199837	1.03488e-05
I	13	Sample X205				2991	3063	3000	2913	2917	2936	2951	2970	2998	2998						4ebp1-70-PDZ	7	0.0115938	0.0222652	0.0129222	0.000146011	0.000730246	0.00350952	0.00570856	0.0085002	0.0126269	0.0126269	-3.07139e-06	0.0109058	9.66684e-06
J	13	Sample X229				2830	2944	2907	2781	2878	2882	2898	2918	2942	2967						PYGM15	7	-0.0119085	0.00468181	-0.00072977	-0.0189644	-0.00495309	-0.00437151	-0.00204216	0.000876352	0.00438862	0.00805895	1.19714e-05	-0.00967923	1.85534e-05
K	13	Sample X253				2683	2805	2815	2581	2567	2615	2642	2679	2693	2716						PYGM15	7	-0.0329431	-0.0155141	-0.0140733	-0.0473068	-0.0492637	-0.0425397	-0.0387393	-0.0335099	-0.0315248	-0.0282557	-6.80023e-06	-0.0292869	-1.31778e-06
L	13	Sample X277				3454	3420	3417	3488	3431	3449	3439	3441	3462	3466						PYGM15	7	0.0820281	0.0767064	0.076238	0.0873743	0.0784254	0.0812439	0.0796773	0.0799904	0.0832838	0.0839122	3.10549e-06	0.0790247	5.56724e-06
A	14	Sample X14				3494	3581	3504	3295	3370	3507	3556	3572	3568	3584						4ebp1-70-SGS	7	0.0883203	0.102124	0.0898987	0.057349	0.0689244	0.0903726	0.0981408	0.100689	0.100051	0.102603	1.57479e-05	0.0803986	5.05613e-08
B	14	Sample X38				2969	3140	3353	3279	3330	3286	3305	3304	3312	3307						4ebp1-70-SGS	7	0.00835309	0.0337901	0.0662904	0.0548945	0.0627364	0.0559677	0.0588857	0.0587319	0.0599626	0.0591932	3.07162e-05	0.0334508	2.72087e-05
C	14	Sample X62				3378	3374	3410	3344	3454	3457	3449	3466	3478	3488						4ebp1-70-SGS	7	0.070166	0.0695451	0.0751458	0.0648984	0.0820281	0.0824988	0.0812439	0.0839122	0.0857993	0.0873743	1.82825e-05	0.0672917	2.60689e-06
D	14	Sample X86				3108	3196	3236	3337	3470	3567	3674	3790	3871	3963						L5A-PDZ	7	0.0289863	0.0422458	0.0483241	0.0638169	0.0845409	0.0998918	0.117062	0.135963	0.149342	0.164722	0.000130534	0.015169	0.000121161
E	14	Sample X110				3366	3429	3509	3626	3755	3865	3982	4084	4201	4293						L5A-PDZ	7	0.0683041	0.0781127	0.0906887	0.109329	0.130228	0.148346	0.167922	0.185253	0.205441	0.221553	0.000148346	0.05151	0.000144583
F	14	Sample X134				3126	3475	3367	3444	3628	3773	3878	3957	4065	4153						L5A-PDZ	7	0.0316859	0.0853272	0.0684592	0.0804603	0.10965	0.133174	0.150505	0.163713	0.182006	0.197118	0.000145231	0.0330715	0.00013945
G	14	Sample X158				3173	3589	3349	3363	3574	3707	3803	3889	3995	4096						L5A-SGS	7	0.0387653	0.103402	0.0656716	0.0678391	0.101007	0.122408	0.1381	0.152336	0.170117	0.187308	0.000124717	0.0398652	0.000120667
H	14	Sample X182				3519	3899	3896	3688	3708	3869	4009	4131	4228	4318						L5A-SGS	7	0.0922703	0.154002	0.153502	0.119327	0.122571	0.14901	0.172486	0.193322	0.210148	0.225968	0.000100066	0.0992207	0.000100867
I	14	Sample X206				3467	3557	3578	3577	3620	3649	3722	3791	3860	3941						L5A-SGS	7	0.0840693	0.0982999	0.101645	0.101486	0.108365	0.113028	0.124847	0.136128	0.147516	0.161026	6.48626e-05	0.0787235	-0.00026405
J	14	Sample X230				4480	4364	4359	4360	4339	4359	4344	4345	4331	4341						PO4-std	7	0.254965	0.234133	0.233243	0.233421	0.229689	0.233243	0.230576	0.230754	0.22827	0.230044	-1.42806e-05	0.242402	2.38619e-06
K	14	Sample X254				4586	4500	4460	4427	4418	4409	4395	4413	4405	4422						PO4-std	7	0.27431	0.258592	0.251348	0.245404	0.243787	0.242173	0.239666	0.24289	0.241456	0.244505	-2.26925e-05	0.262029	-2.15493e-05
L	14	Sample X278				4701	4691	4717	4677	4670	4672	4652	4668	4666	4662						PO4-std	7	0.295639	0.29377	0.298636	0.291158	0.289854	0.290227	0.286507	0.289482	0.28911	0.288365	-7.95145e-06	0.296046	-3.66694e-06
A	15	Sample X15				4277	4541	4541	4704	5212	5618	5942	6203	6435	6661						IRSp53-PDZ	8	0.218736	0.266061	0.266061	0.296201	0.39496	0.479593	0.551133	0.611556	0.667503	0.724154	0.000501806	0.146512	0.000508235
B	15	Sample X39				3334	3731	3755	4029	4502	4804	5041	5277	5479	5692						IRSp53-PDZ	8	0.0633537	0.126312	0.130228	0.175877	0.258955	0.315052	0.360869	0.408154	0.450013	0.495608	0.000411964	0.0312637	0.000408068
C	15	Sample X63				3663	4175	4308	4488	4915	5167	5404	5593	5800	5964						IRSp53-PDZ	8	0.115285	0.200926	0.2242	0.256415	0.336308	0.385903	0.434318	0.474225	0.519321	0.556127	0.000405544	0.106976	0.000422468
D	15	Sample X87				3460	4130	4129	4355	4816	5076	5381	5622	5843	6055						IRSp53-SGS	8	0.0829697	0.19315	0.192978	0.232531	0.317333	0.367775	0.429541	0.480454	0.528877	0.576976	0.000448232	0.0713192	0.000450818
E	15	Sample X111				3404	3936	3870	4004	4552	4862	5134	5379	5582	5802						IRSp53-SGS	8	0.0742104	0.160188	0.149176	0.171639	0.268072	0.326115	0.3793	0.429127	0.47187	0.519764	0.000417805	0.0442632	0.000409581
F	15	Sample X135				3650	4176	4254	4492	4881	5130	5375	5595	5797	5940						IRSp53-SGS	8	0.113189	0.201099	0.214697	0.25714	0.32976	0.378502	0.428298	0.474654	0.518657	0.550679	0.000405168	0.103567	0.000405895
G	15	Sample X159				3151	3088	2947	2999	3104	3154	3165	3187	3186	3188						4ebp1-70-PDZ	8	0.0354461	0.0259942	0.00512173	0.0127745	0.0283872	0.0358981	0.0375572	0.0408826	0.0407312	0.041034	2.09148e-05	0.0178338	2.99388e-05
H	15	Sample X183				2938	2957	2907	2722	2742	2824	2861	2898	2903	2938						4ebp1-70-PDZ	8	0.00380248	0.00658938	-0.00072977	-0.0274013	-0.0245485	-0.0127749	-0.00742143	-0.00204216	-0.00131324	0.00380248	4.96603e-07	-0.00650166	9.86923e-06
I	15	Sample X207				2958	2927	2858	2812	2822	2811	2818	2831	2834	2841						4ebp1-70-PDZ	8	0.00673625	0.00219216	-0.00785646	-0.0145057	-0.0130636	-0.0146498	-0.0136406	-0.0117641	-0.0113306	-0.0103184	-1.34687e-05	-0.000738863	-7.30458e-07
J	15	Sample X231				2719	2824	2555	2481	2598	2659	2701	2731	2752	2757						PYGM15	8	-0.0278285	-0.0127749	-0.0509383	-0.0612087	-0.0449258	-0.0363397	-0.0303888	-0.0261184	-0.0231194	-0.0224041	1.01795e-05	-0.0397124	1.67615e-05
K	15	Sample X255				2535	2681	2803	2534	2429	2451	2455	2474	2476	2508						PYGM15	8	-0.0537236	-0.0332265	-0.015802	-0.0538627	-0.0683683	-0.065345	-0.0647944	-0.0621753	-0.0618992	-0.0574726	-2.50549e-05	-0.038634	-1.95725e-05
L	15	Sample X279				3214	3219	3323	3280	3099	3130	3137	3172	3177	3196						PYGM15	8	0.044977	0.0457369	0.0616569	0.0550478	0.0276389	0.0322867	0.0333388	0.0386142	0.0393698	0.0422458	-1.23658e-05	0.0495108	-9.90406e-06
A	16	Sample X16				3165	3216	3220	3098	3189	3272	3319	3331	3333	3330						4ebp1-70-SGS	8	0.0375572	0.0452809	0.0458889	0.0274893	0.0411854	0.0538224	0.0610405	0.0628907	0.0631993	0.0627364	2.7795e-05	0.0334321	1.20977e-05
B	16	Sample X40				2868	3017	3142	3074	3120	3130	3141	3139	3136	3136						4ebp1-70-SGS	8	-0.00640571	0.0154357	0.034091	0.0239044	0.0307853	0.0322867	0.0339405	0.0336396	0.0331885	0.0331885	2.57561e-05	0.0109518	2.22486e-05
C	16	Sample X64				3005	3050	3122	3180	3109	3144	3170	3177	3190	3198						4ebp1-70-SGS	8	0.0136609	0.0203309	0.0310854	0.0398234	0.0291361	0.034392	0.0383121	0.0393698	0.0413368	0.0425489	2.26857e-05	0.0193882	7.0101e-06
D	16	Sample X88				2856	2941	3072	2956	3022	3100	3141	3215	3253	3304						L5A-PDZ	8	-0.00814638	0.00424206	0.0236062	0.00644253	0.016176	0.0277885	0.0339405	0.0451289	0.0509172	0.0587319	5.70884e-05	-0.0083703	4.77157e-05
E	16	Sample X112				3062	3313	3159	3172	3268	3352	3407	3460	3511	3553						L5A-PDZ	8	0.0221163	0.0601165	0.0366519	0.0386142	0.0532101	0.0661357	0.074678	0.0829697	0.0910048	0.0976637	6.30733e-05	0.0244721	5.93098e-05
F	16	Sample X136				2760	3027	2937	2933	3062	3115	3188	3232	3293	3341						L5A-PDZ	8	-0.0219747	0.0169169	0.00365599	0.00307023	0.0221163	0.0300354	0.041034	0.0477148	0.0570419	0.0644348	7.07407e-05	-0.0160398	6.49601e-05
G	16	Sample X160				2748	3143	2994	2956	3138	3189	3221	3276	3334	3365						L5A-SGS	8	-0.0236912	0.0342415	0.0120364	0.00644253	0.0334892	0.0411854	0.0460409	0.0544349	0.0633537	0.0681491	6.9133e-05	-0.00791154	6.50832e-05
H	16	Sample X184				3190	3475	3469	3263	3270	3414	3451	3509	3549	3591						L5A-SGS	8	0.0413368	0.0853272	0.0843837	0.0524453	0.0535162	0.0757698	0.0815575	0.0906887	0.0970279	0.103721	3.96202e-05	0.0528053	4.04207e-05
I	16	Sample X208				3239	3331	3313	3292	3293	3292	3312	3359	3388	3410						L5A-SGS	8	0.0487813	0.0628907	0.0601165	0.0568884	0.0570419	0.0568884	0.0599626	0.0672194	0.0717199	0.0751458	1.7357e-05	0.0512513	-0.000311556
J	16	Sample X232				3727	3645	3630	3629	3646	3637	3627	3639	3649	3636						PO4-std	8	0.125661	0.112384	0.109971	0.10981	0.112545	0.111096	0.109489	0.111418	0.113028	0.110935	-6.22189e-06	0.116367	1.04449e-05
K	16	Sample X256				3802	3647	3639	3621	3606	3602	3591	3595	3598	3607						PO4-std	8	0.137936	0.112706	0.111418	0.108526	0.106121	0.105481	0.103721	0.104361	0.104841	0.106281	-1.97114e-05	0.121966	-1.85682e-05
L	16	Sample X280				3889	3761	3744	3732	3725	3722	3731	3712	3724	3739						PO4-std	8	0.152336	0.13121	0.128432	0.126475	0.125335	0.124847	0.126312	0.123221	0.125172	0.127616	-1.47359e-05	0.137937	-1.04514e-05
A	17	Sample X17				4284	4453	4354	4267	4601	4888	5055	5216	5364	5507						IRSp53-PDZ	9	0.219967	0.250085	0.232353	0.216978	0.277072	0.331106	0.363627	0.395768	0.426022	0.45592	0.000235666	0.17549	0.000242094
B	17	Sample X41				3319	3550	3594	3677	3921	4113	4280	4433	4566	4662						IRSp53-PDZ	9	0.0610405	0.0971868	0.104201	0.117547	0.157676	0.190226	0.219263	0.246482	0.270637	0.288365	0.000217635	0.0446813	0.000213739
C	17	Sample X65				3739	4129	3997	4053	4355	4490	4643	4770	4865	4957						IRSp53-PDZ	9	0.127616	0.192978	0.170455	0.179959	0.232531	0.256777	0.284837	0.308611	0.32669	0.344444	0.000197833	0.12379	0.000214757
D	17	Sample X89				3384	3862	3766	3921	4225	4415	4588	4750	4898	5030						IRSp53-SGS	9	0.0710981	0.147848	0.132028	0.157676	0.209624	0.243249	0.274678	0.304838	0.33303	0.358706	0.000259264	0.067719	0.000261849
E	17	Sample X113				3449	3940	3671	3669	4057	4278	4424	4578	4711	4841						IRSp53-SGS	9	0.0812439	0.160858	0.116577	0.116254	0.180641	0.218912	0.244864	0.272839	0.297511	0.322099	0.00021867	0.0699777	0.000210447
F	17	Sample X137				3513	3986	3881	4060	4324	4479	4622	4762	4910	5027						IRSp53-SGS	9	0.091321	0.168597	0.151004	0.181153	0.22703	0.254784	0.280948	0.307101	0.335343	0.358117	0.000236162	0.0938426	0.00023689
G	17	Sample X161				3085	3150	3026	2970	3082	3108	3134	3144	3186	3176						4ebp1-70-PDZ	9	0.0255461	0.0352954	0.0167687	0.0085002	0.0250981	0.0289863	0.0328878	0.034392	0.0407312	0.0392187	1.64783e-05	0.0188554	2.55023e-05
H	17	Sample X185				2946	2973	2954	2844	2803	2841	2879	2909	2912	2930						4ebp1-70-PDZ	9	0.00497507	0.00894161	0.00614888	-0.00988434	-0.015802	-0.0103184	-0.00480772	-0.000437919	0	0.00263111	-4.84381e-06	0.00105092	4.52882e-06
I	17	Sample X209				3111	3044	2958	2935	2934	2936	2959	2958	2975	2963						4ebp1-70-PDZ	9	0.0294358	0.0194393	0.00673625	0.00336307	0.00321664	0.00350952	0.00688314	0.00673625	0.00923599	0.00747089	-1.30431e-05	0.0174286	-3.04895e-07
J	17	Sample X233				2745	2825	2798	2662	2669	2719	2736	2739	2745	2741						PYGM15	9	-0.02412	-0.0126306	-0.0165215	-0.0359157	-0.0349257	-0.0278285	-0.0254051	-0.0249769	-0.02412	-0.0246913	-4.50585e-06	-0.02241	2.07618e-06
K	17	Sample X257				2633	2697	2741	2531	2496	2530	2538	2549	2561	2561						PYGM15	9	-0.0400075	-0.0309569	-0.0246913	-0.0542799	-0.0591347	-0.0544189	-0.0533063	-0.0517747	-0.0501014	-0.0501014	-1.78099e-05	-0.0361914	-1.23274e-05
L	17	Sample X281				3259	3395	3603	3356	3338	3343	3371	3366	3372	3378						PYGM15	9	0.0518338	0.0728088	0.105641	0.0667548	0.0639713	0.0647439	0.0690795	0.0683041	0.0692347	0.070166	-1.96798e-06	0.0714346	4.93769e-07
A	18	Sample X18				3026	3170	3016	2888	3051	3118	3171	3172	3175	3169						4ebp1-70-SGS	9	0.0167687	0.0383121	0.0152877	-0.00349857	0.0204796	0.0304853	0.0384631	0.0386142	0.0390675	0.0381611	2.27446e-05	0.0135673	7.04729e-06
B	18	Sample X42				2934	2914	3122	3185	3225	3199	3209	3213	3221	3207						4ebp1-70-SGS	9	0.00321664	0.000292041	0.0310854	0.0405799	0.0466493	0.0427005	0.0442177	0.0448251	0.0460409	0.0439141	3.84941e-05	0.0112557	3.49866e-05
C	18	Sample X66				3098	3070	3076	3018	3074	3117	3145	3144	3157	3181						4ebp1-70-SGS	9	0.0274893	0.0233081	0.0242027	0.0155837	0.0239044	0.0303353	0.0345425	0.034392	0.0363503	0.0399747	1.60565e-05	0.0193744	3.80849e-07
D	18	Sample X90				2828	2844	2847	2815	2901	2965	2981	3025	3058	3097						L5A-PDZ	9	-0.0121974	-0.00988434	-0.0094501	-0.0140733	-0.00160487	0.00776488	0.0101196	0.0166205	0.0215208	0.0273397	3.97965e-05	-0.0202624	3.04238e-05
E	18	Sample X114				3223	3258	3255	3293	3339	3357	3388	3436	3460	3491						L5A-PDZ	9	0.0463451	0.051681	0.0512227	0.0570419	0.0641258	0.0669097	0.0717199	0.0792077	0.0829697	0.0878472	3.93577e-05	0.0422924	3.55942e-05
F	18	Sample X138				2975	3186	3043	3048	3150	3196	3219	3240	3284	3297						L5A-PDZ	9	0.00923599	0.0407312	0.0192908	0.0200336	0.0352954	0.0422458	0.0457369	0.0489337	0.055661	0.0576561	3.90184e-05	0.014071	3.32379e-05
G	18	Sample X162				2817	3250	2908	2804	2968	3075	3074	3095	3124	3133						L5A-SGS	9	-0.0137849	0.0504592	-0.000583854	-0.015658	0.00820601	0.0240536	0.0239044	0.0270405	0.0313856	0.0327375	2.81739e-05	-0.000128334	2.41241e-05
H	18	Sample X186				2939	3169	3268	3247	3344	3366	3416	3440	3450	3487						L5A-SGS	9	0.00394899	0.0381611	0.0532101	0.0500013	0.0648984	0.0683041	0.0760819	0.0798338	0.0814007	0.0872167	6.39825e-05	0.0219162	6.47829e-05
I	18	Sample X210				3132	3067	3067	3109	3148	3185	3218	3232	3252	3274						L5A-SGS	9	0.0325872	0.022861	0.022861	0.0291361	0.0349942	0.0405799	0.0455849	0.0477148	0.0507645	0.0541286	2.8707e-05	0.020897	-0.000300206
J	18	Sample X234				3438	3342	3337	3313	3313	3298	3295	3301	3283	3295						PO4-std	9	0.0795207	0.0645893	0.0638169	0.0601165	0.0601165	0.0578098	0.057349	0.0582707	0.0555076	0.057349	-1.52251e-05	0.0705797	1.44168e-06
K	18	Sample X258				3447	3405	3390	3370	3370	3363	3350	3351	3351	3339						PO4-std	9	0.0809304	0.0743663	0.0720309	0.0689244	0.0689244	0.0678391	0.0658263	0.065981	0.065981	0.0641258	-1.2655e-05	0.0770859	-1.15118e-05
L	18	Sample X282				3741	3635	3671	3635	3657	3623	3631	3625	3633	3618						PO4-std	9	0.127942	0.110775	0.116577	0.110775	0.114317	0.108847	0.110132	0.109168	0.110453	0.108045	-1.14029e-05	0.119545	-7.11836e-06
A	19	Sample X19				4066	4168	3920	3882	4192	4374	4510	4622	4725	4796						IRSp53-PDZ	10	0.182176	0.199713	0.157509	0.151171	0.203876	0.235915	0.26041	0.280948	0.300136	0.313534	0.000144552	0.141807	0.000150981
B	19	Sample X43				3200	3420	3332	3409	3567	3669	3760	3829	3919	3966						IRSp53-PDZ	10	0.0428521	0.0767064	0.063045	0.0749898	0.0998918	0.116254	0.131046	0.142386	0.157342	0.165226	0.000113487	0.0388815	0.000109591
C	19	Sample X67				3776	3971	3760	3731	3915	3958	4059	4077	4166	4204						IRSp53-PDZ	10	0.133666	0.166068	0.131046	0.126312	0.156673	0.163881	0.180982	0.184055	0.199367	0.205963	6.6668e-05	0.124801	8.35919e-05
D	19	Sample X91				3283	3659	3420	3515	3736	3824	3936	4028	4098	4184						IRSp53-SGS	10	0.0555076	0.11464	0.0767064	0.0916374	0.127127	0.141561	0.160188	0.175707	0.187651	0.202487	0.000128736	0.0560794	0.000131322
E	19	Sample X115				3159	3526	3327	3367	3593	3702	3817	3894	3961	4042						IRSp53-SGS	10	0.0366519	0.0933786	0.0622736	0.0684592	0.104041	0.121597	0.140406	0.153168	0.164385	0.178087	0.000124133	0.0377651	0.000115909
F	19	Sample X139				3496	3806	3606	3697	3884	3968	4044	4136	4207	4285						IRSp53-SGS	10	0.0886358	0.138594	0.106121	0.120786	0.151503	0.165563	0.178427	0.194184	0.206485	0.220143	0.00011546	0.0877684	0.000116187
G	19	Sample X163				3025	3111	2966	2979	3040	3069	3079	3107	3112	3126						4ebp1-70-PDZ	10	0.0166205	0.0294358	0.00791191	0.00982497	0.0188453	0.023159	0.0246503	0.0288365	0.0295856	0.0316859	1.4649e-05	0.0132662	2.3673e-05
H	19	Sample X187				2856	2888	2807	2694	2739	2780	2793	2806	2821	2852						4ebp1-70-PDZ	10	-0.00814638	-0.00349857	-0.0152261	-0.0313828	-0.0249769	-0.019108	-0.0172406	-0.0153701	-0.0132079	-0.008726	-1.29324e-06	-0.0149124	8.07939e-06
I	19	Sample X211				2898	2902	2888	2767	2783	2793	2800	2822	2830	2834						4ebp1-70-PDZ	10	-0.00204216	-0.00145907	-0.00349857	-0.0209722	-0.0186773	-0.0172406	-0.0162338	-0.0130636	-0.0119085	-0.0113306	-9.54116e-06	-0.00591793	3.19708e-06
J	19	Sample X235				2679	2745	2785	2613	2600	2645	2681	2682	2685	2692						PYGM15	10	-0.0335099	-0.02412	-0.0183901	-0.0428207	-0.0446454	-0.0383162	-0.0332265	-0.0330848	-0.0326596	-0.0316667	-4.11869e-06	-0.0307728	2.46334e-06
K	19	Sample X259				2456	2534	2526	2393	2400	2431	2448	2465	2467	2469						PYGM15	10	-0.0646567	-0.0538627	-0.0549747	-0.0732975	-0.0723408	-0.0680938	-0.0657578	-0.0634167	-0.0631409	-0.0628651	-3.24075e-06	-0.0622962	2.2417e-06
L	19	Sample X283				3060	3186	3138	3097	3132	3150	3156	3175	3183	3161						PYGM15	10	0.0218185	0.0407312	0.0334892	0.0273397	0.0325872	0.0352954	0.0361996	0.0390675	0.0402772	0.0369536	9.60693e-06	0.0286118	1.20687e-05
A	20	Sample X20				2996	3111	2992	2902	3018	3092	3102	3116	3129	3128						4ebp1-70-SGS	10	0.0123316	0.0294358	0.0117413	-0.00145907	0.0155837	0.026592	0.0280878	0.0301853	0.0321365	0.0319863	1.95791e-05	0.00991466	3.88179e-06
B	20	Sample X44				2956	2916	3072	3087	3137	3089	3131	3119	3116	3125						4ebp1-70-SGS	10	0.00644253	0.000584158	0.0236062	0.0258448	0.0333388	0.0261436	0.0324369	0.0306353	0.0301853	0.0315358	2.42815e-05	0.00950645	2.0774e-05
C	20	Sample X68				3129	3132	3085	3097	3153	3171	3169	3195	3193	3206						4ebp1-70-SGS	10	0.0321365	0.0325872	0.0255461	0.0273397	0.0357474	0.0384631	0.0381611	0.0420942	0.0417912	0.0437623	1.4494e-05	0.0270665	-1.18162e-06
D	20	Sample X92				3021	3015	2956	2939	2963	3016	3040	3072	3092	3108						L5A-PDZ	10	0.0160279	0.0151397	0.00644253	0.00394899	0.00747089	0.0152877	0.0188453	0.0236062	0.026592	0.0289863	1.6925e-05	0.00607975	7.55233e-06
E	20	Sample X116				3033	3043	3037	3075	3124	3171	3201	3215	3233	3258						L5A-PDZ	10	0.0178065	0.0192908	0.0184	0.0240536	0.0313856	0.0384631	0.0430038	0.0451289	0.0478671	0.051681	3.54787e-05	0.0124208	3.17152e-05
F	20	Sample X140				3289	3313	3288	2994	2922	3002	3072	3105	3147	3155						L5A-PDZ	10	0.0564279	0.0601165	0.0562745	0.0120364	0.00146097	0.0132176	0.0236062	0.028537	0.0348436	0.0360488	-2.28557e-05	0.0459704	-2.86363e-05
G	20	Sample X164				2973	3240	2991	2950	2992	3043	3077	3123	3140	3147						L5A-SGS	10	0.00894161	0.0489337	0.0115938	0.00556182	0.0117413	0.0192908	0.0243519	0.0312355	0.0337901	0.0348436	1.46081e-05	0.0142635	1.05583e-05
H	20	Sample X188				2854	3176	3438	3326	3204	3227	3302	3312	3332	3343						L5A-SGS	10	-0.00843623	0.0392187	0.0795207	0.0621194	0.0434588	0.0469537	0.0584244	0.0599626	0.063045	0.0647439	3.63649e-05	0.0290822	3.71653e-05
I	20	Sample X212				3165	3142	3131	3138	3120	3147	3153	3155	3166	3187						L5A-SGS	10	0.0375572	0.034091	0.0324369	0.0334892	0.0307853	0.0348436	0.0357474	0.0360488	0.0377081	0.0408826	4.24954e-06	0.0328093	-0.000324663
J	20	Sample X236				3135	3102	3097	3096	3089	3098	3079	3068	3066	3072						PO4-std	10	0.0330381	0.0280878	0.0273397	0.0271901	0.0261436	0.0274893	0.0246503	0.02301	0.022712	0.0236062	-7.59797e-06	0.0308855	9.06883e-06
K	20	Sample X260				3378	3207	3198	3180	3164	3171	3154	3160	3155	3180						PO4-std	10	0.070166	0.0439141	0.0425489	0.0398234	0.0374063	0.0384631	0.0358981	0.0368028	0.0360488	0.0398234	-1.85651e-05	0.0532286	-1.7422e-05
L	20	Sample X284				3485	3366	3360	3355	3360	3352	3359	3349	3343	3347						PO4-std	10	0.0869016	0.0683041	0.0673743	0.0666	0.0673743	0.0661357	0.0672194	0.0656716	0.0647439	0.0653622	-1.1448e-05	0.0754375	-7.16346e-06
A	21	Sample X21				4070	4199	4188	3982	3923	4112	4254	4334	4419	4482						IRSp53-PDZ	11	0.182859	0.205093	0.203181	0.167922	0.158011	0.190054	0.214697	0.228802	0.243967	0.255327	6.18584e-05	0.167876	6.82867e-05
B	21	Sample X45				3173	3288	3186	3236	3334	3419	3483	3511	3555	3609						IRSp53-PDZ	11	0.0387653	0.0562745	0.0407312	0.0483241	0.0633537	0.0765502	0.0865865	0.0910048	0.0979818	0.106602	6.47389e-05	0.031774	6.08429e-05
C	21	Sample X69				3618	3614	3520	3595	3679	3737	3828	3824	3872	3895						IRSp53-PDZ	11	0.108045	0.107403	0.0924285	0.104361	0.117871	0.12729	0.142221	0.141561	0.149508	0.153335	5.40916e-05	0.0919473	7.10155e-05
D	21	Sample X93				3361	3693	3321	3390	3503	3582	3633	3685	3723	3756						IRSp53-SGS	11	0.0675292	0.120137	0.0613486	0.0720309	0.0897407	0.102284	0.110453	0.118842	0.125009	0.130392	5.12699e-05	0.0690148	5.38552e-05
E	21	Sample X117				3177	3435	3244	3281	3410	3462	3505	3547	3597	3623						IRSp53-SGS	11	0.0393698	0.0790512	0.0495437	0.055201	0.0751458	0.0832838	0.0900566	0.0967101	0.104681	0.108847	5.82443e-05	0.0432424	5.00207e-05
F	21	Sample X141				3506	3663	3418	3532	3659	3728	3782	3832	3914	3921						IRSp53-SGS	11	0.0902146	0.115285	0.0763941	0.0943295	0.11464	0.125823	0.13465	0.142882	0.156506	0.157676	6.8701e-05	0.0796195	6.94284e-05
G	21	Sample X165				3243	3179	3079	3099	3117	3135	3152	3140	3140	3137						4ebp1-70-PDZ	11	0.0493911	0.0396722	0.0246503	0.0276389	0.0303353	0.0330381	0.0355967	0.0337901	0.0337901	0.0333388	-5.7258e-06	0.0375596	3.29816e-06
H	21	Sample X189				2993	3018	2891	2832	2854	2864	2878	2878	2893	2886						4ebp1-70-PDZ	11	0.0118888	0.0155837	-0.00306185	-0.0116196	-0.00843623	-0.00698624	-0.00495309	-0.00495309	-0.0027706	-0.00378962	-1.30098e-05	0.00589608	-3.63713e-06
I	21	Sample X213				2891	2921	2927	2763	2754	2765	2773	2789	2793	2802						4ebp1-70-PDZ	11	-0.00306185	0.00131478	0.00219216	-0.0215452	-0.0228333	-0.0212587	-0.0201122	-0.0178155	-0.0172406	-0.0159459	-1.71722e-05	-0.00332732	-4.43394e-06
J	21	Sample X237				2628	2645	2608	2585	2594	2609	2633	2647	2651	2653						PYGM15	11	-0.0407115	-0.0383162	-0.0435229	-0.0467471	-0.0454865	-0.0433825	-0.0400075	-0.0380341	-0.0374696	-0.0371872	4.41475e-06	-0.0437353	1.09968e-05
K	21	Sample X261				2400	2409	2373	2361	2367	2388	2414	2420	2424	2438						PYGM15	11	-0.0723408	-0.0711095	-0.0760263	-0.0776603	-0.0768436	-0.0739804	-0.0704249	-0.0696027	-0.0690543	-0.0671325	5.957e-06	-0.0759917	1.14394e-05
L	21	Sample X285				2790	2909	2919	2902	2880	2846	2846	2848	2852	2840						PYGM15	11	-0.0176718	-0.000437919	0.00102248	-0.00145907	-0.00466233	-0.00959486	-0.00959486	-0.00930532	-0.008726	-0.0104631	-3.74327e-06	-0.00484331	-1.28152e-06
A	22	Sample X22				3276	3348	3203	3076	3259	3318	3365	3371	3392	3386						4ebp1-70-SGS	11	0.0544349	0.0655169	0.0433071	0.0242027	0.0518338	0.0608864	0.0681491	0.0690795	0.072342	0.071409	2.37523e-05	0.0438648	8.05503e-06
B	22	Sample X46				2892	2927	3116	3058	3119	3144	3151	3156	3154	3161						4ebp1-70-SGS	11	-0.00291623	0.00219216	0.0301853	0.0215208	0.0306353	0.034392	0.0354461	0.0361996	0.0358981	0.0369536	3.38573e-05	0.00573631	3.03498e-05
C	22	Sample X70				3173	3375	3145	3102	3136	3193	3223	3234	3231	3257						4ebp1-70-SGS	11	0.0387653	0.0697003	0.0345425	0.0280878	0.0331885	0.0417912	0.0463451	0.0480194	0.0475625	0.0515282	4.57886e-06	0.0412058	-1.10967e-05
D	22	Sample X94				2961	2933	2983	2967	3007	3036	3046	3052	3071	3088						L5A-PDZ	11	0.00717698	0.00307023	0.0104143	0.00805895	0.0139565	0.0182516	0.0197364	0.0206283	0.0234571	0.0259942	2.03263e-05	0.00287867	1.09536e-05
E	22	Sample X118				3082	3110	3042	3061	3116	3164	3175	3192	3202	3217						L5A-PDZ	11	0.0250981	0.0292859	0.0191423	0.0219674	0.0301853	0.0374063	0.0390675	0.0416397	0.0431554	0.0454329	2.27832e-05	0.0195681	1.90197e-05
F	22	Sample X142				3024	3194	2985	2979	3063	3134	3165	3165	3181	3192						L5A-PDZ	11	0.0164723	0.0419427	0.010709	0.00982497	0.0222652	0.0328878	0.0375572	0.0375572	0.0399747	0.0416397	2.22621e-05	0.0157258	1.64816e-05
G	22	Sample X166				2915	3059	2918	2897	2977	3037	3063	3046	3052	3060						L5A-SGS	11	0.00043809	0.0216697	0.000876352	-0.00218789	0.00953044	0.0184	0.0222652	0.0197364	0.0206283	0.0218185	1.82658e-05	0.00235801	1.4216e-05
H	22	Sample X190				3006	3146	3179	3207	3185	3231	3247	3243	3248	3269						L5A-SGS	11	0.0138087	0.034693	0.0396722	0.0439141	0.0405799	0.0475625	0.0500013	0.0493911	0.0501539	0.0533632	2.71745e-05	0.0260093	2.7975e-05
I	22	Sample X214				2953	2937	2960	3006	3040	3067	3097	3116	3128	3147						L5A-SGS	11	0.00600209	0.00365599	0.00703005	0.0138087	0.0188453	0.022861	0.0273397	0.0301853	0.0319863	0.0348436	3.12258e-05	0.000920324	-0.000297687
J	22	Sample X238				3011	3009	3021	2999	2994	2966	2969	2965	2969	2973						PO4-std	11	0.0145479	0.0142522	0.0160279	0.0127745	0.0120364	0.00791191	0.00835309	0.00776488	0.00835309	0.00894161	-7.59872e-06	0.0156556	9.06809e-06
K	22	Sample X262				3179	3146	3155	3111	3106	3098	3096	3107	3102	3107						PO4-std	11	0.0396722	0.034693	0.0360488	0.0294358	0.0286867	0.0274893	0.0271901	0.0288365	0.0280878	0.0288365	-9.48253e-06	0.0365872	-8.33934e-06
L	22	Sample X286				3492	3610	3594	3533	3503	3489	3499	3492	3500	3495						PO4-std	11	0.0880049	0.106762	0.104201	0.0944881	0.0897407	0.0875319	0.0891092	0.0880049	0.0892671	0.088478	-1.09864e-05	0.0991506	-6.7019e-06
A	23	Sample X23				4112	4168	4189	3921	3843	3993	4025	4072	4088	4107						IRSp53-PDZ	12	0.190054	0.199713	0.203355	0.157676	0.1447	0.169779	0.175198	0.183201	0.185937	0.189195	-6.42838e-06	0.183738	0
B	23	Sample X47				3187	3256	3158	3117	3146	3183	3190	3206	3212	3223						IRSp53-PDZ	12	0.0408826	0.0513754	0.0365011	0.0303353	0.034693	0.0402772	0.0413368	0.0437623	0.0446732	0.0463451	3.89606e-06	0.0386806	0
C	23	Sample X71				3769	3755	3507	3459	3510	3562	3563	3575	3597	3585						IRSp53-PDZ	12	0.132519	0.130228	0.0903726	0.0828127	0.0908467	0.0990956	0.0992548	0.101167	0.104681	0.102763	-1.6924e-05	0.113528	0
D	23	Sample X95				3343	3395	3118	3134	3188	3229	3240	3254	3261	3297						IRSp53-SGS	12	0.0647439	0.0728088	0.0304853	0.0328878	0.041034	0.0472581	0.0489337	0.0510699	0.0521395	0.0576561	-2.58533e-06	0.0514529	0
E	23	Sample X119				3120	3182	3002	3033	3072	3122	3127	3153	3139	3154						IRSp53-SGS	12	0.0307853	0.0401259	0.0132176	0.0178065	0.0236062	0.0310854	0.0318361	0.0357474	0.0336396	0.0358981	8.22363e-06	0.0244406	0
F	23	Sample X143				3478	3555	3275	3321	3383	3413	3411	3434	3428	3447						IRSp53-SGS	12	0.0857993	0.0979818	0.0542817	0.0613486	0.0709427	0.0756137	0.0753017	0.0788947	0.0779563	0.0809304	-7.2742e-07	0.0763416	0
G	23	Sample X167				3225	3265	3119	3065	3100	3128	3128	3140	3136	3159						4ebp1-70-PDZ	12	0.0466493	0.0527512	0.0306353	0.022563	0.0277885	0.0319863	0.0319863	0.0337901	0.0331885	0.0366519	-9.02396e-06	0.0402134	0
H	23	Sample X191				3016	3037	2926	2875	2883	2891	2920	2918	2939	2941						4ebp1-70-PDZ	12	0.0152877	0.0184	0.00204589	-0.00538907	-0.00422606	-0.00306185	0.00116862	0.000876352	0.00394899	0.00424206	-9.37263e-06	0.00895284	0
I	23	Sample X215				2930	2948	3012	2827	2797	2826	2849	2871	2862	2873						4ebp1-70-PDZ	12	0.00263111	0.00526841	0.0146959	-0.0123418	-0.0166654	-0.0124862	-0.00916052	-0.00597012	-0.00727639	-0.00567964	-1.27382e-05	0.00294447	0
J	23	Sample X239				2758	2842	2777	2696	2705	2721	2735	2731	2743	2745						PYGM15	12	-0.022261	-0.0101737	-0.0195384	-0.0310989	-0.0298203	-0.0275437	-0.0255478	-0.0261184	-0.0244057	-0.02412	-6.58203e-06	-0.0201136	0
K	23	Sample X263				2537	2632	2504	2441	2459	2474	2503	2503	2510	2524						PYGM15	12	-0.0534454	-0.0401484	-0.0580269	-0.0667203	-0.0642435	-0.0621753	-0.0581654	-0.0581654	-0.0571953	-0.0552525	-5.48245e-06	-0.0540644	0
L	23	Sample X287				3851	3413	3615	3665	3652	3632	3613	3620	3652	3654						PYGM15	12	0.146025	0.0756137	0.107563	0.115608	0.113511	0.110292	0.107243	0.108365	0.113511	0.113834	-2.46175e-06	0.112634	0
A	24	Sample X24				3463	3513	3469	3366	3473	3513	3532	3548	3539	3558						4ebp1-70-SGS	12	0.0834409	0.091321	0.0843837	0.0683041	0.0850126	0.091321	0.0943295	0.096869	0.0954399	0.098459	1.56973e-05	0.0794697	0
B	24	Sample X48				3096	3465	3145	3060	3176	3177	3229	3227	3237	3227						4ebp1-70-SGS	12	0.0271901	0.083755	0.0345425	0.0218185	0.0392187	0.0393698	0.0472581	0.0469537	0.0484765	0.0469537	3.50747e-06	0.0414492	0
C	24	Sample X72				3231	3310	3116	3158	3217	3283	3283	3286	3310	3314						4ebp1-70-SGS	12	0.0475625	0.0596548	0.0301853	0.0365011	0.0454329	0.0555076	0.0555076	0.0559677	0.0596548	0.0602704	1.56756e-05	0.0412191	0
D	24	Sample X96				3023	3070	3119	3033	3040	3074	3104	3094	3107	3119						L5A-PDZ	12	0.0163242	0.0233081	0.0306353	0.0178065	0.0188453	0.0239044	0.0283872	0.026891	0.0288365	0.0306353	9.37267e-06	0.0189338	0
E	24	Sample X120				3271	3112	3096	3149	3163	3164	3182	3199	3191	3197						L5A-PDZ	12	0.0536693	0.0295856	0.0271901	0.0351448	0.0372553	0.0374063	0.0401259	0.0427005	0.0414882	0.0423973	3.76349e-06	0.0364382	0
F	24	Sample X144				3169	3298	3172	3163	3201	3238	3246	3217	3242	3240						L5A-PDZ	12	0.0381611	0.0578098	0.0386142	0.0372553	0.0430038	0.0486289	0.0498488	0.0454329	0.0492387	0.0489337	5.78055e-06	0.0422244	0
G	24	Sample X168				3062	3121	2995	3032	3074	3088	3075	3090	3083	3083						L5A-SGS	12	0.0221163	0.0309354	0.012184	0.0176582	0.0239044	0.0259942	0.0240536	0.0262931	0.0252474	0.0252474	4.0498e-06	0.0209335	0
H	24	Sample X192				3386	3595	3436	3362	3430	3451	3439	3441	3453	3456						L5A-SGS	12	0.071409	0.104361	0.0792077	0.0676842	0.078269	0.0815575	0.0796773	0.0799904	0.0818712	0.0823419	-8.00459e-07	0.0811172	0
I	24	Sample X216				54	57	56	3247	3048	3010	3117	3042	2539	2497						L5A-SGS	12	-0.351797	-0.351486	-0.35159	0.0500013	0.0200336	0.0144001	0.0303353	0.0191423	-0.0531671	-0.0589963	0.000328913	-0.30066	0
J	24	Sample X240				3024	3052	2959	2939	2932	2921	2911	2919	2910	2918						PO4-std	12	0.0164723	0.0206283	0.00688314	0.00394899	0.00292384	0.00131478	-0.000145992	0.00102248	-0.000291965	0.000876352	-1.66668e-05	0.0153633	0
K	24	Sample X264				3168	3170	3162	3165	3158	3156	3152	3163	3164	3160						PO4-std	12	0.0380101	0.0383121	0.0371045	0.0375572	0.0365011	0.0361996	0.0355967	0.0372553	0.0374063	0.0368028	-1.14319e-06	0.0377605	0
L	24	Sample X288				1951	1879	1884	1882	1890	1871	1881	1887	1881	1877						PO4-std	12	-0.132044	-0.141313	-0.140672	-0.140929	-0.139903	-0.142338	-0.141057	-0.140288	-0.141057	-0.14157	-4.28452e-06	-0.137546	0
[truncated: 12 more columns]
