# Supplementary material for: PDZ-directed substrate recruitment is the primary determinant of specific 4E-BP1 dephosphorylation by PP1-Neurabin
Source: eLife journal article supplement (doi:10.7554/elife.103403), 2024-11-20
Supplement: fig5-data1 [file Peptides with 1nM PP1.xlsx]

## Sheet: All Cycles
Well Row	Well Col	Content	Raw Data (420-10/455-20)	Temperature	Raw Data (425-10/460-20)	Raw Data (425-10/460-20)	Raw Data (425-10/460-20)	Raw Data (425-10/460-20)	Raw Data (425-10/460-20)	Raw Data (425-10/460-20)	Raw Data (425-10/460-20)	Raw Data (425-10/460-20)	Raw Data (425-10/460-20)	Raw Data (425-10/460-20)							Well Col
		Time [s]	0	0	0	120	240	360	480	600	720	840	960	1080			12.8	15786.3	16531.7			60	180	300	420	540	660	780	900	1020	1140	Rates	const…	Norm. rate			IRSp53-PDZ			IRSp53-SGS			4ebp1-70-PDZ			4ebp1-70-SGS			L5A-PDZ
A	1	Sample X1			8041	7921	8097	8212	8419	8634	8906	9294	9725	10123			6.4	14385	14933.5	IRSp53-PDZ	1	1.1244	1.08536	1.14293	1.18164	1.2536	1.33161	1.43544	1.59443	1.78798	1.98491	0.000795953	0.914658	0.000799859		200	0.000799859	0.000495412	0.000557365	0.000431913	0.000442092	0.000460825	0.0010462	0.000745491	0.000878467	6.21531e-05	0.000115545	7.87111e-05	0.000112211
B	1	Sample X25			5539	5706	5979	6194	6410	6651	6831	7065	7310	7599			3.2	12742.9	12583.7	IRSp53-PDZ	1	0.462702	0.498658	0.559542	0.609429	0.661369	0.721601	0.768243	0.831119	0.899828	0.984933	0.00047489	0.414808	0.000495412		100	0.000304131	0.000240863	0.000248747	0.000191261	0.000193508	0.000213072	0.000562508	0.000372923	0.000425819	2.38387e-05	7.59614e-05	5.05754e-05	6.55222e-05
C	1	Sample X49			5929	6092	6350	6570	6821	7021	7263	7511	7807	8070			1.6	9547.3	9765	IRSp53-PDZ	1	0.54819	0.585542	0.646752	0.70108	0.765614	0.819096	0.88641	0.958535	1.0491	1.13397	0.000539661	0.485632	0.000557365		50	0.00013856	0.000112344	0.00012726	0.00010889	8.9894e-05	9.91567e-05	0.000220549	0.000148402	0.000188102	5.1327e-05	2.61708e-05	2.13742e-05	1.7617e-05
D	1	Sample X73			4253	4528	4752	5005	5194	5437	5663	5943	6191	6482			0.8	5536.8	7321.2	IRSp53-SGS	1	0.214522	0.263688	0.305215	0.353804	0.39133	0.441201	0.489309	0.551359	0.608721	0.679106	0.000418363	0.178807	0.000431913		25	2.46605e-05	5.36581e-05	6.54259e-05	5.39025e-05	3.87836e-05	5.73397e-05	8.67579e-05	7.29482e-05	0.000100017	1.42784e-05	1.27158e-05	9.6341e-06	9.37645e-06
E	1	Sample X97			4495	4743	4971	5184	5395	5617	5855	6148	6412	6716			0.4	5584.5	5298.8	IRSp53-SGS	1	0.257684	0.30352	0.347167	0.389317	0.432447	0.479378	0.531556	0.598607	0.661859	0.738276	0.000432553	0.214449	0.000442092		12.5	3.83776e-05	2.83978e-05	4.52516e-05	1.7087e-05	1.32345e-06	2.25591e-05	3.09636e-05	3.49746e-05	6.15308e-05	-3.5332e-05	-1.11648e-05	9.07168e-06	-7.51488e-06
F	1	Sample X121			4473	4721	4984	5209	5446	5666	5930	6187	6457	6780			0.2	4462.4	4354.3	IRSp53-SGS	1	0.253698	0.299386	0.349701	0.394354	0.443084	0.489959	0.548416	0.607777	0.672923	0.75488	0.000450749	0.210968	0.000460825		6.25	2.23452e-05	3.32932e-05	3.45957e-05	3.03658e-05	3.18618e-05	1.86347e-05	2.85356e-06	3.96088e-06	3.18695e-05	-4.21339e-05	4.32952e-06	-1.44754e-05	-6.70721e-06
G	1	Sample X145			4316	4833	5354	5824	6260	6705	7214	7750	8259	8760			0.1	3627.6	3781.2	4ebp1-70-PDZ	1	0.225614	0.320572	0.423956	0.524647	0.625101	0.735441	0.872542	1.03126	1.19772	1.37897	0.001046	0.105983	0.0010462		3.125	2.53912e-05	-2.2775e-06	1.628e-05	2.37105e-05	1.0048e-05	4.7971e-06	-2.82169e-06	-7.16335e-06	1.18276e-05	-3.62451e-05	-7.49779e-07	-1.53615e-05	-4.96405e-06
H	1	Sample X169			4129	4427	4805	5177	5522	5933	6344	6800	7218	7602			0.05	2621.8	3357.2	4ebp1-70-PDZ	1	0.192978	0.245404	0.315242	0.38791	0.459095	0.549095	0.645299	0.760106	0.87367	0.985841	0.00073839	0.09843	0.000745491		1.5625	-5.72973e-05	-1.85246e-07	1.0709e-05	1.72814e-05	-5.24142e-06	1.0877e-06	-2.03603e-05	-1.10303e-05	5.59077e-06	-3.42279e-05	8.84179e-06	4.30075e-06	-8.32167e-06
I	1	Sample X193			4127	4615	5065	5477	5935	6362	6840	7243	7632	7970			0.025	3131.2	3234.6	4ebp1-70-PDZ	1	0.192633	0.279655	0.365601	0.449592	0.549547	0.649664	0.770614	0.880735	0.994945	1.10119	0.00084964	0.113633	0.000878467		0.78125	-8.28386e-05	-1.93004e-05	-7.82318e-06	4.79511e-06	-5.22109e-06	-4.89862e-06	-2.82876e-05	-1.15189e-05	6.18602e-06	-2.92422e-05	-4.23602e-06	-1.42567e-05	-9.04845e-06
J	1	Sample X217			6107	6427	6724	7022	7307	7529	7780	8185	8642	9009			0.0125	2627.6	3138.5	PYGM15	1	0.58903	0.665538	0.740342	0.819369	0.898968	0.963899	1.04062	1.17248	1.33458	1.47634	0.000785782	0.498647	0.000809053		0.390625	-1.51697e-05	5.40741e-07	1.1881e-06	2.59271e-05	-1.57689e-05	1.9258e-06	-9.97589e-06	-1.25784e-05	8.62055e-06	-3.36074e-05	2.92536e-06	-7.32721e-06	-2.48906e-05
K	1	Sample X241			5296	5553	5818	6087	6331	6508	6757	7151	7485	7792			0	2907.4	3036.8	PYGM15	1	0.412036	0.46568	0.523313	0.584381	0.642154	0.685564	0.748891	0.854892	0.950818	1.04438	0.000569794	0.349335	0.000586813		0.195312	-2.55407e-05	2.21469e-05	5.81082e-07	-1.15128e-05	4.39588e-06	4.19261e-06	-5.071e-06	-3.69258e-06	-1.26094e-05	-3.24547e-05	2.24575e-06	5.03442e-05	-1.86505e-05
L	1	Sample X265			7705	8092	8461	8793	9060	9462	10001	10522	10914	11345						PYGM15	1	1.01732	1.14127	1.26857	1.39158	1.49694	1.66762	1.92253	2.20264	2.43955	2.73101	0.00156288	0.790172	0.00158178		0	0	0	0	0	0	0	0	0	0	0	0	0	0
A	2	Sample X2			5003	4729	4831	4935	5003	5073	5133	5191	5225	5336						4ebp1-70-SGS	1	0.353413	0.300887	0.32019	0.340176	0.353413	0.367182	0.3791	0.390726	0.397588	0.420245	8.89704e-05	0.30891	6.21531e-05
B	2	Sample X26			3608	3582	3683	3769	3850	3921	3997	4055	4120	4209						4ebp1-70-SGS	1	0.106441	0.102284	0.118518	0.132519	0.145859	0.157676	0.170455	0.1803	0.191429	0.206834	9.90951e-05	0.0917745	0.000115545		*1000000
C	2	Sample X50			4651	4612	4679	4733	4755	4783	4818	4886	4994	5089						4ebp1-70-SGS	1	0.286321	0.279101	0.291531	0.301639	0.30578	0.31107	0.317714	0.330721	0.351653	0.370349	7.64436e-05	0.268722	7.87111e-05			IRSp53-PDZ			IRSp53-SGS			4ebp1-70-PDZ			4ebp1-70-SGS			L5A-PDZ
D	2	Sample X74			5025	5099	5172	5262	5343	5404	5475	5540	5592	5648						L5A-PDZ	1	0.357725	0.372333	0.386906	0.405098	0.421687	0.434318	0.449171	0.462915	0.474011	0.486063	0.000120792	0.352547	0.000112211		200	0.0479915	0.0297247	0.0334419	0.0259148	0.0265255	0.0276495	0.062772	0.0447295	0.052708	0.00372919	0.00693272	0.00472267	0.00673268
E	2	Sample X98			5132	5234	5303	5404	5496	5557	5653	5727	5852	5953						L5A-PDZ	1	0.378901	0.399411	0.413469	0.434318	0.453596	0.466532	0.487144	0.503248	0.530886	0.553627	0.000157231	0.367775	0.000156315		100	0.0182478	0.0144518	0.0149248	0.0114756	0.0116105	0.0127843	0.0337505	0.0223754	0.0255491	0.00143032	0.00455769	0.00303452	0.00393133
F	2	Sample X122			2786	2885	2959	3030	3108	3196	3284	3371	3447	3582						L5A-PDZ	1	-0.0182465	-0.00393512	0.00688314	0.0173616	0.0289863	0.0422458	0.055661	0.0690795	0.0809304	0.102284	0.000106968	-0.026056	0.000119263		50	0.0083136	0.00674063	0.00763561	0.00653339	0.00539364	0.0059494	0.0132329	0.00890413	0.0112861	0.00307962	0.00157025	0.00128245	0.00105702
G	2	Sample X146			5959	6144	6336	6509	6661	6853	7033	7258	7502	7761						L5A-SGS	1	0.55499	0.597669	0.643363	0.685813	0.724154	0.774045	0.822366	0.884989	0.955859	1.03469	0.000428903	0.510452	0.000428926		25	0.00147963	0.00321949	0.00392555	0.00323415	0.00232701	0.00344038	0.00520547	0.00437689	0.00600101	0.000856704	0.000762946	0.000578046	0.000562587
H	2	Sample X170			4362	4597	4788	4967	5139	5320	5497	5671	5858	6071						L5A-SGS	1	0.233777	0.276335	0.312017	0.346388	0.380298	0.416955	0.453807	0.491044	0.532227	0.580674	0.000311483	0.215462	0.000305114		12.5	0.00230266	0.00170387	0.00271509	0.00102522	7.94068e-05	0.00135355	0.00185782	0.00209848	0.00369185	-0.00211992	-0.000669891	0.000544301	-0.000450893
I	2	Sample X194			4634	4902	5142	5312	5502	5641	5827	6036	6231	6438						L5A-SGS	1	0.283169	0.333801	0.380897	0.415313	0.454863	0.48455	0.525314	0.572597	0.618194	0.668241	0.000342151	0.268403	0.000342578		6.25	0.00134071	0.00199759	0.00207574	0.00182195	0.00191171	0.00111808	0.000171214	0.000237653	0.00191217	-0.00252803	0.000259771	-0.000868525	-0.000402433
J	2	Sample X218			15480	15619	15664	15775	15792	15839	15853	15906	15945	15990						PO4-std	1	10.1067	10.7547	10.9793	11.5679	11.6627	11.9318	12.014	12.3338	12.5786	12.8713	0.0023247	10.2853	0.00231855		3.125	0.00152347	-0.00013665	0.000976803	0.00142263	0.00060288	0.000287826	-0.000169302	-0.000429801	0.000709655	-0.00217471	-4.49867e-05	-0.000921692	-0.000297843
K	2	Sample X242			16472	16402	16370	16353	16477	16545	16592	16640	16707	16759						PO4-std	1	16.9273	16.2082	15.8972	15.7361	16.9809	17.7395	18.2999	18.9055	19.8132	20.5732	0.00411812	15.2372	0.00411191		1.5625	-0.00343784	-1.11148e-05	0.000642538	0.00103688	-0.000314485	6.52621e-05	-0.00122162	-0.000661816	0.000335446	-0.00205368	0.000530508	0.000258045	-0.0004993
L	2	Sample X266			22216	22249	22233	22250	22300	22244	22319	22296	22435	22460						PO4-std	1	-10.9624	-10.8901	-10.925	-10.8879	-10.7807	-10.901	-10.7407	-10.7892	-10.5041	-10.4548	0.000417724	-11.0342	-0.000103301		0.78125	-0.00497031	-0.00115803	-0.000469391	0.000287707	-0.000313265	-0.000293917	-0.00169726	-0.000691133	0.000371161	-0.00175453	-0.000254161	-0.000855403	-0.000542907
A	3	Sample X3			6380	6367	6529	6680	6798	6916	6993	7139	7380	7599						IRSp53-PDZ	2	0.654042	0.650879	0.690801	0.729018	0.759583	0.790783	0.811495	0.851553	0.920027	0.984933	0.000300225	0.604177	0.000304131		0.390625	-0.000910183	3.24445e-05	7.12862e-05	0.00155562	-0.000946136	0.000115548	-0.000598553	-0.000754702	0.000517233	-0.00201644	0.000175522	-0.000439633	-0.00149344
B	3	Sample X27			4675	4587	4784	4923	5057	5212	5354	5455	5610	5762						IRSp53-PDZ	2	0.290785	0.274494	0.31126	0.337854	0.364022	0.39496	0.423956	0.44497	0.477873	0.510931	0.000220341	0.250906	0.000240863		0.195312	-0.00153244	0.00132881	3.48649e-05	-0.000690771	0.000263753	0.000251556	-0.00030426	-0.000221555	-0.000756567	-0.00194728	0.000134745	0.00302065	-0.00111903
C	3	Sample X51			4460	4471	4679	4856	4976	5100	5235	5385	5540	5675						IRSp53-PDZ	2	0.251348	0.253336	0.291531	0.324966	0.348141	0.372532	0.399614	0.430371	0.462915	0.491912	0.000231043	0.224041	0.000248747		0	0	0	0	0	0	0	0	0	0	0	0	0	0
D	3	Sample X75			4011	4126	4253	4373	4462	4553	4633	4780	4958	5110						IRSp53-SGS	2	0.172824	0.192461	0.214522	0.235737	0.251709	0.268255	0.282984	0.310502	0.344638	0.374519	0.000177711	0.158189	0.000191261
E	3	Sample X99			3939	4078	4234	4341	4447	4533	4628	4761	4932	5099						IRSp53-SGS	2	0.16069	0.184226	0.211196	0.230044	0.249003	0.2646	0.282058	0.306912	0.339595	0.372333	0.000183969	0.149684	0.000193508
F	3	Sample X123			3974	4164	4315	4453	4586	4713	4813	4920	5064	5221						IRSp53-SGS	2	0.166574	0.19902	0.225437	0.250085	0.27431	0.297886	0.316763	0.337274	0.365403	0.396779	0.000202996	0.161155	0.000213072
G	3	Sample X147			3943	4271	4639	4970	5273	5591	5898	6230	6554	6830						4ebp1-70-PDZ	2	0.161361	0.217681	0.284095	0.346972	0.407338	0.473796	0.541197	0.617956	0.69706	0.76798	0.000562306	0.11416	0.000562508
H	3	Sample X171			3845	4027	4227	4460	4683	4905	5140	5396	5633	5890						4ebp1-70-PDZ	2	0.145031	0.175538	0.209973	0.251348	0.292277	0.334379	0.380498	0.432654	0.482824	0.539399	0.000365822	0.104899	0.000372923
I	3	Sample X195			3691	3902	4106	4332	4551	4811	5086	5386	5660	5922						4ebp1-70-PDZ	2	0.119813	0.154502	0.189023	0.228447	0.267889	0.316382	0.369755	0.430578	0.488659	0.546608	0.000396992	0.0729706	0.000425819
J	3	Sample X219			4586	4734	4853	5027	5168	5280	5404	5521	5766	6017						PYGM15	2	0.27431	0.301827	0.324392	0.358117	0.386103	0.408766	0.434318	0.458883	0.511812	0.568232	0.00025449	0.249982	0.000277761
K	3	Sample X243			4136	4255	4390	4495	4594	4691	4823	5042	5306	5521						PYGM15	2	0.194184	0.214872	0.238772	0.257684	0.275782	0.29377	0.318666	0.361066	0.414083	0.458883	0.000231776	0.163711	0.000248795
L	3	Sample X267			5130	5288	5438	5545	5667	5883	6223	6536	6776	7024						PYGM15	2	0.378502	0.4104	0.44141	0.463978	0.490176	0.537827	0.616294	0.692551	0.753836	0.819913	0.000410963	0.313911	0.000429854
A	4	Sample X4			4182	4137	4202	4255	4214	4130	4187	4321	4445	4537						4ebp1-70-SGS	2	0.20214	0.194356	0.205615	0.214872	0.207705	0.19315	0.203008	0.226499	0.248643	0.26533	5.0656e-05	0.185738	2.38387e-05
B	4	Sample X28			3311	3286	3392	3475	3518	3538	3546	3569	3641	3740						4ebp1-70-SGS	2	0.0598087	0.0559677	0.072342	0.0853272	0.092112	0.0952812	0.0965513	0.10021	0.11174	0.127779	5.95113e-05	0.0540052	7.59614e-05
C	4	Sample X52			4298	4225	4270	4320	4326	4347	4376	4437	4497	4567						4ebp1-70-SGS	2	0.222435	0.209624	0.217505	0.226322	0.227384	0.231109	0.236272	0.247202	0.258047	0.27082	4.83079e-05	0.205687	5.05754e-05
D	4	Sample X76			4064	4095	4146	4208	4193	4171	4256	4371	4469	4559						L5A-PDZ	2	0.181835	0.187137	0.195909	0.206659	0.20405	0.200233	0.215048	0.23538	0.252974	0.269354	7.4103e-05	0.170396	6.55222e-05
E	4	Sample X100			4360	4553	4630	4683	4735	4760	4827	4903	5005	5094						L5A-PDZ	2	0.233421	0.268255	0.282428	0.292277	0.302015	0.306723	0.319428	0.333993	0.353804	0.371341	0.000110309	0.240183	0.000109393
F	4	Sample X124			4194	4221	4247	4267	4326	4410	4536	4650	4773	4885						L5A-PDZ	2	0.204224	0.208926	0.213471	0.216978	0.227384	0.242352	0.265148	0.286136	0.309178	0.330529	0.000119258	0.178877	0.000131554
G	4	Sample X148			3884	3939	3994	4075	4182	4337	4475	4635	4774	4881						L5A-SGS	2	0.151503	0.16069	0.169948	0.183714	0.20214	0.229334	0.25406	0.283354	0.309367	0.32976	0.000174258	0.122832	0.000174281
H	4	Sample X172			3510	3604	3679	3781	3909	4009	4139	4269	4408	4537						L5A-SGS	2	0.0908467	0.105801	0.117871	0.134486	0.155671	0.172486	0.194701	0.217329	0.241994	0.26533	0.000162548	0.0721225	0.000156179
I	4	Sample X196			4239	4338	4400	4420	4382	4503	4645	4803	4943	5077						L5A-SGS	2	0.21207	0.229511	0.240561	0.244146	0.237343	0.259137	0.285208	0.314862	0.341726	0.367973	0.000136622	0.191281	0.000137049
J	4	Sample X220			14247	14364	14315	14365	14384	14386	14451	14413	14474	14451						PO4-std	2	6.32009	6.57669	6.46737	6.57895	6.6221	6.62666	6.77769	6.68878	6.83237	6.77769	0.000384647	6.39605	0.000378498
K	4	Sample X244			14765	14832	14814	14810	14932	14923	14999	15062	15084	15114						PO4-std	2	7.58619	7.77783	7.72562	7.71409	8.07819	8.05042	8.28971	8.49666	8.57086	8.67371	0.00105521	7.4632	0.001049
L	4	Sample X268			2439	2395	2358	2344	2312	2282	2262	2239	2214	2179						PO4-std	2	-0.0669951	-0.0730243	-0.0780684	-0.0799709	-0.0843068	-0.0883561	-0.0910471	-0.0941335	-0.0974783	-0.102143	-3.05614e-05	-0.0672155	-0.000551587
A	5	Sample X5			5770	5720	5793	5805	5811	5819	5948	6129	6277	6390						IRSp53-PDZ	3	0.512693	0.501716	0.517772	0.520429	0.521759	0.523536	0.552493	0.59416	0.629166	0.656481	0.000134654	0.472228	0.00013856
B	5	Sample X29			4333	4325	4377	4451	4432	4459	4484	4633	4780	4921						IRSp53-PDZ	3	0.228624	0.227207	0.23645	0.249724	0.246302	0.251168	0.255689	0.282984	0.310502	0.337467	9.18224e-05	0.207518	0.000112344
C	5	Sample X53			3637	3698	3836	3926	3978	4047	4079	4133	4263	4398						IRSp53-PDZ	3	0.111096	0.120948	0.143543	0.158513	0.167248	0.178937	0.184397	0.193667	0.216276	0.240203	0.000109556	0.105749	0.00012726
D	5	Sample X77			3897	3937	4039	4080	4105	4113	4179	4319	4422	4536						IRSp53-SGS	3	0.153668	0.160355	0.177576	0.184568	0.188852	0.190226	0.201619	0.226145	0.244505	0.265148	9.534e-05	0.142062	0.00010889
E	5	Sample X101			3721	3793	3871	3901	3949	3948	3999	4085	4183	4311						IRSp53-SGS	3	0.124684	0.136456	0.149342	0.154335	0.162368	0.162201	0.170794	0.185424	0.202313	0.22473	8.03551e-05	0.119052	8.9894e-05
F	5	Sample X125			3653	3743	3811	3859	3875	3917	3965	4066	4177	4298						IRSp53-SGS	3	0.113672	0.128269	0.139417	0.147351	0.150007	0.157007	0.165058	0.182176	0.201272	0.222435	8.9081e-05	0.107218	9.91567e-05
G	5	Sample X149			3953	4072	4235	4366	4456	4486	4658	4885	5102	5314						4ebp1-70-PDZ	3	0.16304	0.183201	0.211371	0.234489	0.250626	0.256052	0.287622	0.330529	0.372929	0.415724	0.000220346	0.13835	0.000220549
H	5	Sample X173			3658	3731	3813	3918	3973	4056	4137	4275	4439	4581						4ebp1-70-PDZ	3	0.114479	0.126312	0.139747	0.157174	0.166405	0.180471	0.194356	0.218384	0.247562	0.273391	0.000141301	0.0970476	0.000148402
I	5	Sample X197			3510	3577	3695	3792	3887	3940	4043	4224	4403	4553						4ebp1-70-PDZ	3	0.0908467	0.101486	0.120462	0.136292	0.152003	0.160858	0.178257	0.209449	0.241098	0.268255	0.000159275	0.0703355	0.000188102
J	5	Sample X221			3752	3812	3875	3939	3967	3985	4026	4171	4341	4455						PYGM15	3	0.129738	0.139582	0.150007	0.16069	0.165395	0.168429	0.175368	0.200233	0.230044	0.250446	0.000101909	0.115848	0.000125179
K	5	Sample X245			3503	3577	3649	3675	3712	3764	3905	4036	4145	4255						PYGM15	3	0.0897407	0.101486	0.113028	0.117224	0.123221	0.1317	0.155003	0.177066	0.195736	0.214872	0.000112523	0.0743942	0.000129542
L	5	Sample X269			4737	4811	4903	4944	4976	5143	5346	5499	5640	5786						PYGM15	3	0.302391	0.316382	0.333993	0.34192	0.348141	0.381097	0.422305	0.454229	0.484334	0.516224	0.000200781	0.269633	0.000219672
A	6	Sample X6			3635	3710	3753	3816	3886	3915	3973	4054	4095	4144						4ebp1-70-SGS	3	0.110775	0.122896	0.129902	0.140241	0.151836	0.156673	0.166405	0.18013	0.187137	0.195564	7.81443e-05	0.107269	5.1327e-05
B	6	Sample X30			3382	3332	3365	3390	3368	3286	3303	3364	3429	3482						4ebp1-70-SGS	3	0.0707873	0.063045	0.0681491	0.0720309	0.0686142	0.0559677	0.0585781	0.0679941	0.0781127	0.0864291	9.72069e-06	0.0631384	2.61708e-05
C	6	Sample X54			4082	4004	4088	4074	4061	4054	4053	4109	4167	4196						4ebp1-70-SGS	3	0.18491	0.171639	0.185937	0.183543	0.181323	0.18013	0.179959	0.189538	0.19954	0.204571	1.91067e-05	0.174645	2.13742e-05
D	6	Sample X78			3673	3644	3706	3721	3707	3666	3691	3751	3824	3875						L5A-PDZ	3	0.1169	0.112223	0.122246	0.124684	0.122408	0.11577	0.119813	0.129575	0.141561	0.150007	2.61978e-05	0.1098	1.7617e-05
E	6	Sample X102			3769	3843	3893	3922	3932	3911	3935	4004	4076	4159						L5A-PDZ	3	0.132519	0.1447	0.153002	0.157843	0.159517	0.156005	0.16002	0.171639	0.183884	0.198155	4.85465e-05	0.132601	4.76308e-05
F	6	Sample X126			4007	4010	4083	4113	4122	4112	4108	4128	4198	4292						L5A-PDZ	3	0.172147	0.172655	0.185082	0.190226	0.191773	0.190054	0.189367	0.192806	0.204919	0.221377	3.55171e-05	0.16973	4.78124e-05
G	6	Sample X150			3764	3810	3814	3817	3797	3762	3844	3930	4022	4104						L5A-SGS	3	0.1317	0.139253	0.139912	0.140406	0.137114	0.131373	0.144866	0.159182	0.174689	0.18868	4.36799e-05	0.12251	4.37029e-05
H	6	Sample X174			3403	3474	3487	3471	3498	3585	3677	3763	3825	3906						L5A-SGS	3	0.0740546	0.0851699	0.0872167	0.0846981	0.0889514	0.102763	0.117547	0.131537	0.141726	0.15517	7.37316e-05	0.0626443	6.73624e-05
I	6	Sample X198			3690	3729	3758	3693	3635	3730	3859	3936	4043	4124						L5A-SGS	3	0.119651	0.125986	0.130719	0.120137	0.110775	0.126149	0.147351	0.160188	0.178257	0.192117	6.37597e-05	0.102877	6.41865e-05
J	6	Sample X222			12588	12548	12628	12675	12691	12782	12799	12847	12908	12963						PO4-std	3	3.81929	3.77691	3.86228	3.91358	3.93124	4.03364	4.05315	4.10889	4.18116	4.24776	0.000426265	3.73703	0.000420116
K	6	Sample X246			12683	12572	12537	12553	12532	12544	12546	12621	12600	12649						PO4-std	3	3.9224	3.80227	3.76536	3.78217	3.76012	3.7727	3.7748	3.85472	3.83213	3.8851	1.56862e-05	3.80576	9.47656e-06
L	6	Sample X270			1989	1956	1927	1892	1880	1857	1827	1810	1781	1753						PO4-std	3	-0.127119	-0.131397	-0.135143	-0.139646	-0.141185	-0.14413	-0.147958	-0.150121	-0.1538	-0.15734	-2.68476e-05	-0.126675	-0.000547873
A	7	Sample X7			5840	5485	5562	5522	5450	5433	5560	5650	5727	5806						IRSp53-PDZ	4	0.528209	0.451276	0.467598	0.459095	0.443922	0.440365	0.467172	0.486495	0.503248	0.520651	2.07544e-05	0.46435	2.46605e-05
B	7	Sample X31			4104	3965	4031	4085	4116	4067	4068	4131	4202	4298						IRSp53-PDZ	4	0.18868	0.165058	0.176217	0.185424	0.190741	0.182347	0.182518	0.193322	0.205615	0.222435	3.31366e-05	0.169354	5.36581e-05
C	7	Sample X55			3629	3533	3621	3668	3689	3678	3691	3770	3858	3931						IRSp53-PDZ	4	0.10981	0.0944881	0.108526	0.116093	0.119489	0.117709	0.119813	0.132683	0.147185	0.15935	4.77221e-05	0.0938813	6.54259e-05
D	7	Sample X79			3629	3619	3679	3726	3684	3663	3724	3798	3859	3922						IRSp53-SGS	4	0.10981	0.108205	0.117871	0.125498	0.11868	0.115285	0.125172	0.137278	0.147351	0.157843	4.03526e-05	0.102088	5.39025e-05
E	7	Sample X103			3639	3625	3656	3690	3676	3616	3644	3734	3809	3869						IRSp53-SGS	4	0.111418	0.109168	0.114156	0.119651	0.117385	0.107724	0.112223	0.126801	0.139088	0.14901	2.92447e-05	0.103116	3.87836e-05
F	7	Sample X127			3636	3681	3731	3760	3722	3709	3814	3857	3942	3978						IRSp53-SGS	4	0.110935	0.118194	0.126312	0.131046	0.124847	0.122733	0.139912	0.147019	0.161194	0.167248	4.72639e-05	0.106586	5.73397e-05
G	7	Sample X151			3527	3586	3655	3712	3730	3652	3782	3902	4046	4170						4ebp1-70-PDZ	4	0.0935371	0.102922	0.113995	0.123221	0.126149	0.113511	0.13465	0.154502	0.178767	0.200059	8.65556e-05	0.0821981	8.67579e-05
H	7	Sample X175			3460	3507	3567	3584	3531	3542	3663	3757	3854	3951						4ebp1-70-PDZ	4	0.0829697	0.0903726	0.0998918	0.102603	0.094171	0.0959161	0.115285	0.130555	0.146522	0.162704	6.58467e-05	0.0725911	7.29482e-05
I	7	Sample X199			3345	3389	3467	3490	3419	3434	3569	3676	3789	3869						4ebp1-70-PDZ	4	0.065053	0.0718754	0.0840693	0.0876895	0.0765502	0.0788947	0.10021	0.117385	0.135799	0.14901	7.11902e-05	0.0539396	0.000100017
J	7	Sample X223			3411	3425	3443	3458	3431	3342	3350	3446	3535	3610						PYGM15	4	0.0753017	0.0774874	0.0803037	0.0826558	0.0784254	0.0645893	0.0658263	0.0807737	0.0948053	0.106762	1.72925e-05	0.0703175	4.05632e-05
K	7	Sample X247			3116	3163	3159	3133	3145	3254	3313	3369	3430	3501						PYGM15	4	0.0301853	0.0372553	0.0366519	0.0327375	0.0345425	0.0510699	0.0601165	0.0687693	0.078269	0.0894249	5.45204e-05	0.01919	7.15394e-05
L	7	Sample X271			4377	4369	4339	4362	4454	4535	4616	4693	4776	4837						PYGM15	4	0.23645	0.235024	0.229689	0.233777	0.250265	0.264965	0.279839	0.294144	0.309746	0.321335	8.8999e-05	0.212124	0.000107891
A	8	Sample X8			3747	3734	3758	3776	3814	3851	3887	3926	3958	3984						4ebp1-70-SGS	4	0.128922	0.126801	0.130719	0.133666	0.139912	0.146025	0.152003	0.158513	0.163881	0.16826	4.10957e-05	0.120213	1.42784e-05
B	8	Sample X32			3243	3245	3336	3386	3306	3165	3220	3243	3266	3296						4ebp1-70-SGS	4	0.0493911	0.0496962	0.0636625	0.071409	0.0590394	0.0375572	0.0458889	0.0493911	0.0529041	0.0575025	-3.73439e-06	0.0558848	1.27158e-05
C	8	Sample X56			3967	3882	3931	3979	3926	3884	3925	3954	3979	3998						4ebp1-70-SGS	4	0.165395	0.151171	0.15935	0.167416	0.158513	0.151503	0.158345	0.163208	0.167416	0.170625	7.36662e-06	0.156874	9.6341e-06
D	8	Sample X80			3671	3650	3694	3704	3631	3584	3660	3718	3768	3828						L5A-PDZ	4	0.116577	0.113189	0.120299	0.121921	0.110132	0.102603	0.114801	0.124196	0.132355	0.142221	1.79572e-05	0.109055	9.37645e-06
E	8	Sample X104			3748	3773	3815	3812	3761	3786	3851	3909	3959	3996						L5A-PDZ	4	0.129085	0.133174	0.140077	0.139582	0.13121	0.135306	0.146025	0.155671	0.164049	0.170286	3.47641e-05	0.123588	3.38485e-05
F	8	Sample X128			3593	3585	3632	3643	3636	3539	3515	3574	3638	3700						L5A-PDZ	4	0.104041	0.102763	0.110292	0.112062	0.110935	0.0954399	0.0916374	0.101007	0.111257	0.121272	4.61361e-06	0.103303	1.69088e-05
G	8	Sample X152			3496	3514	3507	3487	3434	3420	3480	3550	3602	3662						L5A-SGS	4	0.0886358	0.0914792	0.0903726	0.0872167	0.0788947	0.0767064	0.0861141	0.0971868	0.105481	0.115124	1.84333e-05	0.0806611	1.84563e-05
H	8	Sample X176			3166	3156	3148	3135	3177	3227	3292	3343	3395	3432						L5A-SGS	4	0.0377081	0.0361996	0.0349942	0.0330381	0.0393698	0.0469537	0.0568884	0.0647439	0.0728088	0.0785818	4.30309e-05	0.0243101	3.66616e-05
I	8	Sample X200			3587	3618	3598	3553	3594	3656	3726	3802	3843	3900						L5A-SGS	4	0.103082	0.108045	0.104841	0.0976637	0.104201	0.114156	0.125498	0.137936	0.1447	0.154169	4.92577e-05	0.0898744	4.96845e-05
J	8	Sample X224			9534	9498	9499	9463	9530	9559	9566	9592	9608	9624						PO4-std	4	1.69985	1.68367	1.68412	1.66807	1.69805	1.71117	1.71435	1.72621	1.73354	1.7409	5.45866e-05	1.67324	4.84376e-05
K	8	Sample X248			9732	9690	9710	9716	9740	9761	9792	9799	9835	9875						PO4-std	4	1.79129	1.77154	1.78092	1.78374	1.79507	1.80504	1.81984	1.8232	1.84055	1.86001	7.2282e-05	1.76375	6.60724e-05
L	8	Sample X272			12709	12736	12765	12771	12826	12857	12844	12903	12882	12973						PO4-std	4	3.95123	3.98145	4.01425	4.02108	4.08438	4.12062	4.10537	4.17518	4.15016	4.26001	0.000255238	3.93323	-0.000265787
A	9	Sample X9			5516	5250	5328	5316	5293	5350	5396	5451	5533	5559						IRSp53-PDZ	5	0.457824	0.402658	0.418599	0.416134	0.411422	0.42313	0.432654	0.444132	0.461428	0.466958	3.44715e-05	0.412811	3.83776e-05
B	9	Sample X33			3816	3667	3706	3759	3749	3698	3709	3744	3782	3834						IRSp53-PDZ	5	0.140241	0.115931	0.122246	0.130882	0.129248	0.120948	0.122733	0.128432	0.13465	0.143212	7.87628e-06	0.124127	2.83978e-05
C	9	Sample X57			3413	3420	3475	3520	3489	3414	3482	3534	3587	3654						IRSp53-PDZ	5	0.0756137	0.0767064	0.0853272	0.0924285	0.0875319	0.0757698	0.0864291	0.0946467	0.103082	0.113834	2.75478e-05	0.0726082	4.52516e-05
D	9	Sample X81			3583	3532	3595	3622	3547	3446	3498	3567	3602	3645						IRSp53-SGS	5	0.102443	0.0943295	0.104361	0.108686	0.0967101	0.0807737	0.0889514	0.0998918	0.105481	0.112384	3.53707e-06	0.0972789	1.7087e-05
E	9	Sample X105			3779	3743	3775	3782	3709	3597	3610	3685	3737	3792						IRSp53-SGS	5	0.134158	0.128269	0.133502	0.13465	0.122733	0.104681	0.106762	0.118842	0.12729	0.136292	-8.21545e-06	0.129647	1.32345e-06
F	9	Sample X129			3606	3619	3650	3678	3656	3588	3593	3652	3702	3746						IRSp53-SGS	5	0.106121	0.108205	0.113189	0.117709	0.114156	0.103242	0.104041	0.113511	0.121597	0.128758	1.24834e-05	0.105563	2.25591e-05
G	9	Sample X153			3466	3479	3522	3529	3494	3382	3469	3557	3661	3760						4ebp1-70-PDZ	5	0.0839122	0.0859567	0.0927452	0.093854	0.0883203	0.0707873	0.0843837	0.0982999	0.114963	0.131046	3.07614e-05	0.07597	3.09636e-05
H	9	Sample X177			3591	3596	3634	3609	3556	3593	3648	3697	3763	3788						4ebp1-70-PDZ	5	0.103721	0.104521	0.110614	0.106602	0.0981408	0.104041	0.112867	0.120786	0.131537	0.135635	2.78732e-05	0.0961225	3.49746e-05
I	9	Sample X201			3287	3320	3320	3214	3199	3273	3347	3412	3472	3528						4ebp1-70-PDZ	5	0.0561211	0.0611945	0.0611945	0.044977	0.0427005	0.0539755	0.0653622	0.0754577	0.0848554	0.0936955	3.27042e-05	0.0443309	6.15308e-05
J	9	Sample X225			3195	3185	3212	3184	3073	3036	3117	3179	3225	3268						PYGM15	5	0.0420942	0.0405799	0.0446732	0.0404285	0.0237553	0.0182516	0.0303353	0.0396722	0.0466493	0.0532101	4.12834e-06	0.035488	2.7399e-05
K	9	Sample X249			3003	3067	3057	3008	3010	3074	3129	3159	3197	3225						PYGM15	5	0.0133653	0.022861	0.021372	0.0141043	0.0144001	0.0239044	0.0321365	0.0366519	0.0423973	0.0466493	2.91066e-05	0.00932027	4.61256e-05
L	9	Sample X273			5031	5001	4991	4878	4721	4881	4962	5039	5099	5163						PYGM15	5	0.358903	0.353022	0.351067	0.329184	0.299386	0.32976	0.345416	0.360476	0.372333	0.3851	2.51046e-05	0.333402	4.39962e-05
A	10	Sample X10			3900	3760	3801	3676	3491	3602	3692	3726	3764	3808						4ebp1-70-SGS	5	0.154169	0.131046	0.137771	0.117385	0.0878472	0.105481	0.119975	0.125498	0.1317	0.138923	-8.51473e-06	0.130088	-3.5332e-05
B	10	Sample X34			3250	3224	3348	3453	3459	3063	3057	3150	3172	3178						4ebp1-70-SGS	5	0.0504592	0.0464972	0.0655169	0.0818712	0.0828127	0.0222652	0.021372	0.0352954	0.0386142	0.039521	-2.7615e-05	0.0649915	-1.11648e-05
C	10	Sample X58			4253	4190	4217	4204	4200	4207	4222	4232	4255	4273						4ebp1-70-SGS	5	0.214522	0.203529	0.208228	0.205963	0.205267	0.206485	0.2091	0.210846	0.214872	0.218032	6.8042e-06	0.205602	9.07168e-06
D	10	Sample X82			3362	3324	3412	3384	3258	3253	3284	3344	3375	3409						L5A-PDZ	5	0.0676842	0.061811	0.0754577	0.0710981	0.051681	0.0509172	0.055661	0.0648984	0.0697003	0.0749898	1.06586e-06	0.0637504	-7.51488e-06
E	10	Sample X106			3447	3437	3428	3394	3377	3435	3472	3516	3543	3576						L5A-PDZ	5	0.0809304	0.0793642	0.0779563	0.0726532	0.0700107	0.0790512	0.0848554	0.0917956	0.0960748	0.101326	2.09789e-05	0.0708145	2.00632e-05
F	10	Sample X130			3483	3467	3463	3483	3466	3343	3337	3397	3441	3505						L5A-PDZ	5	0.0865865	0.0840693	0.0834409	0.0865865	0.0839122	0.0647439	0.0638169	0.0731202	0.0799904	0.0900566	-6.889e-06	0.0837657	5.40624e-06
G	10	Sample X154			3596	3594	3553	3478	3423	3481	3525	3571	3631	3649						L5A-SGS	5	0.104521	0.104201	0.0976637	0.0857993	0.0771749	0.0862716	0.0932202	0.100529	0.110132	0.113028	8.27104e-06	0.0922914	8.29411e-06
H	10	Sample X178			3058	3033	2985	2921	2934	2994	3020	3055	3097	3131						L5A-SGS	5	0.0215208	0.0178065	0.010709	0.00131478	0.00321664	0.0120364	0.0158799	0.0210745	0.0273397	0.0324369	1.3602e-05	0.00817232	7.23272e-06
I	10	Sample X202			3405	3482	3399	3249	3255	3301	3351	3411	3464	3497						L5A-SGS	5	0.0743663	0.0864291	0.0734316	0.0503065	0.0512227	0.0582707	0.065981	0.0753017	0.0835979	0.0887936	8.76011e-06	0.065514	9.18688e-06
J	10	Sample X226			5462	5496	5484	5498	5535	5533	5559	5583	5607	5611						PO4-std	5	0.446439	0.453596	0.451066	0.454018	0.461852	0.461428	0.466958	0.472084	0.477228	0.478088	2.99875e-05	0.444283	2.38384e-05
K	10	Sample X250			7308	7291	7319	7294	7273	7312	7310	7361	7368	7376						PO4-std	5	0.899255	0.89439	0.902411	0.895247	0.889255	0.900402	0.899828	0.914519	0.916546	0.918866	2.10618e-05	0.890435	1.48522e-05
L	10	Sample X274			1058	1046	1028	1024	1006	1000	983	982	966	955						PO4-std	5	-0.241526	-0.24292	-0.245007	-0.245471	-0.247553	-0.248246	-0.250206	-0.250322	-0.252163	-0.253428	-1.0772e-05	-0.241221	-0.000531797
A	11	Sample X11			4975	4821	4770	4738	4717	4781	4832	4889	4936	4993						IRSp53-PDZ	6	0.347946	0.318285	0.308611	0.302579	0.298636	0.310692	0.320381	0.331298	0.34037	0.351458	1.84391e-05	0.311962	2.23452e-05
B	11	Sample X35			3593	3446	3457	3424	3363	3406	3438	3528	3569	3626						IRSp53-PDZ	6	0.104041	0.0807737	0.0824988	0.0773312	0.0678391	0.0745221	0.0795207	0.0936955	0.10021	0.109329	1.27717e-05	0.0793131	3.32932e-05
C	11	Sample X59			3251	3149	3173	3165	3124	3147	3200	3259	3289	3324						IRSp53-PDZ	6	0.0506118	0.0351448	0.0387653	0.0375572	0.0313856	0.0348436	0.0428521	0.0518338	0.0564279	0.061811	1.68919e-05	0.0339882	3.45957e-05
D	11	Sample X83			3423	3421	3458	3443	3429	3427	3456	3506	3528	3544						IRSp53-SGS	6	0.0771749	0.0768625	0.0826558	0.0803037	0.0781127	0.0778	0.0823419	0.0902146	0.0936955	0.0962336	1.68159e-05	0.07345	3.03658e-05
E	11	Sample X107			3594	3552	3532	3488	3489	3536	3586	3653	3672	3702						IRSp53-SGS	6	0.104201	0.0975048	0.0943295	0.0873743	0.0875319	0.0949639	0.102922	0.113672	0.116739	0.121597	2.23229e-05	0.0886899	3.18618e-05
F	11	Sample X131			3564	3579	3588	3565	3539	3492	3537	3599	3629	3651						IRSp53-SGS	6	0.099414	0.101805	0.103242	0.0995733	0.0954399	0.0880049	0.0951225	0.105001	0.10981	0.11335	8.55898e-06	0.0959409	1.86347e-05
G	11	Sample X155			3384	3455	3489	3443	3313	3274	3335	3405	3460	3504						4ebp1-70-PDZ	6	0.0710981	0.082185	0.0875319	0.0803037	0.0601165	0.0541286	0.0635081	0.0743663	0.0829697	0.0898987	2.6513e-06	0.0730199	2.85356e-06
H	11	Sample X179			3330	3354	3364	3338	3296	3249	3259	3300	3331	3370						4ebp1-70-PDZ	6	0.0627364	0.0664452	0.0679941	0.0639713	0.0575025	0.0503065	0.0518338	0.058117	0.0628907	0.0689244	-3.14056e-06	0.0629565	3.96088e-06
I	11	Sample X203			3170	3236	3250	3206	3147	3104	3128	3194	3242	3271						4ebp1-70-PDZ	6	0.0383121	0.0483241	0.0504592	0.0437623	0.0348436	0.0283872	0.0319863	0.0419427	0.0492387	0.0536693	3.0429e-06	0.0402668	3.18695e-05
J	11	Sample X227			3051	3081	3061	3055	3023	2959	2943	3007	3047	3092						PYGM15	6	0.0204796	0.0249488	0.0219674	0.0210745	0.0163242	0.00688314	0.0045352	0.0139565	0.019885	0.026592	-4.0176e-06	0.0200752	1.92531e-05
K	11	Sample X251			2979	2966	2945	2901	2813	2853	2901	2958	2981	3011						PYGM15	6	0.00982497	0.00791191	0.00482843	-0.00160487	-0.0143616	-0.00858112	-0.00160487	0.00673625	0.0101196	0.0145479	3.70101e-06	0.000561059	2.072e-05
L	11	Sample X275			5244	5225	5132	4992	5051	5149	5188	5255	5301	5313						PYGM15	6	0.401439	0.397588	0.378901	0.351262	0.362839	0.382297	0.390122	0.403674	0.413059	0.415518	2.49954e-05	0.374673	4.3887e-05
A	12	Sample X12			3855	3812	3861	3817	3645	3671	3700	3739	3767	3789						4ebp1-70-SGS	6	0.146687	0.139582	0.147682	0.140406	0.112384	0.116577	0.121272	0.127616	0.132192	0.135799	-1.53166e-05	0.14121	-4.21339e-05
B	12	Sample X36			3188	3135	3201	3268	3270	3092	3057	3122	3129	3150						4ebp1-70-SGS	6	0.041034	0.0330381	0.0430038	0.0532101	0.0535162	0.026592	0.021372	0.0310854	0.0321365	0.0352954	-1.21206e-05	0.0443007	4.32952e-06
C	12	Sample X60			4092	3916	3945	3919	3876	3835	3856	3888	3912	3934						4ebp1-70-SGS	6	0.186622	0.15684	0.161697	0.157342	0.150173	0.143377	0.146853	0.152169	0.156172	0.159852	-1.67429e-05	0.167156	-1.44754e-05
D	12	Sample X84			3177	3188	3191	3160	3109	3092	3134	3183	3192	3216						L5A-PDZ	6	0.0393698	0.041034	0.0414882	0.0368028	0.0291361	0.026592	0.0328878	0.0402772	0.0416397	0.0452809	1.87353e-06	0.0363267	-6.70721e-06
E	12	Sample X108			3463	3461	3422	3447	3471	3507	3546	3560	3588	3602						L5A-PDZ	6	0.0834409	0.0831268	0.0770187	0.0809304	0.0846981	0.0903726	0.0965513	0.0987773	0.103242	0.105481	2.52775e-05	0.0751974	2.43618e-05
F	12	Sample X132			3464	3420	3414	3379	3255	3196	3254	3311	3363	3397						L5A-PDZ	6	0.0835979	0.0767064	0.0757698	0.0703213	0.0512227	0.0422458	0.0510699	0.0598087	0.0678391	0.0731202	-1.52983e-05	0.0743492	-3.00311e-06
G	12	Sample X156			3247	3238	3176	3152	3209	3256	3285	3292	3335	3341						L5A-SGS	6	0.0500013	0.0486289	0.0392187	0.0355967	0.0442177	0.0513754	0.0558143	0.0568884	0.0635081	0.0644348	1.97078e-05	0.0391437	1.97309e-05
H	12	Sample X180			2902	2931	2938	2921	2945	2973	2981	3006	3019	3057						L5A-SGS	6	-0.00145907	0.00277747	0.00380248	0.00131478	0.00482843	0.00894161	0.0101196	0.0138087	0.0157318	0.021372	1.90262e-05	-0.00329194	1.26569e-05
I	12	Sample X204			3207	3257	3235	3172	3187	3220	3247	3292	3296	3326						L5A-SGS	6	0.0439141	0.0515282	0.0481718	0.0386142	0.0408826	0.0458889	0.0500013	0.0568884	0.0575025	0.0621194	1.45666e-05	0.0408112	1.49934e-05
J	12	Sample X228			5560	5520	5538	5547	5586	5599	5609	5605	5639	5642						PO4-std	6	0.467172	0.458671	0.46249	0.464403	0.472726	0.475511	0.477658	0.476799	0.484119	0.484766	2.27569e-05	0.458777	1.66079e-05
K	12	Sample X252			5294	5284	5266	5287	5296	5283	5304	5312	5338	5324						PO4-std	6	0.411627	0.409583	0.405912	0.410196	0.412036	0.409379	0.413674	0.415313	0.420657	0.417777	9.47742e-06	0.406929	3.26782e-06
L	12	Sample X276			4742	4830	4865	4916	4974	5077	5107	5015	4988	4954						PO4-std	6	0.303331	0.32	0.32669	0.336501	0.347751	0.367973	0.373922	0.355763	0.350481	0.343861	4.32316e-05	0.316688	-0.000477794
A	13	Sample X13			5036	4862	4916	4959	4999	5006	4967	5021	5056	5066						IRSp53-PDZ	7	0.359886	0.326115	0.336501	0.344832	0.35263	0.354	0.346388	0.35694	0.363824	0.365798	2.14851e-05	0.337801	2.53912e-05
B	13	Sample X37			3762	3576	3587	3606	3542	3452	3465	3509	3546	3573						IRSp53-PDZ	7	0.131373	0.101326	0.103082	0.106121	0.0959161	0.0817144	0.083755	0.0906887	0.0965513	0.100848	-2.2799e-05	0.112817	-2.2775e-06
C	13	Sample X61			3478	3416	3416	3411	3410	3372	3378	3416	3433	3460						IRSp53-PDZ	7	0.0857993	0.0760819	0.0760819	0.0753017	0.0751458	0.0692347	0.070166	0.0760819	0.0787383	0.0829697	-1.42373e-06	0.0774144	1.628e-05
D	13	Sample X85			3277	3231	3257	3221	3220	3242	3259	3293	3313	3324						IRSp53-SGS	7	0.0545881	0.0475625	0.0515282	0.0460409	0.0458889	0.0492387	0.0518338	0.0570419	0.0601165	0.061811	1.01606e-05	0.0464687	2.37105e-05
E	13	Sample X109			3723	3634	3637	3610	3547	3592	3613	3635	3673	3695						IRSp53-SGS	7	0.125009	0.110614	0.111096	0.106762	0.0967101	0.103881	0.107243	0.110775	0.1169	0.120462	5.091e-07	0.11064	1.0048e-05
F	13	Sample X133			3721	3684	3699	3685	3609	3570	3610	3656	3678	3707						IRSp53-SGS	7	0.124684	0.11868	0.12111	0.118842	0.106602	0.10037	0.106762	0.114156	0.117709	0.122408	-5.27861e-06	0.118299	4.7971e-06
G	13	Sample X157			3377	3363	3371	3370	3265	3207	3267	3316	3359	3408						4ebp1-70-PDZ	7	0.0700107	0.0678391	0.0690795	0.0689244	0.0527512	0.0439141	0.0530571	0.0605784	0.0672194	0.0748339	-3.02395e-06	0.0646352	-2.82169e-06
H	13	Sample X181			3313	3312	3330	3350	3260	3160	3183	3236	3244	3280						4ebp1-70-PDZ	7	0.0601165	0.0599626	0.0627364	0.0658263	0.0519867	0.0368028	0.0402772	0.0483241	0.0495437	0.0550478	-1.42648e-05	0.0616213	-7.16335e-06
I	13	Sample X205			3252	3263	3270	3218	3054	3039	3079	3121	3177	3203						4ebp1-70-PDZ	7	0.0507645	0.0524453	0.0535162	0.0455849	0.0209257	0.0186968	0.0246503	0.0309354	0.0393698	0.0433071	-1.69991e-05	0.0482191	1.18276e-05
J	13	Sample X229			2963	2966	2970	2936	2837	2845	2871	2908	2929	2948						PYGM15	7	0.00747089	0.00791191	0.0085002	0.00350952	-0.0108969	-0.00973961	-0.00597012	-0.000583854	0.00248478	0.00526841	-6.59162e-06	0.0047505	1.6679e-05
K	13	Sample X253			3063	3060	3023	2994	2962	2871	2898	2936	3075	3123						PYGM15	7	0.0222652	0.0218185	0.0163242	0.0120364	0.00732393	-0.00597012	-0.00204216	0.00350952	0.0240536	0.0312355	-1.17295e-06	0.0137592	1.58461e-05
L	13	Sample X277			4277	4235	4206	4121	3995	4039	4117	4173	4204	4227						PYGM15	7	0.218736	0.211371	0.206311	0.191601	0.170117	0.177576	0.190913	0.200579	0.205963	0.209973	-7.06988e-06	0.202556	1.18217e-05
A	14	Sample X14			3720	3785	3817	3648	3505	3595	3649	3678	3699	3727						4ebp1-70-SGS	7	0.124521	0.135142	0.140406	0.112867	0.0900566	0.104361	0.113028	0.117709	0.12111	0.125661	-9.42784e-06	0.124143	-3.62451e-05
B	14	Sample X38			3140	3084	3146	3195	3006	2932	2998	3019	3043	3063						4ebp1-70-SGS	7	0.0337901	0.0253967	0.034693	0.0420942	0.0138087	0.00292384	0.0126269	0.0157318	0.0192908	0.0222652	-1.71999e-05	0.0325821	-7.49779e-07
C	14	Sample X62			3976	3878	3954	3940	3767	3755	3804	3826	3859	3876						4ebp1-70-SGS	7	0.166911	0.150505	0.163208	0.160858	0.132192	0.130228	0.138265	0.141891	0.147351	0.150173	-1.7629e-05	0.158736	-1.53615e-05
D	14	Sample X86			3157	3073	3060	3091	3074	3080	3091	3107	3129	3140						L5A-PDZ	7	0.0363503	0.0237553	0.0218185	0.0264425	0.0239044	0.0247996	0.0264425	0.0288365	0.0321365	0.0337901	3.61669e-06	0.0256576	-4.96405e-06
E	14	Sample X110			3601	3551	3533	3579	3571	3554	3566	3567	3606	3626						L5A-PDZ	7	0.105321	0.0973458	0.0944881	0.101805	0.100529	0.0978228	0.0997326	0.0998918	0.106121	0.109329	5.83803e-06	0.0977357	4.92235e-06
F	14	Sample X134			3400	3381	3415	3401	3272	3201	3256	3263	3326	3345						L5A-PDZ	7	0.0735873	0.070632	0.0759258	0.0737431	0.0538224	0.0430038	0.0513754	0.0524453	0.0621194	0.065053	-1.67536e-05	0.0722229	-4.45832e-06
G	14	Sample X158			3352	3380	3349	3192	3164	3174	3217	3259	3280	3288						L5A-SGS	7	0.0661357	0.0704766	0.0656716	0.0416397	0.0374063	0.0389164	0.0454329	0.0518338	0.0550478	0.0562745	-1.27804e-05	0.0605518	-1.27573e-05
H	14	Sample X182			3038	3014	3024	3008	3018	3035	3049	3076	3073	3107						L5A-SGS	7	0.0185484	0.0149917	0.0164723	0.0141043	0.0155837	0.0181032	0.0201823	0.0242027	0.0237553	0.0288365	1.07749e-05	0.0130131	4.40565e-06
I	14	Sample X206			3352	3322	3252	3159	3169	3207	3274	3299	3335	3350						L5A-SGS	7	0.0661357	0.0615027	0.0507645	0.0366519	0.0381611	0.0439141	0.0541286	0.0579634	0.0635081	0.0658263	5.32473e-06	0.0506608	5.75151e-06
J	14	Sample X230			4461	4445	4439	4412	4447	4462	4478	4469	4493	4518						PO4-std	7	0.251529	0.248643	0.247562	0.242711	0.249003	0.251709	0.254603	0.252974	0.257321	0.261866	1.10721e-05	0.245149	4.9231e-06
K	14	Sample X254			4378	4342	4320	4366	4335	4358	4363	4354	4358	4369						PO4-std	7	0.236629	0.230221	0.226322	0.234489	0.228979	0.233065	0.233955	0.232353	0.233065	0.235024	1.92432e-06	0.231256	-4.28528e-06
L	14	Sample X278			5464	5508	5484	5472	5477	5448	5451	5458	5470	5478						PO4-std	7	0.446859	0.456131	0.451066	0.44854	0.449592	0.443503	0.444132	0.4456	0.44812	0.449802	-3.85019e-06	0.450645	-0.000524876
A	15	Sample X15			5341	5244	5378	5387	5178	4799	4902	5055	5108	5161						IRSp53-PDZ	8	0.421275	0.401439	0.428919	0.430786	0.388111	0.314103	0.333801	0.363627	0.374121	0.3847	-6.12034e-05	0.42081	-5.72973e-05
B	15	Sample X39			3491	3425	3432	3507	3474	3288	3303	3343	3353	3393						IRSp53-PDZ	8	0.0878472	0.0774874	0.0785818	0.0903726	0.0851699	0.0562745	0.0585781	0.0647439	0.0662904	0.0724976	-2.07068e-05	0.0862084	-1.85246e-07
C	15	Sample X63			3289	3170	3193	3235	3171	3091	3136	3167	3205	3217						IRSp53-PDZ	8	0.0564279	0.0383121	0.0417912	0.0481718	0.0384631	0.0264425	0.0331885	0.0378591	0.0436106	0.0454329	-6.99481e-06	0.0451668	1.0709e-05
D	15	Sample X87			3640	3572	3580	3579	3560	3550	3580	3603	3629	3635						IRSp53-SGS	8	0.111579	0.100689	0.101965	0.101805	0.0987773	0.0971868	0.101965	0.105641	0.10981	0.110775	3.7315e-06	0.10178	1.72814e-05
E	15	Sample X111			3478	3423	3440	3391	3298	3282	3312	3337	3375	3392						IRSp53-SGS	8	0.0857993	0.0771749	0.0798338	0.0721865	0.0578098	0.0553543	0.0599626	0.0638169	0.0697003	0.072342	-1.47803e-05	0.0782662	-5.24142e-06
F	15	Sample X135			3663	3617	3593	3581	3560	3502	3518	3559	3591	3606						IRSp53-SGS	8	0.115285	0.107884	0.104041	0.102124	0.0987773	0.0895828	0.092112	0.0986181	0.103721	0.106121	-8.98801e-06	0.10722	1.0877e-06
G	15	Sample X159			3306	3338	3325	3343	3293	3148	3123	3176	3229	3267						4ebp1-70-PDZ	8	0.0590394	0.0639713	0.0619652	0.0647439	0.0570419	0.0349942	0.0312355	0.0392187	0.0472581	0.0530571	-2.05626e-05	0.0635901	-2.03603e-05
H	15	Sample X183			3302	3280	3302	3308	3306	3203	3163	3173	3199	3235						4ebp1-70-PDZ	8	0.0584244	0.0550478	0.0584244	0.0593471	0.0590394	0.0433071	0.0372553	0.0387653	0.0427005	0.0481718	-1.81317e-05	0.0609273	-1.10303e-05
I	15	Sample X207			3287	3278	3277	3312	3260	3116	3125	3145	3172	3185						4ebp1-70-PDZ	8	0.0561211	0.0547413	0.0545881	0.0599626	0.0519867	0.0301853	0.0315358	0.0345425	0.0386142	0.0405799	-2.32359e-05	0.0592273	5.59077e-06
J	15	Sample X231			2964	2952	2945	2906	2843	2751	2782	2812	2843	2860						PYGM15	8	0.00761788	0.00585531	0.00482843	-0.000875667	-0.010029	-0.0232624	-0.0188209	-0.0145057	-0.010029	-0.00756646	-2.07873e-05	0.00579364	2.48334e-06
K	15	Sample X255			2950	2963	2966	2968	2904	2862	2827	2831	2862	2888						PYGM15	8	0.00556182	0.00747089	0.00791191	0.00820601	-0.0011674	-0.00727639	-0.0123418	-0.0117641	-0.00727639	-0.00349857	-1.77226e-05	0.00921614	-7.0355e-07
L	15	Sample X279			3933	3949	3973	3900	3761	3758	3798	3836	3868	3899						PYGM15	8	0.159685	0.162368	0.166405	0.154169	0.13121	0.130719	0.137278	0.143543	0.148844	0.154002	-1.57219e-05	0.158255	3.16971e-06
A	16	Sample X16			3536	3528	3580	3432	3378	3428	3463	3484	3489	3501						4ebp1-70-SGS	8	0.0949639	0.0936955	0.101965	0.0785818	0.070166	0.0779563	0.0834409	0.086744	0.0875319	0.0894249	-7.41067e-06	0.0908934	-3.42279e-05
B	16	Sample X40			3104	3029	3008	3008	3012	2979	2971	2987	3020	3026						4ebp1-70-SGS	8	0.0283872	0.0172133	0.0141043	0.0141043	0.0146959	0.00982497	0.00864732	0.0110039	0.0158799	0.0167687	-7.60837e-06	0.019628	8.84179e-06
C	16	Sample X64			3910	3815	3798	3814	3795	3802	3844	3851	3868	3856						4ebp1-70-SGS	8	0.155838	0.140077	0.137278	0.139912	0.136785	0.137936	0.144866	0.146025	0.148844	0.146853	2.03328e-06	0.142221	4.30075e-06
D	16	Sample X88			3027	3040	3145	3131	2980	2978	3031	3059	3087	3076						L5A-PDZ	8	0.0169169	0.0188453	0.0345425	0.0324369	0.00997227	0.0096777	0.0175099	0.0216697	0.0258448	0.0242027	2.59072e-07	0.0210064	-8.32167e-06
E	16	Sample X112			3552	3469	3491	3484	3453	3477	3492	3511	3525	3537						L5A-PDZ	8	0.0975048	0.0843837	0.0878472	0.086744	0.0818712	0.0856419	0.0880049	0.0910048	0.0932202	0.0951225	3.22006e-06	0.0872025	2.30438e-06
F	16	Sample X136			3358	3346	3349	3358	3289	3190	3222	3256	3271	3304						L5A-PDZ	8	0.0670645	0.0652076	0.0656716	0.0670645	0.0564279	0.0413368	0.046193	0.0513754	0.0536693	0.0587319	-1.54014e-05	0.0665151	-3.1062e-06
G	16	Sample X160			3305	3256	3175	3131	3138	3165	3202	3200	3230	3237						L5A-SGS	8	0.0588857	0.0513754	0.0390675	0.0324369	0.0334892	0.0375572	0.0431554	0.0428521	0.0474103	0.0484765	-3.34808e-06	0.0454795	-3.32501e-06
H	16	Sample X184			3239	3216	3217	3222	3208	3231	3243	3249	3248	3286						L5A-SGS	8	0.0487813	0.0452809	0.0454329	0.046193	0.0440659	0.0475625	0.0493911	0.0503065	0.0501539	0.0559677	6.88123e-06	0.0441848	5.11965e-07
I	16	Sample X208			3302	3264	3245	3211	3185	3215	3231	3240	3263	3277						L5A-SGS	8	0.0584244	0.0525982	0.0496962	0.0445214	0.0405799	0.0451289	0.0475625	0.0489337	0.0524453	0.0545881	-1.29986e-06	0.0502278	-8.73085e-07
J	16	Sample X232			3642	3619	3609	3633	3619	3622	3624	3631	3629	3648						PO4-std	8	0.111901	0.108205	0.106602	0.110453	0.108205	0.108686	0.109007	0.110132	0.10981	0.112867	1.70337e-06	0.108565	-4.44566e-06
K	16	Sample X256			3780	3778	3774	3781	3767	3772	3777	3790	3787	3806						PO4-std	8	0.134322	0.133994	0.133338	0.134486	0.132192	0.13301	0.13383	0.135963	0.135471	0.138594	3.06882e-06	0.132679	-3.14077e-06
L	16	Sample X280			502	504	4765	4797	4814	4833	4868	4877	4953	4989						PO4-std	8	-0.304133	-0.303914	0.307667	0.313724	0.316953	0.320572	0.327265	0.328992	0.343667	0.350677	0.000534203	-0.120375	1.31776e-05
A	17	Sample X17			5430	5326	5416	5567	5634	5220	4895	5037	5101	5147						IRSp53-PDZ	9	0.439738	0.418188	0.436817	0.468665	0.48304	0.396577	0.332452	0.360082	0.37273	0.381897	-8.67447e-05	0.461065	-8.28386e-05
B	17	Sample X41			4037	3824	3817	3881	3861	3694	3676	3701	3723	3737						IRSp53-PDZ	9	0.177236	0.141561	0.140406	0.151004	0.147682	0.120299	0.117385	0.121435	0.125009	0.12729	-3.98219e-05	0.160824	-1.93004e-05
C	17	Sample X65			3317	3236	3259	3268	3202	3057	3086	3121	3153	3165						IRSp53-PDZ	9	0.0607324	0.0483241	0.0518338	0.0532101	0.0431554	0.021372	0.0256954	0.0309354	0.0357474	0.0375572	-2.5527e-05	0.0561725	-7.82318e-06
D	17	Sample X89			3615	3595	3610	3660	3645	3558	3537	3561	3584	3581						IRSp53-SGS	9	0.107563	0.104361	0.106762	0.114801	0.112384	0.098459	0.0951225	0.0989364	0.102603	0.102124	-8.75477e-06	0.109564	4.79511e-06
E	17	Sample X113			3621	3577	3588	3634	3566	3456	3471	3514	3529	3562						IRSp53-SGS	9	0.108526	0.101486	0.103242	0.110614	0.0997326	0.0823419	0.0846981	0.0914792	0.093854	0.0990956	-1.476e-05	0.106363	-5.22109e-06
F	17	Sample X137			3486	3455	3431	3418	3408	3354	3343	3364	3373	3407						IRSp53-SGS	9	0.0870591	0.082185	0.0784254	0.0763941	0.0748339	0.0664452	0.0647439	0.0679941	0.0693899	0.074678	-1.49743e-05	0.0831995	-4.89862e-06
G	17	Sample X161			3364	3363	3350	3345	3305	3189	3138	3182	3218	3243						4ebp1-70-PDZ	9	0.0679941	0.0678391	0.0658263	0.065053	0.0588857	0.0411854	0.0334892	0.0401259	0.0455849	0.0493911	-2.84899e-05	0.0706314	-2.82876e-05
H	17	Sample X185			3340	3333	3319	3330	3322	3225	3202	3209	3246	3255						4ebp1-70-PDZ	9	0.0642803	0.0631993	0.0610405	0.0627364	0.0615027	0.0466493	0.0431554	0.0442177	0.0498488	0.0512227	-1.86203e-05	0.0659575	-1.15189e-05
I	17	Sample X209			3222	3230	3220	3210	3131	3035	3075	3073	3095	3134						4ebp1-70-PDZ	9	0.046193	0.0474103	0.0458889	0.0443695	0.0324369	0.0181032	0.0240536	0.0237553	0.0270405	0.0328878	-2.26406e-05	0.0477983	6.18602e-06
J	17	Sample X233			2904	2892	2902	2888	2841	2757	2756	2763	2796	2819						PYGM15	9	-0.0011674	-0.00291623	-0.00145907	-0.00349857	-0.0103184	-0.0224041	-0.0225472	-0.0215452	-0.0168092	-0.0134964	-1.90845e-05	-0.00016545	4.18612e-06
K	17	Sample X257			2862	2866	2868	2871	2823	2785	2789	2796	2812	2815						PYGM15	9	-0.00727639	-0.00669601	-0.00640571	-0.00597012	-0.0129193	-0.0183901	-0.0178155	-0.0168092	-0.0145057	-0.0140733	-1.05487e-05	-0.00575691	6.47033e-06
L	17	Sample X281			3869	3863	3860	3820	3710	3681	3693	3728	3787	3802						PYGM15	9	0.14901	0.148014	0.147516	0.140901	0.122896	0.118194	0.120137	0.125823	0.135471	0.137936	-1.83297e-05	0.145588	5.61913e-07
A	18	Sample X18			3705	3748	3784	3572	3570	3618	3636	3701	3693	3735						4ebp1-70-SGS	9	0.122084	0.129085	0.134978	0.100689	0.10037	0.108045	0.110935	0.121435	0.120137	0.126964	-2.42496e-06	0.118927	-2.92422e-05
B	18	Sample X42			3078	3106	3159	3225	3068	2882	2961	2995	3023	3037						4ebp1-70-SGS	9	0.0245011	0.0286867	0.0366519	0.0466493	0.02301	-0.00437151	0.00717698	0.012184	0.0163242	0.0184	-2.06862e-05	0.033333	-4.23602e-06
C	18	Sample X66			3940	3862	3882	3792	3736	3746	3775	3796	3803	3819						4ebp1-70-SGS	9	0.160858	0.147848	0.151171	0.136292	0.127127	0.128758	0.133502	0.136949	0.1381	0.140736	-1.65242e-05	0.150049	-1.42567e-05
D	18	Sample X90			3080	3011	3007	3033	2993	2987	2989	3029	3019	3070						L5A-PDZ	9	0.0247996	0.0145479	0.0139565	0.0178065	0.0118888	0.0110039	0.0112988	0.0172133	0.0157318	0.0233081	-4.67709e-07	0.0164361	-9.04845e-06
E	18	Sample X114			3436	3465	3378	3348	3360	3382	3396	3420	3432	3445						L5A-PDZ	9	0.0792077	0.083755	0.070166	0.0655169	0.0673743	0.0707873	0.0729645	0.0767064	0.0785818	0.080617	1.7641e-06	0.0735092	8.48419e-07
F	18	Sample X138			3320	3299	3303	3304	3245	3168	3180	3215	3216	3236						L5A-PDZ	9	0.0611945	0.0579634	0.0585781	0.0587319	0.0496962	0.0380101	0.0398234	0.0451289	0.0452809	0.0483241	-1.71853e-05	0.0605843	-4.89006e-06
G	18	Sample X162			3287	3300	3297	3170	3115	3122	3155	3177	3202	3215						L5A-SGS	9	0.0561211	0.058117	0.0576561	0.0383121	0.0300354	0.0310854	0.0360488	0.0393698	0.0431554	0.0451289	-1.51935e-05	0.0526191	-1.51705e-05
H	18	Sample X186			3265	3227	3230	3234	3218	3216	3221	3240	3253	3259						L5A-SGS	9	0.0527512	0.0469537	0.0474103	0.0480194	0.0455849	0.0452809	0.0460409	0.0489337	0.0509172	0.0518338	1.05386e-06	0.0477403	-5.3154e-06
I	18	Sample X210			3111	3149	3120	3092	2995	2986	3009	3020	3036	3049						L5A-SGS	9	0.0294358	0.0351448	0.0307853	0.026592	0.012184	0.0108564	0.0142522	0.0158799	0.0182516	0.0201823	-1.58792e-05	0.0308839	-1.54524e-05
J	18	Sample X234			2611	2609	2607	2606	2621	2615	2633	2629	2638	2649						PO4-std	9	-0.0431016	-0.0433825	-0.0436632	-0.0438036	-0.0416963	-0.0425397	-0.0400075	-0.0405708	-0.0393031	-0.0377518	5.1874e-06	-0.0446945	-9.61626e-07
K	18	Sample X258			3371	3370	3359	3356	3347	3344	3352	3344	3360	3369						PO4-std	9	0.0690795	0.0689244	0.0672194	0.0667548	0.0653622	0.0648984	0.0661357	0.0648984	0.0673743	0.0687693	-1.39238e-06	0.0677771	-7.60197e-06
L	18	Sample X282			464	453	447	435	445	3166	4281	4327	4339	4335						PO4-std	9	-0.308269	-0.309463	-0.310113	-0.311413	-0.31033	0.0377081	0.219439	0.227561	0.229689	0.228979	0.000668599	-0.461781	0.000147574
A	19	Sample X19			4820	4781	4766	4649	4479	4535	4595	4667	4705	4723						IRSp53-PDZ	10	0.318095	0.310692	0.307856	0.28595	0.254784	0.264965	0.275966	0.289296	0.296388	0.299761	-1.90758e-05	0.301821	-1.51697e-05
B	19	Sample X43			3790	3632	3659	3734	3628	3542	3554	3593	3621	3633						IRSp53-PDZ	10	0.135963	0.110292	0.11464	0.126801	0.10965	0.0959161	0.0978228	0.104041	0.108526	0.110453	-1.99808e-05	0.123399	5.40741e-07
C	19	Sample X67			3242	3212	3251	3219	3138	3099	3092	3121	3150	3169						IRSp53-PDZ	10	0.0492387	0.0446732	0.0506118	0.0457369	0.0334892	0.0276389	0.026592	0.0309354	0.0352954	0.0381611	-1.65157e-05	0.0481467	1.1881e-06
D	19	Sample X91			3187	3157	3179	3190	3138	3159	3209	3230	3250	3257						IRSp53-SGS	10	0.0408826	0.0363503	0.0396722	0.0413368	0.0334892	0.0366519	0.0442177	0.0474103	0.0504592	0.0515282	1.23772e-05	0.0347735	2.59271e-05
E	19	Sample X115			3820	3770	3793	3773	3740	3660	3626	3644	3676	3692						IRSp53-SGS	10	0.140901	0.132683	0.136456	0.133174	0.127779	0.114801	0.109329	0.112223	0.117385	0.119975	-2.53078e-05	0.139655	-1.57689e-05
F	19	Sample X139			3314	3338	3332	3344	3322	3242	3240	3270	3287	3315						IRSp53-SGS	10	0.0602704	0.0639713	0.063045	0.0648984	0.0615027	0.0492387	0.0489337	0.0535162	0.0561211	0.0604244	-8.14991e-06	0.0630821	1.9258e-06
G	19	Sample X163			3164	3146	3141	3123	3037	3014	3036	3076	3104	3115						4ebp1-70-PDZ	10	0.0374063	0.034693	0.0339405	0.0312355	0.0184	0.0149917	0.0182516	0.0242027	0.0283872	0.0300354	-1.01782e-05	0.0332613	-9.97589e-06
H	19	Sample X187			3289	3286	3298	3316	3239	3121	3158	3167	3185	3222						4ebp1-70-PDZ	10	0.0564279	0.0559677	0.0578098	0.0605784	0.0487813	0.0309354	0.0365011	0.0378591	0.0405799	0.046193	-1.96798e-05	0.0589712	-1.25784e-05
I	19	Sample X211			3111	3135	3131	3072	2946	2931	2949	2982	3010	3035						4ebp1-70-PDZ	10	0.0294358	0.0330381	0.0324369	0.0236062	0.00497507	0.00277747	0.00541511	0.0102669	0.0144001	0.0181032	-2.02061e-05	0.0295691	8.62055e-06
J	19	Sample X235			2824	2820	2838	2818	2758	2692	2681	2696	2723	2732						PYGM15	10	-0.0127749	-0.0133521	-0.0107523	-0.0136406	-0.022261	-0.0316667	-0.0332265	-0.0310989	-0.0272588	-0.0259758	-1.94975e-05	-0.0105023	3.77316e-06
K	19	Sample X259			2850	2860	2877	2886	2840	2781	2750	2753	2789	2791						PYGM15	10	-0.0090157	-0.00756646	-0.00509843	-0.00378962	-0.0104631	-0.0189644	-0.0234053	-0.0229763	-0.0178155	-0.0175281	-1.54087e-05	-0.00441706	1.6103e-06
L	19	Sample X283			3536	3570	3560	3547	3461	3429	3440	3462	3496	3499						PYGM15	10	0.0949639	0.10037	0.0987773	0.0967101	0.0831268	0.0781127	0.0798338	0.0832838	0.0886358	0.0891092	-1.35324e-05	0.0974117	5.35924e-06
A	20	Sample X20			3682	3676	3777	3517	3487	3560	3591	3634	3644	3662						4ebp1-70-SGS	10	0.118356	0.117385	0.13383	0.0919538	0.0872167	0.0987773	0.103721	0.110614	0.112223	0.115124	-6.79014e-06	0.112994	-3.36074e-05
B	20	Sample X44			3051	2968	3022	3013	2856	2844	2884	2914	2953	2965						4ebp1-70-SGS	10	0.0204796	0.00820601	0.016176	0.0148438	-0.00814638	-0.00988434	-0.0040806	0.000292041	0.00600209	0.00776488	-1.35248e-05	0.0132802	2.92536e-06
C	20	Sample X68			3847	3827	3854	3732	3699	3725	3752	3771	3784	3789						4ebp1-70-SGS	10	0.145362	0.142056	0.146522	0.126475	0.12111	0.125335	0.129738	0.132847	0.134978	0.135799	-9.59469e-06	0.139779	-7.32721e-06
D	20	Sample X92			3063	3074	3119	3162	2998	2961	2991	2994	3010	3002						L5A-PDZ	10	0.0222652	0.0239044	0.0306353	0.0371045	0.0126269	0.00717698	0.0115938	0.0120364	0.0144001	0.0132176	-1.63099e-05	0.028282	-2.48906e-05
E	20	Sample X116			3456	3544	3531	3477	3416	3419	3444	3468	3478	3487						L5A-PDZ	10	0.0823419	0.0962336	0.094171	0.0856419	0.0760819	0.0765502	0.0804603	0.0842265	0.0857993	0.0872167	-4.74575e-06	0.0877198	-5.66143e-06
F	20	Sample X140			3281	3254	3292	3257	3131	3100	3121	3158	3176	3193						L5A-PDZ	10	0.055201	0.0510699	0.0568884	0.0515282	0.0324369	0.0277885	0.0309354	0.0365011	0.0392187	0.0417912	-1.87884e-05	0.053609	-6.49319e-06
G	20	Sample X164			3129	3190	3147	3082	3044	3058	3085	3102	3115	3125						L5A-SGS	10	0.0321365	0.0413368	0.0348436	0.0250981	0.0194393	0.0215208	0.0255461	0.0280878	0.0300354	0.0315358	-5.8015e-06	0.0324389	-5.77843e-06
H	20	Sample X188			3228	3270	3209	3144	3146	3160	3180	3187	3199	3230						L5A-SGS	10	0.0471059	0.0535162	0.0442177	0.034392	0.034693	0.0368028	0.0398234	0.0408826	0.0427005	0.0474103	-3.59804e-06	0.0443133	-9.96731e-06
I	20	Sample X212			3290	3335	3282	3208	3131	3121	3152	3185	3205	3193						L5A-SGS	10	0.0565814	0.0635081	0.0553543	0.0440659	0.0324369	0.0309354	0.0355967	0.0405799	0.0436106	0.0417912	-1.88473e-05	0.0557544	-1.84205e-05
J	20	Sample X236			3157	3141	3149	3126	3119	3110	3123	3124	3127	3136						PO4-std	10	0.0363503	0.0339405	0.0351448	0.0316859	0.0306353	0.0292859	0.0312355	0.0313856	0.0318361	0.0331885	-3.26687e-06	0.034429	-9.4159e-06
K	20	Sample X260			3262	3230	3224	3208	3220	3235	3239	3248	3239	3241						PO4-std	10	0.0522924	0.0474103	0.0464972	0.0440659	0.0458889	0.0481718	0.0487813	0.0501539	0.0487813	0.0490862	7.80482e-07	0.0476446	-5.42911e-06
L	20	Sample X284			547	534	533	523	517	510	503	499	495	483						PO4-std	10	-0.299212	-0.300636	-0.300745	-0.301839	-0.302495	-0.30326	-0.304024	-0.30446	-0.304896	-0.306203	-5.99144e-06	-0.299182	-0.000527017
A	21	Sample X21			3896	3753	3916	3865	3636	3658	3687	3688	3706	3722						IRSp53-PDZ	11	0.153502	0.129902	0.15684	0.148346	0.110935	0.114479	0.119165	0.119327	0.122246	0.124847	-2.94468e-05	0.147627	-2.55407e-05
B	21	Sample X45			3935	3861	3911	3950	3861	3862	3889	3898	3933	3928						IRSp53-PDZ	11	0.16002	0.147682	0.156005	0.162536	0.147682	0.147848	0.152336	0.153835	0.159685	0.158847	1.62535e-06	0.153672	2.21469e-05
C	21	Sample X69			3384	3355	3373	3448	3387	3220	3219	3285	3302	3325						IRSp53-PDZ	11	0.0710981	0.0666	0.0693899	0.0810872	0.0715644	0.0458889	0.0457369	0.0558143	0.0584244	0.0619652	-1.71227e-05	0.0730305	5.81082e-07
D	21	Sample X93			3822	3731	3802	3823	3662	3581	3621	3645	3681	3686						IRSp53-SGS	11	0.141231	0.126312	0.137936	0.141396	0.115124	0.102124	0.108526	0.112384	0.118194	0.119003	-2.50627e-05	0.137261	-1.15128e-05
E	21	Sample X117			3323	3314	3339	3352	3248	3241	3258	3283	3302	3322						IRSp53-SGS	11	0.0616569	0.0602704	0.0641258	0.0661357	0.0501539	0.0490862	0.051681	0.0555076	0.0584244	0.0615027	-5.14302e-06	0.0609403	4.39588e-06
F	21	Sample X141			3101	3046	3049	3054	3047	2995	3004	3018	3043	3056						IRSp53-SGS	11	0.0279382	0.0197364	0.0201823	0.0209257	0.019885	0.012184	0.0135131	0.0155837	0.0192908	0.0212232	-5.8831e-06	0.0225761	4.19261e-06
G	21	Sample X165			3125	3113	3118	3107	3060	3041	3064	3063	3102	3103						4ebp1-70-PDZ	11	0.0315358	0.0297355	0.0304853	0.0288365	0.0218185	0.0189938	0.0224141	0.0222652	0.0280878	0.0282375	-5.27326e-06	0.029405	-5.071e-06
H	21	Sample X189			1986	1974	1990	2032	2036	1946	1915	1909	1922	1937						4ebp1-70-PDZ	11	-0.127508	-0.129066	-0.126989	-0.121518	-0.120995	-0.13269	-0.136689	-0.137461	-0.135787	-0.133853	-1.0794e-05	-0.123779	-3.69258e-06
I	21	Sample X213			4159	4203	4220	4243	4230	4104	3980	3972	3987	4035						4ebp1-70-PDZ	11	0.198155	0.205789	0.208751	0.21277	0.210497	0.18868	0.167585	0.166237	0.168766	0.176896	-4.14361e-05	0.215274	-1.26094e-05
J	21	Sample X237			2824	2812	2826	2812	2781	2722	2691	2697	2718	2731						PYGM15	11	-0.0127749	-0.0145057	-0.0124862	-0.0145057	-0.0189644	-0.0274013	-0.0318086	-0.0309569	-0.0279709	-0.0261184	-1.85377e-05	-0.0106267	4.73293e-06
K	21	Sample X261			2680	2697	2733	2710	2636	2565	2570	2608	2632	2630						PYGM15	11	-0.0333682	-0.0309569	-0.0258332	-0.0291094	-0.039585	-0.049543	-0.0488447	-0.0435229	-0.0401484	-0.04043	-1.44196e-05	-0.0294824	2.5994e-06
L	21	Sample X285			3505	3521	3536	3571	3506	3421	3420	3447	3483	3493						PYGM15	11	0.0900566	0.0925868	0.0949639	0.100529	0.0902146	0.0768625	0.0767064	0.0809304	0.0865865	0.0881626	-1.08099e-05	0.0942459	8.08167e-06
A	22	Sample X22			3403	3437	3468	3328	3359	3362	3378	3375	3377	3405						4ebp1-70-SGS	11	0.0740546	0.0793642	0.0842265	0.0624278	0.0672194	0.0676842	0.070166	0.0697003	0.0700107	0.0743663	-5.63742e-06	0.0753045	-3.24547e-05
B	22	Sample X46			2881	2967	3106	3092	2930	2860	2920	2914	2895	2897						4ebp1-70-SGS	11	-0.00451693	0.00805895	0.0286867	0.026592	0.00263111	-0.00756646	0.00116862	0.000292041	-0.00247928	-0.00218789	-1.42044e-05	0.0135905	2.24575e-06
C	22	Sample X70			3668	4122	4196	4208	4051	4073	4179	4189	4191	4253						4ebp1-70-SGS	11	0.116093	0.191773	0.204571	0.206659	0.179619	0.183372	0.201619	0.203355	0.203702	0.214522	4.80767e-05	0.161682	5.03442e-05
D	22	Sample X94			2960	2931	2978	3017	2934	2872	2878	2892	2914	2923						L5A-PDZ	11	0.00703005	0.00277747	0.0096777	0.0154357	0.00321664	-0.00582489	-0.00495309	-0.00291623	0.000292041	0.00160717	-1.00698e-05	0.00867612	-1.86505e-05
E	22	Sample X118			3375	3336	3336	3303	3239	3278	3285	3310	3321	3345						L5A-PDZ	11	0.0697003	0.0636625	0.0636625	0.0585781	0.0487813	0.0547413	0.0558143	0.0596548	0.0613486	0.065053	-4.06021e-06	0.0625358	-4.97589e-06
F	22	Sample X142			3194	3178	3194	3194	3071	3013	3040	3052	3087	3098						L5A-PDZ	11	0.0419427	0.039521	0.0419427	0.0419427	0.0234571	0.0148438	0.0188453	0.0206283	0.0258448	0.0274893	-2.07218e-05	0.0420788	-8.42657e-06
G	22	Sample X166			3086	3177	3185	3067	3013	3042	3044	3075	3101	3099						L5A-SGS	11	0.0256954	0.0393698	0.0405799	0.022861	0.0148438	0.0191423	0.0194393	0.0240536	0.0279382	0.0276389	-7.63276e-06	0.0307359	-7.60969e-06
H	22	Sample X190			2859	2867	2812	2780	2785	2802	2809	2822	2835	2837						L5A-SGS	11	-0.00771147	-0.00655087	-0.0145057	-0.019108	-0.0183901	-0.0159459	-0.014938	-0.0130636	-0.011186	-0.0108969	-1.96718e-06	-0.0120493	-8.33645e-06
I	22	Sample X214			3463	3431	3398	3403	3407	3395	3429	3437	3435	3446						L5A-SGS	11	0.0834409	0.0784254	0.0732759	0.0740546	0.074678	0.0728088	0.0781127	0.0793642	0.0790512	0.0807737	1.06679e-06	0.0767585	1.49357e-06
J	22	Sample X238			2593	2621	2616	2619	2623	2621	2636	2635	2657	2655						PO4-std	11	-0.0456267	-0.0416963	-0.0423992	-0.0419775	-0.041415	-0.0416963	-0.039585	-0.0397258	-0.0366223	-0.0369048	6.78175e-06	-0.0448339	6.32724e-07
K	22	Sample X262			3159	3152	3151	3125	3128	3119	3136	3135	3127	3153						PO4-std	11	0.0366519	0.0355967	0.0354461	0.0315358	0.0319863	0.0306353	0.0331885	0.0330381	0.0318361	0.0357474	-2.16655e-06	0.0348661	-8.37615e-06
L	22	Sample X286			577	573	566	559	553	549	551	547	540	541						PO4-std	11	-0.295917	-0.296357	-0.297126	-0.297895	-0.298554	-0.298992	-0.298773	-0.299212	-0.299979	-0.299869	-3.75857e-06	-0.296012	-0.000524784
A	23	Sample X23			3839	3732	3809	3646	3652	3705	3714	3749	3763	3768						IRSp53-PDZ	12	0.144039	0.126475	0.139088	0.112545	0.113511	0.122084	0.123546	0.129248	0.131537	0.132355	-3.9061e-06	0.129786	0
B	23	Sample X47			4117	3959	4024	4052	3927	3836	3865	3923	3951	3985						IRSp53-PDZ	12	0.190913	0.164049	0.175028	0.179789	0.15868	0.143543	0.148346	0.158011	0.162704	0.168429	-2.05215e-05	0.177262	0
C	23	Sample X71			3373	3348	3401	3420	3261	3185	3219	3271	3289	3314						IRSp53-PDZ	12	0.0693899	0.0655169	0.0737431	0.0767064	0.0521395	0.0405799	0.0457369	0.0536693	0.0564279	0.0602704	-1.77038e-05	0.0700403	0
D	23	Sample X95			3452	3373	3413	3376	3274	3263	3305	3322	3348	3355						IRSp53-SGS	12	0.0817144	0.0693899	0.0756137	0.0698555	0.0541286	0.0524453	0.0588857	0.0615027	0.0655169	0.0666	-1.35499e-05	0.0736952	0
E	23	Sample X119			3266	3312	3308	3233	3138	3155	3259	3200	3230	3242						IRSp53-SGS	12	0.0529041	0.0599626	0.0593471	0.0478671	0.0334892	0.0360488	0.0518338	0.0428521	0.0474103	0.0492387	-9.53889e-06	0.0538187	0
F	23	Sample X143			2314	2304	2322	2320	2237	2201	2225	2249	2256	2263						IRSp53-SGS	12	-0.0840364	-0.0853881	-0.0829537	-0.0832245	-0.0944015	-0.0992134	-0.0960079	-0.0927927	-0.0918531	-0.0909127	-1.00757e-05	-0.084033	0
G	23	Sample X167			3894	3922	3946	3898	3841	3870	3859	3894	3931	3923						4ebp1-70-PDZ	12	0.153168	0.157843	0.161865	0.153835	0.144369	0.149176	0.147351	0.153168	0.15935	0.158011	-2.0226e-07	0.153935	0
H	23	Sample X191			2854	2839	2851	2885	2829	2793	2793	2800	2817	2826						4ebp1-70-PDZ	12	-0.00843623	-0.0106077	-0.00887086	-0.00393512	-0.012053	-0.0172406	-0.0172406	-0.0162338	-0.0137849	-0.0124862	-7.10145e-06	-0.00782802	0
I	23	Sample X215			3403	3452	3504	3525	3384	3256	3259	3292	3310	3326						4ebp1-70-PDZ	12	0.0740546	0.0817144	0.0898987	0.0932202	0.0710981	0.0513754	0.0518338	0.0568884	0.0596548	0.0621194	-2.88267e-05	0.0864818	0
J	23	Sample X239			2860	2871	2895	2907	2813	2719	2707	2737	2738	2773						PYGM15	12	-0.00756646	-0.00597012	-0.00247928	-0.00072977	-0.0143616	-0.0278285	-0.029536	-0.0252624	-0.0251196	-0.0201122	-2.32707e-05	-0.0019342	0
K	23	Sample X263			2706	2723	2756	2781	2756	2665	2627	2630	2631	2645						PYGM15	12	-0.0296782	-0.0272588	-0.0225472	-0.0189644	-0.0225472	-0.0354915	-0.0408522	-0.04043	-0.0402892	-0.0383162	-1.7019e-05	-0.0214261	0
L	23	Sample X287			3622	3658	3702	3744	3612	3489	3520	3550	3578	3598						PYGM15	12	0.108686	0.114479	0.121597	0.128432	0.107082	0.0875319	0.0924285	0.0971868	0.101645	0.104841	-1.88916e-05	0.117726	0
A	24	Sample X24			3210	3101	3131	3152	3200	3249	3256	3291	3290	3322						4ebp1-70-SGS	12	0.0443695	0.0279382	0.0324369	0.0355967	0.0428521	0.0503065	0.0513754	0.0567349	0.0565814	0.0615027	2.68173e-05	0.0298791	0
B	24	Sample X48			2989	2961	3006	3046	2843	2831	2862	2875	2904	2922						4ebp1-70-SGS	12	0.0112988	0.00717698	0.0138087	0.0197364	-0.010029	-0.0117641	-0.00727639	-0.00538907	-0.0011674	0.00146097	-1.64502e-05	0.0116557	0
C	24	Sample X72			3702	3708	3749	3564	3589	3616	3641	3662	3693	3703						4ebp1-70-SGS	12	0.121597	0.122571	0.129248	0.099414	0.103402	0.107724	0.11174	0.115124	0.120137	0.121759	-2.26748e-06	0.116632	0
D	24	Sample X96			2808	2828	2870	2795	2801	2828	2836	2869	2876	2885						L5A-PDZ	12	-0.015082	-0.0121974	-0.00611534	-0.016953	-0.0160899	-0.0121974	-0.0110415	-0.00626054	-0.00524376	-0.00393512	8.58074e-06	-0.01566	0
E	24	Sample X120			3331	3327	3262	3204	3239	3266	3287	3293	3293	3323						L5A-PDZ	12	0.0628907	0.0622736	0.0522924	0.0434588	0.0487813	0.0529041	0.0561211	0.0570419	0.0570419	0.0616569	9.15681e-07	0.0548969	0
F	24	Sample X144			3165	3177	3203	3113	2988	3037	3060	3099	3095	3119						L5A-PDZ	12	0.0375572	0.0393698	0.0433071	0.0297355	0.0111513	0.0184	0.0218185	0.0276389	0.0270405	0.0306353	-1.22952e-05	0.0360426	0
G	24	Sample X168			3018	3098	3019	2927	2947	2963	2991	3025	3032	3043						L5A-SGS	12	0.0155837	0.0274893	0.0157318	0.00219216	0.00512173	0.00747089	0.0115938	0.0166205	0.0176582	0.0192908	-2.30697e-08	0.0138891	0
H	24	Sample X192			2820	2855	2880	2827	2825	2849	2849	2869	2874	2898						L5A-SGS	12	-0.0133521	-0.00829131	-0.00466233	-0.0123418	-0.0126306	-0.00916052	-0.00916052	-0.00626054	-0.00553436	-0.00204216	6.36927e-06	-0.0121652	0
I	24	Sample X216			3528	3431	3454	3464	3457	3468	3480	3458	3478	3477						L5A-SGS	12	0.0936955	0.0784254	0.0820281	0.0835979	0.0824988	0.0842265	0.0861141	0.0826558	0.0857993	0.0856419	-4.26776e-07	0.0847244	0
J	24	Sample X240			2904	2893	2887	2877	2896	2916	2924	2911	2927	2939						PO4-std	12	-0.0011674	-0.0027706	-0.00364411	-0.00509843	-0.00233359	0.000584158	0.00175339	-0.000145992	0.00219216	0.00394899	6.14902e-06	-0.00435756	0
K	24	Sample X264			3018	3021	3026	3032	3032	3022	3049	3039	3065	3064						PO4-std	12	0.0155837	0.0160279	0.0167687	0.0176582	0.0176582	0.016176	0.0201823	0.0186968	0.022563	0.0224141	6.2096e-06	0.0146471	0
L	24	Sample X288			421	407	404	2880	2842	3821	3854	3850	3871	3872						PO4-std	12	-0.312928	-0.31444	-0.314764	-0.00466233	-0.0101737	0.141066	0.146522	0.145859	0.149342	0.149508	0.000521025	-0.335082	0
[truncated: 11 more columns]
