# Supplementary material for: PDZ-directed substrate recruitment is the primary determinant of specific 4E-BP1 dephosphorylation by PP1-Neurabin
Source: eLife journal article supplement (doi:10.7554/elife.103403), 2024-11-20
Supplement: fig5-data1 [file repli1.xlsx]

## Sheet: All Cycles
Well Row	Well Col	Content							convert to phosphate	Well Row	Well Col	Raw Data (425-10/460-20)	Raw Data (425-10/460-20)	Raw Data (425-10/460-20)				normalize to the lasst column	Well Row	Well Col	Raw Data (425-10/460-20)	Raw Data (425-10/460-20)	Raw Data (425-10/460-20)								PP1-Neb 0.25 nM																PP1-Ph3 2.5 nM
		Time [s]	0	240	480							0	4	8							0	4	8								V1	V2	V3	V4	V5	V6	V7	V8	4ebp-pdz	4ebp-sgs	irsp53-pdz	irsp53-sgs	L5A-PDZ	L5A-SGS			V1	V2	V3
A	1	Sample X1	32567	46116	48840				1.20388	A	1	3.74194	32.4578	429.683					A	1	0.968253	32.2588	429.537		99.3195	53.5711	1			400	53.5711	0.173826	0.160699	0.125635	0.128136	-81.2419	0.72245	6.77237	0.252627	0.106161	2.29538	0.366626	0.441482	0.291345			-2.94783	0.220231	0.287345
A	2	Sample X2	38612	55373	56618					A	2	7.36959	-19.024	-16.3014					A	2	7.04987	-19.2336	-16.5328		0.6752	-2.94783	1			200	-333.273	0.173149	0.161663	0.134387	0.121154	-10.0756	0.592879	5.4866	0.248783	0.0810078	2.54823	0.339037	0.890039	0.279906			-2.53721	0.141504	0.247828
A	3	Sample X3	32973	46027	49119					A	3	3.90028	31.4376	-2662.38					A	3	3.66465	31.2385	-2662.52		-673.44	-333.273	1			100	4.58183	0.153439	0.135613	0.119137	0.110361	2.23268	0.466458	1.91191	0.200666	0.0382924	0.767894	0.123519	1.19932	0.142086			-5.70032	0.110877	0.142054
A	4	Sample X4	31833	53545	56298					A	4	3.47459	-25.7726	-16.9115					A	4	3.15486	-25.9822	-17.1428		2.20984	-2.53721	1			50	25.2881	0.161954	0.126598	0.117747	0.110329	1.86032	0.419706	6.7932	0.165557	0.0417299	2.64189	0.228676	1.0814	0.14559			4.07994	0.053272	0.0822583
A	5	Sample X5	28852	42514	46592					A	5	2.58822	13.2586	39.1536					A	5	2.35259	13.0595	39.0072		6.48692	4.58183	1			25	1.9435	0.15586	0.109012	0.104722	0.110419	1.7317	0.439882	2.81978	0.139522	0.01735	1.50043	0.0865481	0.794812	0.0683379			0.824375	0.0246102	0.0533435
A	6	Sample X6	25743	47501	51595					A	6	1.90503	63.1558	-43.786					A	6	1.5853	62.9462	-44.0173		-26.7409	-5.70032	1			12.5	1.42908	0.18253	0.108978	0.108246	0.112998	1.0307	0.410511	1.03576	0.114448	0.0143735	0.846638	0.0415662	0.484145	0.0402537			0.323795	0.00514433	0.0264892
A	7	Sample X7	29328	43240	48580					A	7	2.7118	15.2226	204.927					A	7	2.47617	15.0235	204.781		47.4393	25.2881	1			6.25	0.437384	0.116531	0.11174	0.0816059	0.0696697	0.627832	0.295357	0.576339	0.0869295	0.00951116	0.501687	0.0135288	0.306897	0.0247558			0.142965	-0.00442226	0.0157465
A	8	Sample X8	19590	40156	46204					A	8	0.977586	9.08411	33.5287					A	8	0.657862	8.87453	33.2974		6.10571	4.07994	0			3.125	0.26948	0.0833248	0.0739418	0.0573629	0.0703508	0.253135	0.176931	0.293906	0.0489174	0.00849948	0.203205	0.00677543	0.169124	0.0108804			0.0849488	0.00629779	0.00858528
A	9	Sample X9	23658	37763	43771					A	9	1.54047	6.62617	16.9992					A	9	1.30484	6.42712	16.8528		2.60643	1.9435	0			1.5625	0.113925	0.0481815	0.0395719	0.045047	0.0398056	0.11378	0.0931818	0.178059	0.0260431	0.00967204	0.109057	-0.00454559	0.0912232	0.00535065			0.0340214	-0.00439201	0.00255132
A	10	Sample X10	16151	30376	38338					A	10	0.61022	3.00607	7.11682					A	10	0.290497	2.79648	6.8855		1.02225	0.824375	0			0.78125	0.0699526	0.022215	0.0254797	0.0283275	0.025205	0.0710237	0.0482496	0.0753333	0.00749305	0.00338852	0.051568	-0.00587007	0.0411851	0.00658228			0.0202449	-0.00182349	0.00285676
A	11	Sample X11	20788	33342	42169					A	11	1.12653	4.05128	12.4699					A	11	0.890905	3.85222	12.3236		2.11784	1.42908	0			0.390625	0.0358468	0.0195062	0.0107775	0.0199816	0.0170428	0.0710723	0.0277471	0.0362849	0.00159616	0.00426605	0.0212839	0.00282687	0.0239059	0.000785425			0.00971686	-0.00174574	0.00180141
A	12	Sample X12	14880	24172	30339					A	12	0.493146	1.62467	2.99512					A	12	0.173423	1.41508	2.76379		0.337176	0.323795	0			0	0	0	0	0	0	0	0	0	0	0	0	0	0	0			0	0	0
A	13	Sample X13	17625	27340	33615					A	13	0.757841	2.23155	4.16764					A	13	0.522212	2.0325	4.02128		0.497196	0.437384	0
A	14	Sample X14	12485	17515	22413					A	14	0.294639	0.746349	1.34996					A	14	-0.0250846	0.536764	1.11863		0.145467	0.142965	0				3	27	51	75	99	123	147	171	195	219	243	267	291	315	339		3	27	51
A	15	Sample X15	15742	22780	29047					A	15	0.571572	1.40424	2.63814					A	15	0.335943	1.20519	2.49178		0.321649	0.26948	0				PP1-Neb 0.25 nM																PP1-Ph3 2.5 nM
A	16	Sample X16	11984	14645	18458					A	16	0.256355	0.472447	0.847551					A	16	-0.0633678	0.262861	0.616223		0.0883403	0.0849488	0				V1	V2	V3	V4	V5	V6	V7	V8	4ebp-pdz	4ebp-sgs	irsp53-pdz	irsp53-sgs	L5A-PDZ	L5A-SGS			V1	V2	V3
A	17	Sample X17	14757	19050	22097					A	17	0.482277	0.914332	1.30441					A	17	0.246647	0.715274	1.15805		0.110694	0.113925	0		0	400	na	0.173826	0.160699	0.125635	0.128136	na	0.72245	na	0.252627	0.106161	na	0.366626	0.441482	0.291345			na	0.220231	0.287345
A	18	Sample X18	12435	13005	14669					A	18	0.290771	0.335498	0.474548					A	18	-0.0289523	0.125913	0.243219		0.0293265	0.0340214	0		2	200	na	0.173149	0.161663	0.134387	0.121154	na	0.592879	na	0.248783	0.0810078	2.54823	0.339037	0.890039	0.279906			na	0.141504	0.247828
A	19	Sample X19	12067	14696	17386					A	19	0.262626	0.476915	0.732973					A	19	0.0269966	0.277857	0.586618		0.0771902	0.0699526	0		4	100	na	0.153439	0.135613	0.119137	0.110361	na	0.466458	na	0.200666	0.0382924	0.767894	0.123519	1.19932	0.142086			na	0.110877	0.142054
A	20	Sample X20	12140	11765	13083					A	20	0.268165	0.239944	0.341729					A	20	-0.0515586	0.0303585	0.1104		0.0200105	0.0202449	0		6	50	na	0.161954	0.126598	0.117747	0.110329	na	0.419706	na	0.165557	0.0417299	2.64189	0.228676	1.0814	0.14559			4.07994	0.053272	0.0822583
A	21	Sample X21	12657	13567	15019					A	21	0.308025	0.381004	0.505524					A	21	0.0723951	0.181946	0.359169		0.0443059	0.0358468	0		8	25	1.9435	0.15586	0.109012	0.104722	0.110419	1.7317	0.439882	2.81978	0.139522	0.01735	1.50043	0.0865481	0.794812	0.0683379			0.824375	0.0246102	0.0533435
A	22	Sample X22	12371	11641	12232					A	22	0.285836	0.230736	0.275176					A	22	-0.0338876	0.0211512	0.0438473		0.00567401	0.00971686	0		10	12.5	1.42908	0.18253	0.108978	0.108246	0.112998	1.0307	0.410511	1.03576	0.114448	0.0143735	0.846638	0.0415662	0.484145	0.0402537			0.323795	0.00514433	0.0264892
A	23	Sample X23	11707	11208	10465					A	23	0.235629	0.199058	0.146355					A	23	0	0	0		0	0	0		12	6.25	0.437384	0.116531	0.11174	0.0816059	0.0696697	0.627832	0.295357	0.576339	0.0869295	0.00951116	0.501687	0.0135288	0.306897	0.0247558			0.142965	-0.00442226	0.0157465
A	24	Sample X24	12806	11353	11649					A	24	0.319723	0.209585	0.231329					A	24	0	0	0		0	0	0		14	3.125	0.26948	0.0833248	0.0739418	0.0573629	0.0703508	0.253135	0.176931	0.293906	0.0489174	0.00849948	0.203205	0.00677543	0.169124	0.0108804			0.0849488	0.00629779	0.00858528
B	1	Sample X25	15737	21225	25836					B	1	0.571106	1.18406	1.92281					B	1	0.365451	1.04651	1.75606		0.177388	0.173826	0		16	1.5625	0.113925	0.0481815	0.0395719	0.045047	0.0398056	0.11378	0.0931818	0.178059	0.0260431	0.00967204	0.109057	-0.00454559	0.0912232	0.00535065			0.0340214	-0.00439201	0.00255132
B	2	Sample X26	13386	21512	26672					B	2	0.366192	1.22283	2.08931					B	2	0.174131	1.12013	1.93598		0.203962	0.220231	0		18	0.78125	0.0699526	0.022215	0.0254797	0.0283275	0.025205	0.0710237	0.0482496	0.0753333	0.00749305	0.00338852	0.051568	-0.00587007	0.0411851	0.00658228			0.0202449	-0.00182349	0.00285676
B	3	Sample X27	15112	21273	25505					B	3	0.513862	1.19049	1.86015					B	3	0.308207	1.05294	1.6934		0.160116	0.173149	0		20	0.390625	0.0358468	0.0195062	0.0107775	0.0199816	0.0170428	0.0710723	0.0277471	0.0362849	0.00159616	0.00426605	0.0212839	0.00282687	0.0239059	0.000785425			0.00971686	-0.00174574	0.00180141
B	4	Sample X28	11959	17920	22398					B	4	0.254472	0.789063	1.34777					B	4	0.0624118	0.686371	1.19444		0.127019	0.141504	0		22	0	0	0	0	0	0	0	0	0	0	0	0	0	0	0			0	0	0
B	5	Sample X29	14591	20740	24360					B	5	0.46773	1.12032	1.65634					B	5	0.262075	0.982776	1.48959		0.126704	0.153439	0
B	6	Sample X30	11269	16263	20199					B	6	0.203477	0.620971	1.05176					B	6	0.0114164	0.518279	0.898429		0.0950376	0.110877	0
B	7	Sample X31	14533	20491	24726					B	7	0.46268	1.08844	1.71941					B	7	0.257025	0.950896	1.55265		0.15044	0.161954	0
B	8	Sample X32	11364	13850	16021					B	8	0.210387	0.404468	0.597832					B	8	0.0183267	0.301776	0.444502		0.0356817	0.053272	0
B	9	Sample X33	14529	20476	24442					B	9	0.462333	1.08654	1.67031					B	9	0.256678	0.948993	1.50356		0.138641	0.15586	0
B	10	Sample X34	10032	11382	12226					B	10	0.116566	0.2117	0.274718					B	10	-0.0754941	0.109008	0.121388		0.0030949	0.0246102	0
B	11	Sample X35	13840	20008	25315					B	11	0.403632	1.02816	1.82497					B	11	0.197977	0.890613	1.65822		0.191902	0.18253	0
B	12	Sample X36	11485	11293	11518					B	12	0.219239	0.205219	0.221663					B	12	0.0271789	0.102527	0.0683335		-0.00854837	0.00514433	0
B	13	Sample X37	13966	16877	22119					B	13	0.414195	0.68124	1.30754					B	13	0.20854	0.543691	1.14079		0.149275	0.116531	0
B	14	Sample X38	11711	10682	10686					B	14	0.235927	0.161537	0.161818					B	14	0.0438662	0.0588443	0.00848812		-0.012589	-0.00442226	0
B	15	Sample X39	12763	15001	19306					B	15	0.316337	0.503916	0.944033					B	15	0.110682	0.366367	0.77728		0.102728	0.0833248	0
B	16	Sample X40	10322	9923	10490					B	16	0.136444	0.109171	0.148095					B	16	-0.0556168	0.00647901	-0.00523451		-0.00292838	0.00629779	0
B	17	Sample X41	12868	14129	16776					B	17	0.324619	0.427972	0.671169					B	17	0.118964	0.290423	0.504416		0.0534981	0.0481815	0
B	18	Sample X42	11024	9985	9964					B	18	0.185815	0.113373	0.111948					B	18	-0.00624578	0.0106803	-0.0413818		-0.0130155	-0.00439201	0
B	19	Sample X43	11633	11662	13420					B	19	0.230144	0.232291	0.368962					B	19	0.0244892	0.0947425	0.202209		0.0268667	0.022215	0
B	20	Sample X44	10931	9390	10168					B	20	0.17917	0.0735954	0.125851					B	20	-0.0128908	-0.0290969	-0.0274787		0.000404549	-0.00182349	0
B	21	Sample X45	11212	12165	12765					B	21	0.199347	0.270066	0.316495					B	21	-0.00630802	0.132517	0.149742		0.00430604	0.0195062	0
B	22	Sample X46	10829	9433	10071					B	22	0.171919	0.07643	0.119222					B	22	-0.0201417	-0.0262623	-0.0341076		-0.00196134	-0.00174574	0
B	23	Sample X47	11299	10338	10756					B	23	0.205655	0.137549	0.166753					B	23	0	0	0		0	0	0
B	24	Sample X48	11111	9827	10565					B	24	0.19206	0.102692	0.15333					B	24	0	0	0		0	0	0
C	1	Sample X49	16455	21829	25811					C	1	0.639574	1.2666	1.91802					C	1	0.517827	1.15234	1.80342		0.16277	0.160699	0
C	2	Sample X50	16048	24706	29848					C	2	0.600397	1.71591	2.8538					C	2	0.457655	1.62241	2.75642		0.283502	0.287345	0
C	3	Sample X51	15744	21158	25493					C	3	0.571759	1.17512	1.85791					C	3	0.450012	1.06087	1.74332		0.170613	0.161663	0
C	4	Sample X52	15417	23288	28411					C	4	0.541532	1.48193	2.4788					C	4	0.398789	1.38843	2.38142		0.248247	0.247828	0
C	5	Sample X53	13854	19280	23292					C	5	0.404802	0.940993	1.48255					C	5	0.283055	0.826738	1.36796		0.135305	0.135613	0
C	6	Sample X54	13692	18960	23291					C	6	0.391321	0.904011	1.4824					C	6	0.248579	0.81051	1.38501		0.143626	0.142054	0
C	7	Sample X55	13668	18985	22718					C	7	0.389335	0.906872	1.39497					C	7	0.267588	0.792616	1.28037		0.121939	0.126598	0
C	8	Sample X56	11945	15504	18625					C	8	0.253419	0.549516	0.866127					C	8	0.110676	0.456015	0.768743		0.0781818	0.0822583	0
C	9	Sample X57	13152	18224	21434					C	9	0.347263	0.821862	1.21221					C	9	0.225517	0.707606	1.09762		0.0975022	0.109012	0
C	10	Sample X58	11068	12930	15729					C	10	0.18897	0.329533	0.57036					C	10	0.0462274	0.236032	0.472975		0.0592359	0.0533435	0
C	11	Sample X59	13452	17370	21610					C	11	0.371575	0.731321	1.23625					C	11	0.249828	0.617066	1.12166		0.126147	0.108978	0
C	12	Sample X60	10345	11482	12613					C	12	0.138033	0.219019	0.304588					C	12	-0.0047096	0.125518	0.207204		0.0204214	0.0264892	0
C	13	Sample X61	12875	16642	21432					C	13	0.325173	0.657904	1.21194					C	13	0.203426	0.543649	1.09734		0.138424	0.11174	0
C	14	Sample X62	10361	10297	11492					C	14	0.139139	0.134718	0.219753					C	14	-0.00360295	0.0412174	0.122369		0.0202878	0.0157465	0
C	15	Sample X63	11748	15040	18235					C	15	0.238678	0.507403	0.82306					C	15	0.116931	0.393148	0.708466		0.0788294	0.0739418	0
C	16	Sample X64	10371	10053	10705					C	16	0.139832	0.117996	0.163156					C	16	-0.00291083	0.0244949	0.0657714		0.0103191	0.00858528	0
C	17	Sample X65	12333	12792	15963					C	17	0.282913	0.31862	0.592337					C	17	0.161167	0.204365	0.477742		0.0683443	0.0395719	0
C	18	Sample X66	10623	10414	10264					C	18	0.157392	0.142812	0.132444					C	18	0.0146495	0.0493109	0.03506		-0.00356271	0.00255132	0
C	19	Sample X67	11087	12057	13640					C	19	0.190335	0.261869	0.38702					C	19	0.0685876	0.147614	0.272426		0.0312029	0.0254797	0
C	20	Sample X68	10655	9815	10332					C	20	0.159638	0.101885	0.137134					C	20	0.0168959	0.00838374	0.03975		0.00784156	0.00285676	0
C	21	Sample X69	11454	11869	12503					C	21	0.216966	0.247713	0.296034					C	21	0.095219	0.133458	0.181439		0.0119952	0.0107775	0
C	22	Sample X70	10296	10136	9842					C	22	0.134649	0.123661	0.103703					C	22	-0.00809305	0.0301598	0.00631822		-0.00596038	0.00180141	0
C	23	Sample X71	10108	9998	10003					C	23	0.121747	0.114255	0.114595					C	23	0	0	0		0	0	0
C	24	Sample X72	10413	9690	9748					C	24	0.142742	0.0935009	0.0973843					C	24	0	0	0		0	0	0
D	1	Sample X73	14218	18228	21900					D	1	0.435549	0.822297	1.27654					D	1	0.164722	0.696378	1.1698		0.118356	0.125635	0
D	2	Sample X74	12928	17852	21704					D	2	0.329374	0.781814	1.24922					D	2	0.214235	0.6989	1.19094		0.12301	0.122088	0
D	3	Sample X75	14205	18294	22382					D	3	0.43444	0.829506	1.34544					D	3	0.163612	0.703586	1.23871		0.13378	0.134387	0
D	4	Sample X76	12452	16477	19889					D	4	0.292085	0.641719	1.01362					D	4	0.176946	0.558806	0.955339		0.0991332	0.0972991	0
D	5	Sample X77	12907	17402	20712					D	5	0.327708	0.734626	1.11671					D	5	0.0568802	0.608706	1.00997		0.100317	0.119137	0
D	6	Sample X78	10576	12537	14744					D	6	0.154099	0.298672	0.481132					D	6	0.038961	0.215759	0.422856		0.0517742	0.0479868	0
D	7	Sample X79	12903	16882	20623					D	7	0.327391	0.68174	1.10528					D	7	0.0565631	0.555821	0.998537		0.110679	0.117747	0
D	8	Sample X80	10245	11579	12417					D	8	0.131137	0.226156	0.289381					D	8	0.0159985	0.143242	0.231104		0.0219655	0.0268882	0
D	9	Sample X81	12121	15823	19275					D	9	0.266721	0.579151	0.940409					D	9	-0.00410684	0.453231	0.833671		0.09511	0.104722	0
D	10	Sample X82	9897	10547	11246					D	10	0.107413	0.152072	0.201809					D	10	-0.00772493	0.0691584	0.143532		0.0185935	0.0189071	0
D	11	Sample X83	11666	16290	19224					D	11	0.232588	0.623574	0.934464					D	11	-0.03824	0.497655	0.827726		0.0825179	0.108246	0
D	12	Sample X84	9579	9831	10337					D	12	0.0861006	0.102962	0.13748					D	12	-0.0290377	0.0200483	0.0792031		0.0147887	0.0135301	0
D	13	Sample X85	11203	14599	16939					D	13	0.198696	0.468428	0.687454					D	13	-0.0721315	0.342508	0.580716		0.059552	0.0816059	0
D	14	Sample X86	9618	9176	9384					D	14	0.088696	0.059579	0.0732003					D	14	-0.0264424	-0.0233344	0.0149236		0.00956449	0.00517075	0
D	15	Sample X87	11236	13346	14911					D	15	0.201084	0.362938	0.495898					D	15	-0.0697433	0.237019	0.38916		0.0380353	0.0573629	0
D	16	Sample X88	9804	8759	9601					D	16	0.101145	0.0326941	0.087564					D	16	-0.0139936	-0.0502192	0.0292873		0.0198766	0.00541012	0
D	17	Sample X89	9879	11865	12586					D	17	0.106198	0.247414	0.302484					D	17	-0.16463	0.121494	0.195746		0.0185629	0.045047	0
D	18	Sample X90	9908	9597	9418					D	18	0.108157	0.0872978	0.0754405					D	18	-0.0069815	0.00438448	0.0171637		0.00319482	0.00301816	0
D	19	Sample X91	10407	10917	11288					D	19	0.142326	0.178172	0.204856					D	19	-0.128502	0.0522524	0.0981181		0.0114664	0.0283275	0
D	20	Sample X92	9652	8481	8900					D	20	0.0909628	0.0150777	0.0417222					D	20	-0.0241756	-0.0678356	-0.0165545		0.0128203	0.000952638	0
D	21	Sample X93	10152	9860	10090					D	21	0.124755	0.104916	0.120518					D	21	-0.146072	-0.0210038	0.0137801		0.00869599	0.0199816	0
D	22	Sample X94	9928	9037	8931					D	22	0.10951	0.0505552	0.0437157					D	22	-0.00562874	-0.0323582	-0.0145611		0.00444928	-0.00111654	0
D	23	Sample X95	12175	10169	9887					D	23	0.270828	0.12592	0.106738					D	23	0	0	0		0	0	0
D	24	Sample X96	10011	9531	9156					D	24	0.115138	0.0829133	0.0582767					D	24	0	0	0		0	0	0
E	1	Sample X97	14543	19659	23105					E	1	0.46355	0.985835	1.45359					E	1	0.442795	0.983096	1.46788		0.121196	0.128136	0
E	2	Sample X98	27406	36378	38045					E	2	2.24608	5.62671	6.86042					E	2	2.23685	5.60469	6.87095		0.316563	0.579262	0
E	3	Sample X99	13458	18660	22110					E	3	0.372066	0.870046	1.30626					E	3	0.351311	0.867307	1.32054		0.11331	0.121154	0
E	4	Sample X100	24599	34314	36079					E	4	1.69731	4.48517	5.43889					E	4	1.68807	4.46315	5.44942		0.246569	0.470169	0
E	5	Sample X101	12831	17863	21116					E	5	0.321695	0.782984	1.16954					E	5	0.300941	0.780245	1.18383		0.100896	0.110361	0
E	6	Sample X102	19992	31226	33841					E	6	1.0262	3.2701	4.26711					E	6	1.01696	3.24808	4.27764		0.257389	0.407585	0
E	7	Sample X103	12435	17652	20879					E	7	0.290771	0.760675	1.13837					E	7	0.270017	0.757935	1.15265		0.0986792	0.110329	0
E	8	Sample X104	15639	26787	30615					E	8	0.561989	2.11319	3.07785					E	8	0.55275	2.09117	3.08838		0.249302	0.316954	0
E	9	Sample X105	11515	16590	20343					E	9	0.221443	0.652785	1.06976					E	9	0.200688	0.650046	1.08404		0.108499	0.110419	0
E	10	Sample X106	12894	20804	25093					E	10	0.326678	1.12861	1.78458					E	10	0.31744	1.10659	1.7951		0.172129	0.184708	0
E	11	Sample X107	12136	16365	20867					E	11	0.267861	0.630827	1.1368					E	11	0.247106	0.628087	1.15109		0.13075	0.112998	0
E	12	Sample X108	10442	15699	19214					E	12	0.144756	0.567564	0.933301					E	12	0.135518	0.545545	0.94383		0.0995713	0.101039	0
E	13	Sample X109	12058	15184	17875					E	13	0.261945	0.520349	0.784262					E	13	0.24119	0.51761	0.798548		0.0702346	0.0696697	0
E	14	Sample X110	9342	12085	14951					E	14	0.0704384	0.26399	0.499456					E	14	0.0612002	0.24197	0.509985		0.0670037	0.0560981	0
E	15	Sample X111	10730	14176	16991					E	15	0.164918	0.431969	0.692684					E	15	0.144163	0.429229	0.70697		0.0694352	0.0703508	0
E	16	Sample X112	8475	10265	12490					E	16	0.0147002	0.132513	0.295026					E	16	0.00546198	0.110494	0.305555		0.0487653	0.0375116	0
E	17	Sample X113	9864	11944	13659					E	17	0.105186	0.253343	0.38859					E	17	0.0844312	0.250604	0.402876		0.0380681	0.0398056	0
E	18	Sample X114	9316	8960	9485					E	18	0.0687315	0.0455833	0.0798661					E	18	0.0594933	0.0235639	0.0903953		0.0167078	0.00386274	0
E	19	Sample X115	9704	10910	12046					E	19	0.0944372	0.177674	0.261037					E	19	0.0736828	0.174934	0.275323		0.0250972	0.025205	0
E	20	Sample X116	8304	8615	9046					E	20	0.00398666	0.0235389	0.0511375					E	20	-0.00525152	0.00151955	0.0616667		0.0150368	0.00836477	0
E	21	Sample X117	8311	9762	9872					E	21	0.00442346	0.0983234	0.105725					E	21	-0.0163309	0.0955839	0.120011		0.00610686	0.0170428	0
E	22	Sample X118	11023	11378	12347					E	22	0.185743	0.211408	0.283989					E	22	0.176505	0.189389	0.294518		0.0262823	0.0147517	0
E	23	Sample X119	8571	8284	8009					E	23	0.0207544	0.00273948	-0.014286					E	23	0	0	0		0	0	0
E	24	Sample X120	8388	8591	8070					E	24	0.00923818	0.0220193	-0.0105291					E	24	0	0	0		0	0	0
F	1	Sample X121	38371	46459	49242					F	1	7.14658	37.0379	-642.871					F	1	6.92573	36.8845	-643.009		-169.973	-81.2419	1
F	2	Sample X122	40386	48743	49418					F	2	9.39163	305.275	-309.444					F	2	9.24826	305.218	-309.548		-153.692	-39.8495	1
F	3	Sample X123	37156	48308	50521					F	3	6.15956	131.83	-74.5272					F	3	5.93871	131.677	-74.6658		-51.5856	-10.0756	1
F	4	Sample X124	36073	48293	48892					F	4	5.43521	129.269	549.234					F	4	5.29185	129.213	549.131		104.98	67.9799	1
F	5	Sample X125	31797	42349	44718					F	5	3.46206	12.8713	21.2412					F	5	3.2412	12.718	21.1026		2.09616	2.23268	1
F	6	Sample X126	28709	42721	46622					F	6	2.55222	13.7729	39.6624					F	6	2.40885	13.7165	39.5587		6.46056	4.64374	1
F	7	Sample X127	32171	43712	44125					F	7	3.59482	16.7844	18.3951					F	7	3.37396	16.6311	18.2566		0.40636	1.86032	1
F	8	Sample X128	21706	36079	40548					F	8	1.24949	5.43889	9.61818					F	8	1.10613	5.3825	9.51448		1.03299	1.05104	0
F	9	Sample X129	25481	37647	43370					F	9	1.85568	6.53317	15.627					F	9	1.63482	6.37984	15.4884		2.27714	1.7317	0
F	10	Sample X130	18083	29840	36461					F	10	0.806569	2.85156	5.68043					F	10	0.663202	2.79517	5.57673		0.69539	0.614191	0
F	11	Sample X131	23480	36182	40588					F	11	1.51209	5.50261	9.67545					F	11	1.29124	5.34928	9.53686		1.0469	1.0307	0
F	12	Sample X132	13935	21081	27620					F	12	0.411589	1.1649	2.29381					F	12	0.268222	1.10851	2.19011		0.270399	0.240236	0
F	13	Sample X133	19605	30192	36818					F	13	0.979376	2.95204	5.91976					F	13	0.758521	2.79871	5.78118		0.745617	0.627832	0
F	14	Sample X134	12208	16153	20107					F	14	0.273343	0.610412	1.04035					F	14	0.129976	0.554021	0.936652		0.0956577	0.100834	0
F	15	Sample X135	15590	22815	28499					F	15	0.55745	1.4095	2.50026					F	15	0.336595	1.25617	2.36167		0.276376	0.253135	0
F	16	Sample X136	11230	12860	14559					F	16	0.20065	0.323987	0.464942					F	16	0.057283	0.267596	0.361239		0.0234108	0.0379946	0
F	17	Sample X137	14007	18539	21678					F	17	0.417648	0.856536	1.24562					F	17	0.196793	0.703206	1.10704		0.100957	0.11378	0
F	18	Sample X138	11134	11008	12405					F	18	0.193716	0.184669	0.288455					F	18	0.0503494	0.128278	0.184753		0.0141186	0.0168004	0
F	19	Sample X139	13289	15275	18428					F	19	0.358315	0.528587	0.844236					F	19	0.13746	0.375258	0.70565		0.0825981	0.0710237	0
F	20	Sample X140	11081	10181	11281					F	20	0.189903	0.126742	0.204348					F	20	0.0465365	0.0703513	0.100645		0.00757347	0.00676359	0
F	21	Sample X141	11699	15695	17273					F	21	0.235035	0.567192	0.721345					F	21	0.0141806	0.413862	0.582759		0.0422243	0.0710723	0
F	22	Sample X142	10533	9872	10766					F	22	0.151094	0.105725	0.167459					F	22	0.00772703	0.0493346	0.0637569		0.00360557	0.00700373	0
F	23	Sample X143	11507	10565	10353					F	23	0.220855	0.15333	0.138586					F	23	0	0	0		0	0	0
F	24	Sample X144	10422	9127	9842					F	24	0.143367	0.0563908	0.103703					F	24	0	0	0		0	0	0
G	1	Sample X145	23999	34053	38569					G	1	1.59594	4.36315	7.32905					G	1	1.45736	4.2673	7.23695		0.742412	0.72245	0
G	2	Sample X146	36320	44886	45737					G	2	5.58959	22.1938	28.4901					G	2	5.42256	22.0993	28.4163		1.57925	2.87422	1
G	3	Sample X147	22374	31923	36991					G	3	1.34428	3.50614	6.04083					G	3	1.20569	3.4103	5.94873		0.634608	0.592879	0
G	4	Sample X148	35435	46356	47808					G	4	5.06232	35.5414	79.0116					G	4	4.89528	35.4468	78.9378		10.8727	9.25531	1
G	5	Sample X149	21452	30599	35137					G	5	1.21465	3.07299	4.89983					G	5	1.07607	2.97714	4.80774		0.457648	0.466458	0
G	6	Sample X150	28173	40496	43551					G	6	2.42167	9.54453	16.2217					G	6	2.25463	9.45003	16.1479		1.67448	1.73666	0
G	7	Sample X151	21078	29621	34294					G	7	1.16451	2.79088	4.47566					G	7	1.02592	2.69504	4.38357		0.422132	0.419706	0
G	8	Sample X152	22025	34549	37638					G	8	1.29417	4.59878	6.52604					G	8	1.12714	4.50428	6.45224		0.486992	0.665638	0
G	9	Sample X153	19487	28787	34214					G	9	0.965342	2.57179	4.43791					G	9	0.826756	2.47595	4.34581		0.467466	0.439882	0
G	10	Sample X154	17779	29107	35060					G	10	0.774067	2.65369	4.85897					G	10	0.607031	2.55919	4.78518		0.556498	0.522269	0
G	11	Sample X155	18141	26658	33340					G	11	0.812843	2.08642	4.05044					G	11	0.674257	1.99058	3.95835		0.491942	0.410511	0
G	12	Sample X156	14078	23215	29084					G	12	0.423648	1.47058	2.64772					G	12	0.256612	1.37607	2.57392		0.299463	0.289664	0
G	13	Sample X157	16582	25325	30248					G	13	0.652	1.82681	2.96837					G	13	0.513414	1.73097	2.87627		0.286326	0.295357	0
G	14	Sample X158	12663	16486	21121					G	14	0.308494	0.642598	1.1702					G	14	0.141458	0.548094	1.09641		0.137079	0.119369	0
G	15	Sample X159	15062	21093	25602					G	15	0.509374	1.16649	1.87833					G	15	0.370788	1.07065	1.78623		0.178896	0.176931	0
G	16	Sample X160	11798	13086	15906					G	16	0.242404	0.341969	0.586955					G	16	0.0753689	0.247465	0.513162		0.0664242	0.0547241	0
G	17	Sample X161	13593	17020	20441					G	17	0.383144	0.695608	1.08211					G	17	0.244558	0.599765	0.990012		0.0975617	0.0931818	0
G	18	Sample X162	11236	10559	12105					G	18	0.201084	0.15291	0.265506					G	18	0.034049	0.0584062	0.191713		0.0333268	0.0197081	0
G	19	Sample X163	12417	14273	16345					G	19	0.289381	0.440251	0.62889					G	19	0.150795	0.344408	0.536792		0.0480959	0.0482496	0
G	20	Sample X164	11020	9329	10955					G	20	0.185528	0.0695847	0.180881					G	20	0.0184926	-0.0249195	0.107088		0.033002	0.0110745	0
G	21	Sample X165	11434	12629	13688					G	21	0.215501	0.305837	0.39099					G	21	0.0769152	0.209994	0.298892		0.0222246	0.0277471	0
G	22	Sample X166	10279	9351	10104					G	22	0.133477	0.0710297	0.121474					G	22	-0.033558	-0.0234744	0.0476808		0.0177888	0.0101549	0
G	23	Sample X167	10353	9725	9669					G	23	0.138586	0.095843	0.0920976					G	23	0	0	0		0	0	0
G	24	Sample X168	10760	9705	9393					G	24	0.167035	0.0945041	0.0737929					G	24	0	0	0		0	0	0
H	1	Sample X169	37666	44767	47440					H	1	6.54828	21.5114	60.7122					H	1	6.43823	21.3937	60.6172		9.80587	6.77237	1
H	2	Sample X170	45316	50700	50525					H	2	25.0194	-66.5731	-74.328					H	2	24.9144	-66.6404	-74.3794		-1.93473	-12.4117	1
H	3	Sample X171	35968	44504	47077					H	3	5.37135	20.1291	49.2491					H	3	5.2613	20.0113	49.1541		7.28569	5.4866	1
H	4	Sample X172	41610	48235	48644					H	4	11.3467	120.222	235.381					H	4	11.2417	120.154	235.33		28.7939	28.011	1
H	5	Sample X173	32683	41454	44279					H	5	3.78638	11.0626	19.0667					H	5	3.67633	10.9449	18.9716		2.00668	1.91191	1
H	6	Sample X174	34665	44342	45204					H	6	4.65623	19.354	24.2231					H	6	4.55124	19.2866	24.1717		1.22126	2.45255	1
H	7	Sample X175	31102	42251	47354					H	7	3.23003	12.6502	57.5606					H	7	3.11998	12.5324	57.4655		11.2333	6.7932	1
H	8	Sample X176	27126	39247	40769					H	8	2.18504	8.00954	9.94148					H	8	2.08006	7.94218	9.89009		0.486976	0.976253	0
H	9	Sample X177	28187	38216	45309					H	9	2.42499	7.00838	24.9682					H	9	2.31494	6.89066	24.8732		4.49564	2.81978	0
H	10	Sample X178	21580	35300	40587					H	10	1.23213	4.98784	9.67401					H	10	1.12715	4.92048	9.62262		1.17553	1.06193	0
H	11	Sample X179	24034	36384	40723					H	11	1.60172	5.63057	9.87278					H	11	1.49167	5.51285	9.77774		1.06622	1.03576	0
H	12	Sample X180	16088	25952	31144					H	12	0.604205	1.9452	3.24354					H	12	0.499221	1.87784	3.19215		0.328576	0.336615	0
H	13	Sample X181	20549	32122	36478					H	13	1.09582	3.57709	5.69152					H	13	0.98577	3.45937	5.59648		0.534278	0.576339	0
H	14	Sample X182	13796	20240	25187					H	14	0.399961	1.05687	1.80159					H	14	0.294978	0.989511	1.75019		0.190171	0.181902	0
H	15	Sample X183	16846	25925	30404					H	15	0.678142	1.93997	3.01438					H	15	0.568091	1.82224	2.91934		0.274275	0.293906	0
H	16	Sample X184	11490	15498	18979					H	16	0.219606	0.548964	0.906185					H	16	0.114623	0.48161	0.854788		0.0932946	0.0925206	0
H	17	Sample X185	15311	21751	25932					H	17	0.531859	1.25573	1.94132					H	17	0.421808	1.13801	1.84628		0.177068	0.178059	0
H	18	Sample X186	11252	12427	14517					H	18	0.202244	0.290153	0.46129					H	18	0.0972605	0.222799	0.409894		0.0467739	0.0390792	0
H	19	Sample X187	13013	16677	19132					H	19	0.336136	0.661358	0.923791					H	19	0.226085	0.543635	0.828751		0.0712791	0.0753333	0
H	20	Sample X188	10582	11165	12365					H	20	0.154519	0.195951	0.285374					H	20	0.0495359	0.128597	0.233977		0.0263451	0.0230552	0
H	21	Sample X189	11893	13820	15233					H	21	0.249512	0.401963	0.52478					H	21	0.139461	0.284239	0.42974		0.0363753	0.0362849	0
H	22	Sample X190	10067	9870	10420					H	22	0.11895	0.10559	0.143228					H	22	0.0139663	0.0382359	0.0918317		0.013399	0.00973318	0
H	23	Sample X191	9936	10049	9713					H	23	0.110051	0.117723	0.0950395					H	23	0	0	0		0	0	0
H	24	Sample X192	9861	9295	9050					H	24	0.104983	0.0673545	0.0513965					H	24	0	0	0		0	0	0
I	1	Sample X193	17758	23860	29633					I	1	0.771845	1.57315	2.79417					I	1	0.710375	1.51024	2.73139		0.305288	0.252627	0
I	2	Sample X194	17560	26421	31650					I	2	0.751041	2.03803	3.41144					I	2	0.69426	1.99515	3.36069		0.341385	0.333304	0
I	3	Sample X195	17153	23468	29286					I	3	0.709087	1.5102	2.70066					I	3	0.647617	1.44729	2.63788		0.297649	0.248783	0
I	4	Sample X196	16750	25195	30775					I	4	0.668586	1.80304	3.12695					I	4	0.611806	1.76016	3.07621		0.32901	0.30805	0
I	5	Sample X197	15638	21405	27049					I	5	0.561896	1.20828	2.16853					I	5	0.500426	1.14537	2.10575		0.240095	0.200666	0
I	6	Sample X198	13352	19608	24889					I	6	0.363426	0.979734	1.74811					I	6	0.306645	0.936855	1.69736		0.190126	0.173839	0
I	7	Sample X199	15482	21750	25575					I	7	0.547493	1.25559	1.87326					I	7	0.486024	1.19269	1.81048		0.154448	0.165557	0
I	8	Sample X200	11920	15153	18555					I	8	0.251539	0.517553	0.858316					I	8	0.194759	0.474674	0.807567		0.0832233	0.076601	0
I	9	Sample X201	14471	19886	23870					I	9	0.457301	1.01325	1.57478					I	9	0.395832	0.950345	1.512		0.140415	0.139522	0
I	10	Sample X202	10869	13357	15882					I	10	0.174758	0.363832	0.584694					I	10	0.117977	0.320953	0.533945		0.053248	0.051996	0
I	11	Sample X203	14057	18879	22336					I	11	0.421871	0.894774	1.33876					I	11	0.360401	0.831868	1.27599		0.11103	0.114448	0
I	12	Sample X204	10240	10682	11770					I	12	0.130793	0.161537	0.240316					I	12	0.0740123	0.118657	0.189567		0.0177275	0.0144443	0
I	13	Sample X205	12539	16226	19740					I	13	0.298828	0.617412	0.995569					I	13	0.237358	0.554506	0.932794		0.0945721	0.0869295	0
I	14	Sample X206	9651	9594	10156					I	14	0.090896	0.0870982	0.125029					I	14	0.0341153	0.0442189	0.07428		0.00751529	0.00502059	0
I	15	Sample X207	11320	13631	16042					I	15	0.207182	0.386277	0.599827					I	15	0.145713	0.323372	0.537052		0.0534201	0.0489174	0
I	16	Sample X208	9626	8942	9184					I	16	0.089229	0.0444237	0.0601003					I	16	0.0324482	0.0015444	0.00935101		0.00195165	-0.00288715	0
I	17	Sample X209	10318	12048	13134					I	17	0.136167	0.261188	0.345818					I	17	0.0746978	0.198282	0.283043		0.02119	0.0260431	0
I	18	Sample X210	9652	8954	8890					I	18	0.0909628	0.0451966	0.0410799					I	18	0.034182	0.00231729	-0.00966938		-0.00299667	-0.00548143	0
I	19	Sample X211	10438	10372	11300					I	19	0.144478	0.139901	0.205728					I	19	0.0830084	0.0769951	0.142953		0.0164894	0.00749305	0
I	20	Sample X212	9822	8836	9054					I	20	0.102356	0.0376165	0.0516554					I	20	0.045575	-0.0052628	0.000906173		0.00154224	-0.0055836	0
I	21	Sample X213	10012	10016	10218					I	21	0.115206	0.115478	0.129281					I	21	0.0537367	0.0525725	0.066506		0.00348337	0.00159616	0
I	22	Sample X214	9337	8624	8779					I	22	0.07011	0.0241092	0.0339709					I	22	0.0133292	-0.0187702	-0.0167784		0.00049795	-0.00376345	0
I	23	Sample X215	9205	9227	9225					I	23	0.0614696	0.0629057	0.0627751					I	23	0	0	0		0	0	0
I	24	Sample X216	9133	8918	9040					I	24	0.0567807	0.0428793	0.0507493					I	24	0	0	0		0	0	0
J	1	Sample X217	14927	18582	22047					J	1	0.49732	0.861325	1.2973					J	1	0.445082	0.848259	1.29437		0.111527	0.106161	0
J	2	Sample X218	10898	12246	13821					J	2	0.176819	0.276246	0.402046					J	2	0.16388	0.284985	0.438157		0.0382931	0.0342847	0
J	3	Sample X219	13139	14753	19314					J	3	0.346219	0.481924	0.944969					J	3	0.293981	0.468859	0.942043		0.118296	0.0810078	0
J	4	Sample X220	10322	10537	12304					J	4	0.136444	0.151373	0.280687					J	4	0.123504	0.160112	0.316799		0.0391716	0.0241619	0
J	5	Sample X221	10507	12341	13872					J	5	0.14928	0.283528	0.406308					J	5	0.0970418	0.270463	0.403381		0.0332296	0.0382924	0
J	6	Sample X222	9515	10495	11471					J	6	0.0818526	0.148444	0.218212					J	6	0.0689129	0.157183	0.254324		0.0242852	0.0231763	0
J	7	Sample X223	11068	13111	14657					J	7	0.18897	0.343972	0.473497					J	7	0.136732	0.330907	0.47057		0.0349158	0.0417299	0
J	8	Sample X224	9701	8968	9738					J	8	0.0942365	0.0460989	0.0967139					J	8	0.0812968	0.0548381	0.132825		0.0194968	0.00644107	0
J	9	Sample X225	9405	10309	10718					J	9	0.0745835	0.135546	0.164072					J	9	0.0223452	0.122481	0.161145		0.00966612	0.01735	0
J	10	Sample X226	9258	9091	9246					J	10	0.0649319	0.0540534	0.0641472					J	10	0.0519922	0.0627925	0.100259		0.00936652	0.0060333	0
J	11	Sample X227	8631	9421	9641					J	11	0.0245529	0.0756383	0.090229					J	11	-0.0276854	0.0625729	0.0873025		0.00618239	0.0143735	0
J	12	Sample X228	8701	8521	8495					J	12	0.0289987	0.0175976	0.0159591					J	12	0.016059	0.0263367	0.0520705		0.00643344	0.00450144	0
J	13	Sample X229	8825	8859	9239					J	13	0.0369122	0.0390905	0.0636897					J	13	-0.0153261	0.0260251	0.0607632		0.00868451	0.00951116	0
J	14	Sample X230	9160	8443	8162					J	14	0.0585371	0.0126884	-0.00484188					J	14	0.0455973	0.0214276	0.0312695		0.00246048	-0.00179098	0
J	15	Sample X231	8393	8710	8689					J	15	0.00955145	0.0295715	0.0282355					J	15	-0.0426868	0.0165061	0.025309		0.00220074	0.00849948	0
J	16	Sample X232	9306	8268	7874					J	16	0.0680756	0.00174262	-0.0225608					J	16	0.0551359	0.0104818	0.0135506		0.000767208	-0.00519816	0
J	17	Sample X233	12065	12454	12432					J	17	0.262475	0.292239	0.290539					J	17	0.210236	0.279174	0.287613		0.00210968	0.00967204	0
J	18	Sample X234	8953	8208	7657					J	18	0.0451322	-0.00198865	-0.0357487					J	18	0.0321925	0.00675052	0.000362681		-0.00159696	-0.00397872	0
J	19	Sample X235	8703	8271	8351					J	19	0.029126	0.00192948	0.00692234					J	19	-0.0231123	-0.0111359	0.00399586		0.00378294	0.00338852	0
J	20	Sample X236	8680	8088	7946					J	20	0.0276634	-0.00941842	-0.0181543					J	20	0.0147236	-0.000679251	0.0179571		0.00465909	0.000404182	0
J	21	Sample X237	8456	8311	8213					J	21	0.0135053	0.00442346	-0.00167813					J	21	-0.038733	-0.00864193	-0.00460461		0.00100933	0.00426605	0
J	22	Sample X238	9162	8128	7917					J	22	0.0586673	-0.00694667	-0.019931					J	22	0.0457275	0.0017925	0.0161804		0.00359698	-0.00369339	0
J	23	Sample X239	9063	8449	8287					J	23	0.0522383	0.0130654	0.00292648					J	23	0	0	0		0	0	0
J	24	Sample X240	8447	8099	7651					J	24	0.0129397	-0.00873917	-0.0361114					J	24	0	0	0		0	0	0
K	1	Sample X241	39828	42423	45567					K	1	8.67202	13.0426	26.9885					K	1	8.48176	12.8911	26.8448		3.48841	2.29538	1
K	2	Sample X242	35112	37549	39192					K	2	4.88652	6.45606	7.95086					K	2	4.8208	6.34215	7.83986		0.374428	0.377382	0
K	3	Sample X243	37965	40896	45584					K	3	6.79276	10.1352	27.1321					K	3	6.60249	9.98366	26.9884		4.25118	2.54823	0
K	4	Sample X244	31057	35153	38762					K	4	3.21562	4.90838	7.51365					K	4	3.14991	4.79447	7.40265		0.652047	0.531594	0
K	5	Sample X245	32474	34860	40676					K	5	3.70675	4.75491	9.80336					K	5	3.51649	4.6034	9.65965		1.26406	0.767894	0
K	6	Sample X246	27840	34646	41235					K	6	2.34388	4.64675	10.6829					K	6	2.27816	4.53284	10.5719		1.50976	1.03672	0
K	7	Sample X247	33211	40652	45325					K	7	3.99687	9.76821	25.0855					K	7	3.80661	9.6167	24.9417		3.83126	2.64189	0
K	8	Sample X248	25318	31629	39425					K	8	1.82552	3.40428	8.20403					K	8	1.75981	3.29036	8.09303		1.20067	0.791653	0
K	9	Sample X249	27990	38296	42933					K	9	2.37862	7.07921	14.3355					K	9	2.18835	6.9277	14.1918		1.81602	1.50043	0
K	10	Sample X250	22449	32855	38036					K	10	1.35522	3.85344	6.85276					K	10	1.2895	3.73953	6.74176		0.750558	0.681532	0
K	11	Sample X251	25402	34251	39741					K	11	1.84101	4.45532	8.56757					K	11	1.65075	4.30381	8.42386		1.03001	0.846638	0
K	12	Sample X252	20826	28484	34466					K	12	1.13147	2.49659	4.55823					K	12	1.06575	2.38267	4.44724		0.51614	0.422686	0
K	13	Sample X253	21091	30392	35561					K	13	1.16623	3.01081	5.13317					K	13	0.975965	2.8593	4.98946		0.532539	0.501687	0
K	14	Sample X254	18288	26557	32409					K	14	0.828849	2.06567	3.6824					K	14	0.763132	1.95176	3.5714		0.40491	0.351033	0
K	15	Sample X255	17896	23604	27934					K	15	0.786501	1.53182	2.36559					K	15	0.596238	1.3803	2.22188		0.210393	0.203205	0
K	16	Sample X256	16073	20174	25263					K	16	0.602776	1.04865	1.81544					K	16	0.537059	0.934737	1.70444		0.192427	0.145923	0
K	17	Sample X257	15154	19371	22369					K	17	0.517643	0.951656	1.34355					K	17	0.32738	0.800143	1.19984		0.0999242	0.109057	0
K	18	Sample X258	12566	15963	20381					K	18	0.300927	0.592337	1.07454					K	18	0.23521	0.478421	0.963538		0.121279	0.091041	0
K	19	Sample X259	13213	15297	17242					K	19	0.352174	0.530586	0.718169					K	19	0.161911	0.379073	0.574455		0.0488456	0.051568	0
K	20	Sample X260	12016	13851	16307					K	20	0.25877	0.404551	0.625215					K	20	0.193053	0.290636	0.514216		0.0558951	0.0401454	0
K	21	Sample X261	13193	13902	14666					K	21	0.350562	0.40882	0.474285					K	21	0.160299	0.257307	0.330571		0.0183159	0.0212839	0
K	22	Sample X262	12642	11859	13623					K	22	0.306852	0.246964	0.385617					K	22	0.241135	0.133049	0.274618		0.0353922	0.00418534	0
K	23	Sample X263	11086	10539	10427					K	23	0.190263	0.151513	0.143714					K	23	0	0	0		0	0	0
K	24	Sample X264	9270	9993	9950					K	24	0.0657172	0.113916	0.110999					K	24	0	0	0		0	0	0
L	1	Sample X265	30093	33415	36662					L	1	2.9234	4.082	5.81349					L	1	2.78544	3.97113	5.71845		0.436828	0.366626	0
L	2	Sample X266	30477	35601	38893					L	2	3.03618	5.15594	7.64294					L	2	2.89883	5.05701	7.59044		0.633357	0.586451	0
L	3	Sample X267	25064	28286	34237					L	3	1.77935	2.44863	4.44872					L	3	1.64139	2.33777	4.35368		0.503979	0.339037	0
L	4	Sample X268	27637	34798	39554					L	4	2.29764	4.72324	8.34952					L	4	2.1603	4.62431	8.29703		0.918178	0.76709	0
L	5	Sample X269	19474	21404	25764					L	5	0.963803	1.20814	1.90903					L	5	0.82584	1.09728	1.81399		0.179178	0.123519	0
L	6	Sample X270	25887	34441	38345					L	6	1.93263	4.54611	7.12312					L	6	1.79528	4.44718	7.07062		0.65586	0.659417	0
L	7	Sample X271	19477	25508	29473					L	7	0.964158	1.86071	2.75064					L	7	0.826195	1.74985	2.6556		0.226438	0.228676	0
L	8	Sample X272	20995	29796	37014					L	8	1.15356	2.83926	6.05718					L	8	1.01622	2.74033	6.00468		0.816089	0.623558	0
L	9	Sample X273	14319	18218	20532					L	9	0.444195	0.821208	1.09366					L	9	0.306231	0.710344	0.998616		0.072068	0.0865481	0
L	10	Sample X274	20499	30487	36875					L	10	1.08946	3.03917	5.95927					L	10	0.952119	2.94025	5.90677		0.741631	0.619332	0
L	11	Sample X275	13182	15209	16452					L	11	0.349676	0.522608	0.639282					L	11	0.211713	0.411744	0.544242		0.0331244	0.0415662	0
L	12	Sample X276	17535	27086	32203					L	12	0.748432	2.17645	3.60645					L	12	0.611091	2.07752	3.55395		0.369107	0.367857	0
L	13	Sample X277	12130	12384	12970					L	13	0.267405	0.286837	0.332711					L	13	0.129441	0.175973	0.237672		0.0154247	0.0135288	0
L	14	Sample X278	17072	25479	29771					L	14	0.700865	1.85531	2.83229					L	14	0.563523	1.75638	2.7798		0.255854	0.277034	0
L	15	Sample X279	11369	10894	11523					L	15	0.210752	0.176535	0.222031					L	15	0.0727881	0.0656711	0.126992		0.0153301	0.00677543	0
L	16	Sample X280	15569	21403	25588					L	16	0.555509	1.20801	1.8757					L	16	0.418167	1.10908	1.8232		0.17853	0.175629	0
L	17	Sample X281	11774	10996	10679					L	17	0.240614	0.183811	0.161325					L	17	0.102651	0.0729468	0.066286		-0.0016652	-0.00454559	0
L	18	Sample X282	13896	17315	21386					L	18	0.408317	0.725657	1.20571					L	18	0.270976	0.62673	1.15321		0.13162	0.110279	0
L	19	Sample X283	11689	10334	10437					L	19	0.234293	0.137272	0.144409					L	19	0.0963296	0.0264087	0.0493691		0.00574008	-0.00587007	0
L	20	Sample X284	12521	14177	16803					L	20	0.29743	0.432054	0.673855					L	20	0.160088	0.333127	0.621358		0.0720578	0.0576587	0
L	21	Sample X285	10410	10295	10115					L	21	0.142534	0.13458	0.122225					L	21	0.00457061	0.0237166	0.0271856		0.000867234	0.00282687	0
L	22	Sample X286	11200	12113	13828					L	22	0.198479	0.266114	0.40263					L	22	0.0611378	0.167186	0.350133		0.0457367	0.0361244	0
L	23	Sample X287	10344	9948	9713					L	23	0.137964	0.110864	0.0950395					L	23	0	0	0		0	0	0
L	24	Sample X288	10335	9771	9067					L	24	0.137342	0.0989275	0.0524974					L	24	0	0	0		0	0	0
M	1	Sample X289	34167	36412	39160					M	1	4.41592	5.64863	7.91702					M	1	4.28664	5.53315	7.81849		0.571334	0.441482	0
M	2	Sample X290	35380	40301	41974					M	2	5.0318	9.27611	12.058					M	2	4.95332	9.191	11.9853		0.698572	0.878997	0
M	3	Sample X291	32634	36714	41337					M	3	3.76753	5.84861	10.8571					M	3	3.63825	5.73314	10.7586		1.25636	0.890039	0
M	4	Sample X292	33477	39393	44665					M	4	4.10831	8.16854	20.9557					M	4	4.02983	8.08343	20.883		3.19989	2.10664	0
M	5	Sample X293	30621	35666	42248					M	5	3.07968	5.19323	12.6435					M	5	2.95039	5.07776	12.545		1.8668	1.19932	0
M	6	Sample X294	28039	37857	43018					M	6	2.39007	6.70295	14.5721					M	6	2.31159	6.61784	14.4994		1.97038	1.52347	0
M	7	Sample X295	27981	36043	41417					M	7	2.37652	5.41686	10.9969					M	7	2.24724	5.30138	10.8984		1.39926	1.0814	0
M	8	Sample X296	23378	32995	38193					M	8	1.49601	3.90909	6.98821					M	8	1.41754	3.82399	6.91547		0.772871	0.687242	0
M	9	Sample X297	25335	34368	39382					M	9	1.82865	4.51095	8.15639					M	9	1.69937	4.39547	8.05787		0.915598	0.794812	0
M	10	Sample X298	19198	26885	32004					M	10	0.931441	2.13374	3.53482					M	10	0.852964	2.04863	3.46208		0.353361	0.326139	0
M	11	Sample X299	22037	30487	35570					M	11	1.29588	3.03917	5.13828					M	11	1.1666	2.9237	5.03976		0.529015	0.484145	0
M	12	Sample X300	14220	20397	25065					M	12	0.43572	1.07655	1.77953					M	12	0.357243	0.99145	1.70679		0.178836	0.168694	0
M	13	Sample X301	19196	26910	31485					M	13	0.931209	2.13901	3.35563					M	13	0.801928	2.02353	3.2571		0.308394	0.306897	0
M	14	Sample X302	12440	15921	18896					M	14	0.291157	0.588369	0.896708					M	14	0.21268	0.503266	0.823969		0.0801757	0.0764111	0
M	15	Sample X303	16185	22045	25903					M	15	0.613476	1.29701	1.93571					M	15	0.484195	1.18153	1.83719		0.163914	0.169124	0
M	16	Sample X304	10647	12600	14233					M	16	0.159076	0.303575	0.43683					M	16	0.0805989	0.218471	0.364091		0.0364049	0.0354365	0
M	17	Sample X305	13908	17513	20647					M	17	0.409323	0.746141	1.10835					M	17	0.280042	0.630662	1.00983		0.0947913	0.0912232	0
M	18	Sample X306	10326	10935	12016					M	18	0.13672	0.179455	0.25877					M	18	0.0582424	0.094351	0.18603		0.0229198	0.0159735	0
M	19	Sample X307	13223	14838	16579					M	19	0.35298	0.489426	0.651705					M	19	0.223699	0.373948	0.55318		0.0448081	0.0411851	0
M	20	Sample X308	10300	10324	10710					M	20	0.134925	0.136582	0.163508					M	20	0.0564478	0.0514779	0.0907684		0.00982261	0.00429007	0
M	21	Sample X309	11443	12497	13514					M	21	0.21616	0.295568	0.376651					M	21	0.0868791	0.18009	0.278126		0.0245089	0.0239059	0
M	22	Sample X310	10298	9966	10006					M	22	0.134787	0.112084	0.114799					M	22	0.0563099	0.0269799	0.042059		0.00376977	-0.00178136	0
M	23	Sample X311	10218	10016	9765					M	23	0.129281	0.115478	0.0985247					M	23	0	0	0		0	0	0
M	24	Sample X312	9464	9564	9377					M	24	0.0784774	0.0851038	0.0727396					M	24	0	0	0		0	0	0
N	1	Sample X313	32905	34923	37136					N	1	3.87321	4.78737	6.145					N	1	3.75446	4.71206	6.08522		0.34329	0.291345	0
N	2	Sample X314	37970	41333	42891					N	2	6.79696	10.8502	14.221					N	2	6.7964	10.8515	14.2326		0.845283	0.929526	1
N	3	Sample X315	28391	32133	34661					N	3	2.47395	3.58106	4.65423					N	3	2.3552	3.50575	4.59446		0.272176	0.279906	0
N	4	Sample X316	38647	43394	47374					N	4	7.40284	15.7037	58.2652					N	4	7.40228	15.705	58.2768		10.643	6.35932	1
N	5	Sample X317	21590	26379	27697					N	5	1.2335	2.02956	2.31122					N	5	1.11476	1.95425	2.25144		0.0742979	0.142086	0
N	6	Sample X318	29850	39179	41696					N	6	2.85436	7.93708	11.5084					N	6	2.8538	7.93839	11.5201		0.89542	1.08328	0
N	7	Sample X319	20611	24117	27239					N	7	1.10374	1.61549	2.20949					N	7	0.984994	1.54019	2.14972		0.152382	0.14559	0
N	8	Sample X320	23348	31848	36257					N	8	1.49131	3.47982	5.54965					N	8	1.49075	3.48113	5.56129		0.52004	0.508818	0
N	9	Sample X321	15139	17610	19810					N	9	0.516292	0.756269	1.00402					N	9	0.397547	0.680961	0.94425		0.0658223	0.0683379	0
N	10	Sample X322	18431	26357	31556					N	10	0.844567	2.02514	3.37952					N	10	0.844007	2.02644	3.39115		0.341178	0.318393	0
N	11	Sample X323	12600	14529	15689					N	11	0.303575	0.462333	0.566634					N	11	0.184829	0.387024	0.506859		0.0299587	0.0402537	0
N	12	Sample X324	14731	20033	24368					N	12	0.479989	1.03123	1.6577					N	12	0.479429	1.03254	1.66934		0.159201	0.148739	0
N	13	Sample X325	11517	12555	13318					N	13	0.22159	0.300071	0.360666					N	13	0.102845	0.224763	0.300891		0.0190321	0.0247558	0
N	14	Sample X326	12126	14756	17332					N	14	0.267101	0.482189	0.727406					N	14	0.266541	0.483494	0.739045		0.0638877	0.059063	0
N	15	Sample X327	10288	10366	10691					N	15	0.134098	0.139485	0.16217					N	15	0.0153526	0.0641769	0.102395		0.00955465	0.0108804	0
N	16	Sample X328	10782	12157	13684					N	16	0.168591	0.269458	0.390659					N	16	0.168031	0.270763	0.402298		0.0328837	0.0292834	0
N	17	Sample X329	9956	9630	9716					N	17	0.111406	0.0894956	0.0952403					N	17	-0.00733934	0.014187	0.0354659		0.00531973	0.00535065	0
N	18	Sample X330	10138	10686	11754					N	18	0.123797	0.161818	0.239124					N	18	0.123238	0.163123	0.250763		0.02191	0.0159407	0
N	19	Sample X331	9824	9643	9730					N	19	0.10249	0.0903624	0.0961779					N	19	-0.0162548	0.0150538	0.0364034		0.00533742	0.00658228	0
N	20	Sample X332	10211	9860	10088					N	20	0.1288	0.104916	0.120382					N	20	0.12824	0.106221	0.13202		0.00644981	0.000472505	0
N	21	Sample X333	10059	9209	9270					N	21	0.118404	0.0617306	0.0657172					N	21	-0.000340681	-0.013578	0.00594271		0.00488018	0.000785425	0
N	22	Sample X334	9182	9164	9468					N	22	0.0599699	0.0587975	0.0787418					N	22	0.0594101	0.0601029	0.0903807		0.00756945	0.00387133	0
N	23	Sample X335	10064	9416	9179					N	23	0.118745	0.0753086	0.0597744					N	23	0	0	0		0	0	0
N	24	Sample X336	8249	8219	8052					N	24	0.000559869	-0.0013054	-0.0116389					N	24	0	0	0		0	0	0
O	1	Sample X337	48505	47440	47382	47775.7	44557	24		O	1	177.866	60.7122	58.5516					O	1	177.842	60.6845	58.5231		-0.540346	-14.9149	1
O	2	Sample X338	46179	43707	43785					O	2	33.2179	16.7665	17.0509					O	2	33.2263	16.7909	17.0835		0.0731372	-2.01786	1
O	3	Sample X339	47455	44848	44998	45767	40897.3	12		O	3	61.2961	21.9717	22.8724					O	3	61.2721	21.944	22.8439		0.224975	-4.80352	1
O	4	Sample X340	41835	40234	40623					O	4	11.778	9.18661	9.726					O	4	11.7864	9.21106	9.75861		0.136885	-0.253473	0
O	5	Sample X341	41850	39386	38558	39931.3	35029.3	6		O	5	11.8077	8.1608	7.31873					O	5	11.7837	8.13308	7.29018		-0.210724	-0.561687	0
O	6	Sample X342	36596	34453	34039					O	6	5.76932	4.55193	4.35672					O	6	5.77775	4.57638	4.38932		-0.0467639	-0.173554	0
O	7	Sample X343	34627	32764	32275	33222	28544	3		O	7	4.63731	3.81778	3.63278					O	7	4.61332	3.79006	3.60423		-0.0464571	-0.126137	0
O	8	Sample X344	28771	28326	28535					O	8	2.56777	2.45825	2.50909					O	8	2.5762	2.4827	2.54169		0.0147485	-0.00431275	0
O	9	Sample X345	25809	24678	24425	24970.7	22351.3	1.5		O	9	1.91763	1.71103	1.66741					O	9	1.89365	1.6833	1.63885		-0.0111122	-0.0318499	0
O	10	Sample X346	22683	22096	22275					O	10	1.38975	1.30426	1.32993					O	10	1.39818	1.32872	1.36254		0.00845482	-0.00445551	0
O	11	Sample X347	18860	18048	18208	18372	16912	0.75		O	11	0.892614	0.802795	0.820119					O	11	0.868632	0.775068	0.791566		0.00412453	-0.00963325	0
O	12	Sample X348	16988	17013	16735					O	12	0.692382	0.694902	0.667098					O	12	0.700812	0.719355	0.6997		-0.00491391	-0.000139079	0
O	13	Sample X349	14438	14076	13988	14167.3	13326	0.375		O	13	0.454446	0.423478	0.416047					O	13	0.430464	0.395752	0.387494		-0.00206451	-0.00537127	0
O	14	Sample X350	13861	12793	13324					O	14	0.405387	0.318699	0.361152					O	14	0.413818	0.343152	0.393753		0.0126503	-0.00250805	0
O	15	Sample X351	11989	11550	11398	11645.7	10558	0.1875		O	15	0.256732	0.224018	0.212869					O	15	0.23275	0.196291	0.184315		-0.00299398	-0.00605433	0
O	16	Sample X352	10328	10617	10729					O	16	0.136858	0.156971	0.164847					O	16	0.145288	0.181424	0.197448		0.00400601	0.00652002	0
O	17	Sample X353	10564	10291	10036	10297	9470	0.09375		O	17	0.15326	0.134305	0.116838					O	17	0.129278	0.106578	0.088285		-0.00457317	-0.00512407	0
O	18	Sample X354	10002	9119	9289					O	18	0.114527	0.055871	0.0669614					O	18	0.122957	0.0803243	0.0995625		0.00480955	-0.00292433	0
O	19	Sample X355	9527	9165	9055	9249	8730	0.046875		O	19	0.0826481	0.0588626	0.0517202					O	19	0.0586657	0.0311357	0.0231667		-0.00199224	-0.00443737	0
O	20	Sample X356	8751	8849	8590					O	20	0.0321838	0.0384495	0.021956					O	20	0.0406141	0.0629027	0.0545571		-0.0020864	0.00174288	0
O	21	Sample X357	9810	9301	9186	9432.33	8371.33	0.0234375		O	21	0.101548	0.0677478	0.0602306					O	21	0.0775659	0.0400209	0.0316772		-0.00208593	-0.00573609	0
O	22	Sample X358	8148	8559	8407					O	22	-0.00570898	0.0199961	0.010429					O	22	0.00272132	0.0444493	0.0430301		-0.000354801	0.0050386	0
O	23	Sample X359	8622	8681	8694	8665.67	7885.33	0		O	23	0.0239824	0.0277269	0.0285535					O	23	0	0	0		0	0	0
O	24	Sample X360	8104	7843	7709					O	24	-0.0084303	-0.0244533	-0.0326011					O	24	0	0	0		0	0	0
									0			#DIV/0!	52782.7
			48505	53545	56298
			8148	8088	7651				0			7962.33	#DIV/0!
									0			#DIV/0!	#DIV/0!
									0			#DIV/0!	#DIV/0!
									0			#DIV/0!	#DIV/0!
									0			#DIV/0!	#DIV/0!
									0			#DIV/0!	#DIV/0!
									0			#DIV/0!	#DIV/0!
[truncated: 12 more columns]
