# Supplementary material for: PDZ-directed substrate recruitment is the primary determinant of specific 4E-BP1 dephosphorylation by PP1-Neurabin
Source: eLife journal article supplement (doi:10.7554/elife.103403), 2024-11-20
Supplement: fig5-data1 [file repli2.xlsx]

## Sheet: All Cycles
Well Row	Well Col	Content							convert to phosphate	Well Row	Well Col	Raw Data (425-10/460-20)	Raw Data (425-10/460-20)	Raw Data (425-10/460-20)				normalize to the lasst column	Well Row	Well Col	Raw Data (425-10/460-20)	Raw Data (425-10/460-20)	Raw Data (425-10/460-20)								PP1-Neb 0.25 nM																PP1-Ph3 2.5 nM
		Time [s]	0	240	480							0	4	8							0	4	8								V1	V2	V3	V4	V5	V6	V7	V8	4ebp-pdz	4ebp-sgs	irsp53-pdz	irsp53-sgs	L5A-PDZ	L5A-SGS			V1	V2	V3
A	1	Sample X1	28050	42697	47184				0.851698	A	1	2.39265	13.7115	52.1718					A	1	0.646479	13.5237	51.9759		9.61305	6.41618	1			400	6.41618	0.151947	0.144588	0.0838937	0.102435	-19.3161	0.604077	5.26139	0.19224	0.0749312	0.429513	0.167085	0.423223	0.109856			-9.38676	0.303805	0.237452
A	2	Sample X2	32719	48352	50587					A	2	3.8003	139.951	-71.3745					A	2	3.62958	139.829	-71.4645		-52.8234	-9.38676	1			200	4.72135	0.155991	0.159108	0.094736	0.105142	-26.285	0.514763	6.20004	0.181803	0.05261	0.3924	0.0793724	0.389184	0.0658555			-6.54519	0.246146	0.196014
A	3	Sample X3	26339	42067	46629					A	3	2.02152	12.2516	39.783					A	3	1.8163	12.0638	39.5871		6.88082	4.72135	1			100	3.06381	0.167101	0.151223	0.085502	0.0969533	3.41277	0.487249	1.48379	0.128999	0.0476347	0.433707	0.126539	0.420571	0.2363			-48.0123	0.136732	0.128991
A	4	Sample X4	29861	48314	51285					A	4	2.85745	132.882	-49.5847					A	4	2.68674	132.76	-49.6747		-45.6087	-6.54519	1			50	1.56626	0.162617	0.141246	0.0915733	0.0897731	6.60143	0.336885	1.0639	0.127882	0.0206159	0.464751	0.0490116	0.51506	0.116587			3.1191	0.0683823	0.0729144
A	5	Sample X5	25210	40515	45484					A	5	1.80577	9.57134	26.3069					A	5	1.60055	9.38352	26.1111		4.18189	3.06381	0			25	1.30773	0.147358	0.120306	0.0820039	0.0866498	2.58722	0.320197	0.835783	0.0990033	0.01658	0.432631	0.0449132	0.400953	0.0325306			1.62534	0.0397821	0.0453669
A	6	Sample X6	24396	46329	49353					A	6	1.66246	35.1676	-382.517					A	6	1.49175	35.0454	-382.607		-104.413	-48.0123	1			12.5	0.911174	0.120605	0.0976887	0.0564647	0.0782718	0.83084	0.374408	0.589986	0.104545	0.00264669	0.425139	-0.00285879	0.41435	0.0282546			0.471962	0.0240835	0.0233511
A	7	Sample X7	23044	38379	42795					A	7	1.44424	7.15382	13.9649					A	7	1.23902	6.966	13.7691		1.70077	1.56626	0			6.25	0.46772	0.0945765	0.0676972	0.0512868	0.0539739	0.58477	0.201177	0.325438	0.0615604	0.00460503	0.332272	0.00857516	0.275171	0.00252835			0.161728	0.0168138	0.0104154
A	8	Sample X8	19907	39982	45431					A	8	1.01581	8.8618	25.888					A	8	0.845095	8.73958	25.7979		4.26459	3.1191	0			3.125	0.331791	0.0695593	0.0527758	0.0266839	0.0410117	0.226984	0.18966	0.225916	0.0430168	0.00286035	0.173274	0.00297258	0.177789	0.00400826			0.0961376	0.0121741	0.00372917
A	9	Sample X9	21701	36608	41796					A	9	1.2488	5.77732	11.7013					A	9	1.04358	5.5895	11.5054		1.47898	1.30773	0			1.5625	0.135719	0.0353426	0.03124	0.0107837	0.0247154	0.0761463	0.0744061	0.134109	0.0185406	0.0011066	0.0881947	-0.000395993	0.0875134	0.00170932			0.0535793	0.000591474	0.000593378
A	10	Sample X10	17515	34882	42680					A	10	0.746349	4.76621	13.6684					A	10	0.575635	4.64399	13.5783		2.23359	1.62534	0			0.78125	0.0747557	0.016234	0.0180219	0.0079412	0.0117022	0.0669112	0.0582386	0.0761396	0.0109807	0.000234099	0.0399555	-0.00083117	0.0436109	0.00120027			0.0214925	0.00922079	0.00291501
A	11	Sample X11	20522	34055	39574					A	11	1.09238	4.36407	8.37243					A	11	0.887164	4.17624	8.17655		1.00008	0.911174	0			0.390625	0.0272774	0.0141403	0.0132944	0.00668348	0.00959913	0.0422895	0.0278721	0.0414394	0.00554126	0.00131075	0.0241651	-0.00389643	0.0200599	-0.00361727			0.0086998	0.00180518	0.00559313
A	12	Sample X12	16213	26656	33939					A	12	0.616163	2.08601	4.31117					A	12	0.445449	1.96378	4.22114		0.56434	0.471962	0			0	0	0	0	0	0	0	0	0	0	0	0	0	0	0			0	0	0
A	13	Sample X13	17256	28709	34244					A	13	0.719603	2.55222	4.45202					A	13	0.514384	2.3644	4.25614		0.472936	0.46772	0
A	14	Sample X14	12813	17935	23614					A	14	0.320275	0.790666	1.53342					A	14	0.149561	0.668441	1.44339		0.193736	0.161728	0				3	27	51	75	99	123	147	171	195	219	243	267	291	315	339		3	27	51
A	15	Sample X15	15947	25290	31120					A	15	0.590824	1.82039	3.23581					A	15	0.385605	1.63257	3.03993		0.351842	0.331791	0				PP1-Neb 0.25 nM																PP1-Ph3 2.5 nM
A	16	Sample X16	13006	16617	19974					A	16	0.335578	0.655441	1.02399					A	16	0.164864	0.533216	0.933965		0.100187	0.0961376	0				V1	V2	V3	V4	V5	V6	V7	V8	4ebp-pdz	4ebp-sgs	irsp53-pdz	irsp53-sgs	L5A-PDZ	L5A-SGS			V1	V2	V3
A	17	Sample X17	13498	18898	23093					A	17	0.375339	0.896936	1.45175					A	17	0.17012	0.709114	1.25587		0.136689	0.135719	0		0	400	na	0.151947	0.144588	0.0838937	0.102435	na	0.604077	na	0.19224	0.0749312	0.429513	0.167085	0.423223	0.109856			na	0.303805	0.237452
A	18	Sample X18	11946	13241	16059					A	18	0.253494	0.354433	0.601443					A	18	0.0827799	0.232208	0.511414		0.0698015	0.0535793	0		2	200	na	0.155991	0.159108	0.094736	0.105142	na	0.514763	na	0.181803	0.05261	0.3924	0.0793724	0.389184	0.0658555			na	0.246146	0.196014
A	19	Sample X19	17975	20756	22642					A	19	0.794949	1.12239	1.38366					A	19	0.58973	0.934571	1.18778		0.0633013	0.0747557	0		4	100	3.06381	0.167101	0.151223	0.085502	0.0969533	na	0.487249	1.48379	0.128999	0.0476347	0.433707	0.126539	0.420571	0.2363			na	0.136732	0.128991
A	20	Sample X20	10090	10683	11383					A	20	0.120518	0.161607	0.211773					A	20	-0.0501958	0.0393818	0.121744		0.0205907	0.0214925	0		6	50	1.56626	0.162617	0.141246	0.0915733	0.0897731	na	0.336885	1.0639	0.127882	0.0206159	0.464751	0.0490116	0.51506	0.116587			3.1191	0.0683823	0.0729144
A	21	Sample X21	13320	14682	15722					A	21	0.360828	0.475687	0.569707					A	21	0.155608	0.287865	0.373828		0.0214905	0.0272774	0		8	25	1.30773	0.147358	0.120306	0.0820039	0.0866498	2.58722	0.320197	0.835783	0.0990033	0.01658	0.432631	0.0449132	0.400953	0.0325306			1.62534	0.0397821	0.0453669
A	22	Sample X22	10831	10430	10674					A	22	0.17206	0.143922	0.160974					A	22	0.00134653	0.0216973	0.0709449		0.0123119	0.0086998	0		10	12.5	0.911174	0.120605	0.0976887	0.0564647	0.0782718	0.83084	0.374408	0.589986	0.104545	0.00264669	0.425139	-0.00285879	0.41435	0.0282546			0.471962	0.0240835	0.0233511
A	23	Sample X23	11293	11052	11164					A	23	0.205219	0.187822	0.195879					A	23	0	0	0		0	0	0		12	6.25	0.46772	0.0945765	0.0676972	0.0512868	0.0539739	0.58477	0.201177	0.325438	0.0615604	0.00460503	0.332272	0.00857516	0.275171	0.00252835			0.161728	0.0168138	0.0104154
A	24	Sample X24	10812	10115	9638					A	24	0.170714	0.122225	0.0900289					A	24	0	0	0		0	0	0		14	3.125	0.331791	0.0695593	0.0527758	0.0266839	0.0410117	0.226984	0.18966	0.225916	0.0430168	0.00286035	0.173274	0.00297258	0.177789	0.00400826			0.0961376	0.0121741	0.00372917
B	1	Sample X25	14963	20412	24795					B	1	0.500525	1.07845	1.73151					B	1	0.440425	1.00083	1.656		0.163794	0.151947	0		16	1.5625	0.135719	0.0353426	0.03124	0.0107837	0.0247154	0.0761463	0.0744061	0.134109	0.0185406	0.0011066	0.0881947	-0.000395993	0.0875134	0.00170932			0.0535793	0.000591474	0.000593378
B	2	Sample X26	14765	24318	29843					B	2	0.482981	1.64923	2.8524					B	2	0.40146	1.58945	2.8319		0.310612	0.303805	0		18	0.78125	0.0747557	0.016234	0.0180219	0.0079412	0.0117022	0.0669112	0.0582386	0.0761396	0.0109807	0.000234099	0.0399555	-0.00083117	0.0436109	0.00120027			0.0214925	0.00922079	0.00291501
B	3	Sample X27	14723	20552	24858					B	3	0.479286	1.0962	1.74262					B	3	0.419185	1.01858	1.66711		0.162132	0.155991	0		20	0.390625	0.0272774	0.0141403	0.0132944	0.00668348	0.00959913	0.0422895	0.0278721	0.0414394	0.00554126	0.00131075	0.0241651	-0.00389643	0.0200599	-0.00361727			0.0086998	0.00180518	0.00559313
B	4	Sample X28	13336	21909	27515					B	4	0.362126	1.27781	2.27028					B	4	0.280605	1.21803	2.24977		0.257936	0.246146	0		22	0	0	0	0	0	na	0	0	0	0	0	0	0	0	0			0	0	0
B	5	Sample X29	14615	21466	25299					B	5	0.469824	1.21656	1.82204					B	5	0.409724	1.13894	1.74653		0.151898	0.167101	0
B	6	Sample X30	11631	17240	21802					B	6	0.229997	0.717965	1.26283					B	6	0.148475	0.65819	1.24233		0.146035	0.136732	0
B	7	Sample X31	14288	20261	24944					B	7	0.441536	1.05949	1.75788					B	7	0.381436	0.981868	1.68237		0.175126	0.162617	0
B	8	Sample X32	10152	13293	16157					B	8	0.124755	0.358639	0.610794					B	8	0.0432341	0.298865	0.590293		0.072857	0.0683823	0
B	9	Sample X33	14438	20183	24315					B	9	0.454446	1.04977	1.64872					B	9	0.394346	0.972152	1.57321		0.150265	0.147358	0
B	10	Sample X34	10895	12616	14198					B	10	0.176606	0.304822	0.433843					B	10	0.0950846	0.245048	0.413342		0.0420735	0.0397821	0
B	11	Sample X35	12855	17861	22093					B	11	0.323591	0.782771	1.30384					B	11	0.263491	0.705153	1.22833		0.130794	0.120605	0
B	12	Sample X36	10388	11352	12199					B	12	0.141009	0.209512	0.272657					B	12	0.0594876	0.149738	0.252155		0.0256044	0.0240835	0
B	13	Sample X37	12935	17971	20597					B	13	0.329929	0.794521	1.10195					B	13	0.269829	0.716902	1.02644		0.0773848	0.0945765	0
B	14	Sample X38	9903	10700	10961					B	14	0.107819	0.162804	0.18131					B	14	0.0262975	0.103029	0.160808		0.0144447	0.0168138	0
B	15	Sample X39	11403	15043	17883					B	15	0.213234	0.507672	0.785115					B	15	0.153134	0.430053	0.709608		0.0698887	0.0695593	0
B	16	Sample X40	9492	10097	10034					B	16	0.0803294	0.120996	0.116702					B	16	-0.00119196	0.0612214	0.0962008		0.00874485	0.0121741	0
B	17	Sample X41	11805	12293	15412					B	17	0.242927	0.279844	0.541074					B	17	0.182827	0.202226	0.465568		0.0658355	0.0353426	0
B	18	Sample X42	10061	9296	9217					B	18	0.118541	0.0674201	0.0622527					B	18	0.0370194	0.00764563	0.0417511		0.00852638	0.000591474	0
B	19	Sample X43	11061	12219	12983					B	19	0.188467	0.274183	0.333746					B	19	0.128367	0.196565	0.258239		0.0154187	0.016234	0
B	20	Sample X44	8333	8424	8536					B	20	0.00579724	0.0114955	0.0185438					B	20	-0.0757241	-0.048279	-0.00195776		0.0115803	0.00922079	0
B	21	Sample X45	10210	11157	11996					B	21	0.128732	0.195374	0.25726					B	21	0.0686314	0.117756	0.181754		0.0159995	0.0141403	0
B	22	Sample X46	9204	8657	8477					B	22	0.0614044	0.0262024	0.014826					B	22	-0.020117	-0.033572	-0.00567557		0.00697412	0.00180518	0
B	23	Sample X47	9184	9451	9419					B	23	0.0601003	0.0776184	0.0755064					B	23	0	0	0		0	0	0
B	24	Sample X48	9510	9179	8567					B	24	0.0815214	0.0597744	0.0205016					B	24	0	0	0		0	0	0
C	1	Sample X49	15767	21058	24815					C	1	0.573907	1.16186	1.73503					C	1	0.501102	1.09798	1.65781		0.139958	0.144588	0
C	2	Sample X50	14198	22422	27690					C	2	0.433843	1.35127	2.30963					C	2	0.397891	1.34598	2.29751		0.237883	0.237452	0
C	3	Sample X51	15280	20977	25213					C	3	0.529041	1.15119	1.80632					C	3	0.456236	1.08731	1.7291		0.160447	0.159108	0
C	4	Sample X52	13232	20372	25706					C	4	0.353707	1.0734	1.89799					C	4	0.317754	1.06811	1.88587		0.20444	0.196014	0
C	5	Sample X53	14059	19804	24241					C	5	0.42204	1.0033	1.63624					C	5	0.349235	0.939413	1.55902		0.154901	0.151223	0
C	6	Sample X54	12376	17689	22026					C	6	0.286221	0.764565	1.29432					C	6	0.250268	0.759267	1.28219		0.130731	0.128991	0
C	7	Sample X55	14080	19613	23768					C	7	0.423817	0.980331	1.5582					C	7	0.351012	0.916445	1.48098		0.141133	0.141246	0
C	8	Sample X56	11647	15061	17935					C	8	0.231181	0.509284	0.790666					C	8	0.195228	0.503987	0.778543		0.0686391	0.0729144	0
C	9	Sample X57	12868	17977	22006					C	9	0.324619	0.795164	1.29148					C	9	0.251814	0.731278	1.21426		0.120746	0.120306	0
C	10	Sample X58	10693	12900	14973					C	10	0.162311	0.327153	0.501417					C	10	0.126358	0.321856	0.489294		0.0418595	0.0453669	0
C	11	Sample X59	11850	16175	20041					C	11	0.246291	0.612518	1.03222					C	11	0.173485	0.548632	0.954995		0.101591	0.0976887	0
C	12	Sample X60	10797	12165	12969					C	12	0.169652	0.270066	0.332632					C	12	0.133699	0.264769	0.320508		0.0139349	0.0233511	0
C	13	Sample X61	12087	15354	18116					C	13	0.264141	0.535775	0.810136					C	13	0.191336	0.47189	0.732913		0.065256	0.0676972	0
C	14	Sample X62	10950	11526	11766					C	14	0.180525	0.222252	0.240018					C	14	0.144572	0.216954	0.227895		0.00273521	0.0104154	0
C	15	Sample X63	11100	13888	16231					C	15	0.191269	0.407647	0.617892					C	15	0.118464	0.343761	0.54067		0.0492271	0.0527758	0
C	16	Sample X64	9823	9830	9912					C	16	0.102423	0.102894	0.108427					C	16	0.0664707	0.0975968	0.0963041		-0.00032317	0.00372917	0
C	17	Sample X65	10373	11863	13728					C	17	0.13997	0.247264	0.394306					C	17	0.0671646	0.183378	0.317084		0.0334265	0.03124	0
C	18	Sample X66	9384	9438	9092					C	18	0.0732003	0.07676	0.0541182					C	18	0.037248	0.0714625	0.041995		-0.00736687	0.000593378	0
C	19	Sample X67	10367	11289	12401					C	19	0.139555	0.204929	0.288147					C	19	0.0667493	0.141043	0.210925		0.0174704	0.0180219	0
C	20	Sample X68	8707	8688	8699					C	20	0.0293805	0.0281719	0.0288715					C	20	-0.0065718	0.0228744	0.0167483		-0.00153153	0.00291501	0
C	21	Sample X69	9639	10346	11233					C	21	0.0900956	0.138102	0.200867					C	21	0.0172902	0.0742162	0.123645		0.0123572	0.0132944	0
C	22	Sample X70	8090	8153	8426					C	22	-0.00929495	-0.00539937	0.011621					C	22	-0.0452473	-0.0106969	-0.000502213		0.00254867	0.00559313	0
C	23	Sample X71	9378	9242	9445					C	23	0.0728054	0.0638857	0.0772222					C	23	0	0	0		0	0	0
C	24	Sample X72	8810	8325	8434					C	24	0.0359523	0.00529751	0.0121232					C	24	0	0	0		0	0	0
D	1	Sample X73	12820	16681	19628					D	1	0.320827	0.661753	0.982124					D	1	0.296274	0.656518	0.967424		0.0777265	0.0838937	0
D	2	Sample X74	11482	16057	19747					D	2	0.219019	0.601253	0.996413					D	2	0.224357	0.638814	1.01487		0.0940149	0.0988147	0
D	3	Sample X75	12782	16911	20312					D	3	0.317832	0.684645	1.06587					D	3	0.293279	0.67941	1.05117		0.0929394	0.094736	0
D	4	Sample X76	10924	14402	17684					D	4	0.178671	0.451337	0.764039					D	4	0.184008	0.488899	0.7825		0.0734003	0.0748114	0
D	5	Sample X77	12699	16793	19656					D	5	0.311312	0.67286	0.985476					D	5	0.28676	0.667625	0.970776		0.0757878	0.085502	0
D	6	Sample X78	9932	12391	14774					D	6	0.10978	0.287376	0.483774					D	6	0.115118	0.324937	0.502235		0.0443245	0.0483897	0
D	7	Sample X79	12795	16871	20117					D	7	0.318856	0.68064	1.04159					D	7	0.294303	0.675405	1.02689		0.0878713	0.0915733	0
D	8	Sample X80	9295	10842	12014					D	8	0.0673545	0.172841	0.258619					D	8	0.072692	0.210402	0.27708		0.0166694	0.0255484	0
D	9	Sample X81	11484	15527	18618					D	9	0.219166	0.551634	0.865344					D	9	0.194613	0.546399	0.850644		0.0760613	0.0820039	0
D	10	Sample X82	9556	9795	10468					D	10	0.0845724	0.10054	0.146564					D	10	0.0899099	0.138101	0.165025		0.00673096	0.00938934	0
D	11	Sample X83	10539	13572	15974					D	11	0.151513	0.381415	0.593378					D	11	0.12696	0.37618	0.578677		0.0506244	0.0564647	0
D	12	Sample X84	9078	9676	9418					D	12	0.0532103	0.0925652	0.0754405					D	12	0.0585478	0.130126	0.0939013		-0.00905625	0.00441919	0
D	13	Sample X85	10574	13109	15557					D	13	0.153959	0.343812	0.554401					D	13	0.129406	0.338577	0.539701		0.0502809	0.0512868	0
D	14	Sample X86	8657	8860	8862					D	14	0.0262024	0.0391546	0.0392829					D	14	0.0315398	0.0767157	0.0577437		-0.004743	0.00327549	0
D	15	Sample X87	10529	12192	13241					D	15	0.150815	0.272123	0.354433					D	15	0.126262	0.266888	0.339733		0.0182113	0.0266839	0
D	16	Sample X88	8767	8730	8536					D	16	0.0332047	0.0308451	0.0185438					D	16	0.0385421	0.0684062	0.0370046		-0.00785039	-0.000192185	0
D	17	Sample X89	9274	9809	10408					D	17	0.065979	0.101481	0.142396					D	17	0.0414261	0.0962459	0.127695		0.00786236	0.0107837	0
D	18	Sample X90	8150	7994	7866					D	18	-0.00558515	-0.0152081	-0.0230494					D	18	-0.000247707	0.022353	-0.00458862		-0.0067354	-0.000542614	0
D	19	Sample X91	9283	9956	10086					D	19	0.0665683	0.111406	0.120245					D	19	0.0420154	0.106171	0.105545		-0.000156431	0.0079412	0
D	20	Sample X92	7788	7264	7274					D	20	-0.0278039	-0.0592845	-0.0586911					D	20	-0.0224665	-0.0217234	-0.0402303		-0.00462672	-0.00222047	1
D	21	Sample X93	8855	8979	9524					D	21	0.0388341	0.0468083	0.0824492					D	21	0.0142812	0.0415733	0.067749		0.00654394	0.00668348	0
D	22	Sample X94	7896	7413	7491					D	22	-0.021216	-0.0504135	-0.0457443					D	22	-0.0158786	-0.0128524	-0.0272835		-0.00360776	-0.00142561	1
D	23	Sample X95	8631	8324	8475					D	23	0.0245529	0.00523506	0.0147002					D	23	0	0	0		0	0	0
D	24	Sample X96	8154	7627	7941					D	24	-0.00533744	-0.0375611	-0.0184608					D	24	0	0	0		0	0	0
E	1	Sample X97	12897	17576	20843					E	1	0.326915	0.752712	1.13368					E	1	0.382933	0.82838	1.20242		0.0935092	0.102435	0
E	2	Sample X98	22985	33533	35675					E	2	1.43523	4.13226	5.19843					E	2	1.51119	4.2158	5.27929		0.265872	0.471013	0
E	3	Sample X99	12615	17326	20839					E	3	0.304744	0.726788	1.13316					E	3	0.360762	0.802456	1.2019		0.09986	0.105142	0
E	4	Sample X100	20957	33420	36400					E	4	1.14857	4.08411	5.64088					E	4	1.22453	4.16766	5.72175		0.388523	0.562153	0
E	5	Sample X101	11956	16545	19918					E	5	0.254246	0.648369	1.01715					E	5	0.310264	0.724037	1.08589		0.0904632	0.0969533	0
E	6	Sample X102	17463	29859	33287					E	6	0.740944	2.85689	4.02833					E	6	0.816904	2.94043	4.10919		0.29219	0.411536	0
E	7	Sample X103	11756	16238	19312					E	7	0.239273	0.618565	0.944735					E	7	0.295291	0.694233	1.01348		0.0798106	0.0897731	0
E	8	Sample X104	15261	26492	30432					E	8	0.527317	2.05242	3.02272					E	8	0.603278	2.13597	3.10359		0.241905	0.312539	0
E	9	Sample X105	11360	15839	18842					E	9	0.210095	0.580652	0.890571					E	9	0.266113	0.65632	0.959311		0.0757478	0.0866498	0
E	10	Sample X106	12560	21016	24968					E	10	0.30046	1.15632	1.76216					E	10	0.37642	1.23987	1.84302		0.150789	0.183325	0
E	11	Sample X107	10872	14934	17914					E	11	0.174971	0.497943	0.788422					E	11	0.230988	0.573611	0.857162		0.0708879	0.0782718	0
E	12	Sample X108	11130	15102	19412					E	12	0.193428	0.512964	0.956481					E	12	0.269389	0.59651	1.03735		0.11021	0.0959949	0
E	13	Sample X109	10239	13336	15507					E	13	0.130724	0.362126	0.549792					E	13	0.186742	0.437794	0.618533		0.0451847	0.0539739	0
E	14	Sample X110	9095	12427	14932					E	14	0.0543129	0.290153	0.497765					E	14	0.130273	0.373699	0.578632		0.0512333	0.0560449	0
E	15	Sample X111	9275	11497	13572					E	15	0.0660445	0.22012	0.381415					E	15	0.122062	0.295788	0.450155		0.0385918	0.0410117	0
E	16	Sample X112	7990	9532	11230					E	16	-0.0154539	0.0829797	0.20065					E	16	0.0605066	0.166526	0.281517		0.0287479	0.0276263	0
E	17	Sample X113	9899	11254	12458					E	17	0.107549	0.202389	0.292549					E	17	0.163566	0.278057	0.361289		0.0208081	0.0247154	0
E	18	Sample X114	8113	8362	8554					E	18	-0.00787414	0.00761039	0.0196802					E	18	0.0680863	0.0911563	0.100547		0.00234777	0.00405763	0
E	19	Sample X115	8216	8774	9478					E	19	-0.00149178	0.0336516	0.0794031					E	19	0.0545256	0.109319	0.148143		0.00970598	0.0117022	0
E	20	Sample X116	6787	6442	6770					E	20	-0.0872631	-0.107109	-0.0882486					E	20	-0.0113027	-0.0235632	-0.00738147		0.00404544	0.00049015	1
E	21	Sample X117	7583	7940	8620					E	21	-0.0402145	-0.0185221	0.0238557					E	21	0.0158029	0.0571457	0.0925959		0.00886256	0.00959913	0
E	22	Sample X118	6915	6617	6913					E	22	-0.0798174	-0.0970826	-0.0799341					E	22	-0.00385691	-0.0135367	0.000933102		0.00361746	0.000598752	1
E	23	Sample X119	7319	6986	7104					E	23	-0.0560173	-0.0756678	-0.0687402					E	23	0	0	0		0	0	1
E	24	Sample X120	6981	6851	6897					E	24	-0.0759605	-0.0835459	-0.0808672					E	24	0	0	0		0	0	1
F	1	Sample X121	36768	47369	49790					F	1	5.88541	58.0875	-148.644					F	1	5.74398	57.9837	-148.785		-51.6922	-19.3161	1
F	2	Sample X122	36341	47427	48956					F	2	5.60299	60.2147	834.021					F	2	5.49199	60.0817	833.912		193.458	103.553	1
F	3	Sample X123	33074	44877	49589					F	3	3.94092	22.1408	-206.339					F	3	3.79949	22.0371	-206.48		-57.1293	-26.285	1
F	4	Sample X124	29655	44625	47674					F	4	2.80021	20.7448	71.2392					F	4	2.68921	20.6117	71.1303		12.6297	8.55514	1
F	5	Sample X125	30091	42766	45914					F	5	2.92283	13.8891	30.2249					F	5	2.7814	13.7854	30.0835		4.07454	3.41277	1
F	6	Sample X126	25396	42280	46058					F	6	1.8399	12.7149	31.7861					F	6	1.7289	12.5819	31.6772		4.77384	3.74354	1
F	7	Sample X127	29872	42712	47298					F	7	2.86054	13.7498	55.6719					F	7	2.71912	13.6461	55.5305		10.4711	6.60143	1
F	8	Sample X128	20391	35982	41136					F	8	1.0758	5.3798	10.5181					F	8	0.964798	5.24674	10.4092		1.29062	1.18055	0
F	9	Sample X129	26605	39869	44982					F	9	2.07551	8.72193	22.7732					F	9	1.93409	8.61816	22.6319		3.50343	2.58722	0
F	10	Sample X130	16041	27418	34267					F	10	0.599732	2.24874	4.46288					F	10	0.488733	2.11567	4.35398		0.559576	0.483155	0
F	11	Sample X131	22281	34782	39217					F	11	1.3308	4.71511	7.97745					F	11	1.18938	4.61134	7.83609		0.806188	0.83084	0
F	12	Sample X132	13758	20655	27261					F	12	0.396799	1.10938	2.21428					F	12	0.285799	0.976315	2.10538		0.282266	0.227447	0
F	13	Sample X133	20882	30538	36667					F	13	1.13876	3.05452	5.81685					F	13	0.997333	2.95075	5.6755		0.681186	0.58477	0
F	14	Sample X134	13184	15682	19608					F	14	0.349837	0.565982	0.979734					F	14	0.238838	0.432918	0.870833		0.109479	0.0789994	0
F	15	Sample X135	17092	23205	28574					F	15	0.702891	1.46903	2.5187					F	15	0.561466	1.36526	2.37734		0.25302	0.226984	0
F	16	Sample X136	11299	13047	14753					F	16	0.205655	0.33885	0.481924					F	16	0.094656	0.205786	0.373024		0.0418095	0.034796	0
F	17	Sample X137	14556	17558	20375					F	17	0.464681	0.750832	1.07378					F	17	0.323256	0.647062	0.932426		0.071341	0.0761463	0
F	18	Sample X138	10766	12380	12483					F	18	0.167459	0.286529	0.294484					F	18	0.0564602	0.153464	0.185583		0.00802963	0.0161404	0
F	19	Sample X139	12264	15383	18141					F	19	0.277623	0.538422	0.812843					F	19	0.136198	0.434653	0.671487		0.0592087	0.0669112	0
F	20	Sample X140	9942	11126	11175					F	20	0.110457	0.19314	0.196673					F	20	-0.000541877	0.060076	0.0877726		0.00692415	0.0110393	0
F	21	Sample X141	12121	14224	16096					F	21	0.266721	0.436062	0.604967					F	21	0.125296	0.332292	0.463612		0.03283	0.0422895	0
F	22	Sample X142	9306	9157	9795					F	22	0.0680756	0.0583418	0.10054					F	22	-0.0429236	-0.0747223	-0.00836105		0.0165903	0.00432032	0
F	23	Sample X143	10394	9843	10393					F	23	0.141425	0.10377	0.141355					F	23	0	0	0		0	0	0
F	24	Sample X144	9950	10273	9919					F	24	0.110999	0.133064	0.108901					F	24	0	0	0		0	0	0
G	1	Sample X145	21904	32120	37083					G	1	1.2771	3.57637	6.10663					G	1	1.17677	3.45353	6.00938		0.638963	0.604077	0
G	2	Sample X146	31104	42936	44766					G	2	3.23067	14.3437	21.5058					G	2	3.21289	14.3379	21.4905		1.78817	2.28471	1
G	3	Sample X147	21069	30905	35812					G	3	1.16332	3.16749	5.27833					G	3	1.06298	3.04465	5.18108		0.534108	0.514763	0
G	4	Sample X148	28728	42035	44783					G	4	2.55697	12.1844	21.6009					G	4	2.53919	12.1786	21.5857		2.35178	2.38081	1
G	5	Sample X149	21301	29725	35483					G	5	1.19425	2.81952	5.08915					G	5	1.09391	2.69668	4.9919		0.573805	0.487249	0
G	6	Sample X150	24556	38692	42866					G	6	1.68988	7.44591	14.1535					G	6	1.67209	7.44005	14.1383		1.67455	1.55827	0
G	7	Sample X151	19920	28282	32481					G	7	1.01739	2.44767	3.70939					G	7	0.917056	2.32483	3.61214		0.321827	0.336885	0
G	8	Sample X152	19358	32419	36033					G	8	0.950129	3.68613	5.41076					G	8	0.932342	3.68027	5.3955		0.428806	0.557894	0
G	9	Sample X153	18064	25890	31507					G	9	0.804519	1.9332	3.36301					G	9	0.704181	1.81036	3.26576		0.363849	0.320197	0
G	10	Sample X154	16340	28818	33966					G	10	0.628406	2.57961	4.32341					G	10	0.610619	2.57375	4.30814		0.433598	0.462191	0
G	11	Sample X155	17011	25641	32421					G	11	0.6947	1.88568	3.68688					G	11	0.594362	1.76284	3.58963		0.456697	0.374408	0
G	12	Sample X156	12944	20380	26048					G	12	0.330644	1.07441	1.96389					G	12	0.312857	1.06855	1.94862		0.220018	0.204471	0
G	13	Sample X157	15965	22400	27190					G	13	0.592526	1.34807	2.19886					G	13	0.492188	1.22523	2.10161		0.219095	0.201177	0
G	14	Sample X158	11574	16537	21587					G	14	0.225787	0.647586	1.23309					G	14	0.208	0.641726	1.21782		0.144025	0.126228	0
G	15	Sample X159	14693	20932	26185					G	15	0.476652	1.14529	1.99084					G	15	0.376314	1.02245	1.89359		0.217785	0.18966	0
G	16	Sample X160	10677	12771	15989					G	16	0.161185	0.316967	0.594798					G	16	0.143398	0.311107	0.579531		0.0671061	0.0545167	0
G	17	Sample X161	13080	15565	19217					G	17	0.341489	0.555139	0.93365					G	17	0.241151	0.432299	0.836399		0.101025	0.0744061	0
G	18	Sample X162	9484	10600	11839					G	18	0.0798	0.15578	0.245468					G	18	0.0620132	0.14992	0.230201		0.0200703	0.0210235	0
G	19	Sample X163	11452	14408	16861					G	19	0.216819	0.451855	0.679641					G	19	0.116481	0.329015	0.58239		0.0633438	0.0582386	0
G	20	Sample X164	9013	9150	10451					G	20	0.0490034	0.0578863	0.145381					G	20	0.0312167	0.0520266	0.130115		0.0195221	0.0123623	0
G	21	Sample X165	10032	11647	13017					G	21	0.116566	0.231181	0.336455					G	21	0.0162283	0.10834	0.239205		0.0327161	0.0278721	0
G	22	Sample X166	8797	9015	9149					G	22	0.035121	0.0491327	0.0578212					G	22	0.0173343	0.0432729	0.0425547		-0.000179558	0.00315256	0
G	23	Sample X167	9792	10124	9746					G	23	0.100338	0.12284	0.0972502					G	23	0	0	0		0	0	0
G	24	Sample X168	8524	8334	8484					G	24	0.0177868	0.00585972	0.0152665					G	24	0	0	0		0	0	0
H	1	Sample X169	34596	44232	46972					H	1	4.62194	18.8572	46.6695					H	1	4.51797	18.8023	46.6091		6.95169	5.26139	1
H	2	Sample X170	40041	46810	46978					H	2	8.93623	43.1576	46.81					H	2	8.90901	43.0846	46.7949		0.927581	4.73573	1
H	3	Sample X171	32625	44116	47223					H	3	3.76408	18.3572	53.3209					H	3	3.66011	18.3023	53.2604		8.73954	6.20004	1
H	4	Sample X172	35774	46171	46808					H	4	5.256	33.1195	43.1174					H	4	5.22878	33.0465	43.1023		2.51396	4.73419	1
H	5	Sample X173	29242	39940	42998					H	5	2.68904	8.80941	14.5158					H	5	2.58506	8.75451	14.4554		1.42522	1.48379	0
H	6	Sample X174	28935	41408	43672					H	6	2.60935	10.9811	16.6415					H	6	2.58213	10.908	16.6264		1.42961	1.75554	1
H	7	Sample X175	27110	37516	41215					H	7	2.1816	6.43039	10.6493					H	7	2.07763	6.37549	10.5888		1.05334	1.0639	0
H	8	Sample X176	23288	37117	40900					H	8	1.48193	6.1312	10.1414					H	8	1.45471	6.05813	10.1263		1.01704	1.08395	0
H	9	Sample X177	24369	34505	39511					H	9	1.65787	4.57723	8.30059					H	9	1.5539	4.52233	8.24016		0.929458	0.835783	0
H	10	Sample X178	17885	30276	35734					H	10	0.785328	2.97657	5.23264					H	10	0.758109	2.9035	5.21756		0.578514	0.557431	0
H	11	Sample X179	21340	32295	36754					H	11	1.1995	3.64014	5.87584					H	11	1.09552	3.58524	5.81541		0.557543	0.589986	0
H	12	Sample X180	14138	22692	28143					H	12	0.428737	1.39109	2.41456					H	12	0.401518	1.31802	2.39948		0.270365	0.249745	0
H	13	Sample X181	18401	26353	31620					H	13	0.841258	2.02433	3.40121					H	13	0.737285	1.96944	3.34079		0.342838	0.325438	0
H	14	Sample X182	12327	17906	23831					H	14	0.282453	0.787568	1.56842					H	14	0.255234	0.714499	1.55335		0.209712	0.162264	0
H	15	Sample X183	15580	22469	27737					H	15	0.556525	1.35815	2.32031					H	15	0.452553	1.30325	2.25988		0.239158	0.225916	0
H	16	Sample X184	10603	14539	18306					H	16	0.15599	0.463202	0.83082					H	16	0.128771	0.390133	0.815742		0.106402	0.0858713	0
H	17	Sample X185	13672	18519	22878					H	17	0.389666	0.854313	1.419					H	17	0.285694	0.799416	1.35857		0.139788	0.134109	0
H	18	Sample X186	9952	11872	14094					H	18	0.111135	0.247938	0.425003					H	18	0.0839162	0.174869	0.409925		0.058764	0.0407512	0
H	19	Sample X187	11727	14775	18047					H	19	0.237116	0.483862	0.802687					H	19	0.133144	0.428965	0.742261		0.0783238	0.0761396	0
H	20	Sample X188	9405	9524	11330					H	20	0.0745835	0.0824492	0.20791					H	20	0.0473649	0.00938052	0.192832		0.0458629	0.0181834	0
H	21	Sample X189	10398	12600	14149					H	21	0.141702	0.303575	0.429672					H	21	0.03773	0.248678	0.369245		0.030142	0.0414394	0
H	22	Sample X190	8426	9238	9595					H	22	0.011621	0.0636243	0.0871647					H	22	-0.0155976	-0.00944435	0.072087		0.0203828	0.0109606	0
H	23	Sample X191	9846	9104	9189					H	23	0.103972	0.0548969	0.0604262					H	23	0	0	0		0	0	0
H	24	Sample X192	8673	9382	8481					H	24	0.0272186	0.0730687	0.0150777					H	24	0	0	0		0	0	0
I	1	Sample X193	16153	21651	26955					I	1	0.610412	1.2419	2.14852					I	1	0.566374	1.20601	2.10429		0.224572	0.19224	0
I	2	Sample X194	18238	28098	33518					I	2	0.823388	2.40393	4.12583					I	2	0.822268	2.40685	4.14005		0.4333	0.414723	0
I	3	Sample X195	15763	20735	26372					I	3	0.573534	1.11968	2.02815					I	3	0.529496	1.08379	1.98392		0.225033	0.181803	0
I	4	Sample X196	15543	24463	30005					I	4	0.553109	1.6739	2.8982					I	4	0.551989	1.67682	2.91242		0.3089	0.295054	0
I	5	Sample X197	14369	18650	23280					I	5	0.448494	0.868925	1.48068					I	5	0.404456	0.833037	1.43645		0.150854	0.128999	0
I	6	Sample X198	12291	17891	22965					I	6	0.279691	0.785967	1.43218					I	6	0.278571	0.788887	1.44641		0.16438	0.14598	0
I	7	Sample X199	14894	18393	23515					I	7	0.494388	0.840376	1.51764					I	7	0.450351	0.804488	1.47341		0.167231	0.127882	0
I	8	Sample X200	10673	13580	17091					I	8	0.160903	0.382073	0.70279					I	8	0.159783	0.384993	0.717014		0.0830053	0.0696538	0
I	9	Sample X201	13695	17059	21223					I	9	0.39157	0.699549	1.18379					I	9	0.347532	0.663661	1.13956		0.118975	0.0990033	0
I	10	Sample X202	11064	12517	14175					I	10	0.188683	0.297119	0.431884					I	10	0.187563	0.300039	0.446108		0.0365172	0.0323182	0
I	11	Sample X203	12245	15748	20681					I	11	0.276169	0.572132	1.11272					I	11	0.232132	0.536244	1.06849		0.133061	0.104545	0
I	12	Sample X204	10253	10894	12359					I	12	0.131687	0.176535	0.284912					I	12	0.130567	0.179455	0.299137		0.0299205	0.0210712	0
I	13	Sample X205	12997	15022	18276					I	13	0.334861	0.505792	0.827537					I	13	0.290823	0.469904	0.783306		0.0783505	0.0615604	0
I	14	Sample X206	9417	9116	10300					I	14	0.0753745	0.0556761	0.134925					I	14	0.0742545	0.0585959	0.14915		0.0226385	0.0093619	0
I	15	Sample X207	11086	12997	15341					I	15	0.190263	0.334861	0.53459					I	15	0.146225	0.298972	0.49036		0.0478468	0.0430168	0
I	16	Sample X208	8687	9216	9691					I	16	0.0281083	0.0621874	0.0935677					I	16	0.0269884	0.0651072	0.107792		0.0106713	0.0101005	0
I	17	Sample X209	9862	10770	11947					I	17	0.105051	0.167742	0.253569					I	17	0.0610133	0.131854	0.209338		0.0193712	0.0185406	0
I	18	Sample X210	9275	9271	9266					I	18	0.0660445	0.0657826	0.0654554					I	18	0.0649245	0.0687024	0.0796799		0.00274437	0.00184442	0
I	19	Sample X211	9615	10387	10894					I	19	0.0884961	0.14094	0.176535					I	19	0.0444587	0.105051	0.132304		0.00681323	0.0109807	0
I	20	Sample X212	8316	8638	8601					I	20	0.00473555	0.0249968	0.0226522					I	20	0.00361557	0.0279165	0.0368767		0.00224005	0.00415765	0
I	21	Sample X213	9354	9739	10020					I	21	0.0712269	0.096781	0.11575					I	21	0.0271894	0.0608926	0.0715195		0.00265673	0.00554126	0
I	22	Sample X214	8101	8247	8025					I	22	-0.00861563	0.000435432	-0.0133017					I	22	-0.00973562	0.00335519	0.000922826		-0.00060809	0.00133231	0
I	23	Sample X215	8936	8809	8939					I	23	0.0440375	0.0358884	0.0442306					I	23	0	0	0		0	0	0
I	24	Sample X216	8258	8193	8010					I	24	0.00111998	-0.00291975	-0.0142245					I	24	0	0	0		0	0	0
J	1	Sample X217	12616	15724	18914					J	1	0.304822	0.569893	0.898759					J	1	0.335118	0.606609	0.934568		0.0819898	0.0749312	0
J	2	Sample X218	11400	13040	15115					J	2	0.213015	0.338291	0.514132					J	2	0.303753	0.436696	0.613054		0.0440896	0.0386627	0
J	3	Sample X219	12552	14351	17213					J	3	0.299838	0.446945	0.715204					J	3	0.330134	0.48366	0.751014		0.0668383	0.05261	0
J	4	Sample X220	12607	13194	14630					J	4	0.30412	0.350643	0.471135					J	4	0.394858	0.449048	0.570057		0.0302524	0.0218999	0
J	5	Sample X221	12609	14113	16863					J	5	0.304276	0.426614	0.67984					J	5	0.334572	0.46333	0.71565		0.0630799	0.0476347	0
J	6	Sample X222	8989	9407	10710					J	6	0.0474535	0.0747153	0.163508					J	6	0.138191	0.17312	0.26243		0.0223274	0.0155298	0
J	7	Sample X223	10402	10406	12572					J	7	0.141979	0.142257	0.301394					J	7	0.172275	0.178972	0.337203		0.0395576	0.0206159	0
J	8	Sample X224	9034	9091	9892					J	8	0.0503611	0.0540534	0.107076					J	8	0.141099	0.152458	0.205998		0.0133848	0.00811237	0
J	9	Sample X225	9589	9775	11412					J	9	0.0867656	0.099196	0.213892					J	9	0.117061	0.135912	0.249701		0.0284474	0.01658	0
J	10	Sample X226	8619	8413	8462					J	10	0.0237923	0.0108053	0.0138825					J	10	0.11453	0.10921	0.112805		0.000898575	-0.000215675	0
J	11	Sample X227	8838	8950	9081					J	11	0.0377446	0.0449389	0.0534048					J	11	0.0680405	0.0816546	0.089214		0.00188986	0.00264669	0
J	12	Sample X228	8188	7997	8180					J	12	-0.00322997	-0.0150237	-0.00372616					J	12	0.0875079	0.0833814	0.0951961		0.00295367	0.000961024	0
J	13	Sample X229	8595	9146	9084					J	13	0.0222724	0.0576261	0.0535994					J	13	0.0525683	0.0943417	0.0894086		-0.0012333	0.00460503	0
J	14	Sample X230	7066	7769	7815					J	14	-0.0709754	-0.0289594	-0.0261602					J	14	0.0197625	0.0694458	0.072762		0.000829069	0.00662495	0
J	15	Sample X231	8565	8282	8838					J	15	0.0203752	0.00261483	0.0377446					J	15	0.0506711	0.0393305	0.0735538		0.00855584	0.00286035	0
J	16	Sample X232	7891	7813	7264					J	16	-0.0215218	-0.026282	-0.0592845					J	16	0.0692161	0.0721231	0.0396377		-0.00812134	-0.00369729	0
J	17	Sample X233	7719	7669	7774					J	17	-0.0319949	-0.0350231	-0.0286554					J	17	-0.00169898	0.00169259	0.00715379		0.0013653	0.0011066	0
J	18	Sample X234	7079	6961	6947					J	18	-0.0702112	-0.0771305	-0.0779489					J	18	0.0205267	0.0212746	0.0209733		-7.53151e-05	5.58362e-05	1
J	19	Sample X235	8456	8337	8398					J	19	0.0135053	0.00604717	0.00986481					J	19	0.0438012	0.0427628	0.045674		0.000727792	0.000234099	0
J	20	Sample X236	5864	6765	6658					J	20	-0.139648	-0.0885383	-0.0947216					J	20	-0.0489104	0.00986678	0.00420062		-0.00141654	0.00663888	1
J	21	Sample X237	7428	7575	7511					J	21	-0.0495169	-0.0406963	-0.0445443					J	21	-0.0192211	-0.00398065	-0.00873506		-0.0011886	0.00131075	0
J	22	Sample X238	6736	6815	6578					J	22	-0.0902173	-0.0856382	-0.0993243					J	22	0.000520578	0.0127669	-0.000402041		-0.00329223	-0.000115327	1
J	23	Sample X239	7747	7641	7656					J	23	-0.0302959	-0.0367157	-0.0358092					J	23	0	0	0		0	0	0
J	24	Sample X240	6727	6594	6585					J	24	-0.0907378	-0.0984051	-0.0989222					J	24	0	0	0		0	0	1
K	1	Sample X241	37909	39880	40934					K	1	6.74597	8.73539	10.1943					K	1	6.72199	8.72553	10.1581		0.358141	0.429513	0
K	2	Sample X242	34782	37242	39119					K	2	4.71511	6.22276	7.87397					K	2	4.66888	6.1965	7.8231		0.406649	0.394276	0
K	3	Sample X243	33519	36970	38514					K	3	4.12626	6.02595	7.27768					K	3	4.10227	6.01608	7.24147		0.306348	0.3924	0
K	4	Sample X244	30576	35286	38532					K	4	3.06601	4.9802	7.29443					K	4	3.01978	4.95393	7.24355		0.572406	0.527972	0
K	5	Sample X245	30690	35491	37709					K	5	3.10076	5.09364	6.58265					K	5	3.07678	5.08378	6.54644		0.365664	0.433707	0
K	6	Sample X246	28023	34813	39692					K	6	2.38632	4.73088	8.5096					K	6	2.3401	4.70461	8.45872		0.938526	0.764828	0
K	7	Sample X247	27713	34254	36997					K	7	2.31485	4.45674	6.04509					K	7	2.29087	4.44687	6.00888		0.390502	0.464751	0
K	8	Sample X248	22488	31431	36375					K	8	1.36093	3.33759	5.62479					K	8	1.3147	3.31132	5.57391		0.565645	0.5324	0
K	9	Sample X249	24818	32527	35693					K	9	1.73556	3.72676	5.20883					K	9	1.71158	3.71689	5.17262		0.363933	0.432631	0
K	10	Sample X250	20380	30286	35552					K	10	1.07441	2.97951	5.12807					K	10	1.02818	2.95324	5.07719		0.530987	0.506126	0
K	11	Sample X251	21524	30122	34628					K	11	1.22447	2.93176	4.6378					K	11	1.20048	2.92189	4.60159		0.419925	0.425139	0
K	12	Sample X252	18502	27743	33671					K	12	0.852426	2.32168	4.19201					K	12	0.806198	2.29541	4.14114		0.461431	0.416867	0
K	13	Sample X253	18873	27072	32087					K	13	0.894091	2.17345	3.56449					K	13	0.870109	2.16358	3.52828		0.341174	0.332272	0
K	14	Sample X254	16409	25325	31497					K	14	0.635097	1.82681	3.35965					K	14	0.588869	1.80055	3.30877		0.377057	0.339988	0
K	15	Sample X255	16308	21937	26350					K	15	0.625312	1.28174	2.02373					K	15	0.601329	1.27188	1.98752		0.178911	0.173274	0
K	16	Sample X256	14522	22661	26100					K	16	0.461725	1.38648	1.97408					K	16	0.415497	1.36021	1.9232		0.140748	0.188463	0
K	17	Sample X257	13717	17839	20669					K	17	0.393394	0.780431	1.11118					K	17	0.369411	0.770567	1.07497		0.0761006	0.0881947	0
K	18	Sample X258	13018	18157	22177					K	18	0.336535	0.814577	1.31584					K	18	0.290307	0.788312	1.26496		0.119162	0.121831	0
K	19	Sample X259	12276	14168	16153					K	19	0.278541	0.431288	0.610412					K	19	0.254559	0.421423	0.574203		0.0381951	0.0399555	0
K	20	Sample X260	10776	13767	15938					K	20	0.168166	0.397547	0.589974					K	20	0.121938	0.371281	0.539095		0.0419536	0.0521446	0
K	21	Sample X261	10215	11990	12994					K	21	0.129075	0.256808	0.334622					K	21	0.105093	0.246943	0.298414		0.0128676	0.0241651	0
K	22	Sample X262	9940	11319	12891					K	22	0.110322	0.207109	0.32644					K	22	0.064094	0.180844	0.275561		0.0236795	0.0264334	0
K	23	Sample X263	8622	8398	8814					K	23	0.0239824	0.00986481	0.0362082					K	23	0	0	0		0	0	0
K	24	Sample X264	8970	8658	9042					K	24	0.0462279	0.0262659	0.0508787					K	24	0	0	0		0	0	0
L	1	Sample X265	27845	30108	32454					L	1	2.34503	2.92772	3.69924					L	1	2.24402	2.82301	3.5807		0.189423	0.167085	0
L	2	Sample X266	28137	33546	36271					L	2	2.41314	4.13784	5.55849					L	2	2.38776	4.13573	5.53413		0.349601	0.393296	0
L	3	Sample X267	23880	25604	27328					L	3	1.57641	1.87871	2.22892					L	3	1.4754	1.77399	2.11038		0.0840967	0.0793724	0
L	4	Sample X268	24328	31641	35050					L	4	1.65092	3.40837	4.8537					L	4	1.62554	3.40625	4.82934		0.355771	0.400474	0
L	5	Sample X269	20284	23523	26686					L	5	1.06236	1.51891	2.09221					L	5	0.961351	1.4142	1.97366		0.139867	0.126539	0
L	6	Sample X270	22580	30409	35463					L	6	1.37448	3.01587	5.07795					L	6	1.3491	3.01375	5.05359		0.509959	0.463061	0
L	7	Sample X271	17179	18490	20748					L	7	0.711735	0.851095	1.12136					L	7	0.610725	0.746382	1.00282		0.064109	0.0490116	0
L	8	Sample X272	20280	28921	34743					L	8	1.06186	2.60577	4.69538					L	8	1.03648	2.60365	4.67101		0.51684	0.454316	0
L	9	Sample X273	14184	15756	18110					L	9	0.43265	0.57288	0.809487					L	9	0.33164	0.468166	0.690946		0.055695	0.0449132	0
L	10	Sample X274	19713	28810	32949					L	10	0.992319	2.57759	3.8907					L	10	0.966941	2.57548	3.86634		0.322715	0.362424	0
L	11	Sample X275	12239	12183	12169					L	11	0.275711	0.271437	0.270371					L	11	0.174701	0.166724	0.15183		-0.00372338	-0.00285879	0
L	12	Sample X276	17724	26317	32428					L	12	0.768254	2.01711	3.6895					L	12	0.742876	2.015	3.66514		0.412534	0.365282	0
L	13	Sample X277	10705	10451	11890					L	13	0.163156	0.145381	0.249287					L	13	0.0621455	0.0406679	0.130747		0.0225197	0.00857516	0
L	14	Sample X278	15791	25754	30086					L	14	0.576152	1.90712	2.92139					L	14	0.550775	1.90501	2.89703		0.248005	0.293281	0
L	15	Sample X279	10526	10162	11109					L	15	0.150605	0.12544	0.191916					L	15	0.0495951	0.0207266	0.0733758		0.0131623	0.00297258	0
L	16	Sample X280	13195	20200	25546					L	16	0.350723	1.05188	1.86782					L	16	0.325346	1.04977	1.84346		0.198422	0.189764	0
L	17	Sample X281	10123	10079	10332					L	17	0.122772	0.119768	0.137134					L	17	0.0217615	0.0150541	0.0185936		0.000884864	-0.000395993	0
L	18	Sample X282	11679	16604	19966					L	18	0.233552	0.654162	1.02301					L	18	0.208174	0.652045	0.998652		0.0866515	0.0988097	0
L	19	Sample X283	9700	9335	9862					L	19	0.0941696	0.0699786	0.105051					L	19	-0.00684061	-0.0347349	-0.01349		0.00531124	-0.00083117	0
L	20	Sample X284	11957	14096	15713					L	20	0.254322	0.425173	0.568868					L	20	0.228944	0.423056	0.544505		0.0303623	0.0394451	0
L	21	Sample X285	10181	9910	9981					L	21	0.126742	0.108292	0.113101					L	21	0.0257318	0.0035785	-0.00543961		-0.00225453	-0.00389643	0
L	22	Sample X286	9058	10304	12237					L	22	0.0519144	0.135201	0.275558					L	22	0.0265371	0.133085	0.251195		0.0295276	0.0280823	0
L	23	Sample X287	9802	9857	10061					L	23	0.10101	0.104714	0.118541					L	23	0	0	0		0	0	0
L	24	Sample X288	8644	8274	8628					L	24	0.0253774	0.00211636	0.0243627					L	24	0	0	0		0	0	0
M	1	Sample X289	34141	36453	39026					M	1	4.40381	5.67522	7.77764					M	1	4.30582	5.59111	7.69161		0.525124	0.423223	0
M	2	Sample X290	31198	36601	39215					M	2	3.26101	5.77265	7.97532					M	2	3.23759	5.7455	7.85022		0.52618	0.576578	0
M	3	Sample X291	31351	34504	37493					M	3	3.31107	4.57674	6.41258					M	3	3.21308	4.49263	6.32655		0.45848	0.389184	0
M	4	Sample X292	28961	35416	38511					M	4	2.616	5.05174	7.27489					M	4	2.59259	5.02459	7.14979		0.531301	0.569651	0
M	5	Sample X293	27581	32146	36395					M	5	2.28504	3.58576	5.63766					M	5	2.18706	3.50165	5.55162		0.512493	0.420571	0
M	6	Sample X294	24449	32521	37457					M	6	1.67151	3.72448	6.38486					M	6	1.64809	3.69733	6.25976		0.640607	0.576458	0
M	7	Sample X295	25447	31064	36873					M	7	1.84935	3.21786	5.95788					M	7	1.75137	3.13375	5.87184		0.684523	0.51506	0
M	8	Sample X296	20984	29016	34264					M	8	1.15211	2.63014	4.46146					M	8	1.1287	2.60298	4.33636		0.433345	0.400957	0
M	9	Sample X297	22815	28047	34562					M	9	1.4095	2.39195	4.60517					M	9	1.31151	2.30784	4.51914		0.552825	0.400953	0
M	10	Sample X298	17345	24174	29974					M	10	0.728744	1.625	2.88937					M	10	0.705332	1.59785	2.76428		0.291606	0.257368	0
M	11	Sample X299	20976	28520	34248					M	11	1.15106	2.50541	4.45391					M	11	1.05307	2.4213	4.36787		0.486643	0.41435	0
M	12	Sample X300	13845	19403	24330					M	12	0.40405	0.955421	1.65126					M	12	0.380638	0.928266	1.52616		0.149473	0.14319	0
M	13	Sample X301	17122	22817	29995					M	13	0.705935	1.4098	2.89535					M	13	0.607947	1.32569	2.80931		0.370905	0.275171	0
M	14	Sample X302	11644	15305	19238					M	14	0.230958	0.531313	0.936094					M	14	0.207546	0.504158	0.810996		0.0767096	0.0754313	0
M	15	Sample X303	14880	19556	25735					M	15	0.493146	0.973535	1.9035					M	15	0.395158	0.889427	1.81747		0.232011	0.177789	0
M	16	Sample X304	10580	12743	14729					M	16	0.154379	0.314765	0.479813					M	16	0.130967	0.28761	0.354715		0.0167763	0.0279685	0
M	17	Sample X305	12660	16267	19747					M	17	0.308259	0.621357	0.996413					M	17	0.210271	0.537249	0.910379		0.0932824	0.0875134	0
M	18	Sample X306	11456	10942	12412					M	18	0.217112	0.179954	0.288995					M	18	0.1937	0.152799	0.163898		0.00277468	-0.00372535	0
M	19	Sample X307	11321	14027	15446					M	19	0.207255	0.419336	0.544189					M	19	0.109267	0.335228	0.458154		0.0307316	0.0436109	0
M	20	Sample X308	9784	9900	10262					M	20	0.0998005	0.107616	0.132307					M	20	0.0763883	0.0804611	0.0072089		-0.0183131	-0.00864743	0
M	21	Sample X309	11138	12080	13093					M	21	0.194005	0.263611	0.34253					M	21	0.0960166	0.179503	0.256496		0.0192481	0.0200599	0
M	22	Sample X310	9075	8963	8953					M	22	0.0530159	0.0457766	0.0451322					M	22	0.0296037	0.0186216	-0.0799656		-0.0246468	-0.0136962	0
M	23	Sample X311	9757	9549	9578					M	23	0.0979879	0.0841077	0.0860341					M	23	0	0	0		0	0	0
M	24	Sample X312	8613	8672	10157					M	24	0.0234122	0.027155	0.125098					M	24	0	0	0		0	0	0
N	1	Sample X313	31084	32411	33444					N	1	3.22426	3.68314	4.09428					N	1	3.17513	3.64585	4.05397		0.102031	0.109856	0
N	2	Sample X314	35884	40131	41743					N	2	5.32099	9.05164	11.5984					N	2	5.30968	9.09354	11.6007		0.626779	0.786372	0
N	3	Sample X315	27052	27071	29235					N	3	2.16917	2.17324	2.68719					N	3	2.12004	2.13594	2.64688		0.127736	0.0658555	0
N	4	Sample X316	31972	39008	42017					N	4	3.52346	7.75921	12.1469					N	4	3.51215	7.80111	12.1491		1.08701	1.07962	0
N	5	Sample X317	23246	26326	31489					N	5	1.47539	2.01892	3.35697					N	5	1.42626	1.98162	3.31666		0.33376	0.2363	0
N	6	Sample X318	25794	33369	36948					N	6	1.91476	4.06261	6.01041					N	6	1.90346	4.10451	6.01265		0.477035	0.513649	0
N	7	Sample X319	18912	21584	25301					N	7	0.898531	1.23268	1.8224					N	7	0.849398	1.19538	1.78209		0.146678	0.116587	0
N	8	Sample X320	21977	30233	37314					N	8	1.28738	2.96398	6.27639					N	8	1.27608	3.00588	6.27862		0.818185	0.625318	0
N	9	Sample X321	13900	14754	16664					N	9	0.408653	0.482012	0.660074					N	9	0.35952	0.444716	0.619765		0.0437621	0.0325306	0
N	10	Sample X322	16446	23422	28944					N	10	0.638697	1.50293	2.61165					N	10	0.62739	1.54483	2.61389		0.267263	0.248312	0
N	11	Sample X323	11918	13286	14601					N	11	0.251389	0.358072	0.468602					N	11	0.202256	0.320776	0.428293		0.0268792	0.0282546	0
N	12	Sample X324	13125	18421	22769					N	12	0.345095	0.843463	1.40259					N	12	0.333788	0.885363	1.40483		0.129867	0.13388	0
N	13	Sample X325	10730	10111	10891					N	13	0.164918	0.121952	0.176321					N	13	0.115785	0.0846555	0.136012		0.0128391	0.00252835	0
N	14	Sample X326	11000	14172	18437					N	14	0.184097	0.431628	0.84523					N	14	0.172789	0.473528	0.847467		0.0934846	0.0843347	0
N	15	Sample X327	10362	9481	10695					N	15	0.139209	0.0796015	0.162451					N	15	0.090076	0.0423052	0.122142		0.0199592	0.00400826	0
N	16	Sample X328	10332	12221	13902					N	16	0.137134	0.274336	0.40882					N	16	0.125827	0.316236	0.411057		0.0237054	0.0356538	0
N	17	Sample X329	9807	9445	9879					N	17	0.101346	0.0772222	0.106198					N	17	0.0522138	0.0399258	0.0658884		0.00649064	0.00170932	0
N	18	Sample X330	9757	10102	10905					N	18	0.0979879	0.121337	0.177318					N	18	0.0866807	0.163237	0.179555		0.00407935	0.0116092	0
N	19	Sample X331	9099	8253	9111					N	19	0.0545724	0.000808779	0.0553514					N	19	0.00543976	-0.0364876	0.015042		0.0128824	0.00120027	0
N	20	Sample X332	8447	9396	9698					N	20	0.0129397	0.0739905	0.0940359					N	20	0.00163252	0.115891	0.0962729		-0.00490443	0.01183	0
N	21	Sample X333	10137	9530	9577					N	21	0.123729	0.082847	0.0859676					N	21	0.0745964	0.0455507	0.0456582		2.6878e-05	-0.00361727	0
N	22	Sample X334	8256	8227	8762					N	22	0.000995493	-0.000808264	0.0328856					N	22	-0.0103117	0.0410918	0.0351226		-0.00149231	0.00567929	0
N	23	Sample X335	9015	8831	8878					N	23	0.0491327	0.0372963	0.0403094					N	23	0	0	0		0	0	0
N	24	Sample X336	8421	7555	8204					N	24	0.0113072	-0.0419001	-0.00223701					N	24	0	0	0		0	0	0
O	1	Sample X337	49473	48442	46924	48279.7	46185.3	24		O	1	-266.493	160.052	45.5739					O	1	-266.498	160.044	45.5783		-28.6165	39.0096	1
O	2	Sample X338	47970	46026	44560					O	2	90.9137	31.4265	20.4099					O	2	90.9595	31.4654	20.4281		-2.75932	-8.81643	1
O	3	Sample X339	47840	45867	44375	46027.3	44524	12		O	3	81.1161	29.7456	19.5075					O	3	81.1109	29.7381	19.5119		-2.55656	-7.69988	1
O	4	Sample X340	46497	44504	42571					O	4	37.6201	20.1291	13.3969					O	4	37.6659	20.1679	13.4151		-1.68821	-3.03135	1
O	5	Sample X341	44570	43760	40450	42926.7	36364.3	6		O	5	20.4608	16.9588	9.48012					O	5	20.4556	16.9513	9.48446		-1.86671	-1.37139	1
O	6	Sample X342	37171	36396	35526					O	6	6.17052	5.6383	5.11336					O	6	6.21633	5.67719	5.13151		-0.13642	-0.135602	0
O	7	Sample X343	33417	32151	31688	32418.7	30620.7	3		O	7	4.08284	3.58757	3.42444					O	7	4.07761	3.58008	3.42879		-0.0378233	-0.0811024	0
O	8	Sample X344	32057	30536	29269					O	8	3.55373	3.05392	2.69616					O	8	3.59954	3.09281	2.71432		-0.0946224	-0.110653	0
O	9	Sample X345	24678	23023	22926	23542.3	22995.3	1.5		O	9	1.71103	1.44103	1.42626					O	9	1.70579	1.43354	1.43061		-0.000733361	-0.0343983	0
O	10	Sample X346	22921	23306	22759					O	10	1.4255	1.48474	1.4011					O	10	1.47131	1.52363	1.41925		-0.026094	-0.0065071	0
O	11	Sample X347	18705	18239	18087	18343.7	17007.7	0.75		O	11	0.875098	0.823497	0.807001					O	11	0.869863	0.816011	0.811347		-0.00116608	-0.00731448	0
O	12	Sample X348	17247	17337	16439					O	12	0.718681	0.72792	0.638015					O	12	0.764486	0.766809	0.65617		-0.0276598	-0.0135395	0
O	13	Sample X349	14079	14235	14021	14111.7	13312	0.375		O	13	0.423732	0.437001	0.418829					O	13	0.418497	0.429516	0.423176		-0.00158505	0.000584765	0
O	14	Sample X350	12661	13915	13360					O	14	0.308337	0.40991	0.364076					O	14	0.354142	0.448799	0.38223		-0.0166421	0.0035111	0
O	15	Sample X351	11821	11950	11317	11696	10640	0.1875		O	15	0.244122	0.253795	0.206964					O	15	0.238887	0.24631	0.21131		-0.00874986	-0.0034471	0
O	16	Sample X352	10455	10839	10626					O	16	0.14566	0.172628	0.157602					O	16	0.191464	0.211516	0.175757		-0.00893991	-0.0019634	0
O	17	Sample X353	10616	9757	9681	10018	9221.67	0.09375		O	17	0.156901	0.0979879	0.0928993					O	17	0.151666	0.0905027	0.0972454		0.00168569	-0.00680256	0
O	18	Sample X354	8802	9556	9307					O	18	0.0354407	0.0845724	0.0681412					O	18	0.081245	0.123461	0.0862955		-0.00929134	0.00063132	0
O	19	Sample X355	9087	9460	9836	9461	8841.33	0.046875		O	19	0.0537939	0.078213	0.103298					O	19	0.0485589	0.0707278	0.107644		0.00922918	0.0073857	0
O	20	Sample X356	9262	8686	8576					O	20	0.0651936	0.0280448	0.0210705					O	20	0.110998	0.0669332	0.0392248		-0.0069271	-0.00897163	0
O	21	Sample X357	9161	8926	8504	8863.67	7832	0.0234375		O	21	0.0586022	0.0433939	0.016526					O	21	0.0533671	0.0359087	0.0208722		-0.00375913	-0.00406187	0
O	22	Sample X358	7687	8018	7791					O	22	-0.0339338	-0.0137324	-0.0276214					O	22	0.0118705	0.0251561	-0.00946708		-0.00865579	-0.0026672	0
O	23	Sample X359	8324	8360	8170	8284.67	7680.33	0		O	23	0.00523506	0.00748527	-0.00434613					O	23	0	0	0		0	0	0
O	24	Sample X360	7490	7605	7946					O	24	-0.0458043	-0.0388885	-0.0181543					O	24	0	0	0		0	0	0
									0			#DIV/0!	#DIV/0!
									0			#DIV/0!	#DIV/0!
									0			#DIV/0!	#DIV/0!
									0			#DIV/0!	#DIV/0!
									0			#DIV/0!	#DIV/0!
									0			#DIV/0!	#DIV/0!
									0			#DIV/0!	#DIV/0!
									0			#DIV/0!	#DIV/0!
[truncated: 12 more columns]
