# Supplementary material for: PDZ-directed substrate recruitment is the primary determinant of specific 4E-BP1 dephosphorylation by PP1-Neurabin
Source: eLife journal article supplement (doi:10.7554/elife.103403), 2024-11-20
Supplement: fig5-data1 [file repli3.xlsx]

## Sheet: All Cycles
Well Row	Well Col	Content	Raw Data (425-10/460-20)	Raw Data (425-10/460-20)	Raw Data (425-10/460-20)				convert to phosphate	Well Row	Well Col	Raw Data (425-10/460-20)	Raw Data (425-10/460-20)	Raw Data (425-10/460-20)				normalize to the lasst column	Well Row	Well Col	Raw Data (425-10/460-20)	Raw Data (425-10/460-20)	Raw Data (425-10/460-20)								PP1-Neb 0.25 nM																PP1-Ph3 2.5 nM
		Time [s]	0	240	480							0	4	8							0	4	8								V1	V2	V3	V4	V5	V6	V7	V8	4ebp-pdz	4ebp-sgs	irsp53-pdz	irsp53-sgs	L5A-PDZ	L5A-SGS			V1	V2	V3
A	1	Sample X1	23622	35100	40211				0.577646	A	1	1.5347	4.88014	9.1562					A	1	0.367404	4.76222	9.02664		1.06611	1.08241	0			400	1.08241	0.0992185	0.0979389	0.066482	0.0750291	1.25178	0.311076	0.766972	0.125657	0.0539722	0.289717	0.210068	0.211871	0.163138			-8.41016	0.194356	0.235985
A	2	Sample X2	31087	48323	50762					A	2	3.22522	134.492	-64.2128					A	2	2.961	134.308	-64.3203		-49.657	-8.41016	1			200	0.913219	0.0866246	0.100324	0.0572706	0.0657601	0.855998	0.255509	0.622879	0.0859227	0.0429015	0.213505	0.140073	0.189973	0.105271			-10.403	0.161058	0.184635
A	3	Sample X3	21671	34338	39658					A	3	1.24465	4.4966	8.46972					A	3	1.03441	4.37868	8.34017		0.990373	0.913219	0			100	0.83729	0.0821954	0.088292	0.0575826	0.06471	1.29095	0.215568	0.527598	0.0699651	0.0375054	0.389149	0.109223	0.397818	0.132978			6.91364	0.0909784	0.125909
A	4	Sample X4	28706	48056	50405					A	4	2.55147	98.7623	-80.8295					A	4	2.28725	98.5777	-80.937		-44.8787	-10.403	1			50	0.836436	0.0829819	0.0749117	0.0552607	0.0555144	0.6466	0.208408	0.362944	0.102681	0.014629	0.41537	0.0942013	0.268902	0.0893808			-33.091	0.0830929	0.0730477
A	5	Sample X5	17857	31848	38644					A	5	0.782346	3.47982	7.39998					A	5	0.572104	3.3619	7.27042		0.977131	0.83729	0			25	1.02661	0.068158	0.0844053	0.0404652	0.0652114	0.417153	0.139412	0.598611	0.0805759	0.0045773	0.433318	0.0602765	0.290541	0.0504475			1.42405	0.0470783	0.041815
A	6	Sample X6	22852	44226	47325					A	6	1.41507	18.8307	56.5675					A	6	1.15085	18.6461	56.46		9.45346	6.91364	1			12.5	0.612883	0.0834242	0.0701964	0.0289809	0.0586798	0.604232	0.195527	0.451558	0.0609412	0.000379855	0.347165	0.0410439	0.222605	0.0290427			0.44028	0.01456	0.0275003
A	7	Sample X7	18813	31993	38746					A	7	0.887284	3.53091	7.49809					A	7	0.677043	3.41298	7.36853		0.988888	0.836436	0			6.25	0.288305	0.054786	0.0571766	0.035447	0.0499453	0.306112	0.167864	0.338372	0.0486599	-0.000664714	0.230561	0.0114015	0.179528	0.0163974			0.169955	0.0213779	0.023994
A	8	Sample X8	20190	41253	49477					A	8	1.05064	10.7133	-263.834					A	8	0.786423	10.5287	-263.941		-68.6175	-33.091	1			3.125	0.261301	0.0409646	0.0631994	0.0122747	0.0339522	0.159751	0.11947	0.223186	0.0367052	-0.00593175	0.130728	0.00118442	0.106192	0.00252741			0.0955865	0.0136991	0.01125
A	9	Sample X9	18375	31152	40068					A	9	0.838394	3.24612	8.97061					A	9	0.628153	3.12819	8.84105		1.42821	1.02661	0			1.5625	0.11537	0.0291378	0.0434969	0.0101507	0.0134317	0.067576	0.0692988	0.117315	0.026477	-0.00542373	0.0692819	0.000619457	0.0570339	0.00495629			0.0511142	0.0110959	0.0087596
A	10	Sample X10	16313	31697	41877					A	10	0.625795	3.42753	11.8614					A	10	0.361578	3.24293	11.754		2.12776	1.42405	0			0.78125	0.0633547	0.0109842	0.0324758	0.0058825	-0.000924023	0.0406969	0.0346985	0.0628286	0.0104583	-0.00707185	0.0375256	0.00101048	0.0332305	0.00400483			0.0212082	0.0219977	0.0141052
A	11	Sample X11	16792	28858	36170					A	11	0.67276	2.58974	5.49514					A	11	0.462519	2.47181	5.36558		0.723442	0.612883	0			0.390625	0.0393779	0.00105654	0.0243506	0.0152133	0.00834429	0.0529357	0.0314673	0.0460344	0.0110317	-0.0048415	0.0397861	0.00275855	0.0164781	0.00261368			0.0064103	0.00707958	0.0147213
A	12	Sample X12	14968	24704	32888					A	12	0.500971	1.71556	3.86647					A	12	0.236754	1.53097	3.75899		0.557006	0.44028	0			0	0	0	0	0	0	0	0	0	0	0	0	0	0	0			0	0	0
A	13	Sample X13	15037	22968	29407					A	13	0.507135	1.43264	2.73289					A	13	0.296893	1.31471	2.60334		0.322156	0.288305	0
A	14	Sample X14	13667	19886	23976					A	14	0.389252	1.01325	1.59215					A	14	0.125035	0.828653	1.48467		0.164005	0.169955	0				3	27	51	75	99	123	147	171	195	219	243	267	291	315	339		3	27	51
A	15	Sample X15	13502	20551	28019					A	15	0.375667	1.09608	2.38539					A	15	0.165426	0.978148	2.25583		0.319421	0.261301	0				PP1-Neb 0.25 nM																PP1-Ph3 2.5 nM
A	16	Sample X16	14062	16350	20025					A	16	0.422294	0.629374	1.03025					A	16	0.158077	0.444776	0.922769		0.119498	0.0955865	0				V1	V2	V3	V4	V5	V6	V7	V8	4ebp-pdz	4ebp-sgs	irsp53-pdz	irsp53-sgs	L5A-PDZ	L5A-SGS			V1	V2	V3
A	17	Sample X17	11425	16111	20242					A	17	0.214843	0.606398	1.05711					A	17	0.00460139	0.48847	0.927559		0.109772	0.11537	0		0	400	1.08241	0.0992185	0.0979389	0.066482	0.0750291	1.25178	0.311076	0.766972	0.125657	0.0539722	0.289717	0.210068	0.211871	0.163138			na	0.194356	0.235985
A	18	Sample X18	13210	14184	16087					A	18	0.351932	0.43265	0.604109					A	18	0.0877148	0.248053	0.496628		0.0621439	0.0511142	0		2	200	0.913219	0.0866246	0.100324	0.0572706	0.0657601	0.855998	0.255509	0.622879	0.0859227	0.0429015	0.213505	0.140073	0.189973	0.105271			na	0.161058	0.184635
A	19	Sample X19	11164	13399	16274					A	19	0.195879	0.36725	0.622031					A	19	-0.014362	0.249323	0.492476		0.0607882	0.0633547	0		4	100	0.83729	0.0821954	0.088292	0.0575826	0.06471	1.29095	0.215568	0.527598	0.0699651	0.0375054	0.389149	0.109223	0.397818	0.132978			na	0.0909784	0.125909
A	20	Sample X20	12503	11865	12669					A	20	0.296034	0.247414	0.308963					A	20	0.0318164	0.0628162	0.201482		0.0346665	0.0212082	0		6	50	0.836436	0.0829819	0.0749117	0.0552607	0.0555144	0.6466	0.208408	0.362944	0.102681	0.014629	0.41537	0.0942013	0.268902	0.0893808			na	0.0830929	0.0730477
A	21	Sample X21	10825	12628	13868					A	21	0.171635	0.305759	0.405973					A	21	-0.0386062	0.187831	0.276417		0.0221465	0.0393779	0		8	25	1.02661	0.068158	0.0844053	0.0404652	0.0652114	0.417153	0.139412	0.598611	0.0805759	0.0045773	0.433318	0.0602765	0.290541	0.0504475			1.42405	0.0470783	0.041815
A	22	Sample X22	12958	11517	11581					A	22	0.331757	0.22159	0.226303					A	22	0.0675397	0.0369924	0.118822		0.0204574	0.0064103	0		10	12.5	0.612883	0.0834242	0.0701964	0.0289809	0.0586798	0.604232	0.195527	0.451558	0.0609412	0.000379855	0.347165	0.0410439	0.222605	0.0290427			0.44028	0.01456	0.0275003
A	23	Sample X23	11362	10052	10222					A	23	0.210241	0.117928	0.129556					A	23	0	0	0		0	0	0		12	6.25	0.288305	0.054786	0.0571766	0.035447	0.0499453	0.306112	0.167864	0.338372	0.0486599	-0.000664714	0.230561	0.0114015	0.179528	0.0163974			0.169955	0.0213779	0.023994
A	24	Sample X24	12088	11007	9898					A	24	0.264217	0.184597	0.107481					A	24	0	0	0		0	0	0		14	3.125	0.261301	0.0409646	0.0631994	0.0122747	0.0339522	0.159751	0.11947	0.223186	0.0367052	-0.00593175	0.130728	0.00118442	0.106192	0.00252741			0.0955865	0.0136991	0.01125
B	1	Sample X25	12509	17445	20935					B	1	0.296499	0.739077	1.14568					B	1	0.267564	0.706766	1.06131		0.0886365	0.0992185	0		16	1.5625	0.11537	0.0291378	0.0434969	0.0101507	0.0134317	0.067576	0.0692988	0.117315	0.026477	-0.00542373	0.0692819	0.000619457	0.0570339	0.00495629			0.0511142	0.0110959	0.0087596
B	2	Sample X26	12989	19471	24554					B	2	0.334223	0.963448	1.68954					B	2	0.0917445	0.952392	1.64659		0.17355	0.194356	0		18	0.78125	0.0633547	0.0109842	0.0324758	0.0058825	-0.000924023	0.0406969	0.0346985	0.0628286	0.0104583	-0.00707185	0.0375256	0.00101048	0.0332305	0.00400483			0.0212082	0.0219977	0.0141052
B	3	Sample X27	12067	16525	19868					B	3	0.262626	0.646411	1.01106					B	3	0.233691	0.614099	0.926688		0.0781472	0.0866246	0		20	0.390625	0.0393779	0.00105654	0.0243506	0.0152133	0.00834429	0.0529357	0.0314673	0.0460344	0.0110317	na	0.0397861	0.00275855	0.0164781	0.00261368			0.0064103	0.00707958	0.0147213
B	4	Sample X28	12044	18045	22412					B	4	0.260886	0.802471	1.34982					B	4	0.0184066	0.791415	1.30687		0.128864	0.161058	0		22	0	0	0	0	0	na	0	0	0	0	0	0	0	0	0			0	0	0
B	5	Sample X29	11754	15818	19375					B	5	0.239124	0.578682	0.952126					B	5	0.210189	0.546371	0.867753		0.0803455	0.0821954	0
B	6	Sample X30	10435	13812	16790					B	6	0.14427	0.401295	0.672561					B	6	-0.0982094	0.390239	0.629618		0.0598446	0.0909784	0
B	7	Sample X31	12136	16344	19670					B	7	0.267861	0.628793	0.987154					B	7	0.238925	0.596481	0.902781		0.0765749	0.0829819	0
B	8	Sample X32	11631	14285	17016					B	8	0.229997	0.441279	0.695205					B	8	-0.0124825	0.430223	0.652261		0.0555096	0.0830929	0
B	9	Sample X33	11391	15842	18143					B	9	0.212357	0.580934	0.813059					B	9	0.183422	0.548623	0.728686		0.0450159	0.068158	0
B	10	Sample X34	12230	12666	14411					B	10	0.275023	0.308729	0.452114					B	10	0.0325441	0.297672	0.40917		0.0278745	0.0470783	0
B	11	Sample X35	11132	15310	19068					B	11	0.193572	0.531768	0.916404					B	11	0.164637	0.499456	0.832031		0.0831436	0.0834242	0
B	12	Sample X36	11912	10296	10772					B	12	0.250938	0.134649	0.167883					B	12	0.00845943	0.123593	0.12494		0.00033668	0.01456	0
B	13	Sample X37	12171	15493	17686					B	13	0.270523	0.548504	0.764249					B	13	0.241588	0.516193	0.679876		0.0409207	0.054786	0
B	14	Sample X38	10569	10299	10157					B	14	0.15361	0.134856	0.125098					B	14	-0.0888694	0.1238	0.0821541		-0.0104115	0.0213779	0
B	15	Sample X39	11717	12549	16248					B	15	0.236372	0.299605	0.619527					B	15	0.207437	0.267293	0.535154		0.0669652	0.0409646	0
B	16	Sample X40	10745	9181	9427					B	16	0.165976	0.0599048	0.0760341					B	16	-0.0765027	0.0488485	0.0330904		-0.00393952	0.0136991	0
B	17	Sample X41	10646	11827	14358					B	17	0.159006	0.24457	0.447547					B	17	0.130071	0.212259	0.363174		0.0377286	0.0291378	0
B	18	Sample X42	10713	9018	9074					B	18	0.163719	0.0493265	0.0529511					B	18	-0.0787597	0.0382703	0.0100074		-0.00706572	0.0110959	0
B	19	Sample X43	10462	10249	12418					B	19	0.146146	0.131412	0.289458					B	19	0.117211	0.0991007	0.205085		0.0264961	0.0109842	0
B	20	Sample X44	10610	9648	10271					B	20	0.15648	0.0906959	0.132926					B	20	-0.0859986	0.0796396	0.0899827		0.00258577	0.0219977	0
B	21	Sample X45	9990	9483	10909					B	21	0.113712	0.0797338	0.177602					B	21	0.0847768	0.0474225	0.0932292		0.0114517	0.00105654	0
B	22	Sample X46	11063	9046	8962					B	22	0.188611	0.0511375	0.0457121					B	22	-0.0538681	0.0400813	0.0027685		-0.0093282	0.00707958	0
B	23	Sample X47	8700	8753	9553					B	23	0.0289351	0.0323114	0.0843732					B	23	0	0	0		0	0	0
B	24	Sample X48	11799	8417	8919					B	24	0.242479	0.0110562	0.0429437					B	24	0	0	0		0	0	0
C	1	Sample X49	12903	17059	19980					C	1	0.327391	0.699549	1.02473					C	1	0.185411	0.674172	0.968923		0.0736877	0.0979389	0
C	2	Sample X50	14350	21951	27265					C	2	0.446859	1.28372	2.21515					C	2	0.272243	1.15492	2.16012		0.251302	0.235985	0
C	3	Sample X51	13456	17109	20490					C	3	0.371902	0.704615	1.08832					C	3	0.229923	0.679238	1.03251		0.0883184	0.100324	0
C	4	Sample X52	13018	19825	24580					C	4	0.336535	1.00584	1.69402					C	4	0.161919	0.877041	1.639		0.190489	0.184635	0
C	5	Sample X53	12168	15899	18841					C	5	0.270295	0.586295	0.890457					C	5	0.128315	0.560918	0.834651		0.0684334	0.088292	0
C	6	Sample X54	13327	16996	21703					C	6	0.361396	0.693188	1.24908					C	6	0.18678	0.564388	1.19405		0.157416	0.125909	0
C	7	Sample X55	12070	15150	17797					C	7	0.262853	0.517283	0.775974					C	7	0.120874	0.491905	0.720168		0.0570656	0.0749117	0
C	8	Sample X56	10787	13831	16395					C	8	0.168944	0.402881	0.633737					C	8	-0.00567125	0.27408	0.57871		0.0761575	0.0730477	0
C	9	Sample X57	11657	15382	18216					C	9	0.231921	0.538331	0.82099					C	9	0.0899416	0.512954	0.765184		0.0630576	0.0844053	0
C	10	Sample X58	10617	12074	13456					C	10	0.156971	0.263156	0.371902					C	10	-0.0176443	0.134356	0.316875		0.0456299	0.041815	0
C	11	Sample X59	11424	14557	16966					C	11	0.214769	0.464768	0.690168					C	11	0.0727901	0.43939	0.634362		0.0487428	0.0701964	0
C	12	Sample X60	10414	10358	11809					C	12	0.142812	0.138932	0.243226					C	12	-0.0318037	0.0101315	0.188199		0.0445168	0.0275003	0
C	13	Sample X61	10722	13503	15352					C	13	0.164354	0.375749	0.535593					C	13	0.0223743	0.350372	0.479787		0.0323539	0.0571766	0
C	14	Sample X62	9283	9768	10358					C	14	0.0665683	0.0987261	0.138932					C	14	-0.108047	-0.0300742	0.0839051		0.0284948	0.023994	0
C	15	Sample X63	9396	11481	14883					C	15	0.0739905	0.218946	0.493412					C	15	-0.0679889	0.193568	0.437606		0.0610095	0.0631994	0
C	16	Sample X64	10024	8856	9584					C	16	0.116022	0.0388982	0.0864331					C	16	-0.0585933	-0.0899022	0.0314063		0.0303271	0.01125	0
C	17	Sample X65	9285	10609	12917					C	17	0.0666993	0.15641	0.328501					C	17	-0.0752801	0.131033	0.272695		0.0354155	0.0434969	0
C	18	Sample X66	9995	8835	9252					C	18	0.114051	0.0375525	0.0645395					C	18	-0.060564	-0.0912478	0.00951275		0.0251901	0.0087596	0
C	19	Sample X67	9262	9585	11750					C	19	0.0651936	0.0864996	0.238827					C	19	-0.0767858	0.0611222	0.183021		0.0304746	0.0324758	0
C	20	Sample X68	8954	8915	8849					C	20	0.0451966	0.0426864	0.0384495					C	20	-0.129419	-0.0861139	-0.0165773		0.0173841	0.0141052	0
C	21	Sample X69	8741	9093	10376					C	21	0.0315461	0.0541831	0.140178					C	21	-0.110433	0.0288057	0.0843717		0.0138915	0.0243506	0
C	22	Sample X70	9122	9623	9094					C	22	0.0560659	0.0890291	0.054248					C	22	-0.11855	-0.0397713	-0.000778781		0.00974812	0.0147213	0
C	23	Sample X71	10402	8644	9118					C	23	0.141979	0.0253774	0.055806					C	23	0	0	0		0	0	0
C	24	Sample X72	10867	10211	9106					C	24	0.174615	0.1288	0.0550268					C	24	0	0	0		0	0	0
D	1	Sample X73	10959	14122	16594					D	1	0.181167	0.427378	0.653179					D	1	0.0749015	0.407445	0.606757		0.049828	0.066482	0
D	2	Sample X74	11456	15807	19406					D	2	0.217112	0.577651	0.955774					D	2	0.182567	0.53181	0.945909		0.103525	0.0954178	0
D	3	Sample X75	11572	14215	16294					D	3	0.225639	0.435293	0.62396					D	3	0.119374	0.41536	0.577539		0.0405446	0.0572706	0
D	4	Sample X76	10686	13979	16728					D	4	0.161818	0.415289	0.666405					D	4	0.127272	0.369448	0.65654		0.0717729	0.0661584	0
D	5	Sample X77	10533	13169	15530					D	5	0.151094	0.34863	0.551911					D	5	0.0448287	0.328697	0.505489		0.044198	0.0575826	0
D	6	Sample X78	9699	11841	13256					D	6	0.0941027	0.245617	0.355645					D	6	0.0595569	0.199776	0.345781		0.0365011	0.035778	0
D	7	Sample X79	10474	13331	15282					D	7	0.146981	0.36172	0.529223					D	7	0.040716	0.341787	0.482802		0.0352536	0.0552607	0
D	8	Sample X80	9306	10180	11575					D	8	0.0680756	0.126674	0.225861					D	8	0.0335298	0.0808325	0.215996		0.0337908	0.0228082	0
D	9	Sample X81	10852	13549	14240					D	9	0.17355	0.379524	0.437428					D	9	0.067285	0.359591	0.391007		0.007854	0.0404652	0
D	10	Sample X82	9805	10030	10534					D	10	0.101212	0.11643	0.151164					D	10	0.0666662	0.0705892	0.141299		0.0176775	0.00932911	0
D	11	Sample X83	10548	11870	12862					D	11	0.152142	0.247788	0.324145					D	11	0.0458763	0.227855	0.277724		0.0124671	0.0289809	0
D	12	Sample X84	9362	9258	9935					D	12	0.0717529	0.0649319	0.109983					D	12	0.037207	0.0190909	0.100119		0.0202569	0.00786394	0
D	13	Sample X85	9839	10922	12901					D	13	0.1035	0.178528	0.327232					D	13	-0.00276489	0.158595	0.280811		0.0305539	0.035447	0
D	14	Sample X86	8755	8983	8946					D	14	0.0324389	0.0470664	0.0446813					D	14	-0.00210688	0.0012253	0.0348165		0.0083978	0.00461542	0
D	15	Sample X87	10164	10095	10716					D	15	0.125577	0.120859	0.163931					D	15	0.0193118	0.100926	0.117509		0.00414575	0.0122747	0
D	16	Sample X88	8964	8492	8707					D	16	0.0458411	0.0157702	0.0293805					D	16	0.0112952	-0.0300709	0.0195157		0.0123967	0.00102756	0
D	17	Sample X89	9190	9051	9515					D	17	0.0604914	0.0514612	0.0818526					D	17	-0.045774	0.0315283	0.0354313		0.000975752	0.0101507	0
D	18	Sample X90	9711	8143	8406					D	18	0.0949056	-0.00601852	0.0103663					D	18	0.0603598	-0.0518596	0.000501522		0.0130903	-0.00748229	0
D	19	Sample X91	9096	8584	8898					D	19	0.0543778	0.0215765	0.0415937					D	19	-0.0518876	0.00164358	-0.00482757		-0.00161779	0.0058825	0
D	20	Sample X92	8229	8208	8590					D	20	-0.000683949	-0.00198865	0.021956					D	20	-0.0352298	-0.0478297	0.0120912		0.0149802	0.00591512	0
D	21	Sample X93	8561	8521	9517					D	21	0.0201224	0.0175976	0.0819852					D	21	-0.0861429	-0.0023353	0.0355639		0.00947479	0.0152133	0
D	22	Sample X94	8626	8593	8635					D	22	0.0242359	0.0221459	0.0248065					D	22	-0.0103099	-0.0236952	0.0149417		0.00965923	0.00315645	0
D	23	Sample X95	9880	8558	8973					D	23	0.106265	0.0199329	0.0464213					D	23	0	0	0		0	0	0
D	24	Sample X96	8788	8964	8398					D	24	0.0345458	0.0458411	0.00986481					D	24	0	0	0		0	0	0
E	1	Sample X97	11759	15792	18629					E	1	0.239497	0.576246	0.866574					E	1	0.268517	0.624088	0.868749		0.0611654	0.0750291	0
E	2	Sample X98	22679	32966	35285					E	2	1.38915	3.89748	4.97965					E	2	1.41781	3.92297	4.96457		0.2604	0.443346	0
E	3	Sample X99	11088	14692	17486					E	3	0.190406	0.476564	0.743332					E	3	0.219427	0.524406	0.745507		0.0552754	0.0657601	0
E	4	Sample X100	20041	31373	34196					E	4	1.03222	3.31834	4.42947					E	4	1.06087	3.34383	4.41439		0.267641	0.41919	0
E	5	Sample X101	10898	14397	17273					E	5	0.176819	0.450906	0.721345					E	5	0.20584	0.498748	0.72352		0.056193	0.06471	0
E	6	Sample X102	16720	28926	32162					E	6	0.665612	2.60705	3.59155					E	6	0.694267	2.63254	3.57647		0.235984	0.360276	0
E	7	Sample X103	11015	14328	16624					E	7	0.18517	0.444968	0.65613					E	7	0.21419	0.492809	0.658305		0.0413739	0.0555144	0
E	8	Sample X104	14354	24567	28567					E	8	0.447203	1.69178	2.51697					E	8	0.475858	1.71727	2.50189		0.196156	0.253254	0
E	9	Sample X105	10869	13999	17292					E	9	0.174758	0.416974	0.723294					E	9	0.203778	0.464815	0.725469		0.0651634	0.0652114	0
E	10	Sample X106	12144	20306	25567					E	10	0.268469	1.06512	1.87176					E	10	0.297124	1.09061	1.85668		0.191518	0.194944	0
E	11	Sample X107	10693	13937	16649					E	11	0.162311	0.411757	0.658594					E	11	0.191331	0.459599	0.660769		0.0502925	0.0586798	0
E	12	Sample X108	10227	14478	19756					E	12	0.129899	0.457908	0.997498					E	12	0.158555	0.483398	0.982421		0.124756	0.102983	0
E	13	Sample X109	10210	13387	15565					E	13	0.128732	0.366273	0.555139					E	13	0.157752	0.414115	0.557314		0.0358	0.0499453	0
E	14	Sample X110	8441	11309	14853					E	14	0.0125628	0.206382	0.490753					E	14	0.0412182	0.231872	0.475676		0.0609509	0.0543072	0
E	15	Sample X111	9606	11161	13632					E	15	0.0878968	0.195663	0.38636					E	15	0.116917	0.243504	0.388535		0.0362575	0.0339522	0
E	16	Sample X112	7957	9246	11617					E	16	-0.0174798	0.0641472	0.228961					E	16	0.0111756	0.0896371	0.213884		0.0310616	0.0253385	0
E	17	Sample X113	9189	9586	11148					E	17	0.0604262	0.0865661	0.194725					E	17	0.0894463	0.134408	0.1969		0.0156231	0.0134317	0
E	18	Sample X114	7658	8236	9692					E	18	-0.0356883	-0.000248751	0.0936346					E	18	-0.00703288	0.0252411	0.0785569		0.0133289	0.0106987	0
E	19	Sample X115	9000	8678	9299					E	19	0.0481637	0.0275363	0.0676167					E	19	0.0771838	0.0753779	0.0697916		-0.00139657	-0.000924023	0
E	20	Sample X116	7668	8719	8727					E	20	-0.0350836	0.0301444	0.030654					E	20	-0.00642815	0.0556343	0.0155763		-0.0100145	0.00275055	0
E	21	Sample X117	7720	8163	9208					E	21	-0.0319342	-0.00477992	0.0616653					E	21	-0.0029141	0.0430617	0.0638403		0.00519464	0.00834429	0
E	22	Sample X118	7712	7714	8289					E	22	-0.0324193	-0.032298	0.00305116					E	22	-0.00376386	-0.00680813	-0.0120265		-0.0013046	-0.00103284	0
E	23	Sample X119	7768	7456	8205					E	23	-0.0290201	-0.0478416	-0.00217492					E	23	0	0	0		0	0	1
E	24	Sample X120	7774	7826	8481					E	24	-0.0286554	-0.0254899	0.0150777					E	24	0	0	0		0	0	0
F	1	Sample X121	29120	39215	42256					F	1	2.65707	7.97532	12.6613					F	1	2.5629	7.92314	12.5771		1.16349	1.25178	0
F	2	Sample X122	34830	45427	46873					F	2	4.73955	25.8568	44.4621					F	2	4.58412	25.7218	44.3043		4.64565	4.96503	1
F	3	Sample X123	26244	36947	39965					F	3	2.00255	6.00971	8.84054					F	3	1.90838	5.95753	8.75636		0.699707	0.855998	0
F	4	Sample X124	29793	43793	46196					F	4	2.83842	17.0805	33.4287					F	4	2.68299	16.9454	33.2709		4.08137	3.82349	1
F	5	Sample X125	25905	38041	42068					F	5	1.9361	6.85701	12.2537					F	5	1.84193	6.80484	12.1696		1.34118	1.29095	0
F	6	Sample X126	24370	38744	40853					F	6	1.65804	7.49615	10.0689					F	6	1.50261	7.36108	9.91118		0.637524	1.05107	0
F	7	Sample X127	23901	33983	37905					F	7	1.57985	4.33114	6.74265					F	7	1.48568	4.27897	6.65847		0.594877	0.6466	0
F	8	Sample X128	18413	32006	39214					F	8	0.842581	3.53553	7.97425					F	8	0.687151	3.40047	7.81651		1.10401	0.89117	0
F	9	Sample X129	20570	29830	34188					F	9	1.0985	2.84876	4.42573					F	9	1.00433	2.79658	4.34155		0.386242	0.417153	0
F	10	Sample X130	14812	25191	32653					F	10	0.487127	1.80232	3.77482					F	10	0.331698	1.66725	3.61708		0.487457	0.410673	0
F	11	Sample X131	18510	29977	36456					F	11	0.853314	2.89023	5.67717					F	11	0.759144	2.83805	5.593		0.688737	0.604232	0
F	12	Sample X132	13046	19551	25033					F	12	0.33877	0.97294	1.77379					F	12	0.183341	0.837877	1.61604		0.194542	0.179088	0
F	13	Sample X133	16908	24992	30763					F	13	0.684344	1.76644	3.12324					F	13	0.590175	1.71427	3.03907		0.3312	0.306112	0
F	14	Sample X134	10998	14924	18882					F	14	0.183954	0.497054	0.895115					F	14	0.0285242	0.36199	0.737372		0.0938455	0.088606	0
F	15	Sample X135	13347	19736	24210					F	15	0.36302	0.995087	1.63103					F	15	0.26885	0.942914	1.54686		0.150986	0.159751	0
F	16	Sample X136	11424	12244	15025					F	16	0.214769	0.276093	0.506061					F	16	0.0593401	0.14103	0.348318		0.0518221	0.0361223	0
F	17	Sample X137	13660	16355	19093					F	17	0.388673	0.629858	0.919286					F	17	0.294503	0.577684	0.835112		0.0643568	0.067576	0
F	18	Sample X138	9873	11402	12706					F	18	0.105793	0.213161	0.311861					F	18	-0.0496365	0.0780978	0.154119		0.0190052	0.0254694	0
F	19	Sample X139	11709	13727	15524					F	19	0.235778	0.394223	0.551358					F	19	0.141608	0.34205	0.467184		0.0312835	0.0406969	0
F	20	Sample X140	10152	9759	10207					F	20	0.124755	0.0981221	0.128526					F	20	-0.0306739	-0.0369411	-0.0292169		0.00193103	0.000182127	0
F	21	Sample X141	11426	14085	16340					F	21	0.214916	0.424241	0.628406					F	21	0.120746	0.372067	0.544232		0.0430411	0.0529357	0
F	22	Sample X142	9265	9437	10253					F	22	0.0653899	0.076694	0.131687					F	22	-0.0900395	-0.0583692	-0.0260554		0.00807844	0.00799801	0
F	23	Sample X143	9700	9062	9550					F	23	0.0941696	0.0521735	0.084174					F	23	0	0	0		0	0	0
F	24	Sample X144	10595	10302	10628					F	24	0.155429	0.135063	0.157743					F	24	0	0	0		0	0	0
G	1	Sample X145	18304	26961	31469					G	1	0.8306	2.1498	3.35027					G	1	0.781468	2.09282	3.27008		0.294314	0.311076	0
G	2	Sample X146	30146	42664	44450					G	2	2.93869	13.628	19.8647					G	2	2.84553	13.5644	19.7973		1.55823	2.11897	1
G	3	Sample X147	16952	24787	29522					G	3	0.68876	1.7301	2.7639					G	3	0.639627	1.67313	2.6837		0.252643	0.255509	0
G	4	Sample X148	27286	40236	42514					G	4	2.21973	9.18926	13.2586					G	4	2.12657	9.1257	13.1912		1.01639	1.38308	0
G	5	Sample X149	17265	24076	28400					G	5	0.720525	1.60868	2.47613					G	5	0.671392	1.5517	2.39593		0.211058	0.215568	0
G	6	Sample X150	22745	36396	39007					G	6	1.399	5.6383	7.75818					G	6	1.30583	5.57474	7.69083		0.529021	0.798124	0
G	7	Sample X151	16375	22229	27780					G	7	0.631796	1.3233	2.33012					G	7	0.582664	1.26633	2.24993		0.245899	0.208408	0
G	8	Sample X152	19059	31803	35515					G	8	0.915368	3.46414	5.10715					G	8	0.822201	3.40059	5.0398		0.409803	0.527199	0
G	9	Sample X153	16146	20905	24934					G	9	0.609742	1.14176	1.7561					G	9	0.560609	1.08478	1.6759		0.147779	0.139412	0
G	10	Sample X154	16026	27496	32595					G	10	0.598307	2.26604	3.75261					G	10	0.50514	2.20248	3.68525		0.370692	0.397514	0
G	11	Sample X155	15048	22090	26740					G	11	0.508119	1.30341	2.1034					G	11	0.458987	1.24643	2.0232		0.194193	0.195527	0
G	12	Sample X156	12529	19756	26134					G	12	0.298051	0.997498	1.98077					G	12	0.204884	0.933939	1.91342		0.244869	0.213566	0
G	13	Sample X157	13949	19576	25105					G	13	0.412765	0.975916	1.78674					G	13	0.363633	0.918941	1.70654		0.196901	0.167864	0
G	14	Sample X158	11324	15637	19124					G	14	0.207473	0.561803	0.922866					G	14	0.114307	0.498244	0.855511		0.0893167	0.0926506	0
G	15	Sample X159	11835	17959	21579					G	15	0.245168	0.793235	1.23199					G	15	0.196036	0.736259	1.1518		0.103884	0.11947	0
G	16	Sample X160	11012	12917	15031					G	16	0.184955	0.328501	0.506598					G	16	0.0917887	0.264942	0.439243		0.0435753	0.0434318	0
G	17	Sample X161	10584	13726	17455					G	17	0.154659	0.39414	0.740114					G	17	0.105527	0.337165	0.659917		0.080688	0.0692988	0
G	18	Sample X162	9750	10876	12025					G	18	0.0975184	0.175255	0.259449					G	18	0.00435179	0.111696	0.192095		0.0200997	0.0234679	0
G	19	Sample X163	10121	12546	14168					G	19	0.122635	0.299372	0.431288					G	19	0.0735024	0.242396	0.351091		0.0271738	0.0346985	0
G	20	Sample X164	11906	10794	11309					G	20	0.250488	0.169439	0.206382					G	20	0.157321	0.105881	0.139028		0.00828678	-0.00228671	0
G	21	Sample X165	9209	11204	13118					G	21	0.0617306	0.198769	0.344534					G	21	0.0125979	0.141793	0.264337		0.030636	0.0314673	0
G	22	Sample X166	9713	9856	10107					G	22	0.0950395	0.104646	0.121679					G	22	0.00187285	0.0410872	0.0543241		0.00330923	0.0065564	0
G	23	Sample X167	9015	9136	9490					G	23	0.0491327	0.0569758	0.080197					G	23	0	0	0		0	0	0
G	24	Sample X168	9685	9237	9295					G	24	0.0931666	0.063559	0.0673545					G	24	0	0	0		0	0	0
H	1	Sample X169	26939	36185	39528					H	1	2.14514	5.50448	8.31988					H	1	2.10893	5.44848	8.24471		0.699056	0.766972	0
H	2	Sample X170	38768	46217	47153					H	2	7.5195	33.6925	51.2917					H	2	7.47224	33.6464	51.254		4.40191	5.47272	1
H	3	Sample X171	25133	35020	37990					H	3	1.7918	4.83792	6.8138					H	3	1.75559	4.78192	6.73862		0.489174	0.622879	0
H	4	Sample X172	35453	45013	45251					H	4	5.07236	22.9662	24.5516					H	4	5.0251	22.9201	24.5139		0.398469	2.43611	1
H	5	Sample X173	24748	32531	36909					H	5	1.72326	3.72827	5.98301					H	5	1.68705	3.67227	5.90784		0.558892	0.527598	0
H	6	Sample X174	29206	41696	42808					H	6	2.67956	11.5084	13.9992					H	6	2.6323	11.4623	13.9615		0.624803	1.41615	1
H	7	Sample X175	23377	30693	34215					H	7	1.49586	3.10168	4.43838					H	7	1.45965	3.04568	4.3632		0.32938	0.362944	0
H	8	Sample X176	22338	36257	40258					H	8	1.33905	5.54965	9.21851					H	8	1.29179	5.50355	9.1809		0.919336	0.986138	0
H	9	Sample X177	20847	27941	36879					H	9	1.1342	2.36721	5.96206					H	9	1.09799	2.31121	5.88688		0.893917	0.598611	0
H	10	Sample X178	19023	31787	37283					H	10	0.911229	3.45859	6.25322					H	10	0.863969	3.41249	6.2156		0.700778	0.668954	0
H	11	Sample X179	18224	29605	34289					H	11	0.821862	2.7865	4.47329					H	11	0.785653	2.7305	4.39812		0.416904	0.451558	0
H	12	Sample X180	16559	24657	30688					H	12	0.649742	1.70737	3.10015					H	12	0.602482	1.66127	3.06253		0.350314	0.307506	0
H	13	Sample X181	17300	27069	31820					H	13	0.724116	2.17281	3.47006					H	13	0.687908	2.11681	3.39488		0.319519	0.338372	0
H	14	Sample X182	12872	17477	22465					H	14	0.324936	0.742397	1.35756					H	14	0.277676	0.696298	1.31994		0.155912	0.130284	0
H	15	Sample X183	13542	21542	27211					H	15	0.378949	1.22693	2.20341					H	15	0.342741	1.17092	2.12823		0.239327	0.223186	0
H	16	Sample X184	11206	13541	17833					H	16	0.198913	0.378867	0.779794					H	16	0.151653	0.332768	0.742177		0.102352	0.0738155	0
H	17	Sample X185	12708	18400	21992					H	17	0.312018	0.841147	1.2895					H	17	0.27581	0.785146	1.21433		0.107295	0.117315	0
H	18	Sample X186	10632	12393	14448					H	18	0.158023	0.28753	0.455311					H	18	0.110763	0.241431	0.417694		0.0440657	0.0383663	0
H	19	Sample X187	10215	14537	16771					H	19	0.129075	0.463028	0.670672					H	19	0.0928668	0.407027	0.595495		0.047117	0.0628286	0
H	20	Sample X188	10282	10431	11861					H	20	0.133684	0.143992	0.247114					H	20	0.0864243	0.0978929	0.209498		0.0279012	0.0153842	0
H	21	Sample X189	10013	12650	15208					H	21	0.115274	0.307477	0.522518					H	21	0.0790661	0.251476	0.447341		0.0489661	0.0460344	0
H	22	Sample X190	10014	9977	10710					H	22	0.115342	0.11283	0.163508					H	22	0.0680823	0.0667308	0.125891		0.0147902	0.00722614	0
H	23	Sample X191	8814	9121	9414					H	23	0.0362082	0.0560009	0.0751767					H	23	0	0	0		0	0	0
H	24	Sample X192	8986	8968	8836					H	24	0.0472599	0.0460989	0.0376165					H	24	0	0	0		0	0	0
I	1	Sample X193	13880	18126	22736					I	1	0.406977	0.811218	1.39766					I	1	0.364612	0.769303	1.36987		0.150141	0.125657	0
I	2	Sample X194	15809	23994	28667					I	2	0.577838	1.59512	2.54174					I	2	0.555819	1.55648	2.53163		0.243787	0.246976	0
I	3	Sample X195	13486	16085	20162					I	3	0.374356	0.603919	1.04716					I	3	0.331991	0.562004	1.01937		0.114342	0.0859227	0
I	4	Sample X196	13960	21401	26644					I	4	0.41369	1.20774	2.08353					I	4	0.391671	1.16909	2.07342		0.226081	0.210218	0
I	5	Sample X197	13098	15268	18820					I	5	0.34293	0.527952	0.888077					I	5	0.300565	0.486037	0.860286		0.0935623	0.0699651	0
I	6	Sample X198	12214	17773	20577					I	6	0.273801	0.773432	1.09939					I	6	0.251782	0.73479	1.08928		0.0886218	0.104687	0
I	7	Sample X199	12489	16060	20596					I	7	0.294948	0.601538	1.10182					I	7	0.252584	0.559623	1.07403		0.128602	0.102681	0
I	8	Sample X200	11573	14967	18750					I	8	0.225713	0.500882	0.880165					I	8	0.203694	0.46224	0.870049		0.101952	0.0832944	0
I	9	Sample X201	11454	15800	18453					I	9	0.216966	0.576995	0.846998					I	9	0.174601	0.53508	0.819208		0.0710319	0.0805759	0
I	10	Sample X202	10838	12061	14475					I	10	0.172557	0.262172	0.457648					I	10	0.150538	0.22353	0.447532		0.0560005	0.0371243	0
I	11	Sample X203	11648	14914	17105					I	11	0.231255	0.496165	0.70421					I	11	0.18889	0.45425	0.676419		0.0555424	0.0609412	0
I	12	Sample X204	10174	10050	11612					I	12	0.126262	0.117791	0.228592					I	12	0.104243	0.0791497	0.218476		0.0348317	0.0142792	0
I	13	Sample X205	11104	14058	15685					I	13	0.191557	0.421955	0.566261					I	13	0.149192	0.38004	0.538471		0.0396077	0.0486599	0
I	14	Sample X206	9854	9294	10199					I	14	0.104511	0.067289	0.127977					I	14	0.082492	0.0286473	0.117861		0.0223035	0.00442114	0
I	15	Sample X207	9636	11954	13420					I	15	0.0898955	0.254096	0.368962					I	15	0.0475306	0.212181	0.341172		0.0322478	0.0367052	0
I	16	Sample X208	8944	9117	9304					I	16	0.0445525	0.0557411	0.0679445					I	16	0.0225332	0.0170993	0.0578289		0.0101824	0.00441197	0
I	17	Sample X209	8753	10521	11625					I	17	0.0323114	0.150256	0.229553					I	17	-0.0100536	0.108341	0.201762		0.0233552	0.026477	0
I	18	Sample X210	9040	9356	9162					I	18	0.0507493	0.0713584	0.0586673					I	18	0.0287299	0.0327166	0.0485517		0.00395877	0.00247772	0
I	19	Sample X211	8944	9399	9989					I	19	0.0445525	0.0741882	0.113644					I	19	0.00218757	0.0322731	0.0858536		0.0133951	0.0104583	0
I	20	Sample X212	8571	8826	8959					I	20	0.0207544	0.0369762	0.0455188					I	20	-0.00126491	-0.00166554	0.0354033		0.0092672	0.00458352	0
I	21	Sample X213	8353	9256	9498					I	21	0.00704741	0.0648011	0.0807266					I	21	-0.0353175	0.0228861	0.0529361		0.0075125	0.0110317	0
I	22	Sample X214	10228	9320	8880					I	22	0.129968	0.068994	0.0404378					I	22	0.107949	0.0303522	0.0303223		-7.48808e-06	-0.00970331	0
I	23	Sample X215	8910	8903	8682					I	23	0.0423649	0.041915	0.0277905					I	23	0	0	0		0	0	0
I	24	Sample X216	8591	8852	8402					I	24	0.0220193	0.0386417	0.0101155					I	24	0	0	0		0	0	0
J	1	Sample X217	11067	13986	16700					J	1	0.188898	0.415878	0.663632					J	1	0.236201	0.419729	0.667978		0.0620623	0.0539722	0
J	2	Sample X218	11213	12342	14253					J	2	0.19942	0.283605	0.43854					J	2	0.163211	0.291541	0.463786		0.0430612	0.0375718	0
J	3	Sample X219	10373	11853	15248					J	3	0.13997	0.246515	0.526139					J	3	0.187273	0.250365	0.530485		0.0700298	0.0429015	0
J	4	Sample X220	10076	10708	12015					J	4	0.119563	0.163367	0.258694					J	4	0.0833549	0.171303	0.28394		0.0281593	0.0250732	0
J	5	Sample X221	10079	11089	14534					J	5	0.119768	0.190478	0.462767					J	5	0.16707	0.194328	0.467113		0.0681963	0.0375054	0
J	6	Sample X222	9905	9876	9959					J	6	0.107954	0.105995	0.111609					J	6	0.0717458	0.113931	0.136855		0.00573098	0.00813867	0
J	7	Sample X223	9978	11472	12202					J	7	0.112898	0.218285	0.272886					J	7	0.1602	0.222136	0.277232		0.0137741	0.014629	0
J	8	Sample X224	9295	9293	10140					J	8	0.0673545	0.0672235	0.123934					J	8	0.0311463	0.0751594	0.14918		0.0185052	0.0147543	0
J	9	Sample X225	8975	9328	10172					J	9	0.0465503	0.069519	0.126125					J	9	0.093853	0.0733692	0.130471		0.0142755	0.0045773	0
J	10	Sample X226	8877	8718	9613					J	10	0.0402453	0.0300808	0.0883629					J	10	0.00403704	0.0380167	0.113609		0.0188981	0.0136965	0
J	11	Sample X227	8765	9082	9473					J	11	0.033077	0.0534697	0.0790724					J	11	0.0803797	0.0573199	0.0834185		0.00652466	0.000379855	0
J	12	Sample X228	9228	9023	9252					J	12	0.062971	0.0496497	0.0645395					J	12	0.0267628	0.0575857	0.0897856		0.00804997	0.00787785	0
J	13	Sample X229	8252	8772	8848					J	13	0.000746546	0.0335239	0.0383854					J	13	0.0480492	0.037374	0.0427315		0.00133936	-0.000664714	0
J	14	Sample X230	9751	9659	9593					J	14	0.0975855	0.0914299	0.0870317					J	14	0.0613773	0.0993659	0.112278		0.00322796	0.00636256	0
J	15	Sample X231	8648	9081	8577					J	15	0.0256312	0.0534048	0.0211337					J	15	0.0729338	0.057255	0.0254799		-0.00794379	-0.00593175	0
J	16	Sample X232	10027	8213	8669					J	16	0.116226	-0.00167813	0.0269644					J	16	0.0800179	0.00625782	0.0522105		0.0114882	-0.00347593	0
J	17	Sample X233	8148	8362	8141					J	17	-0.00570898	0.00761039	-0.00614231					J	17	0.0415937	0.0114606	-0.00179618		-0.00331419	-0.00542373	0
J	18	Sample X234	9318	8745	7813					J	18	0.0688627	0.0318012	-0.026282					J	18	0.0326545	0.0397371	-0.00103596		-0.0101933	-0.00421131	0
J	19	Sample X235	8532	8183	8315					J	19	0.0182914	-0.00354011	0.00467313					J	19	0.0655941	0.000310066	0.00901925		0.0021773	-0.00707185	0
J	20	Sample X236	8488	8001	7642					J	20	0.0155183	-0.0147779	-0.0366552					J	20	-0.0206899	-0.00684192	-0.0114092		-0.00114182	0.00116009	0
J	21	Sample X237	7586	7359	7656					J	21	-0.0400337	-0.0536358	-0.0358092					J	21	0.00726892	-0.0497856	-0.0314631		0.00458064	-0.0048415	1
J	22	Sample X238	9936	9122	8688					J	22	0.110051	0.0560659	0.0281719					J	22	0.0738429	0.0640018	0.053418		-0.00264596	-0.00255311	0
J	23	Sample X239	7465	8178	8170					J	23	-0.0473027	-0.00385018	-0.00434613					J	23	0	0	0		0	0	0
J	24	Sample X240	8814	8112	7830					J	24	0.0362082	-0.00793595	-0.0252461					J	24	0	0	0		0	0	0
K	1	Sample X241	33787	35910	37636					K	1	4.24308	5.33651	6.52445					K	1	4.10214	5.22713	6.41987		0.298185	0.289717	0
K	2	Sample X242	33512	35914	37701					K	2	4.12326	5.3389	6.57623					K	2	4.08763	5.32187	6.55326		0.307848	0.308205	0
K	3	Sample X243	31797	33363	35562					K	3	3.46206	4.06009	5.13374					K	3	3.32112	3.95071	5.02916		0.269611	0.213505	0
K	4	Sample X244	29013	33202	35788					K	4	2.62936	3.99317	5.26421					K	4	2.59373	3.97614	5.24124		0.316277	0.330939	0
K	5	Sample X245	28805	32053	36419					K	5	2.57633	3.5523	5.65316					K	5	2.43539	3.44293	5.54858		0.526414	0.389149	0
K	6	Sample X246	26076	32078	35343					K	6	1.96937	3.56126	5.0114					K	6	1.93374	3.54423	4.98843		0.361051	0.381837	0
K	7	Sample X247	26115	30614	35787					K	7	1.97703	3.07755	5.26363					K	7	1.83609	2.96817	5.15905		0.547719	0.41537	0
K	8	Sample X248	24763	30792	36138					K	8	1.72589	3.13222	5.47527					K	8	1.69026	3.11519	5.4523		0.584277	0.470255	0
K	9	Sample X249	21334	29055	34610					K	9	1.19869	2.6402	4.62887					K	9	1.05775	2.53083	4.52429		0.498366	0.433318	0
K	10	Sample X250	21157	29127	34079					K	10	1.17499	2.6589	4.37511					K	10	1.13936	2.64187	4.35214		0.427569	0.401599	0
K	11	Sample X251	18979	26572	32314					K	11	0.906185	2.06874	3.64714					K	11	0.765245	1.95937	3.54256		0.395798	0.347165	0
K	12	Sample X252	17415	25423	31626					K	12	0.73597	1.8449	3.40326					K	12	0.700338	1.82787	3.38029		0.388104	0.334994	0
K	13	Sample X253	18656	24538	29199					K	13	0.869598	1.68678	2.67773					K	13	0.728658	1.5774	2.57315		0.248936	0.230561	0
K	14	Sample X254	16710	23435	28781					K	14	0.664622	1.50498	2.57028					K	14	0.628989	1.48795	2.54731		0.26484	0.23979	0
K	15	Sample X255	15192	19125	23596					K	15	0.521072	0.922981	1.53054					K	15	0.380132	0.813607	1.42596		0.153088	0.130728	0
K	16	Sample X256	14379	19668	24405					K	16	0.449355	0.986914	1.664					K	16	0.413722	0.969884	1.64103		0.167786	0.153413	0
K	17	Sample X257	12489	14945	18141					K	17	0.294948	0.498922	0.812843					K	17	0.154009	0.389548	0.708264		0.0796791	0.0692819	0
K	18	Sample X258	13297	16597	20411					K	18	0.358963	0.653474	1.07832					K	18	0.323331	0.636443	1.05535		0.104727	0.0915025	0
K	19	Sample X259	11247	12535	14568					K	19	0.201881	0.298517	0.465726					K	19	0.0609417	0.189143	0.361147		0.0430011	0.0375256	0
K	20	Sample X260	11703	14006	16651					K	20	0.235332	0.417564	0.658791					K	20	0.1997	0.400534	0.635822		0.0588221	0.0545153	0
K	21	Sample X261	10535	12666	14190					K	21	0.151234	0.308729	0.433161					K	21	0.0102939	0.199354	0.328583		0.0323071	0.0397861	0
K	22	Sample X262	10954	11995	13540					K	22	0.18081	0.257185	0.378784					K	22	0.145177	0.240155	0.355816		0.0289152	0.0263298	0
K	23	Sample X263	10387	9926	9855					K	23	0.14094	0.109374	0.104579					K	23	0	0	0		0	0	0
K	24	Sample X264	8805	8512	8606					K	24	0.0356325	0.0170302	0.0229688					K	24	0	0	0		0	0	0
L	1	Sample X265	25924	29190	32199					L	1	1.93977	2.67536	3.60499					L	1	1.85984	2.60072	3.54039		0.234918	0.210068	0
L	2	Sample X266	28329	32729	35161					L	2	2.45897	3.80417	4.91266					L	2	2.36252	3.71801	4.83141		0.278349	0.30861	0
L	3	Sample X267	22376	24995	28291					L	3	1.34457	1.76698	2.44983					L	3	1.26464	1.69233	2.38523		0.173224	0.140073	0
L	4	Sample X268	24417	30693	34833					L	4	1.66604	3.10168	4.74108					L	4	1.5696	3.01551	4.65983		0.411078	0.386279	0
L	5	Sample X269	19177	22295	25109					L	5	0.929003	1.33282	1.78746					L	5	0.849071	1.25817	1.72286		0.116171	0.109223	0
L	6	Sample X270	21925	28929	33492					L	6	1.28006	2.60781	4.11471					L	6	1.18361	2.52165	4.03345		0.377951	0.35623	0
L	7	Sample X271	16323	19635	22516					L	7	0.626761	0.982961	1.36504					L	7	0.546829	0.908312	1.30044		0.0980319	0.0942013	0
L	8	Sample X272	20939	28176	33307					L	8	1.14621	2.42238	4.03666					L	8	1.04976	2.33621	3.9554		0.404797	0.363205	0
L	9	Sample X273	13365	17033	18311					L	9	0.364483	0.696921	0.831367					L	9	0.28455	0.622271	0.766762		0.0361227	0.0602765	0
L	10	Sample X274	18945	26966	32182					L	10	0.902296	2.15086	3.59881					L	10	0.80585	2.06469	3.51755		0.363216	0.338963	0
L	11	Sample X275	11508	13349	15334					L	11	0.220928	0.363182	0.533952					L	11	0.140996	0.288533	0.469348		0.0452037	0.0410439	0
L	12	Sample X276	16940	25439	30964					L	12	0.687554	1.84787	3.18608					L	12	0.591109	1.7617	3.10482		0.33578	0.314214	0
L	13	Sample X277	10499	11421	11558					L	13	0.148722	0.21455	0.224607					L	13	0.0687901	0.139901	0.160003		0.00502547	0.0114015	0
L	14	Sample X278	15646	22875	28220					L	14	0.562638	1.41854	2.43285					L	14	0.466192	1.33238	2.35159		0.254804	0.235675	0
L	15	Sample X279	10306	10573	10221					L	15	0.135339	0.153889	0.129487					L	15	0.0554068	0.07924	0.0648822		-0.00358946	0.00118442	0
L	16	Sample X280	13452	20639	25300					L	16	0.371575	1.10733	1.82222					L	16	0.275129	1.02116	1.74096		0.179951	0.183229	0
L	17	Sample X281	9658	9945	9502					L	17	0.0913632	0.110661	0.0809915					L	17	0.0114309	0.0360111	0.0163865		-0.00490615	0.000619457	0
L	18	Sample X282	12584	15908	19930					L	18	0.302328	0.587143	1.01861					L	18	0.205882	0.500976	0.937358		0.109095	0.0914345	0
L	19	Sample X283	9445	9706	9335					L	19	0.0772222	0.094571	0.0699786					L	19	-0.00271016	0.0199216	0.0053737		-0.00363699	0.00101048	0
L	20	Sample X284	11399	13890	16606					L	20	0.212942	0.407815	0.654359					L	20	0.116496	0.321648	0.573102		0.0628636	0.0570758	0
L	21	Sample X285	9023	9516	9127					L	21	0.0496497	0.0819189	0.0563908					L	21	-0.0302826	0.00726952	-0.00821416		-0.00387092	0.00275855	0
L	22	Sample X286	10373	11845	13332					L	22	0.13997	0.245916	0.361801					L	22	0.0435241	0.159749	0.280545		0.0301989	0.0296276	0
L	23	Sample X287	9486	9406	9253					L	23	0.0799323	0.0746494	0.0646049					L	23	0	0	0		0	0	0
L	24	Sample X288	9734	9580	9506					L	24	0.0964459	0.0861671	0.0812564					L	24	0	0	0		0	0	0
M	1	Sample X289	29395	31789	34170					M	1	2.72968	3.45928	4.41732					M	1	2.69436	3.43225	4.38934		0.23927	0.211871	0
M	2	Sample X290	31727	35206	38540					M	2	3.43785	4.93683	7.3019					M	2	3.34341	4.86403	7.24953		0.596375	0.488265	0
M	3	Sample X291	26670	28987	32189					M	3	2.0889	2.62267	3.60135					M	3	2.05359	2.59565	3.57337		0.244432	0.189973	0
M	4	Sample X292	29491	35049	38532					M	4	2.7555	4.85317	7.29443					M	4	2.66107	4.78037	7.24207		0.615425	0.572625	0
M	5	Sample X293	24345	28005	35003					M	5	1.6538	2.38212	4.82901					M	5	1.61849	2.35509	4.80103		0.611486	0.397818	0
M	6	Sample X294	25323	33676	38622					M	6	1.82644	4.1942	7.37907					M	6	1.73201	4.12139	7.3267		0.801326	0.699337	0
M	7	Sample X295	21396	26519	31471					M	7	1.20706	2.05792	3.35094					M	7	1.17175	2.03089	3.32296		0.323018	0.268902	0
M	8	Sample X296	23127	29651	35965					M	8	1.45698	2.79911	5.36954					M	8	1.36254	2.72631	5.31717		0.647716	0.494329	0
M	9	Sample X297	19217	27262	31166					M	9	0.93365	2.2145	3.25064					M	9	0.898337	2.18747	3.22266		0.258799	0.290541	0
M	10	Sample X298	15483	22456	28936					M	10	0.547585	1.35624	2.6096					M	10	0.453148	1.28344	2.55723		0.318449	0.263011	0
M	11	Sample X299	16538	23443	28171					M	11	0.647684	1.50625	2.42119					M	11	0.612371	1.47922	2.39321		0.228499	0.222605	0
M	12	Sample X300	14567	18870	23331					M	12	0.465638	0.89375	1.48865					M	12	0.371201	0.820945	1.43628		0.153833	0.133135	0
M	13	Sample X301	14932	22833	25856					M	13	0.497765	1.41221	1.92666					M	13	0.462452	1.38518	1.89867		0.128374	0.179528	0
M	14	Sample X302	12412	15148	17829					M	14	0.288995	0.517102	0.779369					M	14	0.194558	0.444297	0.727001		0.070676	0.0665554	0
M	15	Sample X303	13887	18235	21708					M	15	0.407563	0.82306	1.24977					M	15	0.372251	0.796033	1.22179		0.106439	0.106192	0
M	16	Sample X304	12437	12646	14199					M	16	0.290925	0.307165	0.433928					M	16	0.196488	0.234359	0.381561		0.0368003	0.0231341	0
M	17	Sample X305	11041	13883	16418					M	17	0.187033	0.407228	0.635972					M	17	0.15172	0.3802	0.607991		0.0569476	0.0570339	0
M	18	Sample X306	11069	11562	12172					M	18	0.189042	0.224902	0.270599					M	18	0.0946044	0.152097	0.218231		0.0165337	0.0154534	0
M	19	Sample X307	10232	12250	13661					M	19	0.130243	0.276552	0.388756					M	19	0.0949302	0.249524	0.360775		0.0278127	0.0332305	0
M	20	Sample X308	10153	10452	10223					M	20	0.124824	0.145451	0.129625					M	20	0.0303867	0.0726456	0.0772567		0.00115277	0.00585875	0
M	21	Sample X309	10630	11006	12326					M	21	0.157883	0.184526	0.282376					M	21	0.12257	0.157498	0.254395		0.0242242	0.0164781	0
M	22	Sample X310	10398	10139	10086					M	22	0.141702	0.123866	0.120245					M	22	0.0472649	0.0510604	0.0678773		0.00420421	0.00257656	0
M	23	Sample X311	8800	8670	8685					M	23	0.0353128	0.027028	0.0279812					M	23	0	0	0		0	0	0
M	24	Sample X312	9704	9378	9065					M	24	0.0944372	0.0728054	0.0523679					M	24	0	0	0		0	0	0
N	1	Sample X313	27994	30269	32342					N	1	2.37955	2.97452	3.65749					N	1	2.32218	2.92939	3.62728		0.174474	0.163138	0
N	2	Sample X314	35688	39619	41315					N	2	5.20594	8.42434	10.8191					N	2	5.11477	8.34758	10.7767		0.607279	0.70774	0
N	3	Sample X315	24194	26061	28264					N	3	1.62835	1.96643	2.44336					N	3	1.57099	1.9213	2.41315		0.122962	0.105271	0
N	4	Sample X316	32789	38596	42181					N	4	3.82754	7.35447	12.496					N	4	3.73638	7.27771	12.4536		1.29397	1.08965	0
N	5	Sample X317	20671	22213	26953					N	5	1.11143	1.321	2.1481					N	5	1.05407	1.27587	2.11789		0.210505	0.132978	0
N	6	Sample X318	27927	34564	39197					N	6	2.36397	4.60616	7.95617					N	6	2.2728	4.5294	7.91374		0.846085	0.705117	0
N	7	Sample X319	16668	20245	22402					N	7	0.660469	1.05749	1.34836					N	7	0.603103	1.01236	1.31815		0.0764481	0.0893808	0
N	8	Sample X320	22593	28689	33228					N	8	1.3764	2.54722	4.00388					N	8	1.28523	2.47046	3.96145		0.372747	0.334527	0
N	9	Sample X321	13234	16274	17360					N	9	0.353868	0.622031	0.73029					N	9	0.296502	0.576899	0.700082		0.0307957	0.0504475	0
N	10	Sample X322	17266	22988	28151					N	10	0.720627	1.43569	2.41645					N	10	0.629464	1.35893	2.37402		0.253774	0.21807	0
N	11	Sample X323	11084	12925	13740					N	11	0.190119	0.329136	0.395303					N	11	0.132753	0.284003	0.365095		0.0202728	0.0290427	0
N	12	Sample X324	13640	18082	21590					N	12	0.38702	0.806461	1.2335					N	12	0.295857	0.729701	1.19107		0.115343	0.111902	0
N	13	Sample X325	10431	11525	11873					N	13	0.143992	0.222178	0.248013					N	13	0.0866259	0.177046	0.217805		0.0101897	0.0163974	0
N	14	Sample X326	12098	14285	17466					N	14	0.264975	0.441279	0.741255					N	14	0.173812	0.364519	0.698826		0.0835767	0.0656267	0
N	15	Sample X327	11047	10020	10950					N	15	0.187463	0.11575	0.180525					N	15	0.130097	0.0706179	0.150316		0.0199246	0.00252741	0
N	16	Sample X328	10578	11884	13407					N	16	0.154239	0.248838	0.367902					N	16	0.0630763	0.172078	0.325473		0.0383489	0.0327996	0
N	17	Sample X329	9581	9363	9768					N	17	0.0862336	0.0718186	0.0987261					N	17	0.0288677	0.0266864	0.068518		0.0104579	0.00495629	0
N	18	Sample X330	10954	10203	11084					N	18	0.18081	0.128251	0.190119					N	18	0.089647	0.0514911	0.14769		0.0240496	0.00725534	0
N	19	Sample X331	8852	8718	8928					N	19	0.0386417	0.0300808	0.0435226					N	19	-0.0187242	-0.0150514	0.0133145		0.00709148	0.00400483	0
N	20	Sample X332	9898	9598	9970					N	20	0.107481	0.0873644	0.112355					N	20	0.016318	0.0106044	0.0699257		0.0148303	0.00670096	0
N	21	Sample X333	9206	9671	9110					N	21	0.0615348	0.0922312	0.0552865					N	21	0.00416892	0.047099	0.0250783		-0.00550517	0.00261368	0
N	22	Sample X334	9621	9476	9529					N	22	0.0888958	0.0792708	0.0827807					N	22	-0.00226715	0.00251078	0.0403515		0.00946017	0.00532733	0
N	23	Sample X335	9142	8953	8720					N	23	0.0573659	0.0451322	0.0302081					N	23	0	0	0		0	0	0
N	24	Sample X336	9655	9438	8911					N	24	0.091163	0.07676	0.0424292					N	24	0	0	0		0	0	0
O	1	Sample X337	44530	42631	42045	43068.7	43869.7	24		O	1	20.2586	13.5452	12.2054					O	1	20.254	13.5659	12.2332		-0.333181	-1.0026	1
O	2	Sample X338	46498	42322	42789					O	2	37.6357	12.8097	13.9492					O	2	37.6372	12.7971	13.9712		0.293524	-2.95824	1
O	3	Sample X339	42404	39003	39459	40288.7	41402.7	12		O	3	12.9983	7.7541	8.242					O	3	12.9937	7.77482	8.26986		0.12376	-0.590484	0
O	4	Sample X340	43539	40402	40267					O	4	16.1811	9.41363	9.23052					O	4	16.1826	9.401	9.25253		-0.0371181	-0.866257	0
O	5	Sample X341	37618	36311	35908	36612.3	36597.7	6		O	5	6.51022	5.58386	5.33531					O	5	6.50567	5.60459	5.36318		-0.0603533	-0.142812	0
O	6	Sample X342	38221	36020	35552					O	6	7.01278	5.40285	5.12807					O	6	7.01427	5.39022	5.15008		-0.0600364	-0.233024	0
O	7	Sample X343	30703	29101	28863	29555.7	31101.3	3		O	7	3.10475	2.65213	2.59101					O	7	3.1002	2.67286	2.61887		-0.0134963	-0.0601662	0
O	8	Sample X344	32750	30516	30038					O	8	3.81233	3.04789	2.90762					O	8	3.81382	3.03526	2.92963		-0.0264083	-0.110524	0
O	9	Sample X345	23645	23053	23311	23336.3	21670.7	1.5		O	9	1.53838	1.44561	1.48552					O	9	1.53383	1.46634	1.51338		0.0117606	-0.00255601	0
O	10	Sample X346	21521	21624	21867					O	10	1.22406	1.23818	1.27191					O	10	1.22555	1.22555	1.29392		0.0170935	0.00854715	0
O	11	Sample X347	17905	17385	17652	17647.3	17428.7	0.75		O	11	0.787461	0.73287	0.760675					O	11	0.782913	0.753596	0.788539		0.00873579	0.000703314	0
O	12	Sample X348	18185	17240	16861					O	12	0.817618	0.717965	0.679641					O	12	0.81911	0.705339	0.701651		-0.000921948	-0.0146823	0
O	13	Sample X349	13660	13253	13084	13332.3	12960.7	0.375		O	13	0.388673	0.355403	0.341809					O	13	0.384125	0.37613	0.369674		-0.00161392	-0.00180636	0
O	14	Sample X350	13347	12800	12735					O	14	0.36302	0.31925	0.314137					O	14	0.364511	0.306625	0.336148		0.00738073	-0.00354548	0
O	15	Sample X351	11861	11162	11035	11352.7	10899.7	0.1875		O	15	0.247114	0.195735	0.186603					O	15	0.242566	0.216462	0.214467		-0.000498541	-0.00351229	0
O	16	Sample X352	11177	11178	10344					O	16	0.196818	0.19689	0.137964					O	16	0.198309	0.184264	0.159974		-0.00607244	-0.00479187	0
O	17	Sample X353	11322	11082	11320	11241.3	9450	0.09375		O	17	0.207328	0.189975	0.207182					O	17	0.202779	0.210702	0.235047		0.00608627	0.00403344	0
O	18	Sample X354	9665	9664	9021					O	18	0.0918305	0.0917638	0.0495205					O	18	0.0933223	0.0791381	0.0715313		-0.00190171	-0.00272388	0
O	19	Sample X355	9532	9115	9227	9291.33	8811.67	0.046875		O	19	0.0829797	0.0556112	0.0629057					O	19	0.0784314	0.0763378	0.0907704		0.00360816	0.00154238	0
O	20	Sample X356	9001	9002	8432					O	20	0.0482282	0.0482928	0.0119976					O	20	0.04972	0.0356672	0.0340085		-0.000414686	-0.00196395	0
O	21	Sample X357	8391	8872	8440	8567.67	8558.33	0.0234375		O	21	0.00942613	0.0399244	0.0125					O	21	0.00487785	0.060651	0.0403648		-0.00507156	0.00443587	0
O	22	Sample X358	8891	8596	8188					O	22	0.0411441	0.0223357	-0.00322997					O	22	0.0426359	0.00971012	0.0187809		0.00226768	-0.00298188	0
O	23	Sample X359	8313	7904	7787	8001.33	8180.33	0		O	23	0.00454829	-0.0207266	-0.0278648					O	23	0	0	0		0	0	0
O	24	Sample X360	8216	8442	7883					O	24	-0.00149178	0.0126256	-0.0220108					O	24	0	0	0		0	0	0
									0			#DIV/0!	#DIV/0!
									0			#DIV/0!	#DIV/0!
									0			#DIV/0!	#DIV/0!
									0			#DIV/0!	#DIV/0!
									0			#DIV/0!	#DIV/0!
									0			#DIV/0!	#DIV/0!
									0			#DIV/0!	#DIV/0!
									0			#DIV/0!	#DIV/0!
[truncated: 12 more columns]
