# Supplementary material for: PDZ-directed substrate recruitment is the primary determinant of specific 4E-BP1 dephosphorylation by PP1-Neurabin
Source: eLife journal article supplement (doi:10.7554/elife.103403), 2024-11-20
Supplement: fig5-data1 [file repli4.xlsx]

## Sheet: All Cycles
Well Row	Well Col	Content	Raw Data (425-10/460-20)	Raw Data (425-10/460-20)	Raw Data (425-10/460-20)				convert to phosphate	Well Row	Well Col	Raw Data (425-10/460-20)	Raw Data (425-10/460-20)	Raw Data (425-10/460-20)				normalize to the lasst column	Well Row	Well Col	Raw Data (425-10/460-20)	Raw Data (425-10/460-20)	Raw Data (425-10/460-20)								PP1-Neb 0.25 nM																PP1-Ph3 2.5 nM
		Time [s]	0	240	480							0	4	8							0	4	8								V1	V2	V3	V4	V5	V6	V7	V8	4ebp-pdz	4ebp-sgs	irsp53-pdz	irsp53-sgs	L5A-PDZ	L5A-SGS			V1	V2	V3
A	1	Sample X1	25445	37010	41890				0.6834	A	1	1.84898	6.05433	11.8875					A	1	0.559876	5.91554	11.6455		1.43248	1.3857	0			400	1.3857	0.0995833	0.0693166	0.0507359	0.0606554	1.48471	0.240112	0.738635	0.0985166	0.0198974	0.169911	0.111795	0.156769	0.0977117			4.65734	0.156642	0.152496
A	2	Sample X2	31570	45363	46676					A	2	3.38425	25.3679	40.6104					A	2	3.25737	25.2885	40.5161		3.80691	4.65734	1			200	1.01613	0.092578	0.0713513	0.0478809	0.0575186	1.17356	0.262264	0.775749	0.106593	0.0415418	0.295942	0.125247	0.237991	0.106077			18.0198	0.103583	0.138731
A	3	Sample X3	23414	36449	40639					A	3	1.50167	5.67262	9.74925					A	3	1.37815	5.53383	9.50722		0.993349	1.01613	0			100	0.900462	0.0863291	0.0631444	0.031687	0.0490908	0.659706	0.186602	0.527166	0.0903389	0.0119631	0.275607	0.0937617	0.336529	0.0638358			2.29143	0.0544827	0.0920266
A	4	Sample X4	29676	46183	48386					A	4	2.80599	33.2672	146.932					A	4	2.67911	33.1878	146.838		28.4125	18.0198	1			50	0.823869	0.0835502	0.0531594	0.0344255	0.0493496	0.567043	0.250676	0.569825	0.0807366	0.0103722	0.318131	0.0631533	0.253031	0.0383408			1.15497	0.0479639	0.0589432
A	5	Sample X5	22528	35271	39842					A	5	1.36681	4.97203	8.68901					A	5	1.24329	4.83323	8.44698		0.903436	0.900462	0			25	0.574171	0.0818956	0.0714719	0.0486242	0.0386065	0.466869	0.170005	0.650299	0.0542805	0.00545921	0.40492	0.0263184	0.265452	0.017218			0.512398	0.0151225	0.0283111
A	6	Sample X6	24284	41581	44466					A	6	1.64348	11.293	19.9424					A	6	1.5166	11.2136	19.8481		2.15862	2.29143	1			12.5	0.392108	0.0756942	0.0554373	0.0195642	0.0382648	0.311124	0.160592	0.389346	0.0561783	0.00654919	0.248877	0.00999932	0.216714	0.00894458			0.262577	0.0129771	0.00481517
A	7	Sample X7	21423	32764	39163					A	7	1.21072	3.81778	7.92018					A	7	1.08719	3.67899	7.67815		0.999789	0.823869	0			6.25	0.167799	0.0695659	0.0455943	0.0325212	0.0458158	0.248558	0.124221	0.260827	0.0380796	0.00501287	0.158571	-0.00625207	0.134371	0.00689349			0.110723	0.00953706	0.0100328
A	8	Sample X8	17916	34479	40805					A	8	0.788636	4.56455	9.99578					A	8	0.661756	4.48515	9.90148		1.35408	1.15497	0			3.125	0.149785	0.0439991	0.0338088	0.0161273	0.0337083	0.117808	0.091579	0.16215	0.0267551	-0.000366711	0.100817	0.00502661	0.094774	0.00153245			0.0739655	0.00238381	-0.00409501
A	9	Sample X9	19288	31626	36420					A	9	0.941928	3.40326	5.65381					A	9	0.818404	3.26446	5.41178		0.536828	0.574171	0			1.5625	0.0623325	0.0350182	0.0185382	0.00970757	0.0203369	0.0598496	0.05818	0.0956526	0.0106477	0.000312443	0.0587091	0.00701835	0.0588199	-0.000964655			0.0315497	-0.000887326	0.00457012
A	10	Sample X10	15065	27736	34503					A	10	0.509643	2.32008	4.57625					A	10	0.382764	2.24068	4.48195		0.560317	0.512398	0			0.78125	0.0403279	0.026633	0.0150734	0.00723395	0.0163956	0.0437761	0.0327524	0.0473615	0.0040428	0.00233947	0.021066	-0.0181101	0.0268559	-0.00299487			0.0170521	-0.00038435	0.00135337
A	11	Sample X11	16628	26955	33002					A	11	0.656524	2.14852	3.9119					A	11	0.533	2.00973	3.66987		0.415034	0.392108	0			0.390625	0.00702993	0.00792509	0.00760926	0.00131185	0.00528752	0.0462867	0.0158608	0.0230638	-0.000255753	-0.00136408	0.00860375	0.00644303	0.0127169	0.000109938			0.0104397	0.00368749	-0.00166599
A	12	Sample X12	13181	22405	28156					A	12	0.349596	1.34879	2.41764					A	12	0.222717	1.26939	2.32333		0.263486	0.262577	0			0	0	0	0	0	0	0	0	0	0	0	0	0	0	0			0	0	0
A	13	Sample X13	16021	22356	26523					A	13	0.597832	1.34166	2.05873					A	13	0.474309	1.20287	1.8167		0.153457	0.167799	0
A	14	Sample X14	11898	16122	20606					A	14	0.249888	0.607448	1.1031					A	14	0.123008	0.528045	1.0088		0.120188	0.110723	0				3	27	51	75	99	123	147	171	195	219	243	267	291	315	339		3	27	51
A	15	Sample X15	15492	21013	25532					A	15	0.548413	1.15593	1.8652					A	15	0.424889	1.01713	1.62317		0.151508	0.149785	0				PP1-Neb 0.25 nM																PP1-Ph3 2.5 nM
A	16	Sample X16	11245	13860	17654					A	16	0.201736	0.405304	0.760885					A	16	0.0748573	0.325901	0.666581		0.0851701	0.0739655	0				V1	V2	V3	V4	V5	V6	V7	V8	4ebp-pdz	4ebp-sgs	irsp53-pdz	irsp53-sgs	L5A-PDZ	L5A-SGS			V1	V2	V3
A	17	Sample X17	14268	16461	20241					A	17	0.439823	0.640159	1.05699					A	17	0.316299	0.501365	0.814959		0.0783984	0.0623325	0		0	400	1.3857	0.0995833	0.0693166	0.0507359	0.0606554	1.48471	0.240112	0.738635	0.0985166	0.0198974	0.169911	0.111795	0.156769	0.0977117			na	0.156642	0.152496
A	18	Sample X18	11761	12762	14496					A	18	0.239646	0.316259	0.459468					A	18	0.112767	0.236856	0.365165		0.0320772	0.0315497	0		2	200	1.01613	0.092578	0.0713513	0.0478809	0.0575186	1.17356	0.262264	0.775749	0.106593	0.0415418	0.295942	0.125247	0.237991	0.106077			na	0.103583	0.138731
A	19	Sample X19	13512	15569	18185					A	19	0.376487	0.555509	0.817618					A	19	0.252963	0.416715	0.575586		0.0397178	0.0403279	0		4	100	0.900462	0.0863291	0.0631444	0.031687	0.0490908	0.659706	0.186602	0.527166	0.0903389	0.0119631	0.275607	0.0937617	0.336529	0.0638358			na	0.0544827	0.0920266
A	20	Sample X20	10907	10950	12312					A	20	0.17746	0.180525	0.281301					A	20	0.0505808	0.101121	0.186998		0.0214691	0.0170521	0		6	50	0.823869	0.0835502	0.0531594	0.0344255	0.0493496	0.567043	0.250676	0.569825	0.0807366	0.0103722	0.318131	0.0631533	0.253031	0.0383408			1.15497	0.0479639	0.0589432
A	21	Sample X21	12538	13352	14657					A	21	0.29875	0.363426	0.473497					A	21	0.175226	0.224632	0.231466		0.00170829	0.00702993	0		8	25	0.574171	0.0818956	0.0714719	0.0486242	0.0386065	0.466869	0.170005	0.650299	0.0542805	0.00545921	0.40492	0.0263184	0.265452	0.017218			0.512398	0.0151225	0.0283111
A	22	Sample X22	11388	10897	12073					A	22	0.212138	0.176748	0.26308					A	22	0.0852592	0.0973452	0.168777		0.017858	0.0104397	0		10	12.5	0.392108	0.0756942	0.0554373	0.0195642	0.0382648	0.311124	0.160592	0.389346	0.0561783	0.00654919	0.248877	0.00999932	0.216714	0.00894458			0.262577	0.0129771	0.00481517
A	23	Sample X23	10134	10356	11793					A	23	0.123524	0.138794	0.242031					A	23	0	0	0		0	0	0		12	6.25	0.167799	0.0695659	0.0455943	0.0325212	0.0458158	0.248558	0.124221	0.260827	0.0380796	0.00501287	0.158571	-0.00625207	0.134371	0.00689349			0.110723	0.00953706	0.0100328
A	24	Sample X24	10183	9478	9702					A	24	0.126879	0.0794031	0.0943034					A	24	0	0	0		0	0	0		14	3.125	0.149785	0.0439991	0.0338088	0.0161273	0.0337083	0.117808	0.091579	0.16215	0.0267551	-0.000366711	0.100817	0.00502661	0.094774	0.00153245			0.0739655	0.00238381	-0.00409501
B	1	Sample X25	13744	17798	21049					B	1	0.395635	0.77608	1.16067					B	1	0.237471	0.664199	1.03414		0.0924846	0.0995833	0		16	1.5625	0.0623325	0.0350182	0.0185382	0.00970757	0.0203369	0.0598496	0.05818	0.0956526	0.0106477	0.000312443	0.0587091	0.00701835	0.0588199	-0.000964655			0.0315497	-0.000887326	0.00457012
B	2	Sample X26	12929	19248	23734					B	2	0.329453	0.937259	1.5527					B	2	0.272282	0.894187	1.52542		0.157808	0.156642	0		18	0.78125	0.0403279	0.026633	0.0150734	0.00723395	0.0163956	0.0437761	0.0327524	0.0473615	0.0040428	0.00233947	0.021066	-0.0181101	0.0268559	-0.00299487			0.0170521	-0.00038435	0.00135337
B	3	Sample X27	14487	17589	21102					B	3	0.458688	0.754071	1.16768					B	3	0.300524	0.642191	1.04115		0.0997393	0.092578	0		20	0.390625	0.00702993	0.00792509	0.00760926	0.00131185	0.00528752	0.0462867	0.0158608	0.0230638	-0.000255753	-0.00136408	0.00860375	0.00644303	0.0127169	0.000109938			0.0104397	0.00368749	-0.00166599
B	4	Sample X28	11165	15856	19733					B	4	0.195951	0.582249	0.994726					B	4	0.138781	0.539177	0.967444		0.107067	0.103583	0		22	0	0	0	0	0	0	0	0	0	0	0	0	0	0	0			0	0	0
B	5	Sample X29	13314	16572	19936					B	5	0.360341	0.651018	1.01935					B	5	0.202177	0.539137	0.89281		0.0884182	0.0863291	0
B	6	Sample X30	10459	13581	15530					B	6	0.145938	0.382156	0.551911					B	6	0.0887669	0.339083	0.524628		0.0463863	0.0544827	0
B	7	Sample X31	11858	15545	18781					B	7	0.246889	0.553294	0.883664					B	7	0.0887258	0.441413	0.757128		0.0789286	0.0835502	0
B	8	Sample X32	10188	12146	14743					B	8	0.127222	0.268621	0.481044					B	8	0.0700512	0.225548	0.453762		0.0570534	0.0479639	0
B	9	Sample X33	12967	15265	19408					B	9	0.332473	0.52768	0.95601					B	9	0.174309	0.4158	0.829473		0.103418	0.0818956	0
B	10	Sample X34	10410	10877	11680					B	10	0.142534	0.175326	0.233626					B	10	0.0853634	0.132254	0.206344		0.0185225	0.0151225	0
B	11	Sample X35	11725	14620	18123					B	11	0.236967	0.470261	0.810893					B	11	0.0788033	0.358381	0.684357		0.081494	0.0756942	0
B	12	Sample X36	9924	9787	10987					B	12	0.109239	0.100002	0.183167					B	12	0.0520681	0.0569297	0.155885		0.0247388	0.0129771	0
B	13	Sample X37	11474	13724	17486					B	13	0.218432	0.393974	0.743332					B	13	0.0602685	0.282094	0.616796		0.0836754	0.0695659	0
B	14	Sample X38	9606	9666	10291					B	14	0.0878968	0.0918973	0.134305					B	14	0.030726	0.048825	0.107022		0.0145494	0.00953706	0
B	15	Sample X39	11928	13490	15752					B	15	0.25214	0.374684	0.572506					B	15	0.0939767	0.262804	0.44597		0.0457915	0.0439991	0
B	16	Sample X40	9748	9170	9586					B	16	0.0973843	0.0591882	0.0865661					B	16	0.0402135	0.0161159	0.059284		0.010792	0.00238381	0
B	17	Sample X41	10538	12007	13796					B	17	0.151443	0.25809	0.399961					B	17	-0.00672056	0.14621	0.273425		0.0318038	0.0350182	0
B	18	Sample X42	10044	9401	9493					B	18	0.117383	0.0743199	0.0803956					B	18	0.0602121	0.0312476	0.0531135		0.00546647	-0.000887326	0
B	19	Sample X43	10859	11872	13254					B	19	0.174047	0.247938	0.355484					B	19	0.0158836	0.136058	0.228947		0.0232224	0.026633	0
B	20	Sample X44	9467	9264	8962					B	20	0.0786757	0.0653245	0.0457121					B	20	0.0215049	0.0222522	0.0184301		-0.000955536	-0.00038435	0
B	21	Sample X45	11795	12323	12216					B	21	0.242181	0.282145	0.273954					B	21	0.0840168	0.170265	0.147418		-0.0057119	0.00792509	0
B	22	Sample X46	9072	9048	9066					B	22	0.0528214	0.051267	0.0524326					B	22	-0.00434939	0.0081947	0.0251506		0.00423897	0.00368749	0
B	23	Sample X47	10634	9963	10178					B	23	0.158164	0.11188	0.126536					B	23	0	0	0		0	0	0
B	24	Sample X48	9139	8921	8674					B	24	0.0571708	0.0430723	0.0272821					B	24	0	0	0		0	0	0
C	1	Sample X49	13789	17120	19665					C	1	0.399378	0.705732	0.986554					C	1	0.348047	0.638574	0.90258		0.0660013	0.0693166	0
C	2	Sample X50	14516	19804	24484					C	2	0.461204	1.0033	1.6775					C	2	0.457529	1.00212	1.6775		0.168846	0.152496	0
C	3	Sample X51	12994	16343	19255					C	3	0.334622	0.628696	0.938075					C	3	0.28329	0.561538	0.854101		0.0731406	0.0713513	0
C	4	Sample X52	12620	18373	22827					C	4	0.305134	0.838174	1.4113					C	4	0.30146	0.836992	1.4113		0.143578	0.138731	0
C	5	Sample X53	13713	15472	19193					C	5	0.393062	0.546575	0.93086					C	5	0.34173	0.479417	0.846885		0.0918672	0.0631444	0
C	6	Sample X54	12271	16131	19865					C	6	0.278159	0.608308	1.0107					C	6	0.274484	0.607126	1.0107		0.100893	0.0920266	0
C	7	Sample X55	12325	15540	17456					C	7	0.282299	0.552832	0.740218					C	7	0.230967	0.485675	0.656243		0.042642	0.0531594	0
C	8	Sample X56	10279	13148	16058					C	8	0.133477	0.346942	0.601348					C	8	0.129803	0.34576	0.601348		0.0638971	0.0589432	0
C	9	Sample X57	11747	15079	18417					C	9	0.238603	0.510899	0.843022					C	9	0.187272	0.443741	0.759047		0.0788266	0.0714719	0
C	10	Sample X58	10117	11470	13126					C	10	0.122362	0.218139	0.345176					C	10	0.118687	0.216957	0.345176		0.0320547	0.0283111	0
C	11	Sample X59	11941	13819	17350					C	11	0.253118	0.401879	0.729259					C	11	0.201786	0.334721	0.645284		0.0776408	0.0554373	0
C	12	Sample X60	10249	9937	10749					C	12	0.131412	0.110119	0.166259					C	12	0.127737	0.108937	0.166259		0.0143305	0.00481517	0
C	13	Sample X61	11189	13311	15992					C	13	0.197684	0.360098	0.595082					C	13	0.146353	0.29294	0.511107		0.0545418	0.0455943	0
C	14	Sample X62	8700	9377	9869					C	14	0.0289351	0.0727396	0.105523					C	14	0.0252604	0.0715574	0.105523		0.0084914	0.0100328	0
C	15	Sample X63	11047	12697	14851					C	15	0.187463	0.311156	0.490576					C	15	0.136131	0.243998	0.406602		0.0406509	0.0338088	0
C	16	Sample X64	9535	9989	8978					C	16	0.0831787	0.113644	0.0467438					C	16	0.0795039	0.112462	0.0467438		-0.0164295	-0.00409501	0
C	17	Sample X65	11157	12205	13510					C	17	0.195374	0.273115	0.376323					C	17	0.144043	0.205957	0.292348		0.0215978	0.0185382	0
C	18	Sample X66	8636	8653	9148					C	18	0.0248699	0.0259485	0.0577562					C	18	0.0211952	0.0247663	0.0577562		0.00824748	0.00457012	0
C	19	Sample X67	10396	11525	12487					C	19	0.141563	0.222178	0.294794					C	19	0.0902317	0.15502	0.210819		0.0139496	0.0150734	0
C	20	Sample X68	8540	8540	8653					C	20	0.0187963	0.0187963	0.0259485					C	20	0.0151215	0.017614	0.0259485		0.00208362	0.00135337	0
C	21	Sample X69	9925	10633	11260					C	21	0.109307	0.158093	0.202824					C	21	0.0579749	0.0909355	0.118849		0.00697836	0.00760926	0
C	22	Sample X70	9458	8982	9199					C	22	0.0780809	0.0470018	0.0610782					C	22	0.0744061	0.0458196	0.0610782		0.00381465	-0.00166599	0
C	23	Sample X71	9049	9292	9547					C	23	0.0513317	0.0671579	0.0839749					C	23	0	0	0		0	0	0
C	24	Sample X72	8299	8259	8240					C	24	0.00367475	0.00118223	0					C	24	0	0	0		0	0	0
D	1	Sample X73	12448	14257	17210					D	1	0.291775	0.438882	0.714898					D	1	0.267096	0.390072	0.672983		0.0707277	0.0507359	0
D	2	Sample X74	10776	14017	16764					D	2	0.168166	0.418492	0.669976					D	2	0.166548	0.413881	0.677109		0.0658069	0.0638201	0
D	3	Sample X75	11679	14018	16396					D	3	0.233552	0.418576	0.633834					D	3	0.208872	0.369767	0.591919		0.0555382	0.0478809	0
D	4	Sample X76	10731	13438	16296					D	4	0.164988	0.370432	0.624153					D	4	0.16337	0.365821	0.631285		0.0663662	0.0584894	0
D	5	Sample X77	11963	13765	15241					D	5	0.254773	0.397381	0.525504					D	5	0.230094	0.348571	0.483589		0.0337545	0.031687	0
D	6	Sample X78	9762	11549	13066					D	6	0.0983234	0.223944	0.340369					D	6	0.0967053	0.219334	0.347501		0.0320418	0.0313495	0
D	7	Sample X79	11397	13459	15018					D	7	0.212796	0.372147	0.505435					D	7	0.188116	0.323338	0.46352		0.0350455	0.0344255	0
D	8	Sample X80	9147	10174	10596					D	8	0.0576911	0.126262	0.155499					D	8	0.0560731	0.121652	0.162632		0.010245	0.0133198	0
D	9	Sample X81	10740	12650	15745					D	9	0.165623	0.307477	0.571852					D	9	0.140944	0.258668	0.529937		0.0678174	0.0486242	0
D	10	Sample X82	8948	8729	9313					D	10	0.0448101	0.0307814	0.0685347					D	10	0.0431921	0.0261707	0.0756669		0.0123741	0.00405936	0
D	11	Sample X83	13255	13955	15283					D	11	0.355565	0.41327	0.529314					D	11	0.330885	0.36446	0.487399		0.0307347	0.0195642	0
D	12	Sample X84	8562	8691	9026					D	12	0.0201856	0.0283627	0.0498437					D	12	0.0185675	0.023752	0.0569759		0.00830599	0.00480105	0
D	13	Sample X85	9502	11646	13290					D	13	0.0809915	0.231106	0.358396					D	13	0.0563118	0.182297	0.316481		0.0335461	0.0325212	0
D	14	Sample X86	8695	8944	8824					D	14	0.0286171	0.0445525	0.0368482					D	14	0.026999	0.0399418	0.0439804		0.00100964	0.00212268	0
D	15	Sample X87	10136	11190	12163					D	15	0.123661	0.197757	0.269914					D	15	0.0989809	0.148947	0.227999		0.019763	0.0161273	0
D	16	Sample X88	8486	8492	8775					D	16	0.0153924	0.0157702	0.0337154					D	16	0.0137744	0.0111595	0.0408476		0.00742204	0.00338416	0
D	17	Sample X89	9661	10329	11033					D	17	0.0915635	0.136927	0.186459					D	17	0.0668838	0.0881175	0.144544		0.0141067	0.00970757	0
D	18	Sample X90	8143	8241	8521					D	18	-0.00601852	6.21955e-05	0.0175976					D	18	-0.00763659	-0.00454851	0.0247298		0.00731958	0.0040458	0
D	19	Sample X91	9276	10205	10391					D	19	0.0661099	0.128388	0.141217					D	19	0.0414302	0.0795788	0.0993019		0.00493075	0.00723395	0
D	20	Sample X92	8621	9052	8605					D	20	0.023919	0.0515259	0.0229055					D	20	0.022301	0.0469152	0.0300377		-0.00421938	0.000967095	0
D	21	Sample X93	8994	9121	9419					D	21	0.0477763	0.0560009	0.0755064					D	21	0.0230966	0.00719132	0.0335914		0.00660002	0.00131185	0
D	22	Sample X94	8791	8924	8849					D	22	0.0347375	0.0432653	0.0384495					D	22	0.0331194	0.0386546	0.0455817		0.00173178	0.00155778	0
D	23	Sample X95	8633	9010	8903					D	23	0.0246797	0.0488096	0.041915					D	23	0	0	0		0	0	0
D	24	Sample X96	8266	8314	8125					D	24	0.00161807	0.0046107	-0.00713222					D	24	0	0	0		0	0	0
E	1	Sample X97	11508	14696	17110					E	1	0.220928	0.476915	0.704717					E	1	0.253105	0.518995	0.738348		0.0548381	0.0606554	0
E	2	Sample X98	21871	31017	32994					E	2	1.27247	3.20288	3.90869					E	2	1.33785	3.26838	3.98523		0.179215	0.330923	0
E	3	Sample X99	10446	13731	16083					E	3	0.145034	0.394555	0.603728					E	3	0.177211	0.436636	0.637359		0.0501808	0.0575186	0
E	4	Sample X100	19678	29806	32797					E	4	0.988114	2.84205	3.83067					E	4	1.05349	2.90755	3.90721		0.249917	0.356715	0
E	5	Sample X101	10702	13544	15555					E	5	0.162944	0.379113	0.554216					E	5	0.195121	0.421194	0.587847		0.0416634	0.0490908	0
E	6	Sample X102	17484	27687	30101					E	6	0.743124	2.30895	2.9257					E	6	0.808504	2.37445	3.00225		0.15695	0.274218	0
E	7	Sample X103	10327	13366	15292					E	7	0.136789	0.364564	0.530131					E	7	0.168966	0.406645	0.563762		0.0392795	0.0493496	0
E	8	Sample X104	13830	22514	24609					E	8	0.402797	1.36475	1.69904					E	8	0.468177	1.43025	1.77559		0.0863348	0.163426	0
E	9	Sample X105	10051	12694	14097					E	9	0.11786	0.310921	0.425257					E	9	0.150036	0.353001	0.458888		0.0264718	0.0386065	0
E	10	Sample X106	11646	17811	23043					E	10	0.231106	0.777458	1.44408					E	10	0.296486	0.842956	1.52063		0.169418	0.153018	0
E	11	Sample X107	11013	12150	14841					E	11	0.185027	0.268925	0.489691					E	11	0.217204	0.311006	0.523322		0.0530792	0.0382648	0
E	12	Sample X108	8904	12978	15456					E	12	0.0419793	0.333348	0.545106					E	12	0.107359	0.398846	0.621652		0.0557015	0.0642865	0
E	13	Sample X109	9184	11787	14096					E	13	0.0601003	0.241584	0.425173					E	13	0.092277	0.283664	0.458804		0.0437849	0.0458158	0
E	14	Sample X110	8009	10470	13043					E	14	-0.014286	0.146703	0.33853					E	14	0.0510939	0.212201	0.415076		0.0507188	0.0454978	0
E	15	Sample X111	9786	11231	13410					E	15	0.0999349	0.200722	0.368147					E	15	0.132112	0.242803	0.401778		0.0397438	0.0337083	0
E	16	Sample X112	7625	8937	10804					E	16	-0.0376818	0.0441018	0.170147					E	16	0.0276981	0.1096	0.246693		0.0342733	0.0273744	0
E	17	Sample X113	8838	9584	11207					E	17	0.0377446	0.0864331	0.198986					E	17	0.0699214	0.128514	0.232617		0.0260257	0.0203369	0
E	18	Sample X114	7136	7931	8894					E	18	-0.0668549	-0.0190736	0.0413368					E	18	-0.00147495	0.0464243	0.117882		0.0178645	0.0149197	0
E	19	Sample X115	8656	9594	10601					E	19	0.0261389	0.0870982	0.15585					E	19	0.0583157	0.129179	0.189481		0.0150755	0.0163956	0
E	20	Sample X116	7327	7627	8392					E	20	-0.0555414	-0.0375611	0.00948879					E	20	0.0098385	0.0279369	0.0860344		0.0145244	0.00952449	0
E	21	Sample X117	8029	8295	8682					E	21	-0.0130555	0.00342528	0.0277905					E	21	0.0191213	0.0455058	0.0614215		0.00397892	0.00528752	0
E	22	Sample X118	8628	8648	8807					E	22	0.0243627	0.0256312	0.0357604					E	22	0.0897426	0.0911291	0.112306		0.00529423	0.00282043	0
E	23	Sample X119	7716	7552	7692					E	23	-0.0321768	-0.0420805	-0.033631					E	23	0	0	0		0	0	0
E	24	Sample X120	7161	7159	6971					E	24	-0.0653799	-0.065498	-0.0765456					E	24	0	0	0		0	0	1
F	1	Sample X121	29868	39742	43075					F	1	2.85942	8.56876	14.7345					F	1	2.65688	8.4703	14.5345		1.51606	1.48471	0
F	2	Sample X122	34310	43848	45120					F	2	4.48326	17.2868	23.6554					F	2	4.39016	17.2441	23.6163		1.59303	2.40326	1
F	3	Sample X123	26418	38040	41651					F	3	2.03742	6.85616	11.4233					F	3	1.83489	6.7577	11.2233		1.11641	1.17356	0
F	4	Sample X124	26173	38917	42300					F	4	1.98847	7.66699	12.7599					F	4	1.89537	7.62436	12.7209		1.27412	1.35319	0
F	5	Sample X125	24105	34692	38078					F	5	1.6135	4.66973	6.88861					F	5	1.41096	4.57127	6.68861		0.529335	0.659706	0
F	6	Sample X126	22897	37028	40026					F	6	1.42187	6.06717	8.91721					F	6	1.32877	6.02455	8.87812		0.713394	0.943669	0
F	7	Sample X127	23049	32780	36903					F	7	1.445	3.82402	5.97881					F	7	1.24247	3.72557	5.77882		0.513312	0.567043	0
F	8	Sample X128	17965	29844	34357					F	8	0.793878	2.85268	4.50568					F	8	0.700778	2.81006	4.46659		0.414134	0.470727	0
F	9	Sample X129	20727	29724	35045					F	9	1.11865	2.81925	4.85107					F	9	0.916113	2.72079	4.65107		0.482569	0.466869	0
F	10	Sample X130	15601	23787	30308					F	10	0.558468	1.56128	2.98597					F	10	0.465368	1.51865	2.94688		0.357057	0.31019	0
F	11	Sample X131	17627	25959	31147					F	11	0.758051	1.94655	3.24451					F	11	0.555517	1.8481	3.04451		0.299104	0.311124	0
F	12	Sample X132	12975	18210	22646					F	12	0.333109	0.820337	1.38425					F	12	0.240009	0.777715	1.34516		0.141861	0.138144	0
F	13	Sample X133	17198	23675	29282					F	13	0.713673	1.5432	2.6996					F	13	0.511139	1.44474	2.4996		0.263716	0.248558	0
F	14	Sample X134	11322	13574	16868					F	14	0.207328	0.381579	0.68034					F	14	0.114228	0.338957	0.64125		0.0755731	0.0658777	0
F	15	Sample X135	14227	17718	22592					F	15	0.436318	0.767621	1.37625					F	15	0.233784	0.669163	1.17625		0.126772	0.117808	0
F	16	Sample X136	11045	12546	13588					F	16	0.18732	0.299372	0.382732					F	16	0.0942198	0.256749	0.343641		0.021723	0.0311777	0
F	17	Sample X137	13096	15504	18198					F	17	0.34277	0.549516	0.819031					F	17	0.140236	0.451059	0.619033		0.0419935	0.0598496	0
F	18	Sample X138	12058	10868	11756					F	18	0.261945	0.174686	0.239273					F	18	0.168845	0.132064	0.200183		0.0170296	0.00391724	0
F	19	Sample X139	13080	14831	16956					F	19	0.341489	0.488807	0.689162					F	19	0.138955	0.390349	0.489164		0.0247036	0.0437761	0
F	20	Sample X140	11591	12354	12281					F	20	0.227041	0.284528	0.278924					F	20	0.133941	0.241905	0.239834		-0.00051789	0.0132366	0
F	21	Sample X141	11718	13662	16088					F	21	0.236447	0.388838	0.604205					F	21	0.0339128	0.290381	0.404206		0.0284564	0.0462867	0
F	22	Sample X142	9013	9623	10216					F	22	0.0490034	0.0890291	0.129144					F	22	-0.0440964	0.046407	0.0900532		0.0109116	0.0167687	0
F	23	Sample X143	11256	9764	11221					F	23	0.202534	0.0984576	0.199998					F	23	0	0	0		0	0	0
F	24	Sample X144	9684	8914	8859					F	24	0.0930998	0.0426221	0.0390905					F	24	0	0	0		0	0	0
G	1	Sample X145	17760	25052	29386					G	1	0.772056	1.7772	2.72727					G	1	0.702668	1.69223	2.62357		0.232835	0.240112	0
G	2	Sample X146	28933	39140	41096					G	2	2.60884	7.89598	10.4527					G	2	2.59395	7.87686	10.4472		0.642584	0.981657	0
G	3	Sample X147	16461	24586	29554					G	3	0.640159	1.69506	2.77259					G	3	0.570771	1.61009	2.66889		0.264699	0.262264	0
G	4	Sample X148	24722	38069	40227					G	4	1.71871	6.88091	9.17734					G	4	1.70382	6.86179	9.17185		0.577515	0.933504	0
G	5	Sample X149	17452	23304	27500					G	5	0.739803	1.48443	2.26693					G	5	0.670415	1.39945	2.16323		0.190944	0.186602	0
G	6	Sample X150	21650	34294	37866					G	6	1.24176	4.47566	6.71037					G	6	1.22687	4.45655	6.70488		0.562082	0.684752	0
G	7	Sample X151	16611	23417	29263					G	7	0.65485	1.50215	2.69458					G	7	0.585463	1.41718	2.59087		0.293425	0.250676	0
G	8	Sample X152	17915	28680	34225					G	8	0.788529	2.54498	4.44308					G	8	0.77364	2.52587	4.43759		0.477931	0.457994	0
G	9	Sample X153	16909	22209	26621					G	9	0.684444	1.32043	2.0788					G	9	0.615057	1.23546	1.9751		0.184909	0.170005	0
G	10	Sample X154	14109	21830	25872					G	10	0.426275	1.26674	1.92973					G	10	0.411386	1.24763	1.92425		0.169156	0.189108	0
G	11	Sample X155	15347	20421	25473					G	11	0.535137	1.07958	1.85419					G	11	0.465749	0.994611	1.75049		0.188969	0.160592	0
G	12	Sample X156	12420	19600	24203					G	12	0.289613	0.978779	1.62986					G	12	0.274724	0.959667	1.62437		0.166177	0.168706	0
G	13	Sample X157	14514	19494	23334					G	13	0.46103	0.966172	1.48912					G	13	0.391642	0.881201	1.38541		0.126053	0.124221	0
G	14	Sample X158	11422	14331	18683					G	14	0.214623	0.445225	0.872626					G	14	0.199734	0.426114	0.867141		0.110257	0.0834259	0
G	15	Sample X159	12645	15507	20377					G	15	0.307087	0.549792	1.07403					G	15	0.237699	0.464821	0.970331		0.126377	0.091579	0
G	16	Sample X160	10920	12349	14931					G	16	0.178386	0.284143	0.497676					G	16	0.163497	0.265031	0.492191		0.05679	0.0410868	0
G	17	Sample X161	11975	14734	17602					G	17	0.255677	0.480253	0.755432					G	17	0.186289	0.395282	0.651729		0.0641118	0.05818	0
G	18	Sample X162	10158	10974	11734					G	18	0.125166	0.182238	0.237636					G	18	0.110277	0.163126	0.232151		0.0172563	0.0152342	0
G	19	Sample X163	10845	13227	14610					G	19	0.173053	0.353303	0.469388					G	19	0.103666	0.268332	0.365685		0.0243383	0.0327524	0
G	20	Sample X164	9626	9731	9987					G	20	0.089229	0.0962449	0.113508					G	20	0.0743401	0.077133	0.108023		0.0077226	0.00421042	0
G	21	Sample X165	10067	11197	12297					G	21	0.11895	0.198263	0.280151					G	21	0.0495618	0.113292	0.176448		0.0157891	0.0158608	0
G	22	Sample X166	8314	8607	9297					G	22	0.0046107	0.0230321	0.0674856					G	22	-0.0102782	0.00392027	0.0620007		0.0145201	0.00903487	0
G	23	Sample X167	9326	9562	9842					G	23	0.0693877	0.0849709	0.103703					G	23	0	0	0		0	0	0
G	24	Sample X168	8478	8545	8328					G	24	0.0148889	0.0191119	0.00548488					G	24	0	0	0		0	0	0
H	1	Sample X169	28169	36491	39566					H	1	2.42072	5.70002	8.36326					H	1	2.3712	5.63352	8.28028		0.661691	0.738635	0
H	2	Sample X170	38378	44025	44801					H	2	7.15292	17.981	21.7025					H	2	7.12252	17.9337	21.6608		0.931775	1.81729	1
H	3	Sample X171	25108	34769	39263					H	3	1.78728	4.70852	8.02673					H	3	1.73776	4.64202	7.94375		0.825433	0.775749	0
H	4	Sample X172	33846	42790	44318					H	4	4.26935	13.9518	19.2436					H	4	4.23895	13.9046	19.202		1.32435	1.87038	1
H	5	Sample X173	22815	32020	36430					H	5	1.4095	3.54052	5.66028					H	5	1.35998	3.47401	5.5773		0.525823	0.527166	0
H	6	Sample X174	28800	40038	42164					H	6	2.57507	8.93242	12.4591					H	6	2.54467	8.88516	12.4174		0.883065	1.23409	0
H	7	Sample X175	22939	31432	36962					H	7	1.42823	3.33792	6.02029					H	7	1.37871	3.27142	5.93731		0.666472	0.569825	0
H	8	Sample X176	22823	35457	39789					H	8	1.4107	5.07459	8.62496					H	8	1.3803	5.02733	8.5833		0.888991	0.900374	0
H	9	Sample X177	21257	31523	37508					H	9	1.18834	3.36839	6.42419					H	9	1.13882	3.30189	6.34121		0.759831	0.650299	0
H	10	Sample X178	16840	29074	34505					H	10	0.677543	2.64512	4.57723					H	10	0.647144	2.59786	4.53557		0.484426	0.486053	0
H	11	Sample X179	19392	28274	33463					H	11	0.954126	2.44575	4.10235					H	11	0.904605	2.37925	4.01937		0.41003	0.389346	0
H	12	Sample X180	13459	21275	27213					H	12	0.372147	1.19075	2.20384					H	12	0.341748	1.14349	2.16218		0.254673	0.227555	0
H	13	Sample X181	15193	24047	29059					H	13	0.521162	1.60387	2.64124					H	13	0.471642	1.53737	2.55826		0.255222	0.260827	0
H	14	Sample X182	11436	15417	21625					H	14	0.215648	0.541532	1.23831					H	14	0.185248	0.494272	1.19666		0.175596	0.126426	0
H	15	Sample X183	14160	21014	24963					H	15	0.430607	1.15606	1.76126					H	15	0.381087	1.08956	1.67828		0.147182	0.16215	0
H	16	Sample X184	10670	13444	18157					H	16	0.160693	0.370922	0.814577					H	16	0.130293	0.323662	0.77292		0.112314	0.0803283	0
H	17	Sample X185	13240	17352	20991					H	17	0.354353	0.729465	1.15303					H	17	0.304832	0.662963	1.07005		0.101773	0.0956526	0
H	18	Sample X186	12275	14826	14915					H	18	0.278465	0.488365	0.496253					H	18	0.248066	0.441105	0.454595		0.00337271	0.0258162	0
H	19	Sample X187	11267	15019	16208					H	19	0.203332	0.505524	0.615683					H	19	0.153811	0.439021	0.532703		0.0234204	0.0473615	0
H	20	Sample X188	10184	11887	11417					H	20	0.126948	0.249062	0.214257					H	20	0.0965486	0.201803	0.172599		-0.00730076	0.00950637	0
H	21	Sample X189	10155	11436	13098					H	21	0.124961	0.215648	0.34293					H	21	0.0754404	0.149145	0.259951		0.0277015	0.0230638	0
H	22	Sample X190	8849	9426	9619					H	22	0.0384495	0.0759681	0.0887626					H	22	0.00805027	0.0287082	0.0471046		0.0045991	0.00488179	0
H	23	Sample X191	9021	9282	9532					H	23	0.0495205	0.0665028	0.0829797					H	23	0	0	0		0	0	0
H	24	Sample X192	8723	8986	8899					H	24	0.0303992	0.0472599	0.041658					H	24	0	0	0		0	0	0
I	1	Sample X193	13975	17255	21563					I	1	0.414952	0.7195	1.2298					I	1	0.387225	0.684124	1.17536		0.122809	0.0985166	0
I	2	Sample X194	15749	23463	28322					I	2	0.572226	1.5094	2.45728					I	2	0.52748	1.5195	2.46454		0.236259	0.242132	0
I	3	Sample X195	13299	17152	21627					I	3	0.359125	0.708985	1.23859					I	3	0.331398	0.673608	1.18415		0.127634	0.106593	0
I	4	Sample X196	13931	21009	26567					I	4	0.411253	1.1554	2.06772					I	4	0.366508	1.1655	2.07498		0.227369	0.213559	0
I	5	Sample X197	12836	16950	20357					I	5	0.32209	0.688559	1.07152					I	5	0.294363	0.653182	1.01707		0.090973	0.0903389	0
I	6	Sample X198	11377	16508	20896					I	6	0.211335	0.644748	1.14058					I	6	0.16659	0.654845	1.14784		0.123249	0.122656	0
I	7	Sample X199	13226	16434	19989					I	7	0.353223	0.637529	1.02583					I	7	0.325496	0.602152	0.971389		0.0923092	0.0807366	0
I	8	Sample X200	10639	13260	15899					I	8	0.158515	0.355969	0.586295					I	8	0.113769	0.366066	0.593551		0.0568713	0.0599728	0
I	9	Sample X201	12622	15107	17705					I	9	0.30529	0.513413	0.76625					I	9	0.277564	0.478036	0.711808		0.0584428	0.0542805	0
I	10	Sample X202	9351	10779	12666					I	10	0.0710297	0.168378	0.308729					I	10	0.026284	0.178476	0.315984		0.0343772	0.0362126	0
I	11	Sample X203	11712	14374	17183					I	11	0.236001	0.448924	0.712143					I	11	0.208274	0.413547	0.6577		0.0610382	0.0561783	0
I	12	Sample X204	10094	9839	10827					I	12	0.120791	0.1035	0.171777					I	12	0.0760453	0.113598	0.179033		0.0163588	0.0128734	0
I	13	Sample X205	11385	13066	15436					I	13	0.211919	0.340369	0.543272					I	13	0.184192	0.304992	0.488829		0.0459593	0.0380796	0
I	14	Sample X206	10274	9025	9861					I	14	0.133133	0.0497791	0.104983					I	14	0.0883873	0.0598764	0.112239		0.0130907	0.00298149	0
I	15	Sample X207	10175	11768	13397					I	15	0.126331	0.240167	0.367087					I	15	0.0986039	0.20479	0.312645		0.0269636	0.0267551	0
I	16	Sample X208	9615	8500	8978					I	16	0.0884961	0.016274	0.0467438					I	16	0.0437504	0.0263713	0.0539997		0.00690709	0.00128116	0
I	17	Sample X209	10048	11166	11625					I	17	0.117655	0.196024	0.229553					I	17	0.0899283	0.160647	0.17511		0.00361582	0.0106477	0
I	18	Sample X210	9808	8816	8614					I	18	0.101414	0.0363362	0.0234755					I	18	0.056668	0.0464335	0.0307314		-0.00392552	-0.00324207	0
I	19	Sample X211	10153	10338	10997					I	19	0.124824	0.137549	0.183882					I	19	0.097097	0.102172	0.129439		0.00681681	0.0040428	0
I	20	Sample X212	9339	7959	8334					I	20	0.0702413	-0.0173571	0.00585972					I	20	0.0254956	-0.00725976	0.0131156		0.00509384	-0.0015475	0
I	21	Sample X213	9397	9432	9768					I	21	0.0740564	0.076364	0.0987261					I	21	0.0463295	0.0409873	0.0442835		0.000824049	-0.000255753	0
I	22	Sample X214	8349	7732	8037					I	22	0.00679728	-0.0312063	-0.0125629					I	22	-0.0379484	-0.021109	-0.00530702		0.0039505	0.00408018	0
I	23	Sample X215	8681	8801	9097					I	23	0.0277269	0.0353767	0.0544426					I	23	0	0	0		0	0	0
I	24	Sample X216	8947	8077	8123					I	24	0.0447457	-0.0100973	-0.0072559					I	24	0	0	0		0	0	0
J	1	Sample X217	10973	11451	12951					J	1	0.182167	0.216746	0.3312					J	1	0.191585	0.235391	0.350764		0.0288433	0.0198974	0
J	2	Sample X218	9864	10991	12413					J	2	0.105186	0.183453	0.289072					J	2	0.206633	0.281743	0.393211		0.0278669	0.0233223	0
J	3	Sample X219	10516	12323	14641					J	3	0.149908	0.282145	0.472097					J	3	0.159326	0.30079	0.49166		0.0477176	0.0415418	0
J	4	Sample X220	8904	9873	11298					J	4	0.0419793	0.105793	0.205583					J	4	0.143426	0.204083	0.309721		0.0264095	0.0207868	0
J	5	Sample X221	10513	10299	11702					J	5	0.149698	0.134856	0.235258					J	5	0.159117	0.153501	0.254822		0.0253302	0.0119631	0
J	6	Sample X222	9032	9509	10007					J	6	0.0502317	0.0814551	0.114867					J	6	0.151679	0.179745	0.219005		0.00981492	0.00841576	0
J	7	Sample X223	9130	10033	10220					J	7	0.0565857	0.116634	0.129418					J	7	0.0660042	0.135279	0.148982		0.00342576	0.0103722	0
J	8	Sample X224	8170	8387	8503					J	8	-0.00434613	0.00917553	0.016463					J	8	0.097101	0.107466	0.120601		0.00328394	0.00293756	0
J	9	Sample X225	8709	10147	9229					J	9	0.0295078	0.124413	0.0630363					J	9	0.0389262	0.143058	0.0825999		-0.0151145	0.00545921	0
J	10	Sample X226	7601	7667	7755					J	10	-0.0391297	-0.035144	-0.02981					J	10	0.0623175	0.0631461	0.0743284		0.00279557	0.00150137	0
J	11	Sample X227	8462	9682	9123					J	11	0.0138825	0.0929661	0.0561308					J	11	0.0233009	0.111611	0.0756945		-0.00897909	0.00654919	0
J	12	Sample X228	7785	7946	7862					J	12	-0.0279864	-0.0181543	-0.0232937					J	12	0.0734607	0.0801359	0.0808447		0.000177222	0.000923005	0
J	13	Sample X229	8764	9181	9228					J	13	0.0330132	0.0599048	0.062971					J	13	0.0424316	0.0785495	0.0825346		0.00099629	0.00501287	0
J	14	Sample X230	8247	8367	7531					J	14	0.000435432	0.00792327	-0.043343					J	14	0.101883	0.106213	0.0607954		-0.0113545	-0.0051359	0
J	15	Sample X231	9451	9514	9252					J	15	0.0776184	0.0817864	0.0645395					J	15	0.0870368	0.100431	0.0841031		-0.00408198	-0.000366711	0
J	16	Sample X232	7192	7061	7130					J	16	-0.0635485	-0.0712692	-0.0672086					J	16	0.0378986	0.027021	0.0369299		0.00247722	-0.000121096	1
J	17	Sample X233	8790	8479	8670					J	17	0.0346736	0.0149518	0.027028					J	17	0.044092	0.0335965	0.0465916		0.00324876	0.000312443	0
J	18	Sample X234	7574	7510	7484					J	18	-0.0407565	-0.0446043	-0.0461641					J	18	0.0606906	0.0536859	0.0579744		0.00107212	-0.000339529	0
J	19	Sample X235	8590	8825	8725					J	19	0.021956	0.0369122	0.0305266					J	19	0.0313745	0.0555569	0.0500902		-0.00136667	0.00233947	0
J	20	Sample X236	7570	7182	7461					J	20	-0.0409974	-0.0641396	-0.0475422					J	20	0.0604498	0.0341506	0.0565962		0.0056114	-0.000481696	1
J	21	Sample X237	8384	8060	8045					J	21	0.00898762	-0.0111458	-0.0120702					J	21	0.018406	0.00749891	0.00749344		-1.3683e-06	-0.00136408	0
J	22	Sample X238	7256	7168	7035					J	22	-0.059759	-0.0649666	-0.0727958					J	22	0.0416882	0.0333236	0.0313426		-0.000495237	-0.00129319	1
J	23	Sample X239	8088	7938	7923					J	23	-0.00941842	-0.0186447	-0.0195636					J	23	0	0	0		0	0	0
J	24	Sample X240	6541	6596	6494					J	24	-0.101447	-0.0982902	-0.104138					J	24	0	0	0		0	0	1
K	1	Sample X241	33967	35011	36594					K	1	4.32387	4.8332	5.76799					K	1	4.22675	4.70255	5.58604		0.220873	0.169911	0
K	2	Sample X242	30573	32659	34560					K	2	3.0651	3.77713	4.60419					K	2	3.02216	3.73554	4.56766		0.208031	0.193188	0
K	3	Sample X243	29122	31794	35520					K	3	2.65759	3.46102	5.10997					K	3	2.56048	3.33036	4.92802		0.399414	0.295942	0
K	4	Sample X244	28513	32705	37242					K	4	2.50369	3.79488	6.22276					K	4	2.46075	3.75328	6.18624		0.608238	0.465686	0
K	5	Sample X245	26332	27623	33936					K	5	2.02012	2.29449	4.30982					K	5	1.923	2.16383	4.12786		0.491008	0.275607	0
K	6	Sample X246	25434	29956	36737					K	6	1.84694	2.88426	5.86425					K	6	1.804	2.84267	5.82772		0.746262	0.502965	0
K	7	Sample X247	24292	28544	33858					K	7	1.64483	2.51131	4.27472					K	7	1.54772	2.38065	4.09276		0.428028	0.318131	0
K	8	Sample X248	21879	28147	35645					K	8	1.2736	2.41551	5.18115					K	8	1.23065	2.37391	5.14462		0.692677	0.489246	0
K	9	Sample X249	21116	27424	34332					K	9	1.16954	2.25006	4.49374					K	9	1.07242	2.11941	4.31179		0.548095	0.40492	0
K	10	Sample X250	19898	29088	34944					K	10	1.01471	2.64876	4.79826					K	10	0.971768	2.60716	4.76173		0.538642	0.473745	0
K	11	Sample X251	18890	25010	30260					K	11	0.896025	1.76966	2.97188					K	11	0.798909	1.63901	2.78993		0.28773	0.248877	0
K	12	Sample X252	18924	24930	31307					K	12	0.899899	1.75539	3.29658					K	12	0.856956	1.71379	3.26006		0.386566	0.300387	0
K	13	Sample X253	17848	23215	26890					K	13	0.781388	1.47058	2.13479					K	13	0.684272	1.33992	1.95284		0.153229	0.158571	0
K	14	Sample X254	17580	21723	26835					K	14	0.75313	1.25185	2.12323					K	14	0.710187	1.21025	2.0867		0.219112	0.172065	0
K	15	Sample X255	16239	19776	23467					K	15	0.618661	0.999913	1.51004					K	15	0.521545	0.869257	1.32808		0.114707	0.100817	0
K	16	Sample X256	15285	20698	24036					K	16	0.529495	1.11491	1.60205					K	16	0.486552	1.07331	1.56553		0.123053	0.134872	0
K	17	Sample X257	13926	16875	19487					K	17	0.410833	0.68104	0.965342					K	17	0.313717	0.550385	0.78339		0.0582514	0.0587091	0
K	18	Sample X258	12887	16441	18627					K	18	0.326123	0.63821	0.866351					K	18	0.28318	0.596616	0.829823		0.0583016	0.0683304	0
K	19	Sample X259	13116	13983	16020					K	19	0.344373	0.415626	0.597737					K	19	0.247257	0.28497	0.415785		0.0327037	0.021066	0
K	20	Sample X260	11408	13042	14612					K	20	0.213599	0.338451	0.469562					K	20	0.170656	0.296857	0.433034		0.0340444	0.0327973	0
K	21	Sample X261	12076	12056	13999					K	21	0.263308	0.261793	0.416974					K	21	0.166192	0.131138	0.235022		0.0259709	0.00860375	0
K	22	Sample X262	10707	11666	12457					K	22	0.163297	0.232588	0.292471					K	22	0.120353	0.190994	0.255943		0.0162373	0.0169488	0
K	23	Sample X263	9744	10238	10970					K	23	0.0971161	0.130655	0.181952					K	23	0	0	0		0	0	0
K	24	Sample X264	8919	8898	8819					K	24	0.0429437	0.0415937	0.0365282					K	24	0	0	0		0	0	0
L	1	Sample X265	25375	27305	29422					L	1	1.83602	2.22389	2.73692					L	1	1.76243	2.15318	2.65678		0.1259	0.111795	0
L	2	Sample X266	25779	30141	33250					L	2	1.91189	2.93725	4.01298					L	2	1.87792	2.92926	4.00886		0.2699	0.266368	0
L	3	Sample X267	19790	23119	26282					L	3	1.0016	1.45575	2.01012					L	3	0.928009	1.38505	1.92999		0.136235	0.125247	0
L	4	Sample X268	23053	29291	34100					L	4	1.44561	2.70198	4.38481					L	4	1.41164	2.694	4.38069		0.421674	0.371131	0
L	5	Sample X269	17696	18695	23542					L	5	0.765302	0.873974	1.52193					L	5	0.691707	0.803273	1.4418		0.159632	0.0937617	0
L	6	Sample X270	20236	28282	32776					L	6	1.05637	2.44767	3.82246					L	6	1.0224	2.43969	3.81835		0.344666	0.349494	0
L	7	Sample X271	14229	16583	19342					L	7	0.436488	0.652098	0.948251					L	7	0.362893	0.581397	0.86812		0.0716808	0.0631533	0
L	8	Sample X272	19820	25742	31108					L	8	1.00524	1.90484	3.23196					L	8	0.971265	1.89685	3.22784		0.332749	0.282072	0
L	9	Sample X273	12008	14030	14677					L	9	0.258166	0.419589	0.475249					L	9	0.18457	0.348888	0.395118		0.0115575	0.0263184	0
L	10	Sample X274	17286	24685	29766					L	10	0.722678	1.71225	2.8309					L	10	0.688708	1.70426	2.82679		0.280632	0.26726	0
L	11	Sample X275	12246	12325	13344					L	11	0.276246	0.282299	0.362776					L	11	0.20265	0.211598	0.282645		0.0177618	0.00999932	0
L	12	Sample X276	16012	22931	28304					L	12	0.596978	1.42702	2.45295					L	12	0.563007	1.41903	2.44884		0.257452	0.235729	0
L	13	Sample X277	12424	11637	11852					L	13	0.289921	0.23044	0.24644					L	13	0.216326	0.159739	0.166309		0.00164256	-0.00625207	0
L	14	Sample X278	15393	20691	26225					L	14	0.539336	1.11401	1.99877					L	14	0.505365	1.10602	1.99466		0.22216	0.186162	0
L	15	Sample X279	10835	11487	11483					L	15	0.172344	0.219386	0.219092					L	15	0.0987487	0.148685	0.138962		-0.00243081	0.00502661	0
L	16	Sample X280	14163	18660	23497					L	16	0.430862	0.870046	1.51479					L	16	0.396891	0.86206	1.51067		0.162154	0.139223	0
L	17	Sample X281	9663	10084	10580					L	17	0.091697	0.120109	0.154379					L	17	0.0181016	0.0494076	0.0742484		0.0062102	0.00701835	0
L	18	Sample X282	13237	16354	19270					L	18	0.35411	0.629761	0.939826					L	18	0.32014	0.621775	0.935714		0.0784847	0.0769468	0
L	19	Sample X283	12264	10093	10363					L	19	0.277623	0.120723	0.139278					L	19	0.204027	0.0500216	0.059147		0.00228134	-0.0181101	0
L	20	Sample X284	11825	13464	15618					L	20	0.244421	0.372556	0.560042					L	20	0.21045	0.36457	0.55593		0.04784	0.043185	0
L	21	Sample X285	9479	10025	10338					L	21	0.0794692	0.11609	0.137549					L	21	0.00587384	0.045389	0.0574181		0.00300728	0.00644303	0
L	22	Sample X286	9977	11083	12245					L	22	0.11283	0.190047	0.276169					L	22	0.0788588	0.182061	0.272058		0.0224992	0.0241499	0
L	23	Sample X287	9390	9346	9489					L	23	0.0735954	0.0707012	0.0801308					L	23	0	0	0		0	0	0
L	24	Sample X288	8779	8368	8306					L	24	0.0339709	0.00798585	0.00411144					L	24	0	0	0		0	0	0
M	1	Sample X289	29570	31187	33371					M	1	2.77695	3.25744	4.06345					M	1	2.70795	3.17559	3.9621		0.196629	0.156769	0
M	2	Sample X290	30792	34484	36845					M	2	3.13222	4.56699	5.93843					M	2	3.08567	4.55084	5.92348		0.34316	0.354726	0
M	3	Sample X291	24962	28925	32449					M	3	1.76109	2.60679	3.69736					M	3	1.69209	2.52494	3.59602		0.267769	0.237991	0
M	4	Sample X292	27818	33786	38172					M	4	2.33883	4.24263	6.96986					M	4	2.29228	4.22649	6.95491		0.682107	0.58283	0
M	5	Sample X293	22897	26574	33566					M	5	1.42187	2.06915	4.14645					M	5	1.35287	1.9873	4.0451		0.514451	0.336529	0
M	6	Sample X294	25029	31038	37476					M	6	1.77307	3.20956	6.39947					M	6	1.72652	3.19341	6.38452		0.797776	0.58225	0
M	7	Sample X295	19964	24251	30620					M	7	1.02277	1.63792	3.07937					M	7	0.953776	1.55607	2.97803		0.355489	0.253031	0
M	8	Sample X296	20582	28225	34193					M	8	1.10003	2.43404	4.42807					M	8	1.05348	2.41789	4.41311		0.498806	0.419954	0
M	9	Sample X297	17980	25272	30190					M	9	0.795486	1.81709	2.95146					M	9	0.726492	1.73524	2.85011		0.278718	0.265452	0
M	10	Sample X298	16787	23361	28400					M	10	0.672263	1.49334	2.47613					M	10	0.625712	1.4772	2.46118		0.245996	0.229433	0
M	11	Sample X299	16051	23454	27939					M	11	0.600682	1.50798	2.36675					M	11	0.531688	1.42613	2.2654		0.209818	0.216714	0
M	12	Sample X300	14134	18358	21954					M	12	0.428397	0.836525	1.28414					M	12	0.381847	0.820377	1.26919		0.112203	0.110918	0
M	13	Sample X301	14896	19933	24035					M	13	0.494566	1.01898	1.60189					M	13	0.425572	0.937128	1.50054		0.140854	0.134371	0
M	14	Sample X302	11912	14326	16843					M	14	0.250938	0.444796	0.677843					M	14	0.204388	0.428648	0.662891		0.0585608	0.0573129	0
M	15	Sample X303	13612	17611	21159					M	15	0.38471	0.756374	1.17525					M	15	0.315716	0.674522	1.07391		0.0998464	0.094774	0
M	16	Sample X304	11440	12207	13941					M	16	0.21594	0.273267	0.412093					M	16	0.16939	0.257119	0.397141		0.0350055	0.0284689	0
M	17	Sample X305	11583	14804	17351					M	17	0.226451	0.486421	0.729362					M	17	0.157457	0.404568	0.628016		0.0558619	0.0588199	0
M	18	Sample X306	11595	11730	12488					M	18	0.227336	0.237339	0.294871					M	18	0.180786	0.221191	0.279919		0.0146821	0.0123916	0
M	19	Sample X307	11164	12614	14306					M	19	0.195879	0.304666	0.443079					M	19	0.126885	0.222814	0.341733		0.0297298	0.0268559	0
M	20	Sample X308	9554	9356	10636					M	20	0.0844396	0.0713584	0.158304					M	20	0.0378893	0.0552103	0.143352		0.0220355	0.0131829	0
M	21	Sample X309	10560	11161	12387					M	21	0.15298	0.195663	0.287068					M	21	0.0839863	0.11381	0.185721		0.0179778	0.0127169	0
M	22	Sample X310	9327	9204	9488					M	22	0.0694534	0.0614044	0.0800647					M	22	0.0229031	0.0452563	0.0651128		0.00496413	0.00527622	0
M	23	Sample X311	9320	9515	9807					M	23	0.068994	0.0818526	0.101346					M	23	0	0	0		0	0	0
M	24	Sample X312	8975	8498	8479					M	24	0.0465503	0.016148	0.0149518					M	24	0	0	0		0	0	0
N	1	Sample X313	27706	29638	30724					N	1	2.31326	2.79554	3.11121					N	1	2.25914	2.73668	3.04084		0.0760394	0.0977117	0
N	2	Sample X314	33033	36597	38403					N	2	3.92436	5.76999	7.17561					N	2	3.88463	5.75063	7.16944		0.354704	0.410601	0
N	3	Sample X315	23614	25489	28074					N	3	1.53342	1.85717	2.39828					N	3	1.4793	1.79831	2.32791		0.132401	0.106077	0
N	4	Sample X316	29362	35657	37875					N	4	2.72086	5.18805	6.7178					N	4	2.68113	5.16868	6.71162		0.385735	0.503812	0
N	5	Sample X317	18363	20367	22509					N	5	0.837075	1.07277	1.36402					N	5	0.782956	1.01391	1.29364		0.0699327	0.0638358	0
N	6	Sample X318	24869	33261	35325					N	6	1.74456	4.01753	5.00152					N	6	1.70483	3.99817	4.99535		0.249295	0.411314	0
N	7	Sample X319	15592	17340	18754					N	7	0.557635	0.728229	0.880616					N	7	0.503517	0.669367	0.810243		0.0352191	0.0383408	0
N	8	Sample X320	19391	26699	30631					N	8	0.954008	2.0949	3.08272					N	8	0.914276	2.07553	3.07655		0.250255	0.270284	0
N	9	Sample X321	13246	14469	15056					N	9	0.354837	0.457128	0.508836					N	9	0.300719	0.398265	0.438463		0.0100495	0.017218	0
N	10	Sample X322	14981	21127	25143					N	10	0.50213	1.171	1.79361					N	10	0.462398	1.15164	1.78744		0.15895	0.16563	0
N	11	Sample X323	11428	12220	12591					N	11	0.215062	0.274259	0.302873					N	11	0.160944	0.215397	0.232501		0.00427593	0.00894458	0
N	12	Sample X324	12770	16184	19609					N	12	0.316888	0.61338	0.979853					N	12	0.277156	0.594016	0.973681		0.0949163	0.0870657	0
N	13	Sample X325	10874	11548	11853					N	13	0.175113	0.223871	0.246515					N	13	0.120995	0.165008	0.176142		0.00278356	0.00689349	0
N	14	Sample X326	11103	13035	15390					N	14	0.191485	0.337892	0.539062					N	14	0.151753	0.318527	0.53289		0.0535907	0.0476421	0
N	15	Sample X327	10111	10207	10524					N	15	0.121952	0.128526	0.150466					N	15	0.0678336	0.0696631	0.0800931		0.0026075	0.00153245	0
N	16	Sample X328	10259	11168	12656					N	16	0.1321	0.196168	0.307946					N	16	0.0923682	0.176804	0.301774		0.0312427	0.0261758	0
N	17	Sample X329	9889	9795	10015					N	17	0.106873	0.10054	0.11541					N	17	0.0527548	0.0416771	0.0450375		0.000840117	-0.000964655	0
N	18	Sample X330	9219	9778	10484					N	18	0.0623833	0.0993975	0.147677					N	18	0.0226514	0.080033	0.141505		0.0153681	0.0148567	0
N	19	Sample X331	10131	9657	10018					N	19	0.123319	0.0912965	0.115614					N	19	0.0692005	0.0324339	0.0452415		0.0032019	-0.00299487	0
N	20	Sample X332	9261	9199	9474					N	20	0.0651282	0.0610782	0.0791385					N	20	0.0253963	0.0417138	0.0729664		0.00781315	0.00594626	0
N	21	Sample X333	9198	9052	9459					N	21	0.061013	0.0515259	0.0781469					N	21	0.00689475	-0.00733665	0.00777426		0.00377773	0.000109938	0
N	22	Sample X334	8845	8783	8958					N	22	0.0381931	0.0342264	0.0454544					N	22	-0.0015388	0.0148619	0.0392822		0.00610507	0.00510263	0
N	23	Sample X335	9092	9165	9341					N	23	0.0541182	0.0588626	0.0703727					N	23	0	0	0		0	0	0
N	24	Sample X336	8869	8549	8339					N	24	0.0397319	0.0193644	0.00617216					N	24	0	0	0		0	0	0
O	1	Sample X337	45458	43618	42172	43749.3	41508.7	24		O	1	26.0999	16.4519	12.4764					O	1	26.0895	16.4334	12.4462		-0.996804	-1.70542	1
O	2	Sample X338	42742	41436	40348					O	2	13.8269	11.0306	9.33971					O	2	13.8057	11.0237	9.34851		-0.41879	-0.557145	1
O	3	Sample X339	40276	39457	38622	39451.7	38298	12		O	3	9.24255	8.23976	7.37907					O	3	9.23219	8.22128	7.34879		-0.21812	-0.235424	0
O	4	Sample X340	40050	37649	37195					O	4	8.94766	6.53476	6.18811					O	4	8.9264	6.52784	6.19691		-0.0827318	-0.341186	0
O	5	Sample X341	38519	36223	35496	36746	34172.3	6		O	5	7.28233	5.52826	5.09645					O	5	7.27196	5.50978	5.06618		-0.110899	-0.275722	0
O	6	Sample X342	35613	33688	33216					O	6	5.1628	4.19945	3.99893					O	6	5.14154	4.19253	4.00773		-0.0461987	-0.141726	0
O	7	Sample X343	30587	29702	29572	29953.7	28540.7	3		O	7	3.06934	2.81316	2.77749					O	7	3.05898	2.79468	2.74722		-0.0118661	-0.0389699	0
O	8	Sample X344	29630	27809	28183					O	8	2.79335	2.33676	2.42404					O	8	2.77209	2.32984	2.43284		0.025751	-0.0424054	0
O	9	Sample X345	24035	23160	22868	23354.3	21719	1.5		O	9	1.60189	1.46207	1.41749					O	9	1.59152	1.44359	1.38721		-0.0140935	-0.0255386	0
O	10	Sample X346	22399	21330	21428					O	10	1.34792	1.19815	1.2114					O	10	1.32666	1.19123	1.2202		0.00724286	-0.0133079	0
O	11	Sample X347	17611	17413	17350	17458	16713.7	0.75		O	11	0.756374	0.735763	0.729259					O	11	0.746008	0.717283	0.698988		-0.00457379	-0.00587754	0
O	12	Sample X348	17445	16510	16186					O	12	0.739077	0.644943	0.613572					O	12	0.717817	0.638021	0.622373		-0.00391196	-0.0119305	0
O	13	Sample X349	13999	13741	13574	13771.3	12792.3	0.375		O	13	0.416974	0.395386	0.381579					O	13	0.406608	0.376905	0.351308		-0.00639937	-0.00691249	0
O	14	Sample X350	13151	12766	12460					O	14	0.347183	0.316573	0.292703					O	14	0.325923	0.309651	0.301504		-0.00203663	-0.00305231	0
O	15	Sample X351	11353	11272	11281	11302	10850.7	0.1875		O	15	0.209585	0.203694	0.204348					O	15	0.199219	0.185214	0.174076		-0.00278446	-0.00314287	0
O	16	Sample X352	11215	10802	10535					O	16	0.199564	0.170006	0.151234					O	16	0.178304	0.163083	0.160035		-0.000762212	-0.00228368	0
O	17	Sample X353	10023	9895	10004	9974	8974.33	0.09375		O	17	0.115954	0.107278	0.114663					O	17	0.105588	0.0887976	0.0843909		-0.00110167	-0.00264961	0
O	18	Sample X354	9171	8962	8790					O	18	0.0592533	0.0457121	0.0346736					O	18	0.0379931	0.0387898	0.0434746		0.00117119	0.000685183	0
O	19	Sample X355	9372	9425	9488	9428.33	8611.67	0.046875		O	19	0.0724106	0.0759022	0.0800647					O	19	0.0620443	0.0574215	0.0497928		-0.00190715	-0.00153143	0
O	20	Sample X356	8813	8521	8501					O	20	0.0361442	0.0175976	0.016337					O	20	0.014884	0.0106752	0.025138		0.00361568	0.00128174	0
O	21	Sample X357	8627	8705	8930	8754	8122	0.0234375		O	21	0.0242993	0.0292533	0.0436513					O	21	0.013933	0.0107726	0.0133795		0.000651737	-6.91857e-05	0
O	22	Sample X358	8424	8015	7927					O	22	0.0114955	-0.013917	-0.0193186					O	22	-0.00976474	-0.0208393	-0.0105177		0.0025804	-9.41202e-05	0
O	23	Sample X359	8406	8535	8721	8554	8342.67	0		O	23	0.0103663	0.0184807	0.0302718					O	23	0	0	0		0	0	0
O	24	Sample X360	8579	8351	8098					O	24	0.0212602	0.00692234	-0.00880094					O	24	0	0	0		0	0	0
									0			#DIV/0!	#DIV/0!
									0			#DIV/0!	#DIV/0!
									0			#DIV/0!	#DIV/0!
									0			#DIV/0!	#DIV/0!
									0			#DIV/0!	#DIV/0!
									0			#DIV/0!	#DIV/0!
									0			#DIV/0!	#DIV/0!
									0			#DIV/0!	#DIV/0!
[truncated: 12 more columns]
