# Supplementary material for: PDZ-directed substrate recruitment is the primary determinant of specific 4E-BP1 dephosphorylation by PP1-Neurabin
Source: eLife journal article supplement (doi:10.7554/elife.103403), 2024-11-20
Supplement: fig5-data1 [file replicate1.xlsx]

## Sheet: All Cycles
Well Row	Well Col	Content	Raw Data (425-10/460-20)	Raw Data (425-10/460-20)	Raw Data (425-10/460-20)	Raw Data (425-10/460-20)	Raw Data (425-10/460-20)		convert to phosphate	Well Row	Well Col	Raw Data (425-10/460-20)	Raw Data (425-10/460-20)	Raw Data (425-10/460-20)	Raw Data (425-10/460-20)	Raw Data (425-10/460-20)		normalize to the lasst column	Well Row	Well Col	Raw Data (425-10/460-20)	Raw Data (425-10/460-20)	Raw Data (425-10/460-20)	Raw Data (425-10/460-20)	Raw Data (425-10/460-20)						PP1-Neb 1 nM																PP1-Ph1 2.5 nM
		Time [min]	0	4	8	12	16					0	4	8	12	16					0	4	8	12	16						V1	V2	V3	V4	V5	V6	V7	P1	P2	P3	P4	P5	P6	P7	P8		V1	V2	V3
A	1	Sample X1	30240	38647	42841	45688	47373			A	1	1.01164	1.85511	2.49537	3.07358	3.49481			A	1	0.929458	1.78249	2.41581	3.0029	3.42504	0.213258	0	0.155974		400	0.213258	0.0342112	0.0236386	0.0319846	0.0447407	0.159105	0.0795772	0.055139	0.0215393	0.0256089	0.0247784	0.0462847	0.0566103	0.0102612	0.0119446		0.347869	0.0555471	0.0687263
A	2	Sample X2	33865	43863	45425	46610	47552			A	2	1.32285	2.68656	3.01377	3.29544	3.54385			A	2	1.32137	2.71284	3.04708	3.32329	3.57073	0.347869	0	0.140585		200	0.261596	0.0339574	0.0261571	0.0272783	0.0430854	0.195353	0.107309	0.0410639	-0.00521378	0.130573	0.0341868	0.086373	0.0269438	0.0128247	0.0169439		0.381909	0.0348244	0.051953
A	3	Sample X3	31197	40577	45448	48148	49316			A	3	1.08768	2.1245	3.01894	3.71384	4.0802			A	3	1.00549	2.05188	2.93938	3.64316	4.01042	0.261596	0	0.187808		100	0.192877	0.0351375	0.0229332	0.0268265	0.0364298	0.153597	0.073861	0.0395106	0.00471717	0.0546049	0.0299146	0.0947475	0.00470675	0.0126893	0.0076684		0.239196	0.032069	0.0461018
A	4	Sample X4	34983	45059	47097	49075	48519			A	4	1.43305	2.93292	3.42093	4.0007	3.82519			A	4	1.43157	2.9592	3.45424	4.02854	3.85207	0.381909	0	0.151281		50	0.236411	0.0352363	0.023736	0.0249894	0.0385815	0.148026	0.100448	0.0348641	0.00606194	0.108488	0.0113755	0.0851411	0.0163967	0.0096577	0.00846473		0.221809	0.0229323	0.0317911
A	5	Sample X5	26906	35971	40284	40971	41352			A	5	0.775096	1.53704	2.0811	2.1844	2.24408			A	5	0.692913	1.46442	2.00154	2.11373	2.1743	0.192877	0	0.092587		25	0.165204	0.0338481	0.0223523	0.0242424	0.0343498	0.136294	0.0867677	0.0283022	-0.000207842	0.0865069	0.0111549	0.0585461	0.0151728	0.00867382	0.00605284		0.145571	0.0172209	0.0211661
A	6	Sample X6	27957	38012	40662	39107	38481			A	6	0.845303	1.77432	2.13727	1.91593	1.83364			A	6	0.843824	1.80061	2.17058	1.94378	1.86052	0.239196	0	0.0635436		12.5	0.163229	0.0251377	0.019077	0.0256725	0.031866	0.127229	0.0999233	0.0286601	0.0037231	0.0759916	0.0101498	0.0556992	0.0085495	0.00471479	0.00313856		0.075793	0.0137938	0.0190668
A	7	Sample X7	28194	38199	42783	45387	46349			A	7	0.86166	1.79774	2.485	3.00524	3.23063			A	7	0.779477	1.72512	2.40544	2.93457	3.16085	0.236411	0	0.148836		6.25	0.117292	0.0210057	0.0154806	0.0205443	0.0255304	0.112839	0.0634573	0.0219684	-0.00294693	0.0456334	0.00494129	0.0398831	0.00220152	0.00440371	0.0042464		0.040924	0.0101787	0.0158033
A	8	Sample X8	23751	35093	37166	36195	40256			A	8	0.584836	1.44431	1.67203	1.56155	2.077			A	8	0.583357	1.47059	1.70534	1.58939	2.10388	0.221809	0	0.0950325		3.125	0.0905733	0.0131055	0.0117271	0.016693	0.0188805	0.0868648	0.0464863	0.0141775	-0.0054279	0.0350226	0.0053248	0.0283065	0.00745403	0.00407214	0.00642908		0.0312916	0.00987999	0.0195806
A	9	Sample X9	22450	32126	35673	35400	37636			A	9	0.514227	1.16548	1.50498	1.47615	1.72813			A	9	0.432045	1.09286	1.42543	1.40547	1.65835	0.165204	0	0.0766442		1.5625	0.0879935	0.00580292	0.00762895	0.0163773	0.0137289	0.0533228	0.0280452	0.0109375	-0.00478825	0.0278913	0.00461655	0.0265452	0.00316041	0.000827879	-0.000136854		0.0265104	0.0089436	0.0109384
A	10	Sample X10	18945	28704	30535	32541	35361			A	10	0.343027	0.897546	1.03465	1.20159	1.47207			A	10	0.341548	0.923832	1.06797	1.22944	1.49895	0.145571	0	0.0723373		0.78125	0.0299348	0.00442927	0.00551678	0.0158115	0.0119395	0.0405054	0.0128066	0.00841715	-0.0010472	0.0139449	0.00887161	0.0141166	0.00416902	0.00252888	0.00172791		0.00987289	0.0118564	0.0124284
A	11	Sample X11	21429	31408	35828	37238	37840			A	11	0.461639	1.10499	1.52158	1.68051	1.75304			A	11	0.379456	1.03237	1.44202	1.60983	1.68327	0.163229	0	0.0814881		0.390625	0.0154042	0.00215588	0.00780558	0.015494	0.00521415	0.0294877	0.00594533	0.00670901	-0.000784218	0.00765963	0.00818284	0.00846429	-0.00270075	-0.00159946	0.00111882		0.00565665	0.00863499	0.00535007
A	12	Sample X12	16221	22211	22632	26281	28241			A	12	0.226296	0.501702	0.523856	0.735064	0.864928			A	12	0.224817	0.527989	0.557169	0.762909	0.891807	0.075793	0	0.0416869		0	0	0	0	0	0	0	0	0	0	0	0	0	0	0	0		0	0	0
A	13	Sample X13	19595	27769	29310	32003	34023			A	13	0.372864	0.832468	0.941449	1.15494	1.33797			A	13	0.290681	0.759848	0.861893	1.08426	1.26819	0.117292	0	0.0610943
A	14	Sample X14	15134	18410	18702	22131	23257			A	14	0.183137	0.319068	0.332079	0.49754	0.557531			A	14	0.181658	0.345354	0.365392	0.525385	0.58441	0.040924	0	0.025172			3	27	51	75	99	123	147	171	195	219	243	267	291	315	339		3	27	51
A	15	Sample X15	18477	25302	29688	29384	31462			A	15	0.32204	0.67477	0.969556	0.946907	1.10946			A	15	0.239857	0.60215	0.890001	0.87623	1.03968	0.0905733	0	0.0499889			PP1-Neb 1 nM																PP1-Ph1 2.5 nM
A	16	Sample X16	11480	14210	14745	16976	17916			A	16	0.0504471	0.147848	0.168129	0.257376	0.297409			A	16	0.0489679	0.174134	0.201442	0.285222	0.324288	0.0312916	0	0.0172075			V1	V2	V3	V4	V5	V6	V7	P1	P2	P3	P4	P5	P6	P7	P8		V1	V2	V3
A	17	Sample X17	18218	24937	26052	30918	31532			A	17	0.310598	0.653009	0.720702	1.06509	1.11526			A	17	0.228415	0.580389	0.641146	0.994416	1.04549	0.0879935	0	0.051067	0	400	0.213258	0.0342112	0.0236386	0.0319846	0.0447407	0.159105	0.0795772	0.055139	0.0215393	0.0256089	0.0247784	0.0462847	0.0566103	0.0102612	0.0119446		0.347869	0.0555471	0.0687263
A	18	Sample X18	10445	12742	12654	14724	15591			A	18	0.0159786	0.0942547	0.091134	0.167325	0.20106			A	18	0.0144994	0.120541	0.124447	0.19517	0.227939	0.0265104	0	0.01334	2	200	0.261596	0.0339574	0.0261571	0.0272783	0.0430854	0.195353	0.107309	0.0410639	-0.00521378	0.130573	0.0341868	0.086373	0.0269438	0.0128247	0.0169439		0.381909	0.0348244	0.051953
A	19	Sample X19	14420	17180	20043	20882	21983			A	19	0.15576	0.265936	0.393909	0.434422	0.489878			A	19	0.0735768	0.193316	0.314354	0.363745	0.420101	0.0299348	0	0.0216578	4	100	0.192877	0.0351375	0.0229332	0.0268265	0.0364298	0.153597	0.073861	0.0395106	0.00471717	0.0546049	0.0299146	0.0947475	0.00470675	0.0126893	0.0076684		0.239196	0.032069	0.0461018
A	20	Sample X20	10160	10520	10617	12075	12597			A	20	0.00670767	0.0184339	0.021619	0.0708504	0.089118			A	20	0.00522846	0.04472	0.0549325	0.098696	0.115997	0.00987289	0	0.00692304	6	50	0.236411	0.0352363	0.023736	0.0249894	0.0385815	0.148026	0.100448	0.0348641	0.00606194	0.108488	0.0113755	0.0851411	0.0163967	0.0096577	0.00846473		0.221809	0.0229323	0.0317911
A	21	Sample X21	13205	14608	15978	17049	18438			A	21	0.110842	0.162896	0.216488	0.260431	0.320309			A	21	0.0286592	0.0902762	0.136932	0.189754	0.250532	0.0154042	0	0.0138671	8	25	0.165204	0.0338481	0.0223523	0.0242424	0.0343498	0.136294	0.0867677	0.0283022	-0.000207842	0.0865069	0.0111549	0.0585461	0.0151728	0.00867382	0.00605284		0.145571	0.0172209	0.0211661
A	22	Sample X22	10020	9860	10521	11105	11449			A	22	0.0021875	-0.00295128	0.0184666	0.0378111	0.0493961			A	22	0.000708293	0.0233349	0.0517801	0.0656567	0.0762751	0.00565665	0	0.00472293	10	12.5	0.163229	0.0251377	0.019077	0.0256725	0.031866	0.127229	0.0999233	0.0286601	0.0037231	0.0759916	0.0101498	0.0556992	0.0085495	0.00471479	0.00313856		0.075793	0.0137938	0.0190668
A	23	Sample X23	12400	12126	12325	12070	12044			A	23	0.0821829	0.0726199	0.0795557	0.0706771	0.0697765			A	23	0	0	0	0	0	0	0	0	12	6.25	0.117292	0.0210057	0.0154806	0.0205443	0.0255304	0.112839	0.0634573	0.0219684	-0.00294693	0.0456334	0.00494129	0.0398831	0.00220152	0.00440371	0.0042464		0.040924	0.0101787	0.0158033
A	24	Sample X24	9998	9122	8896	9072	9103			A	24	0.00147921	-0.0262862	-0.0333135	-0.0278456	-0.0268791			A	24	0	0	0	0	0	0	0	0	14	3.125	0.0905733	0.0131055	0.0117271	0.016693	0.0188805	0.0868648	0.0464863	0.0141775	-0.0054279	0.0350226	0.0053248	0.0283065	0.00745403	0.00407214	0.00642908		0.0312916	0.00987999	0.0195806
B	1	Sample X25	15760	18624	20900	22782	23972			B	1	0.207769	0.328588	0.435308	0.531851	0.597254			B	1	0.173932	0.310777	0.436175	0.52976	0.586752	0.0342112	0	0.0258012	16	1.5625	0.0879935	0.00580292	0.00762895	0.0163773	0.0137289	0.0533228	0.0280452	0.0109375	-0.00478825	0.0278913	0.00461655	0.0265452	0.00316041	0.000827879	-0.000136854		0.0265104	0.0089436	0.0109384
B	2	Sample X26	18599	22472	24778	27008	29462			B	2	0.327472	0.515387	0.643647	0.781748	0.952683			B	2	0.286912	0.5091	0.641395	0.780107	0.954064	0.0555471	0	0.041697	18	0.78125	0.0299348	0.00442927	0.00551678	0.0158115	0.0119395	0.0405054	0.0128066	0.00841715	-0.0010472	0.0139449	0.00887161	0.0141166	0.00416902	0.00252888	0.00172791		0.00987289	0.0118564	0.0124284
B	3	Sample X27	16275	19061	21410	23257	25023			B	3	0.228488	0.348293	0.460682	0.557531	0.658102			B	3	0.194652	0.330481	0.46155	0.55544	0.6476	0.0339574	0	0.0283093	20	0.390625	0.0154042	0.00215588	0.00780558	0.015494	0.00521415	0.0294877	0.00594533	0.00670901	-0.000784218	0.00765963	0.00818284	0.00846429	-0.00270075	-0.00159946	0.00111882		0.00565665	0.00863499	0.00535007
B	4	Sample X28	14907	17497	19223	20743	22042			B	4	0.174352	0.279377	0.355689	0.427609	0.492926			B	4	0.133792	0.27309	0.353437	0.425969	0.494307	0.0348244	0	0.0225321	22	0	0	0	0	0	0	0	0	0	0	0	0	0	0	0	0		0	0	0
B	5	Sample X29	14914	17956	20195	21704	23117			B	5	0.174622	0.299146	0.401141	0.47557	0.549904			B	5	0.140785	0.281335	0.402008	0.473479	0.539402	0.0351375	0	0.0249135
B	6	Sample X30	14626	16981	18528	19547	19802			B	6	0.163582	0.257585	0.324307	0.370633	0.382538			B	6	0.123022	0.251298	0.322055	0.368993	0.383919	0.032069	0	0.016306
B	7	Sample X31	15303	18310	20300	22152	23224			B	7	0.189728	0.314648	0.406165	0.498631	0.555729			B	7	0.155892	0.296837	0.407032	0.49654	0.545226	0.0352363	0	0.0243334
B	8	Sample X32	12720	14292	15436	15315	17144			B	8	0.0934735	0.15093	0.194946	0.190198	0.26442			B	8	0.0529139	0.144643	0.192694	0.188558	0.265801	0.0229323	0	0.0133054
B	9	Sample X33	12968	16107	18053	18815	20252			B	9	0.102316	0.221683	0.303372	0.337156	0.403865			B	9	0.0684792	0.203872	0.304239	0.335065	0.393363	0.0338481	0	0.0203052
B	10	Sample X34	11364	12370	12824	13133	14364			B	10	0.0465202	0.0811311	0.0971717	0.108244	0.153644			B	10	0.00596053	0.0748441	0.0949198	0.106604	0.155024	0.0172209	0	0.00931649
B	11	Sample X35	13435	15658	16674	18060	19216			B	11	0.119189	0.203714	0.244832	0.303677	0.355368			B	11	0.0853521	0.185903	0.245699	0.301586	0.344866	0.0251377	0	0.0162196
B	12	Sample X36	11407	12018	12690	12086	13211			B	12	0.0479739	0.0688767	0.0924094	0.0712318	0.111059			B	12	0.0074143	0.0625897	0.0901575	0.0695916	0.112439	0.0137938	0	0.00656407
B	13	Sample X37	12416	14287	14650	15875	16416			B	13	0.0827442	0.150742	0.164497	0.212359	0.234234			B	13	0.0489077	0.132931	0.165364	0.210268	0.223732	0.0210057	0	0.0109265
B	14	Sample X38	11224	11415	11445	11887	12168			B	14	0.0418025	0.0482447	0.0492605	0.0643561	0.0740795			B	14	0.00124286	0.0419576	0.0470086	0.0627159	0.0754601	0.0101787	0	0.00463858
B	15	Sample X39	12679	13687	13607	15244	15285			B	15	0.0920195	0.128416	0.125477	0.187422	0.189024			B	15	0.0581829	0.110605	0.126345	0.185332	0.178522	0.0131055	0	0.00752119
B	16	Sample X40	11345	11500	11103	11651	11577			B	16	0.0458785	0.0511258	0.0377441	0.056266	0.0537435			B	16	0.00531888	0.0448388	0.0354922	0.0546259	0.0551241	0.00987999	0	0.00311282
B	17	Sample X41	10699	10916	10982	11591	11722			B	17	0.0243202	0.0315065	0.0337033	0.0542202	0.0586926			B	17	-0.00951639	0.0136953	0.0345704	0.0521293	0.0481903	0.00580292	0	0.00360667
B	18	Sample X42	11001	11046	9977	10827	10606			B	18	0.0343366	0.0358384	0.000803623	0.0285524	0.0212573			B	18	-0.00622301	0.0295514	-0.0014483	0.0269123	0.0226378	0.0089436	0	0.0018038
B	19	Sample X43	11941	11990	11307	12059	12146			B	19	0.0662169	0.0679086	0.0445965	0.070296	0.0733147			B	19	0.0323803	0.0500974	0.0454637	0.0682051	0.0628123	0.00442927	0	0.001902
B	20	Sample X44	11627	12010	10956	11350	11359			B	20	0.0554471	0.0686	0.0328373	0.0460473	0.0463513			B	20	0.0148875	0.062313	0.0305853	0.0444072	0.0477319	0.0118564	0	0.00205277
B	21	Sample X45	9743	9510	9481	9793	10580			B	21	-0.00669083	-0.0140926	-0.0150097	-0.0050946	0.0204028			B	21	-0.0405274	-0.0319039	-0.0141426	-0.00718549	0.00990041	0.00215588	0	0.00315174
B	22	Sample X46	11055	11063	11044	11050	11004			B	22	0.036139	0.0364064	0.0357716	0.035972	0.0344367			B	22	-0.00442059	0.0301194	0.0335197	0.0343319	0.0358173	0.00863499	0	0.00251487
B	23	Sample X47	10986	10501	9925	10017	10277			B	23	0.0338366	0.0178112	-0.000867122	0.00209089	0.0105024			B	23	0	0	0	0	0	0	0	0
B	24	Sample X48	11187	10147	10022	10003	9909			B	24	0.0405596	0.006287	0.00225192	0.00164014	-0.00138059			B	24	0	0	0	0	0	0	0	0
C	1	Sample X49	16288	18056	19527	20622	21355			C	1	0.229017	0.303503	0.369704	0.421711	0.457919			C	1	0.223958	0.318512	0.395179	0.440065	0.4758	0.0236386	0	0.0157401
C	2	Sample X50	18804	23614	25643	27142	28300			C	2	0.336661	0.577201	0.695447	0.790538	0.869041			C	2	0.27725	0.552155	0.659542	0.756935	0.837135	0.0687263	0	0.0349929
C	3	Sample X51	13816	16009	17554	18127	18356			C	3	0.133174	0.217734	0.281812	0.306606	0.316679			C	3	0.128115	0.232744	0.307286	0.32496	0.33456	0.0261571	0	0.0129028
C	4	Sample X52	17533	21284	23435	25278	26662			C	4	0.280914	0.454361	0.567298	0.673327	0.75932			C	4	0.221502	0.429315	0.531393	0.639724	0.727414	0.051953	0	0.0316195
C	5	Sample X53	13604	15489	16923	17881	18269			C	5	0.125367	0.197032	0.255164	0.295891	0.312841			C	5	0.120309	0.212042	0.280638	0.314245	0.330723	0.0229332	0	0.0131508
C	6	Sample X54	15815	19317	21143	21946	21086			C	6	0.209961	0.360003	0.447328	0.48797	0.444497			C	6	0.15055	0.334957	0.411422	0.454367	0.412591	0.0461018	0	0.0163776
C	7	Sample X55	12269	14333	15785	15880	16951			C	7	0.0775988	0.152474	0.208765	0.212559	0.256332			C	7	0.0725404	0.167484	0.234239	0.230913	0.274214	0.023736	0	0.0126046
C	8	Sample X56	14513	16849	18398	18766	18734			C	8	0.159283	0.252083	0.318537	0.334952	0.333514			C	8	0.099872	0.227036	0.282631	0.301348	0.301609	0.0317911	0	0.0126086
C	9	Sample X57	13842	15652	16963	16996	18090			C	9	0.134135	0.203476	0.256833	0.258212	0.304988			C	9	0.129077	0.218486	0.282307	0.276566	0.322869	0.0223523	0	0.012112
C	10	Sample X58	13223	14579	15828	15429	16677			C	10	0.111493	0.161792	0.21048	0.19467	0.244956			C	10	0.0520812	0.136746	0.174575	0.161067	0.213051	0.0211661	0	0.0100606
C	11	Sample X59	12482	14035	14749	15731	16407			C	11	0.0850635	0.141303	0.168282	0.206614	0.233867			C	11	0.080005	0.156313	0.193756	0.224968	0.251748	0.019077	0	0.0107339
C	12	Sample X60	12353	13524	14395	14226	15500			C	12	0.0805357	0.122438	0.154815	0.148449	0.197466			C	12	0.0211241	0.0973914	0.118909	0.114846	0.16556	0.0190668	0	0.00902725
C	13	Sample X61	11642	12842	13218	13559	14197			C	13	0.0559588	0.0978133	0.111312	0.123718	0.147361			C	13	0.0509004	0.112823	0.136786	0.142072	0.165242	0.0154806	0	0.00714635
C	14	Sample X62	11867	12693	13271	12692	13810			C	14	0.0636678	0.0925158	0.11323	0.0924803	0.132952			C	14	0.00425624	0.0674695	0.0773247	0.058877	0.101046	0.0158033	0	0.00604939
C	15	Sample X63	11161	11950	12309	12482	12777			C	15	0.0396873	0.0665274	0.0789962	0.0850635	0.0954987			C	15	0.0346288	0.0815371	0.10447	0.103417	0.11338	0.0117271	0	0.00492195
C	16	Sample X64	11197	12476	11758	11548	12165			C	16	0.0408954	0.0848524	0.0599254	0.0527568	0.0739752			C	16	-0.0185161	0.0598062	0.0240202	0.0191535	0.0420696	0.0195806	0	0.00378661
C	17	Sample X65	11505	11811	11451	12012	12259			C	17	0.0512956	0.0617432	0.0494638	0.0686692	0.0772498			C	17	0.0462371	0.0767529	0.074938	0.087023	0.0951312	0.00762895	0	0.00305588
C	18	Sample X66	12538	12803	11630	12496	12449			C	18	0.0870357	0.0964238	0.0555495	0.0855561	0.0839032			C	18	0.0276242	0.0713776	0.0196443	0.0519528	0.0519976	0.0109384	0	0.00152334
C	19	Sample X67	10946	11006	10766	11179	11259			C	19	0.0325044	0.0345034	0.0265331	0.0402911	0.0429797			C	19	0.0274459	0.0495131	0.0520073	0.058645	0.0608611	0.00551678	0	0.00208845
C	20	Sample X68	9573	10053	9615	9762	9848			C	20	-0.0120972	0.00325097	-0.0107645	-0.00608459	-0.00333553			C	20	-0.0715088	-0.0217953	-0.0466697	-0.0396879	-0.0352411	0.0124284	0	0.00226673
C	21	Sample X69	9956	10301	10091	9924	10356			C	21	0.000128532	0.0112827	0.0044771	-0.000899222	0.0130734			C	21	-0.00492993	0.0262924	0.0299513	0.0174546	0.0309548	0.00780558	0	0.0022428
C	22	Sample X70	11396	11010	10959	11004	11058			C	22	0.0476018	0.0346368	0.0329372	0.0344367	0.0362393			C	22	-0.0118097	0.00959056	-0.00296805	0.000833365	0.00433373	0.00535007	0	0.00100896
C	23	Sample X71	10109	9481	9148	9375	9390			C	23	0.00505846	-0.0150097	-0.0254742	-0.0183539	-0.0178814			C	23	0	0	0	0	0	0	0	0
C	24	Sample X72	11743	10721	11048	10979	10928			C	24	0.0594115	0.0250462	0.0359052	0.0336033	0.0319056			C	24	0	0	0	0	0	0	0	0
D	1	Sample X73	16611	18369	19768	20899	21049			D	1	0.242234	0.317254	0.380944	0.435258	0.442663			D	1	0.144314	0.272252	0.357514	0.397715	0.406056	0.0319846	0	0.0163589
D	2	Sample X74	16582	21981	25397	27715	28597			D	2	0.241041	0.489774	0.680496	0.828804	0.889938			D	2	0.201722	0.459132	0.647659	0.798162	0.860125	0.0643524	0	0.0411502
D	3	Sample X75	14825	16248	17654	18567	19097			D	3	0.171197	0.227391	0.286097	0.326044	0.349932			D	3	0.0732769	0.18239	0.262668	0.288501	0.313325	0.0272783	0	0.015003
D	4	Sample X76	15507	19154	21610	23064	23424			D	4	0.197742	0.352532	0.470789	0.54703	0.566692			D	4	0.158423	0.32189	0.437952	0.516387	0.53688	0.0408666	0	0.0236535
D	5	Sample X77	14242	15651	16907	17400	17913			D	5	0.14905	0.203437	0.254497	0.275246	0.297279			D	5	0.0511296	0.158435	0.231067	0.237702	0.260672	0.0268265	0	0.0130964
D	6	Sample X78	13270	15681	17182	17114	17266			D	6	0.113194	0.204627	0.26602	0.263159	0.269565			D	6	0.0738752	0.173985	0.233183	0.232516	0.239753	0.0250273	0	0.0103673
D	7	Sample X79	13377	14640	15530	15333	16515			D	7	0.117077	0.164116	0.198649	0.190903	0.238288			D	7	0.0191569	0.119115	0.175219	0.153359	0.201681	0.0249894	0	0.0114078
D	8	Sample X80	13082	14816	15767	15554	16177			D	8	0.106408	0.170851	0.208047	0.199597	0.224513			D	8	0.0670893	0.140209	0.17521	0.168954	0.1947	0.0182799	0	0.0079757
D	9	Sample X81	12481	13705	14513	14162	15113			D	9	0.0850283	0.129079	0.159283	0.146049	0.182321			D	9	-0.0128919	0.0840775	0.135854	0.108506	0.145715	0.0242424	0	0.0099129
D	10	Sample X82	11575	12721	12488	12422	13370			D	10	0.0536754	0.093509	0.0852746	0.0829549	0.116823			D	10	0.014357	0.0628665	0.0524373	0.0523123	0.08701	0.0121274	0	0.00454081
D	11	Sample X83	11095	12544	12894	13273	13475			D	11	0.0374764	0.0872472	0.0996689	0.113302	0.120648			D	11	-0.0604438	0.0422461	0.076239	0.075759	0.0840406	0.0256725	0	0.00903028
D	12	Sample X84	11341	12261	12387	12065	12484			D	12	0.0457435	0.0773196	0.081727	0.0705039	0.0851338			D	12	0.00642507	0.046677	0.0488897	0.0398613	0.0553213	0.010063	0	0.00305601
D	13	Sample X85	11621	12466	13160	13318	13373			D	13	0.0552425	0.0845007	0.109217	0.114934	0.116932			D	13	-0.0426777	0.0394995	0.0857875	0.0773905	0.0803247	0.0205443	0	0.00768765
D	14	Sample X86	11263	11397	11593	11370	11341			D	14	0.0431143	0.0476356	0.0542883	0.0467229	0.0457435			D	14	0.0037959	0.0169931	0.0214511	0.0160803	0.0159309	0.0032993	0	0.000758439
D	15	Sample X87	11920	12319	11792	11963	12345			D	15	0.0654928	0.0793459	0.0610911	0.0669761	0.0802556			D	15	-0.0324274	0.0343447	0.0376612	0.0294328	0.0436487	0.016693	0	0.00475475
D	16	Sample X88	11287	11960	11421	11096	11415			D	16	0.0439225	0.0668725	0.0484477	0.0375099	0.0482447			D	16	0.00460409	0.03623	0.0156105	0.00686731	0.0184321	0.00790647	0	0.000864249
D	17	Sample X89	12599	12953	12373	12834	12804			D	17	0.0891886	0.101779	0.0812363	0.0975281	0.0964594			D	17	-0.00873157	0.0567775	0.0578063	0.0599847	0.0598525	0.0163773	0	0.00428651
D	18	Sample X90	11188	11404	10991	11336	11242			D	18	0.0405932	0.0478724	0.0340032	0.0455747	0.0424077			D	18	0.00127478	0.0172299	0.00116596	0.0149322	0.0125951	0.00398877	0	0.000707523
D	19	Sample X91	10818	11128	10423	10594	10606			D	19	0.0282542	0.0385812	0.0152596	0.0208628	0.0212573			D	19	-0.069666	-0.00642	-0.0081703	-0.0166806	-0.0153496	0.0158115	0	0.00339477
D	20	Sample X92	11711	11687	11496	11578	11940			D	20	0.0583162	0.0574956	0.0509901	0.0537775	0.0661824			D	20	0.0189978	0.0268531	0.0181528	0.023135	0.0363698	0.00196381	0	0.00108575
D	21	Sample X93	13583	13829	13335	12873	13306			D	21	0.124597	0.133654	0.115551	0.0989191	0.114498			D	21	0.0266773	0.0886533	0.092121	0.0613757	0.0778916	0.015494	0	0.0032009
D	22	Sample X94	10595	10866	10588	10632	10702			D	22	0.0208956	0.0298458	0.0206656	0.0221125	0.0244192			D	22	-0.0184228	-0.000796797	-0.0121717	-0.00853001	-0.00539341	0.00440649	0	0.000814335
D	23	Sample X95	12845	11319	10672	11097	11069			D	23	0.0979202	0.0450012	0.0234299	0.0375433	0.0366069			D	23	0	0	0	0	0	0	0	0
D	24	Sample X96	11150	10890	10956	10890	10865			D	24	0.0393184	0.0306426	0.0328373	0.0306426	0.0298126			D	24	0	0	0	0	0	0	0	0
E	1	Sample X97	18988	22328	24734	26618	27810			E	1	0.344976	0.507817	0.641069	0.756495	0.835257			E	1	0.333693	0.512656	0.650785	0.762899	0.844114	0.0447407	0	0.0319013
E	2	Sample X98	36001	46121	49403	51477	52858			E	2	1.5403	3.17533	4.10943	4.90339	5.56121			E	2	1.52684	3.16359	4.10344	4.89613	5.55574	0.409189	0	0.251806
E	3	Sample X99	17707	21088	23509	25128	25858			E	3	0.288376	0.444596	0.571382	0.664349	0.70866			E	3	0.277093	0.449435	0.581098	0.670752	0.717517	0.0430854	0	0.0275265
E	4	Sample X100	37807	47218	50942	51968	50561			E	4	1.74899	3.45307	4.67896	5.12343	4.52803			E	4	1.73552	3.44133	4.67296	5.11617	4.52255	0.426451	0	0.174189
E	5	Sample X101	15904	18947	21080	22536	23366			E	5	0.21352	0.343118	0.444199	0.518767	0.563502			E	5	0.202237	0.347957	0.453915	0.525171	0.57236	0.0364298	0	0.0231326
E	6	Sample X102	33527	41818	44357	44592	41247			E	6	1.29098	2.31953	2.78516	2.83359	2.22746			E	6	1.27752	2.30779	2.77916	2.82633	2.22198	0.257569	0	0.059029
E	7	Sample X103	15435	18725	21097	22188	23123			E	7	0.194906	0.33311	0.445042	0.500504	0.55023			E	7	0.183624	0.337949	0.454758	0.506908	0.559087	0.0385815	0	0.0234665
E	8	Sample X104	27239	35997	38613	38864	38485			E	8	0.796938	1.53987	1.85069	1.88355	1.83416			E	8	0.783474	1.52813	1.8447	1.8763	1.82868	0.186164	0	0.0653253
E	9	Sample X105	15133	18076	20017	21232	22651			E	9	0.183099	0.304376	0.392677	0.451762	0.524866			E	9	0.171816	0.309215	0.402393	0.458166	0.533723	0.0343498	0	0.0226192
E	10	Sample X106	23189	31086	32655	31866	33675			E	10	0.55382	1.07865	1.21166	1.14329	1.30485			E	10	0.540356	1.06691	1.20567	1.13603	1.29938	0.131639	0	0.0474387
E	11	Sample X107	14233	17040	18335	19718	20650			E	11	0.148712	0.260054	0.315751	0.378602	0.423073			E	11	0.137429	0.264893	0.325467	0.385006	0.43193	0.031866	0	0.0184063
E	12	Sample X108	18421	24685	25800	26091	27250			E	12	0.319555	0.638204	0.705082	0.723136	0.797666			E	12	0.306091	0.626466	0.699086	0.715878	0.792188	0.0800937	0	0.0303811
E	13	Sample X109	12298	14653	15930	16436	17049			E	13	0.0786117	0.164612	0.214562	0.235052	0.260431			E	13	0.067329	0.169451	0.224278	0.241456	0.269288	0.0255304	0	0.0126225
E	14	Sample X110	15014	18972	20950	21492	22013			E	14	0.178484	0.34425	0.437771	0.464815	0.491427			E	14	0.165019	0.332512	0.431775	0.457557	0.485948	0.0418733	0	0.0200581
E	15	Sample X111	12917	14529	14566	15132	15769			E	15	0.100491	0.159891	0.161297	0.18306	0.208127			E	15	0.0892081	0.16473	0.171013	0.189463	0.216984	0.0188805	0	0.00798601
E	16	Sample X112	14252	17054	17807	17830	18825			E	16	0.149426	0.260641	0.292688	0.293683	0.337607			E	16	0.135961	0.248903	0.286692	0.286425	0.332128	0.0282354	0	0.0122605
E	17	Sample X113	11392	12516	12374	12866	13048			E	17	0.0474666	0.0862604	0.0812713	0.0986693	0.105185			E	17	0.0361839	0.0910994	0.0909873	0.105073	0.114043	0.0137289	0	0.00486618
E	18	Sample X114	12917	14875	14893	15448	16170			E	18	0.100491	0.17312	0.173813	0.195418	0.22423			E	18	0.0870262	0.161381	0.167817	0.18816	0.218751	0.0185888	0	0.00823281
E	19	Sample X115	11638	12550	11901	12652	12766			E	19	0.0558224	0.0874588	0.0648381	0.0910631	0.0951075			E	19	0.0445397	0.0922978	0.0745541	0.0974669	0.103965	0.0119395	0	0.00371407
E	20	Sample X116	12444	14204	13928	14228	14684			E	20	0.0837275	0.147623	0.137323	0.148524	0.165795			E	20	0.0702629	0.135885	0.131327	0.141266	0.160317	0.0164055	0	0.00562838
E	21	Sample X117	10535	10679	10082	10565	10717			E	21	0.0189257	0.0236606	0.00418655	0.0199101	0.0249142			E	21	0.007643	0.0284996	0.0139025	0.0263139	0.0337714	0.00521415	0	0.00163303
E	22	Sample X118	12085	12411	12378	12771	13007			E	22	0.0711971	0.0825688	0.0814115	0.0952853	0.103714			E	22	0.0577325	0.0708306	0.0754156	0.0880272	0.0982352	0.00327453	0	0.00253142
E	23	Sample X119	10301	9801	9648	9752	9675			E	23	0.0112827	-0.00483895	-0.009716	-0.00640372	-0.00885724			E	23	0	0	0	0	0	0	0	0
E	24	Sample X120	10368	10315	10138	10177	10122			E	24	0.0134646	0.0117382	0.00599588	0.00725806	0.00547857			E	24	0	0	0	0	0	0	0	0
F	1	Sample X121	29357	35952	39374	40841	40973			F	1	0.944913	1.53498	1.95217	2.16444	2.18471			F	1	0.889159	1.52558	1.93449	2.14931	2.17128	0.159105	0	0.0801325
F	2	Sample X122	36652	44315	46608	47615	47801			F	2	1.61266	2.77661	3.29494	3.56132	3.61358			F	2	1.57036	2.76948	3.28807	3.55465	3.60739	0.299781	0	0.127315
F	3	Sample X123	29666	37427	40995	42066	42143			F	3	0.967905	1.70296	2.18811	2.36083	2.37382			F	3	0.912151	1.69356	2.17043	2.3457	2.36039	0.195353	0	0.090515
F	4	Sample X124	33548	40657	43256	43464	42925			F	4	1.29294	2.13652	2.57102	2.60994	2.51047			F	4	1.25063	2.12939	2.56415	2.60326	2.50428	0.219689	0	0.0783527
F	5	Sample X125	26568	33849	37621	38446	38285			F	5	0.753293	1.32132	1.72631	1.82915	1.80862			F	5	0.697539	1.31193	1.70863	1.81402	1.79518	0.153597	0	0.0686028
F	6	Sample X126	25348	31837	34298	34665	35465			F	6	0.677539	1.14084	1.36463	1.40093	1.48297			F	6	0.635232	1.13371	1.35776	1.39425	1.47678	0.124619	0	0.0525965
F	7	Sample X127	24976	32535	36252	37319	36888			F	7	0.655316	1.20106	1.56784	1.6901	1.63967			F	7	0.599562	1.19167	1.55016	1.67497	1.62624	0.148026	0	0.0641672
F	8	Sample X128	20607	27906	30996	32252	31830			F	8	0.420982	0.841809	1.07137	1.17635	1.14024			F	8	0.378675	0.83468	1.0645	1.16968	1.13405	0.114001	0	0.0472112
F	9	Sample X129	22827	30515	33504	33186	35166			F	9	0.53426	1.03308	1.28883	1.25948	1.45182			F	9	0.478506	1.02368	1.27115	1.24435	1.43839	0.136294	0	0.0599927
F	10	Sample X130	17800	23288	24360	25915	28599			F	10	0.292386	0.559226	0.619368	0.712186	0.89008			F	10	0.250079	0.552097	0.612499	0.705511	0.88389	0.0755046	0	0.0396132
F	11	Sample X131	21733	29285	30959	32893	33773			F	11	0.477049	0.93961	1.06839	1.23291	1.31411			F	11	0.421295	0.930212	1.05071	1.21778	1.30068	0.127229	0	0.0549614
F	12	Sample X132	13974	18350	20135	21085	22635			F	12	0.139032	0.316414	0.398281	0.444447	0.524015			F	12	0.0967255	0.309285	0.391411	0.437772	0.517825	0.05314	0	0.0263187
F	13	Sample X133	19384	26798	29296	29879	31380			F	13	0.363089	0.768089	0.940419	0.983976	1.10268			F	13	0.307335	0.758691	0.922739	0.968848	1.08925	0.112839	0	0.0488697
F	14	Sample X134	13311	15675	17045	18254	19273			F	14	0.11468	0.204389	0.260264	0.312181	0.357982			F	14	0.072373	0.19726	0.253394	0.305506	0.351792	0.0312218	0	0.0174637
F	15	Sample X135	17454	23640	25760	26968	27836			F	15	0.277543	0.578646	0.70262	0.779135	0.837028			F	15	0.221789	0.569248	0.68494	0.764006	0.823596	0.0868648	0	0.0376129
F	16	Sample X136	12526	14274	14858	15413	16647			F	16	0.0866127	0.150253	0.172466	0.194041	0.243718			F	16	0.0443059	0.143124	0.165596	0.187366	0.237528	0.0247046	0	0.0120764
F	17	Sample X137	15633	19526	21474	22384	23364			F	17	0.202723	0.369658	0.463907	0.510755	0.563393			F	17	0.146969	0.36026	0.446227	0.495626	0.549961	0.0533228	0	0.025187
F	18	Sample X138	11872	13115	12942	13884	14588			F	18	0.0638398	0.107595	0.101385	0.135691	0.162134			F	18	0.021533	0.100467	0.0945155	0.129016	0.155944	0.0197335	0	0.00840072
F	19	Sample X139	13713	16679	16629	18287	18779			F	19	0.129373	0.245039	0.242976	0.313634	0.335536			F	19	0.0736191	0.235641	0.225296	0.298505	0.322104	0.0405054	0	0.0155303
F	20	Sample X140	10833	12036	11255	12309	12694			F	20	0.0287513	0.0694995	0.0428451	0.0789962	0.0925512			F	20	-0.0135555	0.062371	0.0359756	0.0723209	0.0863613	0.0189816	0	0.0062448
F	21	Sample X141	13665	15544	16776	17495	18083			F	21	0.127607	0.199202	0.249052	0.279291	0.304682			F	21	0.071853	0.189804	0.231372	0.264162	0.29125	0.0294877	0	0.0137123
F	22	Sample X142	10393	10988	11238	11523	11793			F	22	0.0142801	0.0339032	0.0422732	0.051907	0.0611255			F	22	-0.0280267	0.0267747	0.0354037	0.0452317	0.0549355	0.0137004	0	0.00518514
F	23	Sample X143	11636	10243	10497	10419	10367			F	23	0.0557541	0.00939801	0.0176802	0.0151289	0.013432			F	23	0	0	0	0	0	0	0	0
F	24	Sample X144	11239	10173	10165	10159	10144			F	24	0.0423068	0.00712853	0.00686952	0.0066753	0.00618995			F	24	0	0	0	0	0	0	0	0
G	1	Sample X145	20867	26523	30820	31441	33379			G	1	0.433685	0.750417	1.05724	1.10772	1.27723			G	1	0.392958	0.711267	1.03789	1.08032	1.24718	0.0795772	0	0.0533891
G	2	Sample X146	41259	51886	55741	57644	55540			G	2	2.22935	5.08568	7.45459	9.34368	7.29169			G	2	2.14485	4.97802	7.38478	9.26754	7.21573	0.708291	1	0.31693
G	3	Sample X147	20266	27765	32757	36438	37740			G	3	0.404535	0.832196	1.22073	1.58854	1.74079			G	3	0.363808	0.793046	1.20138	1.56114	1.71074	0.107309	0	0.0841833
G	4	Sample X148	37353	48939	53305	55002	54069			G	4	1.69414	3.95677	5.80256	6.88253	6.25369			G	4	1.60963	3.8491	5.73275	6.8064	6.17773	0.559866	0	0.285506
G	5	Sample X149	17692	23693	28040	30543	31951			G	5	0.287731	0.581598	0.851009	1.03528	1.15051			G	5	0.247003	0.542447	0.831657	1.00789	1.12046	0.073861	0	0.0545913
G	6	Sample X150	29017	38784	42025	40651	42892			G	6	0.920047	1.87302	2.35395	2.13561	2.50452			G	6	0.835546	1.76535	2.28414	2.05948	2.42856	0.232451	0	0.0995635
G	7	Sample X151	20105	27241	31808	34760	36995			G	7	0.396854	0.797071	1.13839	1.41045	1.65205			G	7	0.356126	0.75792	1.11903	1.38306	1.62201	0.100448	0	0.0791176
G	8	Sample X152	25919	35024	38788	39312	39104			G	8	0.712434	1.43723	1.87354	1.94369	1.91553			G	8	0.627934	1.32957	1.80373	1.86756	1.83957	0.175408	0	0.0757273
G	9	Sample X153	18837	25449	29572	32348	34964			G	9	0.338148	0.683642	0.96087	1.18469	1.43111			G	9	0.29742	0.644491	0.941518	1.1573	1.40106	0.0867677	0	0.0689777
G	10	Sample X154	16664	20633	21873	22905	23787			G	10	0.244419	0.422246	0.484216	0.538448	0.58685			G	10	0.159919	0.314578	0.414404	0.462314	0.510891	0.0386649	0	0.0219357
G	11	Sample X155	19835	27015	30991	34089	36075			G	11	0.384089	0.782205	1.07097	1.34433	1.54837			G	11	0.343361	0.743054	1.05162	1.31693	1.51833	0.0999233	0	0.0734355
G	12	Sample X156	15446	18336	19529	20990	21432			G	12	0.195339	0.315795	0.369797	0.439745	0.46179			G	12	0.110838	0.208128	0.299986	0.363611	0.38583	0.0243225	0	0.017187
G	13	Sample X157	16910	22310	25218	27307	29025			G	13	0.254622	0.506874	0.669728	0.801444	0.920627			G	13	0.213894	0.467724	0.650376	0.774051	0.890582	0.0634573	0	0.042293
G	14	Sample X158	14753	18008	19676	19601	20623			G	14	0.168435	0.301409	0.37664	0.373143	0.42176			G	14	0.0839345	0.193742	0.306828	0.297009	0.3458	0.0274519	0	0.0163666
G	15	Sample X159	15852	20083	22370	23904	25278			G	15	0.211439	0.395808	0.51002	0.59342	0.673327			G	15	0.170712	0.356657	0.490668	0.566026	0.643282	0.0464863	0	0.0295357
G	16	Sample X160	14242	16437	17468	17317	17973			G	16	0.14905	0.235093	0.27814	0.271724	0.299886			G	16	0.0645491	0.127426	0.208329	0.19559	0.223926	0.0157191	0	0.00996106
G	17	Sample X161	17590	20044	21267	22482	23397			G	17	0.283353	0.393957	0.45351	0.515915	0.565206			G	17	0.242625	0.354806	0.434158	0.488521	0.535161	0.0280452	0	0.0182835
G	18	Sample X162	12830	15352	14413	15014	15884			G	18	0.0973855	0.191647	0.155495	0.178484	0.212719			G	18	0.0128848	0.0839799	0.0856839	0.10235	0.13676	0.0177738	0	0.00774218
G	19	Sample X163	14601	15873	16458	17068	17699			G	19	0.162629	0.212279	0.235952	0.261228	0.288032			G	19	0.121902	0.173128	0.2166	0.233835	0.257987	0.0128066	0	0.00850531
G	20	Sample X164	13144	14757	14283	14308	14762			G	20	0.10864	0.168588	0.150591	0.151532	0.16878			G	20	0.0241397	0.060921	0.0807802	0.0753987	0.0928205	0.00919533	0	0.00429255
G	21	Sample X165	12566	13188	13558	14011	14202			G	21	0.0880233	0.110228	0.123682	0.140409	0.147548			G	21	0.0472958	0.0710772	0.10433	0.113016	0.117503	0.00594533	0	0.00438797
G	22	Sample X166	14112	14514	14912	14889	14967			G	22	0.144178	0.159321	0.174545	0.173659	0.176667			G	22	0.0596772	0.051654	0.104734	0.0975248	0.100707	-0.00200579	0	0.00256437
G	23	Sample X167	11192	11145	10548	10792	10872			G	23	0.0407275	0.0391508	0.0193522	0.0273933	0.0300449			G	23	0	0	0	0	0	0	0	0
G	24	Sample X168	12466	13117	12045	12227	12222			G	24	0.0845007	0.107667	0.0698111	0.0761338	0.0759595			G	24	0	0	0	0	0	0	0	0
H	1	Sample X169	18142	22553	24731	26107	26055			H	1	0.307263	0.519667	0.640893	0.724137	0.720889			H	1	0.259289	0.479845	0.627917	0.705473	0.701274	0.055139	0	0.0276241
H	2	Sample X170	20993	27986	30411	31171	31079			H	2	0.439893	0.847294	1.02494	1.08556	1.07808			H	2	0.421459	0.821356	1.04171	1.07632	1.06862	0.0999742	0	0.0404475
H	3	Sample X171	16133	19723	21142	22291	24049			H	3	0.222733	0.378836	0.447278	0.50588	0.601611			H	3	0.174759	0.339015	0.434302	0.487217	0.581996	0.0410639	0	0.0254523
H	4	Sample X172	17925	23378	25613	26423	25616			H	4	0.297799	0.564162	0.693614	0.744051	0.693797			H	4	0.279366	0.538224	0.710392	0.734815	0.684334	0.0647145	0	0.0253106
H	5	Sample X173	15255	18828	20227	21092	23022			H	5	0.187852	0.337742	0.40267	0.444794	0.544757			H	5	0.139878	0.297921	0.389694	0.426131	0.525142	0.0395106	0	0.024079
H	6	Sample X174	15504	19600	21771	21153	22822			H	6	0.197623	0.373097	0.47899	0.447825	0.533992			H	6	0.17919	0.347159	0.495768	0.438589	0.524529	0.0419923	0	0.0215837
H	7	Sample X175	14100	17395	18750	19546	20792			H	7	0.143729	0.275033	0.334233	0.370586	0.430006			H	7	0.0957554	0.235212	0.321257	0.351923	0.410391	0.0348641	0	0.0196647
H	8	Sample X176	13489	15861	16911	16546	18275			H	8	0.121159	0.211799	0.254664	0.239561	0.313105			H	8	0.102725	0.185861	0.271442	0.230325	0.303642	0.0207841	0	0.0125574
H	9	Sample X177	13832	16528	17961	18855	19944			H	9	0.133765	0.238822	0.299364	0.338959	0.389224			H	9	0.0857915	0.199	0.286388	0.320296	0.36961	0.0283022	0	0.0177386
H	10	Sample X178	12000	13787	14750	14799	15177			H	10	0.0682543	0.132102	0.16832	0.170199	0.18481			H	10	0.0498204	0.106164	0.185098	0.160963	0.175347	0.0140859	0	0.00784544
H	11	Sample X179	13017	15830	16643	17106	18030			H	11	0.104072	0.21056	0.243553	0.262823	0.302368			H	11	0.0560986	0.170739	0.230577	0.244159	0.282754	0.0286601	0	0.0141659
H	12	Sample X180	11623	12956	13646	13158	13189			H	12	0.0553107	0.101886	0.126909	0.109145	0.110264			H	12	0.0368769	0.075948	0.143687	0.0999095	0.100801	0.00976778	0	0.00399527
H	13	Sample X181	12835	14983	15322	15631	16675			H	13	0.0975637	0.177285	0.190472	0.202644	0.244874			H	13	0.0495898	0.137463	0.177496	0.18398	0.225259	0.0219684	0	0.0109793
H	14	Sample X182	10884	11944	12437	11695	11522			H	14	0.0304433	0.0663204	0.0834816	0.0577691	0.051873			H	14	0.0120094	0.0403823	0.10026	0.0485334	0.0424101	0.00709322	0	0.00190004
H	15	Sample X183	12361	13713	13494	13430	13970			H	15	0.0808158	0.129373	0.121341	0.119006	0.138884			H	15	0.0328419	0.0895518	0.108366	0.100343	0.119269	0.0141775	0	0.00540168
H	16	Sample X184	10281	10760	11287	10405	10516			H	16	0.0106324	0.0263347	0.0439225	0.0146718	0.0183027			H	16	-0.00780149	0.000396644	0.0607005	0.00543605	0.0088398	0.00204953	0	0.00104008
H	17	Sample X185	11124	12167	12900	11871	12478			H	17	0.0384472	0.0740447	0.0998833	0.0638054	0.0849227			H	17	-0.00952673	0.0342233	0.0869076	0.045142	0.065308	0.0109375	0	0.00467717
H	18	Sample X186	10853	11391	11164	10337	10606			H	18	0.0294144	0.0474327	0.0397879	0.0124544	0.0212573			H	18	0.0109806	0.0214947	0.0565658	0.0032187	0.0117943	0.00262852	0	5.08581e-05
H	19	Sample X187	11296	12043	12310	11364	11481			H	19	0.0442258	0.0697419	0.0790312	0.0465202	0.050481			H	19	-0.00374817	0.0299204	0.0660555	0.0278568	0.0308663	0.00841715	0	0.00216341
H	20	Sample X188	10965	11509	11806	10862	10309			H	20	0.033137	0.0514314	0.0615716	0.029713	0.0115429			H	20	0.0147031	0.0254934	0.0783495	0.0204773	0.00208001	0.00269756	0	-0.000788943
H	21	Sample X189	10988	11543	11032	11199	11466			H	21	0.0339032	0.0525867	0.0353709	0.0409625	0.0499723			H	21	-0.0140707	0.0127653	0.0223953	0.0222992	0.0303576	0.00670901	0	0.00277677
H	22	Sample X190	11084	11588	10970	10576	10741			H	22	0.0371084	0.054118	0.0333035	0.0202714	0.0257068			H	22	0.0186746	0.02818	0.0500814	0.0110357	0.0162438	0.00237634	0	-0.000151923
H	23	Sample X191	11407	11165	10353	10527	10556			H	23	0.0479739	0.0398214	0.0129757	0.0186633	0.0196147			H	23	0	0	0	0	0	0	0	0
H	24	Sample X192	10520	10748	9425	10238	10245			H	24	0.0184339	0.0259381	-0.016778	0.00923572	0.00946294			H	24	0	0	0	0	0	0	0	0
I	1	Sample X193	10978	13929	15060	15009	15216			I	1	0.03357	0.13736	0.180265	0.17829	0.18633			I	1	0.00309349	0.0892509	0.177143	0.171518	0.185076	0.0215393	0	0.0113739
I	2	Sample X194	13382	15382	16766	17136	17519			I	2	0.117259	0.192824	0.248638	0.264084	0.280316			I	2	0.0922457	0.134371	0.234423	0.243352	0.256952	0.0105313	0	0.0102941
I	3	Sample X195	11233	11137	11651	12020	12343			I	3	0.0421051	0.0388827	0.056266	0.0689459	0.0801856			I	3	0.0116286	-0.00922657	0.053144	0.0621735	0.0789316	-0.00521378	0	0.00420644
I	4	Sample X196	13558	13703	13505	14359	14742			I	4	0.123682	0.129005	0.121743	0.153455	0.168014			I	4	0.0986685	0.070552	0.107528	0.132724	0.14465	-0.00702913	0	0.00287384
I	5	Sample X197	10939	12015	11036	11493	11629			I	5	0.0322715	0.0687729	0.0355045	0.0508882	0.0555154			I	5	0.00179497	0.0206636	0.0323825	0.0441158	0.0542614	0.00471717	0	0.00327915
I	6	Sample X198	11253	11607	11270	11960	12242			I	6	0.0427778	0.0547653	0.04335	0.0668725	0.0766567			I	6	0.0177646	-0.00368778	0.0291351	0.0461412	0.0532927	-0.00536308	0	0.00222051
I	7	Sample X199	10780	12018	11096	10808	11042			I	7	0.0269962	0.0688767	0.0375099	0.027923	0.0357048			I	7	-0.00348035	0.0207674	0.0343879	0.0211506	0.0344509	0.00606194	0	0.0023707
I	8	Sample X200	13216	13743	13245	13017	13086			I	8	0.11124	0.130479	0.112289	0.104072	0.106552			I	8	0.0862264	0.0720256	0.0980737	0.0833412	0.0831876	-0.0035502	0	-0.000189926
I	9	Sample X201	10016	10533	9877	9985	10156			I	9	0.00205868	0.0188601	-0.00240665	0.00106093	0.00657821			I	9	-0.0284178	-0.0292492	-0.00552865	-0.00571147	0.00532425	-0.000207842	0	0.00210888
I	10	Sample X202	12209	12797	12298	11912	11990			I	10	0.0755066	0.0962103	0.0786117	0.0652171	0.0679086			I	10	0.0504934	0.0377572	0.0643969	0.0444858	0.0445446	-0.00318405	0	-0.000371795
I	11	Sample X203	10173	11160	10414	10106	10149			I	11	0.00712853	0.0396537	0.0149656	0.00496154	0.00635171			I	11	-0.023348	-0.00845556	0.0118436	-0.00181086	0.00509775	0.0037231	0	0.00177786
I	12	Sample X204	12049	13301	12570	11800	11486			I	12	0.0699496	0.114317	0.0881645	0.0613657	0.0506507			I	12	0.0449364	0.0558641	0.0739497	0.0406343	0.0272867	0.00273192	0	-0.00110311
I	13	Sample X205	10480	10658	10204	9906	9855			I	13	0.0171236	0.0229686	0.0081329	-0.00147683	-0.0031114			I	13	-0.0133529	-0.0251407	0.0050109	-0.00824923	-0.00436536	-0.00294693	0	0.000561724
I	14	Sample X206	11409	12582	12100	11602	11716			I	14	0.0480416	0.0885882	0.0717174	0.0545949	0.0584873			I	14	0.0230284	0.0301351	0.0575026	0.0338636	0.0351233	0.00177667	0	0.000755932
I	15	Sample X207	10003	9876	9814	9861	9745			I	15	0.00164014	-0.00243869	-0.00442336	-0.00291925	-0.00662704			I	15	-0.0288364	-0.050548	-0.00754535	-0.00969166	-0.007881	-0.0054279	0	0.00130971
I	16	Sample X208	11292	12210	11892	11159	10912			I	16	0.044091	0.0755414	0.0645282	0.0396202	0.0313736			I	16	0.0190778	0.0170883	0.0503134	0.0188889	0.00800956	-0.000497358	0	-0.000691762
I	17	Sample X209	10165	10118	10707	9651	8981			I	17	0.00686952	0.00534928	0.0245841	-0.00962062	-0.0306769			I	17	-0.023607	-0.04276	0.0214621	-0.016393	-0.0319309	-0.00478825	0	-0.000520242
I	18	Sample X210	11923	12630	11619	10782	11140			I	18	0.0655962	0.0902846	0.0551744	0.0270623	0.0389832			I	18	0.040583	0.0318315	0.0409595	0.006331	0.0156192	-0.00218787	0	-0.00156023
I	19	Sample X211	10671	11076	10348	10217	10356			I	19	0.023397	0.0368409	0.0128128	0.00855441	0.0130734			I	19	-0.00707955	-0.0112684	0.00969075	0.001782	0.0118195	-0.0010472	0	0.00118119
I	20	Sample X212	11405	12433	11437	10920	11137			I	20	0.0479063	0.0833411	0.0489895	0.0316395	0.0388827			I	20	0.022893	0.024888	0.0347747	0.0109082	0.0155187	0.000498737	0	-0.000460896
I	21	Sample X213	11090	11520	11107	10257	9982			I	21	0.0373091	0.051805	0.037878	0.00985258	0.000964432			I	21	0.00683264	0.00369576	0.034756	0.00308018	-0.000289528	-0.000784218	0	-0.000445135
I	22	Sample X214	10802	10806	10577	10386	10546			I	22	0.0277243	0.0278567	0.0203042	0.0140517	0.0192865			I	22	0.00271108	-0.0305963	0.0060894	-0.00667964	-0.00407746	-0.00832685	0	-0.000424284
I	23	Sample X215	10885	11411	10049	10162	9991			I	23	0.0304765	0.0481093	0.003122	0.00677241	0.00125396			I	23	0	0	0	0	0	0	0	0
I	24	Sample X216	10720	11715	10391	10590	10670			I	24	0.0250132	0.0584531	0.0142148	0.0207313	0.023364			I	24	0	0	0	0	0	0	0	0
J	1	Sample X217	29556	30809	31823	31903	30904			J	1	0.959677	1.05636	1.13965	1.14643	1.06397			J	1	0.903923	1.00636	1.10558	1.10959	1.03057	0.0256089	0	0.00791518
J	2	Sample X218	44856	52708	53545	53820	53568			J	2	2.88923	5.48361	5.93876	6.10091	5.95206			J	2	2.84254	5.44009	5.91888	6.07742	5.92985	0.649388	1	0.192957
J	3	Sample X219	34480	38981	39603	38980	39213			J	3	1.38253	1.89907	1.9838	1.89894	1.93023			J	3	1.32677	1.84907	1.94973	1.8621	1.89683	0.130573	0	0.0356285
J	4	Sample X220	40107	50600	54893	56316	53729			J	4	2.05533	4.54316	6.80407	7.95444	6.04651			J	4	2.00865	4.49964	6.78419	7.93094	6.0243	0.622748	1	0.250978
J	5	Sample X221	24982	28290	29513	28671	29654			J	5	0.655671	0.868343	0.956473	0.895195	0.967005			J	5	0.599917	0.818337	0.922403	0.858354	0.933602	0.0546049	0	0.0208553
J	6	Sample X222	35793	47169	51788	51540	50059			J	6	1.51782	3.44001	5.04111	4.93084	4.33954			J	6	1.47113	3.39649	5.02123	4.90735	4.31733	0.48134	0	0.177887
J	7	Sample X223	24712	30954	30660	33420	34640			J	7	0.639781	1.06799	1.04452	1.28103	1.39843			J	7	0.584027	1.01798	1.01045	1.24418	1.36502	0.108488	0	0.0488123
J	8	Sample X224	34007	45695	48683	48092	51058			J	8	1.33643	3.07519	3.87585	3.69741	4.72634			J	8	1.28974	3.03167	3.85597	3.67391	4.70413	0.435483	0	0.213399
J	9	Sample X225	21046	27024	28579	28822	31036			J	9	0.442514	0.782794	0.888662	0.905985	1.0746			J	9	0.38676	0.732788	0.854592	0.869144	1.0412	0.0865069	0	0.0409024
J	10	Sample X226	31313	44092	48065	49108	50180			J	10	1.09717	2.73174	3.68952	4.01145	4.38394			J	10	1.05048	2.68822	3.66965	3.98796	4.36173	0.409434	0	0.206953
J	11	Sample X227	19366	25063	26405	26287	28677			J	11	0.362259	0.660478	0.742908	0.735442	0.895622			J	11	0.306505	0.610472	0.708838	0.698601	0.862219	0.0759916	0	0.0347321
J	12	Sample X228	26540	40378	43080	43743	44335			J	12	0.751503	2.09492	2.53861	2.66324	2.78068			J	12	0.704814	2.0514	2.51874	2.63974	2.75847	0.336646	0	0.128353
J	13	Sample X229	16542	20508	22627	23888	24273			J	13	0.239397	0.416182	0.52359	0.592519	0.614375			J	13	0.183642	0.366176	0.48952	0.555678	0.580971	0.0456334	0	0.0248331
J	14	Sample X230	22179	33613	36253	37374	38774			J	14	0.500035	1.29903	1.56795	1.69664	1.8717			J	14	0.453346	1.25551	1.54807	1.67314	1.84949	0.200541	0	0.0872592
J	15	Sample X231	14748	18035	18530	18808	19744			J	15	0.168244	0.302586	0.324396	0.336841	0.379819			J	15	0.11249	0.25258	0.290326	0.3	0.346416	0.0350226	0	0.0146204
J	16	Sample X232	18810	28023	29344	29910	31538			J	16	0.336931	0.849838	0.943954	0.986331	1.11576			J	16	0.290242	0.80632	0.924077	0.962835	1.09355	0.129019	0	0.0502068
J	17	Sample X233	14332	16997	17239	17435	17983			J	17	0.152437	0.258254	0.268424	0.276734	0.300321			J	17	0.0966826	0.208248	0.234355	0.239893	0.266917	0.0278913	0	0.0106397
J	18	Sample X234	17591	23149	23484	24965	26697			J	18	0.283395	0.551643	0.570001	0.654665	0.761571			J	18	0.236706	0.508125	0.550124	0.631169	0.739359	0.0678546	0	0.0314158
J	19	Sample X235	11025	12485	12221	12228	12617			J	19	0.0351373	0.085169	0.0759247	0.0761686	0.0898249			J	19	-0.0206169	0.0351628	0.0418548	0.0393277	0.0564214	0.0139449	0	0.00481489
J	20	Sample X236	15329	18545	18811	19855	21414			J	20	0.190746	0.325064	0.336976	0.385029	0.460884			J	20	0.144057	0.281546	0.317099	0.361533	0.438672	0.0343721	0	0.0184135
J	21	Sample X237	12853	13542	12865	13287	13495			J	21	0.0982055	0.123096	0.0986336	0.11381	0.121378			J	21	0.0424514	0.0730899	0.0645637	0.0769687	0.0879744	0.00765963	0	0.00284519
J	22	Sample X238	16191	17745	18556	19198	20262			J	22	0.22508	0.290013	0.325554	0.354544	0.404344			J	22	0.178391	0.246494	0.305677	0.331048	0.382133	0.0170258	0	0.0127339
J	23	Sample X239	11636	11467	10993	11076	10973			J	23	0.0557541	0.0500062	0.0340699	0.0368409	0.0334034			J	23	0	0	0	0	0	0	0	0
J	24	Sample X240	11369	11275	10564	10674	10635			J	24	0.0466891	0.0435183	0.0198773	0.0234958	0.0222113			J	24	0	0	0	0	0	0	0	0
K	1	Sample X241	30630	31883	32147	33026	33418			K	1	1.04214	1.14473	1.16729	1.24491	1.28084			K	1	0.998962	1.09808	1.15114	1.22352	1.25879	0.0247784	0	0.0162395
K	2	Sample X242	35117	45494	46370	48268	49302			K	2	1.44677	3.02932	3.23578	3.74937	4.07552			K	2	1.43747	3.02161	3.24081	3.75155	4.07655	0.396033	0	0.164942
K	3	Sample X243	20784	23481	22285	22361	23275			K	3	0.429614	0.569835	0.505566	0.509548	0.558515			K	3	0.386433	0.52318	0.489424	0.488159	0.536468	0.0341868	0	0.00937721
K	4	Sample X244	34105	46046	45267	48950	50140			K	4	1.34587	3.15741	2.97853	3.9603	4.36919			K	4	1.33657	3.1497	2.98356	3.96248	4.37022	0.453281	0	0.189603
K	5	Sample X245	18807	21395	19596	19908	20427			K	5	0.336796	0.459928	0.372911	0.387525	0.412271			K	5	0.293614	0.413273	0.356768	0.366137	0.390224	0.0299146	0	0.00603808
K	6	Sample X246	33028	47095	46530	50548	53066			K	6	1.24509	3.4204	3.2754	4.523	5.67159			K	6	1.23579	3.41269	3.28043	4.52519	5.67262	0.544225	0	0.277302
K	7	Sample X247	14204	15478	14410	15019	15304			K	7	0.147623	0.196599	0.155382	0.178677	0.189767			K	7	0.104442	0.149943	0.139239	0.157288	0.167721	0.0113755	0	0.00395494
K	8	Sample X248	28274	40824	40604	44648	47575			K	8	0.867227	2.16184	2.12855	2.84528	3.55022			K	8	0.857926	2.15413	2.13358	2.84747	3.55124	0.324051	0	0.168332
K	9	Sample X249	13601	14881	13600	13938	14264			K	9	0.125257	0.173351	0.125221	0.137694	0.149877			K	9	0.0820757	0.126695	0.109079	0.116306	0.12783	0.0111549	0	0.00285964
K	10	Sample X250	26308	37755	41333	42810	47294			K	10	0.736768	1.74262	2.24106	2.48982	3.47345			K	10	0.727467	1.73491	2.24609	2.492	3.47448	0.25186	0	0.171688
K	11	Sample X251	12630	13848	12303	12190	12831			K	11	0.0902846	0.134357	0.0787865	0.074845	0.0974212			K	11	0.047103	0.0877022	0.0626444	0.0534562	0.0753744	0.0101498	0	0.00176697
K	12	Sample X252	24404	35196	37675	38688	41901			K	12	0.621901	1.45492	1.73286	1.86045	2.33326			K	12	0.612601	1.44721	1.7379	1.86263	2.33429	0.208652	0	0.107605
K	13	Sample X253	12131	12792	12096	12173	12434			K	13	0.0727935	0.0960323	0.0715786	0.0742534	0.0833762			K	13	0.0296119	0.049377	0.0554365	0.0528646	0.0613295	0.00494129	0	0.00198235
K	14	Sample X254	21024	30109	31647	32794	35399			K	14	0.441425	1.00154	1.12485	1.22404	1.47604			K	14	0.432125	0.993828	1.12988	1.22622	1.47707	0.140426	0	0.0653089
K	15	Sample X255	12488	13183	12166	12143	12136			K	15	0.0852746	0.110047	0.07401	0.0732104	0.0729672			K	15	0.0420929	0.0633921	0.0578679	0.0518216	0.0509205	0.0053248	0	0.000551721
K	16	Sample X256	17446	23217	24083	25174	27251			K	16	0.277203	0.555347	0.60354	0.667095	0.797732			K	16	0.267902	0.547635	0.608571	0.669278	0.79876	0.0699333	0	0.0331786
K	17	Sample X257	11101	11749	10568	10450	10479			K	17	0.0376772	0.059617	0.0200086	0.0161421	0.0170908			K	17	-0.00550446	0.0129617	0.00386658	-0.00524672	-0.00495589	0.00461655	0	3.42854e-05
K	18	Sample X258	14873	18541	19319	20573	22051			K	18	0.173043	0.324886	0.360095	0.419331	0.493392			K	18	0.163742	0.317174	0.365126	0.421514	0.494419	0.038358	0	0.0206673
K	19	Sample X259	15221	16201	14609	14413	14501			K	19	0.186525	0.225485	0.162934	0.155495	0.158828			K	19	0.143343	0.17883	0.146792	0.134106	0.136781	0.00887161	0	-0.000410122
K	20	Sample X260	13785	15738	15891	16863	17930			K	20	0.132028	0.206893	0.212999	0.252665	0.298017			K	20	0.122728	0.199181	0.21803	0.254847	0.299044	0.0191134	0	0.0110198
K	21	Sample X261	12021	13048	11232	11225	11285			K	21	0.0689805	0.105185	0.0420714	0.0418361	0.0438551			K	21	0.0257988	0.0585302	0.0259294	0.0204473	0.0218084	0.00818284	0	-0.000249401
K	22	Sample X262	554	582	563	543	560			K	22	-0.259256	-0.258593	-0.259043	-0.259517	-0.259114			K	22	-0.268557	-0.266304	-0.254012	-0.257334	-0.258086	0.000563126	1	0.000654398
K	23	Sample X263	11265	11368	10450	10610	10630			K	23	0.0431816	0.0466553	0.0161421	0.0213888	0.0220467			K	23	0	0	0	0	0	0	0	0
K	24	Sample X264	10240	10191	9795	9884	9920			K	24	0.00930063	0.00771158	-0.0050307	-0.0021823	-0.00102761			K	24	0	0	0	0	0	0	0	0
L	1	Sample X265	34541	36107	35795	35107	35446			L	1	1.38857	1.55188	1.51803	1.44574	1.48097			L	1	1.3189	1.50404	1.48069	1.40057	1.43458	0.0462847	0	0.00723034
L	2	Sample X266	40090	43777	44636	45105	45703			L	2	2.05288	2.66982	2.84277	2.94293	3.07703			L	2	1.90874	2.53368	2.7346	2.82927	2.96108	0.156237	0	0.0657716
L	3	Sample X267	30828	34470	32723	33994	35834			L	3	1.05788	1.38154	1.2177	1.33518	1.52223			L	3	0.988209	1.3337	1.18036	1.29001	1.47584	0.086373	0	0.030477
L	4	Sample X268	39860	46596	44491	45535	46625			L	4	2.01995	3.29193	2.81265	3.0386	3.29922			L	4	1.87581	3.15579	2.70448	2.92494	3.18327	0.319996	0	0.0817164
L	5	Sample X269	24044	29540	27407	29297	30698			L	5	0.601328	0.958484	0.808098	0.940492	1.04753			L	5	0.531655	0.910645	0.770755	0.895323	1.00114	0.0947475	0	0.0293431
L	6	Sample X270	30347	33800	35607	37241	38370			L	6	1.01994	1.31667	1.49796	1.68086	1.81943			L	6	0.875804	1.18053	1.38979	1.5672	1.70348	0.0761821	0	0.0517295
L	7	Sample X271	21757	27240	25646	28278	29735			L	7	0.478274	0.797005	0.69563	0.867506	0.973091			L	7	0.408602	0.749166	0.658288	0.822336	0.926706	0.0851411	0	0.0323815
L	8	Sample X272	28446	33925	33292	34643	37208			L	8	0.879273	1.32857	1.2692	1.39873	1.67697			L	8	0.735133	1.19244	1.16103	1.28506	1.56102	0.114326	0	0.0516178
L	9	Sample X273	18171	22576	22762	25263	26170			L	9	0.308534	0.520885	0.530782	0.672426	0.728082			L	9	0.238862	0.473046	0.493439	0.627257	0.681697	0.0585461	0	0.0276772
L	10	Sample X274	21560	25616	26473	27210	29536			L	10	0.468254	0.693797	0.74723	0.795022	0.958186			L	10	0.324114	0.557662	0.639058	0.681357	0.842235	0.058387	0	0.0323826
L	11	Sample X275	16871	21276	21515	23161	24069			L	11	0.252998	0.453961	0.465977	0.552296	0.602745			L	11	0.183325	0.406122	0.428635	0.507126	0.55636	0.0556992	0	0.0233147
L	12	Sample X276	17666	20829	21044	21893	24030			L	12	0.286613	0.43182	0.442415	0.485243	0.600535			L	12	0.142472	0.295684	0.334243	0.371578	0.484584	0.0383029	0	0.021382
L	13	Sample X277	15514	18783	19202	20291	21334			L	13	0.198018	0.335716	0.354727	0.405733	0.456865			L	13	0.128345	0.287877	0.317385	0.360563	0.41048	0.0398831	0	0.0176334
L	14	Sample X278	11925	14311	13893	14535	15931			L	14	0.0656652	0.151645	0.136024	0.160119	0.214602			L	14	-0.0784753	0.0155097	0.0278527	0.0464543	0.0986516	0.0234963	0	0.0110704
L	15	Sample X279	13670	16045	15957	16753	17618			L	15	0.127791	0.219183	0.215645	0.248099	0.284553			L	15	0.0581184	0.171344	0.178302	0.202929	0.238168	0.0283065	0	0.0112531
L	16	Sample X280	11139	12435	12227	12829	13591			L	16	0.0389497	0.0834113	0.0761338	0.0973499	0.124891			L	16	-0.105191	-0.0527244	-0.032038	-0.0163147	0.00894031	0.0131166	0	0.00713319
L	17	Sample X281	15067	17155	16545	17525	17787			L	17	0.180536	0.264883	0.23952	0.280572	0.291824			L	17	0.110864	0.217045	0.202177	0.235402	0.245439	0.0265452	0	0.00841098
L	18	Sample X282	7031	7285	6914	7230	7517			L	18	-0.0892827	-0.0818657	-0.0926781	-0.0834771	-0.0750358			L	18	-0.233423	-0.218001	-0.20085	-0.197142	-0.190986	0.00385543	0	0.00265231
L	19	Sample X283	12196	13173	12888	13265	13769			L	19	0.0750539	0.109686	0.0994546	0.113013	0.131438			L	19	0.00538125	0.0618479	0.062112	0.0678427	0.0850527	0.0141166	0	0.00497946
L	20	Sample X284	2769	2831	2650	2727	2802			L	20	-0.204986	-0.203413	-0.207996	-0.20605	-0.204149			L	20	-0.349126	-0.339548	-0.316168	-0.319714	-0.320099	0.00239444	1	0.00181419
L	21	Sample X285	12290	12632	12007	12440	12535			L	21	0.0783322	0.0903554	0.0684963	0.083587	0.0869299			L	21	0.00865958	0.0425167	0.0311537	0.0384171	0.0405449	0.00846429	0	0.00199283
L	22	Sample X286	149	136	124	126	132			L	22	-0.26879	-0.269094	-0.269375	-0.269328	-0.269188			L	22	-0.412931	-0.40523	-0.377547	-0.382993	-0.385138	0.00192516	1	0.00173703
L	23	Sample X287	12041	11403	11091	11324	11360			L	23	0.0696726	0.0478386	0.0373426	0.0451698	0.046385			L	23	0	0	0	0	0	0	0	0
L	24	Sample X288	14111	13896	13131	13283	13346			L	24	0.144141	0.136136	0.108172	0.113665	0.11595			L	24	0	0	0	0	0	0	0	0
M	1	Sample X289	27017	29886	29572	29616	29718			M	1	0.782336	0.984508	0.96087	0.964159	0.971812			M	1	0.757488	0.983929	0.959842	0.956382	0.964942	0.0566103	0	0.0129659
M	2	Sample X290	40869	51215	51377	51952	52088			M	2	2.16872	4.79158	4.86027	5.11603	5.17941			M	2	2.4253	5.05034	5.11913	5.37505	5.43864	0.65626	1	0.188334
M	3	Sample X291	23551	25008	25126	25264	25243			M	3	0.573706	0.657212	0.664229	0.672486	0.671226			M	3	0.548858	0.656634	0.663201	0.66471	0.664357	0.0269438	0	0.00721867
M	4	Sample X292	41652	47851	47268	47881	48312			M	4	2.29233	3.62781	3.46646	3.63638	3.76251			M	4	2.54891	3.88657	3.72532	3.89539	4.02175	0.334414	0	0.0920523
M	5	Sample X293	17861	17735	17308	18023	18117			M	5	0.295024	0.289582	0.271342	0.302063	0.306169			M	5	0.270176	0.289003	0.270314	0.294287	0.299299	0.00470675	0	0.00182019
M	6	Sample X294	31145	38533	38397	40236	41513			M	6	1.08344	1.84034	1.82287	2.07408	2.26984			M	6	1.34002	2.0991	2.08173	2.3331	2.52907	0.189771	0	0.0743158
M	7	Sample X295	15476	16504	14925	15623	15719			M	7	0.19652	0.237837	0.175046	0.202327	0.206137			M	7	0.171672	0.237258	0.174017	0.19455	0.199267	0.0163967	0	0.00172473
M	8	Sample X296	27617	33600	32431	35739	37436			M	8	0.822181	1.29781	1.19194	1.51203	1.70404			M	8	1.07876	1.55657	1.45079	1.77105	1.96327	0.119453	0	0.0552821
M	9	Sample X297	12779	13784	12178	12722	12745			M	9	0.0955698	0.131991	0.0744274	0.0935445	0.0943612			M	9	0.0707217	0.131413	0.0733986	0.0857681	0.0874917	0.0151728	0	0.00104813
M	10	Sample X298	14521	16664	17016	18262	18917			M	10	0.159587	0.244419	0.259049	0.312533	0.34176			M	10	0.416162	0.503178	0.517903	0.571552	0.600992	0.0217539	0	0.0115519
M	11	Sample X299	12360	12642	11774	11949	12158			M	11	0.0807808	0.0907092	0.0604738	0.0664929	0.0737318			M	11	0.0559327	0.0901306	0.059445	0.0587165	0.0668623	0.0085495	0	0.0006831
M	12	Sample X300	7691	8725	8636	9089	9498			M	12	-0.0698783	-0.0385944	-0.0413308	-0.0273157	-0.0144722			M	12	0.186697	0.220164	0.217523	0.231704	0.24476	0.00836681	0	0.00362896
M	13	Sample X301	11637	11180	11071	11076	11146			M	13	0.0557883	0.0403247	0.0366738	0.0368409	0.0391843			M	13	0.0309401	0.0397461	0.035645	0.0290645	0.0323148	0.00220152	0	8.59209e-05
M	14	Sample X302	1045	1041	1072	1101	1149			M	14	-0.24754	-0.247637	-0.246891	-0.246193	-0.245037			M	14	0.00903477	0.011122	0.0119623	0.0128261	0.014196	0.000521808	1	0.000322574
M	15	Sample X303	11654	11816	11219	11219	11145			M	15	0.0563684	0.0619149	0.0416344	0.0416344	0.0391508			M	15	0.0315202	0.0613364	0.0406057	0.0338581	0.0322813	0.00745403	0	4.75661e-05
M	16	Sample X304	774	797	837	861	860			M	16	-0.254028	-0.25348	-0.252525	-0.251951	-0.251975			M	16	0.002547	0.00527894	0.00632866	0.00706803	0.00725732	0.000682985	1	0.000294395
M	17	Sample X305	9968	9604	9153	9018	9166			M	17	0.000514238	-0.0111137	-0.0253179	-0.0295268	-0.0249116			M	17	-0.0243339	-0.0116923	-0.0263467	-0.0373032	-0.0317811	0.00316041	0	-0.00046545
M	18	Sample X306	662	621	603	577	589			M	18	-0.256694	-0.257668	-0.258095	-0.258711	-0.258427			M	18	-0.000118818	0.00109093	0.000758659	0.000308052	0.000805711	0.000302438	1	5.77831e-05
M	19	Sample X307	11203	10976	10701	10702	10662			M	19	0.0410969	0.0335034	0.0243862	0.0244192	0.0231004			M	19	0.0162487	0.0329248	0.0233574	0.0166428	0.0162309	0.00416902	0	-1.11527e-06
M	20	Sample X308	706	674	681	661	650			M	20	-0.255648	-0.256409	-0.256242	-0.256718	-0.256979			M	20	0.000927393	0.00234976	0.00261096	0.00230145	0.00225332	0.000355591	1	8.28706e-05
M	21	Sample X309	11571	10521	10427	10413	10292			M	21	0.0535392	0.0184666	0.0153903	0.014933	0.01099			M	21	0.0286911	0.0178881	0.0143615	0.0071566	0.00412047	-0.00270075	0	-0.00153566
M	22	Sample X310	619	525	498	479	473			M	22	-0.257715	-0.259943	-0.260581	-0.26103	-0.261172			M	22	-0.00113991	-0.00118409	-0.00172796	-0.00201122	-0.0019398	-1.10437e-05	1	-4.9993e-05
M	23	Sample X311	10715	9970	9984	10193	10165			M	23	0.0248482	0.000578538	0.00102876	0.00777638	0.00686952			M	23	0	0	0	0	0	0	0	0
M	24	Sample X312	667	575	571	564	555			M	24	-0.256575	-0.258759	-0.258853	-0.259019	-0.259232			M	24	0	0	0	0	0	0	1	0
N	1	Sample X313	17844	18336	18617	18344	17773			N	1	0.294288	0.315795	0.328275	0.316149	0.29122			N	1	0.261351	0.302396	0.312918	0.299941	0.277201	0.0102612	0	0.000990619
N	2	Sample X314	16232	17777	18942	19290	19085			N	2	0.226742	0.291393	0.342891	0.358762	0.349385			N	2	0.48158	0.547493	0.59892	0.615195	0.60577	0.016478	0	0.00776186
N	3	Sample X315	13609	14461	14311	13587	13003			N	3	0.125551	0.157312	0.151645	0.124744	0.10357			N	3	0.0926136	0.143912	0.136288	0.108537	0.0895512	0.0128247	0	-0.000191401
N	4	Sample X316	15023	17163	17436	16706	15979			N	4	0.178832	0.26522	0.276777	0.246154	0.216528			N	4	0.43367	0.52132	0.532805	0.502587	0.472913	0.0219123	0	0.00245269
N	5	Sample X317	12079	12965	11993	11683	11984			N	5	0.0709891	0.102208	0.0680123	0.0573589	0.0677013			N	5	0.0380519	0.088809	0.0526547	0.0411514	0.0536823	0.0126893	0	0.000976896
N	6	Sample X318	4905	5056	5357	5346	5333			N	6	-0.148984	-0.144879	-0.136636	-0.136938	-0.137296			N	6	0.105855	0.111221	0.119393	0.119494	0.119089	0.00134161	0	0.00082716
N	7	Sample X319	11790	12341	10853	10989	11219			N	7	0.0610225	0.0801156	0.0294144	0.0339366	0.0416344			N	7	0.0280854	0.0667162	0.0140568	0.0177291	0.0276154	0.0096577	0	-2.93745e-05
N	8	Sample X320	1588	1727	1762	1548	1572			N	8	-0.234379	-0.230975	-0.230115	-0.235356	-0.23477			N	8	0.0204593	0.0251249	0.025913	0.0210765	0.021615	0.00116641	1	7.22313e-05
N	9	Sample X321	11307	11753	10415	10852	10870			N	9	0.0445965	0.0597541	0.0149983	0.0293813	0.0299785			N	9	0.0116594	0.0463547	-0.000359317	0.0131738	0.0159595	0.00867382	0	0.000268754
N	10	Sample X322	611	622	613	598	592			N	10	-0.257905	-0.257644	-0.257858	-0.258213	-0.258356			N	10	-0.00306651	-0.00154416	-0.00182908	-0.00178071	-0.00197053	0.000380588	1	6.8499e-05
N	11	Sample X323	11494	11474	10579	10931	10903			N	11	0.0509222	0.0502436	0.0203699	0.0320053	0.0310744			N	11	0.017985	0.0368442	0.0050123	0.0157979	0.0170554	0.00471479	0	-5.81021e-05
N	12	Sample X324	662	655	616	581	568			N	12	-0.256694	-0.25686	-0.257786	-0.258616	-0.258924			N	12	-0.0018556	-0.000760582	-0.00175789	-0.00218378	-0.00253941	0.000273754	1	-4.2738e-05
N	13	Sample X325	10868	10810	10835	10756	10655			N	13	0.0299121	0.0279892	0.0288176	0.0262025	0.0228698			N	13	-0.00302502	0.0145898	0.01346	0.00999501	0.00885074	0.00440371	0	0.000742235
N	14	Sample X326	785	752	711	718	715			N	14	-0.253766	-0.254553	-0.255529	-0.255362	-0.255434			N	14	0.00107253	0.00154719	0.000499576	0.00107036	0.000951416	0.000118667	1	-7.56935e-06
N	15	Sample X327	10889	10791	10185	10386	10479			N	15	0.0306093	0.0273602	0.00751719	0.0140517	0.0170908			N	15	-0.00232781	0.0139607	-0.00784043	-0.00215579	0.00307177	0.00407214	0	0.000337474
N	16	Sample X328	903	875	837	848	827			N	16	-0.250947	-0.251616	-0.252525	-0.252262	-0.252764			N	16	0.00389186	0.00448329	0.00350369	0.00417069	0.0036215	0.000147856	1	-1.68976e-05
N	17	Sample X329	11507	11025	10529	10701	10802			N	17	0.0513635	0.0351373	0.0187289	0.0243862	0.0277243			N	17	0.0184264	0.0217379	0.0033713	0.0081787	0.0137052	0.000827879	0	-0.00029507
N	18	Sample X330	705	659	615	611	611			N	18	-0.255672	-0.256765	-0.25781	-0.257905	-0.257905			N	18	-0.00083318	-0.000665549	-0.00178162	-0.00147234	-0.00151988	4.19076e-05	1	-4.29188e-05
N	19	Sample X331	10804	10518	10188	10124	10266			N	19	0.0277905	0.0183683	0.00761438	0.00554322	0.0101449			N	19	-0.00514663	0.00496889	-0.00774324	-0.0106643	-0.00387414	0.00252888	0	7.95311e-05
N	20	Sample X332	1030	966	911	934	921			N	20	-0.247901	-0.249437	-0.250755	-0.250204	-0.250516			N	20	0.0069375	0.00666256	0.00527335	0.00622838	0.00586945	-6.87361e-05	1	-6.67532e-05
N	21	Sample X333	11062	10275	10215	10143	10156			N	21	0.0363729	0.0104374	0.00848955	0.00615761	0.00657821			N	21	0.0034358	-0.00296205	-0.00686807	-0.0100499	-0.00744084	-0.00159946	0	-0.00067979
N	22	Sample X334	913	819	813	787	785			N	22	-0.250707	-0.252955	-0.253098	-0.253718	-0.253766			N	22	0.00413125	0.00314518	0.0029306	0.0027144	0.00261916	-0.000246519	1	-9.45057e-05
N	23	Sample X335	10959	10366	10426	10452	10385			N	23	0.0329372	0.0133994	0.0153576	0.0162075	0.0140191			N	23	0	0	0	0	0	0	0	0
N	24	Sample X336	740	687	690	673	675			N	24	-0.254838	-0.2561	-0.256028	-0.256433	-0.256385			N	24	0	0	0	0	0	0	1	0
O	1	Sample X337	16546	17051	16641	15680	15160			O	1	0.239561	0.260515	0.243471	0.204587	0.184149			O	1	0.208453	0.256232	0.240123	0.203462	0.183634	0.0119446	0	-0.00155117
O	2	Sample X338	17443	18599	18771	18118	16890			O	2	0.277075	0.327472	0.335176	0.306212	0.253789			O	2	0.46534	0.519942	0.528419	0.500739	0.448803	0.0136506	0	-0.00103351
O	3	Sample X339	13893	14975	13962	13057	13285			O	3	0.136024	0.176976	0.138586	0.105509	0.113737			O	3	0.104917	0.172692	0.135238	0.104384	0.113223	0.0169439	0	0.000519128
O	4	Sample X340	1437	1489	1451	1471	1435			O	4	-0.238061	-0.236795	-0.23772	-0.237233	-0.23811			O	4	-0.0497964	-0.0443244	-0.044478	-0.0427065	-0.043095	0.00136799	1	0.000418835
O	5	Sample X341	12032	12143	11649	11622	11619			O	5	0.0693611	0.0732104	0.0561977	0.0552766	0.0551744			O	5	0.0382534	0.068927	0.05285	0.0541514	0.0546601	0.0076684	0	0.00102542
O	6	Sample X342	1298	1382	1442	1388	1369			O	6	-0.241435	-0.239398	-0.237939	-0.239252	-0.239714			O	6	-0.0531706	-0.0469273	-0.044697	-0.0447251	-0.0446989	0.00156084	1	0.000529486
O	7	Sample X343	10757	10969	10163	10254	10323			O	7	0.0262355	0.0332702	0.00680478	0.00975515	0.0119986			O	7	-0.00487214	0.0289868	0.00345707	0.00862988	0.0114843	0.00846473	0	0.00102228
O	8	Sample X344	1634	1611	1499	1458	1473			O	8	-0.233254	-0.233817	-0.236551	-0.23755	-0.237185			O	8	-0.0449895	-0.0413463	-0.043309	-0.043023	-0.0421701	0.000910815	1	0.000176214
O	9	Sample X345	11527	11450	11208	11148	11158			O	9	0.0520429	0.04943	0.0412648	0.0392514	0.0395867			O	9	0.0209352	0.0451466	0.0379171	0.0381261	0.0390724	0.00605284	0	0.00113358
O	10	Sample X346	1071	1005	956	953	927			O	10	-0.246915	-0.248501	-0.249677	-0.249749	-0.250372			O	10	-0.0586506	-0.0560308	-0.0564346	-0.0552219	-0.0553573	0.000654938	1	0.00020583
O	11	Sample X347	11471	11047	10803	10920	10861			O	11	0.0501419	0.0358718	0.0277574	0.0316395	0.0296798			O	11	0.0190342	0.0315884	0.0244097	0.0305142	0.0291656	0.00313856	0	0.000633214
O	12	Sample X348	714	667	682	662	646			O	12	-0.255457	-0.256575	-0.256219	-0.256694	-0.257074			O	12	-0.0671928	-0.0641046	-0.0629763	-0.062167	-0.0620595	0.000772049	1	0.000320833
O	13	Sample X349	11153	10858	10762	10748	10754			O	13	0.039419	0.0295803	0.0264008	0.0259381	0.0261364			O	13	0.00831133	0.0252969	0.0230531	0.0248128	0.0256221	0.0042464	0	0.00108192
O	14	Sample X350	1351	1293	1270	1233	1235			O	14	-0.24015	-0.241556	-0.242113	-0.243008	-0.24296			O	14	-0.0518857	-0.0490858	-0.0488709	-0.0484813	-0.0479453	0.000699984	1	0.000246278
O	15	Sample X351	11209	11176	10737	10878	10853			O	15	0.0412984	0.0401905	0.0255746	0.0302441	0.0294144			O	15	0.0101908	0.0359071	0.0222269	0.0291188	0.0289002	0.00642908	0	0.00116934
O	16	Sample X352	753	687	703	689	664			O	16	-0.254529	-0.2561	-0.255719	-0.256052	-0.256647			O	16	-0.0662641	-0.0636292	-0.0624769	-0.0615252	-0.0616319	0.000658734	1	0.000289515
O	17	Sample X353	11371	10549	10644	10563	10529			O	17	0.0467567	0.019385	0.0225076	0.0198445	0.0187289			O	17	0.015649	0.0151016	0.0191598	0.0187192	0.0182147	-0.000136854	0	0.000160355
O	18	Sample X354	596	482	524	482	480			O	18	-0.258261	-0.26096	-0.259966	-0.26096	-0.261007			O	18	-0.0699961	-0.068489	-0.066724	-0.0664326	-0.0659922	0.000376783	1	0.000250245
O	19	Sample X355	10936	10331	10359	10279	10238			O	19	0.0321717	0.012259	0.0131712	0.0105674	0.00923572			O	19	0.00106399	0.00797564	0.00982351	0.00944209	0.00872148	0.00172791	0	0.000478593
O	20	Sample X356	577	519	519	486	498			O	20	-0.258711	-0.260085	-0.260085	-0.260865	-0.260581			O	20	-0.0704466	-0.0676141	-0.0668423	-0.066338	-0.0655667	0.000708125	1	0.000304991
O	21	Sample X357	10810	10127	10167	10206	10184			O	21	0.0279892	0.0056402	0.00693426	0.00819773	0.00748479			O	21	-0.00311846	0.00135681	0.00358655	0.00707246	0.00697056	0.00111882	0	0.000630563
O	22	Sample X358	632	551	511	498	500			O	22	-0.257407	-0.259327	-0.260274	-0.260581	-0.260534			O	22	-0.0691419	-0.0668566	-0.0670316	-0.0660543	-0.0655194	0.000571335	1	0.000226407
O	23	Sample X359	10904	10085	10056	9987	9968			O	23	0.0311077	0.00428339	0.00334771	0.00112527	0.000514238			O	23	0	0	0	0	0	0	0	0
O	24	Sample X360	3422	3259	3229	3179	3160			O	24	-0.188265	-0.192471	-0.193242	-0.194527	-0.195015			O	24	0	0	0	0	0	0	1	0
P	1	Sample X361	46126	47175	46582	46200	45953		45953			46407.2	53637.4
P	2	Sample X362	54212	54052	53608	53328	52987
P	3	Sample X363	38650	38812	39181	39524	39760		39760			39185.4	14237
P	4	Sample X364	13747	13918	14363	14574	14583
P	5	Sample X365	28488	29783	29718	29494	29374		29374			29371.4	721.8
P	6	Sample X366	782	779	684	670	694
P	7	Sample X367	19873	20807	20785	20859	20826		20826			20630	632.8
P	8	Sample X368	633	634	645	632	620
P	9	Sample X369	12686	13097	13211	13015	12905		12905			12982.8	1718.8
P	10	Sample X370	1593	1808	1766	1758	1669
P	11	Sample X371	12713	13685	13789	13582	13467		13467			13447.2	1875
P	12	Sample X372	2252	1756	1795	1789	1783
P	13	Sample X373	8855	9014	9153	9319	9220		9220			9112.2	566
P	14	Sample X374	559	515	561	605	590
P	15	Sample X375	9589	9745	9578	9492	9475		9475			9575.8	900
P	16	Sample X376	964	894	927	871	844
P	17	Sample X377	7253	7132	6933	6827	6669
P	18	Sample X378	369	357	356	355	362
P	19	Sample X379	6930	6751	6649	6501	6407
P	20	Sample X380	335	325	328	328	321
P	21	Sample X381	7892	7596	7919	7381	7276
P	22	Sample X382	118	115	118	119	119
P	23	Sample X383	7463	7311	7081	7017	6791
P	24	Sample X384	66	62	63	61	64
[truncated: 12 more columns]

## Sheet: Sheet1
8	50382	48167	46407		40194	36493	36831
4	43469	40811	39185		33281	29137	29609
2	31326	31190	29371		21138	19516	19795
1	22069	21267	20630		11881	9593	11054
0.5	14915	15342	12983		4727	3668	3407
0.25	15747	16405	13447		5559	4731	3871
0.13	11103	11114	9112		915	-560	-464
0	10188	11674	9576		0	0	0
