# Supplementary material for: PDZ-directed substrate recruitment is the primary determinant of specific 4E-BP1 dephosphorylation by PP1-Neurabin
Source: eLife journal article supplement (doi:10.7554/elife.103403), 2024-11-20
Supplement: fig5-data1 [file replicate1.xlsx]

## Sheet: All Cycles
Well Row	Well Col	Content	Raw Data (425-10/460-20)	Raw Data (425-10/460-20)	Raw Data (425-10/460-20)				convert to phosphate	Well Row	Well Col	Raw Data (425-10/460-20)	Raw Data (425-10/460-20)	Raw Data (425-10/460-20)				normalize to the lasst column	Well Row	Well Col	Raw Data (425-10/460-20)	Raw Data (425-10/460-20)	Raw Data (425-10/460-20)								PP1-Neb 0.25 nM																PP1-Ph3 3 nM
		Time [s]	0	240	480							0	4	8							0	4	8								4ebp-pdz	4ebp-sgs	irsp53-pdz	irsp53-sgs	L5A-PDZ	L5A-SGS	V1	V2	V3	V4	V5	V6	V7	V8			4ebp-pdz	4ebp-sgs	irsp53-pdz
A	1	Sample X1	25380	38993	45303				0.67947	A	1	1.11063	3.4504	6.00514					A	1	0.341716	2.93719	5.43381		0.624155	0.636512	0			600	0.636512	0.0883195	0.20682	0.232283	0.188619	0.0503602	0.0808836	0.564187	0.21374	0.164693	0.260472	0.279583	0.383132	0.160383			0.770098	0.0487448	0.110904
A	2	Sample X2	21172	39016	45791					A	2	0.719326	3.45692	6.29724					A	2	-0.319745	2.76871	5.84104		0.768082	0.770098	0			300	0.882464	0.0702707	0.510915	0.481147	0.722809	0.125507	0.122851	0.916438	0.316537	0.288808	0.385723	1.39965	0.440933	0.135006			0.793264	0.0300702	0.287483
A	3	Sample X3	24670	38459	47981					A	3	1.03807	3.30289	7.9002					A	3	0.269156	2.78968	7.32887		1.1348	0.882464	0			150	1.11958	0.0931864	0.773766	0.37235	0.718169	0.228745	0.144661	0.974182	0.493743	0.351288	0.539378	1.60583	0.763182	0.267107			0.379725	0.0242536	0.356081
A	4	Sample X4	21947	38602	46185					A	4	0.784892	3.34167	6.54814					A	4	-0.254179	2.65346	6.09194		0.859618	0.793264	0			75	0.972577	0.0664469	0.952196	0.1849	1.54941	0.072537	0.178291	1.71512	0.451658	0.314069	0.410942	1.52067	0.3152	0.201147			0.194987	0.0103351	0.42187
A	5	Sample X5	24886	41229	49853					A	5	1.05983	4.15921	9.81891					A	5	0.29092	3.646	9.24758		1.4004	1.11958	0			37.5	1.08995	0.0552097	2.19705	0.147954	1.65355	0.0671231	0.200989	1.4333	0.491133	0.29522	0.461364	2.19517	0.709705	0.3116			0.148297	-0.0068636	0.674536
A	6	Sample X6	18055	30313	37001					A	6	0.480093	1.7106	2.93502					A	6	-0.558978	1.02239	2.47882		0.364107	0.379725	0			18.75	0.548503	0.0323067	1.88062	0.0554553	1.41895	0.018757	0.182435	0.662266	0.345922	0.17614	0.336904	2.09325	0.613844	0.142288			0.109474	-0.0204383	0.5572
A	7	Sample X7	25313	41037	48826					A	7	1.10366	4.09178	8.68668					A	7	0.334742	3.57857	8.11535		1.1342	0.972577	0			9.375	0.44531	0.0142278	1.05066	0.0319119	0.683049	0.00624232	0.159226	0.861432	0.248537	0.144307	0.305416	1.11987	0.523566	0.198278			0.0667428	-0.012126	0.438746
A	8	Sample X8	21039	25799	30134					A	8	0.708337	1.15486	1.68536					A	8	-0.330735	0.466658	1.22916		0.190626	0.194987	0			4.6875	0.266485	0.0137985	0.689684	0.0190743	0.42007	0.00261619	0.118683	0.486955	0.180799	0.123269	0.215009	0.581826	0.331292	0.110421			0.0670358	0.00382424	0.341112
A	9	Sample X9	25434	41456	49702					A	9	1.11627	4.24072	9.63828					A	9	0.347356	3.72751	9.06695		1.33486	1.08995	0			2.34375	0.126	0.0159731	0.383802	0.0107998	0.229101	0.00137141	0.0956329	0.235747	0.11576	0.0799319	0.0954684	0.307153	0.210016	0.0887857			0.0804281	0.00191182	0.207459
A	10	Sample X10	16447	20910	24014					A	10	0.370066	0.697749	0.973573					A	10	-0.669005	0.0095426	0.517372		0.126957	0.148297	0			1.17188	0.0742934	0.0176102	0.203285	0.0169784	0.117336	-0.00371583	0.081224	0.067716	0.0662431	0.0774473	0.0562335	0.177533	0.123847	0.0437363			0.081381	-0.00147716	0.100295
A	11	Sample X11	24836	36741	43861					A	11	1.05477	2.87426	5.24521					A	11	0.285858	2.36105	4.67388		0.578208	0.548503	0			0.585938	0.0147492	0.00144482	0.0737625	0.0217677	0.0480104	-0.00355336	0.0438269	0.0760992	0.0443027	0.0181942	0.0207275	0.078711	0.0677017	0.033156			0.0761741	-0.000650952	0.0450609
A	12	Sample X12	20608	20530	23937					A	12	0.673233	0.666962	0.966156					A	12	-0.365838	-0.0212439	0.509956		0.1328	0.109474	0			0	0	0	0	0	0	0	0	0	0	0	0	0	0	0			0	0	0
A	13	Sample X13	23159	33780	41503					A	13	0.892959	2.26735	4.25785					A	13	0.124045	1.75414	3.68652		0.483095	0.44531	0
A	14	Sample X14	17470	17472	16750					A	14	0.439102	0.43924	0.390173					A	14	-0.59997	-0.248966	-0.0660275		0.0457347	0.0667428	0				3	27	51	75	99	123	147	171	195	219	243	267	291	315	339		3	27	51
A	15	Sample X15	20796	28602	35599					A	15	0.68845	1.48115	2.62274					A	15	-0.0804638	0.967935	2.05141		0.270869	0.266485	0				PP1-Neb 0.25 nM																PP1-Ph3 3 nM
A	16	Sample X16	18624	17112	17976					A	16	0.521075	0.414568	0.474491					A	16	-0.517996	-0.273638	0.0182898		0.072982	0.0670358	0				4ebp-pdz	4ebp-sgs	irsp53-pdz	irsp53-sgs	L5A-PDZ	L5A-SGS	V1	V2	V3	V4	V5	V6	V7	V8			4ebp-pdz	4ebp-sgs	irsp53-pdz
A	17	Sample X17	20250	23688	28395					A	17	0.644654	0.942388	1.45507					A	17	-0.12426	0.429178	0.883742		0.113641	0.126	0		0	600		0.0883195		0.232283		0.0503602	0.0808836	0.564187	0.21374	0.164693	0.260472	0.279583	0.383132	0.160383			0.770098	0.0487448	0.110904
A	18	Sample X18	18420	18400	19241					A	18	0.506253	0.504808	0.566807					A	18	-0.532818	-0.183398	0.110606		0.0735012	0.0804281	0		2	300		0.0702707		0.481147	0.722809	0.125507	0.122851	0.916438	0.316537	0.288808	0.385723	na	0.440933	0.135006			0.793264	0.0300702	0.287483
A	19	Sample X19	19195	21668	23874					A	19	0.56335	0.760983	0.960112					A	19	-0.205564	0.247773	0.388783		0.0352526	0.0742934	0		4	150	1.11958	0.0931864		0.37235	0.718169	0.228745	0.144661	0.974182	0.493743	0.351288	0.539378	na	0.763182	0.267107			0.379725	0.0242536	0.356081
A	20	Sample X20	20838	20957	21657					A	20	0.69187	0.701598	0.760047					A	20	-0.347202	0.0133921	0.303847		0.0726136	0.081381	0		6	75	0.972577	0.0664469	0.952196	0.1849	na	0.072537	0.178291	na	0.451658	0.314069	0.410942	na	0.3152	0.201147			0.194987	0.0103351	0.42187
A	21	Sample X21	22325	19538	21399					A	21	0.81785	0.589318	0.738258					A	21	0.0489361	0.0761085	0.16693		0.0227053	0.0147492	0		8	37.5	1.08995	0.0552097	na	0.147954	na	0.0671231	0.200989	1.4333	0.491133	0.29522	0.461364	na	0.709705	0.3116			0.148297	-0.0068636	0.674536
A	22	Sample X22	20639	21721	20965					A	22	0.675732	0.765498	0.702254					A	22	-0.363339	0.0772919	0.246053		0.0421904	0.0761741	0		10	18.75	0.548503	0.0323067	na	0.0554553	na	0.018757	0.182435	0.662266	0.345922	0.17614	0.336904	na	0.613844	0.142288			0.109474	-0.0204383	0.5572
A	23	Sample X23	21761	18516	19301					A	23	0.768914	0.51321	0.571329					A	23	0	0	0		0	0	0		12	9.375	0.44531	0.0142278	1.05066	0.0319119	0.683049	0.00624232	0.159226	0.861432	0.248537	0.144307	0.305416	na	0.523566	0.198278			0.0667428	-0.012126	0.438746
A	24	Sample X24	24680	20793	17716					A	24	1.03907	0.688206	0.456201					A	24	0	0	0		0	0	0		14	4.6875	0.266485	0.0137985	0.689684	0.0190743	0.42007	0.00261619	0.118683	0.486955	0.180799	0.123269	0.215009	0.581826	0.331292	0.110421			0.0670358	0.00382424	0.341112
B	1	Sample X25	19084	22982	24789					B	1	0.55504	0.876736	1.05003					B	1	0.131268	0.532077	0.837824		0.0764369	0.0883195	0		16	2.34375	0.126	0.0159731	0.383802	0.0107998	0.229101	0.00137141	0.0956329	0.235747	0.11576	0.0799319	0.0954684	0.307153	0.210016	0.0887857			0.0804281	0.00191182	0.207459
B	2	Sample X26	13709	16443	18566					B	2	0.200309	0.369803	0.516846					B	2	-0.0473666	0.0777545	0.342592		0.0662093	0.0487448	0		18	1.17188	0.0742934	0.0176102	0.203285	0.0169784	0.117336	-0.00371583	0.081224	0.067716	0.0662431	0.0774473	0.0562335	0.177533	0.123847	0.0437363			0.081381	-0.00147716	0.100295
B	3	Sample X27	17142	21427	21741					B	3	0.416608	0.740609	0.767205					B	3	-0.0071631	0.39595	0.555002		0.0397631	0.0702707	0		20	0.585938	0.0147492	0.00144482	0.0737625	0.0217677	0.0480104	-0.00355336	0.0438269	0.0760992	0.0443027	0.0181942	0.0207275	0.078711	0.0677017	0.033156			0.0761741	-0.000650952	0.0450609
B	4	Sample X28	15291	16771	17813					B	4	0.295858	0.391577	0.462998					B	4	0.0481822	0.0995292	0.288744		0.0473036	0.0300702	0		22	0	0	0	0	0	0	0	0	0	0	0	0	0	0	0			0	0	0
B	5	Sample X29	15017	20306	22267					B	5	0.278828	0.649091	0.81275					B	5	-0.144944	0.304432	0.600547		0.0740289	0.0931864	0
B	6	Sample X30	12999	15171	15038					B	6	0.159518	0.288374	0.280125					B	6	-0.0881576	-0.00367465	0.105871		0.0273864	0.0242536	0
B	7	Sample X31	15382	18622	19956					B	7	0.30156	0.520929	0.621566					B	7	-0.122212	0.17627	0.409364		0.0582734	0.0664469	0
B	8	Sample X32	13738	14872	13896					B	8	0.202002	0.269899	0.211261					B	8	-0.0456738	-0.0221493	0.0370071		0.0147891	0.0103351	0
B	9	Sample X33	13908	16778	17513					B	9	0.211967	0.392046	0.442076					B	9	-0.211804	0.0473868	0.229874		0.0456217	0.0552097	0
B	10	Sample X34	16338	14252	14289					B	10	0.362901	0.23236	0.234572					B	10	0.115226	-0.0596884	0.0603171		0.0300014	-0.0068636	0
B	11	Sample X35	15333	14731	16069					B	11	0.298487	0.261272	0.345371					B	11	-0.125285	-0.0833874	0.133168		0.0541389	0.0323067	0
B	12	Sample X36	17503	16542	13780					B	12	0.441384	0.37634	0.204457					B	12	0.193709	0.0842921	0.0302025		-0.0135224	-0.0204383	0
B	13	Sample X37	15314	13877	13696					B	13	0.297297	0.210145	0.199551					B	13	-0.126475	-0.134514	-0.0126519		0.0304656	0.0142278	0
B	14	Sample X38	15159	14091	12239					B	14	0.287627	0.222778	0.117198					B	14	0.0399519	-0.0692706	-0.0570563		0.00305357	-0.012126	0
B	15	Sample X39	15340	13668	13665					B	15	0.298925	0.197919	0.197745					B	15	-0.124846	-0.14674	-0.0144581		0.0330704	0.0137985	0
B	16	Sample X40	13311	13320	12552					B	16	0.17729	0.177806	0.134463					B	16	-0.0703853	-0.114242	-0.0397914		0.0186126	0.00382424	0
B	17	Sample X41	14567	14023	13140					B	17	0.251304	0.218751	0.16752					B	17	-0.172467	-0.125908	-0.0446825		0.0203064	0.0159731	0
B	18	Sample X42	14649	14524	13672					B	18	0.256279	0.248703	0.198152					B	18	0.00860334	-0.0433456	0.0238979		0.0168109	0.00191182	0
B	19	Sample X43	15629	14150	14487					B	19	0.317155	0.226281	0.246468					B	19	-0.106616	-0.118378	0.0342653		0.0381607	0.0176102	0
B	20	Sample X44	14422	14164	12960					B	20	0.242551	0.227114	0.157313					B	20	-0.00512424	-0.0649342	-0.0169415		0.0119982	-0.00147716	0
B	21	Sample X45	17355	15126	14232					B	21	0.431176	0.285577	0.231166					B	21	0.00740456	-0.0590815	0.0189631		0.0195112	0.00144482	0
B	22	Sample X46	17025	17815	15831					B	22	0.408668	0.463139	0.330039					B	22	0.160992	0.17109	0.155785		-0.00382639	-0.000650952	0
B	23	Sample X47	17247	16058	13912					B	23	0.423771	0.344659	0.212203					B	23	0	0	0		0	0	0
B	24	Sample X48	14507	15230	13258					B	24	0.247675	0.292048	0.174254					B	24	0	0	0		0	0	0
C	1	Sample X49	43049	46130	45945					C	1	4.8742	6.51226	6.39363					C	1	4.5318	6.24714	6.18636		-0.0151933	0.20682	0
C	2	Sample X50	36482	39347	39710					C	2	2.81508	3.55239	3.66067					C	2	2.48792	3.30857	3.37515		0.0166452	0.110904	0
C	3	Sample X51	42736	49676	48832					C	3	4.7405	9.60771	8.69269					C	3	4.39811	9.34259	8.48542		-0.214291	0.510915	0
C	4	Sample X52	35170	41931	42859					C	4	2.53423	4.41793	4.79246					C	4	2.20707	4.17411	4.50694		0.0832078	0.287483	0
C	5	Sample X53	38586	49705	49489					C	5	3.3373	9.64182	9.3923					C	5	2.99491	9.3767	9.18503		-0.0479155	0.773766	0
C	6	Sample X54	30931	40640	42412					C	6	1.80011	3.95661	4.60712					C	6	1.47295	3.7128	4.3216		0.152202	0.356081	0
C	7	Sample X55	38274	50923	50556					C	7	3.25348	11.2711	10.7359					C	7	2.91108	11.006	10.5286		-0.119325	0.952196	0
C	8	Sample X56	27870	41352	42696					C	8	1.39045	4.20313	4.72376					C	8	1.06329	3.95932	4.43825		0.119733	0.42187	0
C	9	Sample X57	35202	52463	54440					C	9	2.54073	14.0848	19.982					C	9	2.19833	13.8197	19.7747		1.48875	2.19705	1
C	10	Sample X58	27407	40248	46398					C	10	1.33518	3.82847	6.68983					C	10	1.00802	3.58466	6.40431		0.704913	0.674536	0
C	11	Sample X59	33323	49068	53621					C	11	2.18568	8.93432	17.0955					C	11	1.84329	8.6692	16.8883		2.05477	1.88062	1
C	12	Sample X60	26109	38911	44576					C	12	1.18829	3.42726	5.60425					C	12	0.861136	3.18345	5.31874		0.533823	0.5572	0
C	13	Sample X61	29375	45490	49880					C	13	1.58163	6.11475	9.85178					C	13	1.23924	5.84963	9.64451		0.94872	1.05066	0
C	14	Sample X62	21082	34272	41288					C	14	0.711881	2.35852	4.18021					C	14	0.384723	2.1147	3.89469		0.444996	0.438746	0
C	15	Sample X63	26765	41619	46329					C	15	1.2611	4.3005	6.64344					C	15	0.9187	4.03538	6.43617		0.600198	0.689684	0
C	16	Sample X64	23839	30404	39655					C	16	0.956763	1.72354	3.64402					C	16	0.629604	1.47973	3.3585		0.469693	0.341112	0
C	17	Sample X65	22104	33710	39948					C	17	0.798501	2.25466	3.73379					C	17	0.456106	1.98954	3.52652		0.384246	0.383802	0
C	18	Sample X66	17553	26518	32605					C	18	0.444849	1.23335	2.06288					C	18	0.11769	0.989534	1.77736		0.196957	0.207459	0
C	19	Sample X67	19412	28325	32653					C	19	0.579728	1.44633	2.07089					C	19	0.237333	1.18121	1.86362		0.170602	0.203285	0
C	20	Sample X68	16062	20523	25332					C	20	0.344918	0.666401	1.10563					C	20	0.017759	0.422585	0.820115		0.0993825	0.100295	0
C	21	Sample X69	19347	23226	24587					C	21	0.574804	0.899141	1.02978					C	21	0.232409	0.634021	0.822509		0.0471219	0.0737625	0
C	22	Sample X70	15859	19010	20326					C	22	0.331834	0.549524	0.650678					C	22	0.00467553	0.305709	0.365163		0.0148635	0.0450609	0
C	23	Sample X71	16023	14794	13828					C	23	0.342395	0.26512	0.207268					C	23	0	0	0		0	0	0
C	24	Sample X72	15786	14443	15125					C	24	0.327159	0.243815	0.285515					C	24	0	0	0		0	0	0
D	1	Sample X73	35396	40663	41494					D	1	2.58047	3.96429	4.25457					D	1	2.20836	3.73307	4.06663		0.0833899	0.232283	0
D	2	Sample X74	33863	40555	42339					D	2	2.28249	3.92839	4.57774					D	2	2.07241	3.73639	4.39055		0.163539	0.289768	0
D	3	Sample X75	33976	41555	45239					D	3	2.30326	4.2769	5.96826					D	3	1.93115	4.04568	5.78032		0.43366	0.481147	0
D	4	Sample X76	34666	43897	45995					D	4	2.43408	5.26253	6.42538					D	4	2.22399	5.07054	6.23819		0.291915	0.501775	0
D	5	Sample X77	28885	38622	41650					D	5	1.51735	3.34713	4.31199					D	5	1.14524	3.11591	4.12405		0.252035	0.37235	0
D	6	Sample X78	30744	44254	45587					D	6	1.77263	5.43852	6.17273					D	6	1.56254	5.24653	5.98554		0.184751	0.552874	0
D	7	Sample X79	24762	32943	34186					D	7	1.04731	2.11988	2.34233					D	7	0.675196	1.88865	2.15439		0.0664354	0.1849	0
D	8	Sample X80	31044	46550	47550					D	8	1.81689	6.79368	7.54016					D	8	1.60681	6.60169	7.35297		0.187821	0.71827	0
D	9	Sample X81	21011	27862	30277					D	9	0.706032	1.38948	1.7055					D	9	0.333922	1.15825	1.51756		0.0898264	0.147954	0
D	10	Sample X82	26308	41948	46187					D	10	1.21008	4.42444	6.54945					D	10	0.999994	4.23245	6.36226		0.532452	0.670283	0
D	11	Sample X83	19754	22473	22857					D	11	0.605899	0.830935	0.865372					D	11	0.233788	0.59971	0.677431		0.0194303	0.0554553	0
D	12	Sample X84	24492	40666	42802					D	12	1.02033	3.96529	4.76829					D	12	0.810248	3.7733	4.5811		0.201949	0.471356	0
D	13	Sample X85	16347	17423	17405					D	13	0.363492	0.435857	0.434617					D	13	-0.00861903	0.204632	0.246676		0.010511	0.0319119	0
D	14	Sample X86	22637	38455	43571					D	14	0.845556	3.30181	5.1085					D	14	0.63547	3.10982	4.92131		0.452873	0.53573	0
D	15	Sample X87	16157	15521	15666					D	15	0.351082	0.310315	0.319506					D	15	-0.0210284	0.0790894	0.131566		0.0131191	0.0190743	0
D	16	Sample X88	19685	33026	37798					D	16	0.600583	2.13409	3.13012					D	16	0.390497	1.9421	2.94293		0.250209	0.319055	0
D	17	Sample X89	15592	15224	13994					D	17	0.314808	0.291674	0.217037					D	17	-0.0573025	0.0604486	0.0290961		-0.00783812	0.0107998	0
D	18	Sample X90	16786	27053	32583					D	18	0.392581	1.29397	2.05922					D	18	0.182495	1.10198	1.87203		0.192512	0.211191	0
D	19	Sample X91	14472	14311	13656					D	19	0.245563	0.235888	0.197221					D	19	-0.126547	0.00466273	0.00927996		0.00115431	0.0169784	0
D	20	Sample X92	16370	22857	26365					D	20	0.365001	0.865372	1.21637					D	20	0.154915	0.673379	1.02918		0.0889496	0.109283	0
D	21	Sample X93	14053	13743	13883					D	21	0.220526	0.202294	0.210497					D	21	-0.151585	-0.0289318	0.0225564		0.0128721	0.0217677	0
D	22	Sample X94	15478	18995	20403					D	22	0.307601	0.548409	0.656805					D	22	0.0975149	0.356416	0.469615		0.0282998	0.0465125	0
D	23	Sample X95	16478	14233	13496					D	23	0.372111	0.231226	0.187941					D	23	0	0	0		0	0	0
D	24	Sample X96	13876	13566	13483					D	24	0.210086	0.191993	0.18719					D	24	0	0	0		0	0	0
E	1	Sample X97	40424	43449	44063					E	1	3.88537	5.05241	5.34338					E	1	3.60333	4.82238	5.11228		0.072474	0.188619	0
E	2	Sample X98	38087	43030	43509					E	2	3.20438	4.86594	5.07989					E	2	2.93011	4.69511	4.94565		0.0626343	0.251942	0
E	3	Sample X99	42416	47530	50265					E	3	4.60874	7.52406	10.3403					E	3	4.32669	7.29403	10.1092		0.703784	0.722809	0
E	4	Sample X100	37239	46054	48480					E	4	2.99185	6.46314	8.35069					E	4	2.71759	6.29232	8.21645		0.481034	0.687358	0
E	5	Sample X101	37664	47917	48929					E	5	3.09635	7.84511	8.79076					E	5	2.8143	7.61508	8.55965		0.236143	0.718169	0
E	6	Sample X102	32116	43506	45670					E	6	1.98286	5.07851	6.22296					E	6	1.70859	4.90769	6.08872		0.295258	0.547516	0
E	7	Sample X103	36596	49788	52932					E	7	2.84097	9.7405	15.1853					E	7	2.55892	9.51047	14.9542		1.36094	1.54941	1
E	8	Sample X104	29559	41880	44886					E	8	1.6063	4.39845	5.77048					E	8	1.33204	4.22763	5.63624		0.352152	0.538025	0
E	9	Sample X105	34836	50995	53111					E	9	2.46741	11.3812	15.6449					E	9	2.18537	11.1511	15.4138		1.06565	1.65355	1
E	10	Sample X106	26036	37038	43271					E	10	1.18037	2.94378	4.97205					E	10	0.906104	2.77295	4.83781		0.516216	0.491464	0
E	11	Sample X107	32346	47160	52099					E	11	2.02014	7.2352	13.3208					E	11	1.7381	7.00517	13.0897		1.52113	1.41895	1
E	12	Sample X108	18776	27872	33371					E	12	0.532214	1.39069	2.19413					E	12	0.257951	1.21986	2.05989		0.210007	0.225242	0
E	13	Sample X109	29476	42876	46854					E	13	1.59514	4.7997	7.0086					E	13	1.31309	4.56966	6.77749		0.551956	0.683049	0
E	14	Sample X110	16191	21786	24570					E	14	0.353295	0.771052	1.02808					E	14	0.0790313	0.600226	0.893843		0.073404	0.101851	0
E	15	Sample X111	28010	39474	42680					E	15	1.40747	3.58984	4.71709					E	15	1.12543	3.3598	4.48598		0.281545	0.42007	0
E	16	Sample X112	16197	16982	19545					E	16	0.353686	0.40576	0.589853					E	16	0.0794221	0.234934	0.455612		0.0551694	0.0470237	0
E	17	Sample X113	20838	30848	34868					E	17	0.69187	1.78787	2.47374					E	17	0.409826	1.55784	2.24263		0.171199	0.229101	0
E	18	Sample X114	13569	17800	15526					E	18	0.192167	0.462085	0.310631					E	18	-0.0820968	0.291259	0.17639		-0.0287173	0.0323109	0
E	19	Sample X115	19178	24359	28353					E	19	0.562074	1.0072	1.44982					E	19	0.280031	0.777164	1.21872		0.110388	0.117336	0
E	20	Sample X116	14160	14584	14383					E	20	0.226876	0.252334	0.240207					E	20	-0.0473876	0.0815079	0.105966		0.00611441	0.0191692	0
E	21	Sample X117	17222	20253	21600					E	21	0.422063	0.644891	0.755208					E	21	0.140019	0.414859	0.524102		0.0273108	0.0480104	0
E	22	Sample X118	14474	13671	13200					E	22	0.245684	0.198094	0.17094					E	22	-0.0285799	0.027268	0.0366993		0.00235781	0.0081599	0
E	23	Sample X119	15069	14213	14231					E	23	0.282044	0.230033	0.231106					E	23	0	0	0		0	0	0
E	24	Sample X120	14943	13198	12548					E	24	0.274264	0.170826	0.134241					E	24	0	0	0		0	0	0
F	1	Sample X121	32214	33364	34111					F	1	1.99867	2.1929	2.32831					F	1	1.82716	2.1195	2.23004		0.0276338	0.0503602	0
F	2	Sample X122	35043	38949	38410					F	2	2.50861	3.43796	3.28972					F	2	2.15154	3.18381	3.11843		-0.016343	0.120862	0
F	3	Sample X123	29050	32550	34847					F	3	1.53877	2.05373	2.46959					F	3	1.36726	1.98034	2.37132		0.0977447	0.125507	0
F	4	Sample X124	35346	41785	43142					F	4	2.57017	4.36248	4.91488					F	4	2.21309	4.10832	4.74359		0.158818	0.316313	0
F	5	Sample X125	27553	32468	37715					F	5	1.35244	2.04017	3.10915					F	5	1.18093	1.96678	3.01089		0.261027	0.228745	0
F	6	Sample X126	33721	42273	44502					F	6	2.25665	4.55139	5.56556					F	6	1.89957	4.29724	5.39427		0.274259	0.436838	0
F	7	Sample X127	22444	26522	27409					F	7	0.828363	1.2338	1.33541					F	7	0.656852	1.1604	1.23715		0.0191865	0.072537	0
F	8	Sample X128	26776	38707	40498					F	8	1.26234	3.37047	3.9096					F	8	0.905263	3.11632	3.73832		0.155499	0.354132	0
F	9	Sample X129	19612	23221	24875					F	9	0.594979	0.898679	1.05872					F	9	0.423468	0.825285	0.960452		0.0337918	0.0671231	0
F	10	Sample X130	22092	32790	35937					F	10	0.797457	2.0939	2.6947					F	10	0.440379	1.83975	2.52341		0.170917	0.260379	0
F	11	Sample X131	17058	18310	18162					F	11	0.410903	0.498321	0.487715					F	11	0.239392	0.424928	0.389448		-0.00886992	0.018757	0
F	12	Sample X132	18364	25583	29373					F	12	0.50221	1.13193	1.58137					F	12	0.145132	0.877773	1.41008		0.133078	0.158119	0
F	13	Sample X133	15518	15068	15146					F	13	0.310125	0.281982	0.286819					F	13	0.138614	0.208588	0.188553		-0.00500887	0.00624232	0
F	14	Sample X134	15240	19692	22240					F	14	0.292672	0.601121	0.810381					F	14	-0.0644055	0.346968	0.639099		0.0730327	0.087938	0
F	15	Sample X135	13398	13666	12471					F	15	0.182288	0.197803	0.129973					F	15	0.0107773	0.12441	0.0317068		-0.0231757	0.00261619	0
F	16	Sample X136	13347	15719	16701					F	16	0.179356	0.322881	0.386903					F	16	-0.177721	0.0687279	0.21562		0.036723	0.0491677	0
F	17	Sample X137	13080	12811	11957					F	17	0.164109	0.148922	0.101836					F	17	-0.00740188	0.0755292	0.00356942		-0.01799	0.00137141	0
F	18	Sample X138	15001	12941	13924					F	18	0.27784	0.15624	0.212909					F	18	-0.079238	-0.0979132	0.0416265		0.0348849	0.0151081	0
F	19	Sample X139	13885	13245	12064					F	19	0.210615	0.173511	0.107644					F	19	0.0391038	0.100118	0.00937709		-0.0226851	-0.00371583	0
F	20	Sample X140	12150	12620	12120					F	20	0.11233	0.138244	0.110693					F	20	-0.244747	-0.115909	-0.0605892		0.01383	0.0230198	0
F	21	Sample X141	13548	12171	11724					F	21	0.19095	0.113477	0.0892783					F	21	0.0194388	0.040084	-0.00898812		-0.012268	-0.00355336	0
F	22	Sample X142	12616	12515	16282					F	22	0.138021	0.13241	0.359234					F	22	-0.219056	-0.121743	0.187952		0.0774236	0.050876	0
F	23	Sample X143	13210	11426	11891					F	23	0.171511	0.0733932	0.0982664					F	23	0	0	0		0	0	0
F	24	Sample X144	16249	14614	13206					F	24	0.357078	0.254153	0.171283					F	24	0	0	0		0	0	0
G	1	Sample X145	25344	30038	30367					G	1	1.10688	1.67195	1.71827					G	1	1.1156	1.70822	1.76267		0.0136125	0.0808836	0
G	2	Sample X146	27785	32941	32898					G	2	1.38018	2.11954	2.11221					G	2	1.40831	2.16388	2.14239		-0.0053743	0.0917596	0
G	3	Sample X147	26651	32485	33378					G	3	1.24824	2.04298	2.19536					G	3	1.25696	2.07924	2.23976		0.0401298	0.122851	0
G	4	Sample X148	30656	36625	35920					G	4	1.75981	2.84759	2.69103					G	4	1.78794	2.89194	2.72121		-0.0426829	0.116658	0
G	5	Sample X149	27238	33917	34681					G	5	1.3154	2.29239	2.437					G	5	1.32412	2.32866	2.4814		0.0381854	0.144661	0
G	6	Sample X150	26787	35180	35031					G	6	1.26359	2.53626	2.50621					G	6	1.29172	2.58061	2.53639		-0.0110553	0.155584	0
G	7	Sample X151	25500	33294	35069					G	7	1.12319	2.1806	2.51384					G	7	1.13191	2.21686	2.55824		0.0853433	0.178291	0
G	8	Sample X152	24513	35192	35245					G	8	1.02242	2.5387	2.54948					G	8	1.05055	2.58305	2.57967		-0.000845028	0.19114	0
G	9	Sample X153	26326	34699	36345					G	9	1.21206	2.44052	2.7843					G	9	1.22078	2.47678	2.82869		0.0879775	0.200989	0
G	10	Sample X154	20714	31655	33009					G	10	0.681795	1.90995	2.13117					G	10	0.709925	1.9543	2.16135		0.0517642	0.181429	0
G	11	Sample X155	24234	33290	34587					G	11	0.994939	2.1799	2.41874					G	11	1.00366	2.21616	2.46314		0.0617446	0.182435	0
G	12	Sample X156	16522	27237	29352					G	12	0.375017	1.31528	1.57857					G	12	0.403147	1.35963	1.60875		0.0622806	0.1507	0
G	13	Sample X157	21072	29428	31905					G	13	0.711056	1.58871	1.94919					G	13	0.719776	1.62497	1.99359		0.0921532	0.159226	0
G	14	Sample X158	14120	20355	23173					G	14	0.224499	0.652983	0.894249					G	14	0.252629	0.697332	0.92443		0.0567745	0.0839752	0
G	15	Sample X159	18538	26139	28182					G	15	0.514809	1.19156	1.42859					G	15	0.523528	1.22783	1.47299		0.0612906	0.118683	0
G	16	Sample X160	11124	15401	18096					G	16	0.0574924	0.302753	0.483009					G	16	0.0856223	0.347102	0.51319		0.0415219	0.053446	0
G	17	Sample X161	15128	21704	24439					G	17	0.285702	0.764048	1.01509					G	17	0.294421	0.800315	1.05948		0.0647924	0.0956329	0
G	18	Sample X162	9751	11746	12951					G	18	-0.0123883	0.0904588	0.156805					G	18	0.0157416	0.134808	0.186986		0.0130445	0.0214055	0
G	19	Sample X163	13724	19603	22296					G	19	0.201184	0.594289	0.815298					G	19	0.209904	0.630555	0.859695		0.057285	0.081224	0
G	20	Sample X164	8958	10306	11264					G	20	-0.0510364	0.0153942	0.0648391					G	20	-0.0229065	0.0597433	0.0950203		0.00881926	0.0147409	0
G	21	Sample X165	13437	16367	18326					G	21	0.184535	0.364804	0.499472					G	21	0.193254	0.40107	0.543869		0.0356998	0.0438269	0
G	22	Sample X166	9095	10081	10468					G	22	-0.0444455	0.00405657	0.0236211					G	22	-0.0163157	0.0484056	0.0538023		0.00134916	0.00876474	0
G	23	Sample X167	9825	9264	9096					G	23	-0.00871948	-0.0362662	-0.0443973					G	23	0	0	0		0	0	0
G	24	Sample X168	9431	9097	9389					G	24	-0.0281299	-0.0443491	-0.0301812					G	24	0	0	0		0	0	0
H	1	Sample X169	29003	39846	45082					H	1	1.53265	3.70224	5.87914					H	1	0.996826	3.36172	5.51032		0.537151	0.564187	0
H	2	Sample X170	20047	29159	34686					H	2	0.628676	1.55305	2.43798					H	2	0.249752	1.21691	2.10896		0.223014	0.232402	0
H	3	Sample X171	29161	41601	48857					H	3	1.55331	4.29385	8.7178					H	3	1.01749	3.95333	8.34899		1.09892	0.916438	0
H	4	Sample X172	20280	29692	36196					H	4	0.647029	1.62432	2.75122					H	4	0.268105	1.28818	2.4222		0.283505	0.269262	0
H	5	Sample X173	31014	43550	49530					H	5	1.81243	5.09878	9.43887					H	5	1.2766	4.75826	9.07006		1.07795	0.974182	0
H	6	Sample X174	20397	27914	34538					H	6	0.656327	1.39578	2.40928					H	6	0.277403	1.05964	2.08026		0.255155	0.225357	0
H	7	Sample X175	33507	45972	53159					H	7	2.21823	6.41075	15.7722					H	7	1.6824	6.07023	15.4034		2.33328	1.71512	1
H	8	Sample X176	23644	27873	35598					H	8	0.938222	1.39081	2.62253					H	8	0.559298	1.05467	2.29352		0.309712	0.216777	0
H	9	Sample X177	31024	43860	51994					H	9	1.81391	5.24473	13.1133					H	9	1.27809	4.90421	12.7445		1.96007	1.4333	0
H	10	Sample X178	16509	18755	20529					H	10	0.374158	0.53067	0.666882					H	10	-0.0047661	0.194531	0.337868		0.0358341	0.0428292	0
H	11	Sample X179	30381	41563	46633					H	11	1.72026	4.27984	6.85139					H	11	1.18444	3.93932	6.48257		0.635812	0.662266	0
H	12	Sample X180	16014	16760	16884					H	12	0.341813	0.390842	0.399156					H	12	-0.0371107	0.0547026	0.0701414		0.0038597	0.0134065	0
H	13	Sample X181	31149	40353	48695					H	13	1.83261	3.86229	8.55705					H	13	1.29678	3.52177	8.18824		1.16662	0.861432	0
H	14	Sample X182	17228	16332	15906					H	14	0.422473	0.362508	0.334853					H	14	0.0435487	0.0263688	0.00583844		-0.00513259	-0.00471378	0
H	15	Sample X183	26624	34970	43275					H	15	1.24521	2.49401	4.97384					H	15	0.709383	2.15349	4.60503		0.612885	0.486955	0
H	16	Sample X184	16114	17846	16557					H	16	0.348289	0.465318	0.377334					H	16	-0.0306352	0.129178	0.0483191		-0.0202148	0.0098693	0
H	17	Sample X185	23635	30331	35758					H	17	0.937371	1.71315	2.65634					H	17	0.401548	1.37263	2.28753		0.228724	0.235747	0
H	18	Sample X186	18564	19940	15781					H	18	0.5167	0.62032	0.326839					H	18	0.137776	0.28418	-0.00217523		-0.0715889	-0.017494	0
H	19	Sample X187	23478	26171	27082					H	19	0.922595	1.19505	1.29731					H	19	0.386772	0.854533	0.9285		0.0184917	0.067716	0
H	20	Sample X188	16041	15090	15569					H	20	0.343559	0.283344	0.313351					H	20	-0.0353652	-0.0527948	-0.0156633		0.00928286	0.00246273	0
H	21	Sample X189	20901	23685	25648					H	21	0.697013	0.942104	1.1388					H	21	0.16119	0.601582	0.769983		0.0421004	0.0760992	0
H	22	Sample X190	17090	16166	16206					H	22	0.413074	0.351668	0.354272					H	22	0.0341499	0.0155284	0.0252579		0.00243237	-0.0011115	0
H	23	Sample X191	18825	15994	16428					H	23	0.535823	0.340522	0.368815					H	23	0	0	0		0	0	0
H	24	Sample X192	16581	15926	15815					H	24	0.378924	0.336139	0.329014					H	24	0	0	0		0	0	0
I	1	Sample X193	26993	32965	36893					I	1	1.28708	2.12364	2.90962					I	1	0.97157	1.89599	2.68149		0.196376	0.21374	0
I	2	Sample X194	22478	32432	37061					I	2	0.831379	2.03424	2.94923					I	2	0.690236	1.93349	2.82318		0.222424	0.266619	0
I	3	Sample X195	25220	34323	39301					I	3	1.09402	2.36817	3.53894					I	3	0.778514	2.14052	3.31081		0.292573	0.316537	0
I	4	Sample X196	21765	32229	37578					I	4	0.769256	2.0011	3.07488					I	4	0.628113	1.90035	2.94883		0.262122	0.29009	0
I	5	Sample X197	26873	36668	43630					I	5	1.27336	2.85745	5.13592					I	5	0.957852	2.6298	4.90779		0.569499	0.493743	0
I	6	Sample X198	18058	26683	31971					I	6	0.480306	1.25184	1.95967					I	6	0.339163	1.15109	1.83362		0.170633	0.186807	0
I	7	Sample X199	25701	35166	42567					I	7	1.14442	2.53342	4.67031					I	7	0.828916	2.30577	4.44218		0.534103	0.451658	0
I	8	Sample X200	16674	22634	25871					I	8	0.385104	0.845287	1.16257					I	8	0.243961	0.744534	1.03652		0.0729975	0.0990704	0
I	9	Sample X201	24264	36197	42969					I	9	0.997873	2.75144	4.83956					I	9	0.682368	2.52379	4.61143		0.521911	0.491133	0
I	10	Sample X202	14344	18541	22500					I	10	0.237866	0.515027	0.833333					I	10	0.0967231	0.414274	0.707283		0.0732523	0.07632	0
I	11	Sample X203	23079	33660	39392					I	11	0.885607	2.24563	3.56561					I	11	0.570102	2.01798	3.33748		0.329874	0.345922	0
I	12	Sample X204	14303	15968	18295					I	12	0.235409	0.338844	0.497243					I	12	0.0942667	0.238091	0.371192		0.0332752	0.0346157	0
I	13	Sample X205	24136	31719	36793					I	13	0.985389	1.91993	2.88631					I	13	0.669884	1.69228	2.65818		0.241475	0.248537	0
I	14	Sample X206	13276	14382	15726					I	14	0.175285	0.240146	0.323327					I	14	0.034142	0.139393	0.197277		0.0144709	0.0203919	0
I	15	Sample X207	20086	26989	32165					I	15	0.631733	1.28662	1.99075					I	15	0.316228	1.05897	1.76262		0.175914	0.180799	0
I	16	Sample X208	12718	14231	14684					I	16	0.143712	0.231106	0.258408					I	16	0.00256953	0.130353	0.132357		0.000501044	0.0162235	0
I	17	Sample X209	19510	24314	28160					I	17	0.587182	1.00277	1.42588					I	17	0.271676	0.775125	1.19775		0.105657	0.11576	0
I	18	Sample X210	12770	12596	12957					I	18	0.146623	0.136908	0.157143					I	18	0.00548025	0.0361551	0.031093		-0.00126551	0.0032016	0
I	19	Sample X211	16558	19789	22349					I	19	0.3774	0.608602	0.819965					I	19	0.0618942	0.380952	0.591839		0.0527216	0.0662431	0
I	20	Sample X212	12922	12443	12462					I	20	0.155168	0.128425	0.129475					I	20	0.0140254	0.0276717	0.00342495		-0.00606168	-0.00132505	0
I	21	Sample X213	17560	19419	21088					I	21	0.445335	0.580259	0.712377					I	21	0.129829	0.35261	0.484251		0.0329103	0.0443027	0
I	22	Sample X214	13121	14821	12354					I	22	0.166439	0.266772	0.123515					I	22	0.0252965	0.166019	-0.00253533		-0.0421386	-0.00347897	0
I	23	Sample X215	15603	14173	14181					I	23	0.315506	0.22765	0.228126					I	23	0	0	0		0	0	0
I	24	Sample X216	12672	11937	12400					I	24	0.141143	0.100753	0.12605					I	24	0	0	0		0	0	0
J	1	Sample X217	21916	30400	32779					J	1	0.782218	1.72297	2.09204					J	1	0.574598	1.50464	1.89214		0.0968765	0.164693	0
J	2	Sample X218	16433	23096	27312					J	2	0.369144	0.887167	1.32403					J	2	0.214935	0.803294	1.1773		0.093501	0.120295	0
J	3	Sample X219	25368	31912	38857					J	3	1.10938	1.9503	3.41212					J	3	0.901758	1.73196	3.21222		0.370065	0.288808	0
J	4	Sample X220	16951	22591	25992					J	4	0.403668	0.841442	1.17561					J	4	0.249458	0.757569	1.02887		0.0678253	0.0974266	0
J	5	Sample X221	26161	34306	40759					J	5	1.19396	2.36495	3.99654					J	5	0.986342	2.14661	3.79664		0.412508	0.351288	0
J	6	Sample X222	15382	20106	23515					J	6	0.30156	0.633303	0.926066					J	6	0.14735	0.549431	0.779331		0.0574749	0.0789975	0
J	7	Sample X223	23030	32812	38763					J	7	0.88112	2.09762	3.38595					J	7	0.6735	1.87928	3.18605		0.326693	0.314069	0
J	8	Sample X224	14830	17363	19076					J	8	0.267323	0.431726	0.554442					J	8	0.113114	0.347853	0.407707		0.0149635	0.0368242	0
J	9	Sample X225	24700	33490	38796					J	9	1.04108	2.2152	3.39511					J	9	0.833456	1.99686	3.19521		0.299587	0.29522	0
J	10	Sample X226	17442	18294	17119					J	10	0.437168	0.497171	0.415044					J	10	0.282959	0.413298	0.268309		-0.0362473	-0.00183119	0
J	11	Sample X227	21468	28206	33092					J	11	0.744057	1.43156	2.14546					J	11	0.536437	1.21322	1.94556		0.183084	0.17614	0
J	12	Sample X228	16935	17940	17474					J	12	0.402589	0.471945	0.439378					J	12	0.24838	0.388072	0.292643		-0.0238573	0.00553297	0
J	13	Sample X229	21113	25882	31338					J	13	0.714442	1.16376	1.86118					J	13	0.506822	0.945418	1.66127		0.178964	0.144307	0
J	14	Sample X230	15949	15687	16072					J	14	0.33762	0.320843	0.345565					J	14	0.18341	0.23697	0.19883		-0.00953491	0.0019275	0
J	15	Sample X231	18601	22363	28733					J	15	0.519397	0.8212	1.49783					J	15	0.311776	0.602863	1.29792		0.173765	0.123269	0
J	16	Sample X232	13200	12499	11969					J	16	0.17094	0.131524	0.102486					J	16	0.0167306	0.047651	-0.0442491		-0.022975	-0.00762246	0
J	17	Sample X233	18160	22360	25463					J	17	0.487572	0.820935	1.11931					J	17	0.279951	0.602598	0.919406		0.079202	0.0799319	0
J	18	Sample X234	13035	12566	12233					J	18	0.161556	0.135241	0.116869					J	18	0.0073469	0.051368	-0.0298656		-0.0203084	-0.00465156	0
J	19	Sample X235	15624	19525	23543					J	19	0.316838	0.588326	0.928697					J	19	0.109218	0.369989	0.728796		0.0897017	0.0774473	0
J	20	Sample X236	13566	12215	11629					J	20	0.191993	0.115884	0.084193					J	20	0.0377834	0.0320111	-0.062542		-0.0236383	-0.0125407	0
J	21	Sample X237	16155	19239	18177					J	21	0.350952	0.566657	0.488786					J	21	0.143332	0.34832	0.288885		-0.0148587	0.0181942	0
J	22	Sample X238	12904	11828	12344					J	22	0.154153	0.0948684	0.122965					J	22	-5.63574e-05	0.0109959	-0.0237704		-0.00869157	-0.00296426	0
J	23	Sample X239	13834	14016	13702					J	23	0.20762	0.218337	0.199901					J	23	0	0	0		0	0	0
J	24	Sample X240	12905	11623	12772					J	24	0.15421	0.0838725	0.146735					J	24	0	0	0		0	0	0
K	1	Sample X241	27200	35064	38561					K	1	1.31098	2.51283	3.3305					K	1	1.08011	2.36088	3.16389		0.200753	0.260472	0
K	2	Sample X242	40154	45701	46150					K	2	3.7985	6.24187	6.52527					K	2	3.64649	6.09989	6.40577		0.0764698	0.344911	0
K	3	Sample X243	27938	37433	41937					K	3	1.3987	3.03906	4.42022					K	3	1.16783	2.8871	4.25361		0.341627	0.385723	0
K	4	Sample X244	41977	48890	48081					K	4	4.43558	8.75113	7.98746					K	4	4.28357	8.60915	7.86796		-0.185297	0.448048	0
K	5	Sample X245	29357	39633	44994					K	5	1.57924	3.63738	5.83					K	5	1.34837	3.48542	5.66339		0.544492	0.539378	0
K	6	Sample X246	39089	48159	47943					K	6	3.47772	8.05654	7.86742					K	6	3.3257	7.91456	7.74792		-0.0416603	0.552777	0
K	7	Sample X247	28858	38113	42728					K	7	1.51387	3.21115	4.73715					K	7	1.283	3.0592	4.57054		0.377835	0.410942	0
K	8	Sample X248	32909	43433	45134					K	8	2.11408	5.04512	5.90845					K	8	1.96207	4.90314	5.78895		0.221452	0.47836	0
K	9	Sample X249	28196	38844	43459					K	9	1.43032	3.40849	5.05698					K	9	1.19946	3.25653	4.89037		0.408459	0.461364	0
K	10	Sample X250	30794	45506	51477					K	10	1.77994	6.12426	12.1662					K	10	1.62793	5.98228	12.0467		1.5161	1.30235	0
K	11	Sample X251	26462	35646	40340					K	11	1.22712	2.63263	3.85809					K	11	0.996248	2.48067	3.69148		0.302702	0.336904	0
K	12	Sample X252	21641	29331	34843					K	12	0.758688	1.57578	2.4688					K	12	0.606674	1.4338	2.34929		0.228874	0.217828	0
K	13	Sample X253	25024	33194	39002					K	13	1.07388	2.16314	3.45295					K	13	0.843012	2.01118	3.28634		0.31879	0.305416	0
K	14	Sample X254	16440	22343	28909					K	14	0.369605	0.819436	1.52046					K	14	0.217592	0.677456	1.40095		0.180875	0.14792	0
K	15	Sample X255	22033	29161	34738					K	15	0.792333	1.55331	2.44814					K	15	0.561465	1.40135	2.28153		0.220045	0.215009	0
K	16	Sample X256	15656	16941	18527					K	16	0.318871	0.402994	0.514009					K	16	0.166857	0.261014	0.394507		0.0333735	0.0284563	0
K	17	Sample X257	19131	23733	26738					K	17	0.558553	0.946659	1.25804					K	17	0.327685	0.794702	1.09143		0.0741825	0.0954684	0
K	18	Sample X258	13885	14091	15856					K	18	0.210615	0.222778	0.331642					K	18	0.0586014	0.0807977	0.21214		0.0328356	0.0191924	0
K	19	Sample X259	18612	21301	23298					K	19	0.520199	0.730058	0.905809					K	19	0.289332	0.5781	0.739199		0.0402747	0.0562335	0
K	20	Sample X260	13906	13108	13337					K	20	0.21185	0.1657	0.178782					K	20	0.0598363	0.0237199	0.0592802		0.00889008	-6.95064e-05	0
K	21	Sample X261	15004	15578	16591					K	21	0.278025	0.313921	0.379587					K	21	0.0471572	0.161964	0.212977		0.0127534	0.0207275	0
K	22	Sample X262	12976	11821	12767					K	22	0.158217	0.0944914	0.146455					K	22	0.00620367	-0.0474886	0.0269531		0.0186104	0.00259368	0
K	23	Sample X263	14227	12865	13124					K	23	0.230868	0.151957	0.16661					K	23	0	0	0		0	0	0
K	24	Sample X264	12866	12687	12281					K	24	0.152013	0.14198	0.119502					K	24	0	0	0		0	0	0
L	1	Sample X265	48046	50458	50185					L	1	7.95675	10.6	10.2356					L	1	7.63361	10.4054	9.87028		-0.133788	0.279583	0
L	2	Sample X266	44710	47189	46000					L	2	5.67528	7.25724	6.42857					L	2	5.55512	7.16903	6.34331		-0.206431	0.098524	0
L	3	Sample X267	48524	53186	54352					L	3	8.3923	15.8446	19.6317					L	3	8.06916	15.65	19.2664		0.90409	1.39965	1
L	4	Sample X268	47190	51012	50307					L	4	7.258	11.4074	10.3959					L	4	7.13784	11.3192	10.3106		-0.252146	0.3966	0
L	5	Sample X269	49696	54504	55004					L	5	9.63121	20.2438	22.52					L	5	9.30808	20.0493	22.1547		0.526355	1.60583	1
L	6	Sample X270	41775	48462	48678					L	6	4.35871	8.33377	8.54045					L	6	4.23855	8.24556	8.45519		0.0524074	0.52708	0
L	7	Sample X271	50399	54786	55045					L	7	10.5195	21.4739	22.727					L	7	10.1963	21.2794	22.3617		0.270586	1.52067	1
L	8	Sample X272	34881	43998	47605					L	8	2.47631	5.31152	7.58471					L	8	2.35615	5.22332	7.49945		0.569033	0.642912	0
L	9	Sample X273	48535	55098	55615					L	9	8.40275	22.9998	26.0063					L	9	8.07961	22.8052	25.6409		0.708923	2.19517	1
L	10	Sample X274	29869	41980	44368					L	10	1.64855	4.43674	5.49642					L	10	1.52839	4.34853	5.41116		0.265656	0.485346	0
L	11	Sample X275	45617	52863	55094					L	11	6.19082	15.0144	22.979					L	11	5.86768	14.8198	22.6137		1.94847	2.09325	1
L	12	Sample X276	22417	32473	37808					L	12	0.825972	2.041	3.13266					L	12	0.705811	1.95279	3.0474		0.273652	0.292698	0
L	13	Sample X277	42043	49506	52169					L	13	4.46107	9.41157	13.4622					L	13	4.13794	9.21702	13.0969		0.969962	1.11987	1
L	14	Sample X278	18157	24987	29225					L	14	0.487358	1.0701	1.56174					L	14	0.367197	0.981896	1.47648		0.123645	0.13866	0
L	15	Sample X279	34174	42437	46893					L	15	2.34008	4.61724	7.03689					L	15	2.01695	4.42269	6.67156		0.562218	0.581826	0
L	16	Sample X280	15378	18535	21994					L	16	0.301309	0.514591	0.788954					L	16	0.181148	0.426385	0.703692		0.069327	0.065318	0
L	17	Sample X281	26569	34817	39963					L	17	1.23904	2.46367	3.73846					L	17	0.915908	2.26912	3.37313		0.276002	0.307153	0
L	18	Sample X282	13612	15059	17323					L	18	0.194662	0.281425	0.428978					L	18	0.0745018	0.193218	0.343716		0.0376244	0.0336518	0
L	19	Sample X283	23123	30637	34238					L	19	0.889647	1.75706	2.35211					L	19	0.56651	1.56251	1.98678		0.106067	0.177533	0
L	20	Sample X284	13890	14640	15516					L	20	0.210909	0.255732	0.309999					L	20	0.0907481	0.167526	0.224737		0.0143028	0.0167486	0
L	21	Sample X285	20794	27414	27618					L	21	0.688288	1.336	1.36017					L	21	0.365151	1.14146	0.99484		-0.0366543	0.078711	0
L	22	Sample X286	12906	12313	13586					L	22	0.154266	0.121259	0.193153					L	22	0.0341054	0.0330534	0.107891		0.0187094	0.0092232	0
L	23	Sample X287	15723	13610	16375					L	23	0.323136	0.194546	0.36533					L	23	0	0	0		0	0	0
L	24	Sample X288	12293	11704	11649					L	24	0.120161	0.0882061	0.0852619					L	24	0	0	0		0	0	0
M	1	Sample X289	35512	42311	44487					M	1	2.60454	4.56654	5.55776					M	1	2.40084	4.48528	5.4659		0.245156	0.383132	0
M	2	Sample X290	39334	43205	42992					M	2	3.54858	4.94269	4.84948					M	2	3.52573	4.9322	4.8401		-0.023025	0.164297	0
M	3	Sample X291	35066	41931	45170					M	3	2.51323	4.41793	5.92886					M	3	2.30954	4.33667	5.83701		0.375084	0.440933	0
M	4	Sample X292	40167	46161	46572					M	4	3.80263	6.53244	6.80891					M	4	3.77977	6.52195	6.79952		0.0693927	0.377469	0
M	5	Sample X293	37122	44148	49090					M	5	2.96376	5.38544	8.95738					M	5	2.76007	5.30418	8.86552		0.890335	0.763182	0
M	6	Sample X294	39735	46511	47509					M	6	3.66827	6.76681	7.50721					M	6	3.64541	6.75632	7.49782		0.185376	0.481551	0
M	7	Sample X295	35449	41815	43336					M	7	2.59144	4.3738	5.0012					M	7	2.38775	4.29254	4.90934		0.154201	0.3152	0
M	8	Sample X296	33685	41356	43338					M	8	2.25014	4.20457	5.0021					M	8	2.22729	4.19408	4.99272		0.19966	0.345679	0
M	9	Sample X297	35598	41545	48305					M	9	2.62253	4.27323	8.18833					M	9	2.41883	4.19197	8.09647		0.976125	0.709705	0
M	10	Sample X298	28728	39108	40895					M	10	1.49719	3.48315	4.04279					M	10	1.47433	3.47266	4.0334		0.140187	0.319884	0
M	11	Sample X299	33410	38952	46842					M	11	2.20102	3.43881	6.99992					M	11	1.99732	3.35755	6.90807		0.88763	0.613844	0
M	12	Sample X300	22113	32386	38299					M	12	0.799285	2.02669	3.2601					M	12	0.776428	2.0162	3.25072		0.308631	0.309286	0
M	13	Sample X301	30848	38840	45056					M	13	1.78787	3.40737	5.86456					M	13	1.58417	3.32611	5.77271		0.611648	0.523566	0
M	14	Sample X302	17550	24388	28823					M	14	0.444641	1.01005	1.50937					M	14	0.421784	0.999559	1.49998		0.125105	0.134775	0
M	15	Sample X303	27274	34750	40340					M	15	1.31959	2.4505	3.85809					M	15	1.1159	2.36924	3.76623		0.349249	0.331292	0
M	16	Sample X304	14269	18303	22203					M	16	0.233376	0.497818	0.807141					M	16	0.210519	0.487324	0.797756		0.077608	0.0734046	0
M	17	Sample X305	23977	30185	35190					M	17	0.970005	1.69252	2.53829					M	17	0.766309	1.61126	2.44644		0.208793	0.210016	0
M	18	Sample X306	13401	15885	17445					M	18	0.182461	0.333503	0.437375					M	18	0.159604	0.323009	0.42799		0.0262451	0.0335483	0
M	19	Sample X307	20117	24802	28852					M	19	0.634167	1.05134	1.5131					M	19	0.430471	0.97008	1.42124		0.112791	0.123847	0
M	20	Sample X308	14102	13930	15315					M	20	0.22343	0.213262	0.297359					M	20	0.200573	0.202769	0.287974		0.0213014	0.0109251	0
M	21	Sample X309	16019	18944	21796					M	21	0.342136	0.544622	0.771909					M	21	0.13844	0.463364	0.680053		0.0541723	0.0677017	0
M	22	Sample X310	12696	11103	12168					M	22	0.142483	0.0563941	0.113313					M	22	0.119626	0.0459002	0.103928		0.014507	-0.00196218	0
M	23	Sample X311	13767	11574	11772					M	23	0.203696	0.081258	0.0918554					M	23	0	0	0		0	0	0
M	24	Sample X312	10453	10209	10187					M	24	0.0228571	0.0104939	0.0093851					M	24	0	0	0		0	0	0
N	1	Sample X313	40086	42620	43544					N	1	3.77699	4.69217	5.09601					N	1	3.82534	4.69077	5.1084		0.104407	0.160383	0
N	2	Sample X314	38271	37923	36312					N	2	3.25268	3.162	2.77693					N	2	3.3238	3.25385	2.86688		-0.0967428	-0.0571152	0
N	3	Sample X315	39997	43226	43028					N	3	3.74906	4.95201	4.86507					N	3	3.79741	4.95061	4.87746		-0.018287	0.135006	0
N	4	Sample X316	40099	41052	39543					N	4	3.78109	4.097	3.61038					N	4	3.85221	4.18885	3.70032		-0.122132	-0.018986	0
N	5	Sample X317	40440	44735	45403					N	5	3.89059	5.68867	6.0634					N	5	3.93894	5.68727	6.07579		0.0971314	0.267107	0
N	6	Sample X318	35947	38604	39375					N	6	2.69686	3.34221	3.56061					N	6	2.76797	3.43406	3.65055		0.0541222	0.110322	0
N	7	Sample X319	38510	43416	43248					N	7	3.31666	5.03739	4.9618					N	7	3.36501	5.03598	4.97418		-0.0154502	0.201147	0
N	8	Sample X320	33375	37288	38137					N	8	2.19484	3.0037	3.21742					N	8	2.26595	3.09555	3.30737		0.052955	0.130177	0
N	9	Sample X321	36066	43444	43874					N	9	2.7227	5.05013	5.25146					N	9	2.77104	5.04873	5.26385		0.0537784	0.3116	0
N	10	Sample X322	28714	35346	38165					N	10	1.4954	2.57017	3.22475					N	10	1.56651	2.66202	3.3147		0.16317	0.218523	0
N	11	Sample X323	35870	40415	40329					N	11	2.68027	3.88244	3.85453					N	11	2.72862	3.88103	3.86692		-0.0035286	0.142288	0
N	12	Sample X324	20226	25430	35008					N	12	0.642757	1.11585	2.5016					N	12	0.713874	1.2077	2.59154		0.345961	0.234709	0
N	13	Sample X325	31622	39147	39260					N	13	1.90482	3.49434	3.527					N	13	1.95317	3.49294	3.53939		0.0116122	0.198278	0
N	14	Sample X326	16002	21004	24626					N	14	0.341038	0.705457	1.03367					N	14	0.412156	0.797304	1.12361		0.081577	0.088932	0
N	15	Sample X327	26215	30163	32939					N	15	1.19987	1.68943	2.11919					N	15	1.24821	1.68803	2.13158		0.110888	0.110421	0
N	16	Sample X328	21326	22720	24457					N	16	0.732146	0.853004	1.01687					N	16	0.803263	0.944851	1.10681		0.0404897	0.0379434	0
N	17	Sample X329	20492	25195	28032					N	17	0.663916	1.09144	1.41016					N	17	0.712263	1.09004	1.42255		0.0831278	0.0887857	0
N	18	Sample X330	10475	11640	14433					N	18	0.0239778	0.0847808	0.243213					N	18	0.0950955	0.176628	0.333157		0.0391322	0.0297576	0
N	19	Sample X331	16256	18845	21460					N	19	0.357535	0.537298	0.743383					N	19	0.405881	0.535897	0.755772		0.0549686	0.0437363	0
N	20	Sample X332	11524	11094	12322					N	20	0.0785956	0.0559236	0.121754					N	20	0.149713	0.147771	0.211698		0.0159818	0.00774804	0
N	21	Sample X333	12538	16125	17409					N	21	0.133686	0.349003	0.434892					N	21	0.182033	0.347602	0.447281		0.0249196	0.033156	0
N	22	Sample X334	5839	5743	5940					N	22	-0.192066	-0.19615	-0.187754					N	22	-0.120949	-0.104303	-0.097811		0.00162295	0.00289219	0
N	23	Sample X335	9014	10028	9751					N	23	-0.0483466	0.00140078	-0.0123883					N	23	0	0	0		0	0	0
N	24	Sample X336	8536	8093	8134					N	24	-0.0711177	-0.091847	-0.0899433					N	24	0	0	0		0	0	0
						#DIV/0!	#DIV/0!	24
			5839	5743	5940	5840.67	53704	12
			50399	55098	55615
						#DIV/0!	#DIV/0!	6
						#DIV/0!	#DIV/0!	3
						#DIV/0!	#DIV/0!	1.5
						#DIV/0!	#DIV/0!	0.75
						#DIV/0!	#DIV/0!	0.375
						#DIV/0!	#DIV/0!	0.1875
						#DIV/0!	#DIV/0!	0.09375
						#DIV/0!	#DIV/0!	0.046875
						#DIV/0!	#DIV/0!	0.0234375
						#DIV/0!	#DIV/0!	0
[truncated: 12 more columns]
