# Supplementary material for: PDZ-directed substrate recruitment is the primary determinant of specific 4E-BP1 dephosphorylation by PP1-Neurabin
Source: eLife journal article supplement (doi:10.7554/elife.103403), 2024-11-20
Supplement: fig5-data1 [file replicate2.xlsx]

## Sheet: All Cycles
Well Row	Well Col	Content	Raw Data (425-10/460-20)	Raw Data (425-10/460-20)	Raw Data (425-10/460-20)				convert to phosphate	Well Row	Well Col	Raw Data (425-10/460-20)	Raw Data (425-10/460-20)	Raw Data (425-10/460-20)				normalize to the lasst column	Well Row	Well Col	Raw Data (425-10/460-20)	Raw Data (425-10/460-20)	Raw Data (425-10/460-20)								PP1-Neb 0.25 nM
		Time [s]	0	240	480							0	4	8							0	4	8								4ebp-pdz	4ebp-sgs	irsp53-pdz	irsp53-sgs	L5A-PDZ	L5A-SGS	V1	V2	V3	V4	V5	V6	V7	V8			4ebp-pdz	4ebp-sgs	irsp53-pdz
A	1	Sample X1	24721	33314	39701				0.640308	A	1	1.04318	2.1841	3.65794					A	1	0.423721	1.56067	3.04833		0.371916	0.328076	0			600	0.328076	0.0777953	0.387595	0.453449	0.275083	0.0837079	0.214229	0.191872	0.141484	0.121252	0.258484	4.04909	0.649477	0.267315			0.733521	0.0600036	0.121203
A	2	Sample X2	19235	38065	45560					A	2	0.566356	3.19866	6.15651					A	2	-0.174589	2.59915	5.69358		0.773608	0.733521	0			300	0.583848	0.0500679	0.928639	0.389104	0.590208	0.122716	0.325671	0.261022	0.172955	0.150704	0.297085	10.0318	0.667349	0.275737			0.504747	0.0530262	0.287249
A	3	Sample X3	25631	37995	44936					A	3	1.137	3.18053	5.79793					A	3	0.517536	2.55709	5.18832		0.657808	0.583848	0			150	0.626487	0.042018	0.866164	0.286507	0.833181	0.189653	0.29425	0.298709	0.20266	0.179474	0.374282	4.19271	0.702837	0.236835			0.307613	0.035386	0.59316
A	4	Sample X4	16785	33082	41210					A	4	0.392514	2.14373	4.15247					A	4	-0.348431	1.54423	3.68955		0.53633	0.504747	0			75	0.772235	0.034764	1.21868	0.177994	1.14609	0.0955964	0.366398	0.350682	0.219906	0.216264	0.44473	5.05979	0.673548	0.415107			0.18165	0.0241357	0.421644
A	5	Sample X5	22912	35770	45070					A	5	0.870362	2.65889	5.8724					A	5	0.250899	2.03546	5.2628		0.806835	0.626487	0			37.5	0.626583	0.0134865	1.68307	0.0882525	1.0193	0.0743302	0.340241	0.194561	0.23631	0.229291	0.444464	3.82078	0.644016	0.370153			0.118332	0.0133192	0.648891
A	6	Sample X6	17581	28060	35632					A	6	0.446793	1.41359	2.62968					A	6	-0.294152	0.814081	2.16675		0.338167	0.307613	0			18.75	0.514025	0.00201145	0.96768	0.0415232	0.789152	0.0370557	0.351253	0.299614	0.240994	0.235546	0.439243	4.29296	0.767078	0.325592			0.0703732	0.007087	0.397138
A	7	Sample X7	22378	35960	46829					A	7	0.822524	2.69967	6.99055					A	7	0.203061	2.07623	6.38094		1.07618	0.772235	0			9.375	0.266317	-1.05295e-05	0.783331	0.025571	0.518683	0.0171627	0.324035	0.388124	0.232667	0.191065	0.368181	1.54537	0.513	0.316699			0.0406908	-0.00999191	0.346641
A	8	Sample X8	14355	22170	28061					A	8	0.238526	0.804256	1.41371					A	8	-0.502419	0.204749	0.950783		0.186508	0.18165	0			4.6875	0.250261	-0.00240402	0.455034	0.00454848	0.414303	0.00518273	0.233535	0.271942	0.15059	0.128172	0.248572	0.822716	0.348636	0.241552			0.0271124	0.0114623	0.322077
A	9	Sample X9	23798	35258	45217					A	9	0.952848	2.55214	5.95566					A	9	0.333385	1.9287	5.34605		0.854338	0.626583	0			2.34375	0.125713	0.000351975	0.46423	0.00773883	0.236932	0.00402367	0.175919	0.173823	0.161531	0.0811208	0.137595	0.434234	0.255134	0.164147			0.0446386	0.0164961	0.250347
A	10	Sample X10	15471	21681	24037					A	10	0.307159	0.762089	0.975795					A	10	-0.433785	0.162583	0.512867		0.087571	0.118332	0			1.17188	0.0459655	-0.00829074	0.197112	-0.0015309	0.118801	0.000974746	0.0994625	0.108372	0.06641	0.056243	0.0674789	0.23682	0.139281	0.0917147			0.00722954	0.00363521	0.135691
A	11	Sample X11	26353	36467	44010					A	11	1.21504	2.81169	5.31739					A	11	0.595579	2.18825	4.70778		0.629882	0.514025	0			0.585938	0.00238478	0.00026535	0.0964403	-0.000525627	0.0617815	-0.000299224	0.0653772	0.0644277	0.0411416	0.0315774	0.0712069	0.145535	0.077296	0.0494079			0.0341744	0.00732342	0.0858028
A	12	Sample X12	16498	17906	20423					A	12	0.373431	0.469544	0.6584					A	12	-0.367514	-0.129962	0.195472		0.0813586	0.0703732	0			0	0	0	0	0	0	0	0	0	0	0	0	0	0	0			0	0	0
A	13	Sample X13	23606	31115	37499					A	13	0.934632	1.82751	3.05531					A	13	0.315169	1.20407	2.4457		0.310408	0.266317	0
A	14	Sample X14	17266	16967	17949					A	14	0.425071	0.404748	0.472581					A	14	-0.315873	-0.194759	0.00965307		0.051103	0.0406908	0				3	27	51	75	99	123	147	171	195	219	243	267	291	315	339		3	27	51
A	15	Sample X15	21999	29850	36333					A	15	0.789387	1.64594	2.78162					A	15	0.169924	1.0225	2.17201		0.287377	0.250261	0				PP1-Neb 0.25 nM
A	16	Sample X16	18393	17279	17529					A	16	0.504302	0.425961	0.443185					A	16	-0.236643	-0.173545	-0.0197431		0.0384505	0.0271124	0				4ebp-pdz	4ebp-sgs	irsp53-pdz	irsp53-sgs	L5A-PDZ	L5A-SGS	V1	V2	V3	V4	V5	V6	V7	V8			4ebp-pdz	4ebp-sgs	irsp53-pdz
A	17	Sample X17	21732	26855	30673					A	17	0.766437	1.27131	1.76228					A	17	0.146974	0.64787	1.15268		0.126202	0.125713	0		0	600	0.328076	0.0777953	0.387595	0.453449	0.275083	0.0837079	0.214229	0.191872	0.141484	0.121252	0.258484	na	0.649477	0.267315			0.733521	0.0600036	0.121203
A	18	Sample X18	15828	16624	17029					A	18	0.329847	0.381778	0.408939					A	18	-0.411098	-0.217729	-0.0539893		0.0409348	0.0446386	0		2	300	0.583848	0.0500679	0.928639	0.389104	0.590208	0.122716	0.325671	0.261022	0.172955	0.150704	0.297085	na	0.667349	0.275737			0.504747	0.0530262	0.287249
A	19	Sample X19	25841	28671	28884					A	19	1.15936	1.48991	1.51723					A	19	0.539895	0.866475	0.907618		0.0102858	0.0459655	0		4	150	0.626487	0.042018	0.866164	0.286507	0.833181	0.189653	0.29425	0.298709	0.20266	0.179474	0.374282	na	0.702837	0.236835			0.307613	0.035386	0.59316
A	20	Sample X20	21926	19698	19189					A	20	0.78308	0.601583	0.5629					A	20	0.0421355	0.00207649	0.0999719		0.0244738	0.00722954	0		6	75	0.772235	0.034764	1.21868	0.177994	1.14609	0.0955964	0.366398	0.350682	0.219906	0.216264	0.44473	na	0.673548	0.415107			0.18165	0.0241357	0.421644
A	21	Sample X21	23320	21910	23419					A	21	0.907852	0.781701	0.917074					A	21	0.288389	0.158263	0.307467		0.037301	0.00238478	0		8	37.5	0.626583	0.0134865	na	0.0882525	1.0193	0.0743302	0.340241	0.194561	0.23631	0.229291	0.444464	na	0.644016	0.370153			0.118332	0.0133192	0.648891
A	22	Sample X22	21811	21105	21757					A	22	0.773194	0.713781	0.768572					A	22	0.0322491	0.114274	0.305644		0.0478425	0.0341744	0		10	18.75	0.514025	0.00201145	0.96768	0.0415232	0.789152	0.0370557	0.351253	0.299614	0.240994	0.235546	0.439243	na	0.767078	0.325592			0.0703732	0.007087	0.397138
A	23	Sample X23	19929	19980	19802					A	23	0.619463	0.623438	0.609607					A	23	0	0	0		0	0	0		12	9.375	0.266317	-1.05295e-05	0.783331	0.025571	0.518683	0.0171627	0.324035	0.388124	0.232667	0.191065	0.368181	na	0.513	0.316699			0.0406908	-0.00999191	0.346641
A	24	Sample X24	21431	19671	17812					A	24	0.740945	0.599507	0.462928					A	24	0	0	0		0	0	0		14	4.6875	0.250261	-0.00240402	0.455034	0.00454848	0.414303	0.00518273	0.233535	0.271942	0.15059	0.128172	0.248572	0.822716	0.348636	0.241552			0.0271124	0.0114623	0.322077
B	1	Sample X25	20122	23162	26788					B	1	0.63456	0.893235	1.2637					B	1	0.324245	0.597002	0.946608		0.0874014	0.0777953	0		16	2.34375	0.125713	0.000351975	0.46423	0.00773883	0.236932	0.00402367	0.175919	0.173823	0.161531	0.0811208	0.137595	0.434234	0.255134	0.164147			0.0446386	0.0164961	0.250347
B	2	Sample X26	14692	17394	20576					B	2	0.258895	0.433859	0.670657					B	2	-0.0234585	0.255536	0.45657		0.0502585	0.0600036	0		18	1.17188	0.0459655	-0.00829074	0.197112	-0.0015309	0.118801	0.000974746	0.0994625	0.108372	0.06641	0.056243	0.0674789	0.23682	0.139281	0.0917147			0.00722954	0.00363521	0.135691
B	3	Sample X27	19077	21117	23892					B	3	0.554517	0.714773	0.961837					B	3	0.244202	0.41854	0.644745		0.0565513	0.0500679	0		20	0.585938	0.00238478	0.00026535	0.0964403	-0.000525627	0.0617815	-0.000299224	0.0653772	0.0644277	0.0411416	0.0315774	0.0712069	0.145535	0.077296	0.0494079			0.0341744	0.00732342	0.0858028
B	4	Sample X28	13469	16613	18913					B	4	0.186381	0.381047	0.542325					B	4	-0.0959721	0.202725	0.328238		0.0313783	0.0530262	0		22	0	0	0	0	0	0	0	0	0	0	0	0	0	0	0			0	0	0
B	5	Sample X29	15144	18021	20059					B	5	0.286695	0.477679	0.629616					B	5	-0.0236198	0.181446	0.312524		0.0327695	0.042018	0
B	6	Sample X30	12720	14435	16273					B	6	0.143824	0.243334	0.358646					B	6	-0.138529	0.065011	0.144558		0.0198869	0.035386	0
B	7	Sample X31	13702	15753	18121					B	7	0.199901	0.32505	0.48479					B	7	-0.110414	0.0288174	0.167698		0.0347201	0.034764	0
B	8	Sample X32	11882	13565	14088					B	8	0.0977805	0.191935	0.2226					B	8	-0.184573	0.0136122	0.00851256		-0.00127492	0.0241357	0
B	9	Sample X33	13931	15904	15799					B	9	0.213321	0.334724	0.32799					B	9	-0.0969937	0.0384913	0.0108985		-0.00689822	0.0134865	0
B	10	Sample X34	12894	13522	13564					B	10	0.15359	0.189444	0.191877					B	10	-0.128763	0.0111217	-0.0222102		-0.00833299	0.0133192	0
B	11	Sample X35	14174	14258	14555					B	11	0.227709	0.232718	0.250578					B	11	-0.0826058	-0.0635146	-0.0665142		-0.000749903	0.00201145	0
B	12	Sample X36	12586	12646	12377					B	12	0.136352	0.139693	0.124782					B	12	-0.146001	-0.0386302	-0.0893051		-0.0126687	0.007087	0
B	13	Sample X37	14003	14133	14116					B	13	0.217569	0.225271	0.224261					B	13	-0.0927464	-0.070962	-0.0928307		-0.00546716	-1.05295e-05	0
B	14	Sample X38	14752	13193	12187					B	14	0.262553	0.170541	0.114352					B	14	-0.0198002	-0.007782	-0.0997355		-0.0229884	-0.00999191	0
B	15	Sample X39	14965	14042	14762					B	15	0.275619	0.219875	0.263164					B	15	-0.034696	-0.0763582	-0.0539281		0.00560752	-0.00240402	0
B	16	Sample X40	12116	11869	12542					B	16	0.110475	0.0970788	0.133908					B	16	-0.171878	-0.0812439	-0.0801793		0.00026615	0.0114623	0
B	17	Sample X41	14116	14236	14277					B	17	0.224261	0.231405	0.233854					B	17	-0.0860538	-0.0648283	-0.083238		-0.00460242	0.000351975	0
B	18	Sample X42	12557	14122	13677					B	18	0.134741	0.224617	0.198444					B	18	-0.147613	0.0462947	-0.0156437		-0.0154846	0.0164961	0
B	19	Sample X43	14951	14548	13963					B	19	0.274756	0.250154	0.215207					B	19	-0.0355586	-0.0460789	-0.101885		-0.0139514	-0.00829074	0
B	20	Sample X44	13730	13639	13049					B	20	0.201534	0.196232	0.16235					B	20	-0.0808187	0.017909	-0.0517371		-0.0174115	0.00363521	0
B	21	Sample X45	14643	14741	14789					B	21	0.255914	0.261882	0.264814					B	21	-0.0544008	-0.0343513	-0.052278		-0.00448167	0.00026535	0
B	22	Sample X46	14340	14203	14178					B	22	0.237626	0.229436	0.227947					B	22	-0.0447273	0.0511137	0.0138601		-0.00931341	0.00732342	0
B	23	Sample X47	15521	15297	15628					B	23	0.310315	0.296233	0.317092					B	23	0	0	0		0	0	0
B	24	Sample X48	15074	13329	13944					B	24	0.282353	0.178323	0.214087					B	24	0	0	0		0	0	0
C	1	Sample X49	44970	47493	49087					C	1	5.8167	7.4944	8.95423					C	1	5.48781	7.15046	8.58857		0.359529	0.387595	0
C	2	Sample X50	42804	44369	44758					C	2	4.76913	5.49693	5.70102					C	2	4.48542	5.22279	5.45504		0.0580624	0.121203	0
C	3	Sample X51	43090	48968	51587					C	3	4.89208	8.83067	12.358					C	3	4.56319	8.48673	11.9923		0.876393	0.928639	0
C	4	Sample X52	37996	43727	44259					C	4	3.18079	5.18144	5.44105					C	4	2.89707	4.90729	5.19506		0.0719413	0.287249	0
C	5	Sample X53	37886	47432	50094					C	5	3.15253	7.44589	10.1186					C	5	2.82364	7.10195	9.75296		0.662752	0.866164	0
C	6	Sample X54	31986	41617	46368					C	6	1.96205	4.29976	6.6696					C	6	1.67834	4.02562	6.42362		0.599499	0.59316	0
C	7	Sample X55	34538	46308	51494					C	7	2.40928	6.62942	12.1955					C	7	2.08039	6.28547	11.8299		1.38609	1.21868	0
C	8	Sample X56	28526	42115	42893					C	8	1.47153	4.4891	4.80695					C	8	1.18782	4.21496	4.56097		0.0865021	0.421644	0
C	9	Sample X57	33711	47320	53153					C	9	2.25484	7.35804	15.7562					C	9	1.92595	7.0141	15.3905		2.0941	1.68307	1
C	10	Sample X58	25922	40696	45830					C	10	1.16806	3.97534	6.32145					C	10	0.884339	3.7012	6.07547		0.593567	0.648891	0
C	11	Sample X59	29932	44756	49527					C	11	1.65724	5.69995	9.43545					C	11	1.32836	5.356	9.0698		0.928449	0.96768	0
C	12	Sample X60	22556	36778	40703					C	12	0.838319	2.88283	3.97769					C	12	0.554602	2.60869	3.73171		0.280755	0.397138	0
C	13	Sample X61	27575	42180	47695					C	13	1.35505	4.51459	7.65847					C	13	1.02616	4.17064	7.29281		0.780543	0.783331	0
C	14	Sample X62	21154	34296	39003					C	14	0.717835	2.36306	3.45323					C	14	0.434118	2.08892	3.20725		0.279583	0.346641	0
C	15	Sample X63	24343	37853	42597					C	15	1.00562	3.14411	4.68267					C	15	0.676737	2.80016	4.31701		0.379213	0.455034	0
C	16	Sample X64	19530	30128	37788					C	16	0.588708	1.68452	3.12759					C	16	0.304991	1.41038	2.8816		0.367806	0.322077	0
C	17	Sample X65	21013	32612	42032					C	17	0.706197	2.06404	4.45681					C	17	0.377311	1.7201	4.09115		0.592765	0.46423	0
C	18	Sample X66	16579	28037	34194					C	18	0.378791	1.41077	2.34383					C	18	0.095075	1.13663	2.09785		0.240305	0.250347	0
C	19	Sample X67	18925	27343	33158					C	19	0.543214	1.32766	2.15688					C	19	0.214327	0.983716	1.79122		0.201877	0.197112	0
C	20	Sample X68	15907	22331	27806					C	20	0.334917	0.818379	1.38271					C	20	0.0512007	0.544238	1.13673		0.148122	0.135691	0
C	21	Sample X69	18148	23674	27062					C	21	0.486715	0.941061	1.29501					C	21	0.157829	0.597115	0.929351		0.0830591	0.0964403	0
C	22	Sample X70	16182	20879	24300					C	22	0.352709	0.695215	1.0014					C	22	0.0689926	0.421074	0.755415		0.0835852	0.0858028	0
C	23	Sample X71	15813	16047	16380					C	23	0.328886	0.343947	0.365658					C	23	0	0	0		0	0	0
C	24	Sample X72	15096	14941	14479					C	24	0.283716	0.274141	0.245985					C	24	0	0	0		0	0	0
D	1	Sample X73	37953	43699	46565					D	1	3.16971	5.16824	6.80406					D	1	2.88878	4.86624	6.51637		0.412531	0.453449	0
D	2	Sample X74	35219	42235	45247					D	2	2.54419	4.53631	5.97285					D	2	2.27735	4.18769	5.72439		0.384175	0.43088	0
D	3	Sample X75	34425	40541	44389					D	3	2.38759	3.92376	5.50717					D	3	2.10666	3.62176	5.21948		0.39943	0.389104	0
D	4	Sample X76	32836	41041	44255					D	4	2.10168	4.09317	5.43903					D	4	1.83485	3.74456	5.19057		0.361501	0.419465	0
D	5	Sample X77	29017	37719	40263					D	5	1.53447	3.11016	3.83328					D	5	1.25354	2.80816	3.54559		0.184358	0.286507	0
D	6	Sample X78	28868	41334	44509					D	6	1.51516	4.19667	5.5692					D	6	1.24833	3.84805	5.32074		0.368172	0.509052	0
D	7	Sample X79	25081	31724	35052					D	7	1.07971	1.92071	2.51042					D	7	0.798784	1.61871	2.22273		0.151005	0.177994	0
D	8	Sample X80	25649	41369	44308					D	8	1.1389	4.20925	5.46584					D	8	0.872071	3.86063	5.21738		0.339187	0.543164	0
D	9	Sample X81	21931	26616	28721					D	9	0.783512	1.24431	1.49629					D	9	0.502582	0.942309	1.2086		0.0665732	0.0882525	0
D	10	Sample X82	22839	39100	41944					D	10	0.863742	3.48086	4.42291					D	10	0.596908	3.13225	4.17445		0.260549	0.447192	0
D	11	Sample X83	19011	21754	23111					D	11	0.549599	0.768316	0.888544					D	11	0.268669	0.466316	0.600854		0.0336346	0.0415232	0
D	12	Sample X84	21529	36962	39159					D	12	0.749201	2.92582	3.49779					D	12	0.482367	2.5772	3.24933		0.168032	0.345871	0
D	13	Sample X85	16704	18149	19657					D	13	0.387103	0.486786	0.598431					D	13	0.106173	0.184787	0.310741		0.0314886	0.025571	0
D	14	Sample X86	19865	36048	39365					D	14	0.614489	2.71877	3.55767					D	14	0.347655	2.37016	3.30921		0.234763	0.370194	0
D	15	Sample X87	16043	16760	16700					D	15	0.343688	0.390842	0.386836					D	15	0.0627587	0.0888423	0.0991465		0.00257604	0.00454848	0
D	16	Sample X88	19134	31267	38430					D	16	0.558777	1.8504	3.29509					D	16	0.291944	1.50179	3.04662		0.38621	0.344335	0
D	17	Sample X89	16225	17132	17253					D	17	0.355511	0.415928	0.424182					D	17	0.0745816	0.113928	0.136492		0.00564095	0.00773883	0
D	18	Sample X90	18473	27536	34530					D	18	0.51009	1.35042	2.40773					D	18	0.243256	1.00181	2.15927		0.289367	0.239502	0
D	19	Sample X91	15525	15833	15438					D	19	0.310568	0.330167	0.305081					D	19	0.0296382	0.0281678	0.017391		-0.0026942	-0.0015309	0
D	20	Sample X92	16532	22836	28295					D	20	0.375679	0.86347	1.4426					D	20	0.108845	0.514857	1.19413		0.16982	0.135661	0
D	21	Sample X93	15743	15864	15783					D	21	0.324412	0.332155	0.326967					D	21	0.0434825	0.0301556	0.0392774		0.00228045	-0.000525627	0
D	22	Sample X94	16317	20665	24830					D	22	0.361525	0.677831	1.05417					D	22	0.0946917	0.329218	0.805705		0.119122	0.0888766	0
D	23	Sample X95	15051	15389	15160					D	23	0.280929	0.302	0.28769					D	23	0	0	0		0	0	0
D	24	Sample X96	14822	16119	14520					D	24	0.266833	0.348613	0.248461					D	24	0	0	0		0	0	0
E	1	Sample X97	40011	44725	45189					E	1	3.75344	5.68331	5.93967					E	1	3.49898	5.43527	5.69965		0.0660947	0.275083	0
E	2	Sample X98	40408	45022	45914					E	2	3.88016	5.84557	6.37406					E	2	3.6656	5.5976	6.17282		0.143805	0.313403	0
E	3	Sample X99	39923	44812	48567					E	3	3.72603	5.73018	8.43326					E	3	3.47157	5.48214	8.19324		0.677773	0.590208	0
E	4	Sample X100	37530	46193	48235					E	4	3.06297	6.55338	8.12473					E	4	2.84841	6.3054	7.92349		0.404523	0.634385	0
E	5	Sample X101	35714	45293	49405					E	5	2.647	5.99935	9.29802					E	5	2.39254	5.75132	9.05799		0.826669	0.833181	0
E	6	Sample X102	32424	45593	47881					E	6	2.03293	6.17634	7.81438					E	6	1.81837	5.92836	7.61314		0.421195	0.724346	0
E	7	Sample X103	32987	45439	50930					E	7	2.1274	6.08458	11.2817					E	7	1.87294	5.83654	11.0417		1.30128	1.14609	0
E	8	Sample X104	26973	42226	44717					E	8	1.28478	4.53274	5.67902					E	8	1.07022	4.28477	5.47778		0.298253	0.550945	0
E	9	Sample X105	31802	45067	50058					E	9	1.93294	5.87072	10.0729					E	9	1.67848	5.62268	9.8329		1.05255	1.0193	0
E	10	Sample X106	23359	36602	42000					E	10	0.911479	2.84234	4.44444					E	10	0.69692	2.59436	4.2432		0.412211	0.443285	0
E	11	Sample X107	28459	42037	47819					E	11	1.4631	4.45875	7.76188					E	11	1.20864	4.21071	7.52186		0.827787	0.789152	0
E	12	Sample X108	18454	28744	34773					E	12	0.508713	1.49923	2.45501					E	12	0.294155	1.25125	2.25377		0.250628	0.244951	0
E	13	Sample X109	24753	36301	43727					E	13	1.0464	2.77448	5.18144					E	13	0.791944	2.52645	4.94141		0.603741	0.518683	0
E	14	Sample X110	16846	22217	27635					E	14	0.396603	0.808366	1.3622					E	14	0.182044	0.560389	1.16095		0.150141	0.122364	0
E	15	Sample X111	23923	35131	41522					E	15	0.964811	2.52634	4.2648					E	15	0.710355	2.2783	4.02478		0.436619	0.414303	0
E	16	Sample X112	14754	18425	21198					E	16	0.262675	0.506615	0.721483					E	16	0.0481164	0.258637	0.520241		0.0654009	0.0590156	0
E	17	Sample X113	19825	29488	34962					E	17	0.611388	1.59675	2.49241					E	17	0.356931	1.34871	2.25239		0.225919	0.236932	0
E	18	Sample X114	13984	15738	17755					E	18	0.216446	0.324093	0.45893					E	18	0.00188773	0.0761154	0.257687		0.045393	0.031975	0
E	19	Sample X115	18382	24133	28270					E	19	0.503508	0.985098	1.43949					E	19	0.249051	0.73706	1.19946		0.115601	0.118801	0
E	20	Sample X116	14457	14312	16114					E	20	0.244659	0.235948	0.348289					E	20	0.0301002	-0.0120293	0.147046		0.0397689	0.0146183	0
E	21	Sample X117	15969	19830	22335					E	21	0.338909	0.611775	0.818731					E	21	0.0844522	0.363737	0.578705		0.0537419	0.0617815	0
E	22	Sample X118	14360	15320	15288					E	22	0.238826	0.297672	0.29567					E	22	0.0242669	0.0496948	0.0944275		0.0111832	0.00877008	0
E	23	Sample X119	14619	14513	14380					E	23	0.254457	0.248038	0.240026					E	23	0	0	0		0	0	0
E	24	Sample X120	13952	14512	13725					E	24	0.214559	0.247977	0.201243					E	24	0	0	0		0	0	0
F	1	Sample X121	37454	38412	39947					F	1	3.04422	3.29025	3.73348					F	1	2.8579	3.09548	3.52756		0.108021	0.0837079	0
F	2	Sample X122	39425	43272	43862					F	2	3.57533	4.9725	5.24569					F	2	3.48111	4.7955	5.09655		0.0752622	0.201929	0
F	3	Sample X123	34543	36780	38855					F	3	2.41024	2.88329	3.41156					F	3	2.22392	2.68851	3.20564		0.129283	0.122716	0
F	4	Sample X124	38228	44035	45561					F	4	3.24132	5.32963	6.15711					F	4	3.1471	5.15262	6.00796		0.213835	0.357608	0
F	5	Sample X125	28616	34221	37354					F	5	1.48292	2.34891	3.01974					F	5	1.2966	2.15413	2.81382		0.164922	0.189653	0
F	6	Sample X126	32778	42632	44357					F	6	2.09187	4.69714	5.49079					F	6	1.99765	4.52014	5.34165		0.205377	0.417999	0
F	7	Sample X127	24143	27854	30729					F	7	0.98607	1.38851	1.77044					F	7	0.799746	1.19373	1.56452		0.0926969	0.0955964	0
F	8	Sample X128	28360	41261	44961					F	8	1.4507	4.17058	5.81172					F	8	1.35647	3.99358	5.66258		0.41725	0.538263	0
F	9	Sample X129	20112	22537	26649					F	9	0.633775	0.836625	1.24801					F	9	0.447451	0.641847	1.04209		0.100062	0.0743302	0
F	10	Sample X130	21653	31983	36428					F	10	0.759707	1.96158	2.8029					F	10	0.665485	1.78457	2.65375		0.217295	0.248534	0
F	11	Sample X131	16173	17673	20545					F	11	0.352123	0.453198	0.668166					F	11	0.1658	0.258419	0.462246		0.0509566	0.0370557	0
F	12	Sample X132	18223	26082	31909					F	12	0.492077	1.18536	1.94982					F	12	0.397855	1.00836	1.80068		0.19808	0.175353	0
F	13	Sample X133	14654	15821	17096					F	13	0.256583	0.329399	0.413481					F	13	0.0702593	0.13462	0.207561		0.0182352	0.0171627	0
F	14	Sample X134	15468	20500	25839					F	14	0.30697	0.664557	1.15914					F	14	0.212748	0.487553	1.01		0.130611	0.099656	0
F	15	Sample X135	14205	14309	15207					F	15	0.229556	0.235769	0.290615					F	15	0.0432322	0.0409899	0.0846941		0.010926	0.00518273	0
F	16	Sample X136	14481	17800	20264					F	16	0.246106	0.462085	0.645762					F	16	0.151884	0.285082	0.496615		0.0528833	0.0430914	0
F	17	Sample X137	13310	13496	14196					F	17	0.177233	0.187941	0.229019					F	17	-0.00909058	-0.00683777	0.0230987		0.00748413	0.00402367	0
F	18	Sample X138	13504	15531	16905					F	18	0.188403	0.310947	0.400569					F	18	0.0941812	0.133943	0.251422		0.0293695	0.019655	0
F	19	Sample X139	13505	13689	13974					F	19	0.188461	0.199143	0.215856					F	19	0.00213773	0.00436416	0.0099357		0.00139289	0.000974746	0
F	20	Sample X140	14738	14282	15301					F	20	0.261699	0.234153	0.296483					F	20	0.167476	0.0571494	0.147336		0.0225467	-0.00251753	0
F	21	Sample X141	13005	13229	13307					F	21	0.159857	0.172596	0.177061					F	21	-0.026466	-0.0221823	-0.0288598		-0.00166936	-0.000299224	0
F	22	Sample X142	12822	13917	13992					F	22	0.14954	0.212497	0.216919					F	22	0.0553179	0.0354935	0.0677718		0.00806957	0.00155674	0
F	23	Sample X143	13468	13614	13805					F	23	0.186323	0.194779	0.205921					F	23	0	0	0		0	0	0
F	24	Sample X144	11816	13306	12815					F	24	0.0942221	0.177003	0.149147					F	24	0	0	0		0	0	0
G	1	Sample X145	31091	37685	39303					G	1	1.82391	3.10161	3.53952					G	1	1.76982	3.04522	3.48365		0.109608	0.214229	0
G	2	Sample X146	35000	41509	41792					G	2	2.5	4.26005	4.36511					G	2	2.43274	4.21634	4.35628		0.0349846	0.240443	0
G	3	Sample X147	33333	41083	42864					G	3	2.18744	4.10781	4.79458					G	3	2.13335	4.05142	4.73871		0.171824	0.325671	0
G	4	Sample X148	34211	42136	42794					G	4	2.34703	4.49731	4.76491					G	4	2.27977	4.45361	4.75608		0.0756161	0.309539	0
G	5	Sample X149	31439	39514	41433					G	5	1.8766	3.60173	4.23237					G	5	1.8225	3.54533	4.1765		0.157792	0.29425	0
G	6	Sample X150	32766	43002	43138					G	6	2.08985	4.85381	4.91312					G	6	2.02259	4.81011	4.90429		0.0235454	0.360212	0
G	7	Sample X151	31015	40239	42748					G	7	1.81258	3.82559	4.74554					G	7	1.75848	3.7692	4.68967		0.230117	0.366398	0
G	8	Sample X152	28391	40392	39600					G	8	1.45457	3.87495	3.62745					G	8	1.38731	3.83125	3.61862		-0.0531571	0.278914	0
G	9	Sample X153	29580	39068	41706					G	9	1.60914	3.47172	4.33284					G	9	1.55504	3.41532	4.27697		0.215412	0.340241	0
G	10	Sample X154	22311	34969	39010					G	10	0.816618	2.49381	3.45522					G	10	0.749355	2.45011	3.44639		0.24907	0.337129	0
G	11	Sample X155	27004	37224	41061					G	11	1.28834	2.98823	4.10014					G	11	1.23424	2.93184	4.04427		0.278107	0.351253	0
G	12	Sample X156	18311	29086	33938					G	12	0.498393	1.54348	2.29626					G	12	0.431131	1.49977	2.28742		0.196912	0.232037	0
G	13	Sample X157	23702	32526	39297					G	13	0.943716	2.04976	3.53777					G	13	0.88962	1.99336	3.4819		0.372135	0.324035	0
G	14	Sample X158	14753	21329	29638					G	14	0.262614	0.732396	1.61699					G	14	0.195352	0.688696	1.60816		0.229865	0.176601	0
G	15	Sample X159	21936	31332	35747					G	15	0.783943	1.86026	2.654					G	15	0.729847	1.80387	2.59813		0.198565	0.233535	0
G	16	Sample X160	13055	18064	24502					G	16	0.16269	0.480733	1.02133					G	16	0.0954281	0.437032	1.01249		0.143866	0.114633	0
G	17	Sample X161	17796	26846	31402					G	17	0.461805	1.27028	1.87094					G	17	0.407709	1.21389	1.81506		0.150293	0.175919	0
G	18	Sample X162	12715	14868	19382					G	18	0.143544	0.269653	0.577453					G	18	0.0762822	0.225953	0.568622		0.0856674	0.0615425	0
G	19	Sample X163	15742	21929	25487					G	19	0.324348	0.783339	1.12182					G	19	0.270252	0.726945	1.06595		0.0847518	0.0994625	0
G	20	Sample X164	11181	12563	15676					G	20	0.0604785	0.135074	0.320143					G	20	-0.00678377	0.0913731	0.311312		0.0549846	0.0397619	0
G	21	Sample X165	13885	18389	21365					G	21	0.210615	0.504013	0.735408					G	21	0.156519	0.447619	0.679537		0.0579794	0.0653772	0
G	22	Sample X166	11377	12885	13820					G	22	0.0707998	0.153083	0.206799					G	22	0.00353756	0.109382	0.197968		0.0221466	0.0243039	0
G	23	Sample X167	11059	11103	11093					G	23	0.0540957	0.0563941	0.0558713					G	23	0	0	0		0	0	0
G	24	Sample X168	11310	10859	10176					G	24	0.0672623	0.0437008	0.00883109					G	24	0	0	0		0	0	0
H	1	Sample X169	21505	28270	33519					H	1	0.747175	1.43949	2.22037					H	1	0.309247	1.01168	1.84422		0.208137	0.191872	0
H	2	Sample X170	20316	28085	33404					H	2	0.649884	1.41665	2.19995					H	2	0.384887	1.09689	1.92637		0.207369	0.192685	0
H	3	Sample X171	22771	31193	36783					H	3	0.857598	1.83922	2.88399					H	3	0.41967	1.41141	2.50784		0.274108	0.261022	0
H	4	Sample X172	19335	27066	32820					H	4	0.573896	1.29547	2.09897					H	4	0.308899	0.975709	1.82538		0.212419	0.189561	0
H	5	Sample X173	26665	34854	39433					H	5	1.24981	2.47097	3.5777					H	5	0.811885	2.04316	3.20156		0.289599	0.298709	0
H	6	Sample X174	18466	25290	30537					H	6	0.509583	1.10127	1.74261					H	6	0.244585	0.781507	1.46902		0.171879	0.153055	0
H	7	Sample X175	24124	35333	39929					H	7	0.984223	2.5675	3.72789					H	7	0.546296	2.13969	3.35175		0.303015	0.350682	0
H	8	Sample X176	16212	20308	24105					H	8	0.354663	0.649249	0.982379					H	8	0.089666	0.329488	0.708793		0.0948261	0.0773908	0
H	9	Sample X177	26226	32108	35942					H	9	1.20107	1.98157	2.69578					H	9	0.763144	1.55376	2.31964		0.191469	0.194561	0
H	10	Sample X178	14915	16592	19352					H	10	0.272541	0.379654	0.575182					H	10	0.00754341	0.0598926	0.301595		0.0604257	0.0367565	0
H	11	Sample X179	23268	29328	38216					H	11	0.903027	1.57538	3.23816					H	11	0.4651	1.14757	2.86201		0.428612	0.299614	0
H	12	Sample X180	13589	15911	17438					H	12	0.193327	0.335174	0.436892					H	12	-0.0716703	0.0154134	0.163305		0.036973	0.029372	0
H	13	Sample X181	22672	31697	40444					H	13	0.848693	1.91649	3.8919					H	13	0.410765	1.48868	3.51576		0.506769	0.388124	0
H	14	Sample X182	13693	15305	15899					H	14	0.199376	0.296733	0.334403					H	14	-0.0656214	-0.0230275	0.0608163		0.0209609	0.0158047	0
H	15	Sample X183	21771	30710	36781					H	15	0.769769	1.76767	2.88352					H	15	0.331842	1.33986	2.50738		0.291881	0.271942	0
H	16	Sample X184	13748	14338	14759					H	16	0.202586	0.237506	0.26298					H	16	-0.0624115	-0.0822549	-0.0106061		0.0179122	0.00647568	0
H	17	Sample X185	18929	25434	31411					H	17	0.54351	1.11627	1.87231					H	17	0.105583	0.688458	1.49617		0.201928	0.173823	0
H	18	Sample X186	13507	16078	14990					H	18	0.188577	0.345954	0.277161					H	18	-0.0764206	0.0261933	0.00357405		-0.00565481	0.00999933	0
H	19	Sample X187	21692	26690	29274					H	19	0.763026	1.25263	1.56822					H	19	0.325099	0.824815	1.19207		0.0918148	0.108372	0
H	20	Sample X188	14038	15070	14569					H	20	0.219638	0.282105	0.251425					H	20	-0.0453594	-0.0376554	-0.0221613		0.00387351	0.00289976	0
H	21	Sample X189	19229	22345	24484					H	21	0.565905	0.819612	1.01954					H	21	0.127977	0.3918	0.643399		0.0628996	0.0644277	0
H	22	Sample X190	15403	14807	15706					H	22	0.302879	0.265915	0.322053					H	22	0.0378818	-0.0538458	0.0484661		0.025578	0.00132304	0
H	23	Sample X191	17453	17306	16539					H	23	0.437927	0.427812	0.376142					H	23	0	0	0		0	0	0
H	24	Sample X192	14792	15670	14932					H	24	0.264997	0.319761	0.273587					H	24	0	0	0		0	0	0
I	1	Sample X193	21221	27135	31415					I	1	0.723394	1.30344	1.87292					I	1	0.49199	1.05437	1.62386		0.142371	0.141484	0
I	2	Sample X194	25123	35645	41304					I	2	1.08402	2.63242	4.18592					I	2	0.851903	2.37011	3.94241		0.393075	0.386313	0
I	3	Sample X195	21543	28249	33128					I	3	0.750384	1.43688	2.15168					I	3	0.518979	1.18782	1.90262		0.1787	0.172955	0
I	4	Sample X196	23806	34380	40603					I	4	0.953611	2.379	3.9443					I	4	0.72149	2.11669	3.70078		0.396022	0.372411	0
I	5	Sample X197	21631	29086	34473					I	5	0.757838	1.54348	2.39678					I	5	0.526434	1.29441	2.14771		0.213325	0.20266	0
I	6	Sample X198	20789	30013	35737					I	6	0.687881	1.66847	2.65188					I	6	0.45576	1.40616	2.40836		0.25055	0.244075	0
I	7	Sample X199	24138	29766	36247					I	7	0.985584	1.63442	2.76249					I	7	0.754179	1.38535	2.51343		0.282019	0.219906	0
I	8	Sample X200	18786	25579	30828					I	8	0.53295	1.1315	1.78493					I	8	0.300829	0.869195	1.54142		0.168055	0.155073	0
I	9	Sample X201	21120	30094	35601					I	9	0.715021	1.67976	2.62316					I	9	0.483616	1.4307	2.3741		0.235849	0.23631	0
I	10	Sample X202	17589	20783	24330					I	10	0.447349	0.687393	1.00435					I	10	0.215228	0.425084	0.760831		0.0839367	0.0682004	0
I	11	Sample X203	21220	30043	35817					I	11	0.723311	1.67265	2.66892					I	11	0.491906	1.42358	2.41985		0.249068	0.240994	0
I	12	Sample X204	15669	17792	22856					I	12	0.319697	0.461524	0.865281					I	12	0.0875763	0.199215	0.621767		0.105638	0.0667738	0
I	13	Sample X205	22648	29136	36079					I	13	0.846541	1.55003	2.72553					I	13	0.615136	1.30096	2.47647		0.293877	0.232667	0
I	14	Sample X206	15990	18805	18225					I	14	0.340264	0.534349	0.49222					I	14	0.108143	0.27204	0.248706		-0.00583352	0.0175704	0
I	15	Sample X207	17665	24800	30060					I	15	0.45264	1.05114	1.67502					I	15	0.221235	0.802071	1.42595		0.15597	0.15059	0
I	16	Sample X208	16568	16405	15349					I	16	0.378062	0.367301	0.299489					I	16	0.145941	0.104992	0.055975		-0.0122544	-0.0112458	0
I	17	Sample X209	18601	24250	31127					I	17	0.519397	0.996503	1.8293					I	17	0.287992	0.747438	1.58024		0.2082	0.161531	0
I	18	Sample X210	14744	15362	15091					I	18	0.262065	0.300305	0.283406					I	18	0.0299437	0.0379958	0.0398921		0.000474072	0.00124355	0
I	19	Sample X211	16314	19913	23346					I	19	0.361329	0.618218	0.910269					I	19	0.129924	0.369153	0.661204		0.0730128	0.06641	0
I	20	Sample X212	13878	14073	14456					I	20	0.210203	0.221711	0.244599					I	20	-0.0219176	-0.0405983	0.0010843		0.0104207	0.00287524	0
I	21	Sample X213	15496	18075	20387					I	21	0.308736	0.481515	0.65553					I	21	0.0773317	0.232449	0.406464		0.0435038	0.0411416	0
I	22	Sample X214	15291	15032	15077					I	22	0.295858	0.279754	0.282539					I	22	0.0637367	0.0174456	0.0390247		0.00539476	-0.003089	0
I	23	Sample X215	14236	14530	14530					I	23	0.231405	0.249065	0.249065					I	23	0	0	0		0	0	0
I	24	Sample X216	14248	14748	14438					I	24	0.232121	0.262309	0.243514					I	24	0	0	0		0	0	0
J	1	Sample X217	19640	24749	29239					J	1	0.597126	1.046	1.56359					J	1	0.304828	0.765626	1.27484		0.127304	0.121252	0
J	2	Sample X218	21274	26891	33231					J	2	0.727806	1.27541	2.16958					J	2	0.50396	1.03292	1.94478		0.227967	0.180103	0
J	3	Sample X219	19428	26050	30815					J	3	0.580943	1.18189	1.78302					J	3	0.288645	0.901512	1.49428		0.148191	0.150704	0
J	4	Sample X220	19686	25221	29210					J	4	0.60066	1.09412	1.55976					J	4	0.376814	0.851632	1.33496		0.120833	0.119769	0
J	5	Sample X221	22038	28918	33545					J	5	0.792766	1.52162	2.225					J	5	0.500469	1.24125	1.93626		0.173753	0.179474	0
J	6	Sample X222	16934	23975	27267					J	6	0.402522	0.969813	1.31878					J	6	0.178676	0.727322	1.09398		0.0916647	0.114413	0
J	7	Sample X223	21178	27655	34729					J	7	0.719824	1.36458	2.44638					J	7	0.427526	1.08421	2.15763		0.268356	0.216264	0
J	8	Sample X224	15384	18806	22334					J	8	0.301685	0.534422	0.818643					J	8	0.0778399	0.291931	0.593847		0.0754789	0.0645009	0
J	9	Sample X225	20588	28934	35012					J	9	0.671623	1.52369	2.5024					J	9	0.379325	1.24332	2.21365		0.242584	0.229291	0
J	10	Sample X226	14672	17143	19238					J	10	0.257677	0.416676	0.566582					J	10	0.0338317	0.174185	0.341786		0.0419002	0.0384943	0
J	11	Sample X227	20419	28269	35193					J	11	0.658081	1.43937	2.5389					J	11	0.365783	1.15899	2.25015		0.27279	0.235546	0
J	12	Sample X228	13369	15911	16532					J	12	0.18062	0.335174	0.375679					J	12	-0.0432254	0.0926832	0.150883		0.0145499	0.0242636	0
J	13	Sample X229	21954	28484	34015					J	13	0.785497	1.46624	2.31047					J	13	0.493199	1.18587	2.02172		0.208964	0.191065	0
J	14	Sample X230	13405	14529	15628					J	14	0.182691	0.249005	0.317092					J	14	-0.0411544	0.0065138	0.0922962		0.0214456	0.0166813	0
J	15	Sample X231	18648	23339	29095					J	15	0.522828	0.909618	1.54465					J	15	0.230531	0.629245	1.25591		0.156665	0.128172	0
J	16	Sample X232	13870	14939	15356					J	16	0.209733	0.274017	0.299928					J	16	-0.0141123	0.0315264	0.0751327		0.0109016	0.0111556	0
J	17	Sample X233	15984	20288	24135					J	17	0.339876	0.647663	0.985292					J	17	0.0475787	0.36729	0.696545		0.0823137	0.0811208	0
J	18	Sample X234	14842	14467	14757					J	18	0.268059	0.245262	0.262858					J	18	0.0442132	0.00277062	0.0380627		0.00882302	-0.00076881	0
J	19	Sample X235	15830	19030	21848					J	19	0.329975	0.551013	0.776368					J	19	0.0376774	0.27064	0.487621		0.0542453	0.056243	0
J	20	Sample X236	15442	15598	16259					J	20	0.305332	0.315189	0.357731					J	20	0.0814867	0.0726974	0.132935		0.0150594	0.00643104	0
J	21	Sample X237	14898	16848	18617					J	21	0.271496	0.396737	0.520564					J	21	-0.020802	0.116364	0.231817		0.0288632	0.0315774	0
J	22	Sample X238	13793	14880	14290					J	22	0.205218	0.27039	0.234631					J	22	-0.0186278	0.027899	0.00983573		-0.00451582	0.00355794	0
J	23	Sample X239	15234	15042	15177					J	23	0.292298	0.280373	0.288747					J	23	0	0	0		0	0	0
J	24	Sample X240	14109	14421	14125					J	24	0.223846	0.242491	0.224796					J	24	0	0	0		0	0	0
K	1	Sample X241	26327	33899	38545					K	1	1.21217	2.28909	3.32615					K	1	0.95206	1.99779	3.01993		0.255536	0.258484	0
K	2	Sample X242	47835	57060	58233					K	2	7.77538	40.017	68.2414					K	2	7.41097	39.6283	67.9995		7.09279	7.57356	1
K	3	Sample X243	25338	33795	39267					K	3	1.10625	2.27008	3.52904					K	3	0.846142	1.97878	3.22282		0.31101	0.297085	0
K	4	Sample X244	46189	57312	59166					K	4	6.55076	44.003	147.38					K	4	6.18635	43.6143	147.138		25.881	17.619	1
K	5	Sample X245	27434	36527	41828					K	5	1.33836	2.82527	4.37871					K	5	1.07825	2.53397	4.0725		0.384633	0.374282	0
K	6	Sample X246	41171	54348	57501					K	6	4.1387	19.6161	47.52					K	6	3.77429	19.2274	47.2781		7.01269	5.43798	1
K	7	Sample X247	24654	37447	42494					K	7	1.03647	3.0425	4.64041					K	7	0.776355	2.7512	4.33419		0.395749	0.44473	0
K	8	Sample X248	34985	50546	55526					K	8	2.497	10.7219	25.4392					K	8	2.13259	10.3332	25.1973		3.71603	2.88309	1
K	9	Sample X249	24663	35961	42491					K	9	1.03737	2.69988	4.63919					K	9	0.777256	2.40858	4.33297		0.481097	0.444464	0
K	10	Sample X250	25425	44186	49805					K	10	1.11533	5.40439	9.76091					K	10	0.750919	5.01568	9.51902		1.12583	1.09601	0
K	11	Sample X251	25139	34724	42507					K	11	1.08567	2.4454	4.64572					K	11	0.825556	2.1541	4.3395		0.54635	0.439243	0
K	12	Sample X252	20298	32715	40187					K	12	0.648456	2.08127	3.80899					K	12	0.284046	1.69257	3.5671		0.468633	0.410382	0
K	13	Sample X253	22902	32757	40349					K	13	0.869454	2.08833	3.861					K	13	0.609341	1.79703	3.55479		0.439438	0.368181	0
K	14	Sample X254	17359	25739	32373					K	14	0.431451	1.14846	2.02456					K	14	0.0670407	0.759759	1.78267		0.255728	0.214454	0
K	15	Sample X255	20780	28937	36062					K	15	0.687149	1.52408	2.72182					K	15	0.427036	1.23278	2.41561		0.295707	0.248572	0
K	16	Sample X256	14884	20070	24867					K	16	0.270636	0.630478	1.05791					K	16	-0.0937746	0.241774	0.816019		0.143561	0.113724	0
K	17	Sample X257	18755	25349	30078					K	17	0.53067	1.1074	1.67753					K	17	0.270557	0.816099	1.37131		0.138804	0.137595	0
K	18	Sample X258	14233	17123	19329					K	18	0.231226	0.415316	0.573443					K	18	-0.133185	0.0266119	0.331554		0.0762354	0.0580923	0
K	19	Sample X259	16741	20677	24034					K	19	0.389572	0.678801	0.975505					K	19	0.129459	0.387501	0.669291		0.0704474	0.0674789	0
K	20	Sample X260	14061	15269	16825					K	20	0.221	0.294483	0.395194					K	20	-0.143411	-0.0942214	0.153304		0.0618815	0.0370894	0
K	21	Sample X261	17936	22867	25156					K	21	0.471662	0.866278	1.08742					K	21	0.211549	0.574978	0.781204		0.0515566	0.0712069	0
K	22	Sample X262	14085	15057	15729					K	22	0.222422	0.281301	0.323519					K	22	-0.141988	-0.107403	0.0816293		0.0472581	0.0279522	0
K	23	Sample X263	14712	15218	15456					K	23	0.260113	0.2913	0.306214					K	23	0	0	0		0	0	0
K	24	Sample X264	16361	16728	14411					K	24	0.36441	0.388704	0.241889					K	24	0	0	0		0	0	0
L	1	Sample X265	51046	55922	57305					L	1	11.4602	28.1523	43.8822					L	1	11.2288	27.903	43.6215		3.92962	4.04909	1
L	2	Sample X266	56482	60624	60292					L	2	33.0316	-202.821	-430.582					L	2	32.815	-203.038	-430.782		-56.9359	-57.9496	1
L	3	Sample X267	49555	56854	58645					L	3	9.46745	37.233	89.7509					L	3	9.23598	36.9837	89.4902		13.1266	10.0318	1
L	4	Sample X268	53243	60472	61193					L	4	15.9993	-267.331	-107.278					L	4	15.7828	-267.548	-107.477		40.0177	-15.4075	1
L	5	Sample X269	47704	55335	57142					L	5	7.66591	24.2953	41.2369					L	5	7.43444	24.046	40.9762		4.23254	4.19271	1
L	6	Sample X270	47143	58241	60736					L	6	7.22233	68.5631	-172.337					L	6	7.00582	68.3454	-172.537		-60.2205	-22.4428	1
L	7	Sample X271	47290	55738	57517					L	7	7.33478	26.829	47.8423					L	7	7.10331	26.5796	47.5816		5.25049	5.05979	1
L	8	Sample X272	40515	53298	56755					L	8	3.91519	16.1511	36.0208					L	8	3.69869	15.9335	35.8212		4.97193	4.01531	1
L	9	Sample X273	44037	54063	56747					L	9	5.33061	18.5544	35.9261					L	9	5.09914	18.3051	35.6653		4.34006	3.82078	1
L	10	Sample X274	32449	46977	54246					L	10	2.03704	7.0984	19.224					L	10	1.82053	6.88072	19.0244		3.03592	2.15048	1
L	11	Sample X275	39876	51800	56920					L	11	3.71149	12.7439	38.0844					L	11	3.48002	12.4946	37.8237		6.33227	4.29296	1
L	12	Sample X276	23094	37026	44162					L	12	0.886983	2.94093	5.39241					L	12	0.670478	2.72325	5.1928		0.617389	0.56529	0
L	13	Sample X277	35608	47924	52864					L	13	2.62463	7.85111	15.0168					L	13	2.39317	7.6018	14.7561		1.78857	1.54537	1
L	14	Sample X278	18437	29222	35154					L	14	0.507483	1.56134	2.53099					L	14	0.290977	1.34366	2.33138		0.246931	0.255051	0
L	15	Sample X279	30667	43347	48503					L	15	1.76141	5.00616	8.3724					L	15	1.52995	4.75685	8.11168		0.838708	0.822716	0
L	16	Sample X280	16293	22738	27389					L	16	0.359954	0.854624	1.33306					L	16	0.143448	0.636937	1.13345		0.124129	0.123751	0
L	17	Sample X281	25483	37001	42455					L	17	1.1214	2.93502	4.62454					L	17	0.88994	2.68571	4.36381		0.419526	0.434234	0
L	18	Sample X282	14956	18413	22642					L	18	0.275064	0.505747	0.846004					L	18	0.0585589	0.28806	0.646394		0.0895835	0.0734794	0
L	19	Sample X283	21784	30734	35937					L	19	0.770881	1.77117	2.6947					L	19	0.539417	1.52186	2.43397		0.228028	0.23682	0
L	20	Sample X284	13303	16049	21116					L	20	0.176831	0.344076	0.71469					L	20	-0.039674	0.12639	0.515081		0.0971728	0.0693443	0
L	21	Sample X285	19665	26771	30880					L	21	0.599045	1.26177	1.79258					L	21	0.367581	1.01247	1.53186		0.129848	0.145535	0
L	22	Sample X286	17123	15836	17158					L	22	0.415316	0.33036	0.417698					L	22	0.19881	0.112673	0.218088		0.0263539	0.00240976	0
L	23	Sample X287	14237	14534	14722					L	23	0.231464	0.249307	0.260723					L	23	0	0	0		0	0	0
L	24	Sample X288	13985	14005	13697					L	24	0.216505	0.217687	0.199609					L	24	0	0	0		0	0	0
M	1	Sample X289	33510	43175	47405					M	1	2.21876	4.92942	7.42457					M	1	2.02885	4.72794	7.22467		0.624182	0.649477	0
M	2	Sample X290	51136	56096	56547					M	2	11.602	29.5184	33.7004					M	2	11.4272	29.3461	33.5366		1.04764	2.76368	1
M	3	Sample X291	32465	42711	47359					M	3	2.03968	4.73003	7.38846					M	3	1.84977	4.52855	7.18856		0.665001	0.667349	0
M	4	Sample X292	50440	58336	58626					M	4	10.5753	72.6202	88.4753					M	4	10.4005	72.4478	88.3115		3.96592	9.73887	1
M	5	Sample X293	34760	41900	48191					M	5	2.45246	4.40608	8.08515					M	5	2.26255	4.2046	7.88525		0.920161	0.702837	0
M	6	Sample X294	40853	50391	52553					M	6	4.02844	10.5086	14.2853					M	6	3.85367	10.3363	14.1215		0.946311	1.28348	1
M	7	Sample X295	32407	43215	47410					M	7	2.03013	4.94713	7.42851					M	7	1.84023	4.74565	7.22861		0.620741	0.673548	0
M	8	Sample X296	36837	49437	52740					M	8	2.89654	9.33376	14.7176					M	8	2.72177	9.16139	14.5539		1.34812	1.47901	1
M	9	Sample X297	30763	41273	46755					M	9	1.7754	4.17485	6.93752					M	9	1.5855	3.97338	6.73762		0.691061	0.644016	0
M	10	Sample X298	30779	42829	49084					M	10	1.77775	4.77972	8.95108					M	10	1.60298	4.60735	8.78731		1.04499	0.898042	0
M	11	Sample X299	29965	42804	47874					M	11	1.66181	4.76913	7.80843					M	11	1.4719	4.56766	7.60853		0.760218	0.767078	0
M	12	Sample X300	22784	34808	40909					M	12	0.85877	2.46189	4.04759					M	12	0.684001	2.28952	3.88382		0.398574	0.399977	0
M	13	Sample X301	26509	37855	44069					M	13	1.23235	3.14462	5.34634					M	13	1.04244	2.94314	5.14644		0.550824	0.513	0
M	14	Sample X302	18718	27971	33434					M	14	0.527954	1.40271	2.20526					M	14	0.353185	1.23035	2.04149		0.202787	0.211039	0
M	15	Sample X303	24010	34207	40071					M	15	0.973187	2.34628	3.77227					M	15	0.78328	2.1448	3.57237		0.356891	0.348636	0
M	16	Sample X304	15395	22072	26436					M	16	0.302376	0.795718	1.22423					M	16	0.127607	0.62335	1.06046		0.109277	0.116607	0
M	17	Sample X305	22055	31127	36615					M	17	0.794242	1.8293	2.84531					M	17	0.604334	1.62783	2.64541		0.254395	0.255134	0
M	18	Sample X306	14000	17662	20734					M	18	0.217391	0.45243	0.683416					M	18	0.0426219	0.280063	0.519647		0.0598961	0.0596282	0
M	19	Sample X307	18495	25435	29777					M	19	0.511685	1.11637	1.63592					M	19	0.321778	0.914899	1.43602		0.130281	0.139281	0
M	20	Sample X308	13609	15433	17039					M	20	0.194488	0.304766	0.409616					M	20	0.0197187	0.132398	0.245847		0.0283623	0.0282661	0
M	21	Sample X309	16996	21666	24640					M	21	0.406706	0.760813	1.03507					M	21	0.216799	0.559337	0.835167		0.0689576	0.077296	0
M	22	Sample X310	13136	14248	14973					M	22	0.167293	0.232121	0.276112					M	22	-0.00747684	0.0597533	0.112344		0.0131476	0.0149776	0
M	23	Sample X311	13530	13729	13702					M	23	0.189907	0.201476	0.199901					M	23	0	0	0		0	0	0
M	24	Sample X312	13267	13225	13074					M	24	0.174769	0.172368	0.163768					M	24	0	0	0		0	0	0
N	1	Sample X313	39503	43594	44832					N	1	3.59845	5.11916	5.74103					N	1	3.51645	5.02677	5.65497		0.15705	0.267315	0
N	2	Sample X314	40162	42654	42926					N	2	3.80104	4.70627	4.82107					N	2	3.77446	4.57109	4.66607		0.0237467	0.111452	0
N	3	Sample X315	40262	44941	45368					N	3	3.83296	5.80068	6.04292					N	3	3.75096	5.70829	5.95686		0.0621411	0.275737	0
N	4	Sample X316	43128	46750	47461					N	4	4.90872	6.93396	7.4689					N	4	4.88214	6.79878	7.3139		0.12878	0.303969	0
N	5	Sample X317	38033	42623	43529					N	5	3.19035	4.69342	5.0891					N	5	3.10835	4.60102	5.00303		0.100502	0.236835	0
N	6	Sample X318	46673	50156	48346					N	6	6.87946	10.1981	8.22593					N	6	6.85288	10.0629	8.07093		-0.497993	0.152257	0
N	7	Sample X319	38244	45262	46219					N	7	3.24554	5.98148	6.57046					N	7	3.16354	5.88908	6.4844		0.148828	0.415107	0
N	8	Sample X320	34424	43550	44887					N	8	2.38739	5.09878	5.77102					N	8	2.36081	4.9636	5.61603		0.163107	0.406901	0
N	9	Sample X321	35524	42442	44515					N	9	2.60704	4.61926	5.57233					N	9	2.52504	4.52687	5.48626		0.239849	0.370153	0
N	10	Sample X322	26440	36674	40154					N	10	1.22467	2.85883	3.7985					N	10	1.19809	2.72364	3.6435		0.229964	0.305676	0
N	11	Sample X323	32478	40291	42519					N	11	2.04182	3.84228	4.65062					N	11	1.95982	3.74989	4.56456		0.203667	0.325592	0
N	12	Sample X324	20965	31301	36231					N	12	0.702254	1.85555	2.75895					N	12	0.675675	1.72037	2.60395		0.220896	0.241035	0
N	13	Sample X325	27571	37126	40445					N	13	1.35457	2.96472	3.89223					N	13	1.27257	2.87233	3.80616		0.233459	0.316699	0
N	14	Sample X326	15085	23211	28369					N	14	0.283035	0.897755	1.45182					N	14	0.256455	0.76257	1.29682		0.133563	0.130046	0
N	15	Sample X327	23759	32873	36790					N	15	0.949132	2.10796	2.88561					N	15	0.867128	2.01556	2.79955		0.195996	0.241552	0
N	16	Sample X328	12624	17748	21882					N	16	0.138467	0.45844	0.779291					N	16	0.111887	0.323255	0.624292		0.0752592	0.0640506	0
N	17	Sample X329	19446	27154	31588					N	17	0.58231	1.30564	1.89955					N	17	0.500306	1.21325	1.81349		0.15006	0.164147	0
N	18	Sample X330	11111	14298	16734					N	18	0.0568124	0.23511	0.389105					N	18	0.0302328	0.0999251	0.234106		0.0335452	0.0254841	0
N	19	Sample X331	16822	22366	25591					N	19	0.394993	0.821465	1.13277					N	19	0.312988	0.729072	1.04671		0.0794086	0.0917147	0
N	20	Sample X332	10993	12964	14206					N	20	0.050656	0.157539	0.229615					N	20	0.0240764	0.0223539	0.0746164		0.0130656	0.0063175	0
N	21	Sample X333	14220	18147	20061					N	21	0.23045	0.486644	0.629773					N	21	0.148446	0.394251	0.543709		0.0373645	0.0494079	0
N	22	Sample X334	10527	11514	12236					N	22	0.0266307	0.0780638	0.117034					N	22	5.10699e-05	-0.0571212	-0.0379651		0.00478903	-0.00475202	0
N	23	Sample X335	11588	11782	11664					N	23	0.0820045	0.0923929	0.0860642					N	23	0	0	0		0	0	0
N	24	Sample X336	10526	12565	12919					N	24	0.0265796	0.135185	0.154999					N	24	0	0	0		0	0	0
						#DIV/0!	#DIV/0!	24
						#DIV/0!	#DIV/0!	12
						#DIV/0!	#DIV/0!	6
						#DIV/0!	#DIV/0!	3
						#DIV/0!	#DIV/0!	1.5
						#DIV/0!	#DIV/0!	0.75
						#DIV/0!	#DIV/0!	0.375
						#DIV/0!	#DIV/0!	0.1875
						#DIV/0!	#DIV/0!	0.09375
						#DIV/0!	#DIV/0!	0.046875
						#DIV/0!	#DIV/0!	0.0234375
						#DIV/0!	#DIV/0!	0
[truncated: 11 more columns]
