# Supplementary material for: PDZ-directed substrate recruitment is the primary determinant of specific 4E-BP1 dephosphorylation by PP1-Neurabin
Source: eLife journal article supplement (doi:10.7554/elife.103403), 2024-11-20
Supplement: fig5-data1 [file replicate2.xlsx]

## Sheet: All Cycles
Well Row	Well Col	Content	Raw Data (425-10/460-20)	Raw Data (425-10/460-20)	Raw Data (425-10/460-20)	Raw Data (425-10/460-20)	Raw Data (425-10/460-20)		convert to phosphate	Well Row	Well Col	Raw Data (425-10/460-20)	Raw Data (425-10/460-20)	Raw Data (425-10/460-20)	Raw Data (425-10/460-20)	Raw Data (425-10/460-20)		normalize to the lasst column	Well Row	Well Col	Raw Data (425-10/460-20)	Raw Data (425-10/460-20)	Raw Data (425-10/460-20)	Raw Data (425-10/460-20)	Raw Data (425-10/460-20)						PP1-Neb 1 nM																PP1-Ph1 2.5 nM
		Time [s]	0	240	480	720	960					0	4	8	12	16					0	4	8	12	16						V1	V2	V3	V4	V5	V6	V7	P1	P2	P3	P4	P5	P6	P7	P8		V1	V2	V3
A	1	Sample X1	29913	38945	43142	46079	48297			A	1	0.986559	1.89429	2.54997	3.16528	3.75803			A	1	1.16812	2.08097	2.73901	3.35434	3.94709	0.228212	0			400	0.228212	0.0241748	0.021921	0.0177977	0.0441697	0.290989	0.0808879	0.043401	0.00819205	0.109131	0.0261076	0.0720032	0.0550586	0.00917297	0.00393308		0.507755	0.0463767	0.0528382
A	2	Sample X2	37619	48181	50256	51769	53462			A	2	1.72607	3.72356	4.41216	5.03254	5.89111			A	2	1.64515	3.67617	4.38745	4.99389	5.8546	0.507755	0			200	0.309336	0.0210946	0.0234912	0.0196786	0.0430565	0.251032	0.0604999	0.0528832	0.000748802	0.0955008	0.0133572	0.0237183	-0.00465928	0.00629528	0.00168025		0.416108	0.030376	0.035684
A	3	Sample X3	30693	41572	46622	49889	51161			A	3	1.04713	2.27936	3.29846	4.27821	4.76899			A	3	1.2287	2.46604	3.4875	4.46728	4.95806	0.309336	0			100	0.226992	0.0250343	0.0183852	0.012402	0.0353039	0.208273	0.0652445	0.0379936	0.0029781	0.0803894	0.00726197	0.053154	0.00598982	0.00369263	0.00371204		0.286348	0.0206903	0.0183105
A	4	Sample X4	33199	44867	47173	48127	47456			A	4	1.26067	2.89157	3.44107	3.70767	3.51744			A	4	1.17974	2.84417	3.41635	3.66902	3.48093	0.416108	0			50	0.215865	0.0234412	0.0268362	0.0178581	0.0347591	0.176909	0.0605892	0.0413372	0.00952193	0.0731495	0.0124505	0.0624845	0.00301799	0.00391261	0.00197071		0.257847	0.0196763	0.0118926
A	5	Sample X5	26484	36984	41791	43216	43797			A	5	0.747931	1.65077	2.31508	2.56361	2.6737			A	5	0.929494	1.83746	2.50412	2.75268	2.86277	0.226992	0			25	0.144853	0.0294472	0.0230126	0.015484	0.041702	0.182568	0.0624872	0.0306192	0.00815578	0.06696	0.00547257	0.0462223	6.27781e-05	0.00418785	0.000974092		0.107755	0.00850615	0.00996718
A	6	Sample X6	27962	39413	42338	43330	42128			A	6	0.845646	1.95752	2.40709	2.58479	2.37129			A	6	0.764725	1.91012	2.38237	2.54614	2.33478	0.286348	0			12.5	0.131278	0.0218735	0.0181675	0.00721835	0.0276535	0.173496	0.062662	0.0307155	0.00686491	0.0513596	0.00138419	0.0358753	-0.00296779	0.00115897	-0.00232949		0.0712797	0.00708273	0.00262356
A	7	Sample X7	25477	36032	39735	41523	43733			A	7	0.685339	1.54368	2.00228	2.27145	2.6613			A	7	0.866902	1.73036	2.19132	2.46051	2.85037	0.215865	0			6.25	0.088011	0.018912	0.0128984	0.00483477	0.0175192	0.0957046	0.041424	0.0172154	0.00173403	0.0340032	-0.000885999	0.0200333	0.00148124	0.00116638	0.00178393		0.0329498	0.0125156	0.0044329
A	8	Sample X8	24648	36838	39583	40448	41493			A	8	0.636045	1.63391	1.98102	2.10527	2.26662			A	8	0.555124	1.58651	1.9563	2.06662	2.23011	0.257847	0			3.125	0.0808557	0.0189056	0.011109	0.0100763	0.0208257	0.0741639	0.0407486	0.0146013	0.00749758	0.0229192	0.00344989	0.0173199	0.00298888	0.000175464	0.00171464		0.0200972	0.00479826	-0.00276847
A	9	Sample X9	21136	30364	34778	35307	36559			A	9	0.44698	1.02127	1.41227	1.46643	1.60214			A	9	0.628543	1.20795	1.60131	1.6555	1.7912	0.144853	0			1.5625	0.0687006	0.0127277	0.00180316	0.00254215	0.00649927	0.0433776	0.0331853	0.00915266	0.00690778	0.0159307	-0.0019823	0.00717293	-0.00173895	-0.00158978	0.00229473		0.0153458	0.00758513	0.00421599
A	10	Sample X10	19330	26643	27747	28416	30720			A	10	0.360602	0.758099	0.830974	0.877164	1.04928			A	10	0.279681	0.7107	0.806258	0.838516	1.01277	0.107755	0			0.78125	0.028512	0.00692516	0.00629575	0.00385471	0.00601904	0.0255331	0.0101827	0.00427245	0.00566103	0.00874552	0.000631053	0.00603825	-0.00162771	0.000127025	0.000508821		0.00237068	0.01317	0.00750578
A	11	Sample X11	20397	29165	32242	33784	35875			A	11	0.410825	0.930816	1.17549	1.31515	1.52665			A	11	0.592388	1.1175	1.36453	1.50422	1.71571	0.131278	0			0.390625	0.0109942	0.00330754	0.00367456	0.00147584	0.00341561	0.0119408	0.000825316	0.005108	0.00340095	6.55328e-06	-0.00167215	0.0010971	-0.00182688	0.00068331	-0.00211279		0.0077809	0.00538266	0.00139715
A	12	Sample X12	16545	22007	24998	24141	27910			A	12	0.23952	0.491117	0.656619	0.606837	0.842083			A	12	0.158599	0.443718	0.631903	0.568189	0.805576	0.0712797	0			0	0	0	0	0	0	0	0	0	0	0	0	0	0	0	0		0	0	0
A	13	Sample X13	17490	24475	28329	29082	30886			A	13	0.279078	0.626	0.871067	0.924766	1.06252			A	13	0.460641	0.812685	1.06011	1.11383	1.25159	0.088011	0
A	14	Sample X14	14170	16669	18887	19077	21543			A	14	0.146349	0.244626	0.340404	0.349021	0.467393			A	14	0.0654276	0.197227	0.315688	0.310373	0.430887	0.0329498	0				3	27	51	75	99	123	147	171	195	219	243	267	291	315	339		3	27	51
A	15	Sample X15	17946	24319	27869	30186	32439			A	15	0.298712	0.617013	0.83928	1.00747	1.19264			A	15	0.480275	0.803698	1.02832	1.19653	1.3817	0.0808557	0				PP1-Neb 1 nM																PP1-Ph1 2.5 nM
A	16	Sample X16	13647	14893	16483	17278	18456			A	16	0.126946	0.173813	0.236976	0.270073	0.321107			A	16	0.0460248	0.126414	0.21226	0.231425	0.284601	0.0200972	0				V1	V2	V3	V4	V5	V6	V7	P1	P2	P3	P4	P5	P6	P7	P8		V1	V2	V3
A	17	Sample X17	17771	23317	25937	29512	30826			A	17	0.291134	0.560814	0.71355	0.956399	1.05772			A	17	0.472697	0.747499	0.90259	1.14547	1.24679	0.0687006	0		0	400	0.228212	0.0241748	0.021921	0.0177977	0.0441697	0.290989	0.0808879	0.043401	0.00819205	0.109131	0.0261076	0.0720032	0.0550586	0.00917297	0.00393308		0.507755	0.0463767	0.0528382
A	18	Sample X18	15244	15948	16431	17559	18516			A	18	0.187422	0.215284	0.234848	0.282026	0.323773			A	18	0.106502	0.167885	0.210131	0.243377	0.287266	0.0153458	0		2	200	0.309336	0.0210946	0.0234912	0.0196786	0.0430565	0.251032	0.0604999	0.0528832	0.000748802	0.0955008	0.0133572	0.0237183	-0.00465928	0.00629528	0.00168025		0.416108	0.030376	0.035684
A	19	Sample X19	13784	16579	18280	19467	20918			A	19	0.131991	0.240917	0.313326	0.366924	0.436194			A	19	0.313555	0.427602	0.502366	0.55599	0.62526	0.028512	0		4	100	0.226992	0.0250343	0.0183852	0.012402	0.0353039	0.208273	0.0652445	0.0379936	0.0029781	0.0803894	0.00726197	0.053154	0.00598982	0.00369263	0.00371204		0.286348	0.0206903	0.0183105
A	20	Sample X20	13428	12760	12946	13793	14030			A	20	0.118934	0.0948942	0.101528	0.132324	0.141117			A	20	0.0380126	0.0474953	0.076812	0.0936756	0.10461	0.00237068	0		6	50	0.215865	0.0234412	0.0268362	0.0178581	0.0347591	0.176909	0.0605892	0.0413372	0.00952193	0.0731495	0.0124505	0.0624845	0.00301799	0.00391261	0.00197071		0.257847	0.0196763	0.0118926
A	21	Sample X21	12392	13478	14341	15118	15660			A	21	0.0819023	0.120757	0.152776	0.182516	0.203794			A	21	0.263465	0.307442	0.341816	0.371582	0.39286	0.0109942	0		8	25	0.144853	0.0294472	0.0230126	0.015484	0.041702	0.182568	0.0624872	0.0306192	0.00815578	0.06696	0.00547257	0.0462223	6.27781e-05	0.00418785	0.000974092		0.107755	0.00850615	0.00996718
A	22	Sample X22	11008	10936	11226	11773	12031			A	22	0.0345701	0.0321717	0.0418697	0.0604395	0.0693265			A	22	-0.0463508	-0.0152273	0.0171536	0.0217913	0.0328198	0.0077809	0		10	12.5	0.131278	0.0218735	0.0181675	0.00721835	0.0276535	0.173496	0.062662	0.0307155	0.00686491	0.0513596	0.00138419	0.0358753	-0.00296779	0.00115897	-0.00232949		0.0712797	0.00708273	0.00262356
A	23	Sample X23	3680	3483	3392	3391	3391			A	23	-0.181563	-0.186685	-0.18904	-0.189066	-0.189066			A	23	0	0	0	0	0	0	1		12	6.25	0.088011	0.018912	0.0128984	0.00483477	0.0175192	0.0957046	0.041424	0.0172154	0.00173403	0.0340032	-0.000885999	0.0200333	0.00148124	0.00116638	0.00178393		0.0329498	0.0125156	0.0044329
A	24	Sample X24	12364	11390	10711	11130	11066			A	24	0.0809209	0.0473989	0.0247161	0.0386482	0.0365066			A	24	0	0	0	0	0	0	0		14	3.125	0.0808557	0.0189056	0.011109	0.0100763	0.0208257	0.0741639	0.0407486	0.0146013	0.00749758	0.0229192	0.00344989	0.0173199	0.00298888	0.000175464	0.00171464		0.0200972	0.00479826	-0.00276847
B	1	Sample X25	15225	17357	18846	20259	20712			B	1	0.186681	0.27342	0.338553	0.4042	0.426095			B	1	0.0825367	0.179236	0.270748	0.334597	0.357114	0.0241748	0		16	1.5625	0.0687006	0.0127277	0.00180316	0.00254215	0.00649927	0.0433776	0.0331853	0.00915266	0.00690778	0.0159307	-0.0019823	0.00717293	-0.00173895	-0.00158978	0.00229473		0.0153458	0.00758513	0.00421599
B	2	Sample X26	17221	20732	22518	23732	24688			B	2	0.267665	0.427071	0.517816	0.583774	0.638379			B	2	0.224146	0.409653	0.507606	0.568024	0.598155	0.0463767	0		18	0.78125	0.028512	0.00692516	0.00629575	0.00385471	0.00601904	0.0255331	0.0101827	0.00427245	0.00566103	0.00874552	0.000631053	0.00603825	-0.00162771	0.000127025	0.000508821		0.00237068	0.01317	0.00750578
B	3	Sample X27	13337	15311	16687	18578	19257			B	3	0.115624	0.190041	0.245369	0.326535	0.357247			B	3	0.0114793	0.0958577	0.177564	0.256931	0.288267	0.0210946	0		20	0.390625	0.0109942	0.00330754	0.00367456	0.00147584	na	0.0119408	na	0.005108	0.00340095	6.55328e-06	-0.00167215	0.0010971	-0.00182688	0.00068331	-0.00211279		0.0077809	0.00538266	0.00139715
B	4	Sample X28	15003	17358	18739	19688	20425			B	4	0.178058	0.273462	0.333739	0.3772	0.412174			B	4	0.13454	0.256044	0.323529	0.36145	0.37195	0.030376	0		22	0	na	0	0	0	0	0	0	0	0	0	0	0	0	0	0		0	0	0
B	5	Sample X29	13320	15695	17495	18778	19731			B	5	0.115006	0.205183	0.279291	0.335491	0.379211			B	5	0.0108622	0.110999	0.211486	0.265888	0.31023	0.0250343	0
B	6	Sample X30	14375	15834	16891	17274	17180			B	6	0.154059	0.21072	0.25383	0.269904	0.265936			B	6	0.110541	0.193302	0.24362	0.254154	0.225712	0.0206903	0
B	7	Sample X31	14031	16188	18060	19500	21230			B	7	0.141154	0.224958	0.303677	0.368452	0.451662			B	7	0.0370101	0.130775	0.235872	0.298849	0.382682	0.0234412	0
B	8	Sample X32	13368	14777	14926	15712	16430			B	8	0.11675	0.169355	0.175084	0.205859	0.234807			B	8	0.0732315	0.151937	0.164874	0.190109	0.194583	0.0196763	0
B	9	Sample X33	14472	17171	18155	19901	20416			B	9	0.157728	0.265557	0.307833	0.387195	0.41174			B	9	0.0535842	0.171373	0.240028	0.317592	0.34276	0.0294472	0
B	10	Sample X34	13010	13230	14078	13948	14175			B	10	0.103821	0.111746	0.142908	0.138066	0.146536			B	10	0.060303	0.0943276	0.132698	0.122316	0.106312	0.00850615	0
B	11	Sample X35	14081	16079	17141	17762	18707			B	11	0.14302	0.220553	0.264294	0.290746	0.332303			B	11	0.0388754	0.12637	0.196489	0.221142	0.263323	0.0218735	0
B	12	Sample X36	12626	12689	12468	11973	12708			B	12	0.0901431	0.0923739	0.084571	0.0673214	0.0930477			B	12	0.0466248	0.0749557	0.0743611	0.0515716	0.0528237	0.00708273	0
B	13	Sample X37	13243	14999	14790	16382	17066			B	13	0.112216	0.177903	0.169854	0.232846	0.261144			B	13	0.00807188	0.0837197	0.102049	0.163242	0.192163	0.018912	0
B	14	Sample X38	12347	13023	12653	12257	12686			B	14	0.0803256	0.104288	0.0910986	0.07718	0.0922676			B	14	0.0368073	0.0868696	0.0808887	0.0614302	0.0520436	0.0125156	0
B	15	Sample X39	12123	13951	13798	14607	15194			B	15	0.0725157	0.138177	0.132509	0.162858	0.185472			B	15	-0.0316286	0.0439937	0.0647035	0.0932545	0.116492	0.0189056	0
B	16	Sample X40	12211	12012	11866	11532	12027			B	16	0.0755762	0.0686692	0.0636334	0.0522128	0.0691881			B	16	0.0320579	0.0512509	0.0534235	0.036463	0.028964	0.00479826	0
B	17	Sample X41	11277	12467	12061	12814	13181			B	17	0.0435857	0.0845359	0.0703653	0.0968155	0.109975			B	17	-0.0605586	-0.00964776	0.00256029	0.0272122	0.0409948	0.0127277	0
B	18	Sample X42	11195	11321	10945	10705	10997			B	18	0.0408282	0.0450686	0.0324711	0.0245181	0.0342033			B	18	-0.00269011	0.0276504	0.0222612	0.00876838	-0.00602075	0.00758513	0
B	19	Sample X43	11753	12266	12335	12388	12368			B	19	0.0597541	0.0774941	0.0799056	0.081762	0.0810611			B	19	-0.0443902	-0.0166895	0.0121006	0.0121587	0.0120806	0.00692516	0
B	20	Sample X44	12231	12983	11870	11592	11781			B	20	0.0762732	0.102853	0.063771	0.0542543	0.0607138			B	20	0.0327549	0.085435	0.0535611	0.0385045	0.0204898	0.01317	0
B	21	Sample X45	12710	12802	12421	12851	12966			B	21	0.0931187	0.0963882	0.0829197	0.0981342	0.102244			B	21	-0.0110256	0.00220461	0.0151148	0.0285308	0.0332637	0.00330754	0
B	22	Sample X46	12313	12182	11844	11941	11775			B	22	0.079136	0.0745666	0.0628769	0.0662169	0.0605081			B	22	0.0356177	0.0571483	0.052667	0.0504672	0.0202841	0.00538266	0
B	23	Sample X47	13019	12740	11987	12039	12021			B	23	0.104144	0.0941836	0.067805	0.0696034	0.0689805			B	23	0	0	0	0	0	0	0
B	24	Sample X48	11275	10489	10268	10438	11177			B	24	0.0435183	0.0174182	0.0102099	0.0157498	0.040224			B	24	0	0	0	0	0	0	0
C	1	Sample X49	16907	18776	19901	21619	21942			C	1	0.254497	0.335401	0.387195	0.471246	0.487764			C	1	0.196659	0.284343	0.344249	0.428771	0.44754	0.021921	0
C	2	Sample X50	17610	22517	24809	26222	27099			C	2	0.28421	0.517763	0.645467	0.731348	0.787711			C	2	0.162905	0.374258	0.542613	0.629534	0.6777	0.0528382	0
C	3	Sample X51	14557	16754	18329	19544	20256			C	3	0.160955	0.24814	0.315486	0.370493	0.404057			C	3	0.103118	0.197083	0.27254	0.328018	0.363833	0.0234912	0
C	4	Sample X52	17071	20716	22541	23687	24404			C	4	0.261354	0.42629	0.519032	0.581263	0.621901			C	4	0.140049	0.282785	0.416179	0.479449	0.51189	0.035684	0
C	5	Sample X53	13010	14809	16195	16817	16906			C	5	0.103821	0.170583	0.225242	0.250753	0.254455			C	5	0.0459839	0.119525	0.182296	0.208278	0.214231	0.0183852	0
C	6	Sample X54	13630	16109	17116	16762	17866			C	6	0.126321	0.221764	0.263243	0.248472	0.295241			C	6	0.00501667	0.0782586	0.16039	0.146657	0.185229	0.0183105	0
C	7	Sample X55	13573	16184	17349	17619	18882			C	7	0.124231	0.224796	0.27308	0.284596	0.340178			C	7	0.0663936	0.173738	0.230134	0.242121	0.299954	0.0268362	0
C	8	Sample X56	15559	17266	17570	17916	19051			C	8	0.199795	0.269565	0.282496	0.297409	0.347838			C	8	0.0784898	0.12606	0.179643	0.195594	0.237826	0.0118926	0
C	9	Sample X57	12741	15040	15705	16857	17486			C	9	0.0942192	0.17949	0.20558	0.252415	0.278907			C	9	0.0363817	0.128432	0.162634	0.20994	0.238683	0.0230126	0
C	10	Sample X58	12578	14281	14698	14623	15410			C	10	0.0884469	0.150516	0.166331	0.163468	0.193924			C	10	-0.0328578	0.00701088	0.0634773	0.0616531	0.0839122	0.00996718	0
C	11	Sample X59	13527	15270	15752	16603	17129			C	11	0.122547	0.188438	0.20745	0.241905	0.263789			C	11	0.0647099	0.13738	0.164504	0.19943	0.223565	0.0181675	0
C	12	Sample X60	12745	13650	13091	13028	14119			C	12	0.0943612	0.127056	0.106731	0.104467	0.14444			C	12	-0.0269435	-0.0164493	0.00387824	0.00265279	0.0344283	0.00262356	0
C	13	Sample X61	12697	13932	14319	14643	15322			C	13	0.0926576	0.137472	0.151947	0.16423	0.190472			C	13	0.0348201	0.0864136	0.109001	0.121755	0.150248	0.0128984	0
C	14	Sample X62	12429	13543	13497	12605	13499			C	14	0.0832006	0.123133	0.121451	0.0894007	0.121524			C	14	-0.0381041	-0.0203725	0.0185976	-0.0124138	0.0115126	0.0044329	0
C	15	Sample X63	10694	11813	12342	12683	12872			C	15	0.0241553	0.0618119	0.0801506	0.0921613	0.0988834			C	15	-0.0336822	0.010754	0.0372045	0.0496863	0.0586594	0.011109	0
C	16	Sample X64	11742	12065	12444	11479	12276			C	16	0.0593773	0.0705039	0.0837275	0.0504132	0.0778432			C	16	-0.0619275	-0.0730013	-0.0191258	-0.0514013	-0.0321681	-0.00276847	0
C	17	Sample X65	13168	13180	13558	14031	14350			C	17	0.109506	0.109939	0.123682	0.141154	0.153116			C	17	0.0516686	0.0588812	0.0807357	0.0986794	0.112892	0.00180316	0
C	18	Sample X66	13948	14979	13997	13794	14265			C	18	0.138066	0.17713	0.139888	0.132361	0.149914			C	18	0.0167611	0.033625	0.0370348	0.0305463	0.0399029	0.00421599	0
C	19	Sample X67	12172	12696	12982	13068	13230			C	19	0.0742186	0.0926221	0.102817	0.105904	0.111746			C	19	0.0163812	0.0415642	0.0598714	0.0634293	0.0715218	0.00629575	0
C	20	Sample X68	11893	13369	12157	11949	12210			C	20	0.0645626	0.116786	0.073697	0.0664929	0.0755414			C	20	-0.0567421	-0.026719	-0.0291562	-0.0353216	-0.0344699	0.00750578	0
C	21	Sample X69	12136	12363	11910	12372	12568			C	21	0.0729672	0.0808859	0.0651482	0.0812012	0.0880939			C	21	0.0151297	0.029828	0.0222022	0.0387262	0.0478699	0.00367456	0
C	22	Sample X70	13643	14389	13479	13491	13489			C	22	0.126799	0.154588	0.120794	0.121232	0.121159			C	22	0.00549404	0.0110826	0.0179403	0.0194172	0.0111473	0.00139715	0
C	23	Sample X71	11697	11498	11258	11244	11177			C	23	0.0578375	0.0510579	0.042946	0.042475	0.040224			C	23	0	0	0	0	0	0	0
C	24	Sample X72	13493	14094	12983	12954	13182			C	24	0.121305	0.143505	0.102853	0.101814	0.110011			C	24	0	0	0	0	0	0	0
D	1	Sample X73	16428	18147	19577	20749	21581			D	1	0.234725	0.307482	0.372027	0.427902	0.469318			D	1	0.138906	0.210097	0.295544	0.351245	0.388222	0.0177977	0
D	2	Sample X74	19281	24992	28203	30089	30537			D	2	0.358349	0.656264	0.862285	1	1.03481			D	2	0.297738	0.56428	0.79817	0.935337	0.967075	0.0666354	0
D	3	Sample X75	15430	17394	18995	20123	20450			D	3	0.19471	0.274991	0.345294	0.39771	0.41338			D	3	0.0988908	0.177605	0.268811	0.321053	0.332284	0.0196786	0
D	4	Sample X76	17214	20836	22866	24004	24143			D	4	0.267369	0.432163	0.536352	0.599063	0.606951			D	4	0.206758	0.340179	0.472237	0.534397	0.539215	0.0333552	0
D	5	Sample X77	14320	15644	16772	16806	17599			D	5	0.151985	0.203159	0.248886	0.250296	0.283738			D	5	0.0561657	0.105774	0.172404	0.17364	0.202642	0.012402	0
D	6	Sample X78	15707	17377	18200	17708	19030			D	6	0.20566	0.274268	0.309807	0.288419	0.346883			D	6	0.145049	0.182284	0.245692	0.223753	0.279147	0.00930886	0
D	7	Sample X79	13305	15245	16080	16315	16837			D	7	0.114462	0.187461	0.220594	0.230115	0.251584			D	7	0.0186434	0.090076	0.144111	0.153458	0.170488	0.0178581	0
D	8	Sample X80	13044	14484	13985	14250	14746			D	8	0.105042	0.158183	0.139441	0.14935	0.168167			D	8	0.0444309	0.0661993	0.0753264	0.0846845	0.100431	0.0054421	0
D	9	Sample X81	12802	14529	15265	15486	15594			D	9	0.0963882	0.159891	0.188243	0.196914	0.201179			D	9	0.000569414	0.0625055	0.11176	0.120257	0.120082	0.015484	0
D	10	Sample X82	13081	14036	13988	13472	13765			D	10	0.106372	0.141341	0.139553	0.120538	0.13129			D	10	0.0457608	0.0493567	0.075438	0.0558721	0.0635542	0.000898982	0
D	11	Sample X83	13219	14048	14321	15118	15302			D	11	0.111348	0.141788	0.152022	0.182516	0.189689			D	11	0.0155292	0.0444027	0.0755398	0.105859	0.108593	0.00721835	0
D	12	Sample X84	13174	14007	13236	12768	13268			D	12	0.109723	0.14026	0.111963	0.0951786	0.113121			D	12	0.0491116	0.0482763	0.0478478	0.0305127	0.0453853	-0.000208835	0
D	13	Sample X85	11411	12022	12264	12935	13144			D	13	0.0481093	0.0690151	0.0774243	0.101135	0.10864			D	13	-0.0477095	-0.0283705	0.000941903	0.0244778	0.0275443	0.00483477	0
D	14	Sample X86	12695	13439	12997	12477	12895			D	14	0.0925867	0.119334	0.103355	0.0848876	0.0997046			D	14	0.0319757	0.0273504	0.03924	0.0202216	0.0319688	-0.00115634	0
D	15	Sample X87	11700	12898	12264	12732	12920			D	15	0.05794	0.0998118	0.0774243	0.0938995	0.100598			D	15	-0.0378788	0.00242627	0.000941903	0.0172428	0.019502	0.0100763	0
D	16	Sample X88	12046	12230	12270	11682	12106			D	16	0.0698457	0.0762383	0.0776337	0.0573247	0.0719256			D	16	0.00923477	-0.0157457	0.0135186	-0.0073412	0.00418969	-0.00624512	0
D	17	Sample X89	11382	11727	11702	11895	12004			D	17	0.0471284	0.0588637	0.0580084	0.0646315	0.0683925			D	17	-0.0486904	-0.0385218	-0.018474	-0.0120252	-0.0127036	0.00254215	0
D	18	Sample X90	11580	12180	11697	11536	11712			D	18	0.0538456	0.074497	0.0578375	0.0523488	0.0583505			D	18	-0.00676534	-0.0174871	-0.00627764	-0.0123172	-0.00938542	-0.00268044	0
D	19	Sample X91	12858	13330	13247	13365	13454			D	19	0.0983838	0.115369	0.112361	0.116641	0.119881			D	19	0.00256501	0.0179838	0.0358785	0.0399841	0.0387852	0.00385471	0
D	20	Sample X92	11531	12160	11617	11602	11630			D	20	0.0521788	0.0738013	0.0551062	0.0545949	0.0555495			D	20	-0.00843213	-0.0181827	-0.00900892	-0.010071	-0.0121864	-0.00243765	0
D	21	Sample X93	12032	12247	11992	11984	12013			D	21	0.0693611	0.0768311	0.0679777	0.0677013	0.0687037			D	21	-0.0264577	-0.0205544	-0.00850464	-0.00895542	-0.0123924	0.00147584	0
D	22	Sample X94	11863	12101	11542	11656	11685			D	22	0.0635302	0.0717521	0.0525527	0.0564367	0.0574273			D	22	0.00291922	-0.020232	-0.0115624	-0.00822925	-0.0103086	-0.0057878	0
D	23	Sample X95	12786	12830	12237	12242	12369			D	23	0.0958188	0.0973855	0.0764824	0.0766567	0.0810961			D	23	0	0	0	0	0	0	0
D	24	Sample X96	11778	12678	11880	11896	11985			D	24	0.060611	0.0919841	0.0641151	0.0646659	0.0677359			D	24	0	0	0	0	0	0	0
E	1	Sample X97	19263	22632	25028	26882	28191			E	1	0.357523	0.523856	0.658399	0.773535	0.861452			E	1	0.329202	0.505881	0.642257	0.752738	0.839405	0.0441697	0
E	2	Sample X98	35212	46434	49705	51175	51327			E	2	1.45657	3.25156	4.2132	4.77483	4.83892			E	2	1.45561	3.23653	4.2063	4.77438	4.829	0.445229	0
E	3	Sample X99	16713	20345	23173	24726	24732			E	3	0.246444	0.408324	0.552949	0.6406	0.640952			E	3	0.218123	0.390349	0.536807	0.619803	0.618905	0.0430565	0
E	4	Sample X100	34077	45992	49840	51058	51410			E	4	1.34317	3.14458	4.26076	4.72634	4.87444			E	4	1.3422	3.12955	4.25386	4.72589	4.86452	0.446836	0
E	5	Sample X101	16154	19196	21287	21933	22574			E	5	0.223582	0.354453	0.454511	0.487301	0.520779			E	5	0.195262	0.336478	0.438369	0.466503	0.498732	0.0353039	0
E	6	Sample X102	28499	36922	39474	39942	39641			E	6	0.883007	1.64359	1.96592	2.03162	1.98911			E	6	0.882043	1.62856	1.95901	2.03117	1.97919	0.18663	0
E	7	Sample X103	14911	18049	20095	21376	22216			E	7	0.174506	0.303197	0.396378	0.458973	0.501963			E	7	0.146186	0.285222	0.380236	0.438176	0.479916	0.0347591	0
E	8	Sample X104	24443	32326	33088	33075	34136			E	8	0.624151	1.18278	1.25054	1.24936	1.34887			E	8	0.623187	1.16774	1.24364	1.24891	1.33895	0.136139	0
E	9	Sample X105	14712	18506	20080	21089	21991			E	9	0.166866	0.323328	0.395665	0.444646	0.490291			E	9	0.138545	0.305353	0.379523	0.423848	0.468244	0.041702	0
E	10	Sample X106	19385	26084	26601	27071	29155			E	10	0.363135	0.722699	0.755405	0.785873	0.930086			E	10	0.362171	0.707668	0.748503	0.785423	0.920168	0.0863743	0
E	11	Sample X107	14588	17096	18975	20215	20919			E	11	0.162134	0.262403	0.344386	0.402096	0.436243			E	11	0.133814	0.244428	0.328244	0.381299	0.414196	0.0276535	0
E	12	Sample X108	16956	22196	22176	23280	24637			E	12	0.256541	0.500921	0.499879	0.558788	0.635404			E	12	0.255576	0.48589	0.492977	0.558338	0.625486	0.0575783	0
E	13	Sample X109	12760	14390	15758	16618	17236			E	13	0.0948942	0.154626	0.207689	0.242523	0.268298			E	13	0.0665738	0.136651	0.191547	0.221726	0.246251	0.0175192	0
E	14	Sample X110	14260	18427	19125	19422	20637			E	14	0.149726	0.319821	0.351209	0.364843	0.42244			E	14	0.148762	0.30479	0.344307	0.364393	0.412523	0.0390071	0
E	15	Sample X111	12478	14476	14464	15449	16013			E	15	0.0849227	0.15788	0.157425	0.195457	0.217895			E	15	0.0566023	0.139905	0.141283	0.17466	0.195848	0.0208257	0
E	16	Sample X112	13816	16028	16408	16976	17833			E	16	0.133174	0.218499	0.233907	0.257376	0.293812			E	16	0.132209	0.203468	0.227006	0.256926	0.283895	0.0178146	0
E	17	Sample X113	12935	13369	14177	14593	14946			E	17	0.101135	0.116786	0.146611	0.162325	0.175856			E	17	0.0728141	0.0988112	0.130469	0.141528	0.153809	0.00649927	0
E	18	Sample X114	14314	15618	15544	15851	16499			E	18	0.151758	0.202129	0.199202	0.211399	0.237632			E	18	0.150794	0.187098	0.1923	0.210949	0.227714	0.00907593	0
E	19	Sample X115	10098	10520	10621	11108	11196			E	19	0.00470314	0.0184339	0.0217506	0.0379115	0.0408618			E	19	-0.0236173	0.000458811	0.00560853	0.0171144	0.0188151	0.00601904	0
E	20	Sample X116	13221	14270	14029	13995	14367			E	20	0.11142	0.150102	0.14108	0.139814	0.153757			E	20	0.110456	0.135071	0.134178	0.139364	0.14384	0.00615384	0
E	21	Sample X117	4163	4288	4356	4419	4467			E	21	-0.168869	-0.165552	-0.163742	-0.162062	-0.160779			E	21	-0.19719	-0.183527	-0.179884	-0.182859	-0.182826	0.00341561	1
E	22	Sample X118	10806	10977	10663	10520	10615			E	22	0.0278567	0.0335367	0.0231333	0.0184339	0.0215532			E	22	0.0268923	0.0185057	0.0162315	0.0179839	0.0116357	-0.00209665	0
E	23	Sample X119	10820	10506	10450	10592	10630			E	23	0.0283205	0.017975	0.0161421	0.0207971	0.0220467			E	23	0	0	0	0	0	0	0
E	24	Sample X120	9982	10416	10166	9966	10259			E	24	0.000964432	0.015031	0.00690189	0.000449942	0.00991754			E	24	0	0	0	0	0	0	0
F	1	Sample X121	32809	42201	46196	48410	48872			F	1	1.22538	2.38366	3.19339	3.79201	3.93537			F	1	1.27441	2.43837	3.24761	3.84874	3.99056	0.290989	0
F	2	Sample X122	36940	46073	48521	49573	49514			F	2	1.64568	3.16385	3.8258	4.1674	4.14715			F	2	1.47942	2.97642	3.66606	3.98419	3.97246	0.37425	0
F	3	Sample X123	30168	39751	44003	45366	45193			F	3	1.00608	2.00453	2.71407	3.00055	2.9622			F	3	1.05511	2.05924	2.76829	3.05728	3.01739	0.251032	0
F	4	Sample X124	34851	44629	47339	49028	47791			F	4	1.41964	2.84131	3.4856	3.98544	3.61075			F	4	1.25338	2.65389	3.32586	3.80222	3.43605	0.350126	0
F	5	Sample X125	29574	38125	42242	43903	45397			F	5	0.96102	1.78844	2.39064	2.69438	3.00748			F	5	1.01005	1.84314	2.44487	2.75111	3.06267	0.208273	0
F	6	Sample X126	24199	31096	33297	34474	34679			F	6	0.610143	1.07946	1.26966	1.38194	1.40233			F	6	0.443889	0.892038	1.10992	1.19872	1.22763	0.112037	0
F	7	Sample X127	26294	35030	39242	41695	42088			F	7	0.735884	1.43785	1.93417	2.29934	2.36453			F	7	0.784917	1.49255	1.98839	2.35608	2.41973	0.176909	0
F	8	Sample X128	23053	29380	29809	31496	33843			F	8	0.546434	0.946611	0.978674	1.11227	1.32075			F	8	0.38018	0.759189	0.818935	0.929058	1.14605	0.0947523	0
F	9	Sample X129	24850	34378	37584	40672	42068			F	9	0.647877	1.37247	1.72183	2.13878	2.36117			F	9	0.696911	1.42718	1.77606	2.19551	2.41636	0.182568	0
F	10	Sample X130	16737	21668	22060	23125	25111			F	10	0.247437	0.473737	0.493858	0.550339	0.663335			F	10	0.0811825	0.286314	0.334119	0.367123	0.488636	0.0512829	0
F	11	Sample X131	22821	32774	35282	37837	39053			F	11	0.533939	1.22225	1.46383	1.75267	1.90869			F	11	0.582972	1.27696	1.51806	1.8094	1.96388	0.173496	0
F	12	Sample X132	15699	19532	19108	20282	21875			F	12	0.205342	0.369936	0.350433	0.405302	0.484318			F	12	0.039088	0.182514	0.190694	0.222087	0.309619	0.0358565	0
F	13	Sample X133	20453	27144	30218	33103	34330			F	13	0.413525	0.79067	1.00994	1.2519	1.36776			F	13	0.462558	0.845376	1.06416	1.30863	1.42296	0.0957046	0
F	14	Sample X134	13429	16279	16424	16554	17791			F	14	0.11897	0.228651	0.234561	0.23989	0.291997			F	14	-0.0472841	0.0412282	0.0748223	0.0566743	0.117298	0.0221281	0
F	15	Sample X135	16926	23050	24779	26879	28343			F	15	0.255289	0.546272	0.643706	0.77334	0.872047			F	15	0.304322	0.600978	0.697928	0.830071	0.927237	0.0741639	0
F	16	Sample X136	13029	14626	15181	14827	15616			F	16	0.104503	0.163582	0.184966	0.171274	0.20205			F	16	-0.0617509	-0.0238405	0.025227	-0.0119412	0.0273507	0.0094776	0
F	17	Sample X137	14447	18535	19219	21415	22291			F	17	0.156781	0.324619	0.355506	0.460934	0.50588			F	17	0.205815	0.379325	0.409728	0.517665	0.56107	0.0433776	0
F	18	Sample X138	13325	14690	14364	14213	14784			F	18	0.115188	0.166025	0.153644	0.147961	0.169623			F	18	-0.0510662	-0.0213977	-0.00609528	-0.0352543	-0.00507538	0.00741712	0
F	19	Sample X139	13338	15869	16492	18142	18865			F	19	0.11566	0.212119	0.237345	0.307263	0.339411			F	19	0.164693	0.266826	0.291568	0.363994	0.394601	0.0255331	0
F	20	Sample X140	12915	13891	13357	13482	13933			F	20	0.100419	0.13595	0.11635	0.120903	0.137509			F	20	-0.0658347	-0.0514721	-0.0433891	-0.0623121	-0.0371901	0.00359066	0
F	21	Sample X141	10145	11417	11898	12905	13410			F	21	0.0062223	0.0483123	0.0647348	0.100062	0.118278			F	21	0.0552557	0.103019	0.118957	0.156792	0.173468	0.0119408	0
F	22	Sample X142	15469	15335	15053	15270	15524			F	22	0.196244	0.190981	0.179994	0.188438	0.198412			F	22	0.0299902	0.00355867	0.0202546	0.00522275	0.0237136	-0.00660788	0
F	23	Sample X143	8384	8197	8213	8130	8181			F	23	-0.0490334	-0.0547066	-0.0542227	-0.0567305	-0.0551904			F	23	0	0	0	0	0	0	0
F	24	Sample X144	14696	15244	14525	15136	14916			F	24	0.166254	0.187422	0.159739	0.183215	0.174699			F	24	0	0	0	0	0	0	0
G	1	Sample X145	17682	24221	28588	31872	34256			G	1	0.287301	0.6114	0.8893	1.1438	1.36053			G	1	0.228676	0.552228	0.841969	1.10031	1.31802	0.0808879	0
G	2	Sample X146	34668	46261	50396	51532	51047			G	2	1.40123	3.20914	4.46482	4.92734	4.72182			G	2	1.3231	3.12973	4.39867	4.86522	4.65567	0.451656	0
G	3	Sample X147	15423	20934	24794	27755	30008			G	3	0.194434	0.436982	0.644586	0.831517	0.9938			G	3	0.13581	0.37781	0.597254	0.788033	0.951291	0.0604999	0
G	4	Sample X148	30878	41076	44507	45610	46059			G	4	1.06188	2.20067	2.81596	3.05569	3.1605			G	4	0.983761	2.12126	2.74981	2.99356	3.09436	0.284374	0
G	5	Sample X149	16476	22144	26080	28597	30234			G	5	0.236689	0.498215	0.722449	0.889938	1.01118			G	5	0.178065	0.439043	0.675118	0.846453	0.968668	0.0652445	0
G	6	Sample X150	24677	32357	34650	34679	34370			G	6	0.637737	1.18547	1.39943	1.40233	1.37169			G	6	0.559614	1.10606	1.33328	1.34021	1.30554	0.136611	0
G	7	Sample X151	14952	20566	24378	26350	27726			G	7	0.176087	0.418992	0.620404	0.739423	0.82955			G	7	0.117463	0.35982	0.573073	0.695938	0.787041	0.0605892	0
G	8	Sample X152	17644	24329	25660	25512	25653			G	8	0.285668	0.617587	0.696487	0.687463	0.696059			G	8	0.207546	0.538171	0.630339	0.625342	0.629911	0.0826563	0
G	9	Sample X153	15716	21327	25025	27028	28721			G	9	0.206018	0.456514	0.658221	0.783056	0.898759			G	9	0.147394	0.397342	0.610889	0.739571	0.85625	0.0624872	0
G	10	Sample X154	18435	23894	25118	25166	25782			G	10	0.320176	0.592857	0.663752	0.666617	0.703974			G	10	0.242053	0.513441	0.597604	0.604496	0.637826	0.0678469	0
G	11	Sample X155	16644	22078	24856	27473	29257			G	11	0.243594	0.49479	0.648231	0.812508	0.937553			G	11	0.18497	0.435618	0.600899	0.769023	0.895044	0.062662	0
G	12	Sample X156	16430	20568	20336	21742	22782			G	12	0.234807	0.419089	0.407892	0.477508	0.531851			G	12	0.156684	0.339673	0.341744	0.415387	0.465703	0.0457472	0
G	13	Sample X157	15229	19166	22760	24777	26036			G	13	0.186837	0.353081	0.530675	0.643588	0.719704			G	13	0.128213	0.293909	0.483344	0.600104	0.677196	0.041424	0
G	14	Sample X158	13761	16715	16883	17146	17928			G	14	0.131143	0.246526	0.253497	0.264504	0.29793			G	14	0.0530199	0.167111	0.187349	0.202383	0.231782	0.0285227	0
G	15	Sample X159	14600	18569	19957	21284	22507			G	15	0.162591	0.326133	0.389838	0.454361	0.517235			G	15	0.103967	0.266961	0.342507	0.410876	0.474726	0.0407486	0
G	16	Sample X160	13238	15962	16520	16157	16632			G	16	0.112035	0.215846	0.238493	0.223704	0.2431			G	16	0.0339126	0.13643	0.172345	0.161583	0.176952	0.0256293	0
G	17	Sample X161	13877	17246	18142	19784	20631			G	17	0.135431	0.26872	0.307263	0.381694	0.422149			G	17	0.0768073	0.209548	0.259932	0.338209	0.37964	0.0331853	0
G	18	Sample X162	13510	15276	14741	15168	15588			G	18	0.121926	0.188672	0.167976	0.18446	0.200941			G	18	0.0438033	0.109257	0.101828	0.122339	0.134793	0.0163633	0
G	19	Sample X163	13880	14971	15845	16817	18152			G	19	0.135543	0.176821	0.21116	0.250753	0.307701			G	19	0.0769185	0.117649	0.163828	0.207268	0.265193	0.0101827	0
G	20	Sample X164	15388	14649	15270	14876	15179			G	20	0.19306	0.164459	0.188438	0.173158	0.184888			G	20	0.114937	0.0850433	0.12229	0.111037	0.11874	-0.0074734	0
G	21	Sample X165	1820	1976	1953	2018	2023			G	21	-0.228689	-0.22484	-0.225409	-0.223801	-0.223677			G	21	-0.287313	-0.284012	-0.27274	-0.267285	-0.266186	0.000825316	1
G	22	Sample X166	12517	12693	12575	12685	12870			G	22	0.0862956	0.0925158	0.088341	0.0922321	0.098812			G	22	0.00817304	0.0130999	0.0221931	0.0301112	0.0326641	0.00123173	0
G	23	Sample X167	11720	11736	11388	11274	11245			G	23	0.0586242	0.0591718	0.0473313	0.0434847	0.0425086			G	23	0	0	0	0	0	0	0
G	24	Sample X168	12284	12321	11939	11822	11939			G	24	0.0781226	0.0794158	0.0661479	0.062121	0.0661479			G	24	0	0	0	0	0	0	0
H	1	Sample X169	16723	20498	22287	23808	24905			H	1	0.246857	0.415699	0.505671	0.588027	0.651119			H	1	0.191376	0.36498	0.455766	0.57342	0.633864	0.043401	0
H	2	Sample X170	22594	28750	29899	30530	31788			H	2	0.521839	0.90083	0.985495	1.03426	1.1367			H	2	0.460645	0.868159	0.966208	1.01274	1.08855	0.101878	0
H	3	Sample X171	17348	21787	23640	23873	25616			H	3	0.273038	0.479808	0.578646	0.591676	0.693797			H	3	0.217556	0.429089	0.528742	0.577069	0.676543	0.0528832	0
H	4	Sample X172	18419	22998	23123	24283	25753			H	4	0.319467	0.54346	0.55023	0.614948	0.70219			H	4	0.258273	0.510789	0.530943	0.593427	0.654047	0.0631291	0
H	5	Sample X173	15442	18931	20614	22640	23464			H	5	0.195182	0.342393	0.421322	0.524281	0.568897			H	5	0.1397	0.291675	0.371418	0.509674	0.551642	0.0379936	0
H	6	Sample X174	15943	18969	20202	20712	21896			H	6	0.215083	0.344114	0.401475	0.426095	0.485397			H	6	0.153889	0.311444	0.382189	0.404575	0.437254	0.0393886	0
H	7	Sample X175	14319	18262	19492	20070	21579			H	7	0.151947	0.312533	0.368082	0.395191	0.469217			H	7	0.0964656	0.261814	0.318177	0.380584	0.451962	0.0413372	0
H	8	Sample X176	13072	16340	16938	17180	18010			H	8	0.106048	0.231133	0.25579	0.265936	0.301497			H	8	0.044854	0.198462	0.236503	0.244416	0.253353	0.0384021	0
H	9	Sample X177	14019	17001	17999	18357	19492			H	9	0.140707	0.258422	0.301017	0.316723	0.368082			H	9	0.085226	0.207703	0.251113	0.302117	0.350827	0.0306192	0
H	10	Sample X178	12826	15168	14512	14923	16241			H	10	0.097243	0.18446	0.159246	0.174969	0.227107			H	10	0.0360489	0.151789	0.139959	0.153448	0.178964	0.0289351	0
H	11	Sample X179	13585	16624	16215	16752	17657			H	11	0.124671	0.24277	0.226053	0.248058	0.286226			H	11	0.0691895	0.192051	0.176148	0.233451	0.268972	0.0307155	0
H	12	Sample X180	12717	14285	13452	14080	14523			H	12	0.0933671	0.150667	0.119808	0.142982	0.159663			H	12	0.032173	0.117996	0.100522	0.121462	0.11152	0.0214557	0
H	13	Sample X181	13003	14733	14869	15940	16563			H	13	0.10357	0.167669	0.172889	0.214963	0.240259			H	13	0.048089	0.116951	0.122984	0.200356	0.223005	0.0172154	0
H	14	Sample X182	12147	13522	13284	12979	13294			H	14	0.0733494	0.122365	0.113701	0.10271	0.114063			H	14	0.0121553	0.0896937	0.0944143	0.0811895	0.0659202	0.0193846	0
H	15	Sample X183	11930	13443	13481	13098	13508			H	15	0.0658376	0.11948	0.120867	0.106983	0.121853			H	15	0.0103563	0.0687617	0.0709621	0.0923769	0.104598	0.0146013	0
H	16	Sample X184	11897	13009	12705	12391	12337			H	16	0.0647004	0.103785	0.0929413	0.0818672	0.0799756			H	16	0.0035063	0.0711146	0.0736548	0.0603469	0.0318325	0.0169021	0
H	17	Sample X185	12280	13177	13269	12845	13270			H	17	0.0779829	0.109831	0.113157	0.0979202	0.113194			H	17	0.0225016	0.0591123	0.0632529	0.0833137	0.0959391	0.00915266	0
H	18	Sample X186	12561	13995	13547	12720	12944			H	18	0.0878469	0.139814	0.123279	0.0934735	0.101457			H	18	0.0266528	0.107143	0.103993	0.0719532	0.0533134	0.0201225	0
H	19	Sample X187	10260	10637	10702	11002	11376			H	19	0.00995002	0.0222771	0.0244192	0.03437	0.0469256			H	19	-0.0455312	-0.0284414	-0.0254853	0.0197635	0.0296711	0.00427245	0
H	20	Sample X188	12812	12604	12610	12750	13650			H	20	0.0967443	0.0893653	0.0895774	0.0945389	0.127056			H	20	0.0355502	0.0566945	0.0702909	0.0730185	0.0789128	0.00528607	0
H	21	Sample X189	14294	14707	14761	14165	14262			H	21	0.151005	0.166675	0.168742	0.146161	0.149801			H	21	0.0955241	0.115956	0.118837	0.131555	0.132547	0.005108	0
H	22	Sample X190	12909	12118	12103	12266	12537			H	22	0.100205	0.0723421	0.0718215	0.0774941	0.0870004			H	22	0.0390108	0.0396713	0.0525349	0.0559738	0.0388573	0.000165118	0
H	23	Sample X191	11628	11488	11464	10403	10484			H	23	0.0554813	0.0507185	0.0499045	0.0146065	0.0172545			H	23	0	0	0	0	0	0	0
H	24	Sample X192	11795	10951	10546	10614	11412			H	24	0.0611941	0.0326708	0.0192865	0.0215203	0.0481431			H	24	0	0	0	0	0	0	0
I	1	Sample X193	12034	12682	12571	12773	12938			I	1	0.0694303	0.0921258	0.0881998	0.0953564	0.101242			I	1	0.0173534	0.0501216	0.0437381	0.0498829	0.0558359	0.00819205	0
I	2	Sample X194	15041	16181	16271	16685	16982			I	2	0.179529	0.224675	0.228326	0.245286	0.257627			I	2	0.102767	0.139576	0.175059	0.182891	0.190306	0.00920222	0
I	3	Sample X195	11535	11326	11629	11846	11967			I	3	0.0523148	0.0452373	0.0555154	0.0629456	0.0671142			I	3	0.000237907	0.00323311	0.0110537	0.0174721	0.0217082	0.000748802	0
I	4	Sample X196	13533	13452	13760	14011	14210			I	4	0.122767	0.119808	0.131106	0.140409	0.147848			I	4	0.0460054	0.0347097	0.0778386	0.0780135	0.080527	-0.00282392	0
I	5	Sample X197	10052	10109	9904	10118	10189			I	5	0.00321873	0.00505846	-0.00154098	0.00534928	0.00764678			I	5	-0.0488581	-0.0369457	-0.0460027	-0.0401242	-0.0377592	0.0029781	0
I	6	Sample X198	11135	11542	11417	11472	11731			I	6	0.0388157	0.0525527	0.0483123	0.0501758	0.0590007			I	6	-0.0379457	-0.0325459	-0.00495466	-0.01222	-0.00832072	0.00134994	0
I	7	Sample X199	12336	13125	12150	12100	12215			I	7	0.0799406	0.107956	0.0734537	0.0717174	0.0757156			I	7	0.0278637	0.0659514	0.028992	0.0262439	0.0303096	0.00952193	0
I	8	Sample X200	11940	12052	11936	12148	12122			I	8	0.0661824	0.0700535	0.0660445	0.0733842	0.072481			I	8	-0.010579	-0.0150451	0.0127775	0.0109884	0.00515959	-0.00111655	0
I	9	Sample X201	11009	11677	11132	10828	10870			I	9	0.0346034	0.0571539	0.0387152	0.0285856	0.0299785			I	9	-0.0174734	0.0151497	-0.00574651	-0.0168879	-0.0154275	0.00815578	0
I	10	Sample X202	11998	12142	11934	11806	11685			I	10	0.0681851	0.0731757	0.0659755	0.0615716	0.0574273			I	10	-0.00857625	-0.011923	0.0127085	-0.000824175	-0.00989411	-0.000836685	0
I	11	Sample X203	11857	12358	11506	11383	11558			I	11	0.0633238	0.0807108	0.0513295	0.0471623	0.0530969			I	11	0.0112469	0.0387066	0.00686785	0.00168876	0.00769089	0.00686491	0
I	12	Sample X204	11114	11220	10876	10940	10941			I	12	0.0381123	0.0416681	0.0301777	0.0323047	0.032338			I	12	-0.038649	-0.0434306	-0.0230893	-0.030091	-0.0349834	-0.00119539	0
I	13	Sample X205	11066	10972	10676	10740	10735			I	13	0.0365066	0.0333701	0.0235617	0.0256737	0.0255086			I	13	-0.0155702	-0.0086341	-0.0208999	-0.0197998	-0.0198974	0.00173403	0
I	14	Sample X206	11658	12453	11797	11715	11794			I	14	0.056505	0.0840437	0.0612627	0.0584531	0.0611598			I	14	-0.0202564	-0.00105492	0.0079957	-0.00394267	-0.0061616	0.00480037	0
I	15	Sample X207	10574	11174	10419	10355	10422			I	15	0.0202057	0.0401233	0.0151289	0.0130409	0.0152269			I	15	-0.0318712	-0.00188085	-0.0293327	-0.0324326	-0.0301791	0.00749758	0
I	16	Sample X208	10797	11684	11251	10776	10959			I	16	0.0275588	0.0573931	0.0427105	0.0268638	0.0329372			I	16	-0.0492026	-0.0277056	-0.0105565	-0.0355319	-0.0343842	0.00537426	0
I	17	Sample X209	12291	12789	11840	12014	12053			I	17	0.0783671	0.0959256	0.0627394	0.0687383	0.0700881			I	17	0.0262903	0.0539214	0.0182777	0.0232648	0.0246821	0.00690778	0
I	18	Sample X210	11004	12106	11372	10931	10908			I	18	0.0344367	0.0719256	0.0467905	0.0320053	0.0312406			I	18	-0.0423247	-0.0131731	-0.00647654	-0.0303904	-0.0360808	0.0072879	0
I	19	Sample X211	8756	9161	8637	8676	8713			I	19	-0.0376394	-0.0250679	-0.0413001	-0.040102	-0.0389639			I	19	-0.0897162	-0.0670721	-0.0857617	-0.0855755	-0.0843699	0.00566103	0
I	20	Sample X212	12045	12589	11371	11456	11466			I	20	0.0698111	0.0888354	0.0467567	0.0496333	0.0499723			I	20	-0.00695027	0.00373672	-0.00651033	-0.0127625	-0.0173491	0.00267175	0
I	21	Sample X213	11452	11556	11192	11310	11366			I	21	0.0494977	0.0530289	0.0407275	0.0446977	0.0465877			I	21	-0.00257914	0.0110247	-0.0037342	-0.000775811	0.00118173	0.00340095	0
I	22	Sample X214	13812	14947	14285	13675	14180			I	22	0.133026	0.175894	0.150667	0.127975	0.146723			I	22	0.0562645	0.0907958	0.0973996	0.0655791	0.0794019	0.00863283	0
I	23	Sample X215	11528	11230	11303	11333	11331			I	23	0.0520769	0.0420042	0.0444617	0.0454735	0.045406			I	23	0	0	0	0	0	0	0
I	24	Sample X216	12245	12483	11563	11830	11973			I	24	0.0767614	0.0850986	0.053267	0.0623958	0.0673214			I	24	0	0	0	0	0	0	0
J	1	Sample X217	39915	42687	43176	42842	42371			J	1	2.02777	2.46795	2.55623	2.49554	2.41277			J	1	2.00701	2.44353	2.50034	2.45509	2.40249	0.109131	0
J	2	Sample X218	41129	46028	47892	49133	49907			J	2	2.20894	3.15312	3.63952	4.01963	4.28465			J	2	2.26534	3.21302	3.70056	4.07805	4.34415	0.23692	0
J	3	Sample X219	33721	37359	38032	37502	38230			J	3	1.30919	1.69485	1.77681	1.71195	1.80165			J	3	1.28843	1.67043	1.72092	1.67149	1.79138	0.0955008	0
J	4	Sample X220	36599	43535	46783	48728	46859			J	4	1.60666	2.62338	3.33933	3.88991	3.35885			J	4	1.66305	2.68327	3.40036	3.94833	3.41835	0.255055	0
J	5	Sample X221	28772	32834	34886	35369	36095			J	5	0.902403	1.22762	1.42318	1.4729	1.55056			J	5	0.881639	1.2032	1.36729	1.43244	1.54029	0.0803894	0
J	6	Sample X222	34943	44629	49124	50435	52828			J	6	1.42897	2.84131	4.01669	4.47965	5.54556			J	6	1.48537	2.9012	4.07772	4.53806	5.60506	0.353958	0
J	7	Sample X223	23191	28028	28371	29713	31289			J	7	0.553929	0.850182	0.874007	0.971435	1.0952			J	7	0.533165	0.825763	0.818117	0.930976	1.08493	0.0731495	0
J	8	Sample X224	24664	33106	37482	40522	42344			J	8	0.636978	1.25218	1.70955	2.11628	2.40812			J	8	0.693376	1.31207	1.77058	2.1747	2.46762	0.154673	0
J	9	Sample X225	20437	25459	27361	27793	29486			J	9	0.412753	0.684248	0.805033	0.8341	0.954466			J	9	0.391989	0.659828	0.749142	0.793641	0.944191	0.06696	0
J	10	Sample X226	24851	37459	41615	41240	44641			J	10	0.647936	1.70679	2.28632	2.22635	2.84382			J	10	0.704335	1.76668	2.34736	2.28477	2.90332	0.265587	0
J	11	Sample X227	18581	22855	24356	25967	27051			J	11	0.326668	0.535762	0.619138	0.715412	0.784562			J	11	0.305904	0.511343	0.563248	0.674953	0.774287	0.0513596	0
J	12	Sample X228	23594	33212	36811	39618	41662			J	12	0.576091	1.26186	1.63081	1.9859	2.29396			J	12	0.632489	1.32175	1.69185	2.04431	2.35346	0.172315	0
J	13	Sample X229	17042	20167	21700	22409	23296			J	13	0.260138	0.399806	0.475366	0.512069	0.559664			J	13	0.239374	0.375386	0.419475	0.47161	0.549389	0.0340032	0
J	14	Sample X230	19437	27526	29842	31026	32335			J	14	0.365536	0.81606	0.981171	1.07379	1.18356			J	14	0.421935	0.875953	1.04221	1.13221	1.24306	0.113504	0
J	15	Sample X231	16717	18921	19523	20028	20713			J	15	0.246609	0.341941	0.369519	0.393198	0.426144			J	15	0.225845	0.317522	0.313628	0.352739	0.415869	0.0229192	0
J	16	Sample X232	20776	27681	28418	28617	29735			J	16	0.429223	0.826503	0.877305	0.891357	0.973091			J	16	0.485621	0.886396	0.93834	0.949775	1.03259	0.100194	0
J	17	Sample X233	12364	14222	14351	15283	15860			J	17	0.0809209	0.148299	0.153153	0.188946	0.211759			J	17	0.0601567	0.12388	0.0972627	0.148487	0.201484	0.0159307	0
J	18	Sample X234	14109	18552	18440	19665	20823			J	18	0.144066	0.325376	0.320398	0.376126	0.431525			J	18	0.200464	0.385269	0.381432	0.434545	0.491027	0.0462011	0
J	19	Sample X235	13216	14264	14361	14685	15112			J	19	0.11124	0.149877	0.153531	0.165834	0.182283			J	19	0.0904754	0.125458	0.09764	0.125375	0.172008	0.00874552	0
J	20	Sample X236	13368	15604	15658	16252	17005			J	20	0.11675	0.201574	0.203714	0.227554	0.258589			J	20	0.173148	0.261467	0.264749	0.285972	0.318091	0.0220797	0
J	21	Sample X237	10792	10903	11258	11769	11966			J	21	0.0273933	0.0310744	0.042946	0.0603024	0.0670797			J	21	0.00662907	0.00665528	-0.0129446	0.0198434	0.0568048	6.55328e-06	0
J	22	Sample X238	10318	10933	11818	11929	12801			J	22	0.0118358	0.0320719	0.0619836	0.0658031	0.0963526			J	22	0.0682344	0.0919649	0.123018	0.124222	0.155855	0.00593262	0
J	23	Sample X239	10591	10702	11640	11184	10270			J	23	0.0207642	0.0244192	0.0558906	0.0404589	0.0102749			J	23	0	0	0	0	0	0	0
J	24	Sample X240	8141	8025	7987	8074	8038			J	24	-0.0563986	-0.059893	-0.0610348	-0.0584186	-0.0595021			J	24	0	0	0	0	0	0	0
K	1	Sample X241	26399	28042	28296	28679	29001			K	1	0.742527	0.851147	0.868762	0.895764	0.918888			K	1	0.727758	0.832188	0.8519	0.878805	0.900913	0.0261076	0
K	2	Sample X242	38081	46143	49905	51995	53628			K	2	1.78293	3.18062	4.28393	5.13594	5.987			K	2	1.67219	3.07003	4.17385	5.02626	5.87608	0.349458	0
K	3	Sample X243	20089	21271	20285	21142	21401			K	3	0.396093	0.45371	0.405446	0.447278	0.46023			K	3	0.381323	0.434752	0.388584	0.430318	0.442255	0.0133572	0
K	4	Sample X244	37318	51424	53054	59266	61473			K	4	1.68998	4.88047	5.66513	11.6877	17.0867			K	4	1.57924	4.76988	5.55505	11.578	16.9757	0.797659	1
K	5	Sample X245	16461	17260	17385	17744	18118			K	5	0.236075	0.269312	0.274608	0.289969	0.306212			K	5	0.221305	0.250353	0.257747	0.27301	0.288237	0.00726197	0
K	6	Sample X246	27947	38938	44150	46494	48661			K	6	0.844617	1.89336	2.74332	3.26643	3.869			K	6	0.733884	1.78277	2.63324	3.15675	3.75809	0.262221	0
K	7	Sample X247	13653	15083	13905	14647	14851			K	7	0.127166	0.181157	0.13647	0.164383	0.172196			K	7	0.112396	0.162198	0.119608	0.147423	0.154221	0.0124505	0
K	8	Sample X248	28433	41412	46517	48294	52766			K	8	0.878359	2.25364	3.27216	3.75713	5.51342			K	8	0.767625	2.14305	3.16208	3.64744	5.40251	0.343857	0
K	9	Sample X249	12946	13665	13157	13596	13789			K	9	0.101528	0.127607	0.109109	0.125074	0.132176			K	9	0.0867584	0.108649	0.0922474	0.108114	0.114201	0.00547257	0
K	10	Sample X250	23585	35524	39709	40401	44252			K	10	0.575591	1.48918	1.99863	2.09831	2.76384			K	10	0.464857	1.37859	1.88855	1.98863	2.65293	0.228434	0
K	11	Sample X251	11501	11786	11114	11050	11276			K	11	0.0511598	0.0608853	0.0381123	0.035972	0.043552			K	11	0.0363901	0.0419268	0.0212506	0.0190121	0.025577	0.00138419	0
K	12	Sample X252	21360	29301	32651	35281	37422			K	12	0.45817	0.940787	1.21131	1.46373	1.70236			K	12	0.347436	0.830198	1.10123	1.35404	1.59145	0.12069	0
K	13	Sample X253	11480	11499	11628	11390	11616			K	13	0.0504471	0.0510919	0.0554813	0.0473989	0.0550721			K	13	0.0356774	0.0321334	0.0386195	0.030439	0.037097	-0.000885999	0
K	14	Sample X254	18578	24448	27154	28152	29201			K	14	0.326535	0.62444	0.791328	0.858747	0.933448			K	14	0.215801	0.513851	0.681245	0.74906	0.822534	0.0745125	0
K	15	Sample X255	11175	11706	10898	11107	11099			K	15	0.0401569	0.0581452	0.0309083	0.037878	0.0376103			K	15	0.0253872	0.0391867	0.0140466	0.0209181	0.0196352	0.00344989	0
K	16	Sample X256	16023	20721	21235	21633	23306			K	16	0.218297	0.426534	0.451912	0.471957	0.560212			K	16	0.107564	0.315945	0.341828	0.362271	0.449297	0.0520953	0
K	17	Sample X257	10111	9995	9824	9643	9614			K	17	0.00512308	0.00138267	-0.00410354	-0.00987494	-0.0107963			K	17	-0.00964664	-0.0175758	-0.0209653	-0.0268349	-0.0287713	-0.0019823	0
K	18	Sample X258	15536	18700	18771	18832	20156			K	18	0.198886	0.331989	0.335176	0.337922	0.399281			K	18	0.0881524	0.2214	0.225093	0.228236	0.288367	0.0333119	0
K	19	Sample X259	10388	10593	10363	10385	10436			K	19	0.0141169	0.0208299	0.0133016	0.0140191	0.0156844			K	19	-0.000652784	0.00187143	-0.00356013	-0.00294085	-0.00229065	0.000631053	0
K	20	Sample X260	13284	14474	15087	15713	16241			K	20	0.113701	0.157804	0.181312	0.205898	0.227107			K	20	0.0029672	0.0472151	0.0712286	0.096212	0.116193	0.011062	0
K	21	Sample X261	11026	10951	10895	10994	11080			K	21	0.0351707	0.0326708	0.0308086	0.0341032	0.0369747			K	21	0.0204009	0.0137123	0.0139469	0.0171433	0.0189996	-0.00167215	0
K	22	Sample X262	13906	14518	15257	15209	15706			K	22	0.136507	0.159473	0.18793	0.186057	0.20562			K	22	0.0257729	0.0488841	0.0778465	0.0763706	0.0947059	0.0057778	0
K	23	Sample X263	10408	10536	10472	10475	10506			K	23	0.0147697	0.0189585	0.0168617	0.0169599	0.017975			K	23	0	0	0	0	0	0	0
K	24	Sample X264	13202	13198	13184	13173	13207			K	24	0.110734	0.110589	0.110084	0.109686	0.110914			K	24	0	0	0	0	0	0	0
L	1	Sample X265	35306	37853	36442	37335	37813			L	1	1.46633	1.75464	1.58898	1.692	1.74972			L	1	1.43811	1.72612	1.56697	1.66711	1.72365	0.0720032	0
L	2	Sample X266	45041	49248	50278	50663	50630			L	2	2.92901	4.05755	4.42038	4.56775	4.55484			L	2	2.97212	4.10157	4.46655	4.61312	4.60003	0.282364	0
L	3	Sample X267	27350	28731	29877	30241	28439			L	3	0.804301	0.899472	0.983825	1.01172	0.878781			L	3	0.77608	0.870953	0.961811	0.986837	0.852711	0.0237183	0
L	4	Sample X268	33257	37822	37838	38213	38844			L	4	1.26598	1.75083	1.7528	1.79951	1.88091			L	4	1.30909	1.79486	1.79896	1.84488	1.92611	0.121441	0
L	5	Sample X269	24199	27630	28427	29768	30594			L	5	0.610143	0.823058	0.877937	0.975578	1.0393			L	5	0.581922	0.794538	0.855923	0.950697	1.01323	0.053154	0
L	6	Sample X270	31940	38355	40004	39889	40491			L	6	1.14957	1.81751	2.0405	2.02407	2.11166			L	6	1.19268	1.86154	2.08667	2.06944	2.15685	0.167215	0
L	7	Sample X271	22107	26462	26244	28548	29501			L	7	0.496294	0.74653	0.732732	0.886468	0.955581			L	7	0.468073	0.718011	0.710718	0.861587	0.92951	0.0624845	0
L	8	Sample X272	23770	28981	28817	30034	31847			L	8	0.585899	0.91744	0.905627	0.995788	1.14168			L	8	0.629008	0.961468	0.951795	1.04116	1.18687	0.0831151	0
L	9	Sample X273	17971	21888	22402	23885	25164			L	9	0.299799	0.484986	0.511701	0.59235	0.666498			L	9	0.271578	0.456467	0.489687	0.567469	0.640427	0.0462223	0
L	10	Sample X274	20124	24489	23534	26107	27901			L	10	0.397757	0.62681	0.572765	0.724137	0.841467			L	10	0.440867	0.670838	0.618933	0.76951	0.886657	0.0574928	0
L	11	Sample X275	17644	20781	21653	22985	23847			L	11	0.285668	0.429467	0.472974	0.542758	0.590215			L	11	0.257447	0.400948	0.45096	0.517877	0.564144	0.0358753	0
L	12	Sample X276	16628	18925	20111	21320	22482			L	12	0.242935	0.342122	0.397139	0.456163	0.515915			L	12	0.286044	0.38615	0.443307	0.501537	0.561105	0.0250264	0
L	13	Sample X277	15051	17047	18287	18622	19452			L	13	0.179916	0.260347	0.313634	0.328499	0.36623			L	13	0.151695	0.231828	0.29162	0.303618	0.34016	0.0200333	0
L	14	Sample X278	13423	15506	15603	16846	17824			L	14	0.118751	0.197702	0.201535	0.251958	0.293423			L	14	0.161861	0.24173	0.247703	0.297332	0.338614	0.0199674	0
L	15	Sample X279	13441	15284	15724	16581	17256			L	15	0.119407	0.188985	0.206336	0.241	0.269143			L	15	0.0911862	0.160466	0.184322	0.216118	0.243072	0.0173199	0
L	16	Sample X280	11569	12522	12993	13755	14342			L	16	0.0534712	0.0864718	0.103212	0.130921	0.152814			L	16	0.0965807	0.1305	0.14938	0.176295	0.198004	0.00847981	0
L	17	Sample X281	12778	13581	14052	14709	14972			L	17	0.0955342	0.124524	0.141937	0.166751	0.17686			L	17	0.0673132	0.0960049	0.119924	0.14187	0.15079	0.00717293	0
L	18	Sample X282	11978	12518	12787	13153	13440			L	18	0.0674941	0.0863309	0.0958544	0.108965	0.119371			L	18	0.110604	0.130359	0.142022	0.154339	0.164561	0.00493886	0
L	19	Sample X283	11816	12519	12509	12805	13176			L	19	0.0619149	0.0863661	0.0860139	0.096495	0.109795			L	19	0.0336938	0.0578468	0.064	0.0716139	0.0837245	0.00603825	0
L	20	Sample X284	10493	10587	10775	10858	11045			L	20	0.0175492	0.0206327	0.0268308	0.0295803	0.035805			L	20	0.0606587	0.0646609	0.0729987	0.0749541	0.0809954	0.00100055	0
L	21	Sample X285	10840	10981	11192	11527	11679			L	21	0.0289833	0.03367	0.0407275	0.0520429	0.0572222			L	21	0.000762252	0.00515067	0.0187137	0.0271617	0.031152	0.0010971	0
L	22	Sample X286	8870	8879	8832	8893	8938			L	22	-0.0341185	-0.0338399	-0.0352936	-0.0334064	-0.0320117			L	22	0.00899102	0.0101882	0.0108743	0.0119673	0.0131787	0.000299301	0
L	23	Sample X287	10817	10826	10629	10716	10752			L	23	0.0282211	0.0285193	0.0220138	0.0248812	0.0260703			L	23	0	0	0	0	0	0	0
L	24	Sample X288	8578	8548	8478	8504	8510			L	24	-0.0431095	-0.0440281	-0.046168	-0.0453738	-0.0451904			L	24	0	0	0	0	0	0	0
M	1	Sample X289	23593	27119	27452	28150	28322			M	1	0.576035	0.789025	0.811103	0.858608	0.870578			M	1	0.654169	0.874403	0.897094	0.946319	0.958522	0.0550586	0
M	2	Sample X290	43093	50220	50863	50886	51117			M	2	2.54099	4.39876	4.64708	4.65633	4.7507			M	2	2.47598	4.33949	4.5853	4.59575	4.68944	0.465877	1
M	3	Sample X291	25967	25546	24658	24819	25399			M	3	0.715412	0.689531	0.636628	0.646054	0.680617			M	3	0.793545	0.774908	0.722619	0.733765	0.768561	-0.00465928	0
M	4	Sample X292	38284	42849	44031	44967	44990			M	4	1.80849	2.4968	2.71961	2.91302	2.91798			M	4	1.74348	2.43752	2.65784	2.85244	2.85671	0.173512	0
M	5	Sample X293	18442	18816	18087	18959	19013			M	5	0.320486	0.337201	0.304857	0.343661	0.346111			M	5	0.39862	0.422579	0.390847	0.431372	0.434055	0.00598982	0
M	6	Sample X294	29838	34678	37053	37256	38389			M	6	0.980869	1.40223	1.6588	1.68263	1.82185			M	6	0.915858	1.34295	1.59702	1.62206	1.76059	0.106773	0
M	7	Sample X295	15534	15656	14951	15585	15707			M	7	0.198807	0.203635	0.176049	0.200823	0.20566			M	7	0.276941	0.289013	0.26204	0.288534	0.293604	0.00301799	0
M	8	Sample X296	22757	27259	26763	28691	29974			M	8	0.530515	0.798262	0.765827	0.896619	0.991204			M	8	0.465504	0.738987	0.704049	0.836043	0.929941	0.0683708	0
M	9	Sample X297	13653	13462	12714	13284	13430			M	9	0.127166	0.120173	0.0932606	0.113701	0.119006			M	9	0.2053	0.205551	0.179251	0.201412	0.206951	6.27781e-05	0
M	10	Sample X298	18225	21434	20706	23218	24235			M	10	0.310905	0.461891	0.425802	0.555401	0.6122			M	10	0.245895	0.402616	0.364025	0.494825	0.550937	0.0391803	0
M	11	Sample X299	12769	12226	11584	12002	12101			M	11	0.0952142	0.0760989	0.0539818	0.0683234	0.0717521			M	11	0.173348	0.161477	0.139973	0.156035	0.159696	-0.00296779	0
M	12	Sample X300	15857	17280	18457	19507	20291			M	12	0.211639	0.270157	0.321152	0.368777	0.405733			M	12	0.146629	0.210883	0.259374	0.3082	0.34447	0.0160635	0
M	13	Sample X301	11418	11379	11157	11044	11015			M	13	0.0483462	0.047027	0.0395531	0.0357716	0.0348036			M	13	0.12648	0.132405	0.125544	0.123483	0.122748	0.00148124	0
M	14	Sample X302	13941	15971	15778	16246	17244			M	14	0.137806	0.216207	0.208486	0.22731	0.268636			M	14	0.0727954	0.156932	0.146708	0.166734	0.207373	0.0210343	0
M	15	Sample X303	10002	10148	9482	9614	9726			M	15	0.00160795	0.00631936	-0.0149781	-0.0107963	-0.00723292			M	15	0.0797415	0.091697	0.0710127	0.0769149	0.0807112	0.00298888	0
M	16	Sample X304	12847	14188	13665	14258	14894			M	16	0.0979915	0.147023	0.127607	0.149651	0.173851			M	16	0.0329811	0.0877486	0.0658296	0.0890744	0.112588	0.0136919	0
M	17	Sample X305	11399	10976	10912	10877	10761			M	17	0.0477033	0.0335034	0.0313736	0.0302109	0.0263678			M	17	0.125837	0.118881	0.117364	0.117922	0.114312	-0.00173895	0
M	18	Sample X306	12977	13162	13263	13536	13736			M	18	0.102638	0.10929	0.11294	0.122877	0.130221			M	18	0.0376278	0.050015	0.0511626	0.0622999	0.0689579	0.00309678	0
M	19	Sample X307	10570	10148	10047	10122	10255			M	19	0.0200743	0.00631936	0.00305752	0.00547857	0.00978763			M	19	0.0982078	0.091697	0.0890483	0.0931897	0.0977317	-0.00162771	0
M	20	Sample X308	13293	13023	13261	13353	13416			M	20	0.114027	0.104288	0.112868	0.116205	0.118496			M	20	0.0490167	0.0450133	0.0510901	0.055628	0.0572337	-0.00100086	0
M	21	Sample X309	10673	10228	10146	10203	10139			M	21	0.0234629	0.00891122	0.00625465	0.00810048	0.00602823			M	21	0.101596	0.0942889	0.0922454	0.0958116	0.0939723	-0.00182688	0
M	22	Sample X310	12397	12139	12171	12281	12390			M	22	0.0820776	0.0730714	0.0741839	0.0780178	0.0818322			M	22	0.0170673	0.0137969	0.0124063	0.0174412	0.0205695	-0.000817596	0
M	23	Sample X311	7412	7165	7144	7085	7077			M	23	-0.0781335	-0.0853776	-0.0859908	-0.0877111	-0.0879441			M	23	0	0	0	0	0	0	0
M	24	Sample X312	11906	11739	11812	11777	11797			M	24	0.0650104	0.0592746	0.0617776	0.0605767	0.0612627			M	24	0	0	0	0	0	0	0
N	1	Sample X313	17694	18408	18817	18654	18113			N	1	0.287817	0.318979	0.337246	0.329929	0.305994			N	1	0.228884	0.265576	0.289442	0.277003	0.250547	0.00917297	0
N	2	Sample X314	15985	15951	15757	15898	16408			N	2	0.216769	0.215404	0.207649	0.21328	0.233907			N	2	0.153274	0.163565	0.156761	0.162833	0.182306	0.00257289	0
N	3	Sample X315	14240	14758	14971	14502	14291			N	3	0.148975	0.168627	0.176821	0.158866	0.150892			N	3	0.0900425	0.115224	0.129016	0.105939	0.0954452	0.00629528	0
N	4	Sample X316	14514	14993	14825	14712	14670			N	4	0.159321	0.177671	0.171197	0.166866	0.165261			N	4	0.0958257	0.125832	0.120309	0.116419	0.113659	0.00750166	0
N	5	Sample X317	12630	12890	12900	12476	12573			N	5	0.0902846	0.099526	0.0998833	0.0848524	0.0882704			N	5	0.0313524	0.0461229	0.0520785	0.0319256	0.0328232	0.00369263	0
N	6	Sample X318	6256	6479	6526	6481	6487			N	6	-0.11153	-0.105187	-0.103844	-0.10513	-0.104958			N	6	-0.175026	-0.157026	-0.154732	-0.155577	-0.15656	0.00449995	0
N	7	Sample X319	12786	13069	12013	12238	12515			N	7	0.0958188	0.10594	0.0687037	0.0765173	0.0862252			N	7	0.0368866	0.0525371	0.020899	0.0235904	0.030778	0.00391261	0
N	8	Sample X320	12175	12716	11823	11567	12049			N	8	0.074323	0.0933316	0.0621553	0.0534031	0.0699496			N	8	0.0108272	0.0414926	0.0112671	0.002956	0.0183484	0.00766633	0
N	9	Sample X321	11807	12132	10999	11460	11523			N	9	0.0616059	0.0728282	0.0342699	0.0497689	0.051907			N	9	0.00267372	0.0194251	-0.0135348	-0.00315793	-0.00354018	0.00418785	0
N	10	Sample X322	12240	12667	11347	11916	12208			N	10	0.076587	0.0915943	0.045946	0.0653549	0.0754717			N	10	0.0130912	0.0397553	-0.00494219	0.0149078	0.0238705	0.00666602	0
N	11	Sample X323	12912	12887	12288	12354	12406			N	11	0.100312	0.0994189	0.0782623	0.0805707	0.0823933			N	11	0.0413799	0.0460158	0.0304575	0.0276439	0.0269462	0.00115897	0
N	12	Sample X324	12047	11601	11642	11599	11569			N	12	0.0698804	0.0545609	0.0559588	0.0544927	0.0534712			N	12	0.00638458	0.00272184	0.00507062	0.0040456	0.00186995	-0.000915685	0
N	13	Sample X325	10903	10877	10943	10965	11036			N	13	0.0310744	0.0302109	0.0324046	0.033137	0.0355045			N	13	-0.0278577	-0.0231922	-0.0154002	-0.0197899	-0.0199427	0.00116638	0
N	14	Sample X326	10765	11086	10586	10780	10774			N	14	0.0265	0.0371753	0.0205999	0.0269962	0.0267977			N	14	-0.0369957	-0.0146637	-0.0302883	-0.023451	-0.0248036	0.00558302	0
N	15	Sample X327	10835	10689	10606	10657	10700			N	15	0.0288176	0.0239904	0.0212573	0.0229357	0.0243532			N	15	-0.0301146	-0.0294128	-0.0265475	-0.0299911	-0.031094	0.000175464	0
N	16	Sample X328	10880	11148	10267	10774	10794			N	16	0.0303105	0.0392514	0.0101774	0.0267977	0.0274595			N	16	-0.0331853	-0.0125876	-0.0407108	-0.0236494	-0.0241418	0.00514941	0
N	17	Sample X329	12884	12549	12181	12218	12271			N	17	0.0993118	0.0874236	0.0745318	0.0758201	0.0776686			N	17	0.0403796	0.0340205	0.026727	0.0228933	0.0222215	-0.00158978	0
N	18	Sample X330	11527	11343	10822	11284	11311			N	18	0.0520429	0.045811	0.0283867	0.0438215	0.0447314			N	18	-0.0114529	-0.00602802	-0.0225015	-0.00662567	-0.00686983	0.00135622	0
N	19	Sample X331	10997	10846	10877	10889	10850			N	19	0.0342033	0.0291823	0.0302109	0.0306093	0.0293149			N	19	-0.0247289	-0.0242208	-0.0175939	-0.0223175	-0.0261322	0.000127025	0
N	20	Sample X332	11434	11199	11080	10977	11132			N	20	0.0488879	0.0409625	0.0369747	0.0335367	0.0387152			N	20	-0.0146079	-0.0108765	-0.0139136	-0.0169104	-0.012886	0.000932846	0
N	21	Sample X333	11661	11579	11707	11795	11750			N	21	0.0566074	0.0538116	0.0581794	0.0611941	0.0596513			N	21	-0.00232479	0.000408452	0.0103746	0.00826726	0.00420414	0.00068331	0
N	22	Sample X334	11872	11530	11575	11499	11546			N	22	0.0638398	0.0521448	0.0536754	0.0510919	0.0526888			N	22	0.000344017	0.000305815	0.00278717	0.000644772	0.00108752	-9.55048e-06	0
N	23	Sample X335	11729	11567	11402	11553	11627			N	23	0.0589322	0.0534031	0.0478048	0.0529268	0.0554471			N	23	0	0	0	0	0	0	0
N	24	Sample X336	11862	11521	11493	11480	11514			N	24	0.0634958	0.051839	0.0508882	0.0504471	0.0516012			N	24	0	0	0	0	0	0	0
O	1	Sample X337	15100	15432	15392	14979	14656			O	1	0.181817	0.194788	0.193217	0.17713	0.164726			O	1	0.18127	0.197003	0.199748	0.180146	0.168734	0.00393308	0
O	2	Sample X338	13690	13857	13732	13537	13694			O	2	0.128527	0.134691	0.130073	0.122913	0.128674			O	2	0.048726	0.0720887	0.0648561	0.0545897	0.061007	0.00584068	0
O	3	Sample X339	10182	10304	10145	9787	9730			O	3	0.00742001	0.0113803	0.0062223	-0.0052863	-0.0071054			O	3	0.00687362	0.0135946	0.0127536	-0.00227097	-0.00309782	0.00168025	0
O	4	Sample X340	13731	13570	13325	13140	13259			O	4	0.130036	0.124121	0.115188	0.108496	0.112795			O	4	0.0502357	0.0615193	0.0499708	0.0401728	0.0451285	0.00282088	0
O	5	Sample X341	12116	12462	11610	11740	11761			O	5	0.0722726	0.0843601	0.0548676	0.0593088	0.0600282			O	5	0.0717263	0.0865744	0.0613989	0.0623241	0.0640358	0.00371204	0
O	6	Sample X342	10641	10973	10697	10806	10932			O	6	0.0224088	0.0334034	0.0242542	0.0278567	0.0320386			O	6	-0.0573918	-0.0291985	-0.0409629	-0.0404666	-0.0356282	0.00704833	0
O	7	Sample X343	6629	6807	6531	6645	6583			O	7	-0.100894	-0.0957717	-0.103701	-0.100435	-0.102213			O	7	-0.10144	-0.0935573	-0.0971696	-0.0974193	-0.098205	0.00197071	0
O	8	Sample X344	11384	11607	10817	11242	11216			O	8	0.0471961	0.0547653	0.0282211	0.0424077	0.0415336			O	8	-0.0326046	-0.0078366	-0.036996	-0.0259157	-0.0261331	0.00619199	0
O	9	Sample X345	9407	9443	9143	9307	9228			O	9	-0.0173456	-0.01621	-0.0256304	-0.0204927	-0.0229712			O	9	-0.017892	-0.0139956	-0.019099	-0.0174774	-0.0189636	0.000974092	0
O	10	Sample X346	10639	10853	10603	10739	10694			O	10	0.0223429	0.0294144	0.0211586	0.0256407	0.0241553			O	10	-0.0574577	-0.0331875	-0.0440585	-0.0426827	-0.0435115	0.00606755	0
O	11	Sample X347	10740	10372	10635	10686	10586			O	11	0.0256737	0.013595	0.0222113	0.0238914	0.0205999			O	11	0.0251273	0.0158094	0.0287426	0.0269068	0.0246075	-0.00232949	0
O	12	Sample X348	10725	10739	10341	10407	10456			O	12	0.0251783	0.0256407	0.0125847	0.0147371	0.0163383			O	12	-0.0546223	-0.0369612	-0.0526324	-0.0535863	-0.0513285	0.00441527	0
O	13	Sample X349	9708	9845	9810	9621	9776			O	13	-0.00780653	-0.00343156	-0.00455125	-0.010574	-0.00563763			O	13	-0.00835292	-0.00121721	0.00198008	-0.00755863	-0.00163006	0.00178393	0
O	14	Sample X350	11147	11012	10895	11061	11019			O	14	0.0392179	0.0347035	0.0308086	0.0363395	0.0349371			O	14	-0.0405828	-0.0278984	-0.0344085	-0.0319839	-0.0327297	0.00317109	0
O	15	Sample X351	10914	11037	10955	10964	10976			O	15	0.03144	0.0355379	0.032804	0.0331036	0.0335034			O	15	0.0308937	0.0377522	0.0393353	0.036119	0.0375109	0.00171464	0
O	16	Sample X352	10910	11357	10749	11046	11069			O	16	0.0313071	0.0462837	0.0259711	0.0358384	0.0366069			O	16	-0.0484935	-0.0163182	-0.039246	-0.032485	-0.0310599	0.00804384	0
O	17	Sample X353	7569	7785	7437	7574	7512			O	17	-0.0734977	-0.0670795	-0.077397	-0.0733496	-0.0751836			O	17	-0.074044	-0.0648651	-0.0708656	-0.0703343	-0.071176	0.00229473	0
O	18	Sample X354	11455	11337	11349	11467	11477			O	18	0.0495994	0.0456085	0.0460136	0.0500062	0.0503454			O	18	-0.0302012	-0.0169934	-0.0192035	-0.0183172	-0.0173214	0.00330194	0
O	19	Sample X355	10698	10676	10514	10594	10641			O	19	0.0242872	0.0235617	0.0182372	0.0208628	0.0224088			O	19	0.0237408	0.0257761	0.0247685	0.0238781	0.0264164	0.000508821	0
O	20	Sample X356	11467	11446	11083	11208	11254			O	20	0.0500062	0.0492944	0.037075	0.0412648	0.0428114			O	20	-0.0297944	-0.0133075	-0.0281421	-0.0270586	-0.0248553	0.00412173	0
O	21	Sample X357	10203	9855	9933	9964	9950			O	21	0.00810048	-0.0031114	-0.000610283	0.000385651	-6.42594e-05			O	21	0.00755409	-0.000897051	0.00592105	0.00340098	0.00394331	-0.00211279	0
O	22	Sample X358	12238	12204	12078	12213	12260			O	22	0.0765173	0.0753324	0.0709544	0.0756459	0.0772847			O	22	-0.00328336	0.0127305	0.0057373	0.00732253	0.00961792	0.00400347	0
O	23	Sample X359	9969	9883	9748	9858	9827			O	23	0.000546387	-0.00221435	-0.00653134	-0.00301533	-0.00400757			O	23	0	0	0	0	0	0	0
O	24	Sample X360	12332	11836	11912	12002	11983			O	24	0.0798006	0.0626019	0.0652171	0.0683234	0.0676668			O	24	0	0	0	0	0	0	0
P	1	Sample X361	51121	50483	50101	50132	50075			P	1	50382.4	48167						P	1	50382.4	48167	0	0	0		1			19709.9	0
P	2	Sample X362	49158	48408	48028	47730	47511			P	2								P	2	0	0	0	0	0
P	3	Sample X363	43476	43436	43373	43462	43596			P	3	43468.6	40811.2						P	3	43468.6	40811.2	0	0	0		0.5			16856	0
P	4	Sample X364	40582	40648	40965	40984	40877			P	4								P	4	0	0	0	0	0
P	5	Sample X365	31462	31270	31250	31303	31343			P	5	31325.6	31189.8						P	5	31325.6	31189.8	0	0	0		0.25			12503.1	0
P	6	Sample X366	31525	31291	31137	31098	30898			P	6								P	6	0	0	0	0	0		0
P	7	Sample X367	22230	22066	22024	22024	22000			P	7	22068.8	21266.8						P	7	22068.8	21266.8	0	0	0		0.125			8667.12	0
P	8	Sample X368	21602	21357	21191	21149	21035			P	8								P	8	0	0	0	0	0
P	9	Sample X369	14958	14887	14882	14912	14938			P	9	14915.4	15342						P	9	14915.4	15342	0	0	0		0.0625			6051.48	0
P	10	Sample X370	15691	15372	15270	15236	15141			P	10								P	10	0	0	0	0	0
P	11	Sample X371	15754	15734	15735	15726	15787			P	11	15747.2	16405.2						P	11	15747.2	16405.2	0	0	0		0.03125			6430.48	0
P	12	Sample X372	16606	16442	16379	16301	16298			P	12								P	12	0	0	0	0	0
P	13	Sample X373	11109	11122	11078	11096	11108			P	13	11102.6	11113.6						P	13	11102.6	11113.6	0	0	0		0.015625			4443.24	0
P	14	Sample X374	11384	11158	11049	11001	10976			P	14								P	14	0	0	0	0	0
P	15	Sample X375	10340	10078	10006	10057	10459			P	15	10188	11673.6						P	15	10188	11673.6	0	0	0		0			4372.32	0
P	16	Sample X376	11477	11743	11777	11665	11706			P	16								P	16	0	0	0	0	0
P	17	Sample X377	7322	7260	7126	6984	7004			P	17								P	17	0	0	0	0	0
P	18	Sample X378	6512	6386	6253	6174	6058			P	18								P	18	0	0	0	0	0
P	19	Sample X379	7320	7320	7206	6888	7015			P	19								P	19	0	0	0	0	0
P	20	Sample X380	7003	6952	6870	6762	6641			P	20								P	20	0	0	0	0	0
P	21	Sample X381	7850	7775	7585	7406	7235			P	21								P	21	0	0	0	0	0
P	22	Sample X382	5417	5677	5491	5489	5164			P	22								P	22	0	0	0	0	0
P	23	Sample X383	8186	8422	8036	7818	7543			P	23								P	23	0	0	0	0	0
P	24	Sample X384	4509	4742	4479	4340	4260			P	24								P	24	0	0	0	0	0
[truncated: 12 more columns]
