# Supplementary material for: PDZ-directed substrate recruitment is the primary determinant of specific 4E-BP1 dephosphorylation by PP1-Neurabin
Source: eLife journal article supplement (doi:10.7554/elife.103403), 2024-11-20
Supplement: fig5-data1 [file replicate3.xlsx]

## Sheet: All Cycles
Well Row	Well Col	Content	Raw Data (425-10/460-20)	Raw Data (425-10/460-20)	Raw Data (425-10/460-20)				convert to phosphate	Well Row	Well Col	Raw Data (425-10/460-20)	Raw Data (425-10/460-20)	Raw Data (425-10/460-20)				normalize to the lasst column	Well Row	Well Col	Raw Data (425-10/460-20)	Raw Data (425-10/460-20)	Raw Data (425-10/460-20)								PP1-Neb 0.25 nM
		Time [s]	0	240	480							0	4	8							0	4	8								4ebp-pdz	4ebp-sgs	irsp53-pdz	irsp53-sgs	L5A-PDZ	L5A-SGS	V1	V2	V3	V4	V5	V6	V7	V8			4ebp-pdz	4ebp-sgs	irsp53-pdz
A	1	Sample X1	24614	37508	39988				0.634064	A	1	1.03247	3.05753	3.74625					A	1	0.273018	2.3624	3.19955		0.209289	0.365817	0			600	0.365817	0.15339	0.255895	0.236962	0.120671	0.0282116	0.123681	0.43105	0.169245	0.187121	0.235599	-0.0441289	0.355902	-0.0552453			0.854567	0.0517736	0.330753
A	2	Sample X2	21463	40337	47457					A	2	0.743636	3.85712	7.46572					A	2	0.103721	3.41435	6.94026		0.881477	0.854567	0			300	0.714433	0.129214	1.2467	0.552187	0.254557	0.09662	0.226589	1.13903	0.359509	0.330292	0.349305	0.530053	0.387751	0.295656			0.933388	0.055681	0.697764
A	3	Sample X3	25451	38571	46295					A	3	1.11805	3.33322	6.62076					A	3	0.358597	2.63808	6.07406		0.858994	0.714433	0			150	0.705783	0.130064	2.03551	0.249027	1.10548	0.174526	0.317387	1.60122	0.347506	0.325098	0.480421	1.23188	0.606292	0.211052			0.338802	0.0129394	2.2949
A	4	Sample X4	23790	41091	48431					A	4	0.952085	4.11061	8.30474					A	4	0.31217	3.66784	7.77927		1.02786	0.933388	0			75	0.705236	0.116866	4.54106	0.136332	3.86107	0.0918213	0.398401	1.31364	0.416262	0.447124	0.245773	14.3865	0.449792	0.165724			0.236652	0.0031046	1.20718
A	5	Sample X5	28709	40612	46742					A	5	1.49476	3.94729	6.92827					A	5	0.735306	3.25215	6.38157		0.782354	0.705783	0			37.5	0.904926	0.081946	2.95212	0.0850356	2.79712	0.0559324	0.413993	3.43952	0.489138	0.33821	0.32844	5.23892	0.441301	0.183799			0.133344	-0.0246458	0.956531
A	6	Sample X6	18112	32124	37599					A	6	0.484148	1.98414	3.08011					A	6	-0.155766	1.54138	2.55465		0.253318	0.338802	0			18.75	0.681313	0.0475361	4.85743	0.0435948	3.69193	0.0228032	0.491823	1.48095	0.372199	0.28081	0.27958	7.32211	0.737499	0.199546			0.0256138	-0.0153445	0.835234
A	7	Sample X7	24025	40941	45961					A	7	0.974635	4.05858	6.40377					A	7	0.215183	3.36345	5.85707		0.623405	0.705236	0			9.375	0.406694	0.0618072	0.904546	0.0258125	0.771263	0.0169896	0.297027	0.544832	0.323572	0.275097	0.314633	2.48581	1.4943	0.218196			0.021484	-0.00901032	0.46099
A	8	Sample X8	21825	31278	35263					A	8	0.774394	1.85206	2.55316					A	8	0.13448	1.4093	2.0277		0.1546	0.236652	0			4.6875	0.230919	0.0518013	0.767706	-0.00367677	0.644168	0.0130668	0.223341	0.597726	0.238296	0.141399	0.32238	1.14836	0.377115	0.246279			0.0149706	0.00337033	0.470401
A	9	Sample X9	23872	39358	48080					A	9	0.95992	3.55561	7.98658					A	9	0.200468	2.86048	7.43988		1.14485	0.904926	0			2.34375	0.198177	0.0645608	0.455471	-0.00684479	0.411978	0.00694772	0.210516	0.341263	0.193157	0.078423	0.138402	0.456824	0.303341	0.162737			0.0119129	-0.00678209	0.40285
A	10	Sample X10	18462	22806	28447					A	10	0.509293	0.860757	1.46159					A	10	-0.130622	0.417988	0.936126		0.129535	0.133344	0			1.17188	0.069409	0.0465092	0.222187	-0.00105699	0.175882	0.00678598	0.0940059	0.286709	0.0854182	0.00354465	0.0501389	0.28515	0.144191	0.0723537			-0.0191327	-0.0320851	0.13915
A	11	Sample X11	24084	38976	45662					A	11	0.980343	3.44559	6.21809					A	11	0.220891	2.75045	5.67139		0.730235	0.681313	0			0.585938	0.0737345	0.0262849	0.173555	0.00408807	0.076575	0.0101792	0.0593414	0.089503	0.0701869	0.00321996	0.0133373	0.171564	0.090855	0.0639899			0.0181604	-0.0452178	0.0348656
A	12	Sample X12	17045	18013	18340					A	12	0.410022	0.477112	0.50048					A	12	-0.229892	0.0343429	-0.0249822		-0.0148313	0.0256138	0			0	0	0	0	0	0	0	0	0	0	0	0	0	0	0			0	0	0
A	13	Sample X13	21663	33443	40163					A	13	0.760558	2.20686	3.80136					A	13	0.00110527	1.51172	3.25466		0.435733	0.406694	0
A	14	Sample X14	15209	17880	16112					A	14	0.290739	0.467711	0.348159					A	14	-0.349175	0.0249423	-0.177303		-0.0505614	0.021484	0				3	27	51	75	99	123	147	171	195	219	243	267	291	315	339		3	27	51
A	15	Sample X15	20929	28380	34141					A	15	0.699304	1.45319	2.33391					A	15	-0.0601486	0.758061	1.78721		0.257287	0.230919	0				PP1-Neb 0.25 nM
A	16	Sample X16	15765	16152	15848					A	16	0.325817	0.350757	0.331129					A	16	-0.314098	-0.0920119	-0.194333		-0.0255804	0.0149706	0				4ebp-pdz	4ebp-sgs	irsp53-pdz	irsp53-sgs	L5A-PDZ	L5A-SGS	V1	V2	V3	V4	V5	V6	V7	V8			4ebp-pdz	4ebp-sgs	irsp53-pdz
A	17	Sample X17	24532	31869	34474					A	17	1.0243	1.9435	2.39697					A	17	0.264851	1.24836	1.85027		0.150476	0.198177	0		0	600	0.365817	0.15339	0.255895	0.236962	0.120671	0.0282116	0.123681	0.43105	0.169245	0.187121	0.235599	-0.0441289	0.355902	-0.0552453			0.854567	0.0517736	0.330753
A	18	Sample X18	15605	15797	15301					A	18	0.315632	0.327862	0.296483					A	18	-0.324282	-0.114907	-0.228979		-0.0285181	0.0119129	0		2	300	0.714433	0.129214	na	0.552187	0.254557	0.09662	0.226589	1.13903	0.359509	0.330292	0.349305	na	0.387751	0.295656			0.933388	0.055681	0.697764
A	19	Sample X19	19340	25371	23416					A	19	0.574274	1.10969	0.916794					A	19	-0.185178	0.414558	0.370094		-0.0111159	0.069409	0		4	150	0.705783	0.130064	na	0.249027	1.10548	0.174526	0.317387	na	0.347506	0.325098	0.480421	na	0.606292	0.211052			0.338802	0.0129394	na
A	20	Sample X20	19699	16285	15895					A	20	0.60166	0.35943	0.334146					A	20	-0.0382546	-0.0833386	-0.191317		-0.0269945	-0.0191327	0		6	75	0.705236	0.116866	na	0.136332	na	0.0918213	0.398401	1.31364	0.416262	0.447124	0.245773	na	0.449792	0.165724			0.236652	0.0031046	1.20718
A	21	Sample X21	16147	19742	21271					A	21	0.350432	0.604973	0.727556					A	21	-0.40902	-0.0901602	0.180856		0.067754	0.0737345	0		8	37.5	0.904926	0.081946	na	0.0850356	na	0.0559324	0.413993	na	0.489138	0.33821	0.32844	na	0.441301	0.183799			0.133344	-0.0246458	0.956531
A	22	Sample X22	22427	18588	22772					A	22	0.826857	0.518449	0.857688					A	22	0.186942	0.0756797	0.332225		0.0641364	0.0181604	0		10	18.75	0.681313	0.0475361	na	0.0435948	na	0.0228032	0.491823	na	0.372199	0.28081	0.27958	na	0.737499	0.199546			0.0256138	-0.0153445	0.835234
A	23	Sample X23	21650	20878	18972					A	23	0.759452	0.695133	0.5467					A	23	0	0	0		0	0	0		12	9.375	0.406694	0.0618072	0.904546	0.0258125	0.771263	0.0169896	0.297027	0.544832	0.323572	0.275097	0.314633	na	na	0.218196			0.021484	-0.00901032	0.46099
A	24	Sample X24	20190	17523	18684					A	24	0.639915	0.442769	0.525462					A	24	0	0	0		0	0	0		14	4.6875	0.230919	0.0518013	0.767706	-0.00367677	0.644168	0.0130668	0.223341	0.597726	0.238296	0.141399	0.32238	1.14836	0.377115	0.246279			0.0149706	0.00337033	0.470401
B	1	Sample X25	18169	24242	26824					B	1	0.488214	0.995721	1.26778					B	1	-0.285408	0.43986	0.941712		0.125463	0.15339	0		16	2.34375	0.198177	0.0645608	0.455471	-0.00684479	0.411978	0.00694772	0.210516	0.341263	0.193157	0.078423	0.138402	0.456824	0.303341	0.162737			0.0119129	-0.00678209	0.40285
B	2	Sample X26	14527	17833	19866					B	2	0.248884	0.464403	0.614566					B	2	-0.0653538	0.11566	0.348835		0.0582936	0.0517736	0		18	1.17188	0.069409	0.0465092	0.222187	-0.00105699	0.175882	0.00678598	0.0940059	0.286709	0.0854182	0.00354465	0.0501389	0.28515	0.144191	0.0723537			-0.0191327	-0.0320851	0.13915
B	3	Sample X27	19996	25668	26315					B	3	0.624688	1.14092	1.21085					B	3	-0.148935	0.585057	0.884778		0.0749303	0.129214	0		20	0.585938	0.0737345	0.0262849	0.173555	0.00408807	0.076575	0.0101792	0.0593414	0.089503	0.0701869	0.00321996	0.0133373	0.171564	0.090855	0.0639899			0.0181604	-0.0452178	0.0348656
B	4	Sample X28	15706	17786	21168					B	4	0.322053	0.461103	0.718995					B	4	0.00781486	0.11236	0.453263		0.0852258	0.055681	0		22	0	0	0	0	0	0	0	0	0	0	0	0	0	0	0			0	0	0
B	5	Sample X29	15911	22389	23537					B	5	0.335174	0.823496	0.928133					B	5	-0.438448	0.267635	0.60206		0.0836064	0.130064	0
B	6	Sample X30	16826	16862	17631					B	6	0.395261	0.397677	0.45027					B	6	0.0810232	0.0489341	0.184539		0.0339012	0.0129394	0
B	7	Sample X31	17430	21148	23490					B	7	0.43634	0.717338	0.92372					B	7	-0.337282	0.161476	0.597647		0.109043	0.116866	0
B	8	Sample X32	16939	18242	16585					B	8	0.402859	0.493438	0.379189					B	8	0.0886209	0.144695	0.113458		-0.00780938	0.0031046	0
B	9	Sample X33	14882	18588	18033					B	9	0.270513	0.518449	0.478531					B	9	-0.50311	-0.0374124	0.152459		0.0474677	0.081946	0
B	10	Sample X34	18616	16708	14952					B	10	0.520491	0.387369	0.274818					B	10	0.206253	0.0386264	0.00908649		-0.00738497	-0.0246458	0
B	11	Sample X35	16492	14767	15449					B	11	0.373035	0.263469	0.305773					B	11	-0.400588	-0.292392	-0.0202991		0.0680232	0.0475361	0
B	12	Sample X36	18059	17532	15502					B	12	0.480377	0.443393	0.309115					B	12	0.166139	0.0946495	0.0433835		-0.0128165	-0.0153445	0
B	13	Sample X37	15405	15161	16139					B	13	0.303005	0.287752	0.349912					B	13	-0.470618	-0.268109	0.02384		0.0729874	0.0618072	0
B	14	Sample X38	18556	16259	16830					B	14	0.516118	0.357731	0.395529					B	14	0.20188	0.0089876	0.129798		0.0302026	-0.00901032	0
B	15	Sample X39	13516	13100	12936					B	15	0.189097	0.165245	0.155958					B	15	-0.584525	-0.390616	-0.170114		0.0551254	0.0518013	0
B	16	Sample X40	15819	13537	15480					B	16	0.329271	0.190313	0.307727					B	16	0.0150327	-0.15843	0.0419954		0.0501064	0.00337033	0
B	17	Sample X41	14744	16258	15846					B	17	0.262065	0.357665	0.331001					B	17	-0.511558	-0.198196	0.00492838		0.050781	0.0645608	0
B	18	Sample X42	17618	14000	16088					B	18	0.449365	0.217391	0.346602					B	18	0.135128	-0.131352	0.0808708		0.0530557	-0.00678209	0
B	19	Sample X43	16893	16296	15741					B	19	0.399761	0.36015	0.324284					B	19	-0.373861	-0.195711	-0.00178789		0.0484808	0.0465092	0
B	20	Sample X44	19101	13935	14564					B	20	0.556309	0.213557	0.251122					B	20	0.242072	-0.135186	-0.014609		0.0301443	-0.0320851	0
B	21	Sample X45	19395	15593	16004					B	21	0.578439	0.314872	0.341167					B	21	-0.195184	-0.24099	0.0150952		0.0640212	0.0262849	0
B	22	Sample X46	20070	17566	14048					B	22	0.630478	0.445751	0.22023					B	22	0.316241	0.0970079	-0.0455017		-0.0356274	-0.0452178	0
B	23	Sample X47	21816	19095	15769					B	23	0.773622	0.555861	0.326072					B	23	0	0	0		0	0	0
B	24	Sample X48	15583	16121	14804					B	24	0.314238	0.348743	0.265731					B	24	0	0	0		0	0	0
C	1	Sample X49	43975	46291	47113					C	1	5.30031	6.6181	7.1997					C	1	4.91401	6.24559	6.96117		0.178895	0.255895	0
C	2	Sample X50	42806	46295	47351					C	2	4.76998	6.62076	7.3822					C	2	4.50161	6.40667	7.14763		0.18524	0.330753	0
C	3	Sample X51	48262	52228	53895					C	3	8.14917	13.5834	17.975					C	3	7.76287	13.2109	17.7365		1.13141	1.2467	1
C	4	Sample X52	42384	47448	50114					C	4	4.59582	7.45857	10.1441					C	4	4.32746	7.24449	9.90957		0.666272	0.697764	0
C	5	Sample X53	41433	51267	54534					C	5	4.23237	11.8135	20.3686					C	5	3.84607	11.441	20.1301		2.17228	2.03551	1
C	6	Sample X54	38226	50933	54806					C	6	3.24079	11.2863	21.5662					C	6	2.97243	11.0722	21.3317		2.56487	2.2949	1
C	7	Sample X55	43220	55160	57135					C	7	4.94934	23.3264	41.13					C	7	4.56304	22.9539	40.8915		4.48439	4.54106	1
C	8	Sample X56	32167	46285	51144					C	8	1.99107	6.61411	11.6147					C	8	1.72271	6.40002	11.3802		1.24503	1.20718	0
C	9	Sample X57	37815	51783	55705					C	9	3.13444	12.7124	26.6036					C	9	2.74813	12.3399	26.3651		3.50631	2.95212	1
C	10	Sample X58	28604	44090	49224					C	10	1.4814	5.35669	9.09985					C	10	1.21303	5.14261	8.86528		0.930668	0.956531	0
C	11	Sample X59	37357	50536	57174					C	11	3.02047	10.7079	41.7321					C	11	2.63417	10.3354	41.4936		7.78954	4.85743	1
C	12	Sample X60	30002	43895	48442					C	12	1.66694	5.26156	8.31502					C	12	1.39858	5.04748	8.08045		0.758243	0.835234	0
C	13	Sample X61	31607	45559	49122					C	13	1.90249	6.15591	8.99108					C	13	1.51619	5.7834	8.75256		0.742288	0.904546	0
C	14	Sample X62	24616	38739	42607					C	14	1.03267	3.37931	4.6868					C	14	0.764305	3.16522	4.45223		0.321751	0.46099	0
C	15	Sample X63	27632	41682	47317					C	15	1.36184	4.32389	7.35571					C	15	0.975536	3.95138	7.11719		0.791451	0.767706	0
C	16	Sample X64	26954	36990	43360					C	16	1.28261	2.93242	5.01202					C	16	1.01424	2.71833	4.77745		0.514779	0.470401	0
C	17	Sample X65	28053	38187	43128					C	17	1.41273	3.23053	4.90872					C	17	1.02643	2.85802	4.6702		0.453044	0.455471	0
C	18	Sample X66	24462	29675	41361					C	18	1.01736	1.62201	4.20637					C	18	0.748996	1.40792	3.9718		0.640968	0.40285	0
C	19	Sample X67	22376	30818	34758					C	19	0.822347	1.78346	2.45206					C	19	0.436045	1.41096	2.21354		0.200646	0.222187	0
C	20	Sample X68	17341	23865	28825					C	20	0.430214	0.95925	1.50962					C	20	0.161849	0.745163	1.27505		0.132472	0.13915	0
C	21	Sample X69	19141	25762	30930					C	21	0.559302	1.15091	1.79997					C	21	0.172999	0.778408	1.56144		0.195758	0.173555	0
C	22	Sample X70	21028	19936	23795					C	22	0.707431	0.620008	0.952562					C	22	0.439066	0.405921	0.71799		0.0780174	0.0348656	0
C	23	Sample X71	16692	16484	14355					C	23	0.386303	0.372507	0.238526					C	23	0	0	0		0	0	0
C	24	Sample X72	14847	13944	14289					C	24	0.268365	0.214087	0.234572					C	24	0	0	0		0	0	0
D	1	Sample X73	38074	42432	43457					D	1	3.20099	4.61521	5.05607					D	1	2.92974	4.36663	4.82544		0.114702	0.236962	0
D	2	Sample X74	113218	87939	81084					D	2	-4.84883	-6.97403	-8.42867					D	2	-5.10712	-7.16388	-8.63946		-0.368894	-0.441543	1
D	3	Sample X75	39749	45179	48151					D	3	3.67253	5.93398	8.04941					D	3	3.40128	5.6854	7.81878		0.533347	0.552187	0
D	4	Sample X76	35865	44702	48490					D	4	2.6792	5.671	8.36012					D	4	2.42091	5.48115	8.14933		0.667044	0.716052	0
D	5	Sample X77	29666	36813	39415					D	5	1.62079	2.89095	3.57238					D	5	1.34954	2.64237	3.34175		0.174846	0.249027	0
D	6	Sample X78	33857	46122	49773					D	6	2.28139	6.50706	9.72255					D	6	2.02311	6.31721	9.51176		0.798636	0.936081	0
D	7	Sample X79	22441	27768	31449					D	7	0.828097	1.37813	1.87813					D	7	0.556847	1.12955	1.6475		0.129487	0.136332	0
D	8	Sample X80	30809	45579	50840					D	8	1.78214	6.16791	11.1463					D	8	1.52386	5.97807	10.9355		1.23936	1.17646	0
D	9	Sample X81	19665	23987	26566					D	9	0.599045	0.970969	1.23871					D	9	0.327796	0.722387	1.00808		0.0714233	0.0850356	0
D	10	Sample X82	28104	43447	49836					D	10	1.41899	5.0515	9.79831					D	10	1.1607	4.86165	9.58752		1.18147	1.05335	0
D	11	Sample X83	17646	20315	21650					D	11	0.451315	0.649805	0.759452					D	11	0.180065	0.401223	0.528823		0.0319001	0.0435948	0
D	12	Sample X84	27113	42312	45700					D	12	1.30089	4.56694	6.24126					D	12	1.04261	4.37709	6.03047		0.413345	0.623482	0
D	13	Sample X85	16604	18898	18967					D	13	0.38045	0.541215	0.546329					D	13	0.1092	0.292633	0.3157		0.00576671	0.0258125	0
D	14	Sample X86	27304	39239	43707					D	14	1.3231	3.5209	5.17201					D	14	1.06481	3.33105	4.96122		0.40754	0.48705	0
D	15	Sample X87	16831	17488	15761					D	15	0.395596	0.440346	0.325561					D	15	0.124346	0.191765	0.0949322		-0.0242081	-0.00367677	0
D	16	Sample X88	20956	34414	41144					D	16	0.701516	2.38548	4.12919					D	16	0.44323	2.19563	3.9184		0.430691	0.434396	0
D	17	Sample X89	17141	18363	15692					D	17	0.41654	0.502138	0.321161					D	17	0.14529	0.253556	0.090532		-0.0407559	-0.00684479	0
D	18	Sample X90	18599	29901	39873					D	18	0.519251	1.65296	3.71056					D	18	0.260965	1.46311	3.49977		0.509165	0.404851	0
D	19	Sample X91	15286	16649	14487					D	19	0.295545	0.38344	0.246468					D	19	0.0242951	0.134858	0.0158391		-0.0297547	-0.00105699	0
D	20	Sample X92	20628	26572	30514					D	20	0.674845	1.23938	1.7393					D	20	0.416559	1.04953	1.52851		0.119745	0.138994	0
D	21	Sample X93	14585	14546	14454					D	21	0.252395	0.250033	0.244478					D	21	-0.0188554	0.00145127	0.0138492		0.00309948	0.00408807	0
D	22	Sample X94	18785	20182	24559					D	22	0.532876	0.639284	1.02699					D	22	0.27459	0.449434	0.816197		0.0916908	0.0677009	0
D	23	Sample X95	14894	14522	14223					D	23	0.27125	0.248582	0.230629					D	23	0	0	0		0	0	0
D	24	Sample X96	14682	13529	13888					D	24	0.258286	0.18985	0.210791					D	24	0	0	0		0	0	0
E	1	Sample X97	35798	39495	39480					E	1	2.66486	3.59607	3.59162					E	1	2.38424	3.34876	3.34961		0.000211787	0.120671	0
E	2	Sample X98	41865	46099	47609					E	2	4.39275	6.49216	7.58797					E	2	4.08395	6.26677	7.31543		0.262164	0.403935	0
E	3	Sample X99	36844	41568	43099					E	3	2.89817	4.28168	4.89601					E	3	2.61755	4.03437	4.654		0.154908	0.254557	0
E	4	Sample X100	40970	47280	51567					E	4	4.06858	7.32704	12.3227					E	4	3.75978	7.10165	12.0502		1.23713	1.0363	0
E	5	Sample X101	40759	48130	51831					E	5	3.99654	8.03075	12.8018					E	5	3.71592	7.78344	12.5597		1.19408	1.10548	0
E	6	Sample X102	37290	49143	53143					E	6	3.00418	9.01331	15.7295					E	6	2.69538	8.78792	15.457		1.66727	1.5952	1
E	7	Sample X103	39616	52345	56620					E	7	3.63226	13.8292	34.4822					E	7	3.35164	13.5819	34.2402		5.16459	3.86107	1
E	8	Sample X104	32065	45713	50325					E	8	1.97467	6.24921	10.4199					E	8	1.66587	6.02382	10.1474		1.03088	1.06019	0
E	9	Sample X105	37682	50356	55526					E	9	3.10086	10.4614	25.4392					E	9	2.82024	10.2141	25.1972		3.74577	2.79712	1
E	10	Sample X106	26277	39305	44535					E	10	1.20667	3.54011	5.58277					E	10	0.89787	3.31472	5.31023		0.498878	0.551545	0
E	11	Sample X107	38239	51604	56453					E	11	3.24422	12.388	32.741					E	11	2.9636	12.1407	32.499		5.08958	3.69193	1
E	12	Sample X108	22172	31268	36079					E	12	0.804431	1.85055	2.72553					E	12	0.495631	1.62516	2.45299		0.206958	0.24467	0
E	13	Sample X109	32673	44763	48324					E	13	2.07423	5.70371	8.20572					E	13	1.79361	5.4564	7.96371		0.626827	0.771263	0
E	14	Sample X110	16683	23321	28381					E	14	0.385703	0.907945	1.45332					E	14	0.0769037	0.682555	1.18078		0.124556	0.137984	0
E	15	Sample X111	26688	39182	45903					E	15	1.2524	3.50442	6.36713					E	15	0.971781	3.25711	6.12513		0.717005	0.644168	0
E	16	Sample X112	19272	19397	24766					E	16	0.569142	0.57859	1.04771					E	16	0.260342	0.353201	0.775169		0.105492	0.0643533	0
E	17	Sample X113	25592	37206	41858					E	17	1.13288	2.9839	4.39009					E	17	0.852256	2.73659	4.14808		0.352873	0.411978	0
E	18	Sample X114	16104	15906	17809					E	18	0.34764	0.334853	0.462717					E	18	0.0388405	0.109463	0.190176		0.0201783	0.018917	0
E	19	Sample X115	21982	27134	33155					E	19	0.787916	1.30332	2.15636					E	19	0.507296	1.05601	1.91435		0.214585	0.175882	0
E	20	Sample X116	14536	15335	16163					E	20	0.249428	0.298612	0.351473					E	20	-0.0593713	0.0732222	0.0789317		0.0014274	0.0172879	0
E	21	Sample X117	16975	21070	24073					E	21	0.405288	0.710891	0.979277					E	21	0.124667	0.463578	0.737268		0.0684224	0.076575	0
E	22	Sample X118	14779	14340	14170					E	22	0.264202	0.237626	0.227471					E	22	-0.0445969	0.0122362	-0.0450697		-0.0143265	-5.90916e-05	0
E	23	Sample X119	15046	14501	14413					E	23	0.28062	0.247313	0.24201					E	23	0	0	0		0	0	0
E	24	Sample X120	15497	14135	14915					E	24	0.308799	0.22539	0.272541					E	24	0	0	0		0	0	0
F	1	Sample X121	37083	38261	37781					F	1	2.95447	3.25003	3.12582					F	1	2.76572	3.09018	2.99141		-0.0246922	0.0282116	0
F	2	Sample X122	38869	42384	43431					F	2	3.41548	4.59582	5.04421					F	2	3.18729	4.41836	4.90044		0.12052	0.214143	0
F	3	Sample X123	36344	38007	39176					F	3	2.78407	3.18363	3.50269					F	3	2.59532	3.02377	3.36828		0.0861281	0.09662	0
F	4	Sample X124	40162	46578	48430					F	4	3.80104	6.81307	8.3038					F	4	3.57285	6.63561	8.16003		0.381107	0.573398	0
F	5	Sample X125	32485	36435	38759					F	5	2.04298	2.80448	3.38485					F	5	1.85423	2.64462	3.25044		0.151455	0.174526	0
F	6	Sample X126	39783	47451	51460					F	6	3.68292	7.46095	12.137					F	6	3.45473	7.28349	11.9932		1.17744	1.06731	0
F	7	Sample X127	28943	31217	33433					F	7	1.52486	1.84284	2.20509					F	7	1.33611	1.68298	2.07068		0.0969235	0.0918213	0
F	8	Sample X128	30985	42783	48635					F	8	1.80812	4.76027	8.49868					F	8	1.57993	4.5828	8.35491		0.943027	0.846873	0
F	9	Sample X129	20398	24044	24784					F	9	0.656406	0.976471	1.04952					F	9	0.467656	0.816614	0.915115		0.0246254	0.0559324	0
F	10	Sample X130	24361	34544	41803					F	10	1.00739	2.41043	4.36926					F	10	0.779208	2.23297	4.2255		0.498131	0.430786	0
F	11	Sample X131	20691	19817	22213					F	11	0.679933	0.610768	0.808016					F	11	0.491183	0.450911	0.673609		0.0556744	0.0228032	0
F	12	Sample X132	20412	26564	34517					F	12	0.657522	1.23849	2.40523					F	12	0.429337	1.06102	2.26146		0.30011	0.229016	0
F	13	Sample X133	16680	17829	17871					F	13	0.385503	0.464122	0.467077					F	13	0.196753	0.304265	0.33267		0.00710125	0.0169896	0
F	14	Sample X134	18042	21219	29656					F	14	0.47917	0.723228	1.61943					F	14	0.250984	0.545766	1.47566		0.232474	0.153085	0
F	15	Sample X135	14679	14389	15489					F	15	0.258103	0.240567	0.308295					F	15	0.069353	0.0807095	0.173887		0.0232944	0.0130668	0
F	16	Sample X136	14289	17050	19784					F	16	0.234572	0.410361	0.608216					F	16	0.00638612	0.232899	0.464448		0.0578872	0.0572577	0
F	17	Sample X137	12877	12916	12899					F	17	0.152632	0.15483	0.153871					F	17	-0.0361178	-0.00502777	0.019464		0.00612294	0.00694772	0
F	18	Sample X138	13298	14908	17439					F	18	0.176545	0.27211	0.436961					F	18	-0.0516405	0.0946482	0.293193		0.0496362	0.0431042	0
F	19	Sample X139	12297	15015	12296					F	19	0.12038	0.278704	0.120325					F	19	-0.06837	0.118847	-0.0140821		-0.0332322	0.00678598	0
F	20	Sample X140	12850	13028	13927					F	20	0.151113	0.16116	0.213086					F	20	-0.077072	-0.0163024	0.0693176		0.021405	0.0182987	0
F	21	Sample X141	13046	12977	13519					F	21	0.16218	0.158274	0.189271					F	21	-0.0265703	-0.00158382	0.0548634		0.0141118	0.0101792	0
F	22	Sample X142	13009	12358	13027					F	22	0.160084	0.123735	0.161103					F	22	-0.0681016	-0.0537268	0.0173351		0.0177655	0.0106796	0
F	23	Sample X143	13510	13005	12551					F	23	0.18875	0.159857	0.134407					F	23	0	0	0		0	0	0
F	24	Sample X144	14182	13314	12719					F	24	0.228185	0.177462	0.143768					F	24	0	0	0		0	0	0
G	1	Sample X145	33391	37714	38009					G	1	2.19766	3.1089	3.18414					G	1	2.14669	3.09401	3.13614		0.0105312	0.123681	0
G	2	Sample X146	32405	37410	37709					G	2	2.02981	3.03342	3.10764					G	2	1.99595	3.05626	3.11929		0.0157571	0.140417	0
G	3	Sample X147	37720	42783	43154					G	3	3.11041	4.76027	4.92016					G	3	3.05944	4.74538	4.87215		0.0316942	0.226589	0
G	4	Sample X148	37048	42934	42921					G	4	2.94615	4.8245	4.81893					G	4	2.9123	4.84734	4.83058		-0.00419228	0.239785	0
G	5	Sample X149	37995	44245	44787					G	5	3.18053	5.43399	5.71666					G	5	3.12956	5.4191	5.66865		0.0623878	0.317387	0
G	6	Sample X150	36913	44577	43633					G	6	2.9143	5.60478	5.13732					G	6	2.88045	5.62762	5.14896		-0.119663	0.283564	0
G	7	Sample X151	37543	44480	45715					G	7	3.06619	5.55412	6.25044					G	7	3.01522	5.53924	6.20243		0.165799	0.398401	0
G	8	Sample X152	33745	43542	43975					G	8	2.261	5.09509	5.30031					G	8	2.22715	5.11793	5.31196		0.0485069	0.385601	0
G	9	Sample X153	35294	44046	45063					G	9	2.5595	5.33503	5.86848					G	9	2.50853	5.32014	5.82048		0.125085	0.413993	0
G	10	Sample X154	27178	37799	41076					G	10	1.30842	3.13038	4.10537					G	10	1.27457	3.15322	4.11701		0.240949	0.355306	0
G	11	Sample X155	34876	43093	45966					G	11	2.47532	4.89339	6.40694					G	11	2.42435	4.8785	6.35894		0.370109	0.491823	0
G	12	Sample X156	21888	32526	36394					G	12	0.779807	2.04976	2.79526					G	12	0.745955	2.0726	2.80691		0.183578	0.257619	0
G	13	Sample X157	31820	40680	41642					G	13	1.93577	3.96998	4.30902					G	13	1.8848	3.95509	4.26102		0.0764813	0.297027	0
G	14	Sample X158	17689	25472	31405					G	14	0.454314	1.12025	1.87139					G	14	0.420462	1.14309	1.88304		0.184987	0.182822	0
G	15	Sample X159	28077	35297	38068					G	15	1.41567	2.56011	3.19943					G	15	1.3647	2.54523	3.15143		0.151551	0.223341	0
G	16	Sample X160	14286	18915	23202					G	16	0.234392	0.542473	0.896924					G	16	0.20054	0.565312	0.908569		0.0858142	0.0885037	0
G	17	Sample X161	22445	30861	35048					G	17	0.828452	1.78978	2.50962					G	17	0.777483	1.7749	2.46161		0.17168	0.210516	0
G	18	Sample X162	11002	15969	19573					G	18	0.0511245	0.338909	0.591993					G	18	0.0172723	0.361748	0.603638		0.0604725	0.0732958	0
G	19	Sample X163	18370	22434	26682					G	19	0.502642	0.827477	1.25173					G	19	0.451674	0.812589	1.20372		0.0977831	0.0940059	0
G	20	Sample X164	10471	12567	15236					G	20	0.023774	0.135296	0.292422					G	20	-0.0100783	0.158136	0.304068		0.0364831	0.0392683	0
G	21	Sample X165	14321	18334	21038					G	21	0.236487	0.500048	0.708254					G	21	0.185519	0.48516	0.66025		0.0437725	0.0593414	0
G	22	Sample X166	10533	10799	12606					G	22	0.0269372	0.0405988	0.137465					G	22	-0.00691512	0.0634382	0.14911		0.021418	0.0195032	0
G	23	Sample X167	10999	10296	10942					G	23	0.0509683	0.0148881	0.0480044					G	23	0	0	0		0	0	0
G	24	Sample X168	10668	9539	9766					G	24	0.0338523	-0.0228394	-0.0116455					G	24	0	0	0		0	0	0
H	1	Sample X169	27164	37197	42712					H	1	1.3068	2.98173	4.73045					H	1	0.773332	2.32955	4.22174		0.473047	0.43105	0
H	2	Sample X170	20525	29052	34695					H	2	0.666561	1.53903	2.43974					H	2	0.0581909	1.07315	1.80517		0.183006	0.218373	0
H	3	Sample X171	31429	45485	50715					H	3	1.87507	6.11178	10.9626					H	3	1.3416	5.45959	10.4539		1.24857	1.13903	0
H	4	Sample X172	24744	31886	38032					H	4	1.0455	1.94618	3.19009					H	4	0.437126	1.4803	2.55553		0.268808	0.264801	0
H	5	Sample X173	33624	44940	52867					H	5	2.23916	5.80013	15.0242					H	5	1.70569	5.14795	14.5155		2.34188	1.60122	1
H	6	Sample X174	23404	30496	36651					H	6	0.915674	1.73671	2.85355					H	6	0.307304	1.27083	2.21899		0.237039	0.238961	0
H	7	Sample X175	32973	45206	51727					H	7	2.125	5.94937	12.6094					H	7	1.59154	5.29718	12.1007		1.70087	1.31364	0
H	8	Sample X176	21137	24828	27977					H	8	0.716427	1.05396	1.40344					H	8	0.108057	0.588083	0.768884		0.0452003	0.0826034	0
H	9	Sample X177	35828	49023	56173					H	9	2.67127	8.88745	30.1627					H	9	2.13781	8.23526	29.6539		5.35467	3.43952	1
H	10	Sample X178	19491	22240	24212					H	10	0.585734	0.810381	0.992791					H	10	-0.0226362	0.344501	0.35823		0.00343241	0.0476083	0
H	11	Sample X179	32169	43352	52338					H	11	1.99139	5.00841	13.8143					H	11	1.45793	4.35622	13.3056		2.23734	1.48095	1
H	12	Sample X180	19797	19789	20399					H	12	0.609221	0.608602	0.656486					H	12	0.000850486	0.142722	0.0219255		-0.030199	0.00263438	0
H	13	Sample X181	29343	40532	45139					H	13	1.57737	3.92079	5.91128					H	13	1.04391	3.26861	5.40256		0.53349	0.544832	0
H	14	Sample X182	19305	16946	17659					H	14	0.57163	0.403331	0.452221					H	14	-0.0367398	-0.0625498	-0.182339		-0.0299473	-0.0181999	0
H	15	Sample X183	23863	36397	44786					H	15	0.959059	2.79594	5.71612					H	15	0.425593	2.14375	5.2074		0.765914	0.597726	0
H	16	Sample X184	17009	17279	17657					H	16	0.407585	0.425961	0.452082					H	16	-0.200785	-0.039919	-0.182479		-0.0356399	0.00228829	0
H	17	Sample X185	26162	33924	40467					H	17	1.19407	2.29368	3.89943					H	17	0.660607	1.64149	3.39071		0.437305	0.341263	0
H	18	Sample X186	17609	15511	16503					H	18	0.448739	0.309683	0.373761					H	18	-0.159631	-0.156197	-0.260799		-0.0261504	-0.012646	0
H	19	Sample X187	23832	33191	38166					H	19	0.956094	2.16261	3.22502					H	19	0.422629	1.51043	2.7163		0.301469	0.286709	0
H	20	Sample X188	17431	17795	19596					H	20	0.436409	0.461734	0.593753					H	20	-0.171961	-0.00414612	-0.0408073		-0.0091653	0.0163942	0
H	21	Sample X189	19236	26783	26735					H	21	0.566431	1.26313	1.2577					H	21	0.032966	0.610946	0.74899		0.0345111	0.089503	0
H	22	Sample X190	19149	18988	18039					H	22	0.559901	0.547888	0.478957					H	22	-0.0484696	0.0820079	-0.155604		-0.0594029	-0.0133918	0
H	23	Sample X191	18793	20345	18454					H	23	0.533465	0.652188	0.508713					H	23	0	0	0		0	0	0
H	24	Sample X192	19786	17854	20122					H	24	0.60837	0.465881	0.63456					H	24	0	0	0		0	0	0
I	1	Sample X193	25650	30907	35082					I	1	1.13901	1.79657	2.51645					I	1	0.968355	1.64405	2.32231		0.169567	0.169245	0
I	2	Sample X194	23250	33055	37821					I	2	0.901361	2.13908	3.13596					I	2	0.569077	1.93029	2.86986		0.234894	0.287598	0
I	3	Sample X195	24667	35252	40582					I	3	1.03777	2.55091	3.93733					I	3	0.867114	2.39839	3.74319		0.336198	0.359509	0
I	4	Sample X196	22837	33475	39200					I	4	0.863561	2.21254	3.50962					I	4	0.531277	2.00374	3.24352		0.309944	0.33903	0
I	5	Sample X197	24773	34804	40321					I	5	1.04841	2.4611	3.85195					I	5	0.87776	2.30859	3.65781		0.337306	0.347506	0
I	6	Sample X198	19417	28614	34004					I	6	0.580107	1.48267	2.30843					I	6	0.247824	1.27387	2.04233		0.192115	0.224314	0
I	7	Sample X199	26576	35824	42378					I	7	1.23983	2.67042	4.59341					I	7	1.06917	2.5179	4.39927		0.470342	0.416262	0
I	8	Sample X200	18833	25806	30108					I	8	0.536413	1.15561	1.68172					I	8	0.204129	0.946818	1.41562		0.117201	0.151437	0
I	9	Sample X201	27188	36585	43863					I	9	1.30958	2.83846	5.24617					I	9	1.13893	2.68594	5.05203		0.591524	0.489138	0
I	10	Sample X202	15865	21607	23468					I	10	0.332219	0.755802	0.921658					I	10	-6.41732e-05	0.547008	0.655559		0.0271378	0.0819529	0
I	11	Sample X203	26885	34324	41552					I	11	1.27472	2.36836	4.2758					I	11	1.10407	2.21584	4.08166		0.466456	0.372199	0
I	12	Sample X204	18123	19430	20008					I	12	0.484932	0.581094	0.625625					I	12	0.152649	0.372301	0.359526		-0.00319354	0.0258597	0
I	13	Sample X205	24787	32334	39714					I	13	1.04983	2.01818	3.66189					I	13	0.879171	1.86566	3.46775		0.400521	0.323572	0
I	14	Sample X206	15060	13966	15147					I	14	0.281486	0.215384	0.286882					I	14	-0.0507971	0.00659045	0.0207829		0.00354811	0.0089475	0
I	15	Sample X207	19571	28027	35108					I	15	0.59184	1.40955	2.52169					I	15	0.421185	1.25703	2.32755		0.267631	0.238296	0
I	16	Sample X208	12532	14996	15674					I	16	0.133353	0.277531	0.320015					I	16	-0.198931	0.0687371	0.0539166		-0.0037051	0.0316059	0
I	17	Sample X209	18546	27412	32732					I	17	0.515391	1.33577	2.08413					I	17	0.344736	1.18325	1.88999		0.176685	0.193157	0
I	18	Sample X210	15449	13189	13821					I	18	0.305773	0.170313	0.206858					I	18	-0.0265103	-0.0384813	-0.0592406		-0.00518983	-0.00409128	0
I	19	Sample X211	16823	20538	25296					I	19	0.39506	0.667604	1.10189					I	19	0.224405	0.515084	0.907751		0.0981665	0.0854182	0
I	20	Sample X212	14576	14730	14410					I	20	0.251849	0.261211	0.241829					I	20	-0.0804343	0.0524167	-0.0242693		-0.0191715	0.00702061	0
I	21	Sample X213	15946	18200	23476					I	21	0.337427	0.490431	0.922407					I	21	0.166772	0.337911	0.728267		0.0975892	0.0701869	0
I	22	Sample X214	13073	12495	17694					I	22	0.163712	0.131302	0.454664					I	22	-0.168572	-0.0774919	0.188565		0.0665142	0.0446421	0
I	23	Sample X215	13195	12875	13603					I	23	0.170655	0.15252	0.19414					I	23	0	0	0		0	0	0
I	24	Sample X216	15866	13854	14810					I	24	0.332284	0.208794	0.266099					I	24	0	0	0		0	0	0
J	1	Sample X217	25568	30734	37053					J	1	1.13034	1.77117	2.94734					J	1	0.911297	1.55011	2.40826		0.214539	0.187121	0
J	2	Sample X218	19377	26965	31733					J	2	0.577075	1.28387	1.92212					J	2	0.325044	1.02107	1.5772		0.139033	0.15652	0
J	3	Sample X219	25819	35221	41116					J	3	1.157	2.54459	4.11936					J	3	0.937956	2.32354	3.58029		0.314189	0.330292	0
J	4	Sample X220	20419	27464	30348					J	4	0.658081	1.3419	1.71557					J	4	0.40605	1.0791	1.37065		0.0728871	0.120575	0
J	5	Sample X221	25570	34809	40920					J	5	1.13055	2.46209	4.05136					J	5	0.911508	2.24103	3.51229		0.317815	0.325098	0
J	6	Sample X222	16900	21723	25084					J	6	0.400232	0.765669	1.08002					J	6	0.148201	0.502871	0.735103		0.0580578	0.0733627	0
J	7	Sample X223	28479	37976	44102					J	7	1.46561	3.17563	5.36262					J	7	1.24656	2.95457	4.82355		0.467247	0.447124	0
J	8	Sample X224	15689	18885	21481					J	8	0.32097	0.540253	0.745152					J	8	0.068939	0.277456	0.400234		0.0306946	0.0414119	0
J	9	Sample X225	24518	35125	40912					J	9	1.02291	2.52513	4.04862					J	9	0.803867	2.30407	3.50955		0.30137	0.33821	0
J	10	Sample X226	14773	15924	18037					J	10	0.263836	0.336011	0.478815					J	10	0.0118048	0.0732133	0.133897		0.0151709	0.0152615	0
J	11	Sample X227	24965	32452	39623					J	11	1.06786	2.03753	3.63437					J	11	0.848814	1.81648	3.0953		0.319705	0.28081	0
J	12	Sample X228	13802	15233	14651					J	12	0.205745	0.292235	0.2564					J	12	-0.0462862	0.0294381	-0.0885175		-0.0294889	-0.00527891	0
J	13	Sample X229	22226	32529	38559					J	13	0.809154	2.05025	3.32995					J	13	0.590108	1.82919	2.79088		0.240422	0.275097	0
J	14	Sample X230	15745	13426	13933					J	14	0.32454	0.183901	0.213439					J	14	0.0725086	-0.0788964	-0.131479		-0.0131456	-0.0254984	0
J	15	Sample X231	19557	26147	32479					J	15	0.59077	1.19243	2.04199					J	15	0.371723	0.971376	1.50292		0.132885	0.141399	0
J	16	Sample X232	15840	14283	14541					J	16	0.330616	0.234213	0.249731					J	16	0.0785849	-0.0285846	-0.0951873		-0.0166507	-0.0217215	0
J	17	Sample X233	20277	24348	29469					J	17	0.646792	1.00611	1.5942					J	17	0.427745	0.785056	1.05513		0.0675183	0.078423	0
J	18	Sample X234	16803	13374	13881					J	18	0.393719	0.180908	0.21038					J	18	0.141688	-0.0818896	-0.134538		-0.0131621	-0.0345283	0
J	19	Sample X235	20746	22699	24617					J	19	0.684389	0.851117	1.03277					J	19	0.465342	0.630058	0.4937		-0.0340895	0.00354465	0
J	20	Sample X236	14110	12260	15926					J	20	0.223905	0.118349	0.336139					J	20	-0.028126	-0.144448	-0.00877862		0.0339173	0.00241842	0
J	21	Sample X237	16931	20159	21516					J	21	0.40232	0.637471	0.748103					J	21	0.183273	0.416413	0.209033		-0.051845	0.00321996	0
J	22	Sample X238	13200	15806	17291					J	22	0.17094	0.328438	0.426784					J	22	-0.0810908	0.065641	0.0818657		0.00405619	0.0203696	0
J	23	Sample X239	14028	14062	18869					J	23	0.219046	0.221059	0.53907					J	23	0	0	0		0	0	0
J	24	Sample X240	14579	14756	16062					J	24	0.252031	0.262797	0.344918					J	24	0	0	0		0	0	0
K	1	Sample X241	28130	35139	38515					K	1	1.42218	2.52796	3.31801					K	1	1.21133	2.37515	3.09612		0.180243	0.235599	0
K	2	Sample X242	45759	52294	52135					K	2	6.27747	13.7211	13.3932					K	2	5.99518	13.3458	13.2115		-0.0335756	0.902045	1
K	3	Sample X243	29528	38469	41904					K	3	1.60213	3.30558	4.4076					K	3	1.39128	3.15278	4.18572		0.258234	0.349305	0
K	4	Sample X244	47358	54835	54806					K	4	7.38768	21.7014	21.5662					K	4	7.10538	21.3261	21.3846		0.0146254	1.7849	1
K	5	Sample X245	31160	40418	44735					K	5	1.83426	3.88341	5.68867					K	5	1.62341	3.73061	5.46678		0.434042	0.480421	0
K	6	Sample X246	43489	53025	53025					K	6	5.07071	15.4211	15.4211					K	6	4.78842	15.0459	15.2395		0.0484066	1.30638	1
K	7	Sample X247	33028	38090	41094					K	7	2.13444	3.20516	4.11166					K	7	1.92359	3.05236	3.88977		0.209353	0.245773	0
K	8	Sample X248	39426	52133	53086					K	8	3.57563	13.3892	15.5793					K	8	3.29334	13.0139	15.3976		0.595932	1.51303	1
K	9	Sample X249	30743	38387	41913					K	9	1.77248	3.28356	4.41104					K	9	1.56163	3.13075	4.18915		0.264599	0.32844	0
K	10	Sample X250	31750	44040	48787					K	10	1.92478	5.33208	8.64777					K	10	1.64249	4.9568	8.46612		0.87733	0.852954	0
K	11	Sample X251	29484	37311	40296					K	11	1.59621	3.00928	3.84389					K	11	1.38536	2.85648	3.622		0.191381	0.27958	0
K	12	Sample X252	23249	30889	37250					K	12	0.901268	1.79391	2.99451					K	12	0.618977	1.41863	2.81285		0.348556	0.274234	0
K	13	Sample X253	28859	37234	40893					K	13	1.514	2.99064	4.0421					K	13	1.30315	2.83784	3.82022		0.245594	0.314633	0
K	14	Sample X254	17278	25309	32169					K	14	0.425893	1.10324	1.99139					K	14	0.143602	0.727958	1.80974		0.270445	0.208267	0
K	15	Sample X255	24612	32284	39583					K	15	1.03227	2.01003	3.62235					K	15	0.821421	1.85723	3.40046		0.385808	0.32238	0
K	16	Sample X256	15840	19593	27965					K	16	0.330616	0.593523	1.40198					K	16	0.0483247	0.218242	1.22033		0.250521	0.1465	0
K	17	Sample X257	20660	27135	30901					K	17	0.677428	1.30344	1.79568					K	17	0.466578	1.15064	1.57379		0.105789	0.138402	0
K	18	Sample X258	13973	14567	18900					K	18	0.215797	0.251304	0.541363					K	18	-0.066494	-0.123978	0.359707		0.120921	0.0532752	0
K	19	Sample X259	23825	25626	27680					K	19	0.955425	1.13647	1.36757					K	19	0.744575	0.983668	1.14569		0.0405045	0.0501389	0
K	20	Sample X260	12918	13905	15311					K	20	0.154942	0.211791	0.297109					K	20	-0.127349	-0.163491	0.115454		0.0697361	0.0303503	0
K	21	Sample X261	18665	18171	20214					K	21	0.524072	0.488357	0.641809					K	21	0.313222	0.335556	0.41992		0.0210911	0.0133373	0
K	22	Sample X262	13180	16072	15051					K	22	0.169799	0.345565	0.280929					K	22	-0.112492	-0.0297163	0.0992742		0.0322476	0.0264708	0
K	23	Sample X263	13889	12880	14076					K	23	0.21085	0.152801	0.221888					K	23	0	0	0		0	0	0
K	24	Sample X264	15073	16526	13387					K	24	0.282291	0.375282	0.181655					K	24	0	0	0		0	0	0
L	1	Sample X265	49035	50015	48665					L	1	8.89991	10.0188	8.52779					L	1	8.69738	9.82063	8.34435		-0.369069	-0.0441289	0
L	2	Sample X266	49657	52001	51649					L	2	9.58547	13.127	12.4683					L	2	9.46063	12.9693	12.3447		-0.156151	0.360508	0
L	3	Sample X267	49078	51864	52021					L	3	8.94479	12.8638	13.1661					L	3	8.74226	12.6657	12.9827		0.0792552	0.530053	1
L	4	Sample X268	52931	56675	56125					L	4	15.1828	35.094	29.7581					L	4	15.058	34.9363	29.6345		-1.32546	1.82206	1
L	5	Sample X269	53400	54414	55656					L	5	16.4394	19.8774	26.2753					L	5	16.2369	19.6792	26.0919		1.60317	1.23188	1
L	6	Sample X270	49095	54720	56810					L	6	8.96263	21.1742	36.685					L	6	8.83779	21.0166	36.5614		3.8862	3.46545	1
L	7	Sample X271	53337	52386	59066					L	7	16.2603	13.9171	131.333					L	7	16.0578	13.719	131.15		29.3576	14.3865	1
L	8	Sample X272	42493	52483	53284					L	8	4.64	14.129	16.1123					L	8	4.51516	13.9713	15.9887		0.504344	1.43419	1
L	9	Sample X273	45657	54785	57530					L	9	6.21505	21.4693	48.1073					L	9	6.01253	21.2712	47.9238		6.66317	5.23892	1
L	10	Sample X274	33296	45464	49802					L	10	2.18095	6.09934	9.75731					L	10	2.05611	5.94169	9.63374		0.923012	0.947203	0
L	11	Sample X275	45840	55218	58145					L	11	6.32768	23.6397	64.8854					L	11	6.12516	23.4415	64.702		10.3151	7.32211	1
L	12	Sample X276	24011	35218	44701					L	12	0.973284	2.54398	5.67047					L	12	0.848446	2.38633	5.5469		0.790142	0.587307	0
L	13	Sample X277	40397	50278	55237					L	13	3.87658	10.3574	23.744					L	13	3.67405	10.1593	23.5605		3.35031	2.48581	1
L	14	Sample X278	18168	26715	34367					L	14	0.488143	1.25545	2.37653					L	14	0.363306	1.09779	2.25296		0.288791	0.236206	0
L	15	Sample X279	36972	48377	51436					L	15	2.92817	8.25454	12.096					L	15	2.72565	8.05639	11.9125		0.964039	1.14836	0
L	16	Sample X280	15587	21910	26813					L	16	0.314491	0.781701	1.26654					L	16	0.189654	0.624049	1.14296		0.129729	0.119164	0
L	17	Sample X281	28866	38952	43661					L	17	1.5149	3.43881	5.15041					L	17	1.31238	3.24065	4.96697		0.431578	0.456824	0
L	18	Sample X282	14593	16893	22155					L	18	0.25288	0.399761	0.802946					L	18	0.128042	0.242109	0.679376		0.109317	0.0689167	0
L	19	Sample X283	22434	34798	37637					L	19	0.827477	2.45992	3.08959					L	19	0.62495	2.26177	2.90615		0.161095	0.28515	0
L	20	Sample X284	13904	15789	17590					L	20	0.211732	0.327351	0.447418					L	20	0.0868948	0.169699	0.323848		0.0385373	0.0296191	0
L	21	Sample X285	21578	27160	32866					L	21	0.753344	1.30633	2.10677					L	21	0.550817	1.10818	1.92333		0.203786	0.171564	0
L	22	Sample X286	12911	14668	15583					L	22	0.154548	0.257434	0.314238					L	22	0.0297105	0.0997821	0.190668		0.0227214	0.0201196	0
L	23	Sample X287	13747	13672	13418					L	23	0.202527	0.198152	0.18344					L	23	0	0	0		0	0	0
L	24	Sample X288	12378	12966	12355					L	24	0.124837	0.157652	0.12357					L	24	0	0	0		0	0	0
M	1	Sample X289	38815	44372	45697					M	1	3.4004	5.49846	6.23943					M	1	3.27468	5.40408	6.1219		0.179454	0.355902	0
M	2	Sample X290	46008	49669	48868					M	2	6.43368	9.59951	8.72889					M	2	6.26536	9.426	8.58159		-0.2111	0.289529	0
M	3	Sample X291	36707	43552	45225					M	3	2.86642	5.09971	5.96024					M	3	2.7407	5.00532	5.84271		0.209346	0.387751	0
M	4	Sample X292	49368	53426	53277					M	4	9.25696	16.5143	16.0929					M	4	9.08864	16.3408	15.9456		-0.0987983	0.857119	1
M	5	Sample X293	37594	44490	48005					M	5	3.07886	5.55932	7.92101					M	5	2.95314	5.46493	7.80348		0.584637	0.606292	0
M	6	Sample X294	44363	48817	51378					M	6	5.49386	8.67768	11.9978					M	6	5.32554	8.50417	11.8505		0.836583	0.81562	0
M	7	Sample X295	37618	45535	46376					M	7	3.08484	6.14155	6.67499					M	7	2.95913	6.04716	6.55746		0.127573	0.449792	0
M	8	Sample X296	42342	48090	54412					M	8	4.57894	7.99538	19.8694					M	8	4.41063	7.82187	19.7221		2.97505	1.91393	1
M	9	Sample X297	34780	42241	45257					M	9	2.45638	4.53868	5.9786					M	9	2.33066	4.4443	5.86107		0.354193	0.441301	0
M	10	Sample X298	33071	42570	50047					M	10	2.14184	4.67154	10.059					M	10	1.97352	4.49803	9.91173		1.35342	0.992277	0
M	11	Sample X299	34974	43878	48518					M	11	2.49481	5.25338	8.38661					M	11	2.36909	5.159	8.26908		0.77752	0.737499	0
M	12	Sample X300	25359	33032	43621					M	12	1.10844	2.13512	5.13172					M	12	0.940123	1.96161	4.98443		0.755704	0.505538	0
M	13	Sample X301	33319	44461	52484					M	13	2.18498	5.54428	14.1312					M	13	2.05926	5.44989	14.0137		2.14094	1.4943	1
M	14	Sample X302	16744	26366	35324					M	14	0.389773	1.21648	2.56565					M	14	0.221455	1.04297	2.41836		0.343847	0.274613	0
M	15	Sample X303	31249	38461	43008					M	15	1.84767	3.30343	4.8564					M	15	1.72196	3.20904	4.73888		0.382458	0.377115	0
M	16	Sample X304	13792	21512	26890					M	16	0.205159	0.747766	1.27529					M	16	0.0368418	0.574255	1.128		0.138436	0.136395	0
M	17	Sample X305	25737	33687	39396					M	17	1.14825	2.2505	3.56678					M	17	1.02253	2.15612	3.44926		0.323284	0.303341	0
M	18	Sample X306	15694	19235	21688					M	18	0.321288	0.566356	0.762685					M	18	0.152971	0.392845	0.61539		0.0556362	0.0578024	0
M	19	Sample X307	22916	28688	32321					M	19	0.870726	1.49208	2.01606					M	19	0.745006	1.3977	1.89853		0.125209	0.144191	0
M	20	Sample X308	12841	15122	15111					M	20	0.150608	0.285329	0.284647					M	20	-0.0177099	0.111818	0.137351		0.0063832	0.0193826	0
M	21	Sample X309	18725	23124	26641					M	21	0.528468	0.889739	1.24711					M	21	0.402748	0.795355	1.12959		0.0835582	0.090855	0
M	22	Sample X310	12224	12383	14082					M	22	0.116376	0.125113	0.222244					M	22	-0.051941	-0.048398	0.0749485		0.0308366	0.0158612	0
M	23	Sample X311	12394	11819	12245					M	23	0.125719	0.0943837	0.117527					M	23	0	0	0		0	0	0
M	24	Sample X312	13154	13245	12782					M	24	0.168317	0.173511	0.147296					M	24	0	0	0		0	0	0
N	1	Sample X313	39507	39962	37914					N	1	3.59964	3.73815	3.15969					N	1	3.56064	3.6751	3.11868		-0.139104	-0.0552453	0
N	2	Sample X314	43505	43864	42764					N	2	5.07805	5.24665	4.75226					N	2	4.9447	5.13072	4.73464		-0.0990189	-0.0262577	0
N	3	Sample X315	44031	47097	47739					N	3	5.32767	7.18767	7.69493					N	3	5.28867	7.12462	7.65392		0.132324	0.295656	0
N	4	Sample X316	44616	43948	43775					N	4	5.62533	5.28719	5.20416					N	4	5.49197	5.17125	5.18654		0.00382091	-0.0381794	0
N	5	Sample X317	42059	40420	45562					N	5	4.46728	3.88407	6.15771					N	5	4.42828	3.82101	6.1167		0.573921	0.211052	0
N	6	Sample X318	41752	45415	46013					N	6	4.35007	6.07045	6.43687					N	6	4.21671	5.95451	6.41925		0.116184	0.275317	0
N	7	Sample X319	41718	41870	44691					N	7	4.33733	4.39465	5.66513					N	7	4.29833	4.3316	5.62412		0.32313	0.165724	0
N	8	Sample X320	34894	42546	43321					N	8	2.47889	4.66168	4.99445					N	8	2.34554	4.54574	4.97683		0.107772	0.328912	0
N	9	Sample X321	39035	42805	43187					N	9	3.46232	4.76956	4.93472					N	9	3.42332	4.7065	4.89371		0.0468018	0.183799	0
N	10	Sample X322	29769	39439	41622					N	10	1.63483	3.57947	4.30161					N	10	1.50148	3.46353	4.28399		0.205114	0.347814	0
N	11	Sample X323	36451	42326	41901					N	11	2.80808	4.57254	4.40646					N	11	2.76908	4.50948	4.36545		-0.0360095	0.199546	0
N	12	Sample X324	21765	31696	36040					N	12	0.769256	1.91634	2.71703					N	12	0.635903	1.8004	2.69941		0.224752	0.257938	0
N	13	Sample X325	34107	38352	40989					N	13	2.32756	3.27421	4.07514					N	13	2.28856	3.21115	4.03413		0.205744	0.218196	0
N	14	Sample X326	16918	25196	29880					N	14	0.401444	1.09154	1.65007					N	14	0.268091	0.975603	1.63244		0.16421	0.170544	0
N	15	Sample X327	25523	34762	37670					N	15	1.12561	2.45285	3.09785					N	15	1.08661	2.3898	3.05684		0.16676	0.246279	0
N	16	Sample X328	14111	19852	23317					N	16	0.223964	0.61348	0.907573					N	16	0.0906114	0.497542	0.88995		0.098102	0.0999173	0
N	17	Sample X329	22224	30331	32902					N	17	0.808979	1.71315	2.11289					N	17	0.76998	1.6501	2.07187		0.105443	0.162737	0
N	18	Sample X330	11429	15100	17280					N	18	0.0735521	0.283964	0.42603					N	18	-0.0598009	0.168026	0.408407		0.0600952	0.0585259	0
N	19	Sample X331	14922	20316	22729					N	19	0.272971	0.649884	0.853814					N	19	0.233972	0.586833	0.812802		0.0564922	0.0723537	0
N	20	Sample X332	10292	12252	13319					N	20	0.0146858	0.117911	0.177749					N	20	-0.118667	0.00197231	0.160126		0.0395383	0.0348491	0
N	21	Sample X333	13372	18860	20873					N	21	0.180793	0.538405	0.694725					N	21	0.141794	0.475354	0.653713		0.0445896	0.0639899	0
N	22	Sample X334	10524	12873	12672					N	22	0.0264775	0.152407	0.141143					N	22	-0.106876	0.0364689	0.123519		0.0217626	0.0287994	0
N	23	Sample X335	10768	11230	10807					N	23	0.038999	0.0630511	0.0410119					N	23	0	0	0		0	0	0
N	24	Sample X336	12532	12216	10350					N	24	0.133353	0.115938	0.0176234					N	24	0	0	0		0	0	0
						#DIV/0!	#DIV/0!	24
						#DIV/0!	#DIV/0!	12
						#DIV/0!	#DIV/0!	6
						#DIV/0!	#DIV/0!	3
						#DIV/0!	#DIV/0!	1.5
						#DIV/0!	#DIV/0!	0.75
						#DIV/0!	#DIV/0!	0.375
						#DIV/0!	#DIV/0!	0.1875
						#DIV/0!	#DIV/0!	0.09375
						#DIV/0!	#DIV/0!	0.046875
						#DIV/0!	#DIV/0!	0.0234375
						#DIV/0!	#DIV/0!	0
[truncated: 11 more columns]
