# Supplementary material for: PDZ-directed substrate recruitment is the primary determinant of specific 4E-BP1 dephosphorylation by PP1-Neurabin
Source: eLife journal article supplement (doi:10.7554/elife.103403), 2024-11-20
Supplement: fig5-data1 [file replicate3.xlsx]

## Sheet: All Cycles
Well Row	Well Col	Content	Raw Data (425-10/460-20)	Raw Data (425-10/460-20)	Raw Data (425-10/460-20)				convert to phosphate	Well Row	Well Col	Raw Data (425-10/460-20)	Raw Data (425-10/460-20)	Raw Data (425-10/460-20)	Raw Data (425-10/460-20)	Raw Data (425-10/460-20)		normalize to the lasst column	Well Row	Well Col	Raw Data (425-10/460-20)	Raw Data (425-10/460-20)	Raw Data (425-10/460-20)	Raw Data (425-10/460-20)	Raw Data (425-10/460-20)						PP1-Neb 1 nM																PP1-Ph1 2.5 nM
		Time [s]	0	240	480							0	4	8	12	16					0	4	8	12	16						V1	V2	V3	V4	V5	V6	V7	P1	P2	P3	P4	P5	P6	P7	P8		V1	V2	V3
A	1	Sample X1	35685	46236	50263					A	1	1.50626	3.20307	4.41477	-0.272269	-0.272269			A	1	1.41169	3.11314	4.34966	0	0	0.425363	0			400	0.425363	0.0291293	0.0250641	0.0193156	0.0412897	0.21818	0.000365345	0.123582	0.00251059	0.0744323	0.0292101	0.0452474	-0.00354562	0.00215774	-0.00068541		0.479366	0.0473073	0.0727273
A	2	Sample X2	43064	50291	51284					A	2	2.53569	4.42524	4.82066	-0.272269	-0.272269			A	2	2.31272	4.23018	4.6243	0	0	0.479366	1			200	0.377579	0.0373885	0.0240832	0.0184612	0.0412158	0.144252	0.0638597	0.0446246	-0.00222145	0.101597	0.00794897	0.0313368	-0.00748886	0.00165948	0.000722054		1.16076	0.027731	0.0119867
A	3	Sample X3	34499	44860	48746					A	3	1.38441	2.89008	3.89555	-0.272269	-0.272269			A	3	1.28983	2.80015	3.83044	0	0	0.377579	0			100	0.345452	0.0307633	0.0219724	0.0182971	0.0370629	0.190259	0.0947714	0.0484502	-0.00127656	0.0909071	0.00497028	0.0637412	-0.002258	0.000905822	0.000900244		0.341424	0.0105967	0.0234033
A	4	Sample X4	46272	56175	58148					A	4	3.21182	7.82695	9.98003	-0.272269	-0.272269			A	4	2.98884	7.63189	9.78367	0	0	1.16076	1			50	0.512187	0.0316571	0.0228798	0.0155823	0.0302608	0.0838635	0.067316	0.0254341	-0.00324146	0.12338	0.00601979	0.0441378	0.000805213	0.00166776	-0.0025405		0.353865	0.0119358	0.0143912
A	5	Sample X5	33387	43701	48339					A	5	1.27797	2.65513	3.77061	-0.272269	-0.272269			A	5	1.18339	2.5652	3.7055	0	0	0.345452	0			25	0.204366	0.0287708	0.0181024	0.0112354	0.0278368	0.157327	0.054943	0.0260231	0.000621841	0.0641884	0.00728285	0.0286086	0.00268006	0.00251151	0.00134865		0.15757	0.00776879	0.0127991
A	6	Sample X6	32663	43143	44172					A	6	1.21237	2.55016	2.74773	-0.272269	-0.272269			A	6	0.989398	2.35509	2.55137	0	0	0.341424	0			12.5	0.221162	0.024148	0.0162927	0.00997488	0.0218172	0.135052	0.0469468	0.0184038	0.000959272	0.0520985	0.00437748	0.0260674	0.00246378	0.00156683	-0.000974342		0.0809873	0.00648911	0.013591
A	7	Sample X7	35092	47349	50445					A	7	1.4442	3.48831	4.48346	-0.272269	-0.272269			A	7	1.34963	3.39838	4.41835	0	0	0.512187	0			6.25	0.140977	0.0166576	0.0155237	0.00804709	0.0207544	0.0874546	0.0472766	0.0169727	-7.4248e-05	0.0381476	0.00563986	0.0229941	0.00396179	0.000960061	-3.14922e-05		0.0333805	0.000453673	0.00454452
A	8	Sample X8	29956	42164	44840					A	8	0.989832	2.37738	2.88582	-0.272269	-0.272269			A	8	0.766856	2.18232	2.68945	0	0	0.353865	0			3.125	0.103677	0.00857126	0.00761583	0.00744372	0.0120788	0.0526114	0.0328288	0.0100801	-0.00144126	0.0257034	0.00664223	0.0125592	0.00354008	0.00361737	0.000750713		0.013392	0.00234345	-0.000301532
A	9	Sample X9	27870	36996	40058					A	9	0.839348	1.65217	2.04826	-0.272269	-0.272269			A	9	0.744774	1.56224	1.98315	0	0	0.204366	0			1.5625	0.0584559	0.00564778	0.00550875	0.00277082	0.00780022	0.0334009	0.0247046	0.00720834	0.000541748	0.0129166	0.00385925	0.0087299	0.00392611	0.00334424	0.000324693		0.00922277	0.00160512	0.00262274
A	10	Sample X10	22811	31777	33830					A	10	0.533403	1.13577	1.31952	-0.272269	-0.272269			A	10	0.310427	0.940706	1.12315	0	0	0.15757	0			0.78125	0.034465	-0.00456626	0.00355921	0.00105049	0.00540527	0.0169343	0.0185451	0.00729166	-0.00215648	0.0089073	0.00354984	0.00694285	0.00427342	0.00256434	0.000230146		0.00679087	0.00173583	-0.00322602
A	11	Sample X11	26843	36986	41820					A	11	0.771004	1.65101	2.31986	-0.272269	-0.272269			A	11	0.676429	1.56108	2.25475	0	0	0.221162	0			0.390625	0.0137951	0.00209234	0.0046242	0.00102682	0.00388731	0.0137682	0.00995888	0.00140545	-0.00289168	0.00244907	0.00118455	0.00123248	0.00381319	0.000568788	-0.000360871		0.00309795	0.0021648	0.00112673
A	12	Sample X12	18594	24428	26798					A	12	0.327248	0.623285	0.768089	-0.272269	-0.272269			A	12	0.104273	0.428222	0.571727	0	0	0.0809873	0			0	0	0	0	0	0	0	0	0	0	0	0	0	0	0	0		0	0	0
A	13	Sample X13	22791	31245	35651					A	13	0.532332	1.0916	1.50264	-0.272269	-0.272269			A	13	0.437758	1.00167	1.43753	0	0	0.140977	0
A	14	Sample X14	14945	17545	19526					A	14	0.175817	0.281427	0.369658	-0.272269	-0.272269			A	14	-0.0471585	0.0863634	0.173296	0	0	0.0333805	0				3	27	51	75	99	123	147	171	195	219	243	267	291	315	339		3	27	51
A	15	Sample X15	21212	28182	31738					A	15	0.450764	0.860827	1.13249	-0.272269	-0.272269			A	15	0.35619	0.770896	1.06737	0	0	0.103677	0				PP1-Neb 1 nM																PP1-Ph1 2.5 nM
A	16	Sample X16	14131	14808	16053					A	16	0.144888	0.170544	0.219505	-0.272269	-0.272269			A	16	-0.0780873	-0.0245192	0.0231429	0	0	0.013392	0				V1	V2	V3	V4	V5	V6	V7	P1	P2	P3	P4	P5	P6	P7	P8		V1	V2	V3
A	17	Sample X17	18796	23402	24807					A	17	0.336301	0.565481	0.645349	-0.272269	-0.272269			A	17	0.241727	0.47555	0.580235	0	0	0.0584559	0		0	400	0.425363	0.0291293	0.0250641	0.0193156	0.0412897	0.21818	na	0.123582	0.00251059	0.0744323	0.0292101	0.0452474	-0.00354562	0.00215774	-0.00068541		na	0.0473073	0.0727273
A	18	Sample X18	15812	16036	16757					A	18	0.209842	0.218821	0.248265	-0.272269	-0.272269			A	18	-0.013134	0.023757	0.0519024	0	0	0.00922277	0		2	200	0.377579	0.0373885	0.0240832	0.0184612	0.0412158	0.144252	0.0638597	0.0446246	-0.00222145	0.101597	0.00794897	0.0313368	-0.00748886	0.00165948	0.000722054		na	0.027731	0.0119867
A	19	Sample X19	16105	19204	20380					A	19	0.221602	0.354819	0.410007	-0.272269	-0.272269			A	19	0.127028	0.264888	0.344893	0	0	0.034465	0		4	100	0.345452	0.0307633	0.0219724	0.0182971	0.0370629	0.190259	0.0947714	0.0484502	-0.00127656	0.0909071	0.00497028	0.0637412	-0.002258	0.000905822	0.000900244		0.341424	0.0105967	0.0234033
A	20	Sample X20	15498	15479	15813					A	20	0.197387	0.196638	0.209882	-0.272269	-0.272269			A	20	-0.0255889	0.00157455	0.0135193	0	0	0.00679087	0		6	50	0.512187	0.0316571	0.0228798	0.0155823	0.0302608	0.0838635	0.067316	0.0254341	-0.00324146	0.12338	0.00601979	0.0441378	0.000805213	0.00166776	-0.0025405		0.353865	0.0119358	0.0143912
A	21	Sample X21	12671	14061	15084					A	21	0.091736	0.142273	0.181196	-0.272269	-0.272269			A	21	-0.00283837	0.0523422	0.116082	0	0	0.0137951	0		8	25	0.204366	0.0287708	0.0181024	0.0112354	0.0278368	0.157327	0.054943	0.0260231	0.000621841	0.0641884	0.00728285	0.0286086	0.00268006	0.00251151	0.00134865		0.15757	0.00776879	0.0127991
A	22	Sample X22	15739	15346	15587					A	22	0.206933	0.191412	0.200902	-0.272269	-0.272269			A	22	-0.0160432	-0.00365141	0.00453925	0	0	0.00309795	0		10	12.5	0.221162	0.024148	0.0162927	0.00997488	0.0218172	0.135052	0.0469468	0.0184038	0.000959272	0.0520985	0.00437748	0.0260674	0.00246378	0.00156683	-0.000974342		0.0809873	0.00648911	0.013591
A	23	Sample X23	12751	12620	11909					A	23	0.0945744	0.0899309	0.0651137	-0.272269	-0.272269			A	23	0	0	0	0	0	0	0		12	6.25	0.140977	0.0166576	0.0155237	0.00804709	0.0207544	0.0874546	0.0472766	0.0169727	-7.4248e-05	0.0381476	0.00563986	0.0229941	0.00396179	0.000960061	-3.14922e-05		0.0333805	0.000453673	0.00454452
A	24	Sample X24	16139	15439	15472					A	24	0.222976	0.195064	0.196362	-0.272269	-0.272269			A	24	0	0	0	0	0	0	0		14	3.125	0.103677	0.00857126	0.00761583	0.00744372	0.0120788	0.0526114	0.0328288	0.0100801	-0.00144126	0.0257034	0.00664223	0.0125592	0.00354008	0.00361737	0.000750713		0.013392	0.00234345	-0.000301532
B	1	Sample X25	15842	18543	20487					B	1	0.21104	0.324975	0.415167	-0.272269	-0.272269			B	1	0.035261	0.151778	0.25086	0	0	0.0291293	0		16	1.5625	0.0584559	0.00564778	0.00550875	0.00277082	0.00780022	0.0334009	0.0247046	0.00720834	0.000541748	0.0129166	0.00385925	0.0087299	0.00392611	0.00334424	0.000324693		0.00922277	0.00160512	0.00262274
B	2	Sample X26	17522	21321	23064					B	2	0.280444	0.456214	0.54703	-0.272269	-0.272269			B	2	0.228537	0.417766	0.515224	0	0	0.0473073	0		18	0.78125	0.034465	-0.00456626	0.00355921	0.00105049	0.00540527	0.0169343	0.0185451	0.00729166	-0.00215648	0.0089073	0.00354984	0.00694285	0.00427342	0.00256434	0.000230146		0.00679087	0.00173583	-0.00322602
B	3	Sample X27	17594	20802	23152					B	3	0.283524	0.430496	0.551806	-0.272269	-0.272269			B	3	0.107745	0.257299	0.3875	0	0	0.0373885	0		20	0.390625	0.0137951	0.00209234	0.0046242	0.00102682	0.00388731	0.0137682	0.00995888	0.00140545	-0.00289168	0.00244907	0.00118455	0.00123248	0.00381319	0.000568788	-0.000360871		0.00309795	0.0021648	0.00112673
B	4	Sample X28	15823	18153	19614					B	4	0.210281	0.307745	0.373748	-0.272269	-0.272269			B	4	0.158374	0.269298	0.341943	0	0	0.027731	0		22	0	0	0	0	0	0	0	0	0	0	0	0	0	0	0	0		0	0	0
B	5	Sample X29	14593	17577	19742					B	5	0.162325	0.282796	0.379726	-0.272269	-0.272269			B	5	-0.013454	0.109599	0.215419	0	0	0.0307633	0
B	6	Sample X30	12380	13193	13060					B	6	0.0814816	0.110409	0.105617	-0.272269	-0.272269			B	6	0.0295746	0.0719613	0.0738109	0	0	0.0105967	0
B	7	Sample X31	15734	18673	20568					B	7	0.206734	0.33078	0.419089	-0.272269	-0.272269			B	7	0.0309549	0.157583	0.254782	0	0	0.0316571	0
B	8	Sample X32	14243	15140	15677					B	8	0.149087	0.183371	0.204468	-0.272269	-0.272269			B	8	0.0971804	0.144923	0.172662	0	0	0.0119358	0
B	9	Sample X33	14903	17668	19604					B	9	0.174198	0.286699	0.373283	-0.272269	-0.272269			B	9	-0.0015809	0.113502	0.208976	0	0	0.0287708	0
B	10	Sample X34	14228	14693	15196					B	10	0.148524	0.166139	0.18555	-0.272269	-0.272269			B	10	0.096617	0.127692	0.153745	0	0	0.00776879	0
B	11	Sample X35	13602	16048	17404					B	11	0.125294	0.219304	0.275416	-0.272269	-0.272269			B	11	-0.0504847	0.0461072	0.111109	0	0	0.024148	0
B	12	Sample X36	13887	14222	14702					B	12	0.135802	0.148299	0.166483	-0.272269	-0.272269			B	12	0.0838951	0.109852	0.134678	0	0	0.00648911	0
B	13	Sample X37	13572	15265	15545					B	13	0.124194	0.188243	0.199241	-0.272269	-0.272269			B	13	-0.0515843	0.015046	0.0349349	0	0	0.0166576	0
B	14	Sample X38	14394	14084	14544					B	14	0.154777	0.143132	0.160461	-0.272269	-0.272269			B	14	0.10287	0.104684	0.128655	0	0	0.000453673	0
B	15	Sample X39	13529	14382	14674					B	15	0.122621	0.154323	0.165413	-0.272269	-0.272269			B	15	-0.0531582	-0.0188731	0.00110694	0	0	0.00857126	0
B	16	Sample X40	12807	12692	13049					B	16	0.0965663	0.0924803	0.105221	-0.272269	-0.272269			B	16	0.0446593	0.0540331	0.0734156	0	0	0.00234345	0
B	17	Sample X41	12329	12895	12930					B	17	0.0796957	0.0997046	0.100956	-0.272269	-0.272269			B	17	-0.096083	-0.0734919	-0.0633509	0	0	0.00564778	0
B	18	Sample X42	12593	12393	12230					B	18	0.0889767	0.0819374	0.0762383	-0.272269	-0.272269			B	18	0.0370697	0.0434901	0.0444326	0	0	0.00160512	0
B	19	Sample X43	13953	13386	13095					B	19	0.138252	0.117404	0.106875	-0.272269	-0.272269			B	19	-0.0375271	-0.0557921	-0.0574311	0	0	-0.00456626	0
B	20	Sample X44	9469	9262	8893					B	20	-0.0153889	-0.0219053	-0.0334064	-0.272269	-0.272269			B	20	-0.0672959	-0.0603525	-0.0652122	0	0	0.00173583	0
B	21	Sample X45	13830	13986	13891					B	21	0.133691	0.139479	0.13595	-0.272269	-0.272269			B	21	-0.0420873	-0.0337179	-0.0283562	0	0	0.00209234	0
B	22	Sample X46	11455	11313	11036					B	22	0.0495994	0.0447988	0.0355045	-0.272269	-0.272269			B	22	-0.00230756	0.00635164	0.00369869	0	0	0.0021648	0
B	23	Sample X47	14944	14877	14645					B	23	0.175779	0.173197	0.164307	-0.272269	-0.272269			B	23	0	0	0	0	0	0	0
B	24	Sample X48	11523	11124	10925					B	24	0.051907	0.0384472	0.0318058	-0.272269	-0.272269			B	24	0	0	0	0	0	0	0
C	1	Sample X49	17782	19894	21457					C	1	0.291609	0.386865	0.46305	-0.272269	-0.272269			C	1	0.242653	0.342909	0.428913	0	0	0.0250641	0
C	2	Sample X50	19525	25069	27275					C	2	0.369612	0.660835	0.799322	-0.272269	-0.272269			C	2	0.293164	0.584073	0.75799	0	0	0.0727273	0
C	3	Sample X51	16456	18593	20119					C	3	0.23587	0.327204	0.397519	-0.272269	-0.272269			C	3	0.186915	0.283248	0.363383	0	0	0.0240832	0
C	4	Sample X52	5913	7588	8351					C	4	-0.121196	-0.072935	-0.0500372	-0.272269	-0.272269			C	4	-0.197643	-0.149696	-0.0913693	0	0	0.0119867	0
C	5	Sample X53	15188	17232	19009					C	5	0.185239	0.268129	0.345929	-0.272269	-0.272269			C	5	0.136283	0.224173	0.311792	0	0	0.0219724	0
C	6	Sample X54	13356	15822	16775					C	6	0.116314	0.210241	0.249011	-0.272269	-0.272269			C	6	0.0398662	0.13348	0.207679	0	0	0.0234033	0
C	7	Sample X55	14938	17088	18321					C	7	0.175547	0.262067	0.315133	-0.272269	-0.272269			C	7	0.126592	0.218111	0.280997	0	0	0.0228798	0
C	8	Sample X56	14026	15535	16369					C	8	0.140968	0.198847	0.232315	-0.272269	-0.272269			C	8	0.0645205	0.122085	0.190983	0	0	0.0143912	0
C	9	Sample X57	14154	15895	16962					C	9	0.145749	0.21316	0.256791	-0.272269	-0.272269			C	9	0.0967936	0.169203	0.222655	0	0	0.0181024	0
C	10	Sample X58	13475	14850	15320					C	10	0.120648	0.172158	0.190394	-0.272269	-0.272269			C	10	0.0442	0.0953965	0.149062	0	0	0.0127991	0
C	11	Sample X59	15929	17387	18174					C	11	0.214522	0.274693	0.308666	-0.272269	-0.272269			C	11	0.165566	0.230737	0.274529	0	0	0.0162927	0
C	12	Sample X60	12887	14376	14548					C	12	0.0994189	0.154097	0.160613	-0.272269	-0.272269			C	12	0.0229714	0.0773355	0.119281	0	0	0.013591	0
C	13	Sample X61	13526	15043	14971					C	13	0.122511	0.179606	0.176821	-0.272269	-0.272269			C	13	0.0735551	0.13565	0.142685	0	0	0.0155237	0
C	14	Sample X62	11058	11606	11496					C	14	0.0362393	0.0547312	0.0509901	-0.272269	-0.272269			C	14	-0.0402082	-0.0220301	0.00965802	0	0	0.00454452	0
C	15	Sample X63	12570	13282	13357					C	15	0.0881645	0.113628	0.11635	-0.272269	-0.272269			C	15	0.0392089	0.0696722	0.0822135	0	0	0.00761583	0
C	16	Sample X64	11813	11787	11673					C	16	0.0618119	0.0609196	0.0570172	-0.272269	-0.272269			C	16	-0.0146356	-0.0158418	0.0156852	0	0	-0.000301532	0
C	17	Sample X65	12365	12847	12947					C	17	0.080956	0.0979915	0.101564	-0.272269	-0.272269			C	17	0.0320003	0.0540353	0.0674274	0	0	0.00550875	0
C	18	Sample X66	13420	13715	13195					C	18	0.118642	0.129447	0.110481	-0.272269	-0.272269			C	18	0.0421946	0.0526855	0.0691488	0	0	0.00262274	0
C	19	Sample X67	12723	12982	12647					C	19	0.09358	0.102817	0.0908862	-0.272269	-0.272269			C	19	0.0446244	0.0588612	0.0567496	0	0	0.00355921	0
C	20	Sample X68	12048	11682	11280					C	20	0.069915	0.0573247	0.0436867	-0.272269	-0.272269			C	20	-0.00653254	-0.0194366	0.00235469	0	0	-0.00322602	0
C	21	Sample X69	12050	12437	11968					C	21	0.0699842	0.0834816	0.0671487	-0.272269	-0.272269			C	21	0.0210286	0.0395254	0.0330121	0	0	0.0046242	0
C	22	Sample X70	11626	11767	10908					C	22	0.055413	0.0602338	0.0312406	-0.272269	-0.272269			C	22	-0.0210345	-0.0165275	-0.0100914	0	0	0.00112673	0
C	23	Sample X71	11436	11288	10995					C	23	0.0489557	0.0439562	0.0341366	-0.272269	-0.272269			C	23	0	0	0	0	0	0	0
C	24	Sample X72	12236	12245	11210					C	24	0.0764475	0.0767614	0.041332	-0.272269	-0.272269			C	24	0	0	0	0	0	0	0
D	1	Sample X73	17752	19307	20812					D	1	0.290314	0.359544	0.430986	-0.272269	-0.272269			D	1	0.236639	0.313901	0.378841	0	0	0.0193156	0
D	2	Sample X74	17679	21413	23134					D	2	0.287172	0.460833	0.550828	-0.272269	-0.272269			D	2	0.544934	0.718406	0.810486	0	0	0.043368	0
D	3	Sample X75	16050	17633	18829					D	3	0.219384	0.285196	0.337787	-0.272269	-0.272269			D	3	0.165709	0.239554	0.285642	0	0	0.0184612	0
D	4	Sample X76	5686	6871	7661					D	4	-0.127533	-0.0939226	-0.0707697	-0.272269	-0.272269			D	4	0.130229	0.16365	0.188889	0	0	0.00835521	0
D	5	Sample X77	13830	15535	16823					D	5	0.133691	0.198847	0.251002	-0.272269	-0.272269			D	5	0.080016	0.153204	0.198857	0	0	0.0182971	0
D	6	Sample X78	16139	17257	17261					D	6	0.222976	0.269185	0.269354	-0.272269	-0.272269			D	6	0.480738	0.526758	0.529013	0	0	0.0115048	0
D	7	Sample X79	14752	16132	16778					D	7	0.168397	0.222693	0.249135	-0.272269	-0.272269			D	7	0.114721	0.177051	0.19699	0	0	0.0155823	0
D	8	Sample X80	14135	15007	15116					D	8	0.145038	0.178213	0.182438	-0.272269	-0.272269			D	8	0.402801	0.435785	0.442097	0	0	0.0082462	0
D	9	Sample X81	13952	14927	15310					D	9	0.138214	0.175123	0.190002	-0.272269	-0.272269			D	9	0.084539	0.129481	0.137857	0	0	0.0112354	0
D	10	Sample X82	14285	14678	14463					D	10	0.150667	0.165566	0.157387	-0.272269	-0.272269			D	10	0.408429	0.423139	0.417046	0	0	0.00367745	0
D	11	Sample X83	12914	13791	13854					D	11	0.100384	0.13225	0.13458	-0.272269	-0.272269			D	11	0.0467082	0.0866077	0.0824347	0	0	0.00997488	0
D	12	Sample X84	13974	14813	14406					D	12	0.139032	0.170736	0.15523	-0.272269	-0.272269			D	12	0.396795	0.428309	0.414889	0	0	0.00787853	0
D	13	Sample X85	12808	13478	13105					D	13	0.0966019	0.120757	0.107235	-0.272269	-0.272269			D	13	0.0429265	0.0751148	0.0550905	0	0	0.00804709	0
D	14	Sample X86	12405	13012	13190					D	14	0.0823583	0.103893	0.1103	-0.272269	-0.272269			D	14	0.340121	0.361466	0.369959	0	0	0.00533624	0
D	15	Sample X87	12305	12920	12316					D	15	0.0788564	0.100598	0.0792409	-0.272269	-0.272269			D	15	0.025181	0.0549558	0.0270961	0	0	0.00744372	0
D	16	Sample X88	12395	12797	12601					D	16	0.0820075	0.0962103	0.0892593	-0.272269	-0.272269			D	16	0.33977	0.353783	0.348918	0	0	0.00350323	0
D	17	Sample X89	13294	13378	12828					D	17	0.114063	0.117113	0.0973143	-0.272269	-0.272269			D	17	0.0603879	0.0714712	0.0451694	0	0	0.00277082	0
D	18	Sample X90	12548	12698	12316					D	18	0.0873883	0.092693	0.0792409	-0.272269	-0.272269			D	18	0.345151	0.350266	0.3389	0	0	0.00127872	0
D	19	Sample X91	11276	11162	11490					D	19	0.043552	0.0397208	0.0507864	-0.272269	-0.272269			D	19	-0.0101234	-0.00592143	-0.00135842	0	0	0.00105049	0
D	20	Sample X92	11976	11721	12040					D	20	0.067425	0.0586584	0.069638	-0.272269	-0.272269			D	20	0.325188	0.316231	0.329297	0	0	-0.00223911	0
D	21	Sample X93	11712	11597	11632					D	21	0.0583505	0.0544246	0.0556177	-0.272269	-0.272269			D	21	0.00467506	0.00878235	0.00347285	0	0	0.00102682	0
D	22	Sample X94	13382	13447	12904					D	22	0.117259	0.119626	0.100026	-0.272269	-0.272269			D	22	0.375022	0.377199	0.359685	0	0	0.000544317	0
D	23	Sample X95	11575	11338	11530					D	23	0.0536754	0.0456422	0.0521448	-0.272269	-0.272269			D	23	0	0	0	0	0	0	0
D	24	Sample X96	617	625	537					D	24	-0.257763	-0.257573	-0.259659	-0.272269	-0.272269			D	24	0	0	0	0	0	0	1
E	1	Sample X97	19607	22836	25112					E	1	0.373423	0.534743	0.663395	-0.272269	-0.272269			E	1	0.352231	0.51739	0.654905	0	0	0.0412897	0
E	2	Sample X98	46485	54110	55437					E	2	3.2642	6.27941	7.21041	-0.272269	-0.272269			E	2	3.51359	6.52933	7.46117	0	0	0.753936	1
E	3	Sample X99	18377	21764	24187					E	3	0.317607	0.478632	0.609459	-0.272269	-0.272269			E	3	0.296416	0.461279	0.600969	0	0	0.0412158	0
E	4	Sample X100	40544	49760	52240					E	4	2.11956	4.23249	5.25162	-0.272269	-0.272269			E	4	2.36895	4.4824	5.50237	0	0	0.528363	0
E	5	Sample X101	17705	20847	23075					E	5	0.28829	0.432703	0.547626	-0.272269	-0.272269			E	5	0.267098	0.41535	0.539136	0	0	0.0370629	0
E	6	Sample X102	32981	41745	42537					E	6	1.24084	2.30753	2.44158	-0.272269	-0.272269			E	6	1.49023	2.55744	2.69233	0	0	0.266803	0
E	7	Sample X103	15373	18197	19995					E	7	0.192471	0.309675	0.391635	-0.272269	-0.272269			E	7	0.171279	0.292323	0.383146	0	0	0.0302608	0
E	8	Sample X104	25376	32895	34591					E	8	0.679228	1.23309	1.39354	-0.272269	-0.272269			E	8	0.928617	1.48301	1.6443	0	0	0.138597	0
E	9	Sample X105	14868	17520	18990					E	9	0.17285	0.280359	0.345067	-0.272269	-0.272269			E	9	0.151659	0.263006	0.336577	0	0	0.0278368	0
E	10	Sample X106	21319	27703	29124					E	10	0.456113	0.827992	0.927824	-0.272269	-0.272269			E	10	0.705503	1.07791	1.17858	0	0	0.0931014	0
E	11	Sample X107	14154	16292	17300					E	11	0.145749	0.229179	0.271004	-0.272269	-0.272269			E	11	0.124558	0.211826	0.262514	0	0	0.0218172	0
E	12	Sample X108	16874	22411	23320					E	12	0.253123	0.512174	0.560979	-0.272269	-0.272269			E	12	0.502512	0.762091	0.811734	0	0	0.0648948	0
E	13	Sample X109	13551	15630	15931					E	13	0.123425	0.202604	0.214602	-0.272269	-0.272269			E	13	0.102234	0.185251	0.206112	0	0	0.0207544	0
E	14	Sample X110	14888	17920	18479					E	14	0.17362	0.297582	0.322128	-0.272269	-0.272269			E	14	0.423009	0.547499	0.572883	0	0	0.0311224	0
E	15	Sample X111	12160	13410	13362					E	15	0.0738013	0.118278	0.116532	-0.272269	-0.272269			E	15	0.0526098	0.100925	0.108042	0	0	0.0120788	0
E	16	Sample X112	13063	14933	14932					E	16	0.105725	0.175354	0.175316	-0.272269	-0.272269			E	16	0.355114	0.425271	0.426071	0	0	0.0175393	0
E	17	Sample X113	12082	12860	12544					E	17	0.0710931	0.0984552	0.0872472	-0.272269	-0.272269			E	17	0.0499016	0.0811025	0.0787577	0	0	0.00780022	0
E	18	Sample X114	13701	14610	14716					E	18	0.128931	0.162972	0.167019	-0.272269	-0.272269			E	18	0.378321	0.412889	0.417774	0	0	0.00864205	0
E	19	Sample X115	12416	12918	12445					E	19	0.0827442	0.100527	0.0837626	-0.272269	-0.272269			E	19	0.0615527	0.0831738	0.0752731	0	0	0.00540527	0
E	20	Sample X116	13495	14126	14025					E	20	0.121378	0.144701	0.140931	-0.272269	-0.272269			E	20	0.370767	0.394618	0.391686	0	0	0.00596276	0
E	21	Sample X117	11081	11429	11083					E	21	0.0370081	0.0487186	0.037075	-0.272269	-0.272269			E	21	0.0158166	0.0313659	0.0285855	0	0	0.00388731	0
E	22	Sample X118	12529	13199	12460					E	22	0.0867185	0.110625	0.0842898	-0.272269	-0.272269			E	22	0.336108	0.360542	0.335045	0	0	0.00610857	0
E	23	Sample X119	10604	10487	10215					E	23	0.0211915	0.0173527	0.00848955	-0.272269	-0.272269			E	23	0	0	0	0	0	0	0
E	24	Sample X120	968	946	911					E	24	-0.249389	-0.249917	-0.250755	-0.272269	-0.272269			E	24	0	0	0	0	0	0	1
F	1	Sample X121	34012	41123	44240					F	1	1.33691	2.208	2.76142	-0.272269	-0.272269			F	1	1.26592	2.13864	2.71138	0	0	0.21818	0
F	2	Sample X122	43689	50645	52614					F	2	2.65282	4.5607	5.4358	-0.272269	-0.272269			F	2	1.71512	3.58686	4.58376	0	0	0.467934	1
F	3	Sample X123	29163	35683	38269					F	3	0.93067	1.50605	1.80659	-0.272269	-0.272269			F	3	0.859681	1.43669	1.75655	0	0	0.144252	0
F	4	Sample X124	34799	43326	46884					F	4	1.41438	2.58404	3.3653	-0.272269	-0.272269			F	4	0.476683	1.61019	2.51326	0	0	0.283378	0
F	5	Sample X125	29554	37560	40941					F	5	0.959527	1.71894	2.17978	-0.272269	-0.272269			F	5	0.888538	1.64957	2.12974	0	0	0.190259	0
F	6	Sample X126	22926	29233	30326					F	6	0.539578	0.935792	1.01831	-0.272269	-0.272269			F	6	-0.398122	-0.0380519	0.166269	0	0	0.0900176	0
F	7	Sample X127	22130	27752	30408					F	7	0.497488	0.831314	1.0247	-0.272269	-0.272269			F	7	0.426499	0.761953	0.974661	0	0	0.0838635	0
F	8	Sample X128	21746	27868	29865					F	8	0.477713	0.839212	0.982914	-0.272269	-0.272269			F	8	-0.459987	-0.134633	0.130872	0	0	0.0813387	0
F	9	Sample X129	26546	34450	36994					F	9	0.751886	1.37956	1.65194	-0.272269	-0.272269			F	9	0.680897	1.3102	1.6019	0	0	0.157327	0
F	10	Sample X130	15308	19433	20627					F	10	0.189924	0.365351	0.421954	-0.272269	-0.272269			F	10	-0.747776	-0.608493	-0.430089	0	0	0.0348208	0
F	11	Sample X131	24774	32317	35439					F	11	0.643412	1.18199	1.48023	-0.272269	-0.272269			F	11	0.572423	1.11263	1.43019	0	0	0.135052	0
F	12	Sample X132	15361	18752	19977					F	12	0.192	0.334323	0.390784	-0.272269	-0.272269			F	12	-0.7457	-0.639522	-0.461259	0	0	0.0265445	0
F	13	Sample X133	20434	26685	29207					F	13	0.412608	0.760798	0.933888	-0.272269	-0.272269			F	13	0.341619	0.691437	0.883848	0	0	0.0874546	0
F	14	Sample X134	12856	13739	14948					F	14	0.0983125	0.130331	0.175933	-0.272269	-0.272269			F	14	-0.839387	-0.843513	-0.67611	0	0	-0.00103142	0
F	15	Sample X135	17070	21597	23998					F	15	0.261312	0.470129	0.598724	-0.272269	-0.272269			F	15	0.190323	0.400768	0.548684	0	0	0.0526114	0
F	16	Sample X136	12613	13503	14130					F	16	0.0896834	0.12167	0.144851	-0.272269	-0.272269			F	16	-0.848016	-0.852174	-0.707192	0	0	-0.00103945	0
F	17	Sample X137	15993	19078	19862					F	17	0.217091	0.349066	0.385359	-0.272269	-0.272269			F	17	0.146102	0.279705	0.335318	0	0	0.0334009	0
F	18	Sample X138	13712	14827	14803					F	18	0.129336	0.171274	0.170352	-0.272269	-0.272269			F	18	-0.808363	-0.80257	-0.68169	0	0	0.00144827	0
F	19	Sample X139	12887	14677	15228					F	19	0.0994189	0.165528	0.186798	-0.272269	-0.272269			F	19	0.0284298	0.096167	0.136758	0	0	0.0169343	0
F	20	Sample X140	12732	13330	13377					F	20	0.0938995	0.115369	0.117077	-0.272269	-0.272269			F	20	-0.8438	-0.858475	-0.734966	0	0	-0.00366865	0
F	21	Sample X141	13328	14761	15133					F	21	0.115297	0.168742	0.183099	-0.272269	-0.272269			F	21	0.0443077	0.0993806	0.133058	0	0	0.0137682	0
F	22	Sample X142	847	759	745					F	22	-0.252286	-0.254386	-0.254719	-0.272269	-0.272269			F	22	-1.18999	-1.22823	-1.10676	0	0	-0.00956109	1
F	23	Sample X143	12079	12032	11468					F	23	0.0709891	0.0693611	0.0500401	-0.272269	-0.272269			F	23	0	0	0	0	0	0	0
F	24	Sample X144	29259	29745	28055					F	24	0.9377	0.973844	0.852043	-0.272269	-0.272269			F	24	0	0	0	0	0	0	0
G	1	Sample X145	220	256	275					G	1	-0.267127	-0.266283	-0.265837	-0.272269	-0.272269			G	1	-0.327361	-0.3259	-0.313303	0	0	0.000365345	1
G	2	Sample X146	31857	40390	43513					G	2	1.14253	2.09669	2.61921	-0.272269	-0.272269			G	2	1.09178	2.05666	2.58354	0	0	0.241222	0
G	3	Sample X147	18297	23464	27464					G	3	0.314075	0.568897	0.811906	-0.272269	-0.272269			G	3	0.253841	0.50928	0.764439	0	0	0.0638597	0
G	4	Sample X148	35226	43418	46149					G	4	1.45802	2.60127	3.18206	-0.272269	-0.272269			G	4	1.40727	2.56125	3.14639	0	0	0.288494	0
G	5	Sample X149	19207	26255	30939					G	5	0.354956	0.733425	1.06678	-0.272269	-0.272269			G	5	0.294722	0.673808	1.01931	0	0	0.0947714	0
G	6	Sample X150	28173	35713	38616					G	6	0.860203	1.50925	1.85108	-0.272269	-0.272269			G	6	0.80945	1.46923	1.81541	0	0	0.164944	0
G	7	Sample X151	18027	23500	27498					G	7	0.302237	0.570885	0.814182	-0.272269	-0.272269			G	7	0.242004	0.511268	0.766715	0	0	0.067316	0
G	8	Sample X152	22938	28947	31605					G	8	0.540224	0.914983	1.12134	-0.272269	-0.272269			G	8	0.489471	0.87496	1.08567	0	0	0.0963722	0
G	9	Sample X153	16474	21312	24477					G	9	0.236607	0.455763	0.626116	-0.272269	-0.272269			G	9	0.176374	0.396146	0.578649	0	0	0.054943	0
G	10	Sample X154	20545	25746	27136					G	10	0.417974	0.70176	0.790143	-0.272269	-0.272269			G	10	0.367221	0.661737	0.754472	0	0	0.073629	0
G	11	Sample X155	15436	19793	22621					G	11	0.194946	0.382116	0.523272	-0.272269	-0.272269			G	11	0.134712	0.322499	0.475805	0	0	0.0469468	0
G	12	Sample X156	15900	19392	19859					G	12	0.21336	0.363458	0.385217	-0.272269	-0.272269			G	12	0.162607	0.323436	0.349546	0	0	0.0402071	0
G	13	Sample X157	14923	19392	21204					G	13	0.174969	0.363458	0.450365	-0.272269	-0.272269			G	13	0.114735	0.303841	0.402898	0	0	0.0472766	0
G	14	Sample X158	14888	17171	18066					G	14	0.17362	0.265557	0.303939	-0.272269	-0.272269			G	14	0.122868	0.225534	0.268268	0	0	0.0256666	0
G	15	Sample X159	13882	17189	18734					G	15	0.135617	0.266315	0.333514	-0.272269	-0.272269			G	15	0.0753829	0.206698	0.286048	0	0	0.0328288	0
G	16	Sample X160	13503	14934	15562					G	16	0.12167	0.175393	0.199913	-0.272269	-0.272269			G	16	0.0709176	0.13537	0.164242	0	0	0.0161132	0
G	17	Sample X161	12643	15283	16320					G	17	0.0907446	0.188946	0.230319	-0.272269	-0.272269			G	17	0.0305107	0.129329	0.182852	0	0	0.0247046	0
G	18	Sample X162	12923	14100	14526					G	18	0.100705	0.143729	0.159777	-0.272269	-0.272269			G	18	0.0499529	0.103707	0.124106	0	0	0.0134385	0
G	19	Sample X163	13074	15045	15945					G	19	0.10612	0.179684	0.215163	-0.272269	-0.272269			G	19	0.0458862	0.120067	0.167697	0	0	0.0185451	0
G	20	Sample X164	13315	14068	14489					G	20	0.114825	0.142534	0.158373	-0.272269	-0.272269			G	20	0.0640725	0.102512	0.122702	0	0	0.00960979	0
G	21	Sample X165	13279	14340	14887					G	21	0.11352	0.152738	0.173582	-0.272269	-0.272269			G	21	0.0532859	0.0931214	0.126115	0	0	0.00995888	0
G	22	Sample X166	14647	15427	14869					G	22	0.164383	0.194592	0.172889	-0.272269	-0.272269			G	22	0.11363	0.154569	0.137217	0	0	0.0102346	0
G	23	Sample X167	11767	11749	11392					G	23	0.0602338	0.059617	0.0474666	-0.272269	-0.272269			G	23	0	0	0	0	0	0	0
G	24	Sample X168	11489	11171	11041					G	24	0.0507525	0.0400227	0.0356714	-0.272269	-0.272269			G	24	0	0	0	0	0	0	0
H	1	Sample X169	30308	35731	38708					H	1	1.01691	1.51117	1.86306	-0.272269	-0.272269			H	1	0.981575	1.4759	1.84734	0	0	0.123582	0
H	2	Sample X170	23235	28995	31382					H	2	0.556329	0.918453	1.10285	-0.272269	-0.272269			H	2	0.391259	0.744256	0.959192	0	0	0.0882491	0
H	3	Sample X171	18303	22039	24120					H	3	0.314339	0.492771	0.605642	-0.272269	-0.272269			H	3	0.279002	0.4575	0.589925	0	0	0.0446246	0
H	4	Sample X172	18769	22690	24199					H	4	0.335087	0.526941	0.610143	-0.272269	-0.272269			H	4	0.170017	0.352743	0.466489	0	0	0.0456816	0
H	5	Sample X173	18296	22327	24849					H	5	0.314031	0.507765	0.647819	-0.272269	-0.272269			H	5	0.278693	0.472494	0.632102	0	0	0.0484502	0
H	6	Sample X174	18099	20601	21762					H	6	0.305381	0.42069	0.47853	-0.272269	-0.272269			H	6	0.140311	0.246493	0.334875	0	0	0.0265453	0
H	7	Sample X175	15691	18129	19966					H	7	0.205024	0.306694	0.390264	-0.272269	-0.272269			H	7	0.169687	0.271423	0.374547	0	0	0.0254341	0
H	8	Sample X176	15998	17473	18399					H	8	0.217292	0.278353	0.318581	-0.272269	-0.272269			H	8	0.052222	0.104155	0.174926	0	0	0.0129833	0
H	9	Sample X177	14913	17479	18524					H	9	0.174583	0.278609	0.324129	-0.272269	-0.272269			H	9	0.139246	0.243338	0.308412	0	0	0.0260231	0
H	10	Sample X178	12895	13899	14339					H	10	0.0997046	0.136247	0.152701	-0.272269	-0.272269			H	10	-0.0653652	-0.0379508	0.00904604	0	0	0.00685359	0
H	11	Sample X179	14095	15993	16679					H	11	0.143543	0.217091	0.245039	-0.272269	-0.272269			H	11	0.108205	0.18182	0.229322	0	0	0.0184038	0
H	12	Sample X180	12510	13105	13530					H	12	0.0860491	0.107235	0.122657	-0.272269	-0.272269			H	12	-0.0790207	-0.0669625	-0.0209976	0	0	0.00301457	0
H	13	Sample X181	13005	14832	15104					H	13	0.103642	0.171466	0.181972	-0.272269	-0.272269			H	13	0.0683044	0.136195	0.166255	0	0	0.0169727	0
H	14	Sample X182	11199	11883	12218					H	14	0.0409625	0.0642184	0.0758201	-0.272269	-0.272269			H	14	-0.124107	-0.109979	-0.0678345	0	0	0.00353196	0
H	15	Sample X183	12081	13218	13424					H	15	0.0710584	0.111312	0.118788	-0.272269	-0.272269			H	15	0.0357209	0.0760411	0.103071	0	0	0.0100801	0
H	16	Sample X184	12306	12193	11898					H	16	0.0788913	0.0749494	0.0647348	-0.272269	-0.272269			H	16	-0.0861785	-0.0992484	-0.0789198	0	0	-0.00326747	0
H	17	Sample X185	11756	12583	13000					H	17	0.0598569	0.0886235	0.103463	-0.272269	-0.272269			H	17	0.0245193	0.0533527	0.0877456	0	0	0.00720834	0
H	18	Sample X186	13001	12962	12944					H	18	0.103499	0.102101	0.101457	-0.272269	-0.272269			H	18	-0.0615713	-0.0720969	-0.0421981	0	0	-0.0026314	0
H	19	Sample X187	12778	13584	12796					H	19	0.0955342	0.124634	0.0961747	-0.272269	-0.272269			H	19	0.0601967	0.0893633	0.0804576	0	0	0.00729166	0
H	20	Sample X188	13137	13540	12954					H	20	0.108388	0.123023	0.101814	-0.272269	-0.272269			H	20	-0.0566818	-0.0511749	-0.0418402	0	0	0.00137672	0
H	21	Sample X189	12558	12715	12148					H	21	0.087741	0.0932961	0.0733842	-0.272269	-0.272269			H	21	0.0524035	0.0580253	0.0576671	0	0	0.00140545	0
H	22	Sample X190	14584	14799	14388					H	22	0.161982	0.170199	0.15455	-0.272269	-0.272269			H	22	-0.00308768	-0.00399894	0.0108954	0	0	-0.000227815	0
H	23	Sample X191	11031	11029	10437					H	23	0.0353375	0.0352708	0.0157171	-0.272269	-0.272269			H	23	0	0	0	0	0	0	0
H	24	Sample X192	14665	14903	14098					H	24	0.16507	0.174198	0.143655	-0.272269	-0.272269			H	24	0	0	0	0	0	0	0
I	1	Sample X193	12247	12740	12966					I	1	0.0768311	0.0941836	0.102244	-0.272269	-0.272269			I	1	0.0146071	0.0246495	0.0571081	0	0	0.00251059	0
I	2	Sample X194	17235	18670	18818					I	2	0.268256	0.330645	0.337291	-0.272269	-0.272269			I	2	0.216111	0.264429	0.298476	0	0	0.0120794	0
I	3	Sample X195	8848	8797	8785					I	3	-0.034799	-0.0363747	-0.036745	-0.272269	-0.272269			I	3	-0.097023	-0.105909	-0.0818811	0	0	-0.00222145	0
I	4	Sample X196	13448	13856	13969					I	4	0.119663	0.134654	0.138846	-0.272269	-0.272269			I	4	0.0675177	0.0684367	0.100031	0	0	0.000229752	0
I	5	Sample X197	7309	7384	7197					I	5	-0.0811616	-0.0789577	-0.0844425	-0.272269	-0.272269			I	5	-0.143386	-0.148492	-0.129579	0	0	-0.00127656	0
I	6	Sample X198	12435	12870	12803					I	6	0.0834113	0.098812	0.0964238	-0.272269	-0.272269			I	6	0.0312665	0.0325951	0.0576081	0	0	0.000332151	0
I	7	Sample X199	10205	10030	9871					I	7	0.00816531	0.00250964	-0.00259891	-0.272269	-0.272269			I	7	-0.0540587	-0.0670245	-0.047735	0	0	-0.00324146	0
I	8	Sample X200	11764	11686	12352					I	8	0.060131	0.0574614	0.0805007	-0.272269	-0.272269			I	8	0.00798617	-0.00875547	0.041685	0	0	-0.00418541	0
I	9	Sample X201	11028	11320	10778					I	9	0.0352374	0.0450349	0.02693	-0.272269	-0.272269			I	9	-0.0269866	-0.0244992	-0.0182061	0	0	0.000621841	0
I	10	Sample X202	11948	12213	11990					I	10	0.0664584	0.0756459	0.0679086	-0.272269	-0.272269			I	10	0.0143136	0.00942901	0.0290929	0	0	-0.00122114	0
I	11	Sample X203	12137	12456	11475					I	11	0.0730019	0.0841492	0.0502775	-0.272269	-0.272269			I	11	0.0107779	0.014615	0.00514141	0	0	0.000959272	0
I	12	Sample X204	12441	12919	12259					I	12	0.0836221	0.100562	0.0772498	-0.272269	-0.272269			I	12	0.0314772	0.0343454	0.0384341	0	0	0.000717042	0
I	13	Sample X205	11206	11414	10553					I	13	0.0411977	0.0482108	0.0195162	-0.272269	-0.272269			I	13	-0.0210263	-0.0213233	-0.0256199	0	0	-7.4248e-05	0
I	14	Sample X206	12376	12569	12273					I	14	0.0813414	0.0881292	0.0777385	-0.272269	-0.272269			I	14	0.0291966	0.0219123	0.0389228	0	0	-0.00182106	0
I	15	Sample X207	11181	11227	11322					I	15	0.0403582	0.0419033	0.0451024	-0.272269	-0.272269			I	15	-0.0218657	-0.0276308	-3.37321e-05	0	0	-0.00144126	0
I	16	Sample X208	11555	11708	11843					I	16	0.0529948	0.0582136	0.0628425	-0.272269	-0.272269			I	16	0.000850007	-0.00800328	0.0240268	0	0	-0.00221332	0
I	17	Sample X209	12589	12856	12882					I	17	0.0888354	0.0983125	0.0992404	-0.272269	-0.272269			I	17	0.0266114	0.0287784	0.0541043	0	0	0.000541748	0
I	18	Sample X210	11897	11590	11456					I	18	0.0647004	0.0541861	0.0496333	-0.272269	-0.272269			I	18	0.0125555	-0.0120308	0.0108176	0	0	-0.00614658	0
I	19	Sample X211	9938	9897	10041					I	19	-0.000449721	-0.00176549	0.00286411	-0.272269	-0.272269			I	19	-0.0626737	-0.0712996	-0.042272	0	0	-0.00215648	0
I	20	Sample X212	12301	12389	12120					I	20	0.0787166	0.0817971	0.0724115	-0.272269	-0.272269			I	20	0.0265717	0.0155802	0.0335958	0	0	-0.00274789	0
I	21	Sample X213	10988	10860	10330					I	21	0.0339032	0.0296467	0.0122265	-0.272269	-0.272269			I	21	-0.0283208	-0.0398875	-0.0329096	0	0	-0.00289168	0
I	22	Sample X214	11982	11983	12044					I	22	0.0676322	0.0676668	0.0697765	-0.272269	-0.272269			I	22	0.0154874	0.00144986	0.0309608	0	0	-0.00350938	0
I	23	Sample X215	11825	12037	11323					I	23	0.062224	0.0695341	0.0451361	-0.272269	-0.272269			I	23	0	0	0	0	0	0	0
I	24	Sample X216	11530	11941	11135					I	24	0.0521448	0.0662169	0.0388157	-0.272269	-0.272269			I	24	0	0	0	0	0	0	0
J	1	Sample X217	38643	40804	41658					J	1	1.85459	2.15879	2.29331	-0.272269	-0.272269			J	1	1.74624	2.04397	2.18895	0	0	0.0744323	0
J	2	Sample X218	38184	43902	46420					J	2	1.79585	2.69419	3.2481	-0.272269	-0.272269			J	2	1.66674	2.56016	3.13769	0	0	0.223357	0
J	3	Sample X219	36752	39979	41431					J	3	1.62405	2.03692	2.25668	-0.272269	-0.272269			J	3	1.5157	1.92209	2.15232	0	0	0.101597	0
J	4	Sample X220	39982	49147	53175					J	4	2.03735	4.02422	5.73076	-0.272269	-0.272269			J	4	1.90823	3.8902	5.62035	0	0	0.495492	0
J	5	Sample X221	27962	32701	34652					J	5	0.845646	1.21575	1.39963	-0.272269	-0.272269			J	5	0.737294	1.10092	1.29527	0	0	0.0909071	0
J	6	Sample X222	33730	43601	47426					J	6	1.31004	2.63595	3.50924	-0.272269	-0.272269			J	6	1.18093	2.50193	3.39883	0	0	0.33025	0
J	7	Sample X223	27964	34104	35809					J	7	0.845783	1.34578	1.51954	-0.272269	-0.272269			J	7	0.737431	1.23095	1.41518	0	0	0.12338	0
J	8	Sample X224	32547	44069	49195					J	8	1.20212	2.72716	4.04001	-0.272269	-0.272269			J	8	1.073	2.59313	3.9296	0	0	0.380032	0
J	9	Sample X225	21284	26002	27824					J	9	0.454361	0.717587	0.83621	-0.272269	-0.272269			J	9	0.346009	0.602762	0.731851	0	0	0.0641884	0
J	10	Sample X226	27139	36644	40288					J	10	0.790341	1.61176	2.08168	-0.272269	-0.272269			J	10	0.661225	1.47773	1.97127	0	0	0.204126	0
J	11	Sample X227	19235	23504	25053					J	11	0.356239	0.571106	0.659883	-0.272269	-0.272269			J	11	0.247887	0.456281	0.555524	0	0	0.0520985	0
J	12	Sample X228	23072	31955	35293					J	12	0.547463	1.15085	1.46498	-0.272269	-0.272269			J	12	0.418348	1.01682	1.35457	0	0	0.149619	0
J	13	Sample X229	16055	19719	21156					J	13	0.219586	0.378649	0.447974	-0.272269	-0.272269			J	13	0.111234	0.263824	0.343615	0	0	0.0381476	0
J	14	Sample X230	20906	27410	31261					J	14	0.435603	0.808298	1.09291	-0.272269	-0.272269			J	14	0.306487	0.674274	0.982498	0	0	0.0919465	0
J	15	Sample X231	14735	17442	18447					J	15	0.167746	0.277032	0.320708	-0.272269	-0.272269			J	15	0.0593939	0.162207	0.216348	0	0	0.0257034	0
J	16	Sample X232	16843	20960	23101					J	16	0.251833	0.438264	0.549036	-0.272269	-0.272269			J	16	0.122718	0.304239	0.438627	0	0	0.0453804	0
J	17	Sample X233	13402	14953	15132					J	17	0.117987	0.176126	0.18306	-0.272269	-0.272269			J	17	0.00963468	0.0613011	0.0787001	0	0	0.0129166	0
J	18	Sample X234	16806	20124	21550					J	18	0.250296	0.397757	0.467748	-0.272269	-0.272269			J	18	0.121181	0.263733	0.357339	0	0	0.035638	0
J	19	Sample X235	14592	15675	15589					J	19	0.162287	0.204389	0.200981	-0.272269	-0.272269			J	19	0.0539347	0.0895639	0.0966212	0	0	0.0089073	0
J	20	Sample X236	14516	16404	17096					J	20	0.159397	0.233744	0.262403	-0.272269	-0.272269			J	20	0.0302819	0.0997197	0.151994	0	0	0.0173595	0
J	21	Sample X237	14460	14886	14519					J	21	0.157274	0.173543	0.159511	-0.272269	-0.272269			J	21	0.0489218	0.0587181	0.0551517	0	0	0.00244907	0
J	22	Sample X238	13857	15128	15776					J	22	0.134691	0.182904	0.208406	-0.272269	-0.272269			J	22	0.00557514	0.0488798	0.0979975	0	0	0.0108262	0
J	23	Sample X239	13136	13315	13025					J	23	0.108352	0.114825	0.10436	-0.272269	-0.272269			J	23	0	0	0	0	0	0	0
J	24	Sample X240	13706	13839	13193					J	24	0.129116	0.134024	0.110409	-0.272269	-0.272269			J	24	0	0	0	0	0	0	0
K	1	Sample X241	25998	27661	27462					K	1	0.717339	0.825151	0.811772	-0.272269	-0.272269			K	1	0.661857	0.778698	0.762884	0	0	0.0292101	0
K	2	Sample X242	35129	43871	46624					K	2	1.44801	2.68812	3.29897	-0.272269	-0.272269			K	2	1.39644	2.63788	3.26019	0	0	0.310359	0
K	3	Sample X243	19658	20141	20255					K	3	0.375799	0.398567	0.404009	-0.272269	-0.272269			K	3	0.320318	0.352114	0.355121	0	0	0.00794897	0
K	4	Sample X244	34545	46028	50331					K	4	1.38897	3.15312	4.44026	-0.272269	-0.272269			K	4	1.3374	3.10288	4.40148	0	0	0.44137	0
K	5	Sample X245	16432	16696	16713					K	5	0.234888	0.245741	0.246444	-0.272269	-0.272269			K	5	0.179407	0.199288	0.197556	0	0	0.00497028	0
K	6	Sample X246	31192	42134	46976					K	6	1.08727	2.3723	3.38918	-0.272269	-0.272269			K	6	1.0357	2.32206	3.3504	0	0	0.321589	0
K	7	Sample X247	14082	14482	13748					K	7	0.143057	0.158108	0.130663	-0.272269	-0.272269			K	7	0.0875757	0.111655	0.0817751	0	0	0.00601979	0
K	8	Sample X248	27114	38209	42554					K	8	0.788696	1.799	2.44455	-0.272269	-0.272269			K	8	0.737129	1.74876	2.40577	0	0	0.252907	0
K	9	Sample X249	14228	14758	14594					K	9	0.148524	0.168627	0.162363	-0.272269	-0.272269			K	9	0.0930427	0.122174	0.113475	0	0	0.00728285	0
K	10	Sample X250	27246	39917	42833					K	10	0.797402	2.02806	2.49393	-0.272269	-0.272269			K	10	0.745834	1.97781	2.45515	0	0	0.307995	0
K	11	Sample X251	13633	13863	13637					K	11	0.126432	0.134913	0.126578	-0.272269	-0.272269			K	11	0.0709503	0.0884602	0.0776905	0	0	0.00437748	0
K	12	Sample X252	23549	33185	35192					K	12	0.573596	1.25938	1.45451	-0.272269	-0.272269			K	12	0.522028	1.20914	1.41572	0	0	0.171778	0
K	13	Sample X253	11481	11877	11484					K	13	0.050481	0.0640118	0.0505828	-0.272269	-0.272269			K	13	-0.00500021	0.0175592	0.00169491	0	0	0.00563986	0
K	14	Sample X254	18957	25186	26291					K	14	0.343571	0.667813	0.735694	-0.272269	-0.272269			K	14	0.292003	0.617569	0.696912	0	0	0.0813914	0
K	15	Sample X255	12318	12815	12680					K	15	0.0793109	0.0968511	0.0920549	-0.272269	-0.272269			K	15	0.0238296	0.0503985	0.043167	0	0	0.00664223	0
K	16	Sample X256	16319	19980	21122					K	16	0.230278	0.390926	0.446284	-0.272269	-0.272269			K	16	0.178711	0.340682	0.407502	0	0	0.0404929	0
K	17	Sample X257	12413	12595	12326					K	17	0.082639	0.0890473	0.0795907	-0.272269	-0.272269			K	17	0.0271577	0.0425947	0.0307028	0	0	0.00385925	0
K	18	Sample X258	13990	15724	16538					K	18	0.139628	0.206336	0.239232	-0.272269	-0.272269			K	18	0.0880602	0.156092	0.20045	0	0	0.017008	0
K	19	Sample X259	11664	11815	11797					K	19	0.0567098	0.0618806	0.0612627	-0.272269	-0.272269			K	19	0.00122859	0.015428	0.0123748	0	0	0.00354984	0
K	20	Sample X260	13409	14602	15211					K	20	0.118242	0.162667	0.186135	-0.272269	-0.272269			K	20	0.0666742	0.112424	0.147353	0	0	0.0114374	0
K	21	Sample X261	9495	9359	9378					K	21	-0.0145671	-0.0188576	-0.0182594	-0.272269	-0.272269			K	21	-0.0700484	-0.0653102	-0.0671473	0	0	0.00118455	0
K	22	Sample X262	13360	14430	14203					K	22	0.116459	0.156138	0.147586	-0.272269	-0.272269			K	22	0.0648918	0.105894	0.108804	0	0	0.0102506	0
K	23	Sample X263	11628	11362	11434					K	23	0.0554813	0.0464526	0.0488879	-0.272269	-0.272269			K	23	0	0	0	0	0	0	0
K	24	Sample X264	11513	11474	11134					K	24	0.0515673	0.0502436	0.0387822	-0.272269	-0.272269			K	24	0	0	0	0	0	0	0
L	1	Sample X265	33314	35244	36149					L	1	1.27123	1.45989	1.55648	-0.272269	-0.272269			L	1	1.15342	1.33441	1.43328	0	0	0.0452474	0
L	2	Sample X266	33513	37324	37225					L	2	1.28967	1.69069	1.67897	-0.272269	-0.272269			L	2	1.18693	1.58844	1.59458	0	0	0.100379	0
L	3	Sample X267	29314	31038	32531					L	3	0.941744	1.07476	1.20071	-0.272269	-0.272269			L	3	0.823939	0.949286	1.07751	0	0	0.0313368	0
L	4	Sample X268	43288	50619	48057					L	4	2.57696	4.55055	3.68719	-0.272269	-0.272269			L	4	2.47421	4.44831	3.6028	0	0	0.493524	1
L	5	Sample X269	26758	30452	30996					L	5	0.765504	1.02814	1.07137	-0.272269	-0.272269			L	5	0.647699	0.902664	0.948165	0	0	0.0637412	0
L	6	Sample X270	33253	41242	40049					L	6	1.26562	2.22667	2.04697	-0.272269	-0.272269			L	6	1.16287	2.12443	1.96257	0	0	0.240389	0
L	7	Sample X271	24030	27054	28317					L	7	0.600535	0.784759	0.870228	-0.272269	-0.272269			L	7	0.48273	0.659281	0.747023	0	0	0.0441378	0
L	8	Sample X272	26983	33171	32555					L	8	0.780114	1.2581	1.20282	-0.272269	-0.272269			L	8	0.677368	1.15586	1.11843	0	0	0.119623	0
L	9	Sample X273	17810	20482	21765					L	9	0.292818	0.414925	0.478683	-0.272269	-0.272269			L	9	0.175013	0.289448	0.355477	0	0	0.0286086	0
L	10	Sample X274	20975	25925	25197					L	10	0.439004	0.712806	0.668471	-0.272269	-0.272269			L	10	0.336258	0.610562	0.584076	0	0	0.0685759	0
L	11	Sample X275	16072	18705	19914					L	11	0.220271	0.332213	0.387808	-0.272269	-0.272269			L	11	0.102466	0.206736	0.264603	0	0	0.0260674	0
L	12	Sample X276	17709	20585	20964					L	12	0.288462	0.419914	0.438461	-0.272269	-0.272269			L	12	0.185716	0.317669	0.354066	0	0	0.0329883	0
L	13	Sample X277	15623	18021	19062					L	13	0.202327	0.301976	0.348338	-0.272269	-0.272269			L	13	0.0845221	0.176498	0.225132	0	0	0.0229941	0
L	14	Sample X278	14512	16312	16747					L	14	0.159246	0.229993	0.247851	-0.272269	-0.272269			L	14	0.0564998	0.127749	0.163455	0	0	0.0178122	0
L	15	Sample X279	14040	15549	16430					L	15	0.14149	0.199399	0.234807	-0.272269	-0.272269			L	15	0.0236852	0.073922	0.111601	0	0	0.0125592	0
L	16	Sample X280	12433	13648	13892					L	16	0.0833411	0.126982	0.135987	-0.272269	-0.272269			L	16	-0.0194046	0.0247383	0.0515922	0	0	0.0110357	0
L	17	Sample X281	13310	14459	14905					L	17	0.114644	0.157236	0.174275	-0.272269	-0.272269			L	17	-0.00316111	0.0317585	0.051069	0	0	0.0087299	0
L	18	Sample X282	13179	13827	14326					L	18	0.109903	0.13358	0.152211	-0.272269	-0.272269			L	18	0.00715731	0.0313363	0.0678154	0	0	0.00604475	0
L	19	Sample X283	13724	14669	14324					L	19	0.129778	0.165223	0.152135	-0.272269	-0.272269			L	19	0.0119737	0.0397451	0.0289294	0	0	0.00694285	0
L	20	Sample X284	11746	11929	12026					L	20	0.0595143	0.0658031	0.0691535	-0.272269	-0.272269			L	20	-0.0432314	-0.0364411	-0.0152418	0	0	0.00169758	0
L	21	Sample X285	13873	14211	14382					L	21	0.135283	0.147886	0.154323	-0.272269	-0.272269			L	21	0.0174786	0.0224085	0.0311176	0	0	0.00123248	0
L	22	Sample X286	13273	13517	13023					L	22	0.113302	0.122182	0.104288	-0.272269	-0.272269			L	22	0.0105566	0.0199375	0.0198926	0	0	0.00234524	0
L	23	Sample X287	13397	13607	13545					L	23	0.117805	0.125477	0.123206	-0.272269	-0.272269			L	23	0	0	0	0	0	0	0
L	24	Sample X288	12980	12966	12463					L	24	0.102746	0.102244	0.0843952	-0.272269	-0.272269			L	24	0	0	0	0	0	0	0
M	1	Sample X289	27405	27009	27266					M	1	0.807964	0.781813	0.798726	-0.272269	-0.272269			M	1	0.743953	0.72977	0.747328	0	0	-0.00354562	0
M	2	Sample X290	43295	47715	48001					M	2	2.57826	3.5893	3.67092	-0.272269	-0.272269			M	2	2.53218	3.54024	3.63838	0	0	0.252014	0
M	3	Sample X291	18946	18002	18794					M	3	0.343072	0.301148	0.336211	-0.272269	-0.272269			M	3	0.279061	0.249105	0.284814	0	0	-0.00748886	0
M	4	Sample X292	37932	41591	43277					M	4	1.76439	2.28243	2.57492	-0.272269	-0.272269			M	4	1.71831	2.23337	2.54238	0	0	0.128766	0
M	5	Sample X293	16472	15954	16374					M	5	0.236525	0.215525	0.232519	-0.272269	-0.272269			M	5	0.172514	0.163482	0.181122	0	0	-0.002258	0
M	6	Sample X294	29882	33705	35726					M	6	0.984204	1.30768	1.51064	-0.272269	-0.272269			M	6	0.938123	1.25862	1.4781	0	0	0.0801252	0
M	7	Sample X295	13337	13095	12904					M	7	0.115624	0.106875	0.100026	-0.272269	-0.272269			M	7	0.0516117	0.0548325	0.0486287	0	0	0.000805213	0
M	8	Sample X296	22431	26002	27596					M	8	0.513227	0.717587	0.820766	-0.272269	-0.272269			M	8	0.467146	0.66853	0.788228	0	0	0.0503461	0
M	9	Sample X297	12112	12076	12176					M	9	0.0721338	0.0708851	0.0743578	-0.272269	-0.272269			M	9	0.00812195	0.0188422	0.0229603	0	0	0.00268006	0
M	10	Sample X298	17839	20676	21136					M	10	0.294072	0.424339	0.44698	-0.272269	-0.272269			M	10	0.247991	0.375282	0.414442	0	0	0.0318228	0
M	11	Sample X299	11650	11588	11731					M	11	0.0562319	0.054118	0.0590007	-0.272269	-0.272269			M	11	-0.00777998	0.00207514	0.00760319	0	0	0.00246378	0
M	12	Sample X300	15156	17449	17770					M	12	0.183993	0.27733	0.291091	-0.272269	-0.272269			M	12	0.137912	0.228273	0.258553	0	0	0.0225903	0
M	13	Sample X301	11501	11615	11880					M	13	0.0511598	0.055038	0.0641151	-0.272269	-0.272269			M	13	-0.0128521	0.0029951	0.0127176	0	0	0.00396179	0
M	14	Sample X302	13726	15275	15597					M	14	0.129852	0.188633	0.201297	-0.272269	-0.272269			M	14	0.083771	0.139576	0.16876	0	0	0.0139513	0
M	15	Sample X303	10002	10070	10168					M	15	0.00160795	0.0037993	0.00696664	-0.272269	-0.272269			M	15	-0.0624039	-0.0482436	-0.0444308	0	0	0.00354008	0
M	16	Sample X304	12087	12872	13189					M	16	0.0712665	0.0988834	0.110264	-0.272269	-0.272269			M	16	0.0251854	0.0498261	0.0777264	0	0	0.00616019	0
M	17	Sample X305	10204	10319	10071					M	17	0.0081329	0.0118684	0.00383156	-0.272269	-0.272269			M	17	-0.0558789	-0.0401745	-0.0475659	0	0	0.00392611	0
M	18	Sample X306	12760	12988	13188					M	18	0.0948942	0.103032	0.110228	-0.272269	-0.272269			M	18	0.0488132	0.0539752	0.0776903	0	0	0.0012905	0
M	19	Sample X307	9961	10120	9728					M	19	0.000289223	0.00541392	-0.00716916	-0.272269	-0.272269			M	19	-0.0637226	-0.046629	-0.0585666	0	0	0.00427342	0
M	20	Sample X308	12321	12381	12383					M	20	0.0794158	0.0815166	0.0815867	-0.272269	-0.272269			M	20	0.0333347	0.0324594	0.0490491	0	0	-0.000218837	0
M	21	Sample X309	11951	12046	11771					M	21	0.0665619	0.0698457	0.0603709	-0.272269	-0.272269			M	21	0.00255007	0.0178028	0.00897348	0	0	0.00381319	0
M	22	Sample X310	12003	12120	12103					M	22	0.068358	0.0724115	0.0718215	-0.272269	-0.272269			M	22	0.0222769	0.0233542	0.0392838	0	0	0.000269345	0
M	23	Sample X311	11877	11527	11508					M	23	0.0640118	0.0520429	0.0513975	-0.272269	-0.272269			M	23	0	0	0	0	0	0	0
M	24	Sample X312	11351	11439	10947					M	24	0.0460811	0.0490573	0.0325377	-0.272269	-0.272269			M	24	0	0	0	0	0	0	0
N	1	Sample X313	15453	15443	15377					N	1	0.195614	0.195221	0.192628	-0.272269	-0.272269			N	1	0.140576	0.149207	0.146108	0	0	0.00215774	0
N	2	Sample X314	18893	19332	19718					N	2	0.340675	0.360694	0.378602	-0.272269	-0.272269			N	2	0.190309	0.223073	0.242689	0	0	0.00819101	0
N	3	Sample X315	12851	12784	12636					N	3	0.0981342	0.0957477	0.0904969	-0.272269	-0.272269			N	3	0.0430962	0.0497341	0.0439767	0	0	0.00165948	0
N	4	Sample X316	15995	16494	16189					N	4	0.217171	0.237427	0.224999	-0.272269	-0.272269			N	4	0.0668056	0.0998069	0.0890857	0	0	0.00825031	0
N	5	Sample X317	11771	11613	11162					N	5	0.0603709	0.0549698	0.0397208	-0.272269	-0.272269			N	5	0.00533296	0.00895625	-0.00679937	0	0	0.000905822	0
N	6	Sample X318	14825	15329	14351					N	6	0.171197	0.190746	0.153153	-0.272269	-0.272269			N	6	0.0208315	0.053126	0.01724	0	0	0.00807362	0
N	7	Sample X319	11664	11595	10651					N	7	0.0567098	0.0543564	0.0227381	-0.272269	-0.272269			N	7	0.00167186	0.00834288	-0.0237821	0	0	0.00166776	0
N	8	Sample X320	13363	13872	12601					N	8	0.116568	0.135246	0.0892593	-0.272269	-0.272269			N	8	-0.0337975	-0.00237388	-0.046654	0	0	0.0078559	0
N	9	Sample X321	10655	10686	10542					N	9	0.0228698	0.0238914	0.0191553	-0.272269	-0.272269			N	9	-0.0321682	-0.0221221	-0.0273649	0	0	0.00251151	0
N	10	Sample X322	12481	13016	12016					N	10	0.0850283	0.104037	0.0688075	-0.272269	-0.272269			N	10	-0.0653373	-0.0335835	-0.0671058	0	0	0.00793846	0
N	11	Sample X323	10935	10852	10783					N	11	0.0321384	0.0293813	0.0270954	-0.272269	-0.272269			N	11	-0.0228996	-0.0166323	-0.0194248	0	0	0.00156683	0
N	12	Sample X324	12074	12488	11608					N	12	0.0708158	0.0852746	0.0547994	-0.272269	-0.272269			N	12	-0.0795498	-0.0523455	-0.0811139	0	0	0.00680108	0
N	13	Sample X325	10983	10827	10543					N	13	0.0337366	0.0285524	0.0191881	-0.272269	-0.272269			N	13	-0.0213014	-0.0174611	-0.0273321	0	0	0.000960061	0
N	14	Sample X326	12059	12392	12069					N	14	0.070296	0.0819023	0.0706425	-0.272269	-0.272269			N	14	-0.0800696	-0.0557178	-0.0652708	0	0	0.00608796	0
N	15	Sample X327	11488	11648	11341					N	15	0.0507185	0.0561636	0.0457435	-0.272269	-0.272269			N	15	-0.00431944	0.01015	-0.000776675	0	0	0.00361737	0
N	16	Sample X328	12200	12618	12226					N	16	0.0751931	0.0898602	0.0760989	-0.272269	-0.272269			N	16	-0.0751725	-0.0477599	-0.0598144	0	0	0.00685315	0
N	17	Sample X329	11265	11394	11100					N	17	0.0431816	0.0475342	0.0376437	-0.272269	-0.272269			N	17	-0.0118563	0.00152062	-0.00887645	0	0	0.00334424	0
N	18	Sample X330	12564	12639	12424					N	18	0.0879528	0.090603	0.0830251	-0.272269	-0.272269			N	18	-0.0624128	-0.0470171	-0.0528882	0	0	0.00384895	0
N	19	Sample X331	12499	12534	12180					N	19	0.0856617	0.0868947	0.074497	-0.272269	-0.272269			N	19	0.0306238	0.0408811	0.0279768	0	0	0.00256434	0
N	20	Sample X332	13661	13698	13539					N	20	0.12746	0.128821	0.122986	-0.272269	-0.272269			N	20	-0.0229054	-0.00879906	-0.012927	0	0	0.00352659	0
N	21	Sample X333	9660	9447	9428					N	21	-0.00933443	-0.0160837	-0.0166833	-0.272269	-0.272269			N	21	-0.0643724	-0.0620973	-0.0632035	0	0	0.000568788	0
N	22	Sample X334	13391	13155	13068					N	22	0.117586	0.109037	0.105904	-0.272269	-0.272269			N	22	-0.0327792	-0.028583	-0.030009	0	0	0.00104905	0
N	23	Sample X335	11615	11349	11364					N	23	0.055038	0.0460136	0.0465202	-0.272269	-0.272269			N	23	0	0	0	0	0	0	0
N	24	Sample X336	14277	13936	13890					N	24	0.150366	0.13762	0.135913	-0.272269	-0.272269			N	24	0	0	0	0	0	0	0
O	1	Sample X337	15614	15475	15258					O	1	0.20197	0.196481	0.187969	-0.272269	-0.272269			O	1	0.226507	0.223765	0.202157	0	0	-0.00068541	0
O	2	Sample X338	14898	15349	15376					O	2	0.174005	0.19153	0.192589	-0.272269	-0.272269			O	2	0.121554	0.144063	0.148666	0	0	0.00562718	0
O	3	Sample X339	12353	12357	12696					O	3	0.0805357	0.0806757	0.0926221	-0.272269	-0.272269			O	3	0.105072	0.10796	0.10681	0	0	0.000722054	0
O	4	Sample X340	13680	14220	13200					O	4	0.128159	0.148224	0.110661	-0.272269	-0.272269			O	4	0.075708	0.100757	0.0667389	0	0	0.00626228	0
O	5	Sample X341	11622	11647	11592					O	5	0.0552766	0.0561295	0.0542543	-0.272269	-0.272269			O	5	0.079813	0.083414	0.0684418	0	0	0.000900244	0
O	6	Sample X342	12391	12678	12256					O	6	0.0818672	0.0919841	0.0771451	-0.272269	-0.272269			O	6	0.0294165	0.0445175	0.0332226	0	0	0.00377526	0
O	7	Sample X343	10705	10311	10443					O	7	0.0245181	0.011608	0.0159132	-0.272269	-0.272269			O	7	0.0490545	0.0388925	0.0301008	0	0	-0.0025405	0
O	8	Sample X344	11373	12120	11516					O	8	0.0468243	0.0724115	0.0516692	-0.272269	-0.272269			O	8	-0.00562649	0.024945	0.00774665	0	0	0.00764286	0
O	9	Sample X345	10737	10817	11057					O	9	0.0255746	0.0282211	0.0362059	-0.272269	-0.272269			O	9	0.050111	0.0555056	0.0503934	0	0	0.00134865	0
O	10	Sample X346	11248	11692	11386					O	10	0.0426096	0.0576665	0.0472637	-0.272269	-0.272269			O	10	-0.00984119	0.0102	0.00334116	0	0	0.00501029	0
O	11	Sample X347	10169	9963	10162					O	11	0.00699901	0.000353507	0.00677241	-0.272269	-0.272269			O	11	0.0315354	0.027638	0.02096	0	0	-0.000974342	0
O	12	Sample X348	11289	11685	11400					O	12	0.0439899	0.0574273	0.0477371	-0.272269	-0.272269			O	12	-0.00846085	0.00996071	0.00381461	0	0	0.00460539	0
O	13	Sample X349	11106	11020	10980					O	13	0.0378445	0.0349704	0.0336366	-0.272269	-0.272269			O	13	0.0623809	0.0622549	0.0478242	0	0	-3.14922e-05	0
O	14	Sample X350	10769	10785	10662					O	14	0.0266323	0.0271616	0.0231004	-0.272269	-0.272269			O	14	-0.0258184	-0.020305	-0.0208221	0	0	0.00137837	0
O	15	Sample X351	9687	9695	9757					O	15	-0.0084753	-0.00822059	-0.00624417	-0.272269	-0.272269			O	15	0.0160611	0.0190639	0.00794338	0	0	0.000750713	0
O	16	Sample X352	10540	10681	10636					O	16	0.0190897	0.0237266	0.0222442	-0.272269	-0.272269			O	16	-0.0333611	-0.02374	-0.0216783	0	0	0.00240527	0
O	17	Sample X353	10043	9998	9998					O	17	0.00292858	0.00147921	0.00147921	-0.272269	-0.272269			O	17	0.0274649	0.0287637	0.0156668	0	0	0.000324693	0
O	18	Sample X354	11464	11633	11355					O	18	0.0499045	0.0556518	0.0462162	-0.272269	-0.272269			O	18	-0.00254625	0.00818524	0.00229366	0	0	0.00268287	0
O	19	Sample X355	7470	7408	7507					O	19	-0.0764238	-0.0782513	-0.0753313	-0.272269	-0.272269			O	19	-0.0518874	-0.0509668	-0.0611437	0	0	0.000230146	0
O	20	Sample X356	11467	11539	11434					O	20	0.0500062	0.0524507	0.0488879	-0.272269	-0.272269			O	20	-0.00244454	0.0049842	0.0049654	0	0	0.00185718	0
O	21	Sample X357	9249	9115	9214					O	21	-0.022313	-0.0265046	-0.0234097	-0.272269	-0.272269			O	21	0.00222335	0.000779872	-0.00922217	0	0	-0.000360871	0
O	22	Sample X358	11688	11619	11447					O	22	0.0575298	0.0551744	0.0493283	-0.272269	-0.272269			O	22	0.00507905	0.0077078	0.00540579	0	0	0.00065719	0
O	23	Sample X359	9178	9090	9507					O	23	-0.0245364	-0.0272845	-0.0141876	-0.272269	-0.272269			O	23	0	0	0	0	0	0	0
O	24	Sample X360	11539	11392	11287					O	24	0.0524507	0.0474666	0.0439225	-0.272269	-0.272269			O	24	0	0	0	0	0	0	0
P	1	Sample X361	5348	5204	5064					P	1								P	1	0	0	0	0	0		0			0	0
P	2	Sample X362	5956	5857	5682					P	2								P	2	0	0	0	0	0
P	3	Sample X363	5843	5663	5385					P	3								P	3	0	0	0	0	0		0			0	0
P	4	Sample X364	6090	5725	5659					P	4								P	4	0	0	0	0	0
P	5	Sample X365	4092	3960	4140					P	5								P	5	0	0	0	0	0		0			0	0
P	6	Sample X366	6036	5985	5853					P	6								P	6	0	0	0	0	0		0
P	7	Sample X367	4943	5031	5170					P	7								P	7	0	0	0	0	0		0			0	0
P	8	Sample X368	6288	5900	6231					P	8								P	8	0	0	0	0	0
P	9	Sample X369	4214	4078	4007					P	9								P	9	0	0	0	0	0		0			0	0
P	10	Sample X370	6016	6017	5763					P	10								P	10	0	0	0	0	0
P	11	Sample X371	6295	6105	6232					P	11								P	11	0	0	0	0	0		0			0	0
P	12	Sample X372	5499	5022	5511					P	12								P	12	0	0	0	0	0
P	13	Sample X373	5588	5357	5340					P	13								P	13	0	0	0	0	0		0			0	0
P	14	Sample X374	6085	5957	5812					P	14								P	14	0	0	0	0	0
P	15	Sample X375	6307	6365	6223					P	15								P	15	0	0	0	0	0		0			0	0
P	16	Sample X376	5728	5620	5387					P	16								P	16	0	0	0	0	0
P	17	Sample X377	6275	6358	6190					P	17								P	17	0	0	0	0	0
P	18	Sample X378	5931	5639	5830					P	18								P	18	0	0	0	0	0
P	19	Sample X379	4864	4863	4380					P	19								P	19	0	0	0	0	0
P	20	Sample X380	6758	6649	6580					P	20								P	20	0	0	0	0	0
P	21	Sample X381	6607	6507	6342					P	21								P	21	0	0	0	0	0
P	22	Sample X382	7533	7460	7207					P	22								P	22	0	0	0	0	0
P	23	Sample X383	6718	6639	6465					P	23								P	23	0	0	0	0	0
P	24	Sample X384	7125	6806	6654					P	24								P	24	0	0	0	0	0
[truncated: 12 more columns]
