# Supplementary material for: PDZ-directed substrate recruitment is the primary determinant of specific 4E-BP1 dephosphorylation by PP1-Neurabin
Source: eLife journal article supplement (doi:10.7554/elife.103403), 2024-11-20
Supplement: fig5-data1 [file replicate4.xlsx]

## Sheet: All Cycles
Well Row	Well Col	Content	Raw Data (425-10/460-20)	Raw Data (425-10/460-20)	Raw Data (425-10/460-20)				convert to phosphate	Well Row	Well Col	Raw Data (425-10/460-20)	Raw Data (425-10/460-20)	Raw Data (425-10/460-20)				normalize to the lasst column	Well Row	Well Col	Raw Data (425-10/460-20)	Raw Data (425-10/460-20)	Raw Data (425-10/460-20)								PP1-Neb 1 nM																PP1-Ph1 2.5 nM
		Time [s]	0	240	480							0	4	8							0	4	8								V1	V2	V3	V4	V5	V6	V7	P1	P2	P3	P4	P5	P6	P7	P8		V1	V2	V3
A	1	Sample X1	32392	40644	44652					A	1	1.18853	2.13456	2.84612	-0.272269	-0.272269			A	1	1.09157	2.05717	2.78283			0.2414	0			400	0.2414	0.0197335	0.0185681	0.0180682	0.0342859	0.285822	0.0721986	0.0348519	0.00676416	0.0550459	0.0177165	0.0502015	-0.000254058	-0.00557076	0.00776649		0.342714	0.0663047	0.0714166
A	2	Sample X2	40903	47524	49240					A	2	2.17394	3.53612	4.05489	-0.272269	-0.272269			A	2	1.98146	3.35232	3.92989			0.342714	0			200	0.294823	0.0234527	0.0203061	0.0171207	0.0302887	0.170237	0.0819335	0.0385809	0.000734556	0.0997108	0.0104336	0.0832849	-0.0270556	-0.00281205	0.00751253		0.238334	0.0343072	0.053871
A	3	Sample X3	33053	42338	46267					A	3	1.24736	2.40709	3.2106	-0.272269	-0.272269			A	3	1.1504	2.3297	3.14731			0.294823	0			100	0.186304	0.0211706	0.0162813	0.0151073	0.0266826	0.195878	0.0565331	0.0323914	0.00268	0.0706014	0.0154499	0.062693	0.0109621	-0.00237345	0.00267414		0.224406	0.0245655	0.0378567
A	4	Sample X4	36470	43070	44927					A	4	1.59212	2.53679	2.90442	-0.272269	-0.272269			A	4	1.39965	2.35299	2.77942			0.238334	0			50	0.231804	0.022613	0.0166164	0.0121932	0.0317367	0.155054	0.0849928	0.025809	-0.00164029	0.0837528	-0.000396889	0.0506417	-0.00324119	-0.00656496	0.00631142		0.160652	0.0163364	0.0228593
A	5	Sample X5	27732	36141	40624					A	5	0.829957	1.55561	2.13155	-0.272269	-0.272269			A	5	0.732999	1.47822	2.06826			0.186304	0			25	0.170488	0.0203927	0.0157437	0.00921112	0.0269871	0.133451	0.0648403	0.0263241	0.000495487	0.0604537	-0.00226298	0.0347453	0.00343046	-0.00351136	0.00207325		0.0876608	0.0119154	0.0163354
A	6	Sample X6	32619	40395	43217					A	6	1.20848	2.09743	2.5638	-0.272269	-0.272269			A	6	1.01601	1.91363	2.43879			0.224406	0			12.5	0.143264	0.0153859	0.0124181	0.00841299	0.0235162	0.112053	0.0647525	0.0165605	0.000864747	0.0506962	-0.00927724	0.0288199	0.00436123	-0.00580315	0.00392141		0.0501956	0.0105815	0.0102435
A	7	Sample X7	29683	38813	42951					A	7	0.969181	1.87683	2.51516	-0.272269	-0.272269			A	7	0.872223	1.79944	2.45187			0.231804	0			6.25	0.0993702	0.00858855	0.0113921	0.00615084	0.0180873	0.074633	0.0462403	0.0136733	-0.00145899	0.0345207	-0.00202777	0.022746	-0.000541474	-0.00336921	0.00243593		0.0274005	0.00695619	0.004849
A	8	Sample X8	27725	35278	38725					A	8	0.829482	1.46342	1.86528	-0.272269	-0.272269			A	8	0.637011	1.27962	1.74028			0.160652	0			3.125	0.0797467	-0.00451438	0.00672756	0.00219249	0.0114353	0.0523028	0.0327365	0.0104958	0.00021777	0.0198516	-0.00116838	0.013423	0.000336406	-0.00116482	0.00171144		0.0198721	0.00578595	0.00390532
A	9	Sample X9	26238	34603	39198					A	9	0.732355	1.39474	1.9282	-0.272269	-0.272269			A	9	0.635397	1.31735	1.86491			0.170488	0			1.5625	0.0459688	-0.00070778	0.00361102	0.00167105	0.00809206	0.0299833	0.0264701	0.00706379	-0.000770809	0.0110332	-0.00256899	0.00736728	-0.00111518	-0.0047862	0.000380448		0.00618698	0.00675607	0.0035933
A	10	Sample X10	21033	27040	30563					A	10	0.441871	0.783841	1.03686	-0.272269	-0.272269			A	10	0.2494	0.600043	0.911856			0.0876608	0			0.78125	0.0253274	-0.00261309	0.00271666	0.00105227	0.0028288	0.0192927	0.0153045	0.00185917	0.0001283	0.000392426	-0.00720442	0.00141954	-0.00120947	-0.00324533	0.000222499		-0.000739253	0.00493935	0.00313684
A	11	Sample X11	24293	32167	37629					A	11	0.615521	1.16901	1.72728	-0.272269	-0.272269			A	11	0.518563	1.09162	1.66399			0.143264	0			0.390625	0.0170394	-0.00287069	0.00163556	0.000333529	-0.000176362	0.0109725	0.00799139	0.00125619	0.000493661	0.000248832	-0.00190509	0.00342948	-0.00145183	-0.00274026	0.00054062		0.00214918	0.00137831	0.00218332
A	12	Sample X12	18973	22867	24282					A	12	0.344296	0.536406	0.61489	-0.272269	-0.272269			A	12	0.151825	0.352607	0.48989			0.0501956	0			0	0	0	0	0	0	0	0	0	0	0	0	0	0	0	0		0	0	0
A	13	Sample X13	21220	27719	30880					A	13	0.451163	0.829075	1.06204	-0.272269	-0.272269			A	13	0.354205	0.751686	0.998754			0.0993702	0
A	14	Sample X14	16084	18469	20311					A	14	0.220755	0.321684	0.406692	-0.272269	-0.272269			A	14	0.028284	0.137886	0.281691			0.0274005	0				3	27	51	75	99	123	147	171	195	219	243	267	291	315	339		3	27	51
A	15	Sample X15	19203	24957	28848					A	15	0.354773	0.654191	0.907852	-0.272269	-0.272269			A	15	0.257815	0.576802	0.844563			0.0797467	0				PP1-Neb 1 nM																PP1-Ph1 2.5 nM
A	16	Sample X16	13947	15787	17148					A	16	0.138029	0.208845	0.264589	-0.272269	-0.272269			A	16	-0.0544422	0.0250461	0.139588			0.0198721	0				V1	V2	V3	V4	V5	V6	V7	P1	P2	P3	P4	P5	P6	P7	P8		V1	V2	V3
A	17	Sample X17	17985	21490	23977					A	17	0.300408	0.464714	0.597537	-0.272269	-0.272269			A	17	0.20345	0.387325	0.534247			0.0459688	0		0	400	0.2414	0.0197335	0.0185681	0.0180682	0.0342859	0.285822	0.0721986	0.0348519	0.00676416	0.0550459	0.0177165	0.0502015	-0.000254058	-0.00557076	0.00776649		0.342714	0.0663047	0.0714166
A	18	Sample X18	15662	16064	16636					A	18	0.203873	0.219948	0.243264	-0.272269	-0.272269			A	18	0.0114021	0.03615	0.118264			0.00618698	0		2	200	0.294823	0.0234527	0.0203061	0.0171207	0.0302887	0.170237	0.0819335	0.0385809	0.000734556	0.0997108	0.0104336	0.0832849	-0.0270556	-0.00281205	0.00751253		0.238334	0.0343072	0.053871
A	19	Sample X19	15685	17664	19016					A	19	0.204786	0.286527	0.346247	-0.272269	-0.272269			A	19	0.107828	0.209138	0.282957			0.0253274	0		4	100	0.186304	0.0211706	0.0162813	0.0151073	0.0266826	0.195878	0.0565331	0.0323914	0.00268	0.0706014	0.0154499	0.062693	0.0109621	-0.00237345	0.00267414		0.224406	0.0245655	0.0378567
A	20	Sample X20	15126	14825	15270					A	20	0.182827	0.171197	0.188438	-0.272269	-0.272269			A	20	-0.00964436	-0.0126014	0.0634373			-0.000739253	0		6	50	0.231804	0.022613	0.0166164	0.0121932	0.0317367	0.155054	0.0849928	0.025809	-0.00164029	0.0837528	-0.000396889	0.0506417	-0.00324119	-0.00656496	0.00631142		0.160652	0.0163364	0.0228593
A	21	Sample X21	14739	15978	16439					A	21	0.167899	0.216488	0.235175	-0.272269	-0.272269			A	21	0.070941	0.139099	0.171885			0.0170394	0		8	25	0.170488	0.0203927	0.0157437	0.00921112	0.0269871	0.133451	0.0648403	0.0263241	0.000495487	0.0604537	-0.00226298	0.0347453	0.00343046	-0.00351136	0.00207325		0.0876608	0.0119154	0.0163354
A	22	Sample X22	14426	14424	14131					A	22	0.155987	0.155911	0.144888	-0.272269	-0.272269			A	22	-0.0364842	-0.0278875	0.0198878			0.00214918	0		10	12.5	0.143264	0.0153859	0.0124181	0.00841299	0.0235162	0.112053	0.0647525	0.0165605	0.000864747	0.0506962	-0.00927724	0.0288199	0.00436123	-0.00580315	0.00392141		0.0501956	0.0105815	0.0102435
A	23	Sample X23	12818	12263	11856					A	23	0.096958	0.0773894	0.0632894	-0.272269	-0.272269			A	23	0	0	0			0	0		12	6.25	0.0993702	0.00858855	0.0113921	0.00615084	0.0180873	0.074633	0.0462403	0.0136733	-0.00145899	0.0345207	-0.00202777	0.022746	-0.000541474	-0.00336921	0.00243593		0.0274005	0.00695619	0.004849
A	24	Sample X24	15373	15151	13594					A	24	0.192471	0.183798	0.125001	-0.272269	-0.272269			A	24	0	0	0			0	0		14	3.125	0.0797467	-0.00451438	0.00672756	0.00219249	0.0114353	0.0523028	0.0327365	0.0104958	0.00021777	0.0198516	-0.00116838	0.013423	0.000336406	-0.00116482	0.00171144		0.0198721	0.00578595	0.00390532
B	1	Sample X25	15567	17775	19661					B	1	0.200111	0.291306	0.375939	-0.272269	-0.272269			B	1	0.15982	0.238754	0.337057			0.0197335	0		16	1.5625	0.0459688	-0.00070778	0.00361102	0.00167105	0.00809206	0.0299833	0.0264701	0.00706379	-0.000770809	0.0110332	-0.00256899	0.00736728	-0.00111518	-0.0047862	0.000380448		0.00618698	0.00675607	0.0035933
B	2	Sample X26	20297	24909	26736					B	2	0.406021	0.651355	0.764084	-0.272269	-0.272269			B	2	0.207885	0.473104	0.59354			0.0663047	0		18	0.78125	0.0253274	-0.00261309	0.00271666	0.00105227	0.0028288	0.0192927	0.0153045	0.00185917	0.0001283	na	-0.00720442	0.00141954	-0.00120947	-0.00324533	0.000222499		-0.000739253	0.00493935	0.00313684
B	3	Sample X27	15788	18317	20467					B	3	0.208884	0.314957	0.414201	-0.272269	-0.272269			B	3	0.168593	0.262404	0.375318			0.0234527	0		20	0.390625	0.0170394	-0.00287069	0.00163556	0.000333529	-0.000176362	0.0109725	0.00799139	na	0.000493661	na	-0.00190509	0.00342948	-0.00145183	-0.00274026	0.00054062		0.00214918	0.00137831	0.00218332
B	4	Sample X28	17999	20553	22027					B	4	0.301017	0.418361	0.49215	-0.272269	-0.272269			B	4	0.102881	0.24011	0.321606			0.0343072	0		22	0	0	0	0	0	0	0	0	na	0	na	0	0	0	0	0		0	0	0
B	5	Sample X29	15847	18163	20546					B	5	0.21124	0.308184	0.418022	-0.272269	-0.272269			B	5	0.170948	0.255631	0.379139			0.0211706	0
B	6	Sample X30	15748	17644	18935					B	6	0.207291	0.285668	0.342574	-0.272269	-0.272269			B	6	0.00915462	0.107417	0.17203			0.0245655	0
B	7	Sample X31	15010	17536	19426					B	7	0.178329	0.281042	0.365028	-0.272269	-0.272269			B	7	0.138038	0.228489	0.326145			0.022613	0
B	8	Sample X32	14853	16009	16674					B	8	0.172273	0.217734	0.244832	-0.272269	-0.272269			B	8	-0.0258629	0.0394827	0.0742879			0.0163364	0
B	9	Sample X33	14945	17268	18814					B	9	0.175817	0.26965	0.337111	-0.272269	-0.272269			B	9	0.135526	0.217097	0.298229			0.0203927	0
B	10	Sample X34	12244	13029	12884					B	10	0.0767265	0.104503	0.0993118	-0.272269	-0.272269			B	10	-0.12141	-0.0737482	-0.0712325			0.0119154	0
B	11	Sample X35	14498	16374	18167					B	11	0.158714	0.232519	0.308359	-0.272269	-0.272269			B	11	0.118423	0.179967	0.269476			0.0153859	0
B	12	Sample X36	11897	12541	12541					B	12	0.0647004	0.0871415	0.0871415	-0.272269	-0.272269			B	12	-0.133436	-0.09111	-0.0834028			0.0105815	0
B	13	Sample X37	14403	15608	16322					B	13	0.155117	0.201733	0.2304	-0.272269	-0.272269			B	13	0.114826	0.14918	0.191517			0.00858855	0
B	14	Sample X38	11608	11840	11982					B	14	0.0547994	0.0627394	0.0676322	-0.272269	-0.272269			B	14	-0.143337	-0.115512	-0.102912			0.00695619	0
B	15	Sample X39	13352	13192	13689					B	15	0.116168	0.110372	0.12849	-0.272269	-0.272269			B	15	0.0758772	0.0578197	0.0896071			-0.00451438	0
B	16	Sample X40	11452	11548	11273					B	16	0.0494977	0.0527568	0.043451	-0.272269	-0.272269			B	16	-0.148638	-0.125495	-0.127093			0.00578595	0
B	17	Sample X41	12763	13027	13105					B	17	0.0950009	0.104431	0.107235	-0.272269	-0.272269			B	17	0.0547098	0.0518786	0.0683526			-0.00070778	0
B	18	Sample X42	10515	10732	10858					B	18	0.01827	0.0254095	0.0295803	-0.272269	-0.272269			B	18	-0.179866	-0.152842	-0.140964			0.00675607	0
B	19	Sample X43	12152	12204	12033					B	19	0.0735232	0.0753324	0.0693957	-0.272269	-0.272269			B	19	0.0332321	0.0227797	0.030513			-0.00261309	0
B	20	Sample X44	9691	9687	9763					B	20	-0.00834796	-0.0084753	-0.00605268	-0.272269	-0.272269			B	20	-0.206484	-0.186727	-0.176597			0.00493935	0
B	21	Sample X45	11419	11442	11262					B	21	0.04838	0.0491589	0.0430807	-0.272269	-0.272269			B	21	0.00808891	-0.00339385	0.00419795			-0.00287069	0
B	22	Sample X46	12125	11708	11544					B	22	0.0725851	0.0582136	0.0526207	-0.272269	-0.272269			B	22	-0.125551	-0.120038	-0.117924			0.00137831	0
B	23	Sample X47	11179	11542	11137					B	23	0.0402911	0.0525527	0.0388827	-0.272269	-0.272269			B	23	0	0	0			0	0
B	24	Sample X48	15517	15008	14808					B	24	0.198136	0.178251	0.170544	-0.272269	-0.272269			B	24	0	0	0			0	0
C	1	Sample X49	17767	19334	20665					C	1	0.290961	0.360786	0.423803	-0.272269	-0.272269			C	1	0.244576	0.318849	0.373526			0.0185681	0
C	2	Sample X50	19895	25098	27203					C	2	0.386913	0.662561	0.794559	-0.272269	-0.272269			C	2	0.355473	0.641139	0.776781			0.0714166	0
C	3	Sample X51	17123	18885	20874					C	3	0.263537	0.340314	0.434029	-0.272269	-0.272269			C	3	0.217152	0.298377	0.383752			0.0203061	0
C	4	Sample X52	19505	23559	25175					C	4	0.368684	0.57415	0.667155	-0.272269	-0.272269			C	4	0.337244	0.552728	0.649377			0.053871	0
C	5	Sample X53	14381	15940	17518					C	5	0.154286	0.214963	0.280273	-0.272269	-0.272269			C	5	0.107901	0.173026	0.229996			0.0162813	0
C	6	Sample X54	16599	19815	21112					C	6	0.24174	0.383149	0.445787	-0.272269	-0.272269			C	6	0.2103	0.361727	0.428009			0.0378567	0
C	7	Sample X55	15455	16984	17472					C	7	0.195693	0.257711	0.27831	-0.272269	-0.272269			C	7	0.149308	0.215774	0.228033			0.0166164	0
C	8	Sample X56	14523	16583	16739					C	8	0.159663	0.241082	0.247519	-0.272269	-0.272269			C	8	0.128223	0.21966	0.229741			0.0228593	0
C	9	Sample X57	12865	14457	15443					C	9	0.0986336	0.15716	0.195221	-0.272269	-0.272269			C	9	0.0522485	0.115223	0.144943			0.0157437	0
C	10	Sample X58	12998	14498	14392					C	10	0.103391	0.158714	0.154701	-0.272269	-0.272269			C	10	0.0719509	0.137293	0.136923			0.0163354	0
C	11	Sample X59	13252	14473	15309					C	11	0.112542	0.157766	0.189963	-0.272269	-0.272269			C	11	0.0661568	0.115829	0.139686			0.0124181	0
C	12	Sample X60	12257	13130	13712					C	12	0.07718	0.108136	0.129336	-0.272269	-0.272269			C	12	0.04574	0.0867141	0.111558			0.0102435	0
C	13	Sample X61	12176	13333	13779					C	13	0.0743578	0.115478	0.131807	-0.272269	-0.272269			C	13	0.0279728	0.0735413	0.0815293			0.0113921	0
C	14	Sample X62	10583	10867	10950					C	14	0.0205013	0.0298789	0.0326375	-0.272269	-0.272269			C	14	-0.0109387	0.00845727	0.0148591			0.004849	0
C	15	Sample X63	12095	12735	12989					C	15	0.0715439	0.0940061	0.103068	-0.272269	-0.272269			C	15	0.0251589	0.0520691	0.0527908			0.00672756	0
C	16	Sample X64	10921	11089	11056					C	16	0.0316728	0.0372757	0.0361725	-0.272269	-0.272269			C	16	0.000232727	0.015854	0.018394			0.00390532	0
C	17	Sample X65	10923	11222	11287					C	17	0.0317393	0.0417353	0.0439225	-0.272269	-0.272269			C	17	-0.0146458	-0.000201686	-0.006355			0.00361102	0
C	18	Sample X66	11064	11194	10931					C	18	0.0364398	0.0407946	0.0320053	-0.272269	-0.272269			C	18	0.00499975	0.019373	0.0142269			0.0035933	0
C	19	Sample X67	11563	11751	11701					C	19	0.053267	0.0596856	0.0579742	-0.272269	-0.272269			C	19	0.00688196	0.0177486	0.00769672			0.00271666	0
C	20	Sample X68	11648	11722	11537					C	20	0.0561636	0.0586926	0.0523828	-0.272269	-0.272269			C	20	0.0247236	0.0372709	0.0346043			0.00313684	0
C	21	Sample X69	11779	11840	11626					C	21	0.0606452	0.0627394	0.055413	-0.272269	-0.272269			C	21	0.0142602	0.0208024	0.00513553			0.00163556	0
C	22	Sample X70	9969	9929	9671					C	22	0.000546387	-0.000738711	-0.00898451	-0.272269	-0.272269			C	22	-0.0308937	-0.0221604	-0.026763			0.00218332	0
C	23	Sample X71	11360	11228	11475					C	23	0.046385	0.041937	0.0502775	-0.272269	-0.272269			C	23	0	0	0			0	0
C	24	Sample X72	10914	10611	10500					C	24	0.03144	0.0214217	0.0177785	-0.272269	-0.272269			C	24	0	0	0			0	0
D	1	Sample X73	19802	21274	22885					D	1	0.382538	0.453861	0.537373	-0.272269	-0.272269			D	1	0.330733	0.403006	0.489669			0.0180682	0
D	2	Sample X74	20923	26117	29194					D	2	0.43644	0.724762	0.932936	-0.272269	-0.272269			D	2	0.387857	0.684337	0.893852			0.07412	0
D	3	Sample X75	16051	17674	19112					D	3	0.219425	0.286957	0.350616	-0.272269	-0.272269			D	3	0.16762	0.236102	0.302912			0.0171207	0
D	4	Sample X76	17132	20731	22508					D	4	0.263916	0.427023	0.517287	-0.272269	-0.272269			D	4	0.215332	0.386597	0.478204			0.0428162	0
D	5	Sample X77	16939	18325	19138					D	5	0.255831	0.31531	0.351802	-0.272269	-0.272269			D	5	0.204026	0.264456	0.304099			0.0151073	0
D	6	Sample X78	14957	16811	17518					D	6	0.17628	0.250504	0.280273	-0.272269	-0.272269			D	6	0.127697	0.210079	0.241189			0.0205953	0
D	7	Sample X79	14715	15936	16224					D	7	0.166981	0.214802	0.226418	-0.272269	-0.272269			D	7	0.115176	0.163948	0.178714			0.0121932	0
D	8	Sample X80	14236	15120	15495					D	8	0.148824	0.182593	0.197269	-0.272269	-0.272269			D	8	0.100241	0.142168	0.158185			0.0104817	0
D	9	Sample X81	13971	14919	15251					D	9	0.138921	0.174814	0.187696	-0.272269	-0.272269			D	9	0.0871157	0.12396	0.139992			0.00921112	0
D	10	Sample X82	12666	13197	13477					D	10	0.0915589	0.110553	0.120721	-0.272269	-0.272269			D	10	0.0429758	0.0701277	0.0816367			0.00678798	0
D	11	Sample X83	13911	14778	14405					D	11	0.136692	0.169393	0.155192	-0.272269	-0.272269			D	11	0.0848871	0.118539	0.107489			0.00841299	0
D	12	Sample X84	12112	12465	12388					D	12	0.0721338	0.0844656	0.081762	-0.272269	-0.272269			D	12	0.0235506	0.0440402	0.0426782			0.00512239	0
D	13	Sample X85	11463	12152	12691					D	13	0.0498706	0.0735232	0.0924448	-0.272269	-0.272269			D	13	-0.00193446	0.0226689	0.0447415			0.00615084	0
D	14	Sample X86	11829	11929	11728					D	14	0.0623614	0.0658031	0.058898	-0.272269	-0.272269			D	14	0.0137782	0.0253777	0.0198142			0.00289986	0
D	15	Sample X87	11667	11895	11790					D	15	0.0568123	0.0646315	0.0610225	-0.272269	-0.272269			D	15	0.00500725	0.0137772	0.0133192			0.00219249	0
D	16	Sample X88	11018	10864	10618					D	16	0.0349037	0.0297794	0.0216519	-0.272269	-0.272269			D	16	-0.0136795	-0.010646	-0.0174319			0.000758374	0
D	17	Sample X89	11562	11730	11566					D	17	0.053233	0.0589664	0.0533691	-0.272269	-0.272269			D	17	0.00142793	0.00811213	0.00566579			0.00167105	0
D	18	Sample X90	13296	13361	12980					D	18	0.114136	0.116495	0.102746	-0.272269	-0.272269			D	18	0.0655527	0.07607	0.0636619			0.00262933	0
D	19	Sample X91	11446	11542	11306					D	19	0.0492944	0.0525527	0.0445628	-0.272269	-0.272269			D	19	-0.00251063	0.00169845	-0.00314047			0.00105227	0
D	20	Sample X92	10454	10407	10288					D	20	0.0162729	0.0147371	0.0108599	-0.272269	-0.272269			D	20	-0.0323103	-0.0256883	-0.0282239			0.0016555	0
D	21	Sample X93	12218	12229	11871					D	21	0.0758201	0.0762035	0.0638054	-0.272269	-0.272269			D	21	0.0240151	0.0253492	0.0161021			0.000333529	0
D	22	Sample X94	11002	10917	10938					D	22	0.03437	0.0315398	0.0322382	-0.272269	-0.272269			D	22	-0.0142132	-0.0088856	-0.00684558			0.00133189	0
D	23	Sample X95	11520	11492	11399					D	23	0.051805	0.0508543	0.0477033	-0.272269	-0.272269			D	23	0	0	0			0	0
D	24	Sample X96	11425	11183	11143					D	24	0.0485832	0.0404254	0.0390838	-0.272269	-0.272269			D	24	0	0	0			0	0
E	1	Sample X97	17747	20692	22291					E	1	0.290099	0.425119	0.50588	-0.272269	-0.272269			E	1	0.288008	0.425151	0.513559			0.0342859	0
E	2	Sample X98	43236	51782	54594					E	2	2.56731	5.0384	6.5959	-0.272269	-0.272269			E	2	2.67506	5.14667	6.70673			0.617901	1
E	3	Sample X99	17997	20586	23003					E	3	0.30093	0.419962	0.54373	-0.272269	-0.272269			E	3	0.298839	0.419994	0.551409			0.0302887	0
E	4	Sample X100	37273	43735	45937					E	4	1.68464	2.66169	3.13158	-0.272269	-0.272269			E	4	1.7924	2.76996	3.2424			0.24439	0
E	5	Sample X101	15377	17912	19600					E	5	0.192628	0.297235	0.373097	-0.272269	-0.272269			E	5	0.190537	0.297267	0.380776			0.0266826	0
E	6	Sample X102	33825	40628	41794					E	6	1.31904	2.13215	2.31558	-0.272269	-0.272269			E	6	1.42679	2.24042	2.4264			0.203406	0
E	7	Sample X103	15328	18330	19957					E	7	0.190707	0.315531	0.389838	-0.272269	-0.272269			E	7	0.188616	0.315563	0.397517			0.0317367	0
E	8	Sample X104	25718	31735	31374					E	8	0.700041	1.13223	1.10219	-0.272269	-0.272269			E	8	0.807793	1.2405	1.21301			0.108176	0
E	9	Sample X105	13349	16112	17157					E	9	0.116059	0.221885	0.264967	-0.272269	-0.272269			E	9	0.113968	0.221917	0.272646			0.0269871	0
E	10	Sample X106	20889	26638	27995					E	10	0.434767	0.757778	0.847912	-0.272269	-0.272269			E	10	0.542519	0.866043	0.958733			0.0808809	0
E	11	Sample X107	12985	15434	15920					E	11	0.102925	0.194867	0.214161	-0.272269	-0.272269			E	11	0.100834	0.194899	0.22184			0.0235162	0
E	12	Sample X108	16441	20029	21154					E	12	0.235257	0.393246	0.447875	-0.272269	-0.272269			E	12	0.343009	0.50151	0.558696			0.0396253	0
E	13	Sample X109	14024	15844	15963					E	13	0.140894	0.21112	0.215886	-0.272269	-0.272269			E	13	0.138803	0.211152	0.223565			0.0180873	0
E	14	Sample X110	14072	16557	17346					E	14	0.142684	0.240013	0.272953	-0.272269	-0.272269			E	14	0.250436	0.348277	0.383774			0.0244603	0
E	15	Sample X111	12396	13612	14014					E	15	0.0820426	0.125661	0.140521	-0.272269	-0.272269			E	15	0.0799517	0.125693	0.1482			0.0114353	0
E	16	Sample X112	12382	13910	14336					E	16	0.0815517	0.136655	0.152588	-0.272269	-0.272269			E	16	0.189304	0.24492	0.263409			0.0139039	0
E	17	Sample X113	12753	13591	13453					E	17	0.0946455	0.124891	0.119845	-0.272269	-0.272269			E	17	0.0925546	0.124923	0.127524			0.00809206	0
E	18	Sample X114	10579	11557	11684					E	18	0.0203699	0.0530629	0.0573931	-0.272269	-0.272269			E	18	0.128122	0.161327	0.168214			0.00830129	0
E	19	Sample X115	11858	12124	11835					E	19	0.0633582	0.0725504	0.0625676	-0.272269	-0.272269			E	19	0.0612673	0.0725825	0.0702466			0.0028288	0
E	20	Sample X116	12323	12346	12924					E	20	0.0794858	0.0802906	0.100741	-0.272269	-0.272269			E	20	0.187238	0.188555	0.211562			0.000329259	0
E	21	Sample X117	11315	11231	11443					E	21	0.0448663	0.0420378	0.0491928	-0.272269	-0.272269			E	21	0.0427754	0.0420699	0.0568719			-0.000176362	0
E	22	Sample X118	10736	11007	10952					E	22	0.0255416	0.0345367	0.0327041	-0.272269	-0.272269			E	22	0.133294	0.142801	0.143525			0.00237684	0
E	23	Sample X119	10017	9951	9712					E	23	0.00209089	-3.21303e-05	-0.0076791	-0.272269	-0.272269			E	23	0	0	0			0	0
E	24	Sample X120	6389	6371	6281					E	24	-0.107752	-0.108265	-0.110821	-0.272269	-0.272269			E	24	0	0	0			0	0
F	1	Sample X121	35050	43295	47068					F	1	1.43989	2.57826	3.41329	-0.272269	-0.272269			F	1	1.36048	2.50377	3.34379			0.285822	0
F	2	Sample X122	41539	46945	49134					F	2	2.27403	3.38111	4.01996	-0.272269	-0.272269			F	2	2.32224	3.43154	4.0689			0.277326	0
F	3	Sample X123	29229	36642	40165					F	3	0.935499	1.61153	2.06374	-0.272269	-0.272269			F	3	0.856083	1.53703	1.99424			0.170237	0
F	4	Sample X124	37200	43523	44994					F	4	1.67603	2.6211	2.91884	-0.272269	-0.272269			F	4	1.72424	2.67154	2.96778			0.236825	0
F	5	Sample X125	29859	37905	41047					F	5	0.98246	1.76105	2.19617	-0.272269	-0.272269			F	5	0.903044	1.68656	2.12667			0.195878	0
F	6	Sample X126	25764	30967	32861					F	6	0.702866	1.06903	1.23004	-0.272269	-0.272269			F	6	0.751078	1.11947	1.27898			0.0920971	0
F	7	Sample X127	27209	34758	36414					F	7	0.794956	1.41025	1.58585	-0.272269	-0.272269			F	7	0.71554	1.33576	1.51635			0.155054	0
F	8	Sample X128	20980	24968	26210					F	8	0.439251	0.654842	0.730594	-0.272269	-0.272269			F	8	0.487462	0.705275	0.779536			0.0544531	0
F	9	Sample X129	25939	33000	36224					F	9	0.713674	1.24256	1.56474	-0.272269	-0.272269			F	9	0.634258	1.16806	1.49524			0.133451	0
F	10	Sample X130	16723	20002	21436					F	10	0.246857	0.391967	0.461991	-0.272269	-0.272269			F	10	0.295069	0.442399	0.510933			0.0368326	0
F	11	Sample X131	22924	29863	32672					F	11	0.53947	0.982763	1.21317	-0.272269	-0.272269			F	11	0.460054	0.908266	1.14367			0.112053	0
F	12	Sample X132	13931	16348	17317					F	12	0.137434	0.231459	0.271724	-0.272269	-0.272269			F	12	0.185646	0.281891	0.320666			0.0240614	0
F	13	Sample X133	19820	25339	27952					F	13	0.383384	0.676997	0.84496	-0.272269	-0.272269			F	13	0.303968	0.6025	0.775461			0.074633	0
F	14	Sample X134	12797	14262	14621					F	14	0.0962103	0.149801	0.163391	-0.272269	-0.272269			F	14	0.144422	0.200234	0.212334			0.0139531	0
F	15	Sample X135	17886	22186	24327					F	15	0.296107	0.5004	0.617472	-0.272269	-0.272269			F	15	0.216692	0.425903	0.547972			0.0523028	0
F	16	Sample X136	11469	12509	13087					F	16	0.050074	0.0860139	0.106588	-0.272269	-0.272269			F	16	0.0982854	0.136446	0.15553			0.00954021	0
F	17	Sample X137	14661	17510	18963					F	17	0.164917	0.279932	0.343843	-0.272269	-0.272269			F	17	0.0855013	0.205435	0.274343			0.0299833	0
F	18	Sample X138	14685	13759	14488					F	18	0.165834	0.131069	0.158335	-0.272269	-0.272269			F	18	0.214045	0.181501	0.207277			-0.00813598	0
F	19	Sample X139	14366	16213	17105					F	19	0.153719	0.225971	0.262781	-0.272269	-0.272269			F	19	0.0743035	0.151474	0.193281			0.0192927	0
F	20	Sample X140	12073	12376	12464					F	20	0.0707811	0.0813414	0.0844304	-0.272269	-0.272269			F	20	0.118992	0.131774	0.133373			0.00319533	0
F	21	Sample X141	11993	13098	14503					F	21	0.0680123	0.106983	0.158904	-0.272269	-0.272269			F	21	-0.0114035	0.0324864	0.0894045			0.0109725	0
F	22	Sample X142	12687	12802	12494					F	22	0.092303	0.0963882	0.0854857	-0.272269	-0.272269			F	22	0.140514	0.146821	0.134428			0.00157656	0
F	23	Sample X143	12321	12180	12036					F	23	0.0794158	0.074497	0.0694995	-0.272269	-0.272269			F	23	0	0	0			0	0
F	24	Sample X144	8411	8338	8387					F	24	-0.0482113	-0.0504323	-0.0489421	-0.272269	-0.272269			F	24	0	0	0			0	0
G	1	Sample X145	18774	24336	28018					G	1	0.335311	0.617989	0.849494	-0.272269	-0.272269			G	1	0.269577	0.558372	0.796159			0.0721986	0
G	2	Sample X146	45304	52719	54751					G	2	2.98674	5.48925	6.70394	-0.272269	-0.272269			G	2	2.91443	5.43178	6.65146			0.629339	1
G	3	Sample X147	19865	25833	30651					G	3	0.3855	0.707117	1.0438	-0.272269	-0.272269			G	3	0.319766	0.6475	0.99047			0.0819335	0
G	4	Sample X148	14535	14463	14369					G	4	0.160119	0.157387	0.153833	-0.272269	-0.272269			G	4	0.0878116	0.099926	0.101348			0.00302861	0
G	5	Sample X149	15985	20930	24212					G	5	0.216769	0.436785	0.610886	-0.272269	-0.272269			G	5	0.151035	0.377168	0.557551			0.0565331	0
G	6	Sample X150	29399	36422	40109					G	6	0.948016	1.58675	2.05562	-0.272269	-0.272269			G	6	0.875709	1.52928	2.00314			0.163394	0
G	7	Sample X151	19842	26013	29616					G	7	0.384418	0.718272	0.964159	-0.272269	-0.272269			G	7	0.318684	0.658655	0.910824			0.0849928	0
G	8	Sample X152	23199	27942	29210					G	8	0.554365	0.844274	0.934107	-0.272269	-0.272269			G	8	0.482058	0.786813	0.881623			0.0761888	0
G	9	Sample X153	17766	23011	26070					G	9	0.290918	0.544162	0.721825	-0.272269	-0.272269			G	9	0.225184	0.484545	0.66849			0.0648403	0
G	10	Sample X154	18901	23313	25413					G	10	0.341037	0.560595	0.681463	-0.272269	-0.272269			G	10	0.268729	0.503134	0.628979			0.0586011	0
G	11	Sample X155	18097	23269	26129					G	11	0.305294	0.558187	0.725513	-0.272269	-0.272269			G	11	0.23956	0.49857	0.672178			0.0647525	0
G	12	Sample X156	15706	18633	19337					G	12	0.20562	0.32899	0.360924	-0.272269	-0.272269			G	12	0.133313	0.271529	0.308439			0.034554	0
G	13	Sample X157	17006	20944	23156					G	13	0.258631	0.437475	0.552024	-0.272269	-0.272269			G	13	0.192897	0.377858	0.498689			0.0462403	0
G	14	Sample X158	13387	15345	15706					G	14	0.117441	0.191373	0.20562	-0.272269	-0.272269			G	14	0.0451335	0.133911	0.153135			0.0221945	0
G	15	Sample X159	14958	18002	19570					G	15	0.176319	0.301148	0.371701	-0.272269	-0.272269			G	15	0.110585	0.241531	0.318366			0.0327365	0
G	16	Sample X160	21238	22626	23954					G	16	0.452061	0.523537	0.596238	-0.272269	-0.272269			G	16	0.379754	0.466076	0.543753			0.0215804	0
G	17	Sample X161	14448	16957	18107					G	17	0.156819	0.256583	0.305731	-0.272269	-0.272269			G	17	0.0910852	0.196966	0.252396			0.0264701	0
G	18	Sample X162	8901	9840	10539					G	18	-0.0331586	-0.0035916	0.0190569	-0.272269	-0.272269			G	18	-0.105466	-0.061053	-0.0334279			0.0111032	0
G	19	Sample X163	12254	13789	14233					G	19	0.0770753	0.132176	0.148712	-0.272269	-0.272269			G	19	0.0113412	0.072559	0.0953767			0.0153045	0
G	20	Sample X164	12327	12924	12871					G	20	0.0796257	0.100741	0.0988477	-0.272269	-0.272269			G	20	0.00731832	0.0432797	0.046363			0.00899034	0
G	21	Sample X165	13434	14134	14474					G	21	0.119152	0.145001	0.157804	-0.272269	-0.272269			G	21	0.0534181	0.0853836	0.104469			0.00799139	0
G	22	Sample X166	10944	11587	11751					G	22	0.0324378	0.054084	0.0596856	-0.272269	-0.272269			G	22	-0.0398695	-0.00337747	0.00720081			0.00912301	0
G	23	Sample X167	11927	11749	11565					G	23	0.0657341	0.059617	0.0533351	-0.272269	-0.272269			G	23	0	0	0			0	0
G	24	Sample X168	12117	11686	11540					G	24	0.0723074	0.0574614	0.0524847	-0.272269	-0.272269			G	24	0	0	0			0	0
H	1	Sample X169	17737	20659	22750					H	1	0.289668	0.423511	0.530141	-0.272269	-0.272269			H	1	0.543004	0.682412	0.78871			0.0348519	0
H	2	Sample X170	23615	29879	31479					H	2	0.577257	0.983976	1.11086	-0.272269	-0.272269			H	2	0.493459	0.928359	1.08079			0.108725	0
H	3	Sample X171	17307	20588	22429					H	3	0.2713	0.420059	0.513122	-0.272269	-0.272269			H	3	0.524637	0.67896	0.771691			0.0385809	0
H	4	Sample X172	19144	23895	25153					H	4	0.352076	0.592913	0.665841	-0.272269	-0.272269			H	4	0.268278	0.537295	0.635763			0.0672544	0
H	5	Sample X173	15492	18457	19891					H	5	0.19715	0.321152	0.386724	-0.272269	-0.272269			H	5	0.450487	0.580052	0.645293			0.0323914	0
H	6	Sample X174	16207	19726	20596					H	6	0.225728	0.378977	0.420448	-0.272269	-0.272269			H	6	0.141931	0.323359	0.39037			0.0453571	0
H	7	Sample X175	13159	15737	16879					H	7	0.109181	0.206853	0.253331	-0.272269	-0.272269			H	7	0.362518	0.465754	0.5119			0.025809	0
H	8	Sample X176	13200	16059	16294					H	8	0.110661	0.219747	0.229261	-0.272269	-0.272269			H	8	0.0268637	0.164129	0.199182			0.0343164	0
H	9	Sample X177	14055	16600	17553					H	9	0.142049	0.241781	0.281769	-0.272269	-0.272269			H	9	0.395386	0.500682	0.540338			0.0263241	0
H	10	Sample X178	13599	15213	14917					H	10	0.125184	0.186213	0.174737	-0.272269	-0.272269			H	10	0.0413863	0.130595	0.144659			0.0223023	0
H	11	Sample X179	14159	15731	16404					H	11	0.145937	0.206614	0.233744	-0.272269	-0.272269			H	11	0.399273	0.465515	0.492313			0.0165605	0
H	12	Sample X180	12833	14499	13636					H	12	0.0974924	0.158752	0.126542	-0.272269	-0.272269			H	12	0.0136947	0.103135	0.0964636			0.02236	0
H	13	Sample X181	13413	14729	15052					H	13	0.118387	0.167516	0.179955	-0.272269	-0.272269			H	13	0.371724	0.426417	0.438524			0.0136733	0
H	14	Sample X182	12010	12907	12154					H	14	0.0686	0.100133	0.0735927	-0.272269	-0.272269			H	14	-0.0151977	0.0445157	0.0435146			0.0149284	0
H	15	Sample X183	12777	13782	13584					H	15	0.0954987	0.131918	0.124634	-0.272269	-0.272269			H	15	0.348835	0.390818	0.383203			0.0104958	0
H	16	Sample X184	12967	13557	12501					H	16	0.10228	0.123645	0.0857322	-0.272269	-0.272269			H	16	0.0184823	0.0680274	0.0556541			0.0123863	0
H	17	Sample X185	12285	12927	12623					H	17	0.0781575	0.100848	0.090037	-0.272269	-0.272269			H	17	0.331494	0.359749	0.348606			0.00706379	0
H	18	Sample X186	13165	13263	13073					H	18	0.109398	0.11294	0.106084	-0.272269	-0.272269			H	18	0.0256	0.0573224	0.0760059			0.0079306	0
H	19	Sample X187	12057	12111	12379					H	19	0.0702267	0.0720991	0.0814465	-0.272269	-0.272269			H	19	0.323563	0.331	0.340016			0.00185917	0
H	20	Sample X188	12084	12633	11652					H	20	0.0711624	0.0903907	0.0563001	-0.272269	-0.272269			H	20	-0.0126353	0.034773	0.026222			0.0118521	0
H	21	Sample X189	246	223	217					H	21	-0.266517	-0.267057	-0.267198	-0.272269	-0.272269			H	21	-0.0131808	-0.00815608	-0.00862857			0.00125619	1
H	22	Sample X190	12162	12188	11392					H	22	0.0738709	0.0747754	0.0474666	-0.272269	-0.272269			H	22	-0.00992689	0.0191577	0.0173885			0.00727114	0
H	23	Sample X191	803	569	583					H	23	-0.253337	-0.258901	-0.258569	-0.272269	-0.272269			H	23	0	0	0			0	1
H	24	Sample X192	12446	11632	10873					H	24	0.0837977	0.0556177	0.0300781	-0.272269	-0.272269			H	24	0	0	0			0	0
I	1	Sample X193	13133	13819	13981					I	1	0.108244	0.133285	0.139293	-0.272269	-0.272269			I	1	-0.113036	-0.0859789	-0.0672421			0.00676416	0
I	2	Sample X194	8727	11911	12103					I	2	-0.0385329	0.0651826	0.0718215	-0.272269	-0.272269			I	2	-0.371374	-0.346702	-0.395015			0.00616797	0
I	3	Sample X195	12695	12721	12450					I	3	0.0925867	0.093509	0.0839383	-0.272269	-0.272269			I	3	-0.128693	-0.125755	-0.122596			0.000734556	0
I	4	Sample X196	11723	11350	12169					I	4	0.0587268	0.0460473	0.0741143	-0.272269	-0.272269			I	4	-0.274114	-0.365838	-0.392723			-0.0229308	0
I	5	Sample X197	12736	12980	13001					I	5	0.0940416	0.102746	0.103499	-0.272269	-0.272269			I	5	-0.127238	-0.116518	-0.103036			0.00268	0
I	6	Sample X198	9329	9724	9749					I	6	-0.0198013	-0.00729667	-0.00649943	-0.272269	-0.272269			I	6	-0.352643	-0.419182	-0.473336			-0.0166348	0
I	7	Sample X199	10292	10027	10040					I	7	0.01099	0.00241299	0.00283188	-0.272269	-0.272269			I	7	-0.210289	-0.216851	-0.203703			-0.00164029	0
I	8	Sample X200	12014	12897	12089					I	8	0.0687383	0.0997761	0.0713358	-0.272269	-0.272269			I	8	-0.264103	-0.312109	-0.395501			-0.0120015	0
I	9	Sample X201	11469	11468	11300					I	9	0.050074	0.0500401	0.0443606	-0.272269	-0.272269			I	9	-0.171205	-0.169223	-0.162174			0.000495487	0
I	10	Sample X202	11060	11407	10836					I	10	0.0363061	0.0479739	0.0288507	-0.272269	-0.272269			I	10	-0.296535	-0.363911	-0.437986			-0.0168439	0
I	11	Sample X203	12474	12515	12259					I	11	0.084782	0.0862252	0.0772498	-0.272269	-0.272269			I	11	-0.136497	-0.133038	-0.129285			0.000864747	0
I	12	Sample X204	11085	11435	10981					I	12	0.0371419	0.0489218	0.03367	-0.272269	-0.272269			I	12	-0.295699	-0.362963	-0.433167			-0.0168159	0
I	13	Sample X205	11650	11419	11363					I	13	0.0562319	0.04838	0.0464864	-0.272269	-0.272269			I	13	-0.165048	-0.170883	-0.160048			-0.00145899	0
I	14	Sample X206	10810	11081	10821					I	14	0.0279892	0.0370081	0.0283536	-0.272269	-0.272269			I	14	-0.304852	-0.374877	-0.438483			-0.0175062	0
I	15	Sample X207	10475	10440	10225					I	15	0.0169599	0.0158151	0.0088139	-0.272269	-0.272269			I	15	-0.204319	-0.203448	-0.197721			0.00021777	0
I	16	Sample X208	9130	9197	9050					I	16	-0.0260364	-0.0239419	-0.0285309	-0.272269	-0.272269			I	16	-0.358878	-0.435827	-0.495368			-0.0192373	0
I	17	Sample X209	10698	10543	10193					I	17	0.0242872	0.0191881	0.00777638	-0.272269	-0.272269			I	17	-0.196992	-0.200075	-0.198758			-0.000770809	0
I	18	Sample X210	11796	11376	11351					I	18	0.0612284	0.0469256	0.0460811	-0.272269	-0.272269			I	18	-0.271613	-0.364959	-0.420756			-0.0233366	0
I	19	Sample X211	8038	7988	8148					I	19	-0.0595021	-0.0610047	-0.0561872	-0.272269	-0.272269			I	19	-0.280781	-0.280268	-0.262722			0.0001283	0
I	20	Sample X212	8080	7962	7866					I	20	-0.0582379	-0.0617851	-0.0646606	-0.272269	-0.272269			I	20	-0.391079	-0.47367	-0.531497			-0.0206477	0
I	21	Sample X213	16630	16629	16255					I	21	0.243017	0.242976	0.227676	-0.272269	-0.272269			I	21	0.0217378	0.0237124	0.0211409			0.000493661	0
I	22	Sample X214	10172	9747	9519					I	22	0.00709615	-0.00656324	-0.0138078	-0.272269	-0.272269			I	22	-0.325745	-0.418448	-0.480645			-0.0231757	0
I	23	Sample X215	16097	16047	15729					I	23	0.221279	0.219264	0.206535	-0.272269	-0.272269			I	23	0	0	0			0	0
I	24	Sample X216	18719	20419	21532					I	24	0.332841	0.411885	0.466837	-0.272269	-0.272269			I	24	0	0	0			0	0
J	1	Sample X217	38186	39827	40704					J	1	1.7961	2.01527	2.14361	-0.272269	-0.272269			J	1	2.05425	2.27443	2.40325			0.0550459	0
J	2	Sample X218	50492	57397	60105					J	2	4.50144	9.0562	13.3329	-0.272269	-0.272269			J	2	4.4586	9.01702	13.2974			1.1396	1
J	3	Sample X219	35485	38859	39826					J	3	1.48507	1.88289	2.01513	-0.272269	-0.272269			J	3	1.74321	2.14206	2.27476			0.0997108	0
J	4	Sample X220	45358	54732	58391					J	4	2.99876	6.69072	10.3135	-0.272269	-0.272269			J	4	2.95592	6.65153	10.2779			0.923905	1
J	5	Sample X221	28501	32115	33856					J	5	0.883148	1.16453	1.32199	-0.272269	-0.272269			J	5	1.14129	1.4237	1.58162			0.0706014	0
J	6	Sample X222	40137	50594	55385					J	6	2.05968	4.54083	7.16993	-0.272269	-0.272269			J	6	2.01683	4.50164	7.13439			0.621202	1
J	7	Sample X223	26555	31182	32937					J	7	0.752461	1.08645	1.23687	-0.272269	-0.272269			J	7	1.0106	1.34561	1.49651			0.0837528	0
J	8	Sample X224	30562	40714	44331					J	8	1.03678	2.14512	2.77986	-0.272269	-0.272269			J	8	0.993933	2.10594	2.74432			0.278002	0
J	9	Sample X225	21951	26185	27767					J	9	0.488228	0.729023	0.832332	-0.272269	-0.272269			J	9	0.74637	0.988185	1.09197			0.0604537	0
J	10	Sample X226	27313	38149	42015					J	10	0.801842	1.79145	2.35227	-0.272269	-0.272269			J	10	0.758997	1.75226	2.31673			0.248317	0
J	11	Sample X227	18679	22800	24270					J	11	0.331048	0.532814	0.614203	-0.272269	-0.272269			J	11	0.589191	0.791976	0.873838			0.0506962	0
J	12	Sample X228	23409	32502	35983					J	12	0.565866	1.19816	1.53834	-0.272269	-0.272269			J	12	0.523021	1.15898	1.50281			0.158989	0
J	13	Sample X229	16286	19447	20650					J	13	0.228935	0.365999	0.423073	-0.272269	-0.272269			J	13	0.487077	0.62516	0.682708			0.0345207	0
J	14	Sample X230	20415	27548	30821					J	14	0.411692	0.817537	1.05732	-0.272269	-0.272269			J	14	0.368847	0.778353	1.02178			0.102376	0
J	15	Sample X231	15285	17215	18059					J	15	0.189024	0.267411	0.303634	-0.272269	-0.272269			J	15	0.447166	0.526573	0.563269			0.0198516	0
J	16	Sample X232	17330	21896	23794					J	16	0.272274	0.485397	0.587242	-0.272269	-0.272269			J	16	0.229429	0.446213	0.551704			0.0541958	0
J	17	Sample X233	13585	14736	15328					J	17	0.124671	0.167784	0.190707	-0.272269	-0.272269			J	17	0.382813	0.426946	0.450342			0.0110332	0
J	18	Sample X234	13861	16713	17273					J	18	0.134839	0.246444	0.269861	-0.272269	-0.272269			J	18	0.0919937	0.207259	0.234323			0.0288164	0
J	19	Sample X235	890	913	966					J	19	-0.251258	-0.250707	-0.249437	-0.272269	-0.272269			J	19	0.00688449	0.0084542	0.0101978			0.000392426	1
J	20	Sample X236	14418	16026	17021					J	20	0.155684	0.218418	0.259258	-0.272269	-0.272269			J	20	0.112839	0.179234	0.223721			0.0165987	0
J	21	Sample X237	840	839	830					J	21	-0.252453	-0.252477	-0.252692	-0.272269	-0.272269			J	21	0.0056891	0.00668443	0.00694306			0.000248832	1
J	22	Sample X238	13180	13970	14450					J	22	0.109939	0.138884	0.156895	-0.272269	-0.272269			J	22	0.0670941	0.0996992	0.121357			0.00815129	0
J	23	Sample X239	601	558	538					J	23	-0.258142	-0.259161	-0.259635	-0.272269	-0.272269			J	23	0	0	0			0	1
J	24	Sample X240	11255	11146	11037					J	24	0.0428451	0.0391843	0.0355379	-0.272269	-0.272269			J	24	0	0	0			0	0
K	1	Sample X241	32938	33838	32572					K	1	1.23696	1.32028	1.20432	-0.272269	-0.272269			K	1	1.01006	1.08092	0.995838			0.0177165	0
K	2	Sample X242	40200	48109	49503					K	2	2.06883	3.70239	4.1434	-0.272269	-0.272269			K	2	2.02089	3.65346	4.10344			0.408144	0
K	3	Sample X243	23475	24435	23687					K	3	0.569504	0.623689	0.581263	-0.272269	-0.272269			K	3	0.3426	0.384334	0.372777			0.0104336	0
K	4	Sample X244	33896	45349	45232					K	4	1.3258	2.99675	2.97079	-0.272269	-0.272269			K	4	1.27786	2.94783	2.93084			0.417492	0
K	5	Sample X245	19326	20887	20548					K	5	0.360417	0.434668	0.418119	-0.272269	-0.272269			K	5	0.133513	0.195313	0.209633			0.0154499	0
K	6	Sample X246	29595	40868	44661					K	6	0.962588	2.16857	2.84801	-0.272269	-0.272269			K	6	0.914648	2.11965	2.80805			0.30125	0
K	7	Sample X247	15225	15502	14036					K	7	0.186681	0.197545	0.141341	-0.272269	-0.272269			K	7	-0.0402233	-0.0418109	-0.067145			-0.000396889	0
K	8	Sample X248	26986	38600	42955					K	8	0.78031	1.84901	2.51589	-0.272269	-0.272269			K	8	0.73237	1.80008	2.47593			0.266929	0
K	9	Sample X249	14926	15014	14061					K	9	0.175084	0.178484	0.142273	-0.272269	-0.272269			K	9	-0.05182	-0.0608719	-0.0662126			-0.00226298	0
K	10	Sample X250	24146	34286	38213					K	10	0.607122	1.36346	1.79951	-0.272269	-0.272269			K	10	0.559182	1.31454	1.75955			0.188839	0
K	11	Sample X251	13405	12719	12349					K	11	0.118096	0.0934381	0.0803956	-0.272269	-0.272269			K	11	-0.108808	-0.145917	-0.12809			-0.00927724	0
K	12	Sample X252	21243	29248	32495					K	12	0.452311	0.936893	1.19755	-0.272269	-0.272269			K	12	0.404371	0.887971	1.15759			0.1209	0
K	13	Sample X253	12058	12183	11502					K	13	0.0702613	0.0746014	0.0511937	-0.272269	-0.272269			K	13	-0.156643	-0.164754	-0.157292			-0.00202777	0
K	14	Sample X254	17637	23027	25266					K	14	0.285368	0.545027	0.672607	-0.272269	-0.272269			K	14	0.237428	0.496105	0.632651			0.0646694	0
K	15	Sample X255	11034	11266	10850					K	15	0.0354377	0.0432153	0.0293149	-0.272269	-0.272269			K	15	-0.191467	-0.19614	-0.179171			-0.00116838	0
K	16	Sample X256	14976	18278	19751					K	16	0.177014	0.313238	0.380147	-0.272269	-0.272269			K	16	0.129074	0.264316	0.340191			0.0338104	0
K	17	Sample X257	12374	12436	11835					K	17	0.0812713	0.0834464	0.0625676	-0.272269	-0.272269			K	17	-0.145633	-0.155909	-0.145918			-0.00256899	0
K	18	Sample X258	14598	16413	16654					K	18	0.162515	0.234112	0.244007	-0.272269	-0.272269			K	18	0.114575	0.18519	0.204051			0.0176537	0
K	19	Sample X259	17916	17536	16914					K	19	0.297409	0.281042	0.254789	-0.272269	-0.272269			K	19	0.0705044	0.0416868	0.0463029			-0.00720442	0
K	20	Sample X260	12806	13644	14302					K	20	0.0965306	0.126836	0.151307	-0.272269	-0.272269			K	20	0.0485905	0.0779137	0.111351			0.0073308	0
K	21	Sample X261	17267	17381	17143					K	21	0.269608	0.274438	0.264378	-0.272269	-0.272269			K	21	0.0427033	0.0350829	0.0558924			-0.00190509	0
K	22	Sample X262	12366	13028	13113					K	22	0.080991	0.104467	0.107523	-0.272269	-0.272269			K	22	0.0330509	0.0555455	0.0675678			0.00562365	0
K	23	Sample X263	16236	16541	15778					K	23	0.226904	0.239355	0.208486	-0.272269	-0.272269			K	23	0	0	0			0	0
K	24	Sample X264	11406	11435	11169					K	24	0.0479401	0.0489218	0.0399556	-0.272269	-0.272269			K	24	0	0	0			0	0
L	1	Sample X265	35360	37153	37100					L	1	1.47196	1.6705	1.66429	-0.272269	-0.272269			L	1	1.40871	1.60951	1.61044			0.0502015	0
L	2	Sample X266	44134	50559	49723					L	2	2.74012	4.52726	4.2195	-0.272269	-0.272269			L	2	2.70468	4.49275	4.18869			0.447018	1
L	3	Sample X267	30602	34361	32411					L	3	1.03993	1.3708	1.19019	-0.272269	-0.272269			L	3	0.976677	1.30982	1.13634			0.0832849	0
L	4	Sample X268	39427	46777	44888					L	4	1.95944	3.33779	2.89606	-0.272269	-0.272269			L	4	1.924	3.30329	2.86525			0.344822	0
L	5	Sample X269	24923	28748	28852					L	5	0.652182	0.900687	0.908139	-0.272269	-0.272269			L	5	0.588927	0.839698	0.854294			0.062693	0
L	6	Sample X270	33713	41181	41298					L	6	1.30844	2.21708	2.23552	-0.272269	-0.272269			L	6	1.273	2.18258	2.20471			0.227394	0
L	7	Sample X271	23458	26810	26600					L	7	0.568566	0.768866	0.755341	-0.272269	-0.272269			L	7	0.505311	0.707878	0.701496			0.0506417	0
L	8	Sample X272	26366	31501	32192					L	8	0.740436	1.11269	1.17117	-0.272269	-0.272269			L	8	0.704998	1.07818	1.14036			0.0932967	0
L	9	Sample X273	18138	21072	21701					L	9	0.307088	0.443802	0.475417	-0.272269	-0.272269			L	9	0.243833	0.382814	0.421571			0.0347453	0
L	10	Sample X274	20028	24580	25229					L	10	0.393198	0.632087	0.670387	-0.272269	-0.272269			L	10	0.357761	0.597583	0.639578			0.0599557	0
L	11	Sample X275	16110	18763	19748					L	11	0.221804	0.334817	0.380007	-0.272269	-0.272269			L	11	0.158549	0.273829	0.326161			0.0288199	0
L	12	Sample X276	16445	19394	20227					L	12	0.23542	0.363551	0.40267	-0.272269	-0.272269			L	12	0.199983	0.329047	0.371861			0.0322662	0
L	13	Sample X277	15622	17768	18274					L	13	0.202287	0.291004	0.313061	-0.272269	-0.272269			L	13	0.139032	0.230016	0.259216			0.022746	0
L	14	Sample X278	13689	15392	16320					L	14	0.12849	0.193217	0.230319	-0.272269	-0.272269			L	14	0.0930521	0.158713	0.19951			0.0164153	0
L	15	Sample X279	13530	14900	15514					L	15	0.122657	0.174082	0.198018	-0.272269	-0.272269			L	15	0.059402	0.113094	0.144172			0.013423	0
L	16	Sample X280	12295	13345	13804					L	16	0.0785069	0.115914	0.13273	-0.272269	-0.272269			L	16	0.0430692	0.0814107	0.101922			0.00958537	0
L	17	Sample X281	12208	12978	13146					L	17	0.0754717	0.102674	0.108712	-0.272269	-0.272269			L	17	0.0122167	0.0416858	0.0548669			0.00736728	0
L	18	Sample X282	12134	12496	12879					L	18	0.0728977	0.0855561	0.0991333	-0.272269	-0.272269			L	18	0.03746	0.0510528	0.0683246			0.00339819	0
L	19	Sample X283	12142	12240	12305					L	19	0.0731757	0.076587	0.0788564	-0.272269	-0.272269			L	19	0.00992062	0.0155988	0.0250108			0.00141954	0
L	20	Sample X284	12115	12101	12280					L	20	0.0722379	0.0717521	0.0779829	-0.272269	-0.272269			L	20	0.0368002	0.0372487	0.0471743			0.000112114	0
L	21	Sample X285	12613	12935	12692					L	21	0.0896834	0.101135	0.0924803	-0.272269	-0.272269			L	21	0.0264284	0.0401463	0.0386347			0.00342948	0
L	22	Sample X286	10950	11054	10878					L	22	0.0326375	0.0361056	0.0302441	-0.272269	-0.272269			L	22	-0.00280016	0.00160226	-0.000564569			0.0011006	0
L	23	Sample X287	11855	11789	11580					L	23	0.063255	0.0609882	0.0538456	-0.272269	-0.272269			L	23	0	0	0			0	0
L	24	Sample X288	11034	11006	10895					L	24	0.0354377	0.0345034	0.0308086	-0.272269	-0.272269			L	24	0	0	0			0	0
M	1	Sample X289	29376	29344	30016					M	1	0.946316	0.943954	0.994411	-0.272269	-0.272269			M	1	0.948274	0.947258	1.00247			-0.000254058	0
M	2	Sample X290	41481	52242	51512					M	2	2.26469	5.25258	4.91861	-0.272269	-0.272269			M	2	2.23099	5.20788	4.8879			0.744223	1
M	3	Sample X291	24029	22003	23440					M	3	0.600478	0.49091	0.567574	-0.272269	-0.272269			M	3	0.602436	0.494214	0.575635			-0.0270556	0
M	4	Sample X292	40037	41781	44750					M	4	2.04524	2.31344	2.86673	-0.272269	-0.272269			M	4	2.01154	2.26874	2.83602			0.0643006	0
M	5	Sample X293	18804	19730	18936					M	5	0.336661	0.379164	0.34262	-0.272269	-0.272269			M	5	0.338619	0.382467	0.350681			0.0109621	0
M	6	Sample X294	28807	34452	33244					M	6	0.90491	1.37976	1.26479	-0.272269	-0.272269			M	6	0.871206	1.33506	1.23408			0.115965	0
M	7	Sample X295	14979	14606	14271					M	7	0.17713	0.16282	0.15014	-0.272269	-0.272269			M	7	0.179088	0.166123	0.158201			-0.00324119	0
M	8	Sample X296	22273	26155	26755					M	8	0.504939	0.727142	0.76531	-0.272269	-0.272269			M	8	0.471235	0.682444	0.734601			0.0528021	0
M	9	Sample X297	13630	13965	13452					M	9	0.126321	0.138698	0.119808	-0.272269	-0.272269			M	9	0.128279	0.142001	0.12787			0.00343046	0
M	10	Sample X298	17559	20964	20917					M	10	0.282026	0.438461	0.436144	-0.272269	-0.272269			M	10	0.248322	0.393763	0.405435			0.0363603	0
M	11	Sample X299	12409	12864	12308					M	11	0.0824986	0.0985979	0.0789612	-0.272269	-0.272269			M	11	0.0844565	0.101901	0.0870226			0.00436123	0
M	12	Sample X300	14535	17139	17697					M	12	0.160119	0.26421	0.287946	-0.272269	-0.272269			M	12	0.126416	0.219512	0.257237			0.0232741	0
M	13	Sample X301	11938	11836	11507					M	13	0.0661134	0.0626019	0.0513635	-0.272269	-0.272269			M	13	0.0680713	0.0659054	0.0594249			-0.000541474	0
M	14	Sample X302	12663	14059	14298					M	14	0.0914527	0.142199	0.151156	-0.272269	-0.272269			M	14	0.0577494	0.0975008	0.120447			0.00993786	0
M	15	Sample X303	11185	11185	11006					M	15	0.0404925	0.0404925	0.0345034	-0.272269	-0.272269			M	15	0.0424504	0.043796	0.0425647			0.000336406	0
M	16	Sample X304	11531	12301	12581					M	16	0.0521788	0.0787166	0.0885528	-0.272269	-0.272269			M	16	0.0184755	0.0340189	0.0578439			0.00388583	0
M	17	Sample X305	10629	10452	10252					M	17	0.0220138	0.0162075	0.00969021	-0.272269	-0.272269			M	17	0.0239717	0.019511	0.0177516			-0.00111518	0
M	18	Sample X306	12046	12192	12313					M	18	0.0698457	0.0749146	0.079136	-0.272269	-0.272269			M	18	0.0361425	0.0302169	0.0484271			-0.00148138	0
M	19	Sample X307	10709	10521	10416					M	19	0.0246501	0.0184666	0.015031	-0.272269	-0.272269			M	19	0.026608	0.0217701	0.0230923			-0.00120947	0
M	20	Sample X308	11784	11801	11875					M	20	0.0608167	0.0614	0.063943	-0.272269	-0.272269			M	20	0.0271134	0.0167023	0.033234			-0.00260279	0
M	21	Sample X309	10527	10308	10211					M	21	0.0186633	0.0115104	0.00835984	-0.272269	-0.272269			M	21	0.0206212	0.0148139	0.0164212			-0.00145183	0
M	22	Sample X310	11464	11508	11266					M	22	0.0499045	0.0513975	0.0432153	-0.272269	-0.272269			M	22	0.0162012	0.00669978	0.0125063			-0.00237536	0
M	23	Sample X311	9891	9849	9700					M	23	-0.00195789	-0.00330351	-0.00806136	-0.272269	-0.272269			M	23	0	0	0			0	0
M	24	Sample X312	10982	11310	10892					M	24	0.0337033	0.0446977	0.030709	-0.272269	-0.272269			M	24	0	0	0			0	0
N	1	Sample X313	18945	18681	18673					N	1	0.343027	0.331138	0.33078	-0.272269	-0.272269			N	1	0.255216	0.232933	0.243109			-0.00557076	0
N	2	Sample X314	18683	20124	20596					N	2	0.331228	0.397757	0.420448	-0.272269	-0.272269			N	2	0.277144	0.344524	0.377131			0.0168452	0
N	3	Sample X315	16311	16290	16166					N	3	0.229952	0.229098	0.224068	-0.272269	-0.272269			N	3	0.142141	0.130892	0.136397			-0.00281205	0
N	4	Sample X316	15660	17123	17424					N	4	0.203794	0.263537	0.276266	-0.272269	-0.272269			N	4	0.14971	0.210304	0.23295			0.0151486	0
N	5	Sample X317	13095	13120	13101					N	5	0.106875	0.107776	0.107091	-0.272269	-0.272269			N	5	0.0190638	0.00957	0.0194209			-0.00237345	0
N	6	Sample X318	13704	14456	14253					N	6	0.129042	0.157122	0.149463	-0.272269	-0.272269			N	6	0.0749579	0.103889	0.106147			0.00723284	0
N	7	Sample X319	13490	13052	12673					N	7	0.121195	0.105329	0.0918069	-0.272269	-0.272269			N	7	0.0333836	0.00712371	0.0041364			-0.00656496	0
N	8	Sample X320	12914	13687	13617					N	8	0.100384	0.128416	0.125844	-0.272269	-0.272269			N	8	0.0462996	0.0751833	0.082528			0.00722091	0
N	9	Sample X321	13005	12903	12735					N	9	0.103642	0.0999904	0.0940061	-0.272269	-0.272269			N	9	0.0158304	0.00178495	0.00633558			-0.00351136	0
N	10	Sample X322	12304	12947	12344					N	10	0.0788214	0.101564	0.0802206	-0.272269	-0.272269			N	10	0.0247374	0.0483309	0.0369043			0.00589838	0
N	11	Sample X323	13138	12780	12809					N	11	0.108424	0.0956054	0.0966375	-0.272269	-0.272269			N	11	0.0206125	-0.00260011	0.00896698			-0.00580315	0
N	12	Sample X324	11619	11914	11538					N	12	0.0551744	0.065286	0.0524168	-0.272269	-0.272269			N	12	0.00109039	0.012053	0.00910045			0.00274066	0
N	13	Sample X325	11794	11704	11624					N	13	0.0611598	0.0580768	0.0553448	-0.272269	-0.272269			N	13	-0.0266518	-0.0401287	-0.0323256			-0.00336921	0
N	14	Sample X326	11982	12109	11821					N	14	0.0676322	0.0720297	0.0620866	-0.272269	-0.272269			N	14	0.0135483	0.0187967	0.0187703			0.00131211	0
N	15	Sample X327	12400	12563	12489					N	15	0.0821829	0.0879175	0.0853098	-0.272269	-0.272269			N	15	-0.00562875	-0.010288	-0.00236071			-0.00116482	0
N	16	Sample X328	11373	11515	11254					N	16	0.0468243	0.0516352	0.0428114	-0.272269	-0.272269			N	16	-0.00725971	-0.00159778	-0.000504875			0.00141548	0
N	17	Sample X329	12686	12438	12109					N	17	0.0922676	0.0835167	0.0720297	-0.272269	-0.272269			N	17	0.00445598	-0.0146888	-0.0156408			-0.0047862	0
N	18	Sample X330	11932	11639	11457					N	18	0.0659065	0.0558565	0.0496672	-0.272269	-0.272269			N	18	0.0118225	0.00262351	0.00635089			-0.00229976	0
N	19	Sample X331	12350	12276	11990					N	19	0.0804306	0.0778432	0.0679086	-0.272269	-0.272269			N	19	-0.00738098	-0.0203623	-0.0197619			-0.00324533	0
N	20	Sample X332	12092	11818	11887					N	20	0.0714399	0.0619836	0.0643561	-0.272269	-0.272269			N	20	0.0173559	0.0087506	0.0210397			-0.00215132	0
N	21	Sample X333	12694	12678	12528					N	21	0.0925512	0.0919841	0.0866832	-0.272269	-0.272269			N	21	0.0047396	-0.00622144	-0.000987274			-0.00274026	0
N	22	Sample X334	11613	11731	11689					N	22	0.0549698	0.0590007	0.057564	-0.272269	-0.272269			N	22	0.000885843	0.00576767	0.0142477			0.00122046	0
N	23	Sample X335	12560	12853	12556					N	23	0.0878116	0.0982055	0.0876705	-0.272269	-0.272269			N	23	0	0	0			0	0
N	24	Sample X336	11587	11562	11269					N	24	0.054084	0.053233	0.0433163	-0.272269	-0.272269			N	24	0	0	0			0	0
O	1	Sample X337	19315	19815	19791					O	1	0.359911	0.383149	0.382022	-0.272269	-0.272269			O	1	0.33826	0.369326	0.371325			0.00776649	0
O	2	Sample X338	16493	17104	16949					O	2	0.237386	0.262739	0.256249	-0.272269	-0.272269			O	2	0.189209	0.22285	0.218304			0.00841033	0
O	3	Sample X339	13295	13901	13268					O	3	0.1141	0.136321	0.113121	-0.272269	-0.272269			O	3	0.0924477	0.122498	0.102424			0.00751253	0
O	4	Sample X340	14175	14959	14381					O	4	0.146536	0.176358	0.154286	-0.272269	-0.272269			O	4	0.0983589	0.136469	0.116341			0.00952756	0
O	5	Sample X341	13291	13370	12727					O	5	0.113955	0.116823	0.093722	-0.272269	-0.272269			O	5	0.0923027	0.102999	0.0830246			0.00267414	0
O	6	Sample X342	12711	13809	12582					O	6	0.0931542	0.132915	0.0885882	-0.272269	-0.272269			O	6	0.0449772	0.0930265	0.0506432			0.0120123	0
O	7	Sample X343	11684	12189	11330					O	7	0.0573931	0.0748102	0.0453723	-0.272269	-0.272269			O	7	0.0357412	0.0609868	0.0346749			0.00631142	0
O	8	Sample X344	11788	12874	10959					O	8	0.0609539	0.0989548	0.0329372	-0.272269	-0.272269			O	8	0.012777	0.0590663	-0.00500779			0.0115723	0
O	9	Sample X345	12891	12904	12670					O	9	0.0995618	0.100026	0.0917006	-0.272269	-0.272269			O	9	0.0779098	0.0862028	0.0810032			0.00207325	0
O	10	Sample X346	11873	12355	11500					O	10	0.0638742	0.0806057	0.0511258	-0.272269	-0.272269			O	10	0.0156972	0.0407172	0.0131809			0.00625499	0
O	11	Sample X347	10719	10956	10864					O	11	0.0249802	0.0328373	0.0297794	-0.272269	-0.272269			O	11	0.0033283	0.0190139	0.019082			0.00392141	0
O	12	Sample X348	12312	12792	11766					O	12	0.0791011	0.0960323	0.0601996	-0.272269	-0.272269			O	12	0.0309241	0.0561438	0.0222546			0.00630492	0
O	13	Sample X349	11676	11732	11594					O	13	0.0571197	0.0590349	0.0543224	-0.272269	-0.272269			O	13	0.0354678	0.0452116	0.043625			0.00243593	0
O	14	Sample X350	10934	11453	10764					O	14	0.0321051	0.0495316	0.026467	-0.272269	-0.272269			O	14	-0.0160718	0.00964312	-0.011478			0.00642874	0
O	15	Sample X351	10518	10488	10466					O	15	0.0183683	0.0173855	0.0166654	-0.272269	-0.272269			O	15	-0.00328362	0.00356214	0.00596803			0.00171144	0
O	16	Sample X352	11136	11281	11063					O	16	0.0388492	0.0437204	0.0364064	-0.272269	-0.272269			O	16	-0.00932776	0.00383189	-0.00153858			0.00328991	0
O	17	Sample X353	11115	10926	11045					O	17	0.0381458	0.031839	0.035805	-0.272269	-0.272269			O	17	0.0164939	0.0180157	0.0251076			0.000380448	0
O	18	Sample X354	11193	11379	10975					O	18	0.0407611	0.047027	0.03347	-0.272269	-0.272269			O	18	-0.0074159	0.00713853	-0.00447491			0.00363861	0
O	19	Sample X355	10848	10638	10637					O	19	0.0292486	0.02231	0.0222771	-0.272269	-0.272269			O	19	0.0075967	0.0084867	0.0115797			0.000222499	0
O	20	Sample X356	11316	11466	11168					O	20	0.0449	0.0499723	0.0399221	-0.272269	-0.272269			O	20	-0.00327696	0.0100838	0.00197711			0.00334019	0
O	21	Sample X357	10582	10409	10452					O	21	0.0204685	0.0148024	0.0162075	-0.272269	-0.272269			O	21	-0.00118344	0.000979037	0.0055101			0.00054062	0
O	22	Sample X358	11275	11163	11063					O	22	0.0435183	0.0397543	0.0364064	-0.272269	-0.272269			O	22	-0.00465863	-0.000134168	-0.00153858			0.00113112	0
O	23	Sample X359	10618	10379	10283					O	23	0.0216519	0.0138233	0.0106974	-0.272269	-0.272269			O	23	0	0	0			0	0
O	24	Sample X360	11413	11167	11109					O	24	0.048177	0.0398885	0.0379449	-0.272269	-0.272269			O	24	0	0	0			0	0
P	1	Sample X361	6107	6110	5866					P	1								P	1	0	0	0				0			0	0
P	2	Sample X362	6398	6493	6221					P	2								P	2	0	0	0
P	3	Sample X363	6319	6180	6054					P	3								P	3	0	0	0				0			0	0
P	4	Sample X364	6550	6350	6355					P	4								P	4	0	0	0
P	5	Sample X365	6045	5989	5884					P	5								P	5	0	0	0				0			0	0
P	6	Sample X366	6698	6688	6470					P	6								P	6	0	0	0				0
P	7	Sample X367	6384	6307	6222					P	7								P	7	0	0	0				0			0	0
P	8	Sample X368	6501	6432	6312					P	8								P	8	0	0	0
P	9	Sample X369	6155	6206	6053					P	9								P	9	0	0	0				0			0	0
P	10	Sample X370	6726	6527	6428					P	10								P	10	0	0	0
P	11	Sample X371	6217	6163	6149					P	11								P	11	0	0	0				0			0	0
P	12	Sample X372	6822	6642	6589					P	12								P	12	0	0	0
P	13	Sample X373	5970	5688	5643					P	13								P	13	0	0	0				0			0	0
P	14	Sample X374	7278	7208	7111					P	14								P	14	0	0	0
P	15	Sample X375	6533	6403	6179					P	15								P	15	0	0	0				0			0	0
P	16	Sample X376	6866	6844	6719					P	16								P	16	0	0	0
P	17	Sample X377	6119	5995	5941					P	17								P	17	0	0	0
P	18	Sample X378	6866	6904	6690					P	18								P	18	0	0	0
P	19	Sample X379	5300	5771	5091					P	19								P	19	0	0	0
P	20	Sample X380	7373	7694	7567					P	20								P	20	0	0	0
P	21	Sample X381	7311	7206	7477					P	21								P	21	0	0	0
P	22	Sample X382	7722	7762	7624					P	22								P	22	0	0	0
P	23	Sample X383	6684	6711	6482					P	23								P	23	0	0	0
P	24	Sample X384	7877	7718	7615					P	24								P	24	0	0	0
[truncated: 12 more columns]
