# Supplementary material for: PDZ-directed substrate recruitment is the primary determinant of specific 4E-BP1 dephosphorylation by PP1-Neurabin
Source: eLife journal article supplement (doi:10.7554/elife.103403), 2024-11-20
Supplement: fig5-data1 [file replicate4.xlsx]

## Sheet: All Cycles
Well Row	Well Col	Content	Raw Data (425-10/460-20)	Raw Data (425-10/460-20)	Raw Data (425-10/460-20)				convert to phosphate	Well Row	Well Col	Raw Data (425-10/460-20)	Raw Data (425-10/460-20)	Raw Data (425-10/460-20)				normalize to the lasst column	Well Row	Well Col	Raw Data (425-10/460-20)	Raw Data (425-10/460-20)	Raw Data (425-10/460-20)								PP1-Neb 0.25 nM
		Time [s]	0	240	480							0	4	8							0	4	8								4ebp-pdz	4ebp-sgs	irsp53-pdz	irsp53-sgs	L5A-PDZ	L5A-SGS	V1	V2	V3	V4	V5	V6	V7	V8			4ebp-pdz	4ebp-sgs	irsp53-pdz
A	1	Sample X1	23150	35394	40860				0.551697	A	1	0.89213	2.58006	4.03083					A	1	0.284842	2.14779	3.62256		0.368695	0.417215	0			600	0.417215	0.00172255	0.0972133	0.0140686	0.0662328	0.0134738	0.0335025	0.0857974	0.417456	0.19131	0.854637	-0.0628284	0.164961	-0.00319279			0.366665	0.0993203	1.16206
A	2	Sample X2	17297	34731	38117					A	2	0.427195	2.44677	3.2122					A	2	-0.248053	1.93313	2.68527		0.188036	0.366665	0			300	0.0246384	0.20644	0.484114	0.0140512	0.0811636	0.0134781	0.0519303	0.0862427	-6.42789	0.0742864	-3.0931	30.7802	1.08149	0.284108			0.155672	0.0619683	0.690068
A	3	Sample X3	180	149	125					A	3	-0.410398	-0.41148	-0.412317					A	3	-1.01769	-0.843756	-0.820579		0.0057943	0.0246384	1			150	1.14202	0.0459154	4.1074	0.109048	-119.688	0.11195	0.914218	0.514666	1.83744	0.318403	0.844358	-13.5619	1.9966	0.0223594			0.25248	0.0409305	1.34804
A	4	Sample X4	10899	19976	25686					A	4	0.045773	0.623126	1.14283					A	4	-0.629475	0.10948	0.6159		0.126605	0.155672	0			75	1.15353	0.0527453	0.998249	0.0752673	5.43881	0.0923953	0.721272	0.416748	2.42071	0.367156	0.749398	-21.9386	1.73104	0.238989			0.0819308	0.0204479	1.34145
A	5	Sample X5	26454	43194	50129					A	5	1.22623	4.93782	10.1634					A	5	0.618938	4.50554	9.7551		1.31239	1.14202	0			37.5	0.767897	0.00170949	17.1929	0.131704	1.1723	0.0474681	0.726519	0.491547	1.05561	0.56401	1.70527	-56.6129	0.739872	0.280882			0.123946	0.0264859	1.32676
A	6	Sample X6	15443	28515	33273					A	6	0.305395	1.47014	2.17692					A	6	-0.369853	0.956499	1.64999		0.173373	0.25248	0			18.75	0.575793	0.00995435	4.46181	0.0632162	4.95867	0.0304438	0.490543	0.464212	0.983132	0.40179	1.29554	-8.13688	0.280368	0.410121			0.0747388	0.0206892	1.12724
A	7	Sample X7	26239	42559	50182					A	7	1.2025	4.66702	10.2317					A	7	0.595209	4.23474	9.82346		1.39718	1.15353	0			9.375	0.298777	-0.000275687	3.40283	0.0222802	2.63547	0.0195548	0.528291	0.0124193	-4.82041	0.363312	0.853513	5.01078	0.620807	0.311633			0.0238522	0.00562134	0.897483
A	8	Sample X8	11391	14941	19398					A	8	0.0715402	0.274141	0.578666					A	8	-0.603708	-0.239505	0.0517385		0.0728109	0.0819308	0			4.6875	0.164194	-0.0168443	1.42261	0.0229398	0.938146	0.0105021	0.360213	0.337802	0.314224	0.209751	0.610018	2.47056	0.274121	0.25573			-0.00180884	-0.00311593	0.94037
A	9	Sample X9	25495	41202	46934					A	9	1.12266	4.14964	7.06681					A	9	0.515375	3.71737	6.65855		0.735296	0.767897	0			2.34375	0.121651	-0.0192888	0.473091	0.0169219	0.386922	0.0145036	0.21693	0.171027	0.254587	0.177018	0.308752	0.729082	0.17247	0.147043			-0.00474668	0.00234089	0.331292
A	10	Sample X10	14348	21366	25097					A	10	0.238106	0.735492	1.08135					A	10	-0.437143	0.221846	0.554426		0.0831451	0.123946	0			1.17188	0.0572477	-0.00490906	0.269074	0.0122059	0.180076	0.0162633	0.114423	0.136499	0.10561	0.0741615	0.0868558	0.241083	0.0738847	0.0805293			0.00608583	-0.011276	0.149881
A	11	Sample X11	24667	37724	44267					A	11	1.03777	3.11142	5.44508					A	11	0.430481	2.67914	5.03682		0.589419	0.575793	0			0.585938	0.0385645	-0.0147385	0.130742	0.0232821	0.101199	0.0217282	0.073342	0.0754381	0.0468354	0.0360419	0.0438903	0.118443	0.0384987	0.0565316			0.00283521	-0.0125051	0.0709823
A	12	Sample X12	15324	18156	21509					A	12	0.297923	0.487286	0.747512					A	12	-0.377325	-0.0263597	0.220585		0.0617361	0.0747388	0			0	0	0	0	0	0	0	0	0	0	0	0	0	0	0			0	0	0
A	13	Sample X13	22835	33865	37496					A	13	0.86338	2.28286	3.05457					A	13	0.256091	1.85058	2.64631		0.198931	0.298777	0
A	14	Sample X14	18987	19858	19551					A	14	0.547814	0.613945	0.590311					A	14	-0.127434	0.1003	0.0633837		-0.009229	0.0238522	0				3	27	51	75	99	123	147	171	195	219	243	267	291	315	339		3	27	51
A	15	Sample X15	21679	29116	31438					A	15	0.761919	1.5474	1.87644					A	15	0.154631	1.11513	1.46818		0.0882639	0.164194	0				PP1-Neb 0.25 nM
A	16	Sample X16	17048	16307	14503					A	16	0.410225	0.36087	0.247434					A	16	-0.265023	-0.152776	-0.279494		-0.0316795	-0.00180884	0				4ebp-pdz	4ebp-sgs	irsp53-pdz	irsp53-sgs	L5A-PDZ	L5A-SGS	V1	V2	V3	V4	V5	V6	V7	V8			4ebp-pdz	4ebp-sgs	irsp53-pdz
A	17	Sample X17	18325	24589	26875					A	17	0.4994	1.02998	1.27358					A	17	-0.107888	0.5977	0.865323		0.0669057	0.121651	0		0	600	0.417215	na	na	na	na	na	na	0.0857974	0.417456	0.19131	0.854637	na	0.164961	-0.00319279			0.366665	0.0993203	na
A	18	Sample X18	17917	16402	15101					A	18	0.470321	0.367104	0.284026					A	18	-0.204928	-0.146542	-0.242901		-0.0240898	-0.00474668	0		2	300	na	0.20644	0.484114	na	na	na	na	0.0862427	na	0.0742864	na	na	na	0.284108			0.155672	0.0619683	0.690068
A	19	Sample X19	18760	20238	22006					A	19	0.531038	0.643705	0.789993					A	19	-0.0762506	0.211429	0.381731		0.0425756	0.0572477	0		4	150	1.14202	0.0459154	na	0.109048	na	0.11195	na	0.514666	na	0.318403	0.844358	na	na	0.0223594			0.25248	0.0409305	na
A	20	Sample X20	17615	16466	16133					A	20	0.449157	0.371319	0.349522					A	20	-0.226092	-0.142327	-0.177405		-0.00876958	0.00608583	0		6	75	1.15353	0.0527453	0.998249	0.0752673	na	0.0923953	0.721272	0.416748	na	0.367156	0.749398	na	na	0.238989			0.0819308	0.0204479	1.34145
A	21	Sample X21	18640	19027	20086					A	21	0.522244	0.55079	0.631733					A	21	-0.0850447	0.118513	0.223471		0.0262395	0.0385645	0		8	37.5	0.767897	na	na	0.131704	na	0.0474681	0.726519	0.491547	1.05561	0.56401	na	na	0.739872	0.280882			0.123946	0.0264859	1.32676
A	22	Sample X22	19208	18263	17464					A	22	0.564326	0.494945	0.438687					A	22	-0.110922	-0.0187013	-0.0882403		-0.0173848	0.00283521	0		10	18.75	0.575793	0.00995435	na	0.0632162	na	0.0304438	0.490543	0.464212	0.983132	0.40179	1.29554	na	0.280368	0.410121			0.0747388	0.0206892	1.12724
A	23	Sample X23	19772	17371	17019					A	23	0.607288	0.432276	0.408262					A	23	0	0	0		0	0	0		12	9.375	0.298777	-0.000275687	na	0.0222802	na	0.0195548	0.528291	na	na	0.363312	0.853513	na	0.620807	0.311633			0.0238522	0.00562134	0.897483
A	24	Sample X24	20633	18522	18704					A	24	0.675248	0.513646	0.526928					A	24	0	0	0		0	0	0		14	4.6875	0.164194	-0.0168443	1.42261	0.0229398	0.938146	0.0105021	0.360213	0.337802	0.314224	0.209751	0.610018	na	0.274121	0.25573			-0.00180884	-0.00311593	0.94037
B	1	Sample X25	98	104	101					B	1	-0.413258	-0.413049	-0.413154					B	1	-0.652324	-0.662598	-0.638544		0.0060137	0.00172255	1		16	2.34375	0.121651	-0.0192888	0.473091	0.0169219	0.386922	0.0145036	0.21693	0.171027	0.254587	0.177018	0.308752	0.729082	0.17247	0.147043			-0.00474668	0.00234089	0.331292
B	2	Sample X26	14483	19430	23453					B	2	0.246227	0.581094	0.920253					B	2	-0.235572	0.261906	0.55899		0.0742711	0.0993203	0		18	1.17188	0.0572477	-0.00490906	0.269074	0.0122059	0.180076	0.0162633	0.114423	0.136499	0.10561	0.0741615	0.0868558	0.241083	0.0738847	0.0805293			0.00608583	-0.011276	0.149881
B	3	Sample X27	31990	35523	39510					B	3	1.96269	2.60683	3.60054					B	3	1.72363	2.35729	3.37515		0.254465	0.20644	0		20	0.585938	0.0385645	-0.0147385	0.130742	0.0232821	0.101199	0.0217282	0.073342	0.0754381	0.0468354	0.0360419	0.0438903	0.118443	0.0384987	0.0565316			0.00283521	-0.0125051	0.0709823
B	4	Sample X28	14158	17414	19703					B	4	0.226757	0.435237	0.601968					B	4	-0.255042	0.116048	0.240705		0.0311641	0.0619683	0		22	0	0	0	0	0	0	0	0	0	0	0	0	0	0	0			0	0	0
B	5	Sample X29	11619	14752	17444					B	5	0.0836589	0.262553	0.437306					B	5	-0.155407	0.013004	0.211916		0.0497281	0.0459154	0
B	6	Sample X30	15613	16204	18651					B	6	0.31614	0.354142	0.523048					B	6	-0.165659	0.0349534	0.161785		0.0317078	0.0409305	0
B	7	Sample X31	13925	17466	19952					B	7	0.212968	0.438825	0.621254					B	7	-0.0260977	0.189276	0.395865		0.0516471	0.0527453	0
B	8	Sample X32	21376	21522	21883					B	8	0.73633	0.74861	0.779377					B	8	0.254531	0.429421	0.418114		-0.00282687	0.0204479	0
B	9	Sample X33	82	85	82					B	9	-0.413816	-0.413711	-0.413816					B	9	-0.652881	-0.66326	-0.639205		0.00601372	0.00170949	1
B	10	Sample X34	13473	13554	15003					B	10	0.186612	0.191297	0.277963					B	10	-0.295187	-0.127891	-0.0833001		0.0111478	0.0264859	0
B	11	Sample X35	15060	15547	16101					B	11	0.281486	0.311959	0.347445					B	11	0.0424208	0.0624096	0.122056		0.0149115	0.00995435	0
B	12	Sample X36	13660	13011	14420					B	12	0.197454	0.160197	0.242431					B	12	-0.284345	-0.158991	-0.118832		0.0100398	0.0206892	0
B	13	Sample X37	5787	5091	5411					B	13	-0.19428	-0.223506	-0.210161					B	13	-0.433346	-0.473055	-0.435551		0.00937603	-0.000275687	0
B	14	Sample X38	14481	13125	13193					B	14	0.246106	0.166667	0.170541					B	14	-0.235693	-0.152522	-0.190722		-0.00955012	0.00562134	0
B	15	Sample X39	15759	13296	13306					B	15	0.325433	0.17643	0.177003					B	15	0.0863678	-0.0731188	-0.0483863		0.00618313	-0.0168443	0
B	16	Sample X40	15458	13821	13023					B	16	0.30634	0.206858	0.160877					B	16	-0.175459	-0.11233	-0.200386		-0.022014	-0.00311593	0
B	17	Sample X41	16211	14018	13473					B	17	0.354598	0.218455	0.186612					B	17	0.115533	-0.031094	-0.0387777		-0.00192091	-0.0192888	0
B	18	Sample X42	15966	14640	14328					B	18	0.338716	0.255732	0.236907					B	18	-0.143084	-0.0634566	-0.124356		-0.015225	0.00234089	0
B	19	Sample X43	15011	13657	14137					B	19	0.278457	0.197279	0.225509					B	19	0.0393913	-0.0522701	0.000118849		0.0130972	-0.00490906	0
B	20	Sample X44	16547	14224	13112					B	20	0.376671	0.230689	0.165927					B	20	-0.105128	-0.0885	-0.195336		-0.026709	-0.011276	0
B	21	Sample X45	15739	14889	13576					B	21	0.324157	0.270943	0.192573					B	21	0.0850911	0.0213937	-0.0328169		-0.0135527	-0.0147385	0
B	22	Sample X46	18126	14838	14785					B	22	0.485146	0.267814	0.264569					B	22	0.00334682	-0.0513749	-0.0966938		-0.0113297	-0.0125051	0
B	23	Sample X47	14364	14538	14135					B	23	0.239066	0.249549	0.22539					B	23	0	0	0		0	0	0
B	24	Sample X48	18079	15661	16313					B	24	0.481799	0.319189	0.361263					B	24	0	0	0		0	0	0
C	1	Sample X49	106548	119768	122843					C	1	-5.1854	-4.59142	-4.48908					C	1	-5.46553	-4.8647	-4.68782		0.0442201	0.0972133	1
C	2	Sample X50	50244	51773	54314					C	2	10.3126	12.6939	19.4838					C	2	9.87069	12.4284	19.1672		1.6847	1.16206	1
C	3	Sample X51	41447	46916	48128					C	3	4.23745	7.05365	8.02898					C	3	3.95733	6.78037	7.83024		0.262467	0.484114	0
C	4	Sample X52	39913	46779	49241					C	4	3.72293	6.95466	9.11818					C	4	3.28099	6.68917	8.80153		0.528091	0.690068	0
C	5	Sample X53	43574	54176	56905					C	5	5.10989	18.9629	37.8877					C	5	4.82976	18.6896	37.689		4.74984	4.1074	1
C	6	Sample X54	39671	49965	52563					C	6	3.64885	9.9564	14.3079					C	6	3.20691	9.69092	13.9912		1.07507	1.34804	1
C	7	Sample X55	36174	47406	50495					C	7	2.74637	7.42536	10.651					C	7	2.46624	7.15208	10.4522		0.825039	0.998249	0
C	8	Sample X56	33736	48357	51865					C	8	2.25937	8.23606	12.8657					C	8	1.81743	7.97058	12.5491		1.14462	1.34145	0
C	9	Sample X57	60876	79729	83890					C	9	-145.194	-8.83585	-7.73231					C	9	-145.474	-9.10913	-7.93105		0.29452	17.1929	1
C	10	Sample X58	29299	47562	51415					C	10	1.57153	7.54985	12.0603					C	10	1.12959	7.28436	11.7436		1.11482	1.32676	0
C	11	Sample X59	38053	51566	56974					C	11	3.19554	12.321	38.8087					C	11	2.91541	12.0477	38.6099		6.64056	4.46181	1
C	12	Sample X60	29581	46047	50386					C	12	1.60927	6.45865	10.5019					C	12	1.16734	6.19316	10.1852		0.998016	1.12724	0
C	13	Sample X61	35729	48220	56129					C	13	2.65018	8.11121	29.7914					C	13	2.37005	7.83793	29.5927		5.43868	3.40283	1
C	14	Sample X62	26199	39090	48375					C	14	1.19812	3.478	8.25269					C	14	0.756178	3.21251	7.93604		1.18088	0.897483	0
C	15	Sample X63	29029	42045	51849					C	15	1.53603	4.46185	12.8355					C	15	1.25591	4.18857	12.6368		2.11206	1.42261	0
C	16	Sample X64	23472	38835	48447					C	16	0.922032	3.40598	8.3197					C	16	0.480095	3.14049	8.00305		1.21564	0.94037	0
C	17	Sample X65	23675	36572	42504					C	17	0.941156	2.8355	4.64449					C	17	0.661031	2.56222	4.44576		0.470885	0.473091	0
C	18	Sample X66	21727	32059	38415					C	18	0.76601	1.97371	3.29106					C	18	0.324072	1.70823	2.97441		0.316546	0.331292	0
C	19	Sample X67	21482	30652	36488					C	19	0.745236	1.75923	2.81643					C	19	0.465111	1.48596	2.6177		0.282936	0.269074	0
C	20	Sample X68	16824	21784	28505					C	20	0.395127	0.770881	1.46888					C	20	-0.046811	0.505395	1.15224		0.16171	0.149881	0
C	21	Sample X69	20027	27985	29450					C	21	0.627111	1.40442	1.59165					C	21	0.346985	1.13114	1.39292		0.0654443	0.130742	0
C	22	Sample X70	19195	20564	24346					C	22	0.56335	0.669693	1.00592					C	22	0.121412	0.404206	0.68927		0.0712661	0.0709823	0
C	23	Sample X71	15038	14927	13682					C	23	0.280125	0.273279	0.198735					C	23	0	0	0		0	0	0
C	24	Sample X72	17511	14800	15621					C	24	0.441938	0.265487	0.316648					C	24	0	0	0		0	0	0
D	1	Sample X73	227	229	225					D	1	-0.408755	-0.408685	-0.408825					D	1	-0.72788	-0.653886	-0.615331		0.00963875	0.0140686	1
D	2	Sample X74	44086	52194	55838					D	2	5.35472	13.5133	27.5336					D	2	4.97467	13.2799	27.2579		3.4945	2.7854	1
D	3	Sample X75	127	127	121					D	3	-0.412248	-0.412248	-0.412457					D	3	-0.731373	-0.657449	-0.618963		0.00962144	0.0140512	1
D	4	Sample X76	59836	75091	79185					D	4	759.695	-10.7831	-9.01551					D	4	759.315	-11.0165	-9.29125		0.431317	-96.0758	1
D	5	Sample X77	22845	26545	29690					D	5	0.864285	1.23636	1.62405					D	5	0.54516	0.991161	1.41755		0.106596	0.109048	0
D	6	Sample X78	34028	46668	52058					D	6	2.31288	6.87594	13.2391					D	6	1.93282	6.6425	12.9634		1.58022	1.37882	1
D	7	Sample X79	21407	23892	26474					D	7	0.738929	0.961837	1.22845					D	7	0.419804	0.716635	1.02194		0.0763269	0.0752673	0
D	8	Sample X80	33669	50323	50657					D	8	2.24726	10.4172	10.879					D	8	1.8672	10.1838	10.6033		0.104867	1.09201	0
D	9	Sample X81	22405	27391	30698					D	9	0.82491	1.3333	1.76592					D	9	0.505785	1.0881	1.55941		0.117829	0.131704	0
D	10	Sample X82	27665	47387	52192					D	10	1.36578	7.41041	13.5092					D	10	0.985729	7.17697	13.2335		1.51413	1.53097	1
D	11	Sample X83	17001	20432	22123					D	11	0.407044	0.659118	0.800156					D	11	0.0879194	0.413917	0.593649		0.0449331	0.0632162	0
D	12	Sample X84	27929	44800	45907					D	12	1.3976	5.72368	6.36965					D	12	1.01755	5.49025	6.09391		0.150915	0.634545	0
D	13	Sample X85	16144	15208	17131					D	13	0.350237	0.290677	0.41586					D	13	0.0311122	0.0454755	0.209354		0.0409695	0.0222802	0
D	14	Sample X86	23107	40937	47381					D	14	0.888177	4.05721	7.4057					D	14	0.508125	3.82377	7.12996		0.826546	0.827729	0
D	15	Sample X87	13775	14663	14956					D	15	0.204164	0.25713	0.275064					D	15	-0.114961	0.0119286	0.0685579		0.0141573	0.0229398	0
D	16	Sample X88	24043	38271	47770					D	16	0.976375	3.25268	7.72077					D	16	0.596323	3.01925	7.44503		1.10645	0.856088	0
D	17	Sample X89	13760	14520	14146					D	17	0.203287	0.248461	0.226044					D	17	-0.115838	0.00325947	0.0195371		0.0040694	0.0169219	0
D	18	Sample X90	21842	32814	38952					D	18	0.775853	2.09795	3.43881					D	18	0.395801	1.86452	3.16306		0.324636	0.345908	0
D	19	Sample X91	14437	14426	14187					D	19	0.243454	0.242792	0.228483					D	19	-0.0756708	-0.00240945	0.0219767		0.00609655	0.0122059	0
D	20	Sample X92	18416	24617	31976					D	20	0.505964	1.03277	1.96046					D	20	0.125912	0.799335	1.68472		0.221346	0.194851	0
D	21	Sample X93	13611	14401	14845					D	21	0.194604	0.241288	0.268243					D	21	-0.124521	-0.0039132	0.0617363		0.0164124	0.0232821	0
D	22	Sample X94	18835	20876	25282					D	22	0.53656	0.69497	1.10044					D	22	0.156509	0.461534	0.824696		0.0907903	0.0835234	0
D	23	Sample X95	15660	14466	13815					D	23	0.319125	0.245201	0.206506					D	23	0	0	0		0	0	0
D	24	Sample X96	16598	14270	14967					D	24	0.380052	0.233435	0.275742					D	24	0	0	0		0	0	0
E	1	Sample X97	119968	135596	138593					E	1	-4.58445	-4.15353	-4.09047					E	1	-4.79025	-4.27594	-4.26039		0.00388881	0.0662328	1
E	2	Sample X98	37580	43407	45927					E	2	3.07538	5.0333	6.38226					E	2	2.77338	4.86504	6.19547		0.332609	0.427761	0
E	3	Sample X99	116889	134179	138922					E	3	-4.69726	-4.18511	-4.08384					E	3	-4.90306	-4.30753	-4.25376		0.0134429	0.0811636	1
E	4	Sample X100	25964	30895	31729					E	4	1.17258	1.79479	1.92149					E	4	0.870582	1.62653	1.73471		0.0270431	0.108016	0
E	5	Sample X101	48173	58263	60132					E	5	8.06904	69.4632	-949.47					E	5	7.86323	69.3407	-949.64		-254.745	-119.688	1
E	6	Sample X102	39664	51381	55165					E	6	3.64673	12.0028	23.3532					E	6	3.34474	11.8346	23.1664		2.83295	2.4777	1
E	7	Sample X103	40961	54146	57502					E	7	4.06547	18.8529	47.54					E	7	3.85967	18.7305	47.3701		7.1599	5.43881	1
E	8	Sample X104	34062	47595	52252					E	8	2.31918	7.57658	13.6332					E	8	2.01718	7.40832	13.4464		1.50952	1.42865	1
E	9	Sample X105	70075	93781	100790					E	9	-14.9069	-6.2003	-5.56448					E	9	-15.1128	-6.32272	-5.73439		0.147082	1.1723	1
E	10	Sample X106	26407	42571	49639					E	10	1.22101	4.67195	9.56447					E	10	0.919014	4.50369	9.37769		1.2185	1.05733	0
E	11	Sample X107	38342	52066	57247					E	11	3.27154	13.255	42.905					E	11	3.06574	13.1326	42.7351		7.40063	4.95867	1
E	12	Sample X108	20735	30245	38042					E	12	0.683497	1.70097	3.19269					E	12	0.381497	1.53271	3.0059		0.368297	0.32805	0
E	13	Sample X109	35158	51070	55207					E	13	2.5318	11.4978	23.5797					E	13	2.326	11.3753	23.4098		3.00861	2.63547	1
E	14	Sample X110	17729	22098	29961					E	14	0.45711	0.797979	1.66126					E	14	0.155111	0.629718	1.47447		0.211188	0.16492	0
E	15	Sample X111	29155	43605	49151					E	15	1.55252	5.12428	9.0218					E	15	1.34672	5.00186	8.85189		0.962506	0.938146	0
E	16	Sample X112	16256	20137	25306					E	16	0.357535	0.63574	1.10293					E	16	0.0555352	0.467479	0.916143		0.112166	0.107576	0
E	17	Sample X113	23352	35442	40681					E	17	0.910827	2.58999	3.97031					E	17	0.705024	2.46758	3.8004		0.333206	0.386922	0
E	18	Sample X114	15830	15966	19000					E	18	0.329975	0.338716	0.54878					E	18	0.0279756	0.170455	0.361995		0.047885	0.0417524	0
E	19	Sample X115	18788	25654	31833					E	19	0.533097	1.13943	1.93782					E	19	0.327294	1.01702	1.7679		0.187721	0.180076	0
E	20	Sample X116	12860	13798	15618					E	20	0.151676	0.205511	0.316457					E	20	-0.150324	0.0372501	0.129672		0.0231054	0.0349994	0
E	21	Sample X117	16092	19751	25475					E	21	0.346862	0.605667	1.12056					E	21	0.141058	0.483253	0.950652		0.11685	0.101199	0
E	22	Sample X118	14911	13638	15747					E	22	0.272295	0.196174	0.324667					E	22	-0.0297047	0.0279131	0.137882		0.0274922	0.0209483	0
E	23	Sample X119	13803	12334	13182					E	23	0.205803	0.122414	0.169913					E	23	0	0	0		0	0	0
E	24	Sample X120	15389	13153	13476					E	24	0.302	0.168261	0.186785					E	24	0	0	0		0	0	0
F	1	Sample X121	138	138	133					F	1	-0.411864	-0.411864	-0.412038					F	1	-0.621069	-0.552337	-0.513279		0.00976463	0.0134738	1
F	2	Sample X122	51705	54073	55053					F	2	12.5693	18.5899	22.7678					F	2	11.6482	17.7678	21.82		1.01307	1.27148	1
F	3	Sample X123	113	112	109					F	3	-0.412736	-0.412771	-0.412875					F	3	-0.62194	-0.553244	-0.514115		0.00978209	0.0134781	1
F	4	Sample X124	72353	80528	80544					F	4	-12.619	-8.58924	-8.5845					F	4	-13.5401	-9.41141	-9.5323		-0.0302218	0.500974	1
F	5	Sample X125	26657	29999	32446					F	5	1.24891	1.66653	2.03655					F	5	1.03971	1.52605	1.93531		0.102313	0.11195	0
F	6	Sample X126	41034	50055	52057					F	6	4.09074	10.0691	13.2371					F	6	3.16965	9.24696	12.2893		0.760592	1.13996	1
F	7	Sample X127	21082	24899	27474					F	7	0.711881	1.06115	1.34308					F	7	0.502677	0.920679	1.24184		0.08029	0.0923953	0
F	8	Sample X128	36222	45818	48991					F	8	2.75696	6.31399	8.85435					F	8	1.83586	5.49182	7.90655		0.603682	0.758835	0
F	9	Sample X129	18561	20733	21986					F	9	0.516482	0.683335	0.788262					F	9	0.307277	0.542861	0.687022		0.0360401	0.0474681	0
F	10	Sample X130	25426	37918	46224					F	10	1.11543	3.16072	6.57375					F	10	0.194338	2.33855	5.62595		0.821851	0.678952	0
F	11	Sample X131	15545	16753	17590					F	11	0.311832	0.390374	0.447418					F	11	0.102627	0.249901	0.346178		0.0240693	0.0304438	0
F	12	Sample X132	22522	29392	34841					F	12	0.83529	1.5839	2.4684					F	12	-0.0858058	0.761729	1.5206		0.189718	0.200801	0
F	13	Sample X133	14063	15030	14867					F	13	0.221118	0.279631	0.269592					F	13	0.0119133	0.139158	0.168352		0.00729853	0.0195548	0
F	14	Sample X134	17197	22423	25520					F	14	0.420356	0.826503	1.12529					F	14	-0.50074	0.00433207	0.17749		0.0432894	0.0847787	0
F	15	Sample X135	12839	13125	12409					F	15	0.150495	0.166667	0.126547					F	15	-0.0587097	0.0261935	0.0253068		-0.000221682	0.0105021	0
F	16	Sample X136	14529	17841	23594					F	16	0.249005	0.464966	0.9335					F	16	-0.672091	-0.357205	-0.0143003		0.0857261	0.0822238	0
F	17	Sample X137	12355	13010	12501					F	17	0.12357	0.16014	0.131634					F	17	-0.0856346	0.0196673	0.0303941		0.0026817	0.0145036	0
F	18	Sample X138	14607	14931	18308					F	18	0.253729	0.273525	0.498177					F	18	-0.667367	-0.548646	-0.449623		0.0247557	0.027218	0
F	19	Sample X139	12399	11688	12797					F	19	0.125995	0.0873489	0.148137					F	19	-0.0832095	-0.0531243	0.0468965		0.0250052	0.0162633	0
F	20	Sample X140	13599	13944	14080					F	20	0.193907	0.214087	0.222125					F	20	-0.727188	-0.608084	-0.725675		-0.0293978	0.00018919	0
F	21	Sample X141	11775	12602	12970					F	21	0.0920166	0.137242	0.157878					F	21	-0.117188	-0.0032311	0.0566377		0.0149672	0.0217282	0
F	22	Sample X142	14287	13744	14736					F	22	0.234452	0.202352	0.261577					F	22	-0.686644	-0.619819	-0.686224		-0.0166013	5.25205e-05	0
F	23	Sample X143	13861	12660	11946					F	23	0.209205	0.140473	0.10124					F	23	0	0	0		0	0	0
F	24	Sample X144	23462	22374	23745					F	24	0.921096	0.822171	0.9478					F	24	0	0	0		0	0	0
G	1	Sample X145	115386	122695	122096					G	1	-4.75689	-4.49378	-4.51301					G	1	-4.787	-4.48228	-4.51898		-0.00917345	0.0335025	1
G	2	Sample X146	38344	43389	43224					G	2	3.27207	5.02513	4.95112					G	2	3.20434	4.97396	4.94118		-0.00819401	0.217106	0
G	3	Sample X147	115330	126720	126921					G	3	-4.75917	-4.3735	-4.36787					G	3	-4.78928	-4.362	-4.37384		-0.00295849	0.0519303	1
G	4	Sample X148	39286	45131	45307					G	4	3.53457	5.90675	6.00745					G	4	3.46683	5.85558	5.99751		0.0354844	0.316336	0
G	5	Sample X149	45310	52992	52088					G	5	6.00919	15.3368	13.2988					G	5	5.97908	15.3483	13.2928		-0.513858	0.914218	1
G	6	Sample X150	38932	47408	47267					G	6	3.43317	7.42694	7.31701					G	6	3.36543	7.37576	7.30707		-0.0171724	0.492705	0
G	7	Sample X151	45449	50828	51281					G	7	6.09047	11.1284	11.8365					G	7	6.06037	11.1399	11.8305		0.172653	0.721272	0
G	8	Sample X152	33688	45661	44899					G	8	2.25068	6.21748	5.7776					G	8	2.18295	6.16631	5.76766		-0.0996623	0.448089	0
G	9	Sample X153	39704	47169	49537					G	9	3.65885	7.24203	9.44686					G	9	3.62874	7.25353	9.4409		0.546842	0.726519	0
G	10	Sample X154	26875	40277	40662					G	10	1.27358	3.83778	3.96396					G	10	1.20585	3.7866	3.95402		0.041854	0.343521	0
G	11	Sample X155	37081	45345	46637					G	11	2.95399	6.02951	6.85419					G	11	2.92388	6.04101	6.84822		0.201803	0.490543	0
G	12	Sample X156	23215	34087	35920					G	12	0.898124	2.32383	2.69103					G	12	0.830387	2.27266	2.68109		0.102108	0.231338	0
G	13	Sample X157	32683	40293	45760					G	13	2.07591	3.84292	6.27809					G	13	2.0458	3.85442	6.27213		0.604426	0.528291	0
G	14	Sample X158	16809	25360	31590					G	14	0.394121	1.10855	1.89986					G	14	0.326385	1.05737	1.88992		0.208138	0.195442	0
G	15	Sample X159	30341	39790	42325					G	15	1.71457	3.68506	4.57214					G	15	1.68446	3.69655	4.56617		0.217404	0.360213	0
G	16	Sample X160	13321	19058	23641					G	16	0.177864	0.5531	0.937938					G	16	0.110127	0.501923	0.927999		0.106519	0.102234	0
G	17	Sample X161	23318	32036	35581					G	17	0.907666	1.97003	2.61896					G	17	0.877558	1.98153	2.613		0.157868	0.21693	0
G	18	Sample X162	11428	14687	16591					G	18	0.0734991	0.25859	0.379587					G	18	0.00576224	0.207414	0.369648		0.0405585	0.0454857	0
G	19	Sample X163	17921	24722	27632					G	19	0.470603	1.04328	1.36184					G	19	0.440495	1.05478	1.35587		0.0752733	0.114423	0
G	20	Sample X164	11574	12413	15014					G	20	0.081258	0.126768	0.278642					G	20	0.0135211	0.0755912	0.268703		0.0482779	0.0318977	0
G	21	Sample X165	15387	20358	22847					G	21	0.301874	0.653221	0.864466					G	21	0.271766	0.664718	0.858502		0.0484459	0.073342	0
G	22	Sample X166	12421	11333	14188					G	22	0.127209	0.0684756	0.228543					G	22	0.0594726	0.017299	0.218603		0.0503261	0.0198913	0
G	23	Sample X167	10595	9769	10119					G	23	0.0301083	-0.0114969	0.00596419					G	23	0	0	0		0	0	0
G	24	Sample X168	11319	11003	10198					G	24	0.0677369	0.0511766	0.00993936					G	24	0	0	0		0	0	0
H	1	Sample X169	12425	17915	21114					H	1	0.12743	0.470179	0.714525					H	1	-0.212962	0.224073	0.473417		0.0623358	0.0857974	0
H	2	Sample X170	18735	27793	33733					H	2	0.529202	1.38114	2.25882					H	2	0.120669	1.03175	1.95739		0.231409	0.22959	0
H	3	Sample X171	11828	17478	20760					H	3	0.0948684	0.439655	0.685525					H	3	-0.245524	0.193549	0.444417		0.0627171	0.0862427	0
H	4	Sample X172	14757	20031	23761					H	4	0.262858	0.627424	0.949323					H	4	-0.145674	0.278031	0.647888		0.0924642	0.0991953	0
H	5	Sample X173	19688	34080	42441					H	5	0.600814	2.32253	4.61886					H	5	0.260421	2.07642	4.37775		0.575331	0.514666	0
H	6	Sample X174	19355	28063	34359					H	6	0.575409	1.41396	2.375					H	6	0.166877	1.06456	2.07357		0.252252	0.238337	0
H	7	Sample X175	21793	34607	40788					H	7	0.771652	2.42262	4.00635					H	7	0.431259	2.17651	3.76524		0.397183	0.416748	0
H	8	Sample X176	17088	22874	27455					H	8	0.412938	0.866913	1.34084					H	8	0.00440564	0.51752	1.0394		0.13047	0.129374	0
H	9	Sample X177	22093	33736	42470					H	9	0.797544	2.25937	4.63063					H	9	0.457151	2.01326	4.38953		0.594066	0.491547	0
H	10	Sample X178	15727	18906	21442					H	10	0.323391	0.541807	0.741869					H	10	-0.0851412	0.192414	0.440435		0.0620052	0.065697	0
H	11	Sample X179	21968	35241	41887					H	11	0.786706	2.54867	4.40112					H	11	0.446313	2.30256	4.16001		0.464362	0.464212	0
H	12	Sample X180	17240	19672	20048					H	12	0.423293	0.599583	0.628755					H	12	0.0147603	0.250191	0.32732		0.0192823	0.03907	0
H	13	Sample X181	88	92	90					H	13	-0.413607	-0.413467	-0.413537					H	13	-0.753999	-0.659573	-0.654645		0.00123213	0.0124193	1
H	14	Sample X182	16340	15816	17094					H	14	0.363033	0.329078	0.413345					H	14	-0.0454999	-0.0203141	0.111911		0.0330563	0.0196764	0
H	15	Sample X183	24508	34014	39592					H	15	1.02192	2.31028	3.62505					H	15	0.681528	2.06418	3.38394		0.329941	0.337802	0
H	16	Sample X184	17128	15166	15773					H	16	0.415656	0.288063	0.326328					H	16	0.00712344	-0.0613299	0.0248935		0.0215558	0.00222125	0
H	17	Sample X185	17505	25790	30312					H	17	0.441523	1.1539	1.71046					H	17	0.10113	0.907796	1.46935		0.140388	0.171027	0
H	18	Sample X186	18467	14683	15172					H	18	0.509655	0.258347	0.288436					H	18	0.101123	-0.0910458	-0.0129985		0.0195118	-0.0142651	0
H	19	Sample X187	20839	26079	30129					H	19	0.691951	1.18503	1.68466					H	19	0.351559	0.938927	1.44355		0.126157	0.136499	0
H	20	Sample X188	17229	15424	14903					H	20	0.422541	0.3042	0.271803					H	20	0.0140085	-0.0451929	-0.0296313		0.0038904	-0.00545498	0
H	21	Sample X189	17451	20932	23684					H	21	0.437789	0.69955	0.942009					H	21	0.0973967	0.453443	0.700901		0.0618644	0.0754381	0
H	22	Sample X190	19592	17896	16942					H	22	0.593447	0.468839	0.403061					H	22	0.184914	0.119447	0.101627		-0.00445498	-0.010411	0
H	23	Sample X191	15992	14481	14398					H	23	0.340393	0.246106	0.241108					H	23	0	0	0		0	0	0
H	24	Sample X192	17023	16131	15380					H	24	0.408532	0.349393	0.301434					H	24	0	0	0		0	0	0
I	1	Sample X193	28556	38190	43001					I	1	1.47532	3.23132	4.85337					I	1	1.27262	2.97279	4.61227		0.40987	0.417456	0
I	2	Sample X194	16113	21974	25061					I	2	0.348224	0.787225	1.07766					I	2	-0.0240188	0.569183	0.804939		0.0589389	0.10362	0
I	3	Sample X195	38061	54926	62736					I	3	3.19762	22.1354	-48.1871					I	3	2.99491	21.8769	-48.4282		-17.5763	-6.42789	1
I	4	Sample X196	24703	36860	42989					I	4	1.04138	2.9019	4.84819					I	4	0.669135	2.68386	4.57546		0.4729	0.488291	0
I	5	Sample X197	35339	48337	53689					I	5	2.56873	8.21765	17.3067					I	5	2.36603	7.95912	17.0656		2.27661	1.83744	1
I	6	Sample X198	22966	34539	39737					I	6	0.875277	2.40947	3.66888					I	6	0.503034	2.19143	3.39615		0.301181	0.36164	0
I	7	Sample X199	35927	49338	54918					I	7	2.69254	9.22388	22.0966					I	7	2.48984	8.96535	21.8555		3.22254	2.42071	1
I	8	Sample X200	19610	27830	32075					I	8	0.594825	1.38561	1.97628					I	8	0.222583	1.16757	1.70355		0.133996	0.185121	0
I	9	Sample X201	30631	44173	50188					I	9	1.75619	5.3979	10.2395					I	9	1.55349	5.13937	9.99839		1.21476	1.05561	0
I	10	Sample X202	18312	23426	26307					I	10	0.498465	0.917728	1.20997					I	10	0.126222	0.699687	0.937244		0.0593893	0.101378	0
I	11	Sample X203	29389	42168	49572					I	11	1.5835	4.50987	9.48696					I	11	1.3808	4.25134	9.24585		1.24863	0.983132	0
I	12	Sample X204	16408	18038	22172					I	12	0.367499	0.478886	0.804431					I	12	-0.00474402	0.260844	0.531705		0.0677152	0.0670562	0
I	13	Sample X205	34034	54115	63708					I	13	2.31399	18.7404	-36.2109					I	13	2.11128	18.4819	-36.452		-13.7335	-4.82041	1
I	14	Sample X206	16095	16144	16819					I	14	0.347056	0.350237	0.394792					I	14	-0.0251865	0.132196	0.122066		-0.00253236	0.0184066	0
I	15	Sample X207	23136	36778	38967					I	15	0.890842	2.88283	3.44304					I	15	0.688139	2.6243	3.20193		0.144409	0.314224	0
I	16	Sample X208	16216	15010	16309					I	16	0.354924	0.278395	0.361001					I	16	-0.0173185	0.0603539	0.0882759		0.00698048	0.0131993	0
I	17	Sample X209	26354	29693	38412					I	17	1.21515	1.62446	3.29025					I	17	1.01245	1.36593	3.04915		0.420804	0.254587	0
I	18	Sample X210	16705	15481	15037					I	18	0.387169	0.30779	0.280064					I	18	0.0149268	0.0897487	0.00733835		-0.0206026	-0.000948553	0
I	19	Sample X211	21067	22990	29467					I	19	0.710644	0.877466	1.59393					I	19	0.507941	0.618936	1.35282		0.183472	0.10561	0
I	20	Sample X212	17157	14975	14420					I	20	0.417629	0.276235	0.242431					I	20	0.0453868	0.0581942	-0.0302944		-0.0221221	-0.00946015	0
I	21	Sample X213	18474	19062	23485					I	21	0.510162	0.553398	0.923251					I	21	0.30746	0.294868	0.682143		0.0968186	0.0468354	0
I	22	Sample X214	16407	14100	14172					I	22	0.367433	0.223312	0.22759					I	22	-0.0048098	0.00527028	-0.0451351		-0.0126014	-0.00504067	0
I	23	Sample X215	13750	14686	14398					I	23	0.202703	0.258529	0.241108					I	23	0	0	0		0	0	0
I	24	Sample X216	16480	14011	14918					I	24	0.372243	0.218041	0.272725					I	24	0	0	0		0	0	0
J	1	Sample X217	24106	31552	35127					J	1	0.982476	1.89398	2.52553					J	1	0.803752	1.71118	2.33423		0.155764	0.19131	0
J	2	Sample X218	30492	42880	50408					J	2	1.73614	4.8014	10.5317					J	2	1.42342	4.49689	10.2995		1.45064	1.1095	0
J	3	Sample X219	14044	19282	22427					J	3	0.219993	0.569895	0.826857					J	3	0.0412685	0.387089	0.63556		0.0621177	0.0742864	0
J	4	Sample X220	19399	27741	32177					J	4	0.578742	1.37489	1.99269					J	4	0.266024	1.07037	1.76045		0.172518	0.186803	0
J	5	Sample X221	28237	37375	40755					J	5	1.4354	3.02486	3.99519					J	5	1.25667	2.84206	3.8039		0.24046	0.318403	0
J	6	Sample X222	18020	23911	29688					J	6	0.477608	0.963659	1.62378					J	6	0.16489	0.659145	1.39154		0.183098	0.153331	0
J	7	Sample X223	28374	36909	41890					J	7	1.45244	2.91336	4.40226					J	7	1.27372	2.73056	4.21097		0.370102	0.367156	0
J	8	Sample X224	15296	19305	24527					J	8	0.29617	0.57163	1.02381					J	8	-0.0165476	0.267116	0.791566		0.131113	0.101014	0
J	9	Sample X225	27185	36529	45001					J	9	1.30923	2.82572	5.83389					J	9	1.13051	2.64291	5.64259		0.749919	0.56401	0
J	10	Sample X226	14945	16412	19120					J	10	0.274387	0.367762	0.55773					J	10	-0.0383311	0.0632476	0.32549		0.0655605	0.0454776	0
J	11	Sample X227	25671	33427	41800					J	11	1.14124	2.20402	4.36813					J	11	0.962512	2.02122	4.17683		0.538904	0.40179	0
J	12	Sample X228	13556	14761	17373					J	12	0.191413	0.263103	0.432414					J	12	-0.121305	-0.0414115	0.200173		0.0603962	0.0401847	0
J	13	Sample X229	20710	34527	39510					J	13	0.681471	2.40716	3.60054					J	13	0.502747	2.22435	3.40924		0.296222	0.363312	0
J	14	Sample X230	14010	13335	14512					J	14	0.217982	0.178667	0.247977					J	14	-0.0947358	-0.125847	0.0157371		0.035396	0.0138091	0
J	15	Sample X231	19615	25960	33881					J	15	0.595209	1.17215	2.28579					J	15	0.416484	0.989344	2.09449		0.276287	0.209751	0
J	16	Sample X232	15344	13080	15111					J	16	0.299176	0.164109	0.284647					J	16	-0.0135421	-0.140405	0.0524061		0.0482028	0.00824352	0
J	17	Sample X233	17854	21803	31556					J	17	0.465881	0.772508	1.8946					J	17	0.287156	0.589702	1.7033		0.2784	0.177018	0
J	18	Sample X234	16467	13666	14700					J	18	0.371385	0.197803	0.259382					J	18	0.0586669	-0.106711	0.0271415		0.0334632	-0.00394068	0
J	19	Sample X235	17893	18567	25030					J	19	0.468628	0.516919	1.07449					J	19	0.289903	0.334112	0.883195		0.137271	0.0741615	0
J	20	Sample X236	16016	14408	14046					J	20	0.341943	0.241709	0.220111					J	20	0.0292245	-0.0628051	-0.012129		0.012669	-0.0051692	0
J	21	Sample X237	16502	17580	20625					J	21	0.373695	0.446723	0.674603					J	21	0.194971	0.263917	0.483306		0.0548472	0.0360419	0
J	22	Sample X238	15673	15607	15534					J	22	0.319952	0.315759	0.311137					J	22	0.00723374	0.0112451	0.0788962		0.0169128	0.0089578	0
J	23	Sample X239	13336	13407	13554					J	23	0.178724	0.182806	0.191297					J	23	0	0	0		0	0	0
J	24	Sample X240	15559	15429	14250					J	24	0.312718	0.304514	0.23224					J	24	0	0	0		0	0	0
K	1	Sample X241	37029	46477	49808					K	1	2.94164	6.74351	9.76452					K	1	2.72413	6.5072	9.56123		0.763508	0.854637	0
K	2	Sample X242	52854	59884	60667					K	2	14.9923	1075.09	-189.906					K	2	14.6815	1074.82	-190.142		-316.239	-25.6029	1
K	3	Sample X243	51038	66225	71562					K	3	11.4478	-22.5803	-13.3113					K	3	11.2303	-22.8166	-13.5146		2.32552	-3.0931	1
K	4	Sample X244	52205	59739	59922					K	4	13.5359	476.427	1600.06					K	4	13.2252	476.157	1599.83		280.918	198.325	1
K	5	Sample X245	34570	45744	49276					K	5	2.41545	6.26824	9.1561					K	5	2.19794	6.03193	8.95281		0.73022	0.844358	0
K	6	Sample X246	49664	59288	56403					K	6	9.59365	173.062	32.2512					K	6	9.2829	172.791	32.0156		-35.194	2.84159	1
K	7	Sample X247	35370	43645	48694					K	7	2.57511	5.14292	8.55608					K	7	2.3576	4.90662	8.35279		0.861544	0.749398	0
K	8	Sample X248	41911	56231	61833					K	8	4.41028	30.6653	-70.6942					K	8	4.09952	30.395	-70.9298		-25.3312	-9.37867	1
K	9	Sample X249	34311	47576	53241					K	9	2.3659	7.56117	15.9939					K	9	2.14839	7.32486	15.7906		2.11643	1.70527	1
K	10	Sample X250	34303	49225	55302					K	10	2.36438	9.10093	24.1071					K	10	2.05362	8.8306	23.8715		3.76022	2.72723	1
K	11	Sample X251	28540	46978	51273					K	11	1.4733	7.09914	11.8234					K	11	1.25579	6.86283	11.6201		1.18931	1.29554	0
K	12	Sample X252	24284	40418	47229					K	12	0.999832	3.88341	7.2878					K	12	0.689075	3.61308	7.05221		0.859782	0.795392	0
K	13	Sample X253	26160	44660	48104					K	13	1.19385	5.64863	8.00773					K	13	0.976344	5.41232	7.80445		0.598031	0.853513	0
K	14	Sample X254	19075	28460	38727					K	14	0.554368	1.46322	3.37599					K	14	0.24361	1.19289	3.1404		0.486878	0.362099	0
K	15	Sample X255	25548	29590	45284					K	15	1.12824	1.61049	5.99416					K	15	0.910727	1.37418	5.79087		1.10417	0.610018	0
K	16	Sample X256	18271	20607	27804					K	16	0.495519	0.673153	1.38247					K	16	0.184761	0.402824	1.14688		0.186014	0.120265	0
K	17	Sample X257	21783	28045	38172					K	17	0.770796	1.41175	3.22659					K	17	0.553286	1.17544	3.0233		0.461965	0.308752	0
K	18	Sample X258	16961	16582	20861					K	18	0.404343	0.37899	0.693745					K	18	0.0935852	0.108662	0.458156		0.0873737	0.0455714	0
K	19	Sample X259	19044	21064	26512					K	19	0.552056	0.710397	1.23268					K	19	0.334546	0.474089	1.02939		0.138826	0.0868558	0
K	20	Sample X260	15103	14299	16257					K	20	0.28415	0.23517	0.3576					K	20	-0.0266069	-0.0351588	0.122011		0.0392925	0.0185773	0
K	21	Sample X261	16741	19711	21258					K	21	0.389572	0.602584	0.726473					K	21	0.172063	0.366276	0.523185		0.0392273	0.0438903	0
K	22	Sample X262	15681	15180	15804					K	22	0.320461	0.288934	0.32831					K	22	0.00970342	0.0186048	0.0927213		0.0185291	0.0103772	0
K	23	Sample X263	14002	14318	13760					K	23	0.217509	0.236308	0.203287					K	23	0	0	0		0	0	0
K	24	Sample X264	15528	14879	14306					K	24	0.310757	0.270329	0.235589					K	24	0	0	0		0	0	0
L	1	Sample X265	73228	74983	72529					L	1	-11.9497	-10.8428	-12.4769					L	1	-12.1285	-10.9828	-12.6312		-0.41209	-0.0628284	1
L	2	Sample X266	60974	62715	60600					L	2	-130.837	-48.5405	-210.833					L	2	-131.091	-48.7882	-211.038		-40.5624	-9.99337	1
L	3	Sample X267	59781	59741	59847					L	3	568.276	480.125	814.493					L	3	568.097	479.985	814.339		83.5884	30.7802	1
L	4	Sample X268	57358	62286	60658					L	4	44.8126	-57.1807	-192.47					L	4	44.5587	-57.4283	-192.674		-33.8114	-29.6541	1
L	5	Sample X269	59103	59974	55946					L	5	136.853	4805.19	28.3337					L	5	136.675	4805.05	28.1794		-1194.22	-13.5619	1
L	6	Sample X270	53197	59272	57915					L	6	15.8742	169.203	57.452					L	6	15.6203	168.956	57.2477		-27.927	5.20343	1
L	7	Sample X271	58739	56779	61636					L	7	96.6277	36.3078	-78.9059					L	7	96.4488	36.1678	-79.0602		-28.807	-21.9386	1
L	8	Sample X272	43631	53823	59520					L	8	5.13639	17.7364	257.917					L	8	4.88241	17.4887	257.712		60.0559	31.6037	1
L	9	Sample X273	56415	55608	60299					L	9	32.3675	25.9608	-420.56					L	9	32.1886	25.8208	-420.715		-111.634	-56.6129	1
L	10	Sample X274	39286	47117	54300					L	10	3.53457	7.20271	19.4298					L	10	3.28059	6.95503	19.2255		3.06761	1.99311	1
L	11	Sample X275	52407	56507	62569					L	11	13.9625	33.2859	-51.1571					L	11	13.7836	33.1458	-51.3114		-21.1143	-8.13688	1
L	12	Sample X276	27905	36497	47746					L	12	1.39469	2.81847	7.70075					L	12	1.14072	2.57079	7.49641		1.2314	0.794462	0
L	13	Sample X277	42147	56413	57344					L	13	4.50162	32.3481	44.5633					L	13	4.32273	32.208	44.4089		3.05022	5.01078	1
L	14	Sample X278	20549	28623	39185					L	14	0.668487	1.48381	3.50528					L	14	0.414516	1.23613	3.30094		0.516203	0.360804	0
L	15	Sample X279	38180	46956	55092					L	15	3.22869	7.08295	22.9686					L	15	3.04979	6.94292	22.8143		3.96784	2.47056	1
L	16	Sample X280	18574	21898	30719					L	16	0.517429	0.780668	1.76898					L	16	0.263457	0.532992	1.56464		0.257912	0.162648	0
L	17	Sample X281	31950	38994	47822					L	17	1.95633	3.45068	7.76441					L	17	1.77743	3.31065	7.61009		1.07486	0.729082	0
L	18	Sample X282	16808	16832	23136					L	18	0.394054	0.395663	0.890842					L	18	0.140083	0.147988	0.686502		0.134629	0.0683024	0
L	19	Sample X283	27254	33800	38152					L	19	1.31726	2.27099	3.22135					L	19	1.13836	2.13097	3.06703		0.234015	0.241083	0
L	20	Sample X284	16076	16012	18513					L	20	0.345825	0.341684	0.512992					L	20	0.0918534	0.0940086	0.308652		0.0536609	0.0270998	0
L	21	Sample X285	20881	27795	29648					L	21	0.695378	1.38138	1.61834					L	21	0.516481	1.24136	1.46402		0.0556662	0.118443	0
L	22	Sample X286	14213	14954	16279					L	22	0.230033	0.274941	0.359038					L	22	-0.0239387	0.0272657	0.154698		0.0318581	0.0223296	0
L	23	Sample X287	13339	12652	12907					L	23	0.178897	0.140027	0.154322					L	23	0	0	0		0	0	0
L	24	Sample X288	14611	14507	13778					L	24	0.253971	0.247675	0.20434					L	24	0	0	0		0	0	0
M	1	Sample X289	29190	35027	36620					M	1	1.55712	2.50541	2.84645					M	1	1.43383	2.39662	2.75352		0.089225	0.164961	0
M	2	Sample X290	31560	35841	36123					M	2	1.89522	2.67406	2.73516					M	2	1.64984	2.43469	2.52431		0.0224061	0.10931	0
M	3	Sample X291	46398	50434	52982					M	3	6.68983	10.5671	15.3113					M	3	6.56653	10.4583	15.2184		1.19002	1.08149	1
M	4	Sample X292	144	148	192					M	4	-0.411655	-0.411515	-0.409979					M	4	-0.657037	-0.650881	-0.620829		0.00751309	0.00452605	1
M	5	Sample X293	45780	49250	54946					M	5	6.29044	9.12791	22.2329					M	5	6.16714	9.01912	22.14		3.28021	1.9966	1
M	6	Sample X294	31408	38288	39486					M	6	1.87185	3.25718	3.5934					M	6	1.62647	3.01782	3.38255		0.0911826	0.21951	0
M	7	Sample X295	44779	46938	54326					M	7	5.71234	7.06974	19.5303					M	7	5.58904	6.96096	19.4374		3.11911	1.73104	1
M	8	Sample X296	25518	31316	32635					M	8	1.12508	1.85783	2.06788					M	8	0.879697	1.61846	1.85703		0.0596411	0.122166	0
M	9	Sample X297	36562	47215	48861					M	9	2.83322	7.27708	8.72183					M	9	2.70992	7.1683	8.6289		0.365152	0.739872	0
M	10	Sample X298	37614	51249	55346					M	10	3.08385	11.7841	24.3586					M	10	2.83846	11.5447	24.1478		3.15076	2.66366	1
M	11	Sample X299	26258	35734	38875					M	11	1.20458	2.65124	3.41716					M	11	1.08129	2.54245	3.32423		0.195444	0.280368	0
M	12	Sample X300	26429	41997	47519					M	12	1.22345	4.44329	7.51522					M	12	0.97807	4.20392	7.30437		0.775113	0.790788	0
M	13	Sample X301	29924	42992	46252					M	13	1.65614	4.84948	6.59223					M	13	1.53284	4.7407	6.4993		0.439651	0.620807	0
M	14	Sample X302	19939	32820	39022					M	14	0.620242	2.09897	3.45862					M	14	0.374859	1.8596	3.24777		0.347042	0.359114	0
M	15	Sample X303	28171	37232	39474					M	15	1.42724	2.99016	3.58984					M	15	1.30394	2.88138	3.49691		0.153883	0.274121	0
M	16	Sample X304	18868	23510	29668					M	16	0.538996	0.925596	1.62106					M	16	0.293614	0.68623	1.41021		0.180995	0.139575	0
M	17	Sample X305	22302	31115	33206					M	17	0.815826	1.82751	2.16522					M	17	0.692531	1.71872	2.07229		0.0883934	0.17247	0
M	18	Sample X306	17393	20094	24632					M	18	0.43379	0.632361	1.03427					M	18	0.188408	0.392995	0.823418		0.107606	0.0793763	0
M	19	Sample X307	20272	24505	26281					M	19	0.646395	1.02162	1.20711					M	19	0.523101	0.912836	1.11418		0.0503354	0.0738847	0
M	20	Sample X308	15787	16187	19235					M	20	0.327223	0.353034	0.566356					M	20	0.0818405	0.113669	0.355506		0.0604593	0.0342082	0
M	21	Sample X309	16124	19189	20020					M	21	0.348938	0.5629	0.626563					M	21	0.225643	0.454113	0.533633		0.0198798	0.0384987	0
M	22	Sample X310	15270	15460	16757					M	22	0.294545	0.306466	0.390641					M	22	0.0491628	0.0671003	0.179791		0.0281728	0.0163286	0
M	23	Sample X311	12350	12085	11792					M	23	0.123295	0.108786	0.0929306					M	23	0	0	0		0	0	0
M	24	Sample X312	14469	14369	13889					M	24	0.245382	0.239366	0.21085					M	24	0	0	0		0	0	0
N	1	Sample X313	46902	47971	46806					N	1	7.04344	7.89155	6.974					N	1	6.95641	7.84386	6.93087		-0.228247	-0.00319279	0
N	2	Sample X314	71957	73407	72641					N	2	-12.9541	-11.8235	-12.3885					N	2	-13.0782	-11.8895	-12.4318		-0.135591	0.0808	1
N	3	Sample X315	41887	46532	46309					N	3	4.40112	6.78126	6.63009					N	3	4.31409	6.73357	6.58695		-0.0366531	0.284108	0
N	4	Sample X316	51242	49641	50192					N	4	11.7727	9.5668	10.2447					N	4	11.6485	9.5008	10.2013		0.175126	-0.180905	0
N	5	Sample X317	43640	46291	43924					N	5	5.14059	6.6181	5.27557					N	5	5.05356	6.5704	5.23243		-0.334493	0.0223594	0
N	6	Sample X318	60363	62637	64184					N	6	-346.853	-49.9024	-32.3757					N	6	-346.977	-49.9683	-32.4191		4.38731	39.3197	1
N	7	Sample X319	41925	45845	45769					N	7	4.41563	6.3308	6.28364					N	7	4.3286	6.28311	6.24051		-0.0106498	0.238989	0
N	8	Sample X320	60528	72429	70300					N	8	-239.242	-12.5571	-14.6359					N	8	-239.367	-12.6231	-14.6793		-0.514048	28.0859	1
N	9	Sample X321	40650	44661	45571					N	9	3.95995	5.64916	6.16311					N	9	3.87292	5.60147	6.11998		0.129627	0.280882	0
N	10	Sample X322	33532	41725	44157					N	10	2.22268	4.33995	5.38992					N	10	2.09856	4.27395	5.34653		0.268145	0.405996	0
N	11	Sample X323	41074	46703	47299					N	11	4.10467	6.90062	7.34174					N	11	4.01764	6.85292	7.29861		0.111422	0.410121	0
N	12	Sample X324	24289	35369	38906					N	12	1.00032	2.57491	3.42586					N	12	0.876201	2.50891	3.38247		0.218389	0.313283	0
N	13	Sample X325	34606	41062	43043					N	13	2.42242	4.10049	4.87159					N	13	2.3354	4.05279	4.82846		0.193916	0.311633	0
N	14	Sample X326	18099	27964	32567					N	14	0.483222	1.40186	2.05656					N	14	0.359101	1.33586	2.01317		0.169326	0.206758	0
N	15	Sample X327	28039	37915	38860					N	15	1.41102	3.15995	3.41296					N	15	1.32399	3.11226	3.36983		0.0643931	0.25573	0
N	16	Sample X328	15258	21120	24732					N	16	0.293796	0.715021	1.04429					N	16	0.169675	0.649023	1.0009		0.087969	0.103903	0
N	17	Sample X329	24171	31022	32951					N	17	0.988794	1.81362	2.12124					N	17	0.901766	1.76592	2.07811		0.0780468	0.147043	0
N	18	Sample X330	14035	16423	18303					N	18	0.21946	0.368486	0.497818					N	18	0.0953395	0.302488	0.454427		0.0379848	0.044886	0
N	19	Sample X331	18621	23737	25481					N	19	0.520856	0.94704	1.12119					N	19	0.433828	0.899347	1.07806		0.0446789	0.0805293	0
N	20	Sample X332	12711	14342	14993					N	20	0.143321	0.237746	0.277346					N	20	0.0191999	0.171748	0.233956		0.0155518	0.0268444	0
N	21	Sample X333	15190	19450	20912					N	21	0.289556	0.582614	0.697912					N	21	0.202528	0.534921	0.654781		0.0299649	0.0565316	0
N	22	Sample X334	12411	12751	12966					N	22	0.126657	0.145559	0.157652					N	22	0.0025365	0.0795612	0.114262		0.00867512	0.0139656	0
N	23	Sample X335	11682	10936	10848					N	23	0.0870276	0.0476928	0.0431315					N	23	0	0	0		0	0	0
N	24	Sample X336	12365	11286	10853					N	24	0.124121	0.0659975	0.0433902					N	24	0	0	0		0	0	0
						#DIV/0!	138922	24
					138922
						#DIV/0!	#DIV/0!	12
						#DIV/0!	#DIV/0!	6
						#DIV/0!	#DIV/0!	3
						#DIV/0!	#DIV/0!	1.5
						#DIV/0!	#DIV/0!	0.75
						#DIV/0!	#DIV/0!	0.375
						#DIV/0!	#DIV/0!	0.1875
						#DIV/0!	#DIV/0!	0.09375
						#DIV/0!	#DIV/0!	0.046875
						#DIV/0!	#DIV/0!	0.0234375
						#DIV/0!	#DIV/0!	0
[truncated: 11 more columns]
