# Supplementary material for: PDZ-directed substrate recruitment is the primary determinant of specific 4E-BP1 dephosphorylation by PP1-Neurabin
Source: eLife journal article supplement (doi:10.7554/elife.103403), 2024-11-20
Supplement: fig6-data1 [file elife-103403-fig6-data1-v1.zip]

For each Alphafold3 modelling run the archive contains a .cif output file with predicted structural information. Additional files are _data.json, _summary_confidences.json and _job_request.json files that describe input and output parameters of Alphafold3 modelling.

The following folders contain Alphafold3 predictions used in this manuscript:

**fold_pp1_4ebp1_allphospho_neurabin424_594** – folder contains prediction for PP1/Neurabin/5x phosphorylated 4E-BP1 structure.

**fold_pp1_neurabin_4ebp1_pt70_chimera** – folder contains prediction for PP1-4E-BP1 chimera/Neurabin structure where 4-E-BP1 sequences are phosphorylated at T70.

**fold_pp1_neurabin_4ebp1_wt_chimera** – folder contains prediction for unphosphorylated PP1-4E-BP1 chimera/Neurabin structure.
